# Supplementary material for: Mapping the Germline and Somatic Mutation Interaction Landscape in Indolent and Aggressive Prostate Cancers
Source: J Oncol. 2019 Nov 13;2019:4168784. doi: 10.1155/2019/4168784 (PMC6878815; doi:10.1155/2019/4168784)
Supplement: Supplementary Materials — Supplementary Table SA: a comprehensive list of single-nucleotide polymorphisms (herein called genetic variants) and genes associated with increased risk of developing prostate cancer and published GWAS reports denoted by the PubMed ID and actual reference from which the data were extracted. Supplementary Table S1A: a complete list of somatic mutated genes found to be significantly differentially expressed in indolent (sheet-1) and aggressive (sheet-2) tumors matched with controls. Supplementary Table S1B: a complete list of nonsomatic mutated genes found to be significantly differentially expressed in indolent (sheet-1) and aggressive (sheet-2) tumors matched with controls. Supplementary Table S2: a comprehensive list of somatic mutated genes in indolent (sheet-1) and aggressive (sheet-2) PCa obtained from TCGA. Supplementary Table S2A: a complete list of somatic mutated genes found to be significantly differentially expressed in only indolent PCa, only aggressive PCa, and both tumors. Supplementary Table S1: a complete list of significantly differentially expressed somatic mutated genes distinguishing patients with indolent PCa from patients with aggressive PCa. Supplementary Table S3A: a complete list of germline mutated genes significantly associated with indolent PCa. Supplementary Table S3B: a complete list of germline mutated genes significantly associated with aggressive PCa. Supplementary Table ISN4: molecular networks enriched with germline and somatic mutations in indolent PCa. Supplementary Table ISN5: molecular networks enriched with germline and somatic mutations in aggressive PCa. [file 4168784.f1.zip]

Archive with 10 entries (10 files):
- 4168784.f1/Supp_Table_S1.xlsx
- 4168784.f1/Supp_Table_S1A.xlsx
- 4168784.f1/Supp_Table_S1B.xlsx
- 4168784.f1/Supp_Table_S2.xlsx
- 4168784.f1/Supp_Table_S2A.xlsx
- 4168784.f1/Supp_Table_S3A.xlsx
- 4168784.f1/Supp_Table_S3B.xlsx
- 4168784.f1/Supp_Table_SA.xlsx
- 4168784.f1/TABLE-1SN5-AGGRESSIVE-NETWORKS-IPA (1).txt
- 4168784.f1/TABLE-ISN4-INDOLENT-NETWORKS-IPA.txt
