# Supplementary material for: Mapping the Germline and Somatic Mutation Interaction Landscape in Indolent and Aggressive Prostate Cancers
Source: J Oncol. 2019 Nov 13;2019:4168784. doi: 10.1155/2019/4168784 (PMC6878815; doi:10.1155/2019/4168784)
Supplement: Supplementary Materials — Supplementary Table SA: a comprehensive list of single-nucleotide polymorphisms (herein called genetic variants) and genes associated with increased risk of developing prostate cancer and published GWAS reports denoted by the PubMed ID and actual reference from which the data were extracted. Supplementary Table S1A: a complete list of somatic mutated genes found to be significantly differentially expressed in indolent (sheet-1) and aggressive (sheet-2) tumors matched with controls. Supplementary Table S1B: a complete list of nonsomatic mutated genes found to be significantly differentially expressed in indolent (sheet-1) and aggressive (sheet-2) tumors matched with controls. Supplementary Table S2: a comprehensive list of somatic mutated genes in indolent (sheet-1) and aggressive (sheet-2) PCa obtained from TCGA. Supplementary Table S2A: a complete list of somatic mutated genes found to be significantly differentially expressed in only indolent PCa, only aggressive PCa, and both tumors. Supplementary Table S1: a complete list of significantly differentially expressed somatic mutated genes distinguishing patients with indolent PCa from patients with aggressive PCa. Supplementary Table S3A: a complete list of germline mutated genes significantly associated with indolent PCa. Supplementary Table S3B: a complete list of germline mutated genes significantly associated with aggressive PCa. Supplementary Table ISN4: molecular networks enriched with germline and somatic mutations in indolent PCa. Supplementary Table ISN5: molecular networks enriched with germline and somatic mutations in aggressive PCa. [file 4168784.f1.zip › 4168784.f1/Supp_Table_S1.xlsx]

## Sheet: supp-table
Supplementary Table S1 - A complete list of significantly differentially expressed somatic mutated genes distinguishing patients with indolent PCa from patients with aggressive PCa.
Genes	RNAseq			Somatic events
	logFC	p-value	adj p-value	Indolent	Aggressive
FOXP1	-0.149869	0.00219893	0.0121033	5
PAPPA	-0.285626	0.0078976	0.0316041	4
FLRT2	-0.725522	1.22e-07	6.56e-06	3
LMO7	-0.354549	1.54e-05	0.000281463	3
DPYSL3	-0.375122	8.99e-05	0.00108372	3
RAI14	0.25025	0.000327222	0.00289627	3
SIK3	-0.1666	0.000348098	0.00301445	3
DAAM2	-0.460737	0.000351923	0.00303168	3
MYOM1	-0.497566	0.0016427	0.00959788	3
SLIT1	-0.582824	0.00268775	0.014083	3
MOAP1	-0.132917	0.00272785	0.0142388	3
MAML3	-0.163344	0.00361524	0.0175505	3
NES	-0.293063	0.00481168	0.0218291	3
CBX4	0.171403	0.00804469	0.0320051	3
METTL3	0.110767	0.0106995	0.0396005	3
RPE65	-2.00945	1.31e-13	2.2e-10	2
SHCBP1	0.86463	7.78e-13	5.65e-10	2
KIFC2	0.720644	4.99e-10	7.86e-08	2
ASPA	-0.988215	1.68e-09	2.02e-07	2
COL10A1	1.40926	6e-09	5.84e-07	2
ALDH1A2	-0.788302	8.47e-09	7.81e-07	2
KIAA0907	0.377553	4.55e-08	3.07e-06	2
C16orf59	0.474313	2.16e-07	1e-05	2
FAM13C	-0.600666	6.26e-07	2.35e-05	2
KIF11	0.449445	2.02e-06	5.86e-05	2
UIMC1	0.135181	3.28e-06	8.6e-05	2
SLC35F1	-0.775035	4.09e-06	0.000102103	2
PRUNE2	-0.544068	4.44e-06	0.000108205	2
MEIS2	-0.577409	5.72e-06	0.000130918	2
SPRED3	0.360651	6.39e-06	0.000141467	2
VAV2	0.220494	1.03e-05	0.000203076	2
HIVEP3	-0.319313	1.85e-05	0.000324933	2
FEN1	0.224871	2.52e-05	0.00041168	2
NCAPD3	-0.777271	2.61e-05	0.00042377	2
B3GNT4	0.389033	2.69e-05	0.000430835	2
DNAJB5	-0.446355	3.22e-05	0.000501993	2
PGR	-0.577257	5.22e-05	0.000732131	2
FAM57A	-0.270848	6.74e-05	0.000880521	2
PROCA1	0.326283	0.000171119	0.00178258	2
PHTF2	0.21061	0.00019317	0.00195913	2
BACE2	-0.387305	0.000234312	0.00226068	2
CACHD1	-0.415067	0.000268795	0.00248413	2
MTUS2	-0.575217	0.000411425	0.00341059	2
ARMCX2	-0.380851	0.000457938	0.0036866	2
IL1RL2	-0.612339	0.000566992	0.0043177	2
SEC31B	0.405533	0.000681227	0.00496388	2
ZNF514	0.172328	0.00124701	0.00780037	2
MGAT5	-0.176644	0.00220057	0.0121087	2
DIP2C	-0.144244	0.00228243	0.0124293	2
APBB1	-0.219458	0.00230414	0.0125326	2
REL	-0.289345	0.00237466	0.0128329	2
EFCAB1	-0.483382	0.00315916	0.0159499	2
LTF	-1.06337	0.00370205	0.0178733	2
SLC12A4	-0.218493	0.0041556	0.0195455	2
ALDH1A3	-0.30985	0.00458559	0.0210784	2
ZBTB7B	0.161304	0.00501784	0.0225006	2
CPPED1	-0.182852	0.00674916	0.0281707	2
ASXL1	0.111054	0.00719689	0.0294852	2
ARHGEF1	0.115046	0.00732756	0.029881	2
CDH3	-0.329006	0.00757135	0.0306244	2
ADCY1	-0.365395	0.0079256	0.0316955	2
PROS1	-0.274868	0.00799395	0.0318789	2
STK26	-0.227212	0.00835343	0.0329452	2
HIST1H2BN	0.219292	0.00898782	0.0347082	2
ST8SIA4	0.269376	0.00981793	0.0370292	2
DNAJC10	-0.169353	0.0109964	0.0405203	2
DTNA	-0.321269	0.0113419	0.0414451	2
LOXL1	0.201175	0.0138315	0.0480465	2
PTPDC1	0.109514	0.0144128	0.0496004	2
SPAG5	0.752227	1.27e-15	1.16e-11	1
FMOD	-1.24815	1.17e-15	1.16e-11	1
PLK1	0.845127	6.18e-15	1.9e-11	1
KIF4A	0.910481	5.61e-11	1.62e-08	1
SPC24	0.747527	5.89e-11	1.64e-08	1
AURKB	0.80727	7.87e-11	1.99e-08	1
NCAPG	0.840313	9.46e-11	2.29e-08	1
PRC1	0.545202	9.78e-11	2.34e-08	1
WDR62	0.685784	1.12e-10	2.54e-08	1
CENPF	0.837833	1.4e-10	2.9e-08	1
RCBTB2	-0.376062	5.3e-10	8.19e-08	1
DSN1	0.266299	7.04e-10	1.03e-07	1
CPNE6	-1.60911	1.02e-09	1.39e-07	1
NOX4	0.940219	2.26e-09	2.57e-07	1
OIP5	0.588041	2.78e-09	3.09e-07	1
GRIA3	-1.12503	2.95e-09	3.22e-07	1
ATP1A2	-1.04389	3.7e-09	3.94e-07	1
PYGM	-0.918094	5.99e-09	5.84e-07	1
COL23A1	-0.799062	7.52e-09	7.09e-07	1
SSPO	0.770891	8.25e-09	7.64e-07	1
GLB1L3	-1.25856	1.47e-08	1.23e-06	1
CAPN6	-1.25282	1.48e-08	1.23e-06	1
ERCC6L	0.556252	1.82e-08	1.45e-06	1
GEMIN4	-0.326864	4.13e-08	2.84e-06	1
TAOK3	-0.438974	5.83e-08	3.69e-06	1
ANO7	-0.976892	6.15e-08	3.87e-06	1
PACSIN1	0.510548	7.55e-08	4.55e-06	1
ANGPTL1	-0.892724	8.55e-08	4.97e-06	1
LDB3	-0.875538	1.17e-07	6.39e-06	1
SYNM	-0.813713	1.22e-07	6.56e-06	1
GABRD	0.832655	1.36e-07	7.12e-06	1
B3GALT2	-0.845745	1.45e-07	7.43e-06	1
PARP11	-0.294348	1.66e-07	8.17e-06	1
QSER1	-0.492262	2.22e-07	1.02e-05	1
NCAPG2	0.339565	2.34e-07	1.07e-05	1
MYH11	-0.826609	3.61e-07	1.5e-05	1
HLF	-0.565402	5.86e-07	2.23e-05	1
TRIM52	0.220099	1.09e-06	3.57e-05	1
ACTC1	-1.24764	1.58e-06	4.81e-05	1
ZBTB4	-0.211729	1.77e-06	5.28e-05	1
EME2	0.513594	1.81e-06	5.36e-05	1
DIAPH3	0.595419	1.93e-06	5.67e-05	1
ARSD	-0.285248	2.3e-06	6.46e-05	1
TBC1D31	0.314694	2.53e-06	7.05e-05	1
SCN2B	-0.753407	2.65e-06	7.28e-05	1
CHRM1	-0.707176	2.96e-06	7.93e-05	1
FGF10	-0.845855	3.19e-06	8.43e-05	1
ST6GALNAC1	-0.711859	3.2e-06	8.44e-05	1
CHRNA2	-0.890793	3.37e-06	8.73e-05	1
ZNF862	0.322335	3.57e-06	9.17e-05	1
ACOX1	-0.189073	3.74e-06	9.55e-05	1
PIPOX	-0.430676	3.8e-06	9.65e-05	1
PRICKLE2	-0.495906	4.01e-06	0.000100647	1
GDF10	-0.926425	4.08e-06	0.000101976	1
SCUBE3	-0.55469	4.48e-06	0.000108512	1
SYNPO2	-0.701492	4.85e-06	0.000115543	1
FAM111B	0.637954	4.9e-06	0.000116119	1
LPAR1	-0.472795	4.96e-06	0.000117368	1
C11orf80	0.277714	5.26e-06	0.000122603	1
TRMU	0.280788	5.27e-06	0.000122603	1
PLOD1	-0.218462	5.84e-06	0.000132498	1
ARHGEF9	-0.222756	6.22e-06	0.000138706	1
PCED1B	0.472596	6.75e-06	0.000147825	1
SMPDL3B	-0.497383	7.92e-06	0.000166915	1
CCNB1	0.370087	7.95e-06	0.000167067	1
BCAS1	-0.699117	9.2e-06	0.000187093	1
EMILIN3	-0.538733	1.3e-05	0.00024604	1
PREP	-0.243342	1.38e-05	0.000257652	1
FAM83H	0.295406	1.43e-05	0.000265884	1
ANO5	-0.673406	1.85e-05	0.000324933	1
NKAPL	-0.566834	2.07e-05	0.000353748	1
FNDC3A	-0.274776	2.35e-05	0.000390526	1
ERC1	-0.231815	3.38e-05	0.000520803	1
ZGLP1	0.493257	5.05e-05	0.000714951	1
ASB2	-0.586792	5.06e-05	0.000714951	1
TMEM181	-0.190647	5.45e-05	0.000756823	1
PPP2R5B	0.177013	5.75e-05	0.000786686	1
SLC16A10	-0.440528	5.85e-05	0.000794975	1
NAP1L5	-0.361135	6.68e-05	0.000874641	1
THSD1	-0.346832	7.12e-05	0.000916422	1
MCM5	0.176847	7.19e-05	0.000922057	1
LRFN5	-0.57261	7.2e-05	0.000923475	1
SMPDL3A	-0.331941	8.43e-05	0.00103598	1
FANCI	0.243962	8.51e-05	0.00104331	1
NYAP1	-0.429387	8.91e-05	0.00107563	1
RNF122	-0.32803	9.31e-05	0.00111467	1
TGFBRAP1	-0.174714	9.41e-05	0.00112346	1
INPPL1	0.127737	9.87e-05	0.00116509	1
TENM2	-0.536818	0.000103044	0.00120488	1
FBXL20	-0.142085	0.000106656	0.00123304	1
ADPGK	-0.2612	0.000117232	0.00132944	1
ACO1	-0.19791	0.000118869	0.00134511	1
YJEFN3	0.552515	0.000123285	0.00138699	1
RGS7BP	-0.591634	0.000125853	0.00140798	1
FAM69B	0.28448	0.000141479	0.00154454	1
PHYHIPL	-0.522288	0.00014261	0.00155412	1
BTD	-0.228239	0.000148031	0.00159434	1
LSG1	0.128579	0.000154053	0.00165052	1
SLC26A1	0.307217	0.000155253	0.00166144	1
RELL2	0.337369	0.000157104	0.00167638	1
ZNF18	-0.234113	0.000180247	0.0018515	1
TPP1	-0.185006	0.000197763	0.00199662	1
PRKCB	-0.538168	0.000200488	0.00201462	1
SYP	0.464277	0.000201568	0.00202095	1
CPT1B	0.433837	0.000212247	0.00211078	1
RBM39	0.132373	0.000214695	0.00213168	1
KCNH6	-0.865203	0.000226453	0.00220604	1
OVGP1	-0.426337	0.000236017	0.00227119	1
TTLL5	-0.150204	0.000238994	0.0022796	1
CORO2B	-0.398024	0.000241678	0.00230043	1
FABP3	-0.485175	0.000243172	0.00230869	1
LUZP2	-0.706077	0.000250756	0.00235761	1
TIFA	-0.277336	0.000253042	0.00237306	1
UBAC1	0.142154	0.000268001	0.00248215	1
C20orf194	-0.277866	0.000274196	0.00252518	1
CPEB3	-0.307222	0.000288812	0.00263245	1
PLEKHF2	0.247678	0.000303734	0.0027397	1
LRRC56	0.270837	0.000314396	0.00281795	1
THUMPD2	0.181925	0.000332228	0.00292556	1
MAP4K4	0.168434	0.000348457	0.00301614	1
DUSP16	-0.224581	0.000381956	0.00322432	1
LMX1B	0.625879	0.000393753	0.00329223	1
HAPLN2	-0.513549	0.000396202	0.0033112	1
GTF3C6	-0.282139	0.000426077	0.00350525	1
TREX2	0.325649	0.000426641	0.00350676	1
KNOP1	0.153506	0.000429868	0.00351915	1
GAA	-0.223621	0.000436637	0.00356191	1
AFF2	-0.533538	0.000450292	0.00365228	1
RSPO3	-0.600973	0.000451723	0.00365945	1
EPHA4	-0.355876	0.000454087	0.00366692	1
TRHDE	-0.552746	0.000467865	0.00375425	1
SLC37A3	0.196774	0.000473155	0.00377794	1
CCDC151	0.399474	0.000479429	0.00380324	1
IQSEC3	-0.524959	0.0004829	0.00382091	1
PAQR5	0.349833	0.000495841	0.00389653	1
PPM1L	-0.280606	0.000507825	0.00397545	1
ASB6	0.104245	0.000526272	0.00409896	1
ZBTB7C	-0.444264	0.000536473	0.00415732	1
MAML2	-0.349032	0.000583778	0.00441033	1
PABPC1L	0.470716	0.000598266	0.00449626	1
MCM3	0.126193	0.000604246	0.00453392	1
ZNF3	0.14067	0.00060502	0.00453777	1
NT5E	-0.382002	0.000623884	0.00465652	1
ATE1	-0.151155	0.000645494	0.00477909	1
DPAGT1	-0.15267	0.000653081	0.00482557	1
VPS29	0.112086	0.000653692	0.00482815	1
APOBEC3F	-0.410285	0.000655554	0.00482836	1
TAF4	0.147134	0.000654678	0.00482836	1
GREB1	-0.485735	0.000680801	0.00496274	1
SPATA18	-0.462502	0.000724382	0.00520832	1
RSAD2	0.405816	0.000733938	0.00525651	1
PRDM5	-0.300796	0.000757652	0.00537002	1
ITIH6	-0.619589	0.000757654	0.00537002	1
YBX2	-0.493031	0.000783002	0.00551785	1
DNMBP	-0.201036	0.000801368	0.00562788	1
PSPC1	0.108296	0.000811508	0.00568567	1
OAT	-0.323887	0.000847625	0.00585678	1
FAXC	-0.184801	0.000849988	0.00586871	1
F2R	0.368925	0.000851992	0.00588034	1
GUF1	-0.138583	0.000954355	0.0063984	1
SCN3B	-0.480913	0.000969061	0.00648198	1
C16orf70	-0.211306	0.000980343	0.00653609	1
MFN2	-0.119121	0.0010412	0.00685031	1
SNX22	0.403651	0.00105667	0.00692962	1
CYP2D7	0.458153	0.00108625	0.00705581	1
PRDM11	-0.20188	0.00110902	0.00715579	1
WDR4	0.17706	0.00112569	0.00723297	1
PXN	-0.170204	0.00119146	0.00753732	1
CFL2	-0.283349	0.00119561	0.00754806	1
CLIP3	-0.36988	0.00124262	0.00778084	1
GPRASP2	-0.163316	0.00126946	0.00790859	1
LARP4B	-0.113384	0.00133847	0.00823586	1
PANK1	0.336758	0.00136378	0.00833559	1
TNRC6B	-0.150634	0.00141772	0.00858835	1
GANC	-0.126687	0.00142012	0.00860009	1
TACSTD2	-0.244869	0.00144457	0.00872023	1
SRPK3	0.383651	0.0014447	0.00872023	1
RYK	0.103973	0.00145749	0.00877733	1
DYNC1I1	-0.354182	0.00145866	0.00877865	1
SERBP1	-0.107975	0.00154238	0.00919121	1
SHMT2	0.195686	0.00155617	0.00925041	1
SLC30A4	-0.377506	0.00155735	0.00925172	1
CLVS2	-0.627895	0.00156114	0.00926824	1
SERPINF1	-0.381309	0.00159347	0.00938759	1
NPY4R	-0.782086	0.00159523	0.00939446	1
PER2	-0.244657	0.00162704	0.00953055	1
DDX19B	-0.135201	0.0016402	0.00958935	1
SLC25A42	-0.214015	0.001887	0.0107128	1
DNAJC16	-0.121564	0.00196177	0.0110613	1
MRPL13	0.161377	0.00198958	0.0111814	1
MTG1	0.236793	0.00199228	0.0111932	1
ZNF33B	-0.141453	0.00212837	0.0117818	1
FGGY	-0.174701	0.00216122	0.0119385	1
CSRNP1	-0.324777	0.00218556	0.0120477	1
SLC17A5	-0.210475	0.00223333	0.0122306	1
SLC9A3	0.565859	0.00225648	0.0123381	1
FXYD3	-0.356601	0.00225698	0.0123381	1
ANKRD35	-0.388208	0.00230347	0.0125326	1
GPHN	-0.12084	0.00231447	0.0125763	1
BEND7	0.287112	0.0023149	0.0125763	1
SEMA3A	-0.460675	0.00234834	0.0127184	1
CAND2	-0.324715	0.00241285	0.0130049	1
H2AFY	0.116084	0.00244988	0.0131418	1
NEGR1	-0.402399	0.00251435	0.013376	1
2019-09-08	0.129898	0.00256055	0.013563	1
ZNF607	0.122333	0.00257181	0.0136031	1
ATXN2L	0.130573	0.00262284	0.0138254	1
CNTNAP2	-0.506095	0.00268726	0.014083	1
THEG	0.419141	0.00269791	0.0141282	1
PCK2	0.186297	0.00276032	0.0143693	1
AMDHD2	0.171199	0.00277735	0.0144294	1
RPA1	-0.0960171	0.00279989	0.0145178	1
RXRB	0.0672334	0.00283033	0.0146464	1
SPTLC2	-0.128764	0.00287092	0.0148236	1
HDAC10	0.265789	0.00287768	0.0148418	1
FYCO1	-0.178964	0.00288671	0.0148718	1
CYP39A1	-0.289674	0.00289749	0.014915	1
GATAD2A	0.112402	0.002899	0.0149184	1
TSPAN12	0.298452	0.00296867	0.0152386	1
ANO8	0.170384	0.002992	0.015337	1
BTG1	0.151183	0.00300329	0.0153863	1
DAZAP2	-0.0928184	0.00301456	0.0154311	1
AGPAT5	-0.182776	0.00310519	0.0157811	1
RAB40A	-0.361243	0.00315152	0.0159244	1
ATP6V0D2	-0.57749	0.00332278	0.0165091	1
RBPJ	-0.119657	0.00335505	0.0166514	1
EN2	0.803295	0.0034823	0.0170988	1
ANKRD27	-0.100096	0.00352086	0.0172331	1
CCDC74A	0.340226	0.00368412	0.0178317	1
DPYSL4	-0.505	0.00370598	0.0178733	1
ZFP69	-0.233013	0.00371421	0.0179036	1
ZNF331	-0.173824	0.00374618	0.0180435	1
HEMK1	0.137425	0.00376372	0.0181139	1
DIRAS3	-0.330842	0.00384387	0.0183939	1
HBB	-0.471896	0.00394056	0.0187494	1
FUCA2	-0.152516	0.00398228	0.0189089	1
TNK2	0.182247	0.00404507	0.0191528	1
BCAM	-0.254764	0.00408174	0.0192768	1
FAM8A1	-0.117857	0.00411891	0.0194126	1
CAV2	-0.295511	0.00412201	0.0194222	1
EFS	-0.394659	0.0041239	0.0194262	1
RNF207	0.290168	0.00425122	0.0198685	1
KCNMA1	-0.341842	0.00426423	0.0199088	1
RFX1	0.124713	0.00426525	0.0199088	1
NINL	-0.321355	0.00432757	0.020124	1
METTL7A	-0.253506	0.00436537	0.0202479	1
ZBTB20	-0.29112	0.00443669	0.0205013	1
POTEH	-0.625835	0.00463429	0.0212492	1
PABPN1	0.160275	0.0046706	0.0213626	1
RBFOX2	-0.127915	0.00468775	0.0214251	1
CEP72	0.149369	0.00479076	0.0217712	1
SYTL4	-0.191438	0.00480988	0.0218291	1
MAK	0.341212	0.00481381	0.0218333	1
KANK2	-0.259528	0.0048839	0.0220752	1
LPA	-0.441685	0.00488731	0.0220852	1
ZNF425	0.154422	0.00496157	0.0223331	1
ZBTB38	-0.17799	0.00499969	0.0224554	1
GPER1	-0.354767	0.00501449	0.0225004	1
CALD1	-0.260419	0.00504478	0.0226028	1
ACE2	0.374212	0.00514018	0.0229298	1
KLC2	0.125913	0.00518836	0.0230739	1
NADK2	0.125365	0.00532068	0.0235074	1
TMEM214	-0.120566	0.0053901	0.0237118	1
RHOBTB2	-0.173472	0.00547743	0.0240195	1
LMBRD1	-0.123877	0.00548163	0.0240253	1
DHX34	0.132717	0.00553088	0.0241696	1
WDR37	-0.131844	0.00569323	0.0247033	1
NDC1	0.131852	0.00577242	0.0249353	1
FAM13B	-0.143971	0.00581418	0.0250746	1
BRINP1	-0.504781	0.00582424	0.0251079	1
PEX19	-0.0925312	0.00588476	0.0253138	1
SLC14A1	-0.591266	0.00597522	0.0256001	1
NIT2	0.11605	0.00617575	0.0262894	1
LRRC2	-0.459662	0.00620753	0.0263942	1
E2F3	0.178678	0.00656655	0.0275834	1
SLMAP	-0.164048	0.00658254	0.0276317	1
RRBP1	-0.153623	0.00661176	0.0277164	1
SMG6	-0.195246	0.00684955	0.0284543	1
FAM184A	-0.250938	0.00688046	0.028557	1
OLFM4	-0.973399	0.00706671	0.0291332	1
MTR	-0.133883	0.00718933	0.0294804	1
TAF1D	0.1604	0.00727304	0.029731	1
NHS	-0.291299	0.00729186	0.029775	1
MTX1	0.112299	0.00737723	0.0300105	1
GINS3	0.153804	0.00739647	0.0300689	1
METRN	0.246507	0.00743664	0.0301911	1
FST	-0.383514	0.00751159	0.0304094	1
RILPL2	-0.165706	0.00752019	0.0304375	1
PLD3	-0.119004	0.00783039	0.031417	1
MFN1	0.122286	0.00789689	0.0316041	1
CRTAC1	-0.429945	0.00817235	0.0323802	1
UMPS	0.0950162	0.0081843	0.0323935	1
POP1	0.131284	0.0082522	0.0326069	1
ARRDC1	0.15362	0.00837006	0.0329862	1
GINM1	-0.0952315	0.0084192	0.0331091	1
AIMP2	0.13914	0.0086245	0.0337051	1
MYNN	0.0921452	0.0086576	0.0337441	1
ITGA7	-0.310716	0.00874863	0.0340198	1
SYT12	0.324196	0.00907696	0.034928	1
ENTPD6	-0.145169	0.00919173	0.0352592	1
OPRL1	0.199437	0.00924701	0.0353976	1
ENTPD7	-0.186094	0.00928517	0.0355215	1
HUNK	0.367578	0.00931131	0.0355846	1
TCF7L1	-0.249653	0.00934722	0.0356996	1
RBPMS2	-0.275177	0.0093948	0.0358327	1
DENND2A	-0.270212	0.00981741	0.0370292	1
WISP2	-0.566179	0.00984545	0.0370875	1
NCKAP5L	-0.216684	0.010066	0.037782	1
FAM169A	-0.302736	0.0102101	0.0382033	1
CNOT10	0.0718214	0.010572	0.0392229	1
WWOX	-0.15992	0.0107232	0.0396785	1
RPTOR	-0.0994228	0.0108084	0.0399554	1
GGA2	-0.0911262	0.0110921	0.040783	1
TBXAS1	-0.23773	0.011502	0.0418478	1
RBM5	0.120666	0.0115205	0.0418821	1
STK39	-0.219368	0.0116869	0.0423514	1
DPY19L1	-0.181309	0.0121555	0.0436395	1
EMB	-0.188426	0.0125913	0.0448459	1
CLPTM1	-0.107331	0.0127965	0.045401	1
EXOSC4	0.188959	0.0132597	0.0466673	1
MATN2	-0.268168	0.0133326	0.0468017	1
AKAP11	-0.155349	0.013352	0.0468222	1
CNOT3	0.0751565	0.0135885	0.047419	1
ATAD2B	0.125703	0.0142241	0.0490525	1
PTPRT	0.569565	0.0143924	0.0495468	1
EPHB1	-0.566116	0.000350885	0.00302563		5
KIAA1614	-0.267766	0.00560687	0.0244178		5
SACS	-0.253526	0.00597418	0.0256001		5
SMAD4	-0.175417	4.63e-05	0.000668067		4
PCDHA1	1.14466	5.04e-05	0.000714951		4
TNS1	-0.476627	0.000121121	0.00136599		4
CACNA1C	-0.381934	0.000174648	0.00180911		4
DEPDC1	0.58757	0.00029578	0.00268637		4
PCDHGA9	-0.461581	0.000709696	0.00512472		4
LRP4	-0.342302	0.000976062	0.00651226		4
KLHL2	-0.136842	0.0124072	0.0443445		4
CDC20	0.935581	1.23e-13	2.2e-10		3
ARHGEF39	0.594794	4.61e-13	4.82e-10		3
CGNL1	-0.40701	7.85e-09	7.31e-07		3
SKIV2L2	-0.249928	3.39e-08	2.43e-06		3
FAM196A	-0.698126	8.41e-07	2.94e-05		3
IL6ST	-0.317776	1.97e-06	5.74e-05		3
ATP2B4	-0.539948	5.43e-06	0.000125379		3
TGFBR3	-0.442521	1.53e-05	0.000280619		3
TIGD3	0.389715	2.46e-05	0.000404489		3
NOS1	-0.810771	7.86e-05	0.00098553		3
SRSF2	0.124915	0.000238216	0.00227601		3
MYO9A	-0.175921	0.00048804	0.00385417		3
KIF13A	-0.178583	0.000539912	0.00417695		3
UBR3	-0.188738	0.000572101	0.00434638		3
WIF1	-0.724501	0.00312245	0.0158251		3
LRGUK	0.297126	0.0075008	0.0303799		3
ERBB4	-0.389866	0.0130186	0.0459888		3
NYNRIN	-0.310993	0.0136105	0.0474759		3
POLQ	0.86464	8.36e-12	3.5e-09		2
COMP	1.43951	8.59e-10	1.24e-07		2
CKAP2L	0.84497	9.68e-10	1.34e-07		2
SMOC1	-1.09808	4.88e-09	4.89e-07		2
RHBDD1	-0.190846	6.14e-09	5.93e-07		2
CCDC178	-0.879824	1.26e-08	1.08e-06		2
CDH24	0.360113	2.22e-08	1.71e-06		2
ADRA1D	-1.08266	8.22e-08	4.85e-06		2
TRAF2	0.252767	1.55e-07	7.75e-06		2
NUDT12	-0.43572	3.13e-07	1.35e-05		2
ADRA1A	-0.935713	4.8e-07	1.91e-05		2
ISM2	-0.906022	5.24e-07	2.04e-05		2
CPAMD8	-0.623202	7.86e-07	2.82e-05		2
MS4A14	0.61633	1.22e-06	3.91e-05		2
TRPC4	-0.616995	1.37e-06	4.27e-05		2
MCTP2	-0.435408	3.14e-06	8.31e-05		2
CLK2	0.223232	3.7e-06	9.47e-05		2
C19orf57	0.347339	9.4e-06	0.000189754		2
ARSB	-0.273929	9.63e-06	0.00019336		2
ZNF516	-0.506268	1.3e-05	0.000247115		2
TTC17	-0.164644	1.74e-05	0.000309036		2
HECW1	-0.812823	1.94e-05	0.000336687		2
JPH2	-0.642439	2.19e-05	0.000370108		2
ZNF750	-0.793027	3.7e-05	0.000558991		2
CACNB4	-0.497935	4.44e-05	0.00064762		2
TFAP2E	0.375586	6.06e-05	0.000816545		2
TELO2	0.246031	6.38e-05	0.000848678		2
RHOBTB3	-0.295664	8.08e-05	0.00100585		2
B4GALNT4	0.513897	0.000101073	0.0011856		2
CCT6P3	0.256393	0.000101392	0.00118859		2
DSCC1	0.304554	0.000192879	0.00195833		2
SLITRK4	-0.790892	0.000242588	0.00230671		2
TTLL3	0.345978	0.0002956	0.00268606		2
GRIN3A	0.895827	0.000308789	0.0027785		2
CA2	0.646973	0.0003167	0.00283033		2
KANK1	-0.251861	0.000337682	0.0029562		2
DNMT3A	0.184213	0.000345786	0.00300431		2
DCLRE1C	-0.167395	0.000382623	0.00322552		2
GLI3	-0.342116	0.000412726	0.0034183		2
MTG2	0.125484	0.000433408	0.00354184		2
NBEAL2	0.242884	0.000474843	0.00378642		2
TRIM9	-0.474282	0.00047647	0.00379282		2
LDLR	-0.363651	0.000673114	0.00492122		2
AKAP8L	0.160432	0.000678557	0.0049503		2
LCN2	-0.932184	0.000713707	0.00514562		2
DDIT4	0.366871	0.000741466	0.00529262		2
ZBTB34	0.188763	0.000828675	0.00577128		2
ANKS3	0.21311	0.000833274	0.00579232		2
PLEKHA6	-0.243147	0.000879184	0.0060229		2
WFS1	-0.211946	0.000982331	0.00654461		2
IRS1	-0.350734	0.00106734	0.00698225		2
PEG3	-0.295757	0.0011955	0.00754806		2
TARBP1	0.228932	0.00139739	0.0084987		2
SETBP1	-0.258559	0.00148077	0.00890298		2
GSTM2	-0.430589	0.00148423	0.00891507		2
NEFM	-0.75314	0.00153086	0.00914153		2
SNX31	-0.585707	0.00154268	0.00919121		2
FANCB	0.275855	0.00159234	0.00938759		2
KLHL4	-0.484631	0.00183881	0.0105072		2
THSD4	-0.367704	0.00216901	0.0119672		2
CENPP	0.183482	0.0022139	0.0121574		2
ITGA10	0.289927	0.00245285	0.0131513		2
CPD	-0.185454	0.00257295	0.0136052		2
G3BP2	-0.156666	0.00290209	0.0149302		2
ALOX15	0.897448	0.00303825	0.0154995		2
TGFB1I1	-0.359046	0.0031186	0.0158231		2
SMPD2	-0.202632	0.00318457	0.0160342		2
ALS2CL	0.348883	0.00343401	0.0169294		2
SEMA3E	-0.440514	0.00432313	0.0201179		2
ZBTB32	0.302124	0.0045445	0.0209208		2
DHX38	-0.122038	0.00466542	0.0213536		2
MMP26	-0.643358	0.00467468	0.0213757		2
CYC1	0.165242	0.00495633	0.0223205		2
CLASRP	0.177354	0.0049745	0.0223695		2
TBX3	-0.218563	0.00501291	0.0225004		2
TLN1	-0.168295	0.00520547	0.0231204		2
CILP	-0.355077	0.00529866	0.0234382		2
TRIM31	-0.455441	0.00600924	0.0257112		2
PASK	-0.223352	0.00646435	0.0272855		2
MDM4	0.135631	0.00660671	0.0277086		2
IPO8	-0.0944198	0.00768225	0.0309507		2
NPHP4	0.130767	0.00819901	0.0324369		2
GOLGB1	-0.110762	0.00824332	0.0325913		2
VARS2	0.129919	0.0086477	0.0337214		2
SHANK2	-0.186378	0.00919577	0.0352612		2
ACACB	-0.225541	0.00940729	0.0358695		2
SRSF1	0.0748418	0.0100344	0.0376875		2
PPFIBP1	-0.152806	0.0112638	0.041257		2
TTBK2	-0.143385	0.0112687	0.0412596		2
FMN2	-0.373622	0.0121707	0.0436771		2
SELP	-0.275328	0.0122647	0.0439373		2
ACTA1	-0.724163	0.013236	0.0466105		2
KIF18B	1.15327	1.89e-15	1.16e-11		1
VPS36	-0.416649	9.15e-15	2.41e-11		1
SRD5A2	-1.34095	3.22e-13	3.95e-10		1
GTSE1	0.914863	5.49e-13	5.07e-10		1
MMP11	0.921466	1.2e-12	7.37e-10		1
TICRR	0.694252	3.14e-12	1.61e-09		1
JPH4	-1.18912	3.39e-12	1.64e-09		1
TPX2	0.867155	4.02e-12	1.9e-09		1
BIRC5	0.921703	1.41e-11	5.54e-09		1
BUB1	0.841236	2.76e-11	8.98e-09		1
VIT	-1.18857	3.06e-11	9.57e-09		1
SLC5A8	-1.89604	5.75e-11	1.63e-08		1
SLC7A4	-1.87819	6.27e-11	1.71e-08		1
DONSON	0.349801	1.24e-10	2.7e-08		1
SLC22A3	-1.2031	1.54e-10	3.08e-08		1
SRPX	-0.824704	3.41e-10	5.82e-08		1
HERPUD1	-0.500056	8.84e-10	1.25e-07		1
TOP2A	0.858926	9.54e-10	1.33e-07		1
CHTF18	0.509767	1.03e-09	1.39e-07		1
CA14	-0.936982	1.37e-09	1.76e-07		1
GINS1	0.504803	1.65e-09	2.02e-07		1
MUS81	0.229475	1.78e-09	2.09e-07		1
UHRF1	0.744435	2.49e-09	2.81e-07		1
CCBE1	-1.09944	3.19e-09	3.44e-07		1
CCNE2	0.519452	3.33e-09	3.57e-07		1
THBS3	0.348424	3.97e-09	4.18e-07		1
HJURP	0.83858	4.68e-09	4.76e-07		1
WDR90	0.378271	6.02e-09	5.84e-07		1
GAS2L3	0.559955	1.02e-08	9.06e-07		1
MCM10	0.782993	1.11e-08	9.67e-07		1
ARHGAP11A	0.519823	1.14e-08	9.87e-07		1
ARHGAP11B	0.490227	1.64e-08	1.34e-06		1
KIF18A	0.538039	2.08e-08	1.64e-06		1
DTL	0.637691	2.31e-08	1.75e-06		1
TRAIP	0.341533	2.42e-08	1.8e-06		1
TRIP13	0.521001	5.28e-08	3.43e-06		1
LACC1	-0.393248	5.43e-08	3.51e-06		1
NPEPL1	0.460615	5.56e-08	3.57e-06		1
PTN	-0.950746	6.21e-08	3.89e-06		1
KANK4	-0.914405	7.89e-08	4.71e-06		1
NVL	0.358166	9.25e-08	5.33e-06		1
SPDL1	0.294942	9.87e-08	5.56e-06		1
SPAG1	0.447682	1.49e-07	7.56e-06		1
PPARGC1A	-0.786927	1.53e-07	7.66e-06		1
SPRY3	-0.578393	1.96e-07	9.42e-06		1
CSRP1	-0.571143	2.01e-07	9.62e-06		1
TYMS	0.401387	2.22e-07	1.02e-05		1
HRASLS5	-0.86558	2.89e-07	1.27e-05		1
METTL6	0.160536	3.09e-07	1.34e-05		1
LINC00173	0.818572	3.38e-07	1.43e-05		1
GSTM5	-0.727101	3.53e-07	1.47e-05		1
MCM7	0.262267	3.99e-07	1.62e-05		1
ZNF707	0.26504	4.21e-07	1.71e-05		1
SLC12A7	0.222981	5.42e-07	2.09e-05		1
COL4A3BP	-0.282221	7.36e-07	2.68e-05		1
ESCO2	0.644681	7.55e-07	2.74e-05		1
FAM217B	-0.291565	8.9e-07	3.08e-05		1
MYBPC1	-1.06585	9.17e-07	3.14e-05		1
STAT5B	-0.185008	9.96e-07	3.37e-05		1
DCBLD2	-0.324681	1.02e-06	3.41e-05		1
AKAP7	-0.456776	1.02e-06	3.41e-05		1
ANGPT1	-0.721025	1.06e-06	3.48e-05		1
PLXDC1	0.428679	1.14e-06	3.72e-05		1
CLN5	-0.240078	1.34e-06	4.22e-05		1
LINC00969	0.440837	1.4e-06	4.37e-05		1
CHRDL1	-0.805425	1.64e-06	4.97e-05		1
NRG2	-0.732421	1.66e-06	5.02e-05		1
B3GAT1	-0.778816	1.78e-06	5.3e-05		1
E2F8	0.693332	1.94e-06	5.68e-05		1
BMP6	0.703351	2.08e-06	5.96e-05		1
FMO4	-0.368478	2.14e-06	6.08e-05		1
KCTD14	-0.704995	2.23e-06	6.32e-05		1
CKMT2	-0.57057	2.71e-06	7.44e-05		1
GSTM3	-0.522639	2.72e-06	7.44e-05		1
FZD3	-0.363094	3.13e-06	8.31e-05		1
NTRK3	-0.702361	3.29e-06	8.61e-05		1
CEACAM1	-0.657426	4.05e-06	0.000101666		1
C7	-0.795806	4.31e-06	0.000106309		1
CYP7B1	-0.444352	4.59e-06	0.000110976		1
TTC21A	0.313088	4.62e-06	0.000111263		1
CDC6	0.452196	5.67e-06	0.000130229		1
TRAK1	-0.224083	5.81e-06	0.000132412		1
ANXA11	-0.221534	6.13e-06	0.000137547		1
COG6	-0.258673	6.22e-06	0.000138707		1
MCC	-0.491609	6.35e-06	0.000140953		1
GLI4	0.334065	6.69e-06	0.000146995		1
SLC25A21	-0.331944	6.85e-06	0.000149545		1
GNB1L	0.29682	7.1e-06	0.000154203		1
MCTP1	0.446234	7.5e-06	0.000159767		1
SNRPA1	0.192737	8.27e-06	0.000172712		1
VILL	-0.583097	8.28e-06	0.000172815		1
ARPC5L	0.213925	8.72e-06	0.000179598		1
DIMT1	-0.172872	9.26e-06	0.000188114		1
TLR5	-0.323736	9.33e-06	0.00018876		1
CES2	-0.189837	9.72e-06	0.000194994		1
BLM	0.36741	1.23e-05	0.000236578		1
SLC22A17	-0.394966	1.28e-05	0.000244468		1
ZBTB24	-0.26046	1.41e-05	0.000262306		1
TCF19	0.254352	1.46e-05	0.000271016		1
XPO6	0.281465	1.47e-05	0.00027105		1
NTRK1	-0.584337	1.54e-05	0.000281159		1
STOX2	-0.503445	1.58e-05	0.000288018		1
ENGASE	0.289264	1.58e-05	0.000288018		1
FAM227B	-0.199307	1.7e-05	0.000303007		1
XK	-0.670012	1.89e-05	0.000329283		1
VANGL2	-0.6194	1.94e-05	0.000336688		1
ANXA4	-0.202308	2.04e-05	0.000350011		1
MCM4	0.305328	2.06e-05	0.000353748		1
CRNKL1	-0.158934	2.17e-05	0.0003673		1
SH3BP2	0.21149	2.31e-05	0.000387107		1
FLNA	-0.56991	2.44e-05	0.000401815		1
GARS	0.194129	2.63e-05	0.000424603		1
SH3PXD2B	-0.34901	2.65e-05	0.000427969		1
TRAF3IP2	-0.324389	2.66e-05	0.000428973		1
C21orf62	-0.741848	2.86e-05	0.000453428		1
MDFIC	-0.366018	2.97e-05	0.00046978		1
ZWILCH	0.225684	3.45e-05	0.000528815		1
PKNOX2	-0.496416	3.89e-05	0.000583736		1
SNX33	-0.162551	3.91e-05	0.000585565		1
THY1	0.468349	3.92e-05	0.000586884		1
SUN1	0.163119	4.28e-05	0.000630328		1
NUP107	0.142832	4.31e-05	0.000632904		1
DGKQ	0.244452	4.59e-05	0.000664654		1
MBNL2	-0.359684	4.66e-05	0.000671385		1
MAGI2	-0.28873	4.77e-05	0.000683656		1
IQGAP2	-0.382191	5.15e-05	0.000725367		1
MYO5C	-0.252172	5.18e-05	0.000727215		1
PRR16	0.735439	5.25e-05	0.000733982		1
SUMF2	-0.210773	5.51e-05	0.000762918		1
POLD3	0.137685	5.7e-05	0.000783698		1
LIMK1	0.176229	6.02e-05	0.000812301		1
MTA1	0.188592	6.03e-05	0.000813283		1
KPNA5	-0.255052	6.07e-05	0.000816545		1
ANTXR2	-0.378542	6.08e-05	0.00081708		1
ITPR1	-0.512065	6.28e-05	0.000838885		1
SCAP	0.161535	6.33e-05	0.000844112		1
FBXO6	0.212288	6.4e-05	0.000850364		1
RASL12	-0.522063	6.72e-05	0.000878465		1
SLC39A14	-0.232946	7.03e-05	0.000909005		1
CCDC69	-0.412481	7.03e-05	0.000909005		1
SLC18A2	-0.794373	7.1e-05	0.000914555		1
ABCA8	-0.507087	7.25e-05	0.000928498		1
CAMK2N2	0.522745	7.72e-05	0.00097328		1
KLHL14	-0.615799	7.78e-05	0.000977841		1
E4F1	0.213224	7.96e-05	0.000994126		1
PKP2	-0.242297	8.13e-05	0.00100955		1
SLC25A23	-0.182852	8.16e-05	0.00101248		1
TNFRSF18	0.510798	8.56e-05	0.00104726		1
C6orf89	-0.111409	9.32e-05	0.00111467		1
ESRP1	0.2444	9.8e-05	0.0011599		1
IFI30	0.48405	9.89e-05	0.0011662		1
KIAA1217	-0.216815	0.000100418	0.00118059		1
KLHL36	-0.208864	0.000104306	0.00121655		1
MCM2	0.232411	0.000105001	0.0012211		1
SEZ6L2	-0.412023	0.000116062	0.0013178		1
ARHGAP39	0.245013	0.000125591	0.00140672		1
HSD11B1	-0.530418	0.000125915	0.00140798		1
SMAD9	-0.295251	0.000126712	0.00141347		1
NAAA	-0.3073	0.000135406	0.00148971		1
CYP4F2	-1.30559	0.000146016	0.00157725		1
PSMG3	0.251409	0.000147185	0.00158616		1
ELP3	-0.193123	0.000178649	0.00183816		1
UVSSA	0.263072	0.000180862	0.00185461		1
DDX24	-0.126471	0.000180952	0.00185461		1
MPHOSPH8	-0.117165	0.000189682	0.00193013		1
AOC3	-0.443148	0.000193524	0.00196164		1
LGR6	-0.740523	0.000205242	0.00205331		1
ZDHHC15	-0.471538	0.000211828	0.0021089		1
ETV6	-0.19626	0.000213288	0.00212		1
IDE	-0.181086	0.000221895	0.00217968		1
C9orf139	0.358365	0.00022327	0.00218968		1
KCNQ5	-0.520977	0.00022465	0.00219626		1
TYW3	-0.132822	0.000225891	0.00220249		1
ANPEP	-1.1838	0.000226493	0.00220604		1
LPP	-0.267223	0.000226866	0.0022085		1
FSCN2	0.33736	0.000234469	0.00226079		1
SMOX	-0.372321	0.000237411	0.00227506		1
NDEL1	-0.154071	0.000238248	0.00227601		1
FZD5	-0.324802	0.000244709	0.00231731		1
INHA	0.463237	0.00025192	0.00236615		1
TIPARP	-0.351357	0.00026083	0.00243248		1
BRIP1	0.340112	0.00026463	0.0024596		1
SEC14L5	-0.514398	0.000292827	0.00266611		1
CA8	-0.661722	0.0002974	0.00269842		1
FOXP2	-0.514336	0.000301187	0.00272383		1
CSAD	0.329907	0.000313164	0.002811		1
NLRP12	-0.651993	0.000319856	0.00285024		1
ALCAM	0.276118	0.000324424	0.00287711		1
KCNAB1	-0.480577	0.000332041	0.00292556		1
NCAM1	-0.630785	0.000336555	0.00295054		1
TAF6L	0.163514	0.000338797	0.00296315		1
AOC1	-1.19651	0.000342785	0.00298951		1
STARD8	-0.38561	0.000343698	0.00299316		1
SFSWAP	0.120501	0.000343853	0.00299316		1
TLL2	0.42376	0.000348731	0.0030171		1
FERMT2	-0.318705	0.000349926	0.00302176		1
PDE1C	-0.654052	0.000352062	0.00303168		1
SLC19A2	0.260715	0.000360661	0.00308984		1
GNAO1	-0.496546	0.000363271	0.00310499		1
ZWINT	0.34632	0.000382437	0.00322552		1
ZNF395	-0.170713	0.000383998	0.00323415		1
SUSD4	-0.383262	0.000402774	0.00335245		1
CCDC115	-0.132844	0.000417383	0.00345186		1
FZD7	-0.342127	0.00042376	0.00349242		1
PBX1	-0.239868	0.000432114	0.0035344		1
ADAMTS8	-0.396636	0.000453413	0.00366469		1
FANCD2	0.207222	0.000454312	0.00366713		1
SCARA5	-0.765876	0.000457551	0.0036852		1
ISX	0.605037	0.000468145	0.00375425		1
SLC7A8	-0.338773	0.000470498	0.00376807		1
PDK2	-0.204953	0.0004711	0.00376962		1
NXN	-0.183835	0.000472896	0.00377794		1
SLC20A1	0.180685	0.00049215	0.00387745		1
SORBS3	-0.227874	0.000506085	0.00396351		1
PIBF1	-0.169777	0.000514099	0.00401773		1
CCDC85A	-0.502354	0.000526944	0.00410157		1
PGAP1	-0.270422	0.000533498	0.00413949		1
LUC7L	0.247345	0.000543201	0.00418833		1
YY2	0.287702	0.000544232	0.00419277		1
HIST2H2AC	0.333789	0.000548904	0.00422171		1
POLG	0.121778	0.00058396	0.00441033		1
MRVI1	-0.440783	0.000594449	0.00447123		1
TRIM38	-0.286128	0.000601349	0.0045176		1
PSRC1	0.247625	0.000604261	0.00453392		1
TSPAN9	-0.161575	0.000634445	0.00471244		1
KDELC2	-0.238094	0.000656533	0.00483248		1
MAMDC2	-0.44557	0.000660914	0.00485619		1
ZC3H3	0.171792	0.000668657	0.00490044		1
INTS9	-0.142207	0.000673584	0.00492122		1
SH3GLB2	0.221935	0.000683205	0.00497436		1
WSB1	0.233221	0.000712956	0.00514425		1
NEDD4	-0.271013	0.000713994	0.00514567		1
FAM181B	-0.420908	0.000735744	0.00526535		1
PSMA6	0.142512	0.000746879	0.00532073		1
AP5Z1	0.162814	0.000746924	0.00532073		1
MAP7D2	-0.483339	0.000759383	0.00537813		1
ZNF83	0.213429	0.000762617	0.00539425		1
RBM6	0.21186	0.000796369	0.00559706		1
PCP4	-0.579131	0.00080982	0.0056786		1
SHISA2	0.632594	0.00082614	0.00575798		1
KLHDC9	0.214163	0.000830647	0.00577932		1
ADCY6	0.185187	0.000833581	0.00579232		1
MYOT	-0.704351	0.000845344	0.0058454		1
TTC22	-0.49738	0.000869431	0.00597082		1
PI16	-0.851936	0.000905744	0.00615906		1
CCDC136	-0.329665	0.000922406	0.00623783		1
BANP	0.13039	0.000958664	0.00642176		1
CSF3	-1.04358	0.000959088	0.00642226		1
ALDH6A1	-0.229712	0.000969894	0.0064852		1
GGN	0.296877	0.000977369	0.00651862		1
ZNF606	0.148935	0.00103996	0.00685031		1
NT5C3A	0.161867	0.00104271	0.0068527		1
PRPH2	-0.43228	0.00106282	0.00696007		1
FAM91A1	0.171801	0.00107347	0.0070124		1
CFL1	0.135855	0.00108308	0.00704327		1
CXCR2	-0.601917	0.00108787	0.00706215		1
LIMK2	-0.180085	0.00109004	0.00706554		1
GAD1	0.451736	0.00111616	0.00719182		1
DDX39B	0.248568	0.00111987	0.0072107		1
MEX3B	0.33166	0.00114877	0.00734032		1
TEAD1	-0.257522	0.00115241	0.00735849		1
TMEM184A	0.264883	0.00115969	0.00739233		1
UNC13A	0.497275	0.0011655	0.00741379		1
IVD	-0.20125	0.00117473	0.00745708		1
KCNN3	-0.377451	0.00118477	0.00750272		1
CAPZB	-0.121111	0.00121336	0.00763914		1
BNC2	-0.389299	0.00126543	0.00789417		1
ITGA6	-0.201697	0.00129524	0.00803386		1
CACNB2	-0.238726	0.00134759	0.00827399		1
TDP2	-0.176745	0.00135559	0.00830755		1
GPALPP1	-0.143465	0.00136268	0.00833436		1
SPECC1L	-0.144185	0.00137275	0.00837926		1
ZMYND11	-0.126975	0.00137567	0.00839155		1
CYP2D6	0.347019	0.00137653	0.00839403		1
UTP23	0.157003	0.00137721	0.00839539		1
FTO	-0.16265	0.00139952	0.00850884		1
FBXO16	-0.206932	0.00140248	0.00852171		1
SIRT7	0.150445	0.00141146	0.00856169		1
GPR155	-0.250298	0.00143249	0.00866355		1
OGT	0.235087	0.00145131	0.00875158		1
SLC9B2	-0.326484	0.00145249	0.00875292		1
MAST4	-0.253301	0.00153653	0.0091667		1
CSTF3	0.109249	0.00154468	0.00920016		1
NDC80	0.281578	0.00157785	0.00934037		1
TSHZ2	-0.318351	0.00158037	0.00934933		1
COBL	-0.220042	0.00159971	0.00941236		1
LSM11	-0.189476	0.00163321	0.00955758		1
PLEKHH3	0.191633	0.00170281	0.00990413		1
TMEM246	-0.473697	0.00186457	0.0106214		1
SPON1	-0.432194	0.00186799	0.0106362		1
AMOT	-0.344272	0.00202131	0.0113184		1
ZNF804A	-0.485807	0.00202252	0.0113217		1
TMEM132A	0.324849	0.00205575	0.0114694		1
TLDC1	-0.119202	0.00216292	0.0119408		1
ARID3B	-0.137588	0.0022136	0.0121574		1
PSMC6	0.0913392	0.00222445	0.0121992		1
ARHGEF10	-0.171742	0.00227769	0.0124141		1
DOCK1	-0.176422	0.00232179	0.0126026		1
GRM2	0.320061	0.00234727	0.0127184		1
ADAMTS14	0.429575	0.00236709	0.0127995		1
RUSC1	0.167217	0.00245752	0.0131726		1
PDK4	-0.512781	0.00246366	0.0131943		1
CAPN12	0.35065	0.00248898	0.0132948		1
GANAB	-0.128597	0.00249348	0.0133149		1
CCDC40	0.204069	0.00249912	0.0133373		1
MTHFD1L	0.267854	0.00252088	0.0134069		1
HIST1H2AG	0.464123	0.00252283	0.0134134		1
SPATA5L1	0.119115	0.00256797	0.0135867		1
CHRD	-0.369472	0.00268091	0.0140631		1
BPIFB1	-0.72076	0.00276985	0.0144098		1
MYLK3	-0.432286	0.00285974	0.0147783		1
TTYH3	0.194456	0.00288218	0.0148609		1
TNRC18	0.144758	0.00301561	0.0154311		1
ATP9B	-0.119032	0.00301449	0.0154311		1
PDCD5	0.150974	0.00304046	0.0155035		1
PIK3C3	-0.107018	0.00310376	0.0157782		1
PROM1	-0.646964	0.00313278	0.0158558		1
BEND3	0.279276	0.00318184	0.0160248		1
ZNF215	-0.429851	0.00319871	0.0160747		1
FXR2	-0.134722	0.00327445	0.0163394		1
MOB3C	-0.152975	0.00343735	0.0169367		1
CA12	-0.359255	0.00353395	0.0172787		1
NR4A3	-0.62758	0.00353767	0.0172878		1
BAIAP2L2	0.520334	0.00354075	0.0172982		1
PCNT	0.1308	0.00356856	0.0173788		1
GNAZ	-0.323419	0.0035715	0.0173885		1
GBA2	0.124463	0.00358434	0.017428		1
MORN3	0.313917	0.00361293	0.0175485		1
KHDRBS3	0.437179	0.00366826	0.0177704		1
METTL14	-0.0963563	0.00377202	0.0181443		1
RSPRY1	-0.112812	0.0038068	0.0182877		1
CA13	0.360991	0.00381619	0.0183089		1
ZMIZ2	0.115057	0.00381827	0.0183094		1
NUFIP1	-0.137875	0.00383657	0.0183733		1
DIO1	0.639808	0.0038477	0.0184074		1
ZFYVE1	-0.0942383	0.00388918	0.0185673		1
CHMP3	-0.093639	0.00394287	0.0187508		1
PSMD6	0.0947004	0.00394651	0.0187561		1
LRRC37B	0.128399	0.00408687	0.0192912		1
TMEM243	-0.194847	0.00414419	0.0195068		1
RSPO1	-0.418273	0.00431487	0.0200895		1
C6orf62	0.0992251	0.00434482	0.0201882		1
CPED1	-0.378918	0.00441772	0.0204415		1
CNTN1	-0.422989	0.00443881	0.020506		1
FBXO5	0.145032	0.00453723	0.0208935		1
DSTN	-0.147861	0.00455678	0.0209616		1
ITPKB	-0.13826	0.00472482	0.0215624		1
RBMX	0.0840572	0.00473885	0.0215944		1
DHX32	-0.131775	0.00475165	0.0216473		1
SEL1L	-0.221316	0.00478099	0.021738		1
GCC2	-0.182902	0.00480006	0.0217978		1
KLK1	-0.51107	0.00483341	0.0218932		1
ZKSCAN1	-0.157199	0.00494084	0.0222616		1
DUOX1	-0.433191	0.00494561	0.0222776		1
NOB1	-0.155341	0.00504919	0.0226115		1
CHFR	0.106918	0.00507576	0.0227084		1
STRA6	0.38886	0.00533965	0.0235686		1
CMTR2	-0.166338	0.00534714	0.0235848		1
L3MBTL4	-0.347256	0.00540925	0.0237734		1
TTC38	-0.180863	0.00544922	0.0239148		1
CTNND2	0.303199	0.00549248	0.0240588		1
KIAA1024	0.284097	0.00559563	0.0243882		1
C1orf43	0.110909	0.00560322	0.0244104		1
PAGR1	0.15249	0.00561848	0.0244395		1
SAMD3	0.353662	0.00561873	0.0244395		1
KRT14	-0.644022	0.00563037	0.0244766		1
2019-03-01	0.238296	0.00564005	0.0245072		1
TBC1D22B	0.133053	0.00573477	0.0248193		1
DSC3	-0.551782	0.00587024	0.0252632		1
ADA	0.229627	0.00589264	0.0253359		1
EOMES	0.483931	0.00610217	0.0260423		1
ZNF212	0.0899305	0.00614059	0.026176		1
HNRNPD	0.0816263	0.006337	0.0268332		1
PTBP1	0.0840562	0.00636932	0.0269515		1
ORC3	-0.125247	0.00647213	0.0273113		1
MOV10L1	0.455082	0.006504	0.0274018		1
SH3D19	-0.152021	0.00652351	0.0274589		1
SLC44A4	-0.206379	0.00659426	0.0276746		1
ANAPC2	0.117226	0.0066159	0.0277275		1
ZFPM1	0.170895	0.00664061	0.0278121		1
YEATS2	0.120927	0.006706	0.0280229		1
NBEAP1	0.894223	0.0067564	0.0281881		1
DNAJC2	0.108018	0.00678978	0.0282826		1
SCYL1	0.109881	0.00708128	0.0291867		1
ADGRG1	-0.191824	0.00712591	0.029341		1
SOD3	-0.301327	0.00713705	0.029351		1
GOT2	-0.16721	0.00721376	0.0295204		1
FAM122A	-0.0969179	0.00737489	0.0300076		1
LRRC14	0.140745	0.00740424	0.0300938		1
RASSF9	-0.335798	0.007501	0.0303799		1
LILRB3	0.257836	0.00761693	0.0307595		1
NANP	-0.102708	0.00787836	0.0315408		1
RAC3	0.256791	0.00795536	0.0317663		1
COX7A1	-0.352097	0.00798982	0.0318704		1
CCDC110	-0.241639	0.00818389	0.0323935		1
TBX5	-0.555131	0.00837759	0.0329952		1
FAM135A	-0.311721	0.00840391	0.0330701		1
HAUS4	-0.124172	0.00844267	0.0331643		1
FGF7	-0.405584	0.00844404	0.0331643		1
SV2B	-0.495164	0.00849082	0.0333196		1
COBLL1	-0.187056	0.00870221	0.0338822		1
TMEM87B	-0.150054	0.00890768	0.034529		1
SERINC3	-0.077015	0.00896203	0.0346667		1
C15orf56	-0.369491	0.00905186	0.0348716		1
HEY2	0.324676	0.00904849	0.0348716		1
METTL18	0.116012	0.00911998	0.0350513		1
SLC16A3	0.24951	0.00920028	0.03527		1
KLHL15	-0.171586	0.00924536	0.0353976		1
ALYREF	0.126852	0.00945551	0.0360162		1
LRRN3	-0.432369	0.00964268	0.0365311		1
ZNF782	0.144026	0.00968428	0.0366275		1
EMILIN2	-0.228072	0.0097533	0.0368534		1
C22orf23	-0.215446	0.0097852	0.0369285		1
ZNF154	-0.282869	0.00982586	0.0370397		1
FANCF	0.12799	0.00983185	0.0370438		1
CDKL2	-0.393908	0.00989886	0.0372658		1
TUBB4A	-0.630953	0.0104425	0.0388835		1
KLHL6	0.303682	0.0104781	0.039008		1
PALD1	0.240294	0.010618	0.039378		1
TAOK2	0.0857207	0.01063	0.0394065		1
EPDR1	-0.208915	0.0107541	0.0397704		1
TMEM192	-0.128529	0.0108275	0.0400018		1
CCDC8	-0.322554	0.0109419	0.0403517		1
NMNAT1	-0.0838028	0.0111017	0.0408105		1
ZKSCAN7	-0.208208	0.0111518	0.0409374		1
CDYL	0.0992159	0.0111739	0.0410023		1
ZNF471	0.126975	0.0112197	0.0411246		1
RERGL	-0.402626	0.0113123	0.0413617		1
ATXN7	0.135879	0.0113778	0.0415189		1
NLN	-0.16608	0.0113901	0.0415472		1
CCNG1	-0.144566	0.0114425	0.041693		1
MSH5-SAPCD1	0.282215	0.0114616	0.0417503		1
RTF1	-0.0826314	0.0117394	0.0424765		1
EVX1	-0.382608	0.0118661	0.0428427		1
CDK5	0.141731	0.0120053	0.0432183		1
GCNT4	-0.308293	0.0120637	0.0433945		1
CCDC39	0.233632	0.0121959	0.043737		1
ABCC8	-0.416756	0.0123506	0.0441763		1
SRMS	0.428305	0.0124407	0.0444043		1
CACYBP	0.111329	0.0125305	0.0446813		1
B4GALNT1	-0.292095	0.0127691	0.0453329		1
COX10	-0.0851012	0.0128102	0.0454325		1
MRPL15	0.144188	0.0128427	0.0455125		1
PSMA1	0.0862381	0.0128932	0.0456563		1
DCAF4	0.087216	0.0129575	0.0458487		1
CSGALNACT1	-0.282852	0.0129951	0.0459643		1
DOPEY1	-0.163461	0.0130983	0.0462047		1
ZSCAN22	0.0908364	0.0132695	0.0466749		1
NELL2	-0.403173	0.0133328	0.0468017		1
RPRD1B	0.124205	0.0133643	0.0468566		1
DHFR	0.204484	0.0138808	0.0481541		1
PICK1	-0.158017	0.0138881	0.0481707		1
CCDC148	0.186653	0.0139079	0.0482303		1
TECPR2	-0.0941741	0.0140176	0.0484826		1
TRMT1	0.141324	0.0141757	0.0489746		1
