# Supplementary material for: Mapping the Germline and Somatic Mutation Interaction Landscape in Indolent and Aggressive Prostate Cancers
Source: J Oncol. 2019 Nov 13;2019:4168784. doi: 10.1155/2019/4168784 (PMC6878815; doi:10.1155/2019/4168784)
Supplement: Supplementary Materials — Supplementary Table SA: a comprehensive list of single-nucleotide polymorphisms (herein called genetic variants) and genes associated with increased risk of developing prostate cancer and published GWAS reports denoted by the PubMed ID and actual reference from which the data were extracted. Supplementary Table S1A: a complete list of somatic mutated genes found to be significantly differentially expressed in indolent (sheet-1) and aggressive (sheet-2) tumors matched with controls. Supplementary Table S1B: a complete list of nonsomatic mutated genes found to be significantly differentially expressed in indolent (sheet-1) and aggressive (sheet-2) tumors matched with controls. Supplementary Table S2: a comprehensive list of somatic mutated genes in indolent (sheet-1) and aggressive (sheet-2) PCa obtained from TCGA. Supplementary Table S2A: a complete list of somatic mutated genes found to be significantly differentially expressed in only indolent PCa, only aggressive PCa, and both tumors. Supplementary Table S1: a complete list of significantly differentially expressed somatic mutated genes distinguishing patients with indolent PCa from patients with aggressive PCa. Supplementary Table S3A: a complete list of germline mutated genes significantly associated with indolent PCa. Supplementary Table S3B: a complete list of germline mutated genes significantly associated with aggressive PCa. Supplementary Table ISN4: molecular networks enriched with germline and somatic mutations in indolent PCa. Supplementary Table ISN5: molecular networks enriched with germline and somatic mutations in aggressive PCa. [file 4168784.f1.zip › 4168784.f1/Supp_Table_S1A.xlsx]

## Sheet: IndolentVsNormal_genes_info
Supplementary Table S1A - A complete list of somatic mutated genes found to be significantly differentially expressed in indolent tumors matched with controls.
Gene name	logFC	P.Value	adj.P.Val	Somatic events
FAT4	0.797402	7.66e-05	0.000234937	10
SPOP	0.368464	6.09e-13	9.64e-12	9
AHNAK2	1.32575	1.63e-10	1.54e-09	8
OBSCN	0.593302	0.00145373	0.00342138	7
FZD2	0.707131	2.03e-06	8.52e-06	6
CHD7	-0.377837	0.00016772	0.000481799	6
KDM6A	-0.219502	0.0289418	0.0493468	5
ARID1A	-0.298566	5.18e-05	0.000164936	5
DNAH2	-0.543767	0.000580171	0.0014881	5
MDN1	-0.253786	0.00494062	0.0102494	5
CNTNAP1	0.483069	0.00195323	0.0044691	5
HERC2	-0.164305	0.0239246	0.041766	5
NAV2	1.28829	5.9e-13	9.38e-12	5
FBN2	0.642028	0.00342434	0.00740085	5
HHAT	0.438906	0.00116365	0.00279433	5
FAT3	1.46472	4.88e-09	3.39e-08	5
KMT2D	-0.283768	0.00503239	0.0104145	5
BRAF	-0.287902	6.6e-05	0.000204805	5
PKHD1	0.750136	0.019629	0.0350813	5
TP53	-0.302671	0.00717872	0.0142738	5
PLEKHG1	0.576732	0.000222092	0.000621991	5
PTEN	0.402268	0.000733071	0.00184022	5
FBN1	0.438224	0.0074732	0.0147942	5
FOXP1	-0.441369	9.81e-10	7.82e-09	5
ESYT1	0.208048	0.000291121	0.000792551	4
DLEC1	0.434201	0.0104598	0.0199724	4
LGR5	0.918328	8.29e-05	0.000252289	4
SYNE1	0.452725	0.00277583	0.0061239	4
EHHADH	-0.475313	0.00878397	0.0170894	4
CHD6	-0.410782	8.65e-07	3.88e-06	4
LY75	1.01492	5.71e-09	3.91e-08	4
FBN3	0.64706	0.00519486	0.0106962	4
HAS2	0.887363	0.000101147	0.000302932	4
NRP2	1.10374	1.12e-10	1.1e-09	4
DST	0.793354	5.87e-08	3.3e-07	4
PKHD1L1	1.20556	1.4e-07	7.32e-07	4
ASTN1	1.50445	7.24e-07	3.29e-06	4
ANK2	1.22707	2.42e-10	2.21e-09	4
MED1	-0.216131	0.00202473	0.00461779	4
PPP2R2B	1.50471	7.24e-16	2.17e-14	4
COL6A3	0.494311	0.0048277	0.0100457	4
MALAT1	-0.436935	0.00554798	0.0113547	4
TENM3	0.906537	3.37e-06	1.36e-05	4
PAPPA	0.767927	1.13e-06	4.97e-06	4
KDR	0.662945	4.55e-05	0.000146859	4
VPS13B	-0.30016	0.00800678	0.0157352	4
MMP16	0.817887	4.49e-05	0.000144985	3
DNAH11	0.834875	0.000164012	0.0004724	3
LRP1B	1.35168	1.71e-07	8.8e-07	3
KIF1B	-0.258409	0.000709958	0.0017878	3
DAAM2	1.29788	1e-11	1.22e-10	3
CBX4	-0.651388	1.11e-11	1.33e-10	3
NKX3-1	-1.47245	6.2e-20	4.25e-18	3
MAP3K12	0.685018	5.26e-10	4.46e-09	3
SLFN11	0.769857	1.09e-06	4.78e-06	3
KLHL42	0.479433	1.22e-11	1.45e-10	3
ADAM2	-4.16851	9.37e-18	4.22e-16	3
LAMA2	0.512681	0.00414015	0.0087685	3
MAML3	-0.582312	2.72e-12	3.72e-11	3
PLCG2	0.495684	0.000204124	0.000575433	3
DIP2B	-0.613423	5.91e-13	9.39e-12	3
SPTB	0.631481	0.00518584	0.0106812	3
FLRT2	0.587732	0.00298527	0.00653744	3
VAV3	1.39036	1.21e-15	3.43e-14	3
ARNT2	-0.237967	0.0276315	0.0473668	3
APBA1	-0.422347	9.22e-05	0.000278097	3
PIKFYVE	-0.288218	0.00563863	0.0115211	3
GATA6	0.332412	0.0240816	0.0420043	3
OPA1	0.276017	1.83e-06	7.72e-06	3
OSBPL10	0.337392	0.00546892	0.0112154	3
CHAMP1	-0.376957	1.54e-05	5.47e-05	3
ADAMTS3	-0.533072	0.00196678	0.00449844	3
F5	-1.44275	8.36e-06	3.12e-05	3
SRRM2	-0.343283	1.79e-06	7.57e-06	3
FAM135B	0.8768	0.0104725	0.0199924	3
STAC2	2.11372	6.17e-10	5.15e-09	3
PTK7	-0.306603	0.0185026	0.033304	3
MAN2A1	-0.283371	0.00647309	0.0130182	3
THSD7B	0.782242	0.00128313	0.00305734	3
ZC3H13	0.299214	0.000448532	0.00117726	3
KCNT2	0.909148	0.000143729	0.000418031	3
ABCA4	0.947934	2.78e-06	1.14e-05	3
CDH23	1.22903	1.34e-13	2.42e-12	3
SIK3	0.307569	6.24e-06	2.38e-05	3
CLK3	-0.140054	0.00379677	0.0081121	3
KMT2B	-0.226472	0.000130238	0.000382353	3
ZNF536	1.25482	7.29e-07	3.31e-06	3
TRIP10	0.68206	1.54e-12	2.23e-11	3
UPF1	-0.303558	7.52e-10	6.15e-09	3
SLIT1	-3.24217	1.26e-27	4.01e-25	3
LMO7	-0.381748	0.00133507	0.003168	3
BBS4	-0.784504	8.42e-09	5.59e-08	3
NOVA1	0.617391	0.00113677	0.00273406	3
LTBP3	0.422937	4.16e-05	0.000135488	3
COL12A1	-0.615957	0.00724186	0.0143807	3
MYOM1	1.05933	4.67e-06	1.83e-05	3
CAMSAP3	-0.692272	9.57e-14	1.81e-12	3
COPA	-0.213686	0.00249845	0.0055747	3
TMCC2	0.652391	2.68e-06	1.1e-05	3
ITPR2	-0.731873	6.88e-08	3.82e-07	3
STIL	-1.16131	4.84e-21	4.46e-19	3
NES	0.710092	3.14e-06	1.28e-05	3
MOAP1	-0.183763	0.00442497	0.00930328	3
DPYSL3	0.972998	6.28e-12	8e-11	3
UTRN	-0.639097	1.61e-08	1.01e-07	3
LRRK2	0.98035	1.33e-08	8.47e-08	3
DYNC1H1	-0.18162	0.00154523	0.00361502	3
ZFPM2	1.19151	8.44e-08	4.61e-07	3
SPAG9	0.23868	0.00028129	0.000768399	3
FILIP1	1.42015	1.19e-11	1.43e-10	3
AMFR	0.292883	5.73e-07	2.66e-06	3
DMXL2	-0.334071	0.000410332	0.00108581	3
DCHS2	1.43166	2.35e-08	1.43e-07	3
RAI14	0.511561	5.31e-07	2.48e-06	3
MEGF8	-0.203053	0.0145581	0.0268276	3
TMPRSS2	-0.869666	1.06e-05	3.89e-05	3
PHLDB1	0.495171	3.89e-05	0.000127405	3
ECM2	0.420392	0.00641144	0.0129069	3
TG	1.39184	4.46e-06	1.76e-05	3
LAMB1	0.68473	5.82e-06	2.24e-05	3
ZKSCAN5	0.158454	0.000408816	0.00108242	3
TSHZ3	0.854337	9.87e-11	9.83e-10	3
HEXDC	-0.362629	0.00147397	0.00346414	3
ABCC10	0.15738	0.00730299	0.0144917	3
NOTCH4	0.553612	4.2e-06	1.66e-05	3
ROBO2	1.15365	2.68e-08	1.62e-07	3
METTL3	-0.469338	3.63e-13	6.04e-12	3
DNAH5	-2.71423	1.71e-31	1.15e-28	3
SEMA4C	0.164933	0.0212094	0.0374877	3
MMP2	0.714576	1.72e-05	6.07e-05	2
SLC12A4	0.667804	2.84e-09	2.07e-08	2
NCDN	-0.456733	1.51e-09	1.16e-08	2
CACNB1	0.970984	2.64e-11	2.94e-10	2
UIMC1	0.174295	3.66e-05	0.000120623	2
ATP7B	-0.88606	5.4e-12	6.97e-11	2
TTC13	-0.229598	0.000804766	0.00199895	2
TEKT2	0.698276	0.00347306	0.00749697	2
PROS1	-0.473795	0.00171687	0.00397369	2
LRRFIP1	-0.190355	0.00511217	0.0105519	2
DDX50	0.222939	6.06e-08	3.4e-07	2
GRID1	0.825005	1.88e-06	7.94e-06	2
MDC1	0.232273	0.00019298	0.000546357	2
ANO4	0.858613	0.000165423	0.000476093	2
ZNF285	-0.494898	2.9e-10	2.6e-09	2
ZFP36L1	0.91121	1.07e-12	1.6e-11	2
NFE2L3	-1.04226	2.25e-12	3.14e-11	2
PRDM10	-0.285602	3.48e-05	0.0001154	2
SLC16A4	0.984716	1.4e-13	2.52e-12	2
NSFL1C	0.15287	0.000317731	0.000860924	2
ITGAX	-0.667309	1.06e-05	3.89e-05	2
PGR	1.15236	3.6e-08	2.12e-07	2
TRPM3	1.5656	1.21e-12	1.8e-11	2
DNAH8	-1.66762	5.96e-07	2.76e-06	2
SULF1	0.450196	0.0143711	0.0265334	2
CDCA2	-0.653192	0.000234283	0.000652367	2
PTGFRN	0.237512	0.00173384	0.00400926	2
MBOAT7	0.164927	0.0140191	0.0259642	2
UBAP2	-0.409614	3.69e-11	3.98e-10	2
SLIT2	0.489837	0.00114386	0.00275039	2
DTNA	0.99691	9.28e-08	5.04e-07	2
KLK3	-1.7444	9.22e-16	2.7e-14	2
XPO7	0.226628	0.000206219	0.000580804	2
ST8SIA5	-0.453317	0.0120328	0.0226059	2
MAP4	0.31203	3.64e-06	1.46e-05	2
NFATC4	0.956588	5.89e-12	7.54e-11	2
CDK12	-0.215402	0.0111082	0.0210882	2
ACBD5	-0.248403	0.0012637	0.00301534	2
PCDHB8	-1.47816	2.92e-05	9.83e-05	2
HSD17B11	-0.44261	0.00194723	0.00445649	2
URI1	-0.17457	0.00417208	0.00882597	2
GPCPD1	0.43328	5.29e-07	2.47e-06	2
APBB1	0.819302	2.21e-14	4.78e-13	2
FAT2	1.80337	2.8e-11	3.1e-10	2
ALDH1A2	1.25531	3.41e-10	3.01e-09	2
OTX1	-2.96977	7.46e-27	2.02e-24	2
LTBP2	0.482201	0.00203045	0.00462969	2
HIST1H2BN	-1.01035	8.54e-16	2.53e-14	2
DLG4	0.968087	4.21e-14	8.55e-13	2
UNK	0.0987532	0.0285727	0.0487897	2
ROBO1	0.952638	2.14e-09	1.6e-08	2
MUC4	1.36293	0.000242004	0.000671532	2
MIEF1	-0.184048	0.000170343	0.00048865	2
ZCCHC14	0.200054	0.00475794	0.00991511	2
TATDN2	-0.159398	0.00586336	0.0119223	2
B3GNT4	-0.485855	0.000308392	0.000837467	2
DGKI	0.749788	7.6e-06	2.86e-05	2
GGT7	0.388384	0.00507249	0.0104859	2
IQGAP1	0.435065	1.41e-08	8.93e-08	2
TBC1D1	0.941241	4.2e-16	1.33e-14	2
PCDHB10	-0.816138	0.000208345	0.000586345	2
AKAP9	-0.301597	0.00176484	0.00407244	2
SHROOM3	-0.413246	5.02e-05	0.000160314	2
LRRC7	-0.952996	0.000177903	0.000507885	2
CASZ1	-0.376269	8.26e-06	3.08e-05	2
TMEM177	-0.196624	0.0063635	0.0128216	2
TMEM201	-0.246317	3.49e-05	0.000115671	2
SLC12A5	-0.754009	0.000299977	0.000815455	2
C7orf31	1.1006	2.13e-14	4.63e-13	2
ANK3	-0.354499	0.007318	0.0145178	2
ZNF592	-0.11479	0.0185549	0.0333752	2
NF2	-0.194035	0.0037272	0.00798011	2
POM121	-0.416152	2.28e-06	9.49e-06	2
PHTF2	0.521245	3.81e-10	3.34e-09	2
HELQ	0.277963	1.1e-09	8.69e-09	2
PLCE1	0.643839	5.28e-10	4.47e-09	2
ZNF181	-0.162221	0.00901212	0.0174816	2
HNRNPR	-0.131083	0.012359	0.0231478	2
TPCN1	0.399202	2.22e-07	1.12e-06	2
BACE2	-0.584318	0.000139327	0.000406446	2
CMYA5	0.610007	0.00081767	0.00202827	2
DMXL1	-0.463124	0.00209995	0.0047722	2
SLC5A3	0.380429	2.02e-05	7.01e-05	2
DAG1	-0.220174	0.000513799	0.00133262	2
PCSK2	1.73517	4.06e-08	2.36e-07	2
BNIPL	1.89237	1.08e-16	3.86e-15	2
PROCA1	0.357914	0.00452955	0.0094971	2
MTUS2	-0.985821	3.35e-05	0.000111515	2
ZCCHC6	-0.881432	1.51e-14	3.39e-13	2
PLCH1	0.948065	2.65e-05	8.99e-05	2
FAM57A	-0.342593	0.000525309	0.0013598	2
ZNF142	-0.260815	3.94e-06	1.57e-05	2
ZNF616	-0.260307	6.82e-05	0.000211184	2
CCDC180	-0.825616	6.12e-07	2.82e-06	2
FLRT3	1.52381	4.02e-08	2.34e-07	2
SMG7	-0.193377	1.41e-05	5.05e-05	2
ANKRD13A	0.386182	3.7e-08	2.17e-07	2
ASXL1	-0.172507	0.00416534	0.00881474	2
AUTS2	0.380388	0.00267443	0.00592077	2
COL27A1	0.764802	9.19e-05	0.000277536	2
TMC7	-0.347769	0.00131052	0.00311496	2
PTPDC1	-0.266434	4.75e-05	0.000152314	2
RPGRIP1	-0.747315	1.08e-08	7e-08	2
CARD11	0.575824	0.000825193	0.00204494	2
ZFP69B	-0.983541	1.89e-17	8.04e-16	2
APOB	1.29908	3.18e-06	1.29e-05	2
FLNC	1.24552	3.13e-07	1.53e-06	2
DSG2	-0.323428	0.00760365	0.0150279	2
ASPA	1.86517	1.11e-14	2.56e-13	2
PCDHB2	-1.18255	1.7e-05	5.99e-05	2
C14orf159	0.842984	3.77e-09	2.68e-08	2
PARP6	0.657046	4.05e-05	0.000132325	2
ADRB2	-0.998181	1.09e-12	1.62e-11	2
PLEKHH2	0.990305	1.89e-08	1.17e-07	2
VAV2	-0.674267	2.22e-19	1.37e-17	2
CPPED1	0.414575	2.7e-05	9.15e-05	2
SKIV2L	-0.329331	1.7e-10	1.6e-09	2
JAG2	0.599739	2.91e-07	1.43e-06	2
TGM1	1.53737	4.41e-14	8.9e-13	2
PRKCSH	-0.371437	2.42e-08	1.47e-07	2
ASPM	-1.15227	1.03e-08	6.69e-08	2
PRG4	-0.533834	0.00582998	0.011866	2
PLCB1	0.524986	5.16e-07	2.41e-06	2
TRRAP	-0.258551	0.00233807	0.00524671	2
ZFYVE26	0.193075	0.00305774	0.00668423	2
ZEB2	0.822062	4.75e-07	2.24e-06	2
ARHGEF1	-0.149024	0.0169955	0.0308503	2
CRTC3	0.272189	2.12e-06	8.86e-06	2
COL10A1	-2.66527	7.61e-14	1.46e-12	2
NAA25	-0.264872	2.5e-05	8.56e-05	2
AGAP1	-0.470387	1.23e-08	7.87e-08	2
DNER	1.10506	2.95e-05	9.94e-05	2
HSPG2	0.459752	0.00730426	0.0144921	2
SMCR8	-0.357228	3.16e-05	0.000106036	2
DNAJC10	-0.608472	6.33e-10	5.26e-09	2
SLC6A11	-1.97112	1.06e-13	1.97e-12	2
EPN2	0.24516	1.36e-05	4.89e-05	2
MET	1.11337	1.64e-09	1.25e-08	2
KNDC1	0.980744	5.49e-06	2.13e-05	2
ATL2	0.337169	5.72e-06	2.21e-05	2
ST8SIA4	0.442868	0.00358439	0.00771288	2
SPTBN1	0.456692	4.91e-06	1.92e-05	2
PCDH18	0.620378	0.000434201	0.00114257	2
DPYD	0.795107	1.03e-06	4.57e-06	2
COL7A1	0.5263	0.00515531	0.0106254	2
HEATR5B	-0.369942	3.93e-06	1.56e-05	2
SFRP2	0.540053	0.0121574	0.0228073	2
CYP4F12	1.20374	1.07e-05	3.91e-05	2
GRIN2A	1.22567	5.06e-06	1.97e-05	2
VCP	-0.258801	6.23e-06	2.38e-05	2
PCDHGA4	-0.557305	0.00850745	0.0166111	2
ADCY1	-1.19345	4.11e-09	2.9e-08	2
ZDHHC17	0.137287	0.0273041	0.0468797	2
HFM1	0.569543	0.0199825	0.0356336	2
DNAH7	-0.425659	0.00261206	0.0057987	2
SLITRK3	1.37404	0.000109969	0.000327014	2
TCERG1	-0.15069	0.01953	0.0349349	2
UBE2O	-0.347726	1.31e-12	1.93e-11	2
ARHGAP5	0.214454	0.00754813	0.0149294	2
MECOM	1.46953	1.18e-18	6.41e-17	2
NLRP8	-2.20506	1.1e-13	2.03e-12	2
LSR	-0.523537	2.6e-10	2.36e-09	2
FAT1	-0.465702	0.000716875	0.00180349	2
ZHX1	0.215497	0.00362715	0.00779427	2
MAPKBP1	0.395922	3.02e-08	1.8e-07	2
HMGCS1	0.509272	1.36e-05	4.88e-05	2
ZBTB7B	-0.51134	1.66e-09	1.27e-08	2
QARS	-0.370579	3.16e-08	1.87e-07	2
UNC5B	1.54496	3.41e-20	2.53e-18	2
DIP2C	0.289364	2.83e-05	9.57e-05	2
TAGLN2	0.766437	6.42e-11	6.65e-10	2
MUC3A	-0.957022	0.00351897	0.00758718	2
KIF11	-0.621033	6.41e-06	2.44e-05	2
FAM171A1	-0.543047	5.79e-08	3.26e-07	2
KDM1A	-0.278527	2.99e-07	1.46e-06	2
ITGB6	1.65268	4.74e-10	4.05e-09	2
ADAM9	-0.284617	0.0272624	0.0468168	2
PRUNE2	0.429795	0.0121903	0.0228597	2
SLC4A7	-0.412626	3.01e-05	0.000101244	2
PCDHGA12	0.481727	0.0220924	0.0389252	2
ADCY10	-0.608879	0.000171396	0.000491134	2
SPRED3	-0.564912	1.25e-06	5.44e-06	2
SF1	-0.156613	0.000165809	0.000477053	2
NUP210	-1.29316	7.18e-31	3.78e-28	2
NCKAP1	0.317757	1.26e-05	4.54e-05	2
XPR1	0.191845	0.00643789	0.0129531	2
TTC31	-0.230146	5.76e-07	2.67e-06	2
KIAA0907	-0.326077	0.00106918	0.00258771	2
PIK3CA	0.195199	0.0226375	0.0397716	2
ERBB3	-0.872577	1.34e-16	4.72e-15	2
KIFC2	-0.385045	0.0204917	0.0364112	2
FEN1	-0.235637	0.00234241	0.00525515	2
TUBG1	-0.169226	0.0224238	0.0394521	2
CHD4	0.115205	0.0130559	0.0243334	2
PTPRO	0.439787	0.0136783	0.0254019	2
CCDC15	-0.287683	0.00734358	0.0145654	2
MLH3	0.123079	0.00780744	0.0153927	2
DNAJB5	1.18265	1.07e-13	1.98e-12	2
TTC6	-1.66058	5.63e-23	7.57e-21	2
ARHGEF17	0.691471	8.63e-10	6.96e-09	2
TCTN2	-0.294597	0.000677454	0.00171273	2
USP22	-0.341943	2.24e-06	9.32e-06	2
SLC25A12	0.660414	1.01e-22	1.33e-20	2
GTF3C1	-0.617464	6.26e-15	1.52e-13	2
EFCAB1	1.33326	3.12e-08	1.86e-07	2
RELN	-0.662306	0.00826701	0.0161965	2
CSF1R	0.35032	0.0154433	0.0283004	2
GOLGA4	-0.269269	0.00142366	0.00335753	2
DAPK1	-0.731595	1.61e-06	6.85e-06	2
SELENBP1	0.429167	0.000232026	0.000647175	2
CES1	1.23091	8.03e-08	4.4e-07	2
RBL1	0.413863	4.78e-07	2.25e-06	2
HAPLN1	1.20879	0.00215118	0.00487658	2
STK26	1.01038	4.1e-15	1.04e-13	2
DYSF	0.671116	6.13e-06	2.35e-05	2
RBFOX1	1.46356	1.14e-06	5e-06	2
MEIS2	1.18177	2.64e-10	2.39e-09	2
TMEM92	1.00931	0.000282807	0.000772083	2
RANBP6	0.132805	0.0242405	0.0422375	2
LTBP1	0.394138	0.00781108	0.0153982	2
RYR1	0.663494	0.00183322	0.00421387	2
ADAMTS2	-0.404352	0.0270083	0.0464801	2
AHCYL1	0.171317	0.00173398	0.00400926	2
LOXL1	0.624687	2.01e-07	1.02e-06	2
IL1RL2	1.10627	2.01e-05	7e-05	2
RPE65	1.95212	5.49e-07	2.56e-06	2
SLC35F1	0.565961	0.0199809	0.0356336	2
NCAPD3	-1.07273	6.67e-05	0.000206789	2
C17orf80	0.251204	1.99e-07	1.01e-06	2
ATXN2	-0.376904	4.17e-06	1.66e-05	2
GIGYF2	-0.131417	0.0256291	0.0443842	2
DNA2	-0.432277	0.000268811	0.00073836	2
ZNF514	-0.217506	0.0050966	0.0105245	2
LRIG1	-1.28351	2.3e-31	1.46e-28	2
BCL6	0.274535	0.018383	0.033108	2
CEP68	0.57829	5.11e-13	8.22e-12	2
PCDHB13	-0.378062	0.0139212	0.0257959	2
POU2F2	0.685308	9.19e-07	4.1e-06	2
ARHGEF5	-0.264504	4.83e-05	0.000154629	2
BEST3	-0.62819	0.00276247	0.00609808	2
CDH3	0.545905	0.00236737	0.00530729	2
CGREF1	-2.26321	5.67e-37	1.16e-33	2
COL9A1	1.46002	1.56e-05	5.52e-05	2
SRCAP	-0.168499	0.00255015	0.00567769	2
TMEM102	0.338103	0.00251973	0.00561811	2
KLHDC7A	0.995476	0.0021251	0.0048252	2
TEP1	-0.315788	2.64e-06	1.08e-05	2
CYP27B1	-0.611274	3.48e-05	0.000115406	2
MYLK	1.58097	3.31e-13	5.54e-12	2
CLSTN3	-0.229016	0.0264897	0.0456986	2
GOLGA2	-0.295577	9.22e-06	3.42e-05	2
LRP2	0.71176	0.00489468	0.0101667	2
FER	0.612234	2.34e-10	2.15e-09	2
TRPC6	1.39383	1.01e-13	1.89e-12	2
ST5	1.10744	1.74e-18	9.04e-17	2
PCDH17	-0.5296	0.021087	0.0373036	2
RC3H2	-0.143858	0.0250816	0.0435548	2
SGCD	0.686588	0.00177677	0.00409689	2
GPR17	0.464884	0.0198729	0.0354765	2
ALDH1A3	-1.37401	5.04e-17	1.94e-15	2
CPS1	0.870204	0.00894891	0.0173736	2
RNF8	0.234636	1.53e-08	9.62e-08	2
USP28	0.208205	0.00677717	0.0135529	2
C16orf59	-0.912286	1.14e-11	1.38e-10	2
CACHD1	1.0978	6.66e-11	6.86e-10	2
AFG3L2	-0.123955	0.0289025	0.0492933	2
MGAT5	-0.315633	0.000177893	0.000507885	2
SEC31B	-0.557439	0.00133568	0.00316864	2
ADAMTS9	0.368062	0.0180944	0.0326297	2
CFH	0.934069	8.31e-08	4.55e-07	2
DHX30	-0.141696	0.00119932	0.00287362	2
CATSPERG	-0.417734	6.36e-07	2.92e-06	2
PLCH2	0.678379	0.000139919	0.000407851	2
RAPGEFL1	1.22272	3.3e-17	1.33e-15	2
HECTD4	-0.66714	9.07e-12	1.11e-10	2
PIK3R3	-0.251408	0.00815513	0.015996	2
LYST	0.388127	3.72e-05	0.000122322	2
MYH10	-0.278951	0.00130083	0.00309431	2
DHTKD1	-0.697045	2.72e-14	5.78e-13	2
FAM155A	0.828419	0.000655643	0.00166284	2
MANEAL	-0.903696	8.88e-13	1.35e-11	2
EIF2AK3	-0.403682	7.17e-07	3.27e-06	2
TRPM4	-1.65015	1.09e-25	2.39e-23	2
VEZF1	0.324414	1.76e-07	9.06e-07	2
FAM13C	-0.531457	0.00229517	0.00516616	2
DENND5A	0.431174	2.04e-09	1.53e-08	2
IKBIP	0.549479	1.49e-11	1.74e-10	2
SHCBP1	-0.846843	1.06e-06	4.66e-06	2
TNC	0.422972	0.017506	0.0316865	2
NCKAP5	-1.26023	3e-12	4.06e-11	2
MBD6	-0.14774	0.0142654	0.0263579	2
DMBT1	1.32389	0.000333203	0.000898688	2
LTF	1.38848	0.00920569	0.0178196	2
TNN	-1.64381	1.25e-08	7.99e-08	2
DKK1	1.39047	1.05e-05	3.86e-05	2
REL	0.314737	0.0229639	0.0402375	2
PAPLN	0.347439	0.0202698	0.0360802	2
RALGAPA1	-0.339813	4.2e-06	1.66e-05	2
HIVEP3	-0.442883	4.48e-05	0.000144844	2
CYP24A1	1.54211	0.000243744	0.000675546	2
SIN3B	0.26266	3.73e-06	1.49e-05	2
FBXO10	-0.297198	4.83e-06	1.89e-05	2
ARMCX2	0.583637	0.000228514	0.000638328	2
DNAJC13	0.309411	9.61e-06	3.55e-05	2
XPO5	-0.369781	8.35e-12	1.03e-10	2
SLMAP	0.876951	8.89e-22	9.58e-20	1
BBOX1	1.10317	6.83e-05	0.000211571	1
KLHL13	0.989606	2.4e-12	3.33e-11	1
KCNG1	0.904641	1.19e-07	6.33e-07	1
SALL1	0.923472	0.000982341	0.00239325	1
CHD8	-0.143046	0.0107329	0.0204388	1
TMC4	-0.514631	1.18e-08	7.57e-08	1
ZEB1	0.760224	1.87e-07	9.57e-07	1
CHD9	0.469459	3.89e-07	1.87e-06	1
NINL	0.576737	0.000449036	0.00117841	1
MAP3K3	0.288647	3.18e-07	1.55e-06	1
LONP1	-0.219	0.00105584	0.00255812	1
TMEM132E	0.693493	0.000444077	0.0011664	1
SERPINF1	0.939151	1.19e-07	6.34e-07	1
RPS6KA5	0.645734	2.66e-11	2.95e-10	1
TAOK3	-0.684988	6.62e-09	4.49e-08	1
SLK	0.144024	0.0292193	0.0497739	1
CA11	1.08864	8.56e-13	1.31e-11	1
ALDOC	0.895174	6.1e-15	1.48e-13	1
SEL1L3	-0.989082	4.24e-15	1.07e-13	1
ARHGEF9	0.475439	5.6e-11	5.85e-10	1
CTDSP2	0.144059	0.024803	0.043132	1
ROR2	1.32752	9.1e-11	9.13e-10	1
GDF10	1.63317	2.82e-08	1.69e-07	1
CPEB3	-0.29961	0.014866	0.027324	1
FAXC	0.187108	0.0200511	0.0357421	1
NIPSNAP3B	0.607376	1.06e-07	5.71e-07	1
CLCN4	0.380149	0.0226903	0.0398377	1
USP42	-0.285145	1.65e-06	7e-06	1
POMT1	-0.274744	5.03e-06	1.96e-05	1
SNAPC1	0.623869	4.96e-25	9.14e-23	1
DDHD2	0.381497	1.39e-05	4.98e-05	1
MAN2B1	-0.539617	1.92e-12	2.73e-11	1
KDM4B	-0.587893	5.8e-16	1.77e-14	1
CHRM1	-0.867985	7.8e-05	0.000238699	1
ARAP1	0.199789	0.00167625	0.00388895	1
SLC9A3	-0.590434	0.0283188	0.048401	1
FKBP4	-0.38674	2.69e-05	9.13e-05	1
HK3	-0.605943	0.00151752	0.00355969	1
RAB38	1.53231	5.85e-17	2.21e-15	1
ENTPD7	-0.452098	1.59e-05	5.63e-05	1
ITSN1	0.663416	2.86e-16	9.42e-15	1
EHBP1L1	0.66409	2.26e-08	1.38e-07	1
MUC2	-2.27089	3.31e-09	2.38e-08	1
FST	0.891343	2.19e-05	7.54e-05	1
TIGD2	-0.354996	4.2e-07	2.01e-06	1
PREX2	0.689644	1.18e-05	4.29e-05	1
ASTN2	-0.764001	5.25e-07	2.46e-06	1
GPATCH8	0.159996	0.0266861	0.0459857	1
KIF4A	-1.58126	8.94e-15	2.1e-13	1
ZMYM5	0.149377	0.0289235	0.0493201	1
TMEM189	0.359946	1.58e-06	6.74e-06	1
PECR	0.300127	0.00621521	0.0125572	1
DPYSL4	-0.841896	0.000905737	0.00222427	1
XAF1	0.515759	0.0214697	0.0379115	1
RAB11FIP4	-0.298966	0.000183961	0.000523153	1
NEGR1	0.853411	1.19e-05	4.31e-05	1
INPP5B	0.592932	2.69e-16	8.93e-15	1
NCK2	0.124593	0.0208041	0.0368632	1
TAF1D	-0.592963	2.14e-11	2.42e-10	1
KIAA0368	-0.381451	8.67e-12	1.07e-10	1
MCM5	0.186835	0.00385379	0.00822344	1
BTBD10	0.166795	0.000337841	0.000910194	1
MAP6	0.444812	2e-05	6.98e-05	1
NYAP1	1.16408	7.32e-13	1.14e-11	1
PPP6R2	-0.37233	1.28e-08	8.2e-08	1
ZBTB7C	1.29358	9.61e-12	1.17e-10	1
ITGA2	0.887154	7.23e-09	4.87e-08	1
THEG	-0.848499	3.26e-05	0.000108803	1
SGSM3	-0.471319	2.17e-07	1.09e-06	1
C19orf44	0.181087	0.00290206	0.00637871	1
NIPA2	-0.306264	0.00267945	0.00592974	1
RAVER1	-0.25735	0.0191901	0.0343969	1
C6orf120	-0.248534	0.000570706	0.00146701	1
CLCNKB	1.88441	8.71e-19	4.83e-17	1
ZNF3	-0.34784	8.15e-09	5.43e-08	1
HMGXB4	-0.27786	0.000303238	0.0008242	1
TRIM16	0.63502	1.33e-11	1.58e-10	1
DPP6	0.974152	0.00404651	0.00859389	1
STK39	-0.771641	1.89e-09	1.43e-08	1
HMBS	-0.295785	0.00076094	0.00190137	1
KLHDC1	0.531519	1.13e-08	7.26e-08	1
RNF217-AS1	0.828296	1.13e-10	1.11e-09	1
MCF2L	-0.520035	3.19e-09	2.3e-08	1
ACSS3	1.15008	3.17e-11	3.48e-10	1
PLBD2	-0.491496	1.24e-10	1.2e-09	1
ALDH1L1	0.535831	0.0288309	0.049185	1
PPP1R15A	0.421559	0.00549196	0.0112564	1
NLGN4X	0.697258	0.00490844	0.010193	1
RPE	0.12721	0.0236378	0.0412928	1
HEATR5A	-0.231966	0.00858537	0.0167437	1
SLC35F5	-0.446429	7.25e-07	3.3e-06	1
EMB	-0.971235	1.12e-17	4.98e-16	1
ATP2C2	-0.664122	8.86e-05	0.000268196	1
CKMT1B	-0.536374	0.0123813	0.0231849	1
PCDHB14	-0.274496	0.0252224	0.0437787	1
UBN1	-0.274435	1.44e-07	7.52e-07	1
PRMT5	-0.254364	0.000107539	0.000320409	1
ETV3	0.277238	0.000857537	0.00211747	1
RIPK3	0.97571	2.72e-09	1.99e-08	1
OLFM4	1.44448	0.00606126	0.0122892	1
EPC2	0.185123	0.00706101	0.014064	1
SNX18	0.269078	0.000165708	0.000476837	1
SDF4	-0.249936	0.000169165	0.000485497	1
AKT2	-0.121779	0.00308556	0.00673785	1
EGFR	0.353423	0.000439456	0.00115492	1
ACOT11	1.22177	2.17e-12	3.04e-11	1
TMX3	-0.149654	0.0229994	0.0402922	1
DNPEP	-0.181428	0.000458121	0.00120021	1
CFL2	1.17538	4.05e-19	2.37e-17	1
NAP1L5	0.497664	0.000159329	0.00045984	1
ZHX2	-0.154468	0.00636097	0.0128179	1
LRRC49	0.39519	1.62e-07	8.38e-07	1
AGL	0.224124	0.00283585	0.00624361	1
MIR99AHG	0.523024	0.000730853	0.00183515	1
SRRM5	-0.300787	0.00797095	0.0156752	1
PSD4	-0.529753	5.65e-12	7.26e-11	1
TRIM11	-0.41618	3.78e-09	2.69e-08	1
TBL1XR1	-0.385586	1.07e-05	3.91e-05	1
TACSTD2	-0.483834	1.67e-05	5.88e-05	1
BCAT2	-0.57883	5.58e-08	3.15e-07	1
MFN1	-0.158888	0.0177106	0.032019	1
TXNRD1	0.227589	0.00989159	0.0190075	1
CDC45	-0.931621	2.17e-07	1.09e-06	1
USP33	-0.203174	0.00422896	0.00893501	1
FAM184A	0.526864	0.000103433	0.000309274	1
ABHD8	0.486841	1.91e-07	9.77e-07	1
PIWIL2	0.754305	0.000122027	0.000360025	1
NCL	-0.340097	8.66e-12	1.07e-10	1
GUF1	-0.399658	1.12e-10	1.1e-09	1
SYT11	0.77059	1.1e-06	4.85e-06	1
FBXL17	0.192612	0.0116334	0.0219337	1
HTRA1	0.6553	1.51e-08	9.55e-08	1
LRMP	1.25172	2.03e-13	3.56e-12	1
ZNF585A	0.216215	4.57e-05	0.000147288	1
KIAA0895	-0.291828	0.0012911	0.00307317	1
KANSL3	0.338715	6.77e-16	2.04e-14	1
HDAC11	0.16089	0.0191154	0.0342865	1
EN2	-2.1957	5.61e-08	3.17e-07	1
HBB	1.26303	1.51e-07	7.85e-07	1
CANT1	-0.816691	3.85e-18	1.83e-16	1
SNX22	-0.784734	1.33e-05	4.78e-05	1
FGF10	1.34425	3.9e-07	1.87e-06	1
POLE	-0.27362	6.21e-06	2.38e-05	1
LRCH1	0.301382	0.00065574	0.00166286	1
ZCCHC2	-0.33781	5.4e-05	0.000171197	1
CLIP3	1.24732	2.33e-13	4.02e-12	1
PRDM5	0.834703	2.41e-10	2.21e-09	1
ZNF830	-0.145875	0.00230304	0.0051807	1
SH3BP1	0.905019	3.77e-12	5.02e-11	1
SIM2	-3.10503	2.64e-55	4.87e-51	1
GJC1	1.01323	5.71e-10	4.81e-09	1
C20orf194	0.882659	8.16e-15	1.92e-13	1
DMD	1.28167	3.02e-11	3.33e-10	1
KCNC2	-1.2623	0.00941255	0.0181742	1
SSH3	0.597566	2.04e-14	4.44e-13	1
PER1	0.662941	4.89e-05	0.000156271	1
KLC2	-0.191695	0.0034886	0.00752874	1
AIFM3	0.991039	7.24e-10	5.95e-09	1
CAV2	1.37106	9.03e-19	4.98e-17	1
MED26	-0.196143	7.43e-05	0.000228636	1
AKR7L	-0.583144	0.000522454	0.00135298	1
BTD	-0.307742	0.000437633	0.00115079	1
ZNF689	0.181644	0.000550381	0.00141967	1
RPL31	-0.351906	9.89e-05	0.000296963	1
SLC25A51	-0.153852	0.0143406	0.0264817	1
MARS2	-0.668222	2.07e-10	1.92e-09	1
PSPC1	-0.17044	0.000299246	0.000813589	1
PDK3	0.330405	0.00179495	0.00413467	1
ZSCAN20	0.821731	5.06e-06	1.97e-05	1
MYO1D	-0.470744	7.47e-10	6.12e-09	1
SYNM	1.43271	2.01e-10	1.87e-09	1
SESTD1	0.480312	1.26e-09	9.89e-09	1
KAZN	0.49187	8.92e-08	4.86e-07	1
CHPF	-0.328305	0.00282226	0.00621665	1
DDX56	-0.219895	0.000531403	0.00137422	1
AOX1	2.03945	3.87e-19	2.28e-17	1
EEA1	0.180925	0.0283964	0.048515	1
RELL2	-0.660619	4.29e-07	2.05e-06	1
MAB21L1	0.80923	0.00997054	0.0191413	1
SLC38A11	-1.28101	6.71e-06	2.55e-05	1
SHMT2	-0.572042	3.71e-10	3.25e-09	1
RCBTB2	0.657618	1.36e-13	2.45e-12	1
ST6GALNAC1	-0.98734	9e-06	3.34e-05	1
ARL6	0.226206	0.00117511	0.00282003	1
MYB	-0.846969	4.35e-07	2.07e-06	1
ESPL1	-0.671796	0.000102966	0.000308079	1
RPTOR	0.24494	1.8e-05	6.32e-05	1
GPHN	-0.162183	0.00496208	0.0102882	1
CHST8	-0.798343	0.000226146	0.000632288	1
SLTM	-0.107575	0.00460271	0.00963215	1
NID1	0.785647	1.49e-06	6.36e-06	1
TUBGCP3	0.234543	3.38e-06	1.36e-05	1
ZNF783	-0.403725	9.56e-07	4.25e-06	1
DSP	-0.332713	0.000449576	0.00117933	1
ZNF248	0.239717	0.000115941	0.000343444	1
TBC1D31	-0.231475	0.0166264	0.0302429	1
FKBP7	0.480337	2.86e-09	2.08e-08	1
ATAD2B	-0.2469	0.000970186	0.00236829	1
MECP2	0.310612	2.4e-09	1.77e-08	1
TOP3B	-0.35872	0.0205827	0.0365378	1
YBX2	1.06425	7.49e-07	3.4e-06	1
ATOH1	-2.45382	2.01e-06	8.45e-06	1
FAM192A	0.116582	0.0215539	0.0380529	1
GALNT13	0.955826	0.00224987	0.00507474	1
ZRANB3	-0.233556	0.000992351	0.00241604	1
KRT13	3.10994	4.17e-09	2.94e-08	1
ATP6V0B	-0.304461	0.000828191	0.00205051	1
ZBTB38	0.486632	1.76e-07	9.04e-07	1
FYCO1	0.32265	0.000232627	0.000648604	1
PLTP	0.406673	0.0219113	0.0386356	1
CTIF	0.404634	9.57e-07	4.25e-06	1
DNASE1L3	1.02576	3.91e-07	1.88e-06	1
PPP1R8	0.0784159	0.0221778	0.0390533	1
CCSER1	-0.352989	0.00157179	0.00367296	1
SECISBP2	-0.40624	1.06e-13	1.97e-12	1
HDDC3	-0.251804	0.00296727	0.00650498	1
SND1	-0.545887	2.94e-13	4.99e-12	1
N4BP2	-0.3243	0.00144484	0.00340262	1
OVGP1	-0.850045	5.52e-07	2.57e-06	1
ARL4C	0.799864	4.81e-09	3.35e-08	1
UBQLNL	0.482191	0.00795767	0.0156554	1
LSG1	0.136561	0.0056331	0.0115111	1
PLEKHG2	0.314471	0.00761216	0.0150415	1
KIFC1	-0.886351	1.19e-08	7.62e-08	1
CYP4F3	1.94344	7.99e-15	1.89e-13	1
RNF103	-0.236193	8.03e-05	0.000245193	1
AHCY	-0.341124	7.39e-06	2.78e-05	1
ALG12	-0.186252	0.00718698	0.0142856	1
THSD1	0.365923	0.00388253	0.00827615	1
TMEM8A	-0.529691	3.75e-08	2.2e-07	1
DNAH1	-0.577977	6.76e-07	3.09e-06	1
LLGL1	0.212998	0.001663	0.00386355	1
CDH17	1.30902	3.77e-07	1.82e-06	1
FAAH	-0.833708	7.23e-11	7.39e-10	1
TM7SF2	-0.773413	2.56e-09	1.88e-08	1
ACCS	-0.477118	0.000199727	0.000563813	1
PDE9A	-0.541585	3.27e-05	0.00010914	1
EPS8L1	-0.532158	5.04e-05	0.000160862	1
ANXA6	1.14614	2.93e-16	9.62e-15	1
MFSD2A	2.43231	1.28e-22	1.67e-20	1
RAPGEF1	0.143602	0.0261448	0.0451628	1
HOGA1	1.89086	7.27e-19	4.1e-17	1
PLA2G4A	1.32965	4.69e-16	1.47e-14	1
HLA-DMB	-1.25157	7.69e-07	3.48e-06	1
SCD	-0.625981	0.0050129	0.0103788	1
UBXN10	1.64242	1.76e-12	2.52e-11	1
SYNJ2	-0.448894	1.22e-07	6.46e-07	1
MAD1L1	-0.249701	0.00882339	0.0171607	1
NOP16	-0.588479	9.02e-10	7.24e-09	1
CAP1	0.251515	1.08e-08	7e-08	1
EGFLAM	0.594308	0.000104257	0.000311487	1
TMEM214	-0.195146	0.00200009	0.00456669	1
ATG4D	-0.169423	0.00823348	0.0161377	1
WDR4	-0.326185	3.99e-05	0.000130387	1
HEXB	-0.397061	0.000265792	0.000731047	1
TNKS	0.182539	0.0205368	0.0364703	1
SLC35G1	0.371835	0.00139807	0.00330388	1
ABI3BP	0.589415	0.00149472	0.00351067	1
SLC30A4	-0.927857	1.19e-07	6.34e-07	1
RUNDC3B	0.44924	0.000982137	0.00239323	1
IL17RB	-0.649957	1.25e-11	1.5e-10	1
PFKM	0.227523	0.0182272	0.0328403	1
DKC1	-0.474173	2.12e-16	7.16e-15	1
PRPSAP1	-0.204782	0.000363898	0.000973988	1
UBD	-0.866995	0.00135434	0.00320753	1
TMEM40	2.25571	3.37e-11	3.67e-10	1
BRINP1	0.818383	0.00216015	0.00489509	1
C8orf34	-0.419861	0.0233227	0.0407849	1
OMA1	-0.231582	0.000339253	0.000913333	1
SULT4A1	-1.46109	0.000379519	0.00101198	1
MTUS1	0.264412	0.00164095	0.00381858	1
PLEKHF2	0.364509	0.000262469	0.000722877	1
GTF3C2	-0.154425	0.000288143	0.000785257	1
CNOT10	-0.218536	1.23e-07	6.54e-07	1
ATL3	0.164317	0.0180768	0.0326071	1
F8	0.238474	0.0173725	0.0314695	1
DFNA5	0.850769	9.79e-12	1.19e-10	1
PRICKLE2	1.25472	3.8e-15	9.75e-14	1
KANSL1L	0.385794	7.82e-06	2.93e-05	1
FAM120C	0.24193	0.00033045	0.000892107	1
SUCLG1	0.283229	2.31e-07	1.16e-06	1
WDR47	0.432913	1.94e-08	1.2e-07	1
GFM2	-0.224708	0.00239573	0.00536694	1
PRDM11	0.856407	4.31e-20	3.1e-18	1
DIRAS3	0.80929	1.42e-06	6.11e-06	1
ACSS1	-0.844076	4.7e-20	3.34e-18	1
P4HA2	0.688953	1.5e-11	1.75e-10	1
B3GALT4	0.571324	1.36e-07	7.12e-07	1
B3GNT8	1.74449	8.3e-20	5.52e-18	1
SAP130	-0.15854	0.00290275	0.00637948	1
TPRG1	1.3047	1.04e-16	3.74e-15	1
ITGA2B	0.772254	9.36e-07	4.17e-06	1
ZNF512	0.281854	0.0120117	0.0225685	1
SDAD1P1	0.420759	2.38e-05	8.17e-05	1
CCNL1	-0.26338	0.0113418	0.0214652	1
SERPINE2	0.460649	0.00304421	0.00665702	1
DNASE2	0.383534	5.9e-05	0.000185188	1
TCN1	0.922066	0.0226635	0.0398097	1
PYGL	0.967654	6.59e-08	3.67e-07	1
SNPH	1.1532	3.9e-12	5.16e-11	1
NOD1	0.328633	0.000622975	0.00158632	1
AKAP1	-0.230048	0.000634454	0.00161287	1
LPA	0.785875	0.000598343	0.00152961	1
COL4A4	0.549293	0.00227541	0.00512859	1
TPP1	-0.213789	0.00307453	0.00671536	1
DNMBP	-0.25701	0.00321621	0.00699331	1
HSPA9	-0.239286	3.84e-05	0.000126014	1
MYO15A	0.576828	3.84e-06	1.53e-05	1
AP1G2	-0.51561	2.39e-08	1.45e-07	1
GRIK5	0.851549	6.74e-09	4.56e-08	1
ZNF766	-0.177885	0.000136858	0.000399813	1
PTPN21	0.403065	3.77e-06	1.5e-05	1
CYP2D7	-0.477597	0.0190663	0.0342051	1
ZNF773	-0.198286	0.000225035	0.00062966	1
TP53INP1	-1.12815	1.6e-20	1.28e-18	1
BAZ2A	-0.228353	0.00331022	0.00718333	1
PHYHIPL	1.94715	5.11e-21	4.66e-19	1
DPH2	-0.534473	4.61e-15	1.16e-13	1
COG5	-0.312074	0.000595615	0.00152381	1
NGLY1	-0.26636	7.78e-07	3.52e-06	1
ASB6	0.119809	0.00611128	0.0123761	1
CLEC1A	0.406348	0.00513081	0.0105844	1
PATZ1	-0.286928	0.000342039	0.000919892	1
PAQR5	1.40033	2.21e-20	1.71e-18	1
CCL28	0.627549	0.000194435	0.000550224	1
SMU1	0.0960824	0.00621589	0.0125572	1
EPM2A	0.70751	2.03e-15	5.49e-14	1
UBE4B	-0.15127	0.00331336	0.00718843	1
NFATC2	0.51642	0.000266234	0.000732152	1
NFATC2IP	-0.0877869	0.0282374	0.0482931	1
FGD5	0.513549	0.000169739	0.000487068	1
NOS1AP	0.390367	0.0088797	0.0172556	1
PRMT3	-0.234643	0.000391479	0.00104101	1
COL17A1	2.14686	1.57e-10	1.49e-09	1
PCDH9	1.17545	4.05e-09	2.86e-08	1
C18orf25	0.163538	0.00585214	0.0119032	1
GLB1L3	-0.801696	0.0121597	0.0228093	1
EXTL1	0.630151	0.00161073	0.00375681	1
MATN2	0.81942	2.69e-07	1.33e-06	1
ST6GALNAC2	1.56937	2.1e-17	8.83e-16	1
MSLN	2.42465	5.7e-13	9.1e-12	1
DDX60L	-0.302636	0.00692636	0.0138227	1
CIT	-0.542476	5.05e-05	0.000161125	1
ZNF607	-0.272363	4.57e-06	1.8e-05	1
ATP6V0D2	1.6136	2.47e-08	1.5e-07	1
ITGA9	0.953632	4.79e-09	3.34e-08	1
ZFR	0.166073	0.00348602	0.00752407	1
KIAA1328	0.145998	0.0293351	0.0499342	1
HEMK1	-0.181303	0.00862693	0.0168105	1
CTPS2	-0.191569	0.000339728	0.000914344	1
PGBD2	-0.121044	0.0282777	0.0483441	1
KRT5	2.14332	2.88e-07	1.42e-06	1
MORC2	-0.269289	3.41e-10	3.01e-09	1
ZFP69	0.296351	0.0112064	0.0212472	1
HIST2H2BF	-0.914019	3.16e-05	0.000105828	1
DSN1	0.275576	9.94e-06	3.66e-05	1
HDGF	-0.208858	0.00011429	0.00033888	1
MAP4K4	-0.386731	2.26e-08	1.38e-07	1
DOCK3	1.34893	9.53e-16	2.78e-14	1
TBCD	-0.350175	8.5e-09	5.64e-08	1
PEG10	1.71008	1.1e-10	1.09e-09	1
GSDMD	0.560968	0.00110933	0.00267469	1
DPAGT1	-0.394327	2.26e-09	1.68e-08	1
TRPS1	0.579483	1.34e-06	5.79e-06	1
C1orf116	-1.19056	1.42e-20	1.16e-18	1
MTMR3	-0.286358	8.54e-06	3.18e-05	1
RASA3	0.266441	0.010749	0.0204653	1
TMEM168	-0.236673	0.00131899	0.00313387	1
ADCY9	0.73134	1.78e-11	2.04e-10	1
ZNF600	0.302922	6.57e-05	0.000203914	1
SCN9A	0.672642	0.00144047	0.00339291	1
ATF7IP2	0.774493	0.000577186	0.00148119	1
NBPF15	-0.582032	0.000233083	0.000649712	1
2019-09-08	0.230035	0.000251916	0.000696312	1
CCDC88A	0.736655	1.08e-08	6.98e-08	1
H2AFY	-0.229969	4.02e-05	0.000131293	1
RXRB	0.112387	0.000620472	0.00158126	1
PINK1	0.317595	0.00011449	0.000339362	1
WASF1	-0.421765	3.51e-05	0.00011641	1
ITPK1	0.405298	1.1e-06	4.83e-06	1
NAALAD2	0.820593	6.87e-06	2.6e-05	1
G3BP1	-0.25674	4.76e-06	1.86e-05	1
CYP39A1	-0.665743	2.98e-06	1.22e-05	1
TMEM139	1.53411	1.3e-15	3.65e-14	1
RBM15	-0.190114	0.000394843	0.00104904	1
STK32C	-0.607283	1.38e-09	1.07e-08	1
IMP4	-0.190063	0.00445176	0.00935321	1
NWD1	-1.09099	1.55e-16	5.38e-15	1
AES	0.292684	1.54e-05	5.47e-05	1
PPP1R13B	-0.281614	7.19e-06	2.71e-05	1
CEACAM6	0.726314	0.0241606	0.0421301	1
RCL1	-0.209851	0.000770179	0.00192211	1
SUSD2	0.510487	0.00377541	0.00807302	1
ATG2B	-0.235976	0.000720514	0.00181215	1
COL9A2	-1.31606	8.51e-06	3.17e-05	1
TLR1	0.804106	1.79e-05	6.29e-05	1
CPNE5	0.950109	6.53e-08	3.65e-07	1
GOLGA3	-0.311393	1.22e-08	7.85e-08	1
SCUBE3	0.841438	1.8e-06	7.6e-06	1
RBPJ	0.261516	1.18e-05	4.3e-05	1
GIMAP1	0.370446	0.00492335	0.0102205	1
ALDH18A1	-0.390196	3.13e-08	1.86e-07	1
RASGRF1	1.51554	1.42e-12	2.07e-11	1
DAPK3	0.214383	0.0140465	0.0260124	1
ZSCAN16	-0.532134	1.99e-11	2.26e-10	1
RWDD4	-0.237864	1.06e-05	3.91e-05	1
SBNO2	-0.384884	6.87e-05	0.000212518	1
PPP1R9A	-0.896355	1.93e-19	1.22e-17	1
BCAM	-1.08709	2.66e-16	8.86e-15	1
PCK2	0.305959	0.00074686	0.00187024	1
EDNRA	1.05613	1.12e-09	8.87e-09	1
ZNF331	0.220997	0.01131	0.0214181	1
FUCA2	-0.403491	2.14e-07	1.08e-06	1
PIK3AP1	-0.59838	4.31e-06	1.71e-05	1
RGL1	0.65852	2.82e-07	1.39e-06	1
ACTC1	2.67687	2.77e-12	3.78e-11	1
ZNF549	-0.233994	2.98e-05	0.000100368	1
CLSTN2	0.958508	0.00381916	0.00815615	1
ZNF79	0.109025	0.0174965	0.0316724	1
HSPA8	-0.319287	0.000815736	0.00202456	1
COG3	-0.317508	0.000238321	0.00066241	1
PRRG1	0.694263	2.7e-07	1.34e-06	1
C15orf59	1.62685	1.05e-19	6.92e-18	1
RHOBTB2	0.76302	3.27e-16	1.06e-14	1
IL27RA	0.581401	1.19e-05	4.32e-05	1
IL5RA	-1.02455	0.00989975	0.0190212	1
FOCAD	-0.332259	1.2e-05	4.36e-05	1
MTR	0.259217	0.000364481	0.000975407	1
FN1	0.880664	6.9e-06	2.61e-05	1
ZNF425	0.353229	1.13e-05	4.14e-05	1
GANC	0.158018	0.00621895	0.0125606	1
CHRNA2	-1.77957	2.61e-10	2.37e-09	1
DGKD	-0.752749	3.11e-16	1.01e-14	1
SORCS2	0.659508	0.00052352	0.00135555	1
FAM83H	-0.727791	4.94e-13	7.98e-12	1
RPS6KA6	-0.297577	0.00153006	0.00358545	1
AURKB	-0.913351	3.57e-07	1.72e-06	1
IFI16	0.80083	5.12e-08	2.92e-07	1
DISC1	-0.705129	3.22e-07	1.57e-06	1
CAPN6	1.56031	1.16e-06	5.06e-06	1
MTHFD1	-0.263746	7.71e-05	0.000236161	1
SYTL4	0.517415	2.14e-07	1.08e-06	1
BCKDK	-0.160562	0.0114822	0.0216886	1
PXN	-0.284014	0.000208967	0.000587736	1
ATP8B4	0.708652	0.00355837	0.00766674	1
PAX1	-2.57788	7.66e-08	4.22e-07	1
SGK1	1.26034	3.51e-07	1.7e-06	1
LRBA	-0.494045	3.39e-06	1.37e-05	1
DSE	0.744734	2.24e-11	2.52e-10	1
PANK1	0.556833	0.000282445	0.000771324	1
PTGS2	1.71021	3.8e-09	2.7e-08	1
MAP1A	1.17307	6.31e-11	6.54e-10	1
NELFCD	-0.331941	1.27e-09	9.95e-09	1
EME2	-0.723356	3.84e-06	1.53e-05	1
TMEM69	-0.309326	1.97e-07	1e-06	1
ANKRD17	-0.208088	0.0139157	0.0257882	1
NCKAP5L	0.609968	8.05e-07	3.64e-06	1
NACA	-0.244344	0.000836451	0.00206929	1
FAM107B	0.399322	0.00100074	0.00243359	1
DENND2A	0.612716	6.25e-05	0.000195125	1
MXRA5	0.606097	0.000317647	0.000860824	1
GEMIN4	-0.491465	1.53e-08	9.63e-08	1
HIPK3	0.290045	4.59e-05	0.000147848	1
XPOT	-0.458981	1.22e-09	9.58e-09	1
CRAT	-0.623058	8.55e-07	3.84e-06	1
SLC19A1	-1.4818	4.81e-35	5.91e-32	1
ACAA2	0.939975	1.52e-12	2.21e-11	1
WWOX	0.236701	0.00951335	0.0183573	1
KNOP1	-0.192899	0.00234543	0.00526131	1
HUNK	1.48592	1.49e-12	2.17e-11	1
ZBTB4	0.431928	3.41e-11	3.71e-10	1
B4GALT4	0.132218	0.0265359	0.0457654	1
CHD1L	-0.489883	1.66e-13	2.93e-12	1
FUT8	0.346951	6.55e-05	0.000203594	1
AGA	-0.301484	0.000337369	0.000909323	1
MMP12	-0.956644	0.00565927	0.0115509	1
CARD16	0.852185	1.53e-08	9.61e-08	1
ZNF862	-0.327105	0.00117084	0.00281086	1
BBX	0.65495	5.45e-13	8.72e-12	1
TNRC6B	-0.246661	0.000338915	0.000912556	1
AJAP1	0.49203	0.0237783	0.0415264	1
SYP	-0.412271	0.022878	0.0401251	1
SLC25A42	-0.864686	5.21e-17	1.99e-15	1
GALNT15	0.729062	8.45e-05	0.000256937	1
C3orf62	-0.329919	6.32e-07	2.91e-06	1
VPS29	0.231649	1.5e-06	6.42e-06	1
RAB24	-0.328092	0.00281086	0.00619525	1
ARHGAP20	1.37577	1.28e-11	1.52e-10	1
CCDC174	0.153741	4.3e-05	0.000139284	1
INPPL1	-0.320633	3.53e-11	3.83e-10	1
DIAPH3	-1.16054	2.6e-10	2.36e-09	1
ADARB1	-0.195472	0.00766905	0.0151458	1
COL4A2	0.586279	0.000125227	0.000368697	1
TCF7L1	1.2408	8.13e-18	3.71e-16	1
ZNF835	0.700016	0.000543756	0.00140282	1
SEC16A	-0.849515	2e-25	4e-23	1
NEK5	-1.92791	1.45e-25	3.04e-23	1
ALG10B	-0.230808	0.00201363	0.00459531	1
ZNF365	0.549525	0.00138018	0.00326496	1
TLN2	-0.318401	0.0104162	0.0199036	1
SCGB1A1	2.36576	1.29e-06	5.58e-06	1
CYP2S1	0.897585	1.26e-07	6.67e-07	1
FNIP2	-0.849687	4.91e-09	3.41e-08	1
RNF216	0.219233	6.33e-06	2.41e-05	1
UGGT2	-0.232169	0.00125329	0.00299322	1
OXSM	-0.376732	1.28e-08	8.21e-08	1
EIF3A	-0.245148	0.0013683	0.00323852	1
KIF12	-0.529544	0.0274691	0.0471147	1
DAZAP2	0.180853	7.62e-05	0.000233674	1
ADAMTS15	0.769264	1.21e-06	5.25e-06	1
HOXD10	1.14147	1.92e-07	9.81e-07	1
KIF17	0.86452	2.66e-10	2.4e-09	1
SIRPA	0.61796	1.48e-08	9.36e-08	1
POLDIP2	-0.138157	0.0114547	0.0216455	1
ANKHD1	-0.161369	0.0199919	0.0356468	1
SLC25A27	-0.969327	1.6e-08	1e-07	1
WDR77	-0.267128	4.63e-05	0.000148997	1
QTRT1	-0.51673	2.86e-07	1.41e-06	1
TNKS1BP1	-0.14931	0.0130389	0.0243077	1
CD74	0.376158	0.00938135	0.0181215	1
HELB	-0.535743	3.44e-08	2.03e-07	1
SLC35E1	-0.470062	5.12e-12	6.62e-11	1
DNAJC8	0.21399	1.83e-07	9.38e-07	1
HDAC8	-0.185103	4.61e-05	0.000148551	1
SRP54	-0.231242	0.000119702	0.000353676	1
JADE2	0.585766	1.63e-10	1.54e-09	1
ZNF423	0.701196	9.42e-06	3.49e-05	1
SEMA6D	1.62935	3.22e-17	1.29e-15	1
EXTL3	0.291387	0.000202087	0.000570127	1
HYLS1	-0.342071	2.11e-05	7.3e-05	1
MCMDC2	-0.933565	5.05e-16	1.56e-14	1
CDK5RAP3	-0.348258	7.86e-05	0.000240517	1
ROBO3	0.580489	0.000765887	0.00191243	1
HTATSF1	0.167905	0.000127136	0.000373842	1
POP1	-0.244423	0.00075103	0.00187967	1
CELF2	0.767431	1.73e-06	7.33e-06	1
SLITRK2	1.49722	1.08e-06	4.74e-06	1
NRIP2	0.301613	0.00119222	0.00285773	1
SLC25A10	-0.812239	1.79e-10	1.68e-09	1
TBC1D7	-0.310965	6.87e-05	0.000212518	1
MKI67	-1.6758	1.79e-19	1.14e-17	1
KANK2	1.03064	6.15e-14	1.2e-12	1
SPAG8	0.382595	0.00267216	0.00592044	1
GINM1	0.269676	3.8e-07	1.83e-06	1
IQSEC3	1.21211	4.07e-08	2.36e-07	1
AKR1C1	0.918726	1.56e-05	5.52e-05	1
OLFML3	0.576715	0.000645533	0.00163878	1
ATP10D	0.499704	3.65e-05	0.000120382	1
LCP1	-0.714277	1.15e-06	5.01e-06	1
RHPN2	-1.01408	1.75e-14	3.86e-13	1
PTGR2	-0.200372	0.00637569	0.0128406	1
LAP3	-0.204112	0.00205782	0.00468515	1
PPIC	0.95102	1.58e-13	2.79e-12	1
PRKACA	0.294675	1.27e-08	8.11e-08	1
PNPLA7	-0.957133	1.39e-14	3.12e-13	1
ANO8	-0.418332	6.76e-07	3.09e-06	1
VRK3	-0.136395	0.024499	0.0426476	1
RBM15B	-0.394135	7.51e-14	1.45e-12	1
NPY4R	-1.91427	1.42e-07	7.43e-07	1
ITGA7	0.774731	8.13e-06	3.04e-05	1
RSPO3	0.948788	0.000145262	0.000421957	1
TPST1	0.310432	0.00230858	0.00518937	1
FAM111B	-1.27267	5.36e-10	4.53e-09	1
SBNO1	0.152751	0.0173415	0.0314289	1
RSL1D1	-0.254433	6.05e-05	0.000189446	1
PLEKHA5	0.278916	0.000343674	0.00092402	1
TTLL5	0.22317	0.000178855	0.000510208	1
SPTBN4	-0.346811	0.00471124	0.00982335	1
EPHA8	-2.84722	1.63e-18	8.57e-17	1
BACH2	0.522202	0.000683117	0.00172479	1
PPP2R3A	0.532517	2.34e-10	2.15e-09	1
PPARGC1B	1.01486	9.93e-13	1.5e-11	1
RBM28	-0.124035	0.0101967	0.0195165	1
GIGYF1	-0.212865	0.00295145	0.00647337	1
ERC1	0.4057	6.86e-07	3.13e-06	1
AOC2	-0.530606	0.000123674	0.000364417	1
SPHK2	-0.232392	0.00154208	0.00360947	1
LETMD1	-0.241761	2.74e-05	9.28e-05	1
CD3EAP	-0.641203	2.72e-16	9.03e-15	1
B3GNT2	0.314146	0.00164758	0.00383159	1
FAM212A	1.65916	3.64e-18	1.75e-16	1
EYA2	0.28513	0.00839825	0.0164239	1
EFS	1.32525	7.48e-11	7.63e-10	1
ZNF652	-0.644502	2.26e-11	2.55e-10	1
TRIM68	-0.77351	6.41e-09	4.36e-08	1
SCN3B	0.576438	0.00653001	0.013117	1
OAT	0.838617	4.39e-09	3.08e-08	1
HYAL3	-0.338859	0.000681443	0.00172117	1
ANKS1A	0.286619	2.03e-06	8.5e-06	1
HPN	-2.73266	4.88e-39	1.29e-35	1
KLK14	-0.717514	0.0267556	0.0460882	1
SEC23B	-0.44963	1.9e-06	7.99e-06	1
GOLM1	-2.35928	1.78e-36	2.98e-33	1
DPYSL2	0.668745	2.09e-07	1.06e-06	1
SYNPO2	1.44769	1.39e-10	1.33e-09	1
MTHFR	-0.470583	1.05e-06	4.64e-06	1
ADAMDEC1	-0.859756	0.001622	0.00378165	1
PLK3	0.630894	1.92e-05	6.69e-05	1
DICER1	-0.245653	0.00356829	0.00768633	1
FOLH1	-2.51889	2.66e-20	2.03e-18	1
MAPKAP1	0.135228	0.000358356	0.000960411	1
CYFIP1	-0.214893	0.000280679	0.000766955	1
SOCS6	0.295738	8.26e-05	0.000251323	1
RAB37	0.472257	0.000935052	0.00228955	1
FRRS1L	1.07493	3.87e-06	1.54e-05	1
GREB1	-1.02892	8.98e-07	4.02e-06	1
LMBRD1	0.239568	0.000234873	0.000653811	1
PRPF19	-0.235239	1.01e-05	3.72e-05	1
RPA2	0.282195	1.67e-07	8.62e-07	1
CSF1	0.499458	4.04e-05	0.000132037	1
MXD4	-0.331454	5.48e-06	2.12e-05	1
DTX3L	-0.620809	8.36e-13	1.29e-11	1
FEM1B	0.494801	9.92e-19	5.44e-17	1
ACOX1	-0.181313	0.00219443	0.00496488	1
CLPTM1	-0.205331	0.00110075	0.00265679	1
EFHD1	1.07017	9.35e-11	9.35e-10	1
GPI	-0.290516	4.08e-05	0.000133027	1
AGPAT3	-0.440557	1.39e-12	2.03e-11	1
SWT1	-0.259718	0.000752641	0.00188293	1
CPSF7	-0.127488	0.00462628	0.00967246	1
CDH2	1.33659	1.85e-06	7.81e-06	1
PTPRB	0.342683	0.0100052	0.0191897	1
ARID5B	-0.405299	5.64e-06	2.18e-05	1
TENM2	0.941771	3.11e-06	1.27e-05	1
BBS10	0.225692	0.00424186	0.00896022	1
PPIG	0.151171	0.00900628	0.0174721	1
RPSA	-0.236878	0.0162195	0.0295963	1
PLXNC1	0.353863	0.0136246	0.0253125	1
MGAT5B	-1.33634	3.24e-08	1.92e-07	1
FOXJ2	0.347381	4.79e-09	3.34e-08	1
USP9X	0.212382	0.00207225	0.00471438	1
FAM169A	0.654807	0.000143981	0.000418696	1
PARP11	-0.443329	6.36e-08	3.55e-07	1
MCM3	0.383311	2.07e-12	2.92e-11	1
FES	0.702851	3.18e-08	1.88e-07	1
MYOF	1.21951	3.39e-13	5.67e-12	1
TMTC3	0.241669	0.00276069	0.00609488	1
PDE8A	0.172699	0.00309634	0.00675899	1
PPP1R3B	0.428279	3.53e-06	1.42e-05	1
IGHV1-18	-1.09628	0.00512054	0.0105656	1
FGFR2	1.65068	7.86e-13	1.22e-11	1
GPATCH4	-0.362616	3.45e-07	1.67e-06	1
ZGLP1	-0.474043	0.00722869	0.0143561	1
EPRS	-0.238418	0.000665424	0.00168579	1
DISP1	0.255877	0.0104552	0.0199678	1
KIAA1147	-0.439938	6.05e-09	4.13e-08	1
HR	1.12792	2.01e-09	1.51e-08	1
CPT1B	-0.891586	2.05e-07	1.04e-06	1
CLVS2	1.48482	3.43e-07	1.66e-06	1
TBXAS1	-0.586729	2.05e-05	7.11e-05	1
ALDH1B1	0.284295	0.00284445	0.00625956	1
ZNF217	-0.671765	1.2e-07	6.37e-07	1
NOX4	-1.38541	1.48e-09	1.14e-08	1
ACO1	0.313853	2.85e-05	9.61e-05	1
OPRL1	0.365478	0.00107813	0.00260698	1
TULP4	-0.34421	1.07e-06	4.72e-06	1
HAPLN2	1.26811	2.78e-09	2.03e-08	1
AMDHD2	-0.483865	9.39e-09	6.17e-08	1
SPECC1	-0.296998	0.00928778	0.0179615	1
CLCA2	3.12889	1.82e-14	3.99e-13	1
RRBP1	-0.230892	0.00507601	0.0104913	1
TJP1	-0.368024	4.39e-05	0.000142336	1
ZNF599	-0.262916	0.000256065	0.000706844	1
PTPRT	-1.48385	1.35e-05	4.84e-05	1
PER2	0.526775	3.59e-06	1.44e-05	1
TAF4	-0.225939	0.000329069	0.000889032	1
ERI2	-0.190127	0.00426702	0.00900511	1
CXXC5	-0.202057	0.00529391	0.0108892	1
ERCC3	-0.134719	0.00487934	0.0101383	1
RBPMS2	1.06106	1.43e-11	1.68e-10	1
RXFP1	0.651021	0.000392383	0.00104311	1
CCDC151	0.993618	3.59e-09	2.57e-08	1
RAPGEF4	-0.782219	1.29e-06	5.58e-06	1
BMPER	0.790757	0.00337694	0.00730917	1
ZNF813	-0.466308	0.000196493	0.000555706	1
SNAI3	0.280818	0.0229061	0.0401566	1
VIPR2	0.779165	0.000381881	0.00101754	1
ETF1	0.143726	0.00363849	0.0078156	1
SHF	0.81614	2.29e-15	6.16e-14	1
ACSM5	0.864693	2.01e-07	1.02e-06	1
ADGRG6	1.64781	4.63e-13	7.53e-12	1
FAM60A	0.229912	0.00775752	0.0153041	1
SSPO	-1.0393	8.96e-08	4.87e-07	1
CEP57L1	0.156261	0.0191854	0.0343918	1
SLC37A4	0.396085	1.11e-05	4.05e-05	1
SYT1	0.69957	0.0111917	0.0212248	1
RNF207	0.444628	0.00263959	0.00585558	1
ACRV1	-0.867885	0.000371754	0.000992997	1
MYLIP	-0.164009	0.0272513	0.0468021	1
ZNF701	-0.186496	0.00288363	0.00634124	1
MEN1	-0.412163	4.91e-12	6.39e-11	1
TAF6	0.270018	4.97e-05	0.000158751	1
EBAG9	0.207044	0.00125532	0.00299687	1
YPEL4	0.424751	0.00361058	0.00776652	1
ZNF276	-0.414593	2.47e-05	8.45e-05	1
AFF2	1.31648	4.01e-09	2.84e-08	1
CD244	0.760749	2.37e-05	8.12e-05	1
PLXNA2	0.715733	3.77e-10	3.3e-09	1
STXBP5L	1.4553	4.11e-09	2.9e-08	1
NFASC	0.455212	0.00433093	0.0091243	1
CLCA4	2.19025	9.36e-07	4.17e-06	1
PRSS12	1.03703	2.02e-06	8.46e-06	1
PPEF1	-0.711884	0.000182715	0.000519851	1
LOXL2	0.485082	0.000291466	0.000793373	1
PCF11	-0.163734	0.0168384	0.0305833	1
SORBS1	1.20857	2.88e-09	2.09e-08	1
GUCY1A2	0.630964	0.000327173	0.000884429	1
PACSIN1	-0.454784	0.000911281	0.0022355	1
CYGB	0.367378	0.00871111	0.016962	1
FOXA1	-1.78195	7.05e-31	3.78e-28	1
CACNA1A	0.669305	3.63e-05	0.000119671	1
LIMCH1	0.331597	0.000576973	0.00148084	1
ICAM1	-0.495999	0.00324203	0.00704447	1
ZDHHC23	-0.895382	2.16e-19	1.33e-17	1
RANBP17	-0.636326	6.79e-14	1.32e-12	1
BCAS1	-0.930989	4.88e-05	0.000155909	1
EIF3C	-0.40053	2.14e-05	7.42e-05	1
RAB5C	0.203656	0.000168126	0.000482816	1
CCNH	-0.24502	0.00786611	0.0154935	1
USP48	-0.0964008	0.0205127	0.0364416	1
SSTR1	-1.05324	0.000182034	0.000518153	1
RUSC2	0.739455	3e-12	4.06e-11	1
SYCP2	-0.423919	0.00411116	0.00871511	1
NKAPL	1.73433	3.09e-18	1.5e-16	1
YLPM1	-0.149964	0.0098812	0.0189895	1
GNB5	0.717239	3.1e-17	1.25e-15	1
TCF3	-0.342532	5.74e-08	3.24e-07	1
IRGQ	-0.304989	1.04e-06	4.59e-06	1
POTEH	-1.08576	0.000757491	0.00189404	1
RSAD2	0.399937	0.0219376	0.0386746	1
PDK1	-0.188832	0.0283987	0.048515	1
OXSR1	0.148891	0.00530838	0.0109141	1
ANGPTL2	0.782224	1.63e-06	6.93e-06	1
BRPF3	-0.189673	0.0178135	0.0321818	1
SMPDL3B	-2.05381	6.1e-33	4.89e-30	1
MYRIP	-1.38424	6.01e-20	4.15e-18	1
CDK19	-1.00501	5.81e-08	3.27e-07	1
S1PR5	1.64434	1.29e-11	1.53e-10	1
SLC34A2	1.68506	0.000225854	0.000631664	1
SART3	-0.102262	0.0240456	0.0419495	1
TMEM145	-0.845852	0.000122312	0.000360692	1
KIF20A	-1.23361	4.99e-10	4.25e-09	1
NNT	0.648176	4.97e-10	4.24e-09	1
LMX1B	-2.4751	1.42e-20	1.16e-18	1
L3MBTL3	-0.525712	3.36e-10	2.97e-09	1
RPUSD4	-0.332609	2.08e-08	1.28e-07	1
DLGAP2	-1.11187	3.07e-06	1.25e-05	1
IRF8	1.01078	1.23e-07	6.54e-07	1
CEP152	0.288304	0.00444308	0.00933748	1
TLCD1	-1.06458	1.6e-15	4.42e-14	1
MAP7D3	0.72152	1.1e-08	7.09e-08	1
PRDM15	-0.296595	2.13e-08	1.31e-07	1
HEPACAM2	0.600183	0.0207815	0.0368374	1
DUSP16	-0.349244	0.00015058	0.000436166	1
GPR87	2.3536	2.54e-10	2.31e-09	1
FREM1	0.656195	0.000392757	0.0010438	1
TDRD1	-4.56561	3.11e-25	5.9e-23	1
SLC2A9	1.71069	6.91e-27	1.93e-24	1
RANBP2	-0.416136	1.48e-06	6.35e-06	1
MLPH	-0.914735	5.64e-15	1.38e-13	1
SLC4A11	1.13828	1.28e-11	1.52e-10	1
PGM3	-0.518115	8.1e-07	3.65e-06	1
SLC38A7	-0.184779	0.0114272	0.0216068	1
GIT2	0.25874	0.00125932	0.00300527	1
NCAPG	-1.16625	6.34e-10	5.27e-09	1
TIFA	-0.338492	0.00212457	0.0048246	1
ZNF658	0.331626	9.21e-06	3.42e-05	1
GGA2	0.395069	1.43e-13	2.55e-12	1
DPY19L1	0.401376	0.000146119	0.00042431	1
GRIA2	1.0992	6.41e-05	0.000199688	1
ASB2	1.35271	2.22e-10	2.05e-09	1
PCDHB15	0.292514	0.0225568	0.0396562	1
KCNMA1	1.14471	9.8e-11	9.77e-10	1
ATF6B	-0.119116	0.0144473	0.0266502	1
LRRC41	-0.0983145	0.0270185	0.0464898	1
PBX4	0.476432	0.00231506	0.00520203	1
STOX1	0.640172	4.87e-05	0.000155902	1
LDB3	1.52816	2.7e-10	2.43e-09	1
UBAC1	0.406517	1.96e-12	2.78e-11	1
WISP2	1.97542	1.08e-09	8.55e-09	1
DDX5	-0.160295	0.0163368	0.029769	1
SLC26A1	-0.932719	1.15e-14	2.64e-13	1
CCNB1	-0.571567	2.23e-06	9.28e-06	1
ANAPC4	0.36149	5.48e-08	3.1e-07	1
KCNK3	1.31078	7.54e-07	3.42e-06	1
THRAP3	-0.280509	2.32e-08	1.41e-07	1
AK7	0.352494	0.0086842	0.016915	1
SLC12A8	-1.12246	1.55e-25	3.22e-23	1
C9orf43	-0.624248	2.32e-09	1.73e-08	1
DIP2A	-0.703224	4.06e-13	6.69e-12	1
RABGGTA	-0.230837	0.000529419	0.00136928	1
PRKCB	1.52639	1.09e-12	1.62e-11	1
ACSM3	-0.653851	0.000222082	0.000621991	1
ROCK2	0.476592	5.56e-09	3.82e-08	1
SLC8A1	1.20476	6.03e-10	5.05e-09	1
FGGY	0.201819	0.0148149	0.0272383	1
RAPGEF6	-0.289046	8.34e-07	3.75e-06	1
ANO5	1.37258	2.75e-09	2.01e-08	1
GFPT2	0.47263	0.00204064	0.00464948	1
NOA1	-0.530441	3.25e-14	6.78e-13	1
HSPD1	-0.604078	4.62e-12	6.04e-11	1
ZNF232	0.225174	0.00096426	0.00235481	1
PREP	-0.49326	1.93e-09	1.45e-08	1
RFX3	-1.01215	1.05e-13	1.96e-12	1
SYT12	0.580238	0.00136722	0.00323638	1
BCHE	1.428	3.08e-08	1.83e-07	1
MAP3K13	-0.245152	1.98e-05	6.91e-05	1
PLCL2	0.787692	4.69e-08	2.69e-07	1
PXDN	-1.06404	1.19e-16	4.24e-15	1
LIMD1	-0.181598	0.00584473	0.0118908	1
TOX3	-1.68737	4.93e-16	1.53e-14	1
CRHBP	1.24727	2.47e-08	1.5e-07	1
RCSD1	0.61215	8.21e-05	0.000250046	1
CEP120	0.471816	3.9e-12	5.16e-11	1
PRR22	-0.571703	7.87e-05	0.000240699	1
CDC42EP3	0.893714	1.29e-12	1.91e-11	1
MFN2	0.45867	3.44e-17	1.38e-15	1
MTX1	-0.188773	0.00200638	0.00457991	1
MAPK10	0.339016	0.019311	0.0345868	1
POF1B	1.39094	2.55e-05	8.72e-05	1
TM6SF1	0.348085	0.0198	0.0353641	1
NFIL3	0.325161	0.0158241	0.0289321	1
EPHA4	0.33509	0.0229324	0.0401938	1
ZBTB20	0.456718	0.00218896	0.00495373	1
XPC	0.295857	3.85e-07	1.85e-06	1
AGTPBP1	-0.30007	0.000564899	0.0014535	1
PCSK6	-1.98796	1.42e-32	1.05e-29	1
HCFC1	-0.193469	0.00135056	0.00319939	1
KIF14	-1.15886	2.9e-08	1.74e-07	1
SH3PXD2A	0.719605	8.53e-09	5.65e-08	1
SPINK5	1.18749	2.03e-05	7.05e-05	1
JADE1	0.252251	0.0185367	0.0333491	1
MTG1	-0.672262	2.6e-09	1.91e-08	1
SLC4A5	-0.251205	0.00473156	0.00986347	1
GRIP1	0.579278	4.78e-07	2.25e-06	1
TCF21	0.6015	0.00149047	0.00350113	1
WNT6	1.33129	3.9e-08	2.28e-07	1
LXN	0.403669	0.0142738	0.026367	1
TLK1	-0.325071	3.61e-05	0.000119163	1
KLHL21	0.461614	1.49e-09	1.15e-08	1
ELAVL2	-2.09064	1.4e-11	1.66e-10	1
FBXL20	-0.137182	0.00991295	0.0190386	1
NAB2	0.495755	1.25e-06	5.42e-06	1
TYRP1	-0.758593	0.0209678	0.037114	1
POLR1A	-0.424177	1.66e-09	1.27e-08	1
HCAR2	1.21457	2.15e-08	1.32e-07	1
KIAA0319L	-0.713943	5.04e-18	2.37e-16	1
SUMF1	-0.226005	0.000389623	0.00103676	1
GABRE	0.979323	0.000241225	0.000669674	1
PCDHGA5	-1.01198	0.00013809	0.00040303	1
AZGP1P1	-1.2402	3.31e-06	1.34e-05	1
NT5E	1.15589	2.81e-12	3.82e-11	1
GK5	-0.52423	3.44e-09	2.47e-08	1
SIGLEC1	-0.547823	0.00489388	0.0101662	1
SLC9A2	-0.572994	1.79e-05	6.29e-05	1
ADD1	0.280217	4.54e-11	4.8e-10	1
PARD6A	-0.342042	0.00340575	0.00736288	1
SCNN1B	1.55498	1.33e-07	7.02e-07	1
YPEL1	-1.31721	2.18e-30	1.09e-27	1
FBXL5	0.250781	6e-05	0.00018797	1
TRHDE	1.38427	2.65e-09	1.94e-08	1
KAT5	0.190308	1.45e-05	5.17e-05	1
CSRNP1	0.440561	0.00429824	0.00906269	1
MAN2C1	-0.21739	0.00335395	0.00726452	1
CEP72	-0.259404	0.000783266	0.00195239	1
NRXN1	1.48444	3.03e-08	1.8e-07	1
ZNF18	-0.27977	0.00207245	0.00471438	1
SLC37A1	-0.880616	7.33e-15	1.75e-13	1
YJEFN3	-0.869541	3.41e-05	0.000113184	1
OIP5	-0.346527	0.0147669	0.0271636	1
IL1RAPL1	-0.99077	0.00154235	0.00360964	1
GPR160	-1.23629	2.74e-22	3.32e-20	1
APOBEC3F	0.984637	2.62e-08	1.58e-07	1
WDR82	0.351573	1.41e-11	1.66e-10	1
MKKS	0.304212	4.2e-08	2.44e-07	1
TRIM6	1.17375	1.13e-12	1.69e-11	1
CD109	0.444175	0.00155479	0.00363646	1
ADAMTS12	0.407981	0.0163925	0.0298558	1
AVL9	-0.560214	3.28e-13	5.5e-12	1
TBC1D16	-0.514139	5.39e-06	2.09e-05	1
PABPN1	-0.280817	0.000679041	0.0017158	1
PLXNA4	0.968302	6.26e-07	2.88e-06	1
ASPN	-1.14605	3.63e-08	2.14e-07	1
SPEG	1.19114	5.48e-10	4.62e-09	1
STK10	0.300763	0.00370137	0.00793218	1
AAAS	-0.281922	7.39e-09	4.96e-08	1
HOXD8	0.873313	3.89e-08	2.27e-07	1
PCED1B	0.738082	1.43e-06	6.14e-06	1
POLR3A	-0.354391	6.1e-10	5.09e-09	1
SPAG5	-0.639771	1.93e-06	8.1e-06	1
FAM8A1	0.195335	0.00110868	0.00267349	1
ENTPD6	-0.801886	2.03e-21	2.03e-19	1
FAM83B	1.93397	4e-09	2.83e-08	1
ACY1	-0.714392	8.61e-12	1.06e-10	1
GHITM	0.232944	5.68e-05	0.000179261	1
AGRN	-0.294055	0.00322642	0.00701308	1
IRX4	-1.99854	1.1e-10	1.09e-09	1
TLE3	-0.456915	2.29e-13	3.96e-12	1
TRIM4	0.16697	0.00621859	0.0125606	1
APPL2	-0.331946	1.18e-05	4.29e-05	1
MRPL13	-0.175385	0.0207907	0.0368502	1
PACS1	-0.240755	0.000253806	0.000701011	1
TIAM2	0.364383	2.26e-08	1.38e-07	1
PRC1	-0.689299	1.67e-08	1.04e-07	1
HOXC4	-2.74989	1.77e-25	3.58e-23	1
LPIN2	-0.224313	0.00269369	0.00595839	1
TGFBRAP1	-0.311182	1.94e-06	8.14e-06	1
TMEM181	-0.222955	0.00115821	0.00278201	1
KIAA1257	-0.595224	3.62e-05	0.000119562	1
RPL28	-0.461716	2.34e-05	8.03e-05	1
TOM1L1	-0.498148	9.83e-08	5.32e-07	1
CPEB4	0.349913	0.000736133	0.0018474	1
C11orf80	-0.478537	7.95e-08	4.37e-07	1
SPATA18	1.21534	1.65e-09	1.26e-08	1
ELMO1	0.396012	0.00188695	0.0043279	1
GPER1	0.818452	9.81e-06	3.61e-05	1
PRX	0.440748	1.96e-06	8.22e-06	1
TARBP2	-0.351726	3.35e-07	1.63e-06	1
RBM5	-0.244018	0.000467245	0.00122237	1
NEURL1	0.707078	0.000419528	0.00110776	1
TGS1	0.18863	0.00592626	0.0120394	1
P2RX2	0.956876	0.000228624	0.000638539	1
FAM50B	0.30834	0.00832519	0.0163013	1
TBC1D32	-0.299926	0.00262171	0.00581803	1
ZBED4	-0.585253	1.12e-15	3.19e-14	1
CLCN3	-0.391596	1.16e-05	4.24e-05	1
RHOJ	0.593957	1.2e-05	4.35e-05	1
INTS2	0.249815	0.00169695	0.00393154	1
PHEX	0.527862	0.00044683	0.00117296	1
FILIP1L	0.858756	1.51e-05	5.38e-05	1
L3HYPDH	-0.295921	0.00680423	0.0135996	1
SCN7A	0.633577	0.00606313	0.0122917	1
CATSPERB	-0.770381	1.48e-09	1.15e-08	1
NADK	-0.337739	2.05e-11	2.33e-10	1
SGSH	-0.528766	1.49e-13	2.65e-12	1
ATP6AP2	0.253595	4.38e-06	1.73e-05	1
ABHD10	-0.22879	0.00309687	0.00675935	1
HERC5	0.293776	0.00810292	0.0159021	1
SYDE1	0.869675	1.17e-09	9.24e-09	1
NHS	1.18347	2.37e-13	4.09e-12	1
CASKIN2	0.212533	0.000710205	0.00178817	1
ILDR2	0.856375	3.38e-07	1.64e-06	1
EHD1	0.277235	4.58e-05	0.000147725	1
KCTD8	1.12186	0.000144796	0.00042073	1
CUL7	-0.370531	7.28e-08	4.02e-07	1
HS3ST2	-0.815379	5.4e-05	0.000171109	1
CENPB	0.285272	2.62e-05	8.92e-05	1
CELSR2	0.719904	2.41e-10	2.21e-09	1
EBNA1BP2	-0.205349	0.000714326	0.00179781	1
CIAPIN1	-0.189434	0.00450958	0.00946498	1
PTPRJ	-0.586789	7.85e-11	7.94e-10	1
ZNF668	-0.209322	0.00283704	0.00624548	1
KLHL5	0.757699	4.28e-10	3.7e-09	1
PPM1G	-0.229024	8.42e-05	0.000255773	1
HDAC10	-0.414885	0.00140934	0.00332838	1
MASP1	1.27582	4.85e-07	2.28e-06	1
RPAP2	-0.200455	0.000807474	0.00200514	1
CALD1	1.00761	2.98e-13	5.05e-12	1
ST6GAL1	-0.747609	0.000484598	0.001264	1
POM121C	-0.351578	1.65e-09	1.27e-08	1
NSMAF	-0.321569	8.71e-06	3.24e-05	1
CNOT3	-0.181276	4.74e-05	0.00015225	1
TYW1	-0.148193	0.0027666	0.00610501	1
C16orf70	-0.778634	4.33e-16	1.37e-14	1
EIF3I	-0.371025	2.15e-07	1.08e-06	1
PDE1B	0.791725	3.28e-08	1.94e-07	1
DOCK7	-0.194716	0.026872	0.0462709	1
ARHGEF19	1.1601	8.86e-13	1.35e-11	1
SAMD4B	-0.0963038	0.0282924	0.0483648	1
FAM13B	0.587723	4.16e-14	8.45e-13	1
ATXN2L	-0.315675	7.08e-07	3.23e-06	1
PAX5	-1.3328	6.61e-06	2.51e-05	1
MYBBP1A	-0.47772	2.64e-12	3.61e-11	1
LRRC75A-AS1	-0.492685	3.61e-06	1.45e-05	1
KCNS3	-0.787717	1.14e-06	5e-06	1
MBD1	0.165341	0.000321963	0.000871238	1
ACKR3	1.07992	1.19e-10	1.16e-09	1
PSD3	-0.4486	0.000582842	0.00149445	1
GNB3	0.840829	2.76e-06	1.13e-05	1
FAM174B	-0.633332	3.59e-09	2.57e-08	1
RAP1GDS1	0.199065	0.000233993	0.000651936	1
USP30	0.133559	0.00861032	0.0167852	1
ARHGEF10L	0.573414	1.25e-14	2.84e-13	1
RNF122	0.465462	0.00013953	0.000406973	1
RYK	0.286066	2.78e-09	2.03e-08	1
NUFIP2	-0.140921	0.0162377	0.0296207	1
POLR1C	-0.365429	5.21e-08	2.96e-07	1
TRIO	-0.277161	0.00158457	0.00369906	1
FCRL6	0.462699	0.0186077	0.033454	1
TM9SF1	-0.262144	8.23e-05	0.000250657	1
ZNF473	-0.482371	0.00203299	0.00463376	1
SLC37A3	-0.562871	1.38e-11	1.63e-10	1
POLG2	-0.282265	0.000186142	0.000528704	1
PTPRE	0.354767	0.00602051	0.0122133	1
FBXW8	-0.212127	0.00493245	0.0102371	1
MYO3B	0.820507	0.000111372	0.000330867	1
GINS3	0.521015	8.1e-10	6.56e-09	1
DDX19B	0.3077	1.01e-06	4.49e-06	1
EXT2	-0.13857	0.00914114	0.0177039	1
ACVRL1	0.894024	8.18e-12	1.02e-10	1
PNPLA4	-0.139238	0.0236127	0.0412528	1
MAML2	0.842977	1.6e-08	1e-07	1
CTDSPL2	0.143986	0.0153401	0.0281226	1
SLC16A7	0.902558	1.8e-07	9.22e-07	1
ITGB4	1.17922	3.38e-10	2.98e-09	1
ANKRD35	1.15224	8.71e-10	7.01e-09	1
TBC1D5	0.155448	0.0112479	0.0213115	1
MYO6	-1.09174	1.61e-10	1.52e-09	1
BTN3A2	0.37211	0.011124	0.0211159	1
HSPBAP1	-0.178748	0.0137761	0.0255604	1
PRTFDC1	1.14803	6.56e-13	1.03e-11	1
SYNC	1.10946	5.61e-09	3.85e-08	1
PTHLH	0.529747	0.0023645	0.00530149	1
FGD4	0.316243	0.0056739	0.0115739	1
SNRPA	-0.188327	0.0105259	0.0200819	1
GATAD2A	-0.195024	0.00039672	0.00105342	1
GPRASP2	0.217667	0.00316025	0.00688789	1
ITGA1	0.818152	1.14e-07	6.08e-07	1
FOLR1	2.39795	3.68e-14	7.57e-13	1
BAG1	0.210061	0.00366084	0.00785577	1
MYNN	0.199906	9.78e-05	0.000293879	1
CORO2B	0.982698	7.57e-10	6.19e-09	1
TECR	0.41782	1.48e-07	7.69e-07	1
ITGA8	0.942015	7.71e-05	0.000236161	1
RASEF	-0.7385	7.5e-11	7.64e-10	1
RIPK2	-0.733412	3.09e-13	5.23e-12	1
GRHL2	-0.593992	8.94e-12	1.1e-10	1
LRRC43	1.03743	5.74e-10	4.82e-09	1
CNR1	1.2532	2.35e-09	1.74e-08	1
ABCC4	-2.24909	4.29e-29	1.68e-26	1
FAM69B	-0.542174	7.16e-07	3.26e-06	1
ARNTL2	0.463079	0.00615163	0.0124465	1
LEPR	0.644503	6.99e-05	0.000215921	1
ERN2	2.02549	2.07e-06	8.65e-06	1
FABP3	1.04171	7.81e-08	4.3e-07	1
CCNL2	-0.534968	2.82e-05	9.54e-05	1
TBC1D2B	0.38044	1.44e-06	6.18e-06	1
RFX1	0.180394	0.00453036	0.0094971	1
HOXA10	-0.374051	0.00104495	0.0025334	1
KIF21A	-0.446144	0.000199884	0.000564169	1
LZTS1	0.310181	0.0288442	0.0492031	1
ZNF578	0.490765	0.00666783	0.0133574	1
NEK1	-0.228921	0.0279517	0.0478668	1
MYH11	1.40376	3.45e-09	2.47e-08	1
MPP2	1.37171	1.69e-13	2.98e-12	1
TNK2	-0.740472	5.06e-15	1.26e-13	1
AGK	-0.255582	1.17e-05	4.26e-05	1
TBC1D20	0.139794	0.000621065	0.00158255	1
SLC45A2	-4.27853	7.05e-27	1.94e-24	1
RABGAP1	0.328241	8.45e-10	6.82e-09	1
SOX17	0.546061	0.00377591	0.00807315	1
CHCHD1	-0.250131	0.00461549	0.00965209	1
TGFBR1	0.302351	0.000504299	0.0013113	1
LRPPRC	-0.190272	0.00467218	0.00975294	1
TM4SF18	0.391642	0.02738	0.0469727	1
ZCCHC3	0.108057	0.0258675	0.0447257	1
KCNH6	-0.982544	0.00394552	0.00839875	1
G0S2	1.66354	5.7e-21	5.12e-19	1
ZNF195	-0.314695	9.99e-08	5.4e-07	1
PER3	0.620352	1.88e-06	7.93e-06	1
DHX34	-0.157123	0.0239417	0.041788	1
SUN2	-0.175795	0.00673001	0.0134659	1
MLLT3	-0.216003	0.00819168	0.0160592	1
NUMBL	0.250996	0.00276423	0.00610124	1
PRR4	-0.806143	0.00145634	0.0034262	1
KRI1	-0.141844	0.0107095	0.020409	1
LASP1	0.262087	0.00303224	0.00663321	1
SHMT1	0.459167	7.33e-10	6.01e-09	1
CXorf38	0.340534	1.48e-11	1.74e-10	1
RAB17	-1.46696	2.09e-28	7.39e-26	1
FBXL2	1.03954	1.9e-10	1.77e-09	1
ZNF333	0.158216	0.00458978	0.00961126	1
L1CAM	1.14168	3.3e-05	0.000109869	1
PRKAA2	-0.349886	0.00374969	0.00802454	1
PRDM8	1.50398	2.21e-09	1.65e-08	1
USP6	0.38351	0.00507284	0.0104859	1
SLX4	-0.247679	0.000132655	0.000388397	1
PABPC1L	-0.635908	0.00144053	0.00339291	1
COL28A1	-0.651289	0.00441619	0.00928802	1
BRAT1	-0.329971	3.5e-05	0.000116009	1
GTPBP4	-0.287352	2.27e-08	1.39e-07	1
IRF2BP1	-0.305369	5.85e-05	0.000183804	1
SAMD14	0.927243	6.45e-09	4.38e-08	1
ITIH6	-1.20979	6.89e-06	2.61e-05	1
TPGS2	0.144835	0.00857268	0.0167212	1
SDK1	-1.82301	6.92e-15	1.66e-13	1
SYK	0.524074	0.000277654	0.000759366	1
ACSM1	-2.63472	7.45e-14	1.44e-12	1
CYP27A1	1.21477	1.66e-07	8.6e-07	1
FANCI	-0.224685	0.0125732	0.0235131	1
TNS4	2.01683	1.08e-07	5.8e-07	1
IRX2	-0.937049	1.45e-10	1.39e-09	1
TMEM109	0.240336	5.21e-05	0.000165682	1
PPM1L	0.590976	5.8e-07	2.69e-06	1
CNTNAP2	-1.58453	2.02e-10	1.88e-09	1
ACAD10	-0.336711	8.43e-07	3.79e-06	1
DYNC1I1	0.958563	4.93e-09	3.43e-08	1
RRP12	-0.651808	8.21e-15	1.93e-13	1
ACTB	0.605871	3.04e-14	6.41e-13	1
ZFP64	-0.154135	0.00210968	0.00479196	1
IMPG1	-0.966332	1.16e-05	4.23e-05	1
ZNF587	-0.531267	1.16e-12	1.73e-11	1
C11orf24	-0.178859	0.00495447	0.0102747	1
SMG6	0.284551	0.0068089	0.013606	1
METTL4	0.305101	9.99e-08	5.4e-07	1
NIT2	-0.330589	1.12e-07	6.01e-07	1
TCF7L2	0.20782	0.00407269	0.0086445	1
WSB2	-0.480685	1.57e-08	9.88e-08	1
PLEKHS1	-0.793618	0.000259153	0.000714647	1
QSER1	0.392209	0.00425783	0.00898881	1
HIPK2	-0.848417	1.72e-12	2.47e-11	1
AKT1	-0.155827	0.00371169	0.00795152	1
PLEKHA4	0.424964	0.00264119	0.00585842	1
CRTAC1	2.51145	3.5e-24	5.82e-22	1
ERCC6L	-0.764502	1.04e-07	5.59e-07	1
PON2	-0.213203	0.000884767	0.00217625	1
ANKRD27	0.163196	0.00109938	0.00265418	1
HPS5	0.195404	0.00208556	0.00474068	1
CARF	0.351701	7.17e-07	3.26e-06	1
GTF3C6	-0.646406	3.85e-08	2.25e-07	1
MAK	-1.04849	4.2e-09	2.95e-08	1
ARRDC1	-0.213679	0.0117649	0.0221522	1
TMEM132B	0.738807	0.0004153	0.00109817	1
SGCE	1.07048	1.69e-12	2.43e-11	1
MIOS	-0.565885	2.15e-13	3.74e-12	1
GKAP1	0.159863	0.0163106	0.0297361	1
PPP2R5E	0.127143	0.0113231	0.0214342	1
SEPHS2	-0.206948	0.00165215	0.00384076	1
PYGM	1.11872	1.01e-06	4.47e-06	1
PPP1R18	0.539061	8.24e-06	3.08e-05	1
LPAR1	1.04074	9.07e-12	1.11e-10	1
SCN2B	1.49716	2.09e-10	1.94e-09	1
RASGRF2	0.620157	7.76e-07	3.51e-06	1
SERBP1	-0.246262	8.36e-07	3.76e-06	1
STK38	0.205832	0.000205697	0.000579511	1
ADAMTSL3	0.849913	2.03e-05	7.05e-05	1
E2F3	-0.523479	6.2e-08	3.48e-07	1
KLHL3	0.505798	0.00152626	0.00357837	1
NDC1	-0.268063	0.000122543	0.000361316	1
DAAM1	-0.155155	0.0142332	0.0263132	1
UGT1A3	-2.07567	1.19e-05	4.33e-05	1
B3GAT3	-0.418498	4.49e-06	1.77e-05	1
TRAP1	-0.400602	1.38e-08	8.75e-08	1
CENPF	-1.22516	1.18e-10	1.15e-09	1
SLC16A10	-0.47306	0.00294595	0.00646285	1
SERHL	-0.867577	2.31e-05	7.94e-05	1
MAMLD1	1.29405	3.52e-14	7.27e-13	1
UBC	0.328468	2.88e-07	1.42e-06	1
NADK2	-0.180273	0.00592132	0.0120307	1
MLC1	1.7518	6.99e-09	4.71e-08	1
PYROXD2	-0.540778	0.000173308	0.000495919	1
TKT	-0.330225	0.000231802	0.000646729	1
AHDC1	0.597748	1.92e-11	2.19e-10	1
HERPUD2	0.138674	0.000577937	0.0014827	1
CSPG4	0.797693	7.75e-06	2.91e-05	1
BTN2A1	0.506912	2.9e-15	7.61e-14	1
CLUH	-0.211956	0.0056681	0.0115646	1
ZNF131	-0.171967	0.00182147	0.00418999	1
FBXO42	-0.126395	0.00474079	0.0098816	1
MRPL45	-0.210362	0.00037251	0.000994872	1
SPPL2B	-0.298892	0.000860549	0.00212377	1
LRFN5	1.01407	1.5e-06	6.43e-06	1
S1PR2	0.317619	0.00212706	0.00482847	1
ENTPD3	1.26842	2.63e-14	5.6e-13	1
IMPDH2	-0.76214	1.66e-12	2.4e-11	1
RHOC	0.364726	1.51e-05	5.38e-05	1
EPHX3	1.30039	1.95e-08	1.21e-07	1
HTR7	0.475103	0.0126356	0.023613	1
PLEKHO1	0.714754	4.28e-08	2.48e-07	1
HECTD2	0.690448	3.65e-11	3.95e-10	1
FOXA2	1.30368	0.000142892	0.000415727	1
IGHG2	-0.907832	0.0116675	0.0219913	1
SLC8B1	-0.315934	5.86e-06	2.25e-05	1
DENND1A	-0.369235	8.41e-10	6.8e-09	1
ABHD2	-1.12333	1.67e-11	1.93e-10	1
TRIM29	1.9473	1.51e-08	9.54e-08	1
CELF1	-0.21203	7.97e-06	2.99e-05	1
POGZ	-0.167615	0.00673973	0.0134839	1
DEPDC5	0.135799	0.00566421	0.0115593	1
MAPRE1	0.362768	4.15e-14	8.44e-13	1
SLC38A4	1.29358	0.000208593	0.000586774	1
WDR62	-0.447773	0.00332169	0.00720396	1
ITFG2	0.426675	1.14e-10	1.11e-09	1
HLF	0.907823	3.91e-08	2.28e-07	1
NAALADL2	-0.781774	2.09e-06	8.74e-06	1
SYTL1	-0.278359	0.0292943	0.0498785	1
GGA1	-0.260932	2.19e-06	9.1e-06	1
PHACTR1	0.319791	0.0108255	0.0205959	1
MEGF10	0.55128	0.00458066	0.0095945	1
GAA	-0.576638	7.55e-10	6.17e-09	1
HCK	0.375578	0.01139	0.0215432	1
MOGS	-0.678547	3.01e-22	3.63e-20	1
FMN1	-0.557656	0.0017475	0.00403749	1
YWHAH	0.312457	0.000131379	0.000385149	1
UMPS	-0.249037	2.29e-06	9.53e-06	1
ASAP1	0.442082	3.01e-05	0.00010115	1
COL23A1	1.16299	7.68e-09	5.14e-08	1
LRRC2	1.06908	1.38e-05	4.93e-05	1
GLDN	1.89572	6.37e-15	1.54e-13	1
EGF	-1.2424	2.95e-07	1.45e-06	1
BRCC3	-0.261682	2.27e-05	7.83e-05	1
KCND3	-0.37803	0.00229711	0.00516927	1
DNAJC16	-0.304109	1.34e-07	7.04e-07	1
LRRC56	-0.898523	1.1e-15	3.15e-14	1
ZNF442	0.498801	7.79e-12	9.71e-11	1
KLK4	-1.62172	9.15e-17	3.34e-15	1
WNK4	-0.746272	0.00050025	0.00130133	1
USP18	-0.49166	1.39e-05	4.97e-05	1
IPO5	0.154566	0.00695122	0.0138693	1
NPY1R	0.768604	1.14e-06	4.98e-06	1
ACE2	1.59385	1.53e-15	4.25e-14	1
TPPP3	0.566826	0.00757946	0.0149833	1
FMOD	-1.30314	5.81e-09	3.98e-08	1
LUZP2	-3.04973	2.75e-25	5.38e-23	1
SIK2	-0.150999	0.0281454	0.0481538	1
SH2D3C	0.320991	0.0107179	0.0204229	1
BMS1	-0.16955	0.000774935	0.00193372	1
CAND2	1.00973	1.72e-10	1.62e-09	1
FCRLB	1.22031	1e-13	1.87e-12	1
ENPP2	0.381464	0.0153315	0.0281095	1
SLC6A16	0.705439	6.34e-06	2.42e-05	1
PTPN9	0.142824	0.00291107	0.00639318	1
CLIC1	-0.167543	0.0138389	0.0256693	1
KIAA0556	-0.419609	2.01e-09	1.51e-08	1
COLEC12	-1.50867	7.54e-20	5.07e-18	1
KCNQ1	0.577518	4.76e-05	0.000152667	1
NR2F2	0.217972	0.00343137	0.00741392	1
SSFA2	0.288296	0.00101259	0.00246109	1
CTTNBP2	1.14759	9.86e-12	1.2e-10	1
ANGPTL1	1.32597	4.79e-08	2.75e-07	1
FGD2	0.438258	0.006501	0.0130687	1
ZNF33B	-0.174697	0.00910486	0.0176448	1
MOCS1	0.339564	0.00536191	0.0110155	1
OLFM2	-0.643865	5.99e-06	2.3e-05	1
B3GALT2	1.25028	9.52e-08	5.16e-07	1
CCDC74A	0.697775	4.61e-05	0.000148551	1
FAM111A	-0.923075	1.1e-17	4.89e-16	1
ZNF664	-0.450221	6.04e-10	5.05e-09	1
GFPT1	-0.496578	6.54e-08	3.65e-07	1
ARHGAP32	-0.824541	2.42e-15	6.42e-14	1
SMAD2	0.156772	0.002829	0.00622927	1
FOXJ3	-0.186132	0.000178254	0.000508652	1
CENPE	-0.568193	0.00011907	0.000352033	1
ZIC5	-3.762	1.55e-14	3.47e-13	1
TSPAN12	0.686334	3.11e-06	1.27e-05	1
CYP4F22	2.70807	2.63e-18	1.31e-16	1
FOXC2	0.436117	0.0262932	0.0453936	1
CA4	1.20356	2.07e-06	8.65e-06	1
ISLR	0.446689	0.00454759	0.00953065	1
UTP18	-0.230913	4.25e-05	0.000137911	1
DDX31	-0.262308	2.07e-05	7.17e-05	1
TULP1	0.963685	1.13e-08	7.29e-08	1
RCHY1	-0.239279	2.09e-05	7.24e-05	1
PPP2R5B	0.388619	1.87e-09	1.41e-08	1
MAML1	-0.153784	0.00840888	0.0164413	1
MUC6	1.64166	0.00807098	0.0158462	1
GCSAML	-0.950965	0.00408519	0.00866703	1
WNT2	1.01908	0.000427507	0.00112673	1
GLMN	-0.218949	0.00125355	0.00299345	1
TRIM52	-0.15831	0.0152042	0.0278872	1
DCLRE1A	-0.319892	0.000320474	0.000867847	1
GBP1	0.836403	2.54e-06	1.05e-05	1
CEP55	-1.04197	6.01e-08	3.37e-07	1
WDR7	0.271218	0.00138514	0.00327627	1
GABRD	-0.803492	0.000435987	0.00114685	1
CD163L1	-0.823161	0.00110454	0.00266455	1
NCKAP1L	0.482649	0.00198355	0.00453453	1
F2R	-0.540314	0.000796502	0.0019819	1
PID1	0.349277	0.0245991	0.0428017	1
ANKRD44	0.451545	2.08e-05	7.2e-05	1
CPNE6	2.19701	9.67e-09	6.34e-08	1
PDE7A	-0.249267	0.00533715	0.0109683	1
NFE2L1	0.194929	0.000720079	0.0018113	1
RASL11B	1.47027	3.17e-14	6.64e-13	1
NT5DC2	0.456767	3.72e-05	0.000122256	1
HSP90AB1	-0.21295	0.00015514	0.000448316	1
VARS	-0.579191	2.58e-15	6.83e-14	1
WWC3	0.832924	9.66e-22	1.04e-19	1
RAB34	1.21028	5.58e-15	1.37e-13	1
ARSD	-0.439964	5.78e-07	2.68e-06	1
RB1	0.22024	0.00999483	0.019175	1
RBFOX2	0.514016	2.47e-14	5.29e-13	1
TIMELESS	-0.376853	1.09e-06	4.8e-06	1
PPRC1	-0.348303	1.7e-06	7.22e-06	1
PHF8	-0.541251	8.22e-08	4.5e-07	1
CA3	2.07029	1.35e-06	5.81e-06	1
P4HA1	-0.466578	1.63e-07	8.45e-07	1
MB21D2	0.75728	9.49e-09	6.23e-08	1
ZFAND5	0.63343	5.96e-15	1.45e-13	1
RAPGEF2	-0.202587	0.0112236	0.0212743	1
MX1	0.67508	0.000329178	0.000889195	1
EXOSC4	-0.321927	0.00379877	0.00811544	1
NLRP1	0.949631	2.94e-10	2.63e-09	1
ZNF615	-0.799281	4.21e-10	3.66e-09	1
CHRNA3	-0.608282	0.005034	0.0104162	1
PIAS4	-0.245089	7.75e-07	3.51e-06	1
WDR48	0.292829	9.48e-12	1.16e-10	1
AGPAT5	-0.285591	0.00151993	0.00356488	1
ABCB6	-0.232085	0.0038912	0.00829079	1
MRPS25	-0.224135	0.00084937	0.00209899	1
RPL11	-0.339139	0.000396166	0.00105241	1
WDR37	-0.403389	9.39e-09	6.17e-08	1
RPL8	-0.272527	0.0135124	0.0251242	1
RBM39	-0.246183	2.5e-06	1.03e-05	1
HAX1	0.204643	0.000177162	0.000506005	1
VGF	-1.14663	1.84e-05	6.46e-05	1
SLCO5A1	-1.08465	2.31e-07	1.16e-06	1
ADPGK	-0.730097	3.75e-13	6.22e-12	1
ZBTB3	-0.206795	0.00216334	0.00490055	1
DNM1L	0.149209	0.00468985	0.00978429	1
NOD2	0.750316	1.12e-05	4.09e-05	1
SCMH1	-0.124233	0.0149098	0.0274018	1
ARMC5	-0.260505	0.00322305	0.00700736	1
COL8A2	0.876106	2.57e-07	1.27e-06	1
TXLNB	-1.14375	4.08e-07	1.95e-06	1
ZNF91	-0.248564	0.000277383	0.000758964	1
MKRN1	-0.143579	0.00273832	0.00604694	1
AKAP11	0.374764	4.53e-05	0.000146157	1
CCDC7	-0.452788	6.27e-06	2.39e-05	1
RGS7BP	1.00983	7.36e-06	2.78e-05	1
PARP9	-0.447126	2.43e-05	8.33e-05	1
MGRN1	-0.219753	5.06e-07	2.37e-06	1
TCN2	0.937215	7.57e-15	1.8e-13	1
AMIGO2	1.18686	3.92e-11	4.2e-10	1
TRIM36	-1.76168	5.02e-34	5.13e-31	1
EVPL	-0.496662	1.68e-09	1.28e-08	1
SLC17A5	-0.542138	8.35e-08	4.57e-07	1
PIPOX	1.05297	2.38e-14	5.12e-13	1
HSPA12A	0.699007	1.27e-07	6.72e-07	1
SPC24	-0.826104	5.48e-07	2.55e-06	1
ZFAT	-0.157566	0.00891711	0.0173229	1
PPIP5K1	-0.373752	2.9e-08	1.74e-07	1
IFIT3	0.748448	7.09e-05	0.000218726	1
PDE3B	-1.33966	2.77e-17	1.12e-15	1
PGK1	0.219349	0.0022291	0.00503158	1
PLOD1	-0.196164	0.00494276	0.0102527	1
MTFR1	-0.273672	0.000798459	0.00198569	1
PLAU	1.09712	1.8e-12	2.57e-11	1
AFF1	-0.208849	0.0136221	0.0253103	1
FRMD3	1.06484	1.2e-12	1.78e-11	1
GUCY1A3	-1.27731	9.27e-17	3.38e-15	1
RASSF7	-0.5018	0.00019848	0.00056055	1
TICAM1	-0.169433	0.00504107	0.0104285	1
HLTF	-0.367222	1.05e-05	3.86e-05	1
C17orf67	0.434564	5.7e-06	2.2e-05	1
NETO2	-2.06868	5.99e-26	1.4e-23	1
PROM2	0.357508	0.00953545	0.0183961	1
RAB3GAP1	0.2531	2.42e-05	8.29e-05	1
PKD2	0.53858	1.49e-07	7.75e-07	1
SLC44A2	0.228173	3.47e-05	0.000115113	1
LRRC8C	0.272024	0.0256786	0.0444616	1
MAN2A2	-0.318953	1.37e-05	4.91e-05	1
PLK1	-0.867266	2.5e-08	1.51e-07	1
TTLL6	-0.790201	3.44e-08	2.03e-07	1
DAB1	1.59182	8.63e-10	6.96e-09	1
RFTN1	0.492114	0.00053178	0.001375	1
DNAAF3	-1.19003	3.09e-08	1.84e-07	1
BTG1	0.308534	3.44e-05	0.000114139	1
ZNF749	-0.354171	0.000202479	0.000571056	1
HIST1H2AE	-1.05844	4.83e-07	2.28e-06	1
EVC2	1.02015	5.1e-10	4.34e-09	1
GRIPAP1	-0.204931	4.62e-06	1.81e-05	1
SEMA3A	1.24921	2.06e-08	1.27e-07	1
ABCA1	-0.358289	0.00559045	0.0114353	1
EDC3	-0.306286	3.71e-09	2.65e-08	1
IGSF1	1.89015	4.36e-10	3.77e-09	1
COPG1	-0.493134	1.25e-10	1.22e-09	1
HSD17B4	-0.411565	0.000625719	0.00159242	1
SLC4A3	0.256413	0.0138589	0.0257011	1
DHX33	-0.230888	8.09e-05	0.000246977	1
NTNG2	0.944372	1.18e-05	4.28e-05	1
LRFN3	-0.154322	0.0211959	0.0374674	1
SRPK3	0.390751	0.0255373	0.0442545	1
FKBP14	0.46625	1.35e-12	1.99e-11	1
REC8	1.14548	3.4e-14	7.05e-13	1
DUOX2	2.53346	4.07e-15	1.04e-13	1
ARHGEF2	0.693917	3.36e-11	3.67e-10	1
PRKD3	0.385693	3.84e-06	1.53e-05	1
NRIP1	-0.382225	0.00126565	0.00301882	1
METRN	0.453341	0.000742101	0.00185959	1
ITSN2	0.17434	0.00575994	0.0117325	1
HOXB13	-1.75859	3.39e-22	3.95e-20	1
ZP1	-1.47242	1.62e-07	8.38e-07	1
HDAC9	0.688774	0.00228413	0.00514446	1
MPND	-0.321416	0.000219709	0.000615787	1
PPP3CC	0.193746	0.00419949	0.00887683	1
VAPA	0.201118	2.23e-05	7.67e-05	1
CDPF1	0.162138	0.0185291	0.0333419	1
MTOR	-0.551448	1.53e-09	1.18e-08	1
CARD6	0.900968	5.02e-10	4.28e-09	1
STK38L	0.301341	0.000259875	0.000716483	1
C4orf19	1.51383	2.33e-07	1.17e-06	1
KSR1	1.09939	1.36e-12	1.99e-11	1
MORF4L2	0.183675	0.000130115	0.000382052	1
HSPB2	1.43289	3.27e-13	5.5e-12	1
JAKMIP1	0.79953	0.00143539	0.00338253	1
CD248	0.878352	2.72e-08	1.64e-07	1
SYT15	0.600241	0.00017539	0.000501566	1
NCAPG2	-0.317006	0.000843228	0.00208465	1
CCDC158	0.99397	2.8e-10	2.52e-09	1
BEST1	0.64776	7.73e-10	6.3e-09	1
PHKA1	-0.284649	3.03e-06	1.23e-05	1
BEND7	0.535661	9.93e-05	0.000297854	1
CYB561D2	-0.399873	2.12e-05	7.35e-05	1
MYO5A	-0.28884	0.00182552	0.00419773	1
SIPA1L3	-0.726756	6.33e-17	2.38e-15	1
SMPDL3A	-0.499851	4.83e-05	0.000154629	1
NOC2L	-0.4244	1.68e-12	2.42e-11	1
SPTBN5	0.403171	0.0112534	0.0213198	1
BMP4	0.779255	6.45e-06	2.46e-05	1
SLC12A9	-0.264362	9.65e-05	0.0002904	1
AGFG2	-0.252877	0.00991271	0.0190386	1
KIAA2026	0.227063	0.00265533	0.00588641	1
DNAJC18	0.677621	6.67e-16	2.02e-14	1
ANO7	-1.65487	3.63e-10	3.18e-09	1
GRIA3	0.863071	0.00156306	0.00365441	1
ILF3	-0.214094	3.37e-08	1.99e-07	1
PNPLA8	0.236674	0.000366691	0.000980468	1
POLR3C	0.19167	8.85e-06	3.29e-05	1
SLC35F3	-0.979527	2.6e-07	1.29e-06	1
RPS6KB2	-0.219568	0.0038892	0.00828845	1
DCAF16	-0.221	3.65e-05	0.000120355	1
AIMP2	-0.373358	1.56e-06	6.65e-06	1
AP3B2	0.624661	0.000104891	0.000313077	1
MOGAT2	0.422257	0.025746	0.0445616	1
AGAP2	-0.382073	0.00222215	0.00502081	1
COASY	-0.147798	0.0282547	0.0483182	1
CLTC	-0.181821	0.0112298	0.0212817	1
DOT1L	-0.561205	1.29e-12	1.91e-11	1
ZNF521	0.503354	0.00150469	0.00353183	1
MED23	-0.168512	0.0218373	0.03852	1
LMTK2	-0.408915	4.5e-07	2.13e-06	1
GMEB2	-0.301687	1.03e-08	6.72e-08	1
EIF4G1	-0.450619	3.01e-12	4.07e-11	1
CREB5	0.534048	0.000561592	0.0014458	1
FGFRL1	-1.30815	2.55e-18	1.28e-16	1
GZF1	0.229693	1.5e-06	6.43e-06	1
SEC23A	0.89666	1.39e-17	6.04e-16	1
LGALSL	-0.332959	0.000266487	0.00073274	1
PGM2	-0.207341	0.0160634	0.0293435	1
RILPL2	0.548047	2.1e-09	1.57e-08	1
ZNF610	-0.617992	1.2e-11	1.44e-10	1
SORCS1	0.686923	0.00518986	0.0106883	1
ZNF394	0.161476	0.00219774	0.00497177	1
TREX2	0.816904	1.94e-09	1.46e-08	1
EPB41	-0.614267	5.41e-11	5.65e-10	1
ZC3H7B	-0.250169	6.22e-05	0.000194383	1
TTLL12	-0.881705	2.9e-21	2.74e-19	1
KRIT1	0.224071	0.00129951	0.00309158	1
MN1	0.749496	0.000240877	0.00066891	1
ATP1A2	1.40619	4.58e-08	2.64e-07	1
TFB2M	-0.323532	4.02e-06	1.6e-05	1
ZNF229	-0.452982	6.04e-07	2.79e-06	1
ZNF283	-0.268922	7.09e-06	2.68e-05	1
SLC7A5	0.943881	4.24e-06	1.68e-05	1
SPTLC2	-0.242533	0.000120378	0.000355558	1
NELL1	0.585081	0.0218307	0.038512	1
SYMPK	-0.281795	4.59e-06	1.81e-05	1
RTTN	0.378435	5.76e-05	0.000181403	1
NIN	-0.348318	8.23e-07	3.71e-06	1
IFIT5	0.450751	2.15e-05	7.44e-05	1
GALNTL6	-1.09491	3.26e-05	0.000109001	1
CDH1	-0.402533	0.000567247	0.00145873	1
IFIT1	0.47423	0.0168186	0.0305504	1
HSPA5	-0.325974	0.000199716	0.000563813	1
RAB40A	1.16591	1.16e-10	1.13e-09	1
CAD	-0.337612	4.83e-07	2.28e-06	1
GNPTAB	0.52692	0.000225996	0.000631966	1
TMEM245	0.321813	3.3e-05	0.00010988	1
RPA1	0.162088	0.000540634	0.00139555	1
EEF1E1	-0.430564	2.67e-07	1.32e-06	1
FNDC3A	0.246024	0.00896529	0.0174036	1
IGHV3-23	-0.863138	0.0232786	0.0407232	1
FGFR1OP2	0.332409	7.46e-08	4.12e-07	1
SLC9A1	0.487387	1.35e-09	1.05e-08	1
SRPRB	-0.357846	4.95e-05	0.000158306	1
TPO	-2.48375	6.74e-18	3.1e-16	1
UBAP2L	-0.143842	0.0148369	0.0272733	1
TMEM131	-0.249043	0.000223907	0.000626789	1
ST6GAL2	0.946372	4.16e-05	0.00013541	1
AP3D1	-0.267226	3.39e-07	1.65e-06	1
SEMA3D	1.04178	0.000262868	0.000723869	1
HOXA9	-0.66525	2.52e-07	1.25e-06	1
METTL7A	1.05562	1.94e-15	5.28e-14	1
HIF1AN	0.166478	0.000866883	0.00213768	1
BUB1B	-1.30201	8.24e-16	2.44e-14	1
PRRC2A	-0.464688	2.34e-14	5.03e-13	1
CADM1	-0.575309	3.46e-05	0.000114906	1
THUMPD2	-0.224471	0.00232192	0.00521619	1
RGS9	1.44814	8.73e-12	1.08e-10	1
RAB6C	-1.37312	3.71e-21	3.44e-19	1
MPDZ	0.264928	0.00349211	0.00753455	1
MAP1B	1.10978	7.92e-10	6.43e-09	1
PPFIBP2	0.691838	7.91e-10	6.43e-09	1
STAT2	-0.228974	5.62e-05	0.000177398	1
ATP6V1C2	0.660906	0.000258253	0.000712333	1
TM7SF3	0.454951	1.68e-07	8.68e-07	1
MLEC	-0.329545	5.68e-06	2.19e-05	1
NCALD	-0.842793	4.18e-05	0.000136023	1
GCG	-1.31537	0.00165936	0.00385657	1
RGS10	-1.00781	8.2e-17	3.03e-15	1
CHERP	-0.268432	1.36e-07	7.15e-07	1
PTPN3	-0.243733	0.000329534	0.000889896	1
SYT17	-0.771654	1.6e-13	2.83e-12	1
PLD3	0.265668	4.93e-05	0.000157587	1
CCDC171	0.395733	6.21e-06	2.37e-05	1
STAC	1.90058	4.7e-11	4.95e-10	1
SERINC1	0.263742	0.00143833	0.00338901	1
PEX19	0.166521	0.000680878	0.00171997	1
EFCAB13	-0.316486	0.00454878	0.00953206	1
CCDC121	0.164091	0.0274953	0.0471552	1
TMTC4	-1.20162	4.14e-24	6.63e-22	1
SMARCA2	0.221993	0.00760604	0.015031	1
BCL11A	1.32652	8.94e-08	4.87e-07	1
ATE1	0.152997	0.0174168	0.0315374	1
KLF10	0.654332	0.00010952	0.00032589	1
CHN1	0.860731	5.35e-10	4.53e-09	1
LARP4B	-0.292418	1.86e-08	1.15e-07	1
EMILIN3	0.943755	1.74e-07	8.92e-07	1
SLC14A1	1.59908	4.13e-07	1.97e-06	1
CEP112	0.597	3.05e-11	3.36e-10	1
CYP2J2	-1.18537	1.33e-07	7e-07	1
POC1B	0.211484	0.000137701	0.000402047	1
FXYD3	-0.52238	0.00212662	0.00482807	1
ZNF562	-0.273223	2.09e-06	8.74e-06	1
TRMU	-0.29419	0.000998312	0.00242895	1

## Sheet: AggressiveVsNormal_genes_info
Supplementary Table S1A - A complete list of somatic mutated genes found to be significantly differentially expressed in aggressive tumors matched with controls.
Gene name	logFC	P.Value	adj.P.Val	Somatic events
MSRB1	0.39314	2.28e-06	6.99e-06	1
PKNOX2	0.546351	0.00124293	0.00247485	1
APBB2	0.1712	0.0139929	0.0228196	1
KLHL13	1.23789	3.61e-19	6.94e-18	1
DECR1	-0.381614	5.82e-06	1.68e-05	1
ZNF799	-0.204255	0.00373552	0.00681364	2
SALL1	1.10267	4.82e-05	0.000120646	4
ESYT1	0.195448	0.000422601	0.000908928	1
MYO9B	0.153571	0.00272435	0.00510158	1
CRNKL1	-0.165651	0.00158542	0.00310019	1
KLHL14	2.48189	3.45e-27	2.93e-25	1
ZEB1	0.967941	9.77e-12	6.33e-11	1
FAT4	1.20237	9.78e-10	4.8e-09	4
PARN	0.147022	8.44e-05	0.000203399	1
CHD9	0.597932	3.23e-11	1.95e-10	2
PDE1C	2.75589	1.13e-24	6.07e-23	1
BANK1	-0.874222	0.000733917	0.00151826	1
GRM2	-0.638422	1.73e-05	4.66e-05	1
FER1L5	1.02248	1.05e-08	4.48e-08	1
SORL1	0.496143	0.000224357	0.000504941	1
NAT10	-0.184399	4.48e-05	0.000112701	1
RPS6KA5	0.519735	2.29e-08	9.28e-08	1
BRCA1	-0.260841	0.00895605	0.0151693	1
BBS12	0.270411	0.00235958	0.00447257	1
LRGUK	-1.348	5.46e-17	7.44e-16	3
SLC25A46	0.217815	0.000476202	0.00101521	1
TEK	0.456078	0.00111198	0.00223171	1
ALDOC	0.822713	9.78e-14	8.41e-13	1
ZNF212	-0.21249	4.76e-06	1.39e-05	1
PRDM2	0.262862	1.73e-05	4.64e-05	1
ZNF83	-0.369748	3.55e-05	9.06e-05	1
SEL1L3	-0.702528	5.04e-09	2.24e-08	3
DUSP4	1.00925	2.9e-06	8.76e-06	1
ROR2	1.8057	3.07e-19	5.98e-18	1
MAOA	-0.576098	2.64e-05	6.9e-05	2
GYPC	1.00231	2.97e-12	2.07e-11	1
HIST1H2AD	-1.39617	9.16e-12	5.97e-11	1
DUS3L	-0.28566	0.000176111	0.000404005	2
GCC2	-0.213855	0.0189161	0.0300505	1
FNDC1	-0.766949	0.00348379	0.00640072	2
CD82	0.750127	8.19e-13	6.18e-12	1
PMM1	-0.312743	0.00152923	0.00300082	1
INTS1	-0.378395	5.82e-08	2.23e-07	1
MMP16	0.981043	4.46e-07	1.51e-06	1
CAMTA1	0.271064	1.29e-06	4.08e-06	2
SEC14L1	-0.182637	0.0265255	0.0409906	1
CHFR	-0.35635	6.38e-11	3.7e-10	1
PIK3CB	-0.212777	0.00802923	0.0137193	2
TF	0.887534	0.000729004	0.0015086	1
DNAH11	0.682214	0.00139913	0.00275992	1
POLG	-0.261919	1.77e-07	6.35e-07	1
ADAM23	0.759957	1.51e-05	4.09e-05	1
RAG1	1.00568	1.47e-08	6.11e-08	4
SNAPC1	0.579437	2.01e-23	8.34e-22	1
UNC13B	-0.482046	7.32e-06	2.08e-05	1
SLITRK4	0.996006	0.00100125	0.00202404	2
CACNB1	0.719574	2.51e-07	8.79e-07	1
QKI	0.403433	2.02e-05	5.37e-05	1
KDM6A	-0.316215	0.00115542	0.00231386	2
MAN2B1	-0.424107	7.8e-09	3.4e-08	1
PDP1	-0.411798	1.69e-05	4.54e-05	2
KDM4B	-0.493499	1.39e-12	1.01e-11	2
CNTN2	1.13977	4.32e-07	1.47e-06	2
AGPS	0.84698	4.95e-13	3.86e-12	2
LTBR	-0.239492	0.000313865	0.000689792	2
ARHGAP15	0.454899	0.00186844	0.00360541	1
TDRKH	-0.207422	0.0268063	0.0413654	2
ANKLE2	-0.0816672	0.0310104	0.0471851	1
DOCK11	0.348774	0.00919992	0.0155381	2
RPRD1B	-0.354853	6.28e-07	2.09e-06	1
DNHD1	-0.447335	0.000359133	0.000781359	1
ADRA1A	2.47232	3.59e-20	8.09e-19	2
FKBP4	-0.372206	2.86e-05	7.43e-05	1
GIPR	0.830442	0.00015762	0.000365132	1
E4F1	-0.449683	4.48e-09	2.01e-08	1
DLEC1	0.638738	0.000102484	0.000243404	2
IRX3	0.625736	3.07e-06	9.23e-06	1
RBM6	-0.457426	3.16e-07	1.09e-06	1
KLF4	0.344385	0.017726	0.0282867	1
HDAC3	-0.17538	6.79e-05	0.00016605	3
KRCC1	0.175853	0.0103766	0.0173395	1
HID1	-0.787705	5.16e-18	8.33e-17	1
GOT2	0.301742	0.000581459	0.00122291	1
NFYC	0.140752	0.000118273	0.000278606	1
PPARGC1A	2.4736	3.85e-29	4.61e-27	1
ETFA	-0.312776	1.51e-05	4.11e-05	1
ZNF146	-0.49462	3.36e-14	3.08e-13	2
KLHL6	-0.613471	0.000247422	0.000552331	1
GJB5	2.76243	2.46e-17	3.54e-16	1
TTC13	-0.368531	3.38e-08	1.34e-07	1
CENPJ	0.149396	0.0316492	0.0480896	1
ITSN1	0.747907	3.45e-21	9.54e-20	3
EHBP1L1	0.777754	1.63e-11	1.02e-10	1
MRTO4	-0.331216	8.44e-07	2.76e-06	1
MUC2	-1.37806	0.000174638	0.000400826	1
SRMS	-1.62782	3.2e-11	1.94e-10	1
VWCE	1.6852	5.73e-24	2.67e-22	1
PREX2	0.721074	2.18e-06	6.68e-06	1
LDLR	0.395111	0.00847702	0.0144269	2
TANC2	-0.211291	0.0316206	0.0480501	1
PGM1	0.539636	9.91e-11	5.59e-10	1
CPD	-0.224536	0.00937755	0.015812	2
SNCAIP	0.815431	1.8e-05	4.82e-05	2
TANK	0.270148	2.15e-06	6.6e-06	1
DNAJB4	1.37424	4.09e-20	9.09e-19	1
TMEM189	0.394271	5.67e-08	2.18e-07	1
BICD1	-1.70775	2.56e-27	2.22e-25	2
CASP1	0.956801	1.64e-10	8.95e-10	1
LRP1B	2.27403	6.03e-19	1.11e-17	10
ICA1L	0.83844	3.43e-21	9.52e-20	1
SECTM1	0.50319	0.00781838	0.0133838	1
B2M	0.319017	0.00366934	0.00670885	1
YTHDC2	-0.312555	0.000120207	0.000282634	1
IGHV3-21	-1.06763	0.00511973	0.00908574	1
INPP5B	0.527075	3.74e-14	3.41e-13	1
TLR5	0.620227	2.07e-09	9.73e-09	1
ERMARD	-0.138414	0.0141134	0.0229937	1
TRAIP	-0.478576	2.72e-08	1.09e-07	1
KIAA0368	-0.468659	9.76e-18	1.51e-16	1
TYMS	-0.281229	0.00920222	0.0155406	1
ZNF750	2.06943	5.65e-14	5e-13	2
BTBD10	0.106161	0.0177788	0.0283612	1
ZNF551	0.195287	0.0155968	0.0251856	1
EPB41L3	1.28265	1.76e-15	1.92e-14	3
WSB1	-0.41353	2.1e-05	5.56e-05	1
SRRD	0.109016	0.0116851	0.0193558	2
MAP6	0.529672	1.64e-07	5.91e-07	1
PPP6R2	-0.382262	1.58e-09	7.55e-09	1
APOL1	0.867712	2.34e-08	9.48e-08	1
ITGA2	1.38023	8.43e-20	1.79e-18	1
ACTRT3	0.862737	2.02e-16	2.54e-15	1
MME	1.50975	4.79e-08	1.86e-07	3
MAST4	0.783871	7.28e-12	4.81e-11	1
SGSM3	-0.461515	1.48e-07	5.37e-07	1
NR4A3	1.54121	4.35e-07	1.47e-06	1
ZNF839	-0.275815	4.25e-06	1.25e-05	1
TMEM132A	-1.86865	2.04e-32	5.54e-30	1
C19orf44	0.163194	0.00543008	0.00959401	1
MCAT	-0.408055	2.78e-07	9.68e-07	1
ARID1B	0.135013	0.0215299	0.0337863	3
BAIAP2L2	-1.61345	2.35e-10	1.26e-09	1
EPN1	-0.321877	1.71e-05	4.6e-05	1
PSRC1	0.281781	0.00543403	0.00959916	1
KIF5C	-0.541502	8.12e-06	2.29e-05	1
CLCNKB	2.01197	2.69e-22	9.15e-21	2
DDX50	0.21546	5.93e-08	2.27e-07	2
RERGL	0.999122	8.92e-06	2.51e-05	1
GALNT10	-0.551524	3.71e-09	1.68e-08	1
DPP6	1.56024	2.18e-06	6.68e-06	1
MMP24	0.554338	1.33e-05	3.64e-05	1
GRID1	0.962066	1.02e-08	4.35e-08	1
ACER3	-0.394993	0.00812099	0.0138632	1
KLHDC1	0.620002	7.3e-12	4.81e-11	1
RNF217-AS1	0.991143	2.53e-15	2.68e-14	1
ZNF287	0.208502	0.000224221	0.000504696	1
RFK	-0.39078	3.31e-07	1.14e-06	1
DNAJB11	-0.326101	1.48e-07	5.35e-07	1
GBA2	-0.217268	0.000309084	0.000679771	1
GRIN3A	-1.62743	3.45e-06	1.03e-05	2
ADGRG1	0.468436	3.46e-06	1.03e-05	1
ZNF165	-0.198908	0.0190272	0.0302063	1
ITGA10	-0.412099	0.00220555	0.00420219	2
ANXA2	1.28716	2e-20	4.81e-19	1
MCF2L	-0.569165	2.37e-11	1.46e-10	1
ACSS3	1.65331	4.6e-22	1.51e-20	1
PTPN23	-0.233806	2.67e-05	6.96e-05	1
CACNA1C	0.808227	2.12e-08	8.62e-08	4
PLBD2	-0.26499	0.000273262	0.000606195	1
ALDH1L1	0.743039	0.00174005	0.00337676	1
SLC12A7	-0.68396	8.55e-26	5.53e-24	1
MDC1	0.183507	0.00224126	0.00426408	1
ATP11B	-0.631457	4.14e-10	2.14e-09	3
NLGN4X	0.616534	0.00996419	0.0167231	1
EXOC4	0.150809	0.00137034	0.00270747	2
TRMT1	-0.480189	4.94e-09	2.2e-08	1
AXL	0.783002	8.54e-09	3.69e-08	1
TELO2	-0.626658	1.04e-12	7.72e-12	2
PCDHB14	-0.340851	0.00406223	0.00735135	1
SHE	0.600651	3.24e-06	9.71e-06	1
ANO4	1.81072	9.34e-16	1.06e-14	2
PIK3C2B	0.188787	0.0195349	0.0309562	1
C6orf89	0.217941	6.64e-08	2.53e-07	1
RNF31	-0.203523	0.00618377	0.0107952	1
SH3TC2	0.412749	0.0132642	0.0217195	1
PRMT5	-0.223696	0.00041409	0.000891588	2
DCAF4	-0.194665	8.61e-05	0.000207003	1
ETV3	0.332202	3.71e-05	9.44e-05	2
ALOX5AP	0.437308	0.00280677	0.00524363	1
ANKH	-0.381667	0.00125026	0.00248837	2
POLR1B	-0.428686	7.25e-10	3.63e-09	1
TACC1	1.01944	1.32e-16	1.69e-15	1
SH3PXD2B	1.20729	2.56e-23	1.04e-21	1
SNX18	0.331335	1.73e-06	5.37e-06	1
NLK	-0.186469	0.001062	0.00213721	1
EGFR	0.466335	1.76e-06	5.46e-06	3
ZNF285	-0.524222	5.59e-12	3.75e-11	1
FARP2	-0.200118	0.00777605	0.0133163	2
MAPKAPK3	-0.323019	3.29e-05	8.45e-05	1
PRKD2	-0.148288	0.0102528	0.0171576	2
ZFP36L1	0.989768	1.69e-15	1.84e-14	1
NKX3-1	-1.36338	1.5e-18	2.63e-17	1
DHX38	0.215272	0.000398357	0.000860803	2
SKIV2L2	0.394876	6.44e-10	3.25e-09	3
TARS2	-0.219312	1.19e-05	3.29e-05	2
LRRC49	0.393618	6.71e-08	2.56e-07	2
AGL	0.501887	1.02e-11	6.62e-11	1
PSD4	-0.495955	2.29e-11	1.42e-10	1
CCNB1IP1	0.291703	6.9e-05	0.000168398	1
TTL	-0.188168	0.00318735	0.00589428	1
STAT5B	0.634552	6.82e-30	1.01e-27	1
C14orf79	-0.265001	0.000860362	0.00175832	1
SHISA4	0.31521	0.000248764	0.000555107	1
TBL1XR1	-0.48975	8.7e-09	3.75e-08	1
COMP	-3.10693	3.33e-20	7.6e-19	2
ABCC5	-0.360699	0.00039403	0.000852051	2
HCFC2	0.489515	6.45e-13	4.93e-12	3
PTPRG	0.280542	0.00648945	0.0112893	2
NCOR1	0.19064	0.00888008	0.0150559	3
MOCOS	0.725512	8.65e-11	4.92e-10	1
SLC16A4	1.13527	2.33e-18	3.95e-17	1
CCNE2	-0.954872	2.07e-14	1.95e-13	1
CDC45	-1.68459	4.09e-21	1.11e-19	1
ABHD8	0.432916	1.56e-06	4.87e-06	3
IER5	0.984838	6.93e-12	4.59e-11	1
SYNE1	0.654123	8.46e-06	2.38e-05	7
MTHFD1L	-0.739398	4.62e-09	2.07e-08	1
GRPR	-1.60086	8.61e-07	2.81e-06	1
SYT11	0.855127	2.41e-08	9.75e-08	1
LRMP	1.14506	3.03e-12	2.11e-11	1
ATP2B4	1.6952	1.12e-22	4.07e-21	3
NUMB	0.138745	0.002599	0.00488868	1
NSFL1C	0.187635	5.13e-06	1.49e-05	1
ITGAX	-1.02654	4.4e-12	3e-11	1
SPATA6L	0.374754	0.0121817	0.0201043	1
SRPX	1.57143	5.07e-17	6.94e-16	1
MBNL3	0.854065	1.46e-08	6.07e-08	1
CROCCP2	-0.325616	0.000940364	0.00190953	2
SOX6	0.603638	6.38e-05	0.000156504	2
ZFYVE16	-0.24443	0.00153563	0.00301113	1
POLE	-0.331747	1.67e-08	6.89e-08	2
TBC1D22A	0.231841	2.14e-05	5.65e-05	1
TNFRSF18	-0.834608	5.31e-06	1.54e-05	1
TRPM3	1.8182	2.7e-17	3.87e-16	1
CA8	0.78373	0.00227537	0.00432406	1
DNAH8	-2.60538	2.1e-15	2.26e-14	4
CDCA2	-1.21047	3.74e-12	2.56e-11	2
ACP1	-0.23684	8.01e-07	2.63e-06	1
PTGFRN	0.320087	1.34e-05	3.68e-05	1
DAGLA	0.351914	0.00414721	0.00749189	1
TBC1D15	-0.257598	3.2e-06	9.6e-06	1
ARPC5L	-0.403186	3.28e-09	1.5e-08	1
ZMIZ2	-0.391701	6.1e-12	4.07e-11	1
DMD	1.61148	1.38e-17	2.07e-16	2
ADCY2	0.571568	0.00149449	0.00293733	2
KLHL20	0.23432	0.0159062	0.0256358	2
CDH19	1.74875	1.24e-07	4.53e-07	1
SSH3	0.521581	3.77e-12	2.59e-11	2
CCBE1	2.70989	8.24e-24	3.65e-22	1
PER1	0.992905	4.57e-10	2.35e-09	1
SH3RF1	-1.27909	5.37e-19	1e-17	1
MED26	-0.232942	1.21e-06	3.84e-06	1
DUS1L	-0.882839	2.77e-15	2.92e-14	1
DDO	1.46608	1.79e-17	2.64e-16	1
DCHS1	0.878284	4.91e-08	1.91e-07	1
IGSF6	-0.312838	0.0295282	0.0451424	1
CD200R1	0.439126	0.0244166	0.0379671	1
ADNP	-0.207601	9.89e-05	0.000235403	1
GSTM5	2.11083	3.63e-24	1.76e-22	1
RFFL	-0.369134	9.39e-07	3.04e-06	1
ZNF689	0.194104	0.000134369	0.000313675	1
NLRP12	-2.0971	9.34e-16	1.06e-14	1
DEK	0.209299	0.000425319	0.000914228	1
SORBS3	0.496113	9.17e-08	3.42e-07	1
DOPEY1	0.549032	4.94e-09	2.2e-08	1
GSE1	-0.335619	3.13e-05	8.07e-05	1
COL11A1	-1.19026	0.000414995	0.000893403	4
UBAP2	-0.426136	1.2e-12	8.87e-12	1
CDKN2AIPNL	-0.314913	3.53e-05	9.01e-05	1
CKMT2	1.49292	1.53e-17	2.29e-16	1
NBPF14	-0.217903	0.00548786	0.00968773	1
MYLK3	0.721141	0.000412845	0.000889294	1
LONRF1	0.420294	7.54e-06	2.14e-05	2
ZSWIM3	-0.282886	4.73e-05	0.000118448	1
ZNF804A	1.78661	3.34e-15	3.48e-14	1
FUT2	1.50464	2.64e-12	1.85e-11	1
FZD4	-0.301703	0.0116718	0.0193406	5
PDK3	0.257734	0.0115428	0.0191442	1
IRF9	-0.656726	4.06e-06	1.2e-05	1
MYO1D	-0.389376	1.18e-07	4.33e-07	2
SLC25A23	0.34375	1.63e-07	5.87e-07	1
CCDC178	2.1564	5.38e-22	1.74e-20	2
DDX56	-0.319826	2.2e-07	7.77e-07	1
AOX1	2.76932	4.45e-34	1.82e-31	2
EEA1	0.21015	0.00844959	0.0143869	1
KLK3	-1.30381	3.11e-10	1.64e-09	1
XPO7	0.330295	2.75e-08	1.1e-07	1
GPR75	0.997465	4.48e-10	2.31e-09	1
ARHGAP11B	-0.650334	9.58e-08	3.57e-07	1
SLC38A11	-0.976928	0.000359746	0.000782599	2
FLVCR2	0.235953	0.031714	0.0481802	1
SMAD6	0.810572	2.72e-10	1.44e-09	1
RPP38	-0.164036	0.001171	0.00234301	1
DNASE2B	-1.83597	6.1e-11	3.55e-10	1
SRSF12	-0.341113	0.00369435	0.0067479	1
FANCD2	-0.658607	9.18e-15	9.03e-14	1
TRMT2A	-0.434113	2.44e-08	9.83e-08	1
MEF2C	0.815721	8.29e-08	3.11e-07	1
KCTD14	2.4356	1.46e-28	1.53e-26	1
SLC44A4	-0.866117	2.74e-15	2.89e-14	1
ESPL1	-1.58193	4.74e-20	1.05e-18	1
TBC1D19	0.306078	5.5e-08	2.12e-07	1
ERBB4	1.24765	2.33e-08	9.42e-08	3
ZAP70	-0.545732	0.00345409	0.00634932	3
ZNF485	-0.800792	1.22e-23	5.29e-22	1
LPP	0.896098	1.22e-17	1.85e-16	1
ORC3	0.268675	3.56e-05	9.08e-05	1
HIVEP1	-0.36161	0.00139851	0.002759	1
ANKRD34B	-3.49733	1.75e-10	9.52e-10	1
WWC2	0.513981	1.1e-05	3.05e-05	1
TRAF3IP2	1.09032	3.4e-22	1.13e-20	1
CHRDL1	2.31853	1.97e-21	5.67e-20	1
LAMA2	0.556121	0.00129342	0.00256568	1
SLTM	-0.112482	0.00216901	0.00413645	2
GAL3ST3	1.31439	5.32e-08	2.05e-07	1
APOBEC3D	1.60633	5.57e-19	1.03e-17	1
MEX3B	-0.470053	0.00105233	0.00211914	1
NID1	0.956116	1.66e-09	7.88e-09	1
FBXO16	0.445263	1.19e-06	3.8e-06	1
TUBGCP3	0.230571	2.26e-06	6.93e-06	1
ZNF783	-0.660657	3.89e-16	4.67e-15	1
CCDC110	-0.962369	2.33e-13	1.9e-12	1
CLGN	-0.748326	3.17e-05	8.16e-05	1
TFDP2	0.262765	1.5e-06	4.71e-06	1
SPATA5L1	-0.169489	0.00228644	0.00434241	1
MMRN2	0.39687	0.000875874	0.00178744	1
DSP	-0.196878	0.0309484	0.0471026	2
ZNF230	0.189177	8.05e-05	0.000194449	3
MSN	0.854493	8.35e-12	5.46e-11	1
THOC5	-0.150304	0.0284533	0.0436547	1
SLC9A5	-0.563302	2.83e-05	7.34e-05	1
SERINC3	0.131611	0.00151974	0.00298345	1
EPDR1	0.436275	0.000160825	0.000371574	1
ZNF347	0.138238	0.0073577	0.0126493	1
SLC39A14	0.351466	2.04e-05	5.43e-05	1
PSMA1	-0.158007	0.0012241	0.00244079	1
NOS1	2.1496	2.59e-13	2.09e-12	3
CA14	3.14759	1.44e-41	1.66e-38	1
BMPR1A	0.429302	5.45e-10	2.78e-09	1
ACACA	-0.857458	3.65e-16	4.39e-15	2
ABCG1	-0.848088	5.81e-16	6.79e-15	1
MOB3C	0.677539	4.89e-19	9.2e-18	1
SMAD3	0.56268	6.6e-14	5.81e-13	1
ZCCHC4	0.173938	0.000435599	0.000934266	1
MRVI1	1.54403	8.24e-17	1.1e-15	1
CCDC39	-0.609841	3.84e-06	1.14e-05	1
DDX27	-0.135891	0.000942962	0.00191397	1
ASB8	0.10683	0.00698114	0.0120559	1
COQ7	-0.212934	2.28e-05	6e-05	1
NEDD4	0.534862	2.3e-06	7.04e-06	1
ZNF43	-0.294825	4.4e-05	0.00011082	1
MRPL19	-0.18819	0.00223315	0.00424998	1
RAP1GAP2	-0.910061	1.69e-11	1.06e-10	1
ZNF154	1.71988	2.36e-26	1.72e-24	1
GOLGA2P5	-0.402104	0.00111218	0.00223187	1
LINC00969	-0.490754	0.000126103	0.000295314	1
PI4KA	-0.149064	0.0197048	0.0311985	2
ZC3H3	-0.296181	3.19e-05	8.21e-05	1
TIPARP	0.898072	5.91e-11	3.45e-10	1
CKB	0.568995	6.81e-05	0.000166497	1
IPO8	0.244026	1.17e-06	3.73e-06	2
PCDHB8	-2.01421	4.85e-09	2.16e-08	1
PIBF1	0.356455	2.6e-07	9.08e-07	1
CLK2	-0.318693	2.65e-06	8.06e-06	2
CCSER1	-0.399195	0.000219473	0.00049528	2
KIF18B	-2.34654	5.75e-29	6.71e-27	1
PIK3C3	0.298881	6.43e-09	2.83e-08	1
NEFM	2.30484	1.19e-11	7.62e-11	2
ANKRD28	-0.25897	6.95e-06	1.98e-05	3
CXCR2	2.92545	5.99e-27	4.84e-25	1
CHD6	-0.321129	6.39e-05	0.000156753	4
CD40	1.45831	3.79e-20	8.48e-19	1
FAT2	2.24603	2.34e-17	3.39e-16	6
DYNC1LI2	0.305238	0.00618172	0.0107927	1
EFCAB7	0.188249	0.00233499	0.0044296	3
CS	-0.320688	1.91e-10	1.03e-09	2
FAM135A	0.407791	0.0141915	0.0231037	1
EHMT2	-0.181415	0.000235758	0.000528278	1
ECE2	-0.667979	8.62e-10	4.26e-09	2
PACS2	-0.149151	0.00558752	0.0098495	1
UBQLNL	0.564909	0.00130639	0.00259002	2
AQP4	0.940415	8.2e-07	2.68e-06	1
KIFC1	-1.61164	3.58e-25	2.1e-23	2
DHRS13	-0.350454	0.00261875	0.0049213	1
FADS2	1.63399	2.71e-10	1.44e-09	1
ENAH	0.519099	2.22e-11	1.38e-10	1
ATP2C1	-0.660485	3.67e-12	2.52e-11	1
CYP4F3	1.81974	4.58e-14	4.11e-13	1
CROT	0.5457	1.59e-08	6.6e-08	1
PABPC3	-0.664268	2.39e-07	8.41e-07	1
OTX1	-2.80126	8.38e-26	5.46e-24	1
STOX2	1.83088	1.34e-26	1.02e-24	1
DNAH1	-0.663739	4.08e-09	1.84e-08	2
SELE	1.30004	0.000162867	0.000375776	1
PSMC6	-0.132889	0.00156165	0.00305791	1
MSI1	-1.10493	1.01e-21	3.08e-20	1
USP54	-0.625358	1.89e-08	7.73e-08	1
CCDC81	0.8578	1.64e-12	1.19e-11	2
ACCS	-0.462925	0.000186569	0.000426352	1
SV2B	1.80605	1.99e-11	1.24e-10	1
ABCA8	0.53492	0.00283104	0.00528413	1
NDUFS2	-0.141009	0.0069308	0.0119779	1
LEF1	-0.67722	0.000201193	0.000457219	1
PEAK1	1.1697	7.93e-15	7.85e-14	1
RNF113A	-0.153074	0.021917	0.0343587	1
SATB2	-0.3346	0.00101603	0.00205099	1
ANXA6	1.41243	1.22e-24	6.5e-23	1
SLC25A13	-0.3318	2.14e-05	5.65e-05	1
NCCRP1	1.91769	1.35e-13	1.14e-12	1
SPON1	1.6972	3.17e-17	4.49e-16	1
PLA2G4A	1.35703	1.21e-17	1.85e-16	1
ZNF516	1.61887	9.61e-22	2.96e-20	2
ABCC3	1.04431	9.33e-07	3.03e-06	1
RRAGA	0.334654	2.22e-12	1.57e-11	1
ZNF518A	-0.175622	0.0267404	0.0412775	3
UBXN10	2.46906	1.68e-26	1.25e-24	1
SYNJ2	-0.437089	9.62e-08	3.58e-07	1
ROBO1	1.21512	5.49e-15	5.59e-14	2
ATN1	0.18911	0.000902626	0.00183817	1
ARSB	0.356412	4.15e-05	0.000104731	2
SEZ6L2	-0.585305	9.92e-05	0.00023617	1
EGFLAM	0.856032	9.47e-09	4.05e-08	1
VPS11	0.273973	5.42e-09	2.4e-08	1
FBXO5	-0.357659	7.84e-07	2.58e-06	1
OXR1	0.659712	1.86e-13	1.53e-12	1
NPIPA1	-0.343422	0.00608736	0.010638	1
TNKS	0.374791	1.04e-06	3.36e-06	1
TICRR	-0.691317	6.03e-07	2.01e-06	1
PYCR1	-1.52992	9.08e-38	6.2e-35	1
SUMF2	0.306139	3.15e-05	8.11e-05	1
CDH6	0.396105	0.0154307	0.0249414	2
GRHL3	0.941164	6.48e-07	2.15e-06	2
KLHL4	2.12906	6.46e-21	1.7e-19	2
RBL2	0.233888	0.0187963	0.0298706	3
CSE1L	-0.148432	0.00385608	0.00701341	1
U2AF1	-0.712459	0.00542222	0.00958303	1
PFKM	0.214859	0.0209476	0.0329653	1
SGMS1	-0.187019	0.0197665	0.0312882	1
TTC7A	0.438368	6.3e-11	3.66e-10	1
NAGS	1.10733	6.22e-19	1.15e-17	1
ELP3	0.781197	5.58e-25	3.16e-23	1
GPAT2	0.877989	4.79e-05	0.000119942	1
SLC35C2	-0.320023	4.93e-09	2.2e-08	1
FRMPD2	-0.416934	0.0235196	0.0366715	2
CCT6P3	-0.455801	9.9e-07	3.2e-06	2
C7	1.41126	8.28e-09	3.59e-08	1
S100A8	1.15859	1.45e-06	4.58e-06	1
SULT4A1	-1.31133	0.000948262	0.00192366	1
MTUS1	0.562009	9.52e-12	6.18e-11	2
CPQ	0.698554	2.44e-11	1.5e-10	1
POLQ	-1.49469	9.53e-17	1.25e-15	2
DIMT1	0.268098	1.06e-06	3.42e-06	1
F8	0.378449	9.95e-05	0.000236777	3
KPNA5	0.424605	2.21e-06	6.79e-06	1
TXNIP	0.727515	8.64e-12	5.64e-11	2
SLC9B2	0.721556	6.7e-07	2.21e-06	1
KIF3B	-0.22353	0.000219745	0.000495772	1
NSDHL	0.50093	9.4e-14	8.09e-13	1
KANSL1L	0.417491	5.81e-07	1.94e-06	2
ZCCHC14	0.294504	1.85e-05	4.93e-05	2
DNAH2	-0.654669	1.9e-05	5.06e-05	3
CACNA2D3	1.19113	6.34e-13	4.85e-12	1
CLDN12	-0.304942	0.000290489	0.000641846	1
WDR31	0.222415	0.00142663	0.00281056	1
IVNS1ABP	0.463988	1.08e-10	6.05e-10	1
ACSS1	-0.81441	5.05e-20	1.11e-18	1
EEF2	-0.566674	2.19e-13	1.79e-12	1
ZDHHC11	-1.22899	2.88e-10	1.52e-09	1
EPHA3	0.655246	0.000699744	0.00145213	4
P4HA2	0.794364	1.37e-15	1.51e-14	2
EDIL3	1.12969	1.03e-10	5.78e-10	1
B3GALT4	0.708523	1.88e-11	1.18e-10	1
SERGEF	-0.476543	3.96e-06	1.17e-05	1
PEX2	0.354217	5.8e-08	2.23e-07	2
DSC3	1.87043	6.44e-11	3.73e-10	1
B3GNT3	1.87167	1.41e-08	5.9e-08	1
PCDH1	-0.333906	0.000972086	0.00196938	1
CAPZA1	-0.155794	0.00235631	0.00446821	1
ITGA2B	0.496989	0.00100736	0.00203503	1
ZNF512	0.427668	8.5e-05	0.000204634	1
SDAD1P1	0.659308	1.3e-11	8.29e-11	1
ELP5	0.288116	2.29e-05	6.03e-05	1
TCN1	0.933235	0.0169426	0.0271565	1
USP31	0.218963	0.00801583	0.0137002	3
PYGL	1.09386	3.12e-10	1.64e-09	1
CDH22	1.60493	1.86e-07	6.65e-07	1
DGKI	0.629247	9.68e-05	0.000230939	2
MCOLN1	-0.173168	0.00233429	0.00442874	1
COL4A4	0.872621	6.22e-07	2.07e-06	1
SP1	0.134995	0.0162015	0.0260798	2
HSPA9	-0.293544	1.94e-07	6.91e-07	1
MYO15A	0.5928	9.12e-07	2.96e-06	2
UTP3	-0.274637	3.36e-08	1.33e-07	1
RUSC1	-0.642002	7.85e-16	8.99e-15	1
NUP160	0.199859	0.00351465	0.00645484	1
ATAD3C	1.69602	6.41e-20	1.39e-18	1
PSAT1	-0.77257	9e-09	3.87e-08	1
TBC1D1	1.05304	1.06e-20	2.69e-19	1
IQGAP1	0.513827	5.64e-12	3.79e-11	1
CCDC82	0.755853	2.72e-15	2.88e-14	1
NPEPL1	-0.50265	2.26e-05	5.95e-05	1
TP53INP1	-1.17597	2.24e-23	9.18e-22	1
BAZ2A	-0.264457	0.000437394	0.000937679	1
ZSCAN25	0.233691	2.57e-05	6.72e-05	1
DPH2	-0.606163	8.17e-20	1.75e-18	1
NGLY1	-0.287324	3.72e-08	1.46e-07	1
AKAP9	-0.39312	2.61e-05	6.81e-05	2
SLC20A1	-0.316274	1.53e-05	4.15e-05	1
UNC93A	-0.851329	0.000654542	0.00136478	1
SNX30	-0.213722	0.0128682	0.0211238	1
C21orf62	2.04626	9.74e-16	1.1e-14	1
TSG101	-0.15096	0.000414104	0.000891588	1
NOB1	-0.182545	0.0190121	0.0301874	1
CLEC1A	0.466268	0.000898648	0.00183088	1
SHROOM3	-0.383399	9.72e-05	0.00023181	1
ISM2	1.37191	6.96e-08	2.64e-07	2
TRIM38	0.494054	2.66e-05	6.93e-05	1
LRRC7	-1.25876	3.42e-07	1.18e-06	1
PCDHB16	-1.22645	4.67e-07	1.58e-06	1
SMU1	0.115058	0.000707667	0.00146725	1
CASZ1	-0.392893	1.48e-06	4.67e-06	1
CXCL1	1.15532	0.000325513	0.000713604	1
EPM2A	0.918768	1.51e-25	9.49e-24	1
NIT1	0.190489	0.000105448	0.000249993	1
MAP2	-0.498137	0.0112307	0.0186619	3
NOS3	-0.484528	0.000443903	0.000950969	1
GSTM3	2.22939	5.52e-40	5.35e-37	1
SPRY3	1.10631	2.49e-12	1.76e-11	1
ANAPC5	-0.455182	1.19e-14	1.16e-13	1
SLC12A5	-1.20275	3.39e-09	1.55e-08	2
PHF14	-0.454041	4.83e-13	3.77e-12	1
PRMT3	-0.267609	2.94e-05	7.61e-05	2
GCNT4	2.31555	8e-36	4.21e-33	1
BCDIN3D	-0.131343	0.0167659	0.0269061	1
HSPH1	0.321956	0.000452581	0.000967873	1
COL17A1	2.73023	9.1e-17	1.2e-15	3
KIAA1614	1.22262	2.98e-18	4.97e-17	5
FAM83F	0.395744	0.00934856	0.0157675	2
XG	1.77192	1.56e-12	1.13e-11	1
SUGP2	-0.383026	1.92e-09	9.07e-09	2
PCDH9	1.58149	6.56e-16	7.62e-15	1
ADAMTS13	-0.530795	9.32e-06	2.61e-05	3
TUBG2	0.752504	1.77e-17	2.62e-16	1
GBP3	0.713932	0.00147096	0.00289233	1
CSNK1G3	-0.171864	0.00402531	0.00728955	1
RBMX	-0.207805	8.34e-07	2.73e-06	1
COBL	-0.339264	0.000547011	0.00115507	1
CTNNAL1	-0.297281	0.000290516	0.000641846	2
CIT	-1.11776	3.43e-17	4.84e-16	2
FOXN1	0.938541	1.6e-05	4.33e-05	1
PHF20L1	-0.147781	0.0236478	0.036862	1
MCM3AP	-0.370396	1.84e-10	9.96e-10	1
ITGA9	1.34174	4.99e-17	6.84e-16	1
SLC25A28	0.179263	0.0070834	0.0122107	1
CCDC85A	1.87212	5.43e-19	1.01e-17	1
ZFHX3	0.302179	0.00113381	0.00227293	4
PGBD2	-0.151991	0.00440511	0.0079236	1
SHISA2	-0.899659	0.000722359	0.00149602	1
TBCK	0.195455	0.00141464	0.00278903	1
KLK1	1.25043	1.13e-06	3.63e-06	1
CKAP5	-0.187354	0.00399091	0.00723648	1
ANK3	-0.306593	0.0162416	0.026142	3
SIX1	-1.42928	1.44e-18	2.53e-17	2
ZBTB44	-0.174571	0.00746046	0.012814	2
SHC4	0.79174	6.27e-08	2.4e-07	1
HIST2H2BF	-1.17977	3.23e-08	1.28e-07	2
HSD11B1	1.3384	1.2e-11	7.66e-11	1
SETX	0.178211	0.00716885	0.0123442	2
ZNF579	-0.427654	9.23e-06	2.59e-05	1
DOCK3	1.38482	1.77e-17	2.62e-16	4
THSD4	1.05221	7.43e-10	3.71e-09	2
KCNJ5	1.71295	1e-18	1.8e-17	1
LMNA	0.536074	6.24e-07	2.07e-06	1
TBCD	-0.374213	2.14e-10	1.15e-09	1
PEG10	1.85053	6.2e-13	4.75e-12	1
APLF	0.863927	1.94e-12	1.39e-11	1
GSDMD	0.501559	0.00251613	0.00474103	1
AHNAK2	1.78775	1.69e-18	2.92e-17	5
TRPS1	0.61051	1.42e-07	5.15e-07	2
ADAMTS5	1.89511	2.15e-19	4.3e-18	1
C1orf116	-1.00573	2.26e-16	2.8e-15	1
ZKSCAN7	0.538816	3.53e-06	1.05e-05	1
PCDHGA6	-0.467631	0.00146254	0.0028767	1
MTMR3	-0.204621	0.000942877	0.00191397	2
TRIM25	-0.337251	0.000331817	0.000726697	1
SDCBP2	0.763813	2.58e-06	7.85e-06	1
HOXB2	1.47952	2.15e-17	3.13e-16	1
AP4E1	0.349851	8.78e-08	3.28e-07	1
GAD1	-1.14218	6.71e-09	2.95e-08	1
VAV3	1.30845	5.71e-15	5.8e-14	2
SUOX	-0.17133	0.0156223	0.0252224	1
PCDHGB1	-1.61978	8.35e-11	4.76e-10	1
ZNF678	-0.293873	4e-05	0.000101387	1
SLC27A5	-0.378884	0.000720052	0.00149158	1
BTG3	0.876674	1.97e-15	2.14e-14	1
ATP2B1	-0.288745	0.000264604	0.000588336	1
MS4A14	-0.562008	0.00154444	0.00302713	2
GARS	-0.520239	4.22e-15	4.35e-14	1
CAMK2N2	-1.43128	4.37e-14	3.94e-13	1
MDM4	-0.261284	0.000207766	0.000470878	2
HELQ	0.366684	2.24e-16	2.78e-15	2
ZNF638	-0.121956	0.00367026	0.00670987	2
ACTN4	0.462821	9.86e-14	8.47e-13	1
TACC2	0.168797	0.0147685	0.0239425	4
HSPB1	1.20399	2.11e-12	1.5e-11	1
INPP5E	-0.189412	0.0053026	0.00938857	1
STK32C	-0.632616	7.17e-11	4.13e-10	1
CACNA2D1	0.990097	2.53e-07	8.87e-07	1
ANKRD13B	-0.790429	1.05e-09	5.14e-09	1
NWD1	-0.798216	2.39e-10	1.28e-09	1
PPP1R13B	-0.186651	0.00196664	0.00378103	1
ARL2	0.308708	0.00211638	0.00404572	1
TOP3A	-0.244877	2.2e-06	6.75e-06	2
CEACAM6	1.0457	0.000803276	0.0016486	1
UNC5A	-2.06853	2.44e-07	8.57e-07	1
ZNF181	-0.257396	1.97e-05	5.24e-05	1
RCL1	-0.20927	0.000516998	0.00109672	1
PIKFYVE	-0.216838	0.0308187	0.0469245	2
B3GAT1	-1.6784	5.18e-13	4.02e-12	1
FRY	0.474595	0.000124374	0.000291591	1
ATG2B	-0.189528	0.00484859	0.00864118	1
RHOT1	0.240433	8.09e-07	2.65e-06	1
RIOK1	-0.224586	4.31e-06	1.27e-05	1
RWDD2A	-0.418163	1.18e-05	3.25e-05	1
TMCO3	-0.252999	0.00610316	0.0106636	1
DSCC1	-0.649803	2.02e-08	8.25e-08	2
CLN5	0.548255	1.18e-14	1.15e-13	1
BIRC5	-2.37074	3.07e-32	7.84e-30	1
PRR16	-2.29342	2.74e-18	4.62e-17	1
CES2	0.347612	1.04e-08	4.44e-08	1
ARHGAP39	-0.68857	5.65e-14	5e-13	1
RTF1	0.20382	1.12e-05	3.09e-05	1
GLE1	-0.133581	0.0142353	0.0231616	1
CCDC57	-0.549645	3.94e-09	1.78e-08	1
SLC6A15	0.775475	0.0179229	0.0285736	1
UBR3	0.170606	0.0263573	0.0407648	3
OTUD4	0.222497	0.00403402	0.00730389	3
SERPING1	0.814329	6.9e-08	2.62e-07	1
KL	0.878962	0.00400177	0.00725191	2
SLC6A6	0.631352	2.69e-06	8.18e-06	1
RAB35	-0.145336	0.000688822	0.00143124	1
TDRD5	0.582353	0.0291024	0.0445543	1
GUCY2C	1.94678	4.04e-23	1.59e-21	2
EDNRA	1.45547	1.26e-17	1.91e-16	1
PPP2R5A	0.383962	5.18e-12	3.49e-11	1
EFHC1	-0.299482	0.000450318	0.000963593	1
PIK3AP1	-0.614137	1.07e-06	3.45e-06	1
SMAD9	0.550612	4.27e-07	1.45e-06	1
RGL1	0.879545	2.12e-12	1.51e-11	1
ZNF395	0.39506	7.18e-09	3.14e-08	1
TMEM87B	-0.270025	0.00083779	0.00171618	1
AFAP1L1	0.701373	1.12e-08	4.75e-08	1
ZNF549	-0.276206	3.71e-07	1.27e-06	1
SLC25A21	-0.365812	0.000404214	0.000872437	1
MFAP5	1.40061	1.19e-06	3.79e-06	1
FCGBP	1.49229	2.55e-09	1.19e-08	2
TTLL11	0.226356	0.000108894	0.000257731	2
NEBL	0.505836	6.8e-06	1.94e-05	1
HSPA8	-0.316063	0.000602955	0.00126465	4
UGT2B4	-3.15551	5.92e-12	3.96e-11	1
CARS	-0.126831	0.0175943	0.0280985	1
SRD5A2	2.66992	6.7e-24	3.02e-22	1
SMPD2	-0.423641	1.28e-05	3.51e-05	2
FN1	0.648481	0.000577516	0.00121572	2
DHFR	-0.397808	0.000687079	0.0014281	1
ZNF7	-0.381314	2.6e-09	1.21e-08	1
DGKD	-0.853996	2.27e-21	6.45e-20	2
PLXNB3	-1.10572	6.03e-18	9.66e-17	1
SORCS2	1.18143	2.15e-10	1.16e-09	1
ACVR2A	0.240761	0.00057785	0.00121629	1
ANKRD52	-0.440435	4.84e-09	2.16e-08	2
GNAO1	2.33028	1.72e-29	2.25e-27	1
OPA1	0.262774	2.53e-06	7.71e-06	1
RPS6KA6	-0.254666	0.00493953	0.00879136	1
SH3D19	0.241072	0.00218157	0.00415868	1
IFI16	0.823304	7.11e-09	3.11e-08	4
ZC3H6	0.218774	0.0016797	0.00326927	1
DISC1	-0.434039	0.00103751	0.00209158	1
LAMB3	2.4199	3.09e-16	3.76e-15	1
TRGC1	-2.5704	1.66e-26	1.24e-24	2
ALDH6A1	-0.357665	0.000263977	0.000587082	1
CMYA5	0.977964	3.65e-08	1.44e-07	2
SVEP1	-0.423186	0.0210628	0.0331267	1
GANAB	-0.22928	0.000131274	0.000306644	1
CHAMP1	-0.24678	0.00324046	0.00598589	1
ATP8B4	0.812531	0.000549763	0.00116022	2
PDGFD	1.3236	6.66e-19	1.22e-17	1
HARS	0.11836	0.0161424	0.0259937	1
CCL14	0.899177	2.72e-05	7.09e-05	1
SELP	0.365816	0.0179481	0.0286015	2
IFT43	0.224326	0.00128558	0.00255288	1
ZNF827	0.339869	0.00239241	0.00452409	3
FHIT	-0.64854	5.15e-08	1.99e-07	1
OSBPL3	0.649496	1.88e-05	5.02e-05	2
FBN3	0.917079	4.41e-05	0.000111069	1
HYPK	-0.737835	3.18e-12	2.2e-11	1
FDFT1	0.487913	4.69e-06	1.37e-05	1
PTGS2	2.08213	1.81e-13	1.49e-12	1
UBE2D3	0.0775112	0.0308284	0.0469354	1
SPIDR	-0.213773	0.00309491	0.00573714	1
MAP1A	1.65867	7.24e-21	1.89e-19	2
NAV2	1.50257	7.38e-18	1.16e-16	2
ATP6V1A	-0.180614	0.00985372	0.016559	2
ATXN7	-0.263065	0.00051119	0.00108528	1
ZNF781	0.917216	1.33e-13	1.12e-12	1
DNMT3A	-0.532369	5.19e-13	4.03e-12	2
RUNX1T1	0.871594	8.48e-09	3.67e-08	3
TRIM35	0.661056	2.77e-16	3.39e-15	1
SYT7	-1.02281	7.76e-14	6.76e-13	1
KCNN3	0.762617	3.58e-06	1.06e-05	1
KCNAB1	1.82228	9.08e-21	2.33e-19	1
MXRA5	0.721676	9.62e-06	2.69e-05	5
TRPC4	1.45381	1.96e-15	2.12e-14	2
EPHB3	-0.648613	1.63e-07	5.87e-07	1
TRANK1	0.422486	0.000933656	0.00189654	1
HIPK3	0.373237	6.69e-08	2.55e-07	2
TEX14	-0.309641	0.00220358	0.00419891	1
XPOT	-0.509501	3.67e-12	2.52e-11	1
GAL3ST1	0.881175	2.69e-06	8.17e-06	1
PIK3CD	0.521188	0.000209555	0.000474408	2
ACAN	-0.657628	0.0105999	0.0176837	3
DOCK4	-0.910937	6.07e-15	6.15e-14	1
ENOPH1	-0.368256	2.24e-08	9.08e-08	1
CHST2	1.65587	1.04e-20	2.64e-19	1
BCL11B	0.574986	0.00366099	0.00669625	1
EVX1	1.19385	3.38e-08	1.34e-07	1
HIST1H2AG	-0.682294	0.00159906	0.00312454	1
GTSE1	-2.29484	1.2e-34	5.15e-32	1
TSPAN2	1.37134	2.04e-16	2.55e-15	1
PCSK2	2.48836	1.05e-15	1.18e-14	1
HIST1H2BE	-1.16684	4.09e-08	1.61e-07	1
FAM91A1	-0.243767	0.000969508	0.00196439	1
PARS2	-0.190394	0.00344324	0.0063311	1
GNA13	0.315954	8.05e-06	2.28e-05	1
CHD1L	-0.478137	9.44e-14	8.12e-13	1
FUT8	0.293575	0.000459028	0.000980294	2
WWP1	-0.258853	0.00134379	0.00265844	1
SSBP2	0.811362	8.31e-23	3.08e-21	1
MMP12	-1.04052	0.00184969	0.00357222	1
CARD16	0.753648	2.06e-07	7.31e-07	1
INTS5	-0.346428	3.58e-09	1.63e-08	1
ZNF215	0.958428	3.39e-06	1.01e-05	1
BNC1	1.75264	3.74e-09	1.7e-08	2
AJAP1	1.19606	1.9e-08	7.76e-08	1
GALNT15	0.778117	1.44e-05	3.92e-05	1
MMP11	-1.25061	6.54e-12	4.35e-11	1
C3orf62	-0.329199	2.71e-07	9.45e-07	1
MIPEP	-0.816645	0.000654704	0.00136496	1
ZFX	0.263017	0.00585698	0.0102744	1
GPR155	0.465804	2.62e-05	6.85e-05	1
RAB24	-0.62867	4.66e-09	2.09e-08	1
ARHGAP20	1.93303	5.58e-22	1.79e-20	1
SHC2	-0.850721	1.72e-10	9.35e-10	1
NCOA5	-0.163239	4.94e-05	0.00012338	1
VPS35	0.136446	0.0125019	0.020583	2
COL4A2	0.463365	0.00165498	0.00322524	1
C1S	0.505008	0.00246687	0.00465344	3
KPNA4	0.274787	8.16e-08	3.06e-07	1
SIRT7	-0.315447	2.22e-06	6.79e-06	1
ERAP2	0.672084	0.0173326	0.0277382	1
HNRNPD	-0.186496	1.03e-05	2.88e-05	1
EFNA5	1.27604	2.58e-11	1.58e-10	1
ZNF44	0.146668	0.0119634	0.0197759	1
FCGRT	0.696853	1.61e-12	1.17e-11	1
IGF2BP2	1.13408	5.57e-09	2.46e-08	1
COL11A2	-0.592049	0.000516243	0.00109525	2
ZNF365	0.614156	0.000219038	0.000494418	1
CDC14B	0.652493	2.81e-08	1.12e-07	1
SYNE3	0.604284	1.42e-05	3.88e-05	1
PCDHGB7	0.755383	3.44e-05	8.81e-05	1
TLN2	-0.389706	0.00119213	0.00238272	1
SYCP2L	-0.693586	0.0133043	0.0217833	1
FTO	0.495986	9.64e-12	6.25e-11	1
GNAZ	1.9315	2.15e-31	4.35e-29	1
PSD	0.299289	0.00507186	0.0090086	2
LILRB3	-0.572586	2.75e-05	7.15e-05	1
OXSM	-0.496579	1.74e-14	1.65e-13	1
PLAT	0.686016	0.00174129	0.00337879	1
RASL12	1.97771	7.48e-25	4.16e-23	1
FRG1	0.208879	0.000169941	0.000390761	1
ADAMTS15	0.896496	5.54e-09	2.45e-08	1
ENOX1	-0.63778	2.02e-07	7.18e-07	1
PGAP1	0.985631	2.97e-18	4.96e-17	1
TMEM136	-0.544157	2.82e-08	1.13e-07	1
KIF17	0.73476	2.38e-08	9.6e-08	1
ST6GALNAC4	1.57739	2.22e-27	1.97e-25	1
IGFBP6	1.21876	2.09e-09	9.81e-09	1
HSPA14	-0.117815	0.0228792	0.0357516	1
ZNF142	-0.251178	4.19e-06	1.23e-05	1
ANKHD1	-0.228102	0.000684445	0.00142278	2
MUT	-0.214363	0.000607504	0.00127347	1
BAZ2B	0.251071	0.000799151	0.00164105	3
AKAP12	0.724462	1.05e-05	2.93e-05	1
SLC25A27	-1.18814	1.16e-12	8.56e-12	2
LRRC37B	-0.196888	0.00175753	0.00340709	1
WDR77	-0.272476	1.72e-05	4.62e-05	1
CEP85L	0.533124	4.7e-08	1.83e-07	2
ATF2	0.179005	0.00446735	0.00803008	2
PLSCR1	0.349989	0.0112412	0.0186775	1
HELB	-0.293093	0.00160433	0.00313384	3
SRP54	-0.222178	0.000129524	0.000302749	1
PIK3R2	-0.310834	0.00870585	0.0147849	1
SYTL2	-0.426922	0.00481619	0.00859425	1
EBF2	-1.81947	3.01e-11	1.83e-10	1
LACC1	0.637895	4.29e-10	2.22e-09	1
ZNF423	1.09808	1.41e-12	1.03e-11	1
XPNPEP3	-0.284063	1.02e-07	3.77e-07	1
SEMA6D	2.01197	3.53e-26	2.5e-24	2
IGHG1	-1.18281	0.00104989	0.00211446	1
FOXB2	-3.35849	5.06e-13	3.93e-12	1
GSDMB	-0.745147	5.46e-06	1.58e-05	2
LIG1	-0.227248	0.00118538	0.00237025	2
NID2	0.875935	8.58e-07	2.8e-06	1
ZNF616	-0.229481	0.000272712	0.00060505	2
KRT18	-0.605137	6.33e-09	2.79e-08	1
MACC1	1.33824	1.6e-09	7.63e-09	1
CDK5RAP3	-0.495363	8e-09	3.48e-08	1
SUSD4	1.01237	5.66e-11	3.3e-10	1
TRIM28	-0.262266	3.62e-06	1.08e-05	4
HTATSF1	0.194919	4.38e-06	1.29e-05	1
TTC22	1.13834	7.7e-08	2.9e-07	1
CELF2	1.27367	7.62e-16	8.75e-15	1
ZNF606	-0.366945	1.28e-08	5.4e-08	1
NUP107	-0.130946	0.00740406	0.012723	1
LRRC8B	-0.73902	5.06e-15	5.17e-14	1
KIF13A	0.159737	0.0272589	0.041976	3
RAC3	-1.17272	5.79e-17	7.88e-16	1
SLITRK2	2.04425	8.93e-12	5.82e-11	1
CCDC180	-1.20267	1.19e-13	1.01e-12	1
ESCO2	-0.981924	8.95e-08	3.34e-07	1
GIPC3	0.714222	2.82e-06	8.53e-06	1
FLRT3	1.84971	7.54e-12	4.97e-11	1
SEZ6L	0.751936	0.011852	0.0196129	2
ADAMTS3	-0.462112	0.00542335	0.00958303	1
TBC1D7	-0.321341	2.09e-05	5.53e-05	1
PCYOX1L	-0.35042	6.53e-07	2.16e-06	1
ABHD17B	-0.339359	4e-05	0.000101358	1
MKI67	-2.34579	1.89e-36	1.03e-33	3
VPS54	-0.301846	3.07e-05	7.92e-05	1
IL4R	0.453321	1e-06	3.23e-06	3
SPAG1	-0.260955	0.0277597	0.0426688	1
KIAA1024	-0.589536	4.68e-05	0.000117247	1
EMILIN2	-0.292492	0.0183806	0.0292528	1
DZIP1L	0.401769	0.00237117	0.00449222	2
ANKRD13A	0.26053	0.000107717	0.000255076	1
LOX	-0.727639	9.97e-05	0.000237102	1
SYPL1	0.314662	3.99e-08	1.57e-07	1
BUD13	0.153476	0.000190101	0.000433991	1
KIAA1211	0.619578	0.00382609	0.00696436	2
TGFBR3	1.58687	4.72e-26	3.24e-24	3
TATDN3	0.148843	0.00669913	0.0116124	1
MAP3K7	0.317097	3.43e-08	1.36e-07	1
MIPOL1	-0.43012	1.97e-08	8.06e-08	1
PALD1	0.282217	0.0327152	0.0496153	1
ATXN1	0.397537	0.0003264	0.000715378	1
F5	-2.19084	4.65e-12	3.16e-11	1
OLFML3	0.974295	3.54e-09	1.61e-08	1
ATP10D	0.617268	1.48e-07	5.36e-07	2
LCP1	-0.32531	0.0206899	0.0325927	1
USP12	0.219724	0.00020725	0.000469824	2
GHRHR	-1.88049	2.65e-10	1.41e-09	1
HINFP	-0.116528	0.026888	0.0414638	1
PRKACA	0.317609	2.48e-10	1.32e-09	1
PNPLA7	-0.808502	1.24e-11	7.94e-11	2
WDR90	-0.790403	2.09e-17	3.06e-16	1
INHA	-0.763873	1.85e-05	4.95e-05	1
SNX12	0.26512	5.93e-13	4.56e-12	1
UBALD2	-0.259809	0.00281404	0.00525507	1
NUP205	-0.147704	0.0280894	0.0431432	2
ACTA1	2.51028	1.73e-09	8.2e-09	2
DDX39B	-0.680452	3.87e-10	2.01e-09	1
SNTB1	0.473435	0.00322688	0.00596259	1
TGFB1I1	1.59311	1.95e-19	3.93e-18	2
TMEM192	-0.345187	1.38e-06	4.35e-06	1
NLE1	-0.64346	2.63e-17	3.78e-16	1
PFKFB4	-0.255382	0.0170847	0.0273652	1
CEACAM1	0.662125	0.000913722	0.00185933	1
PAGR1	-0.332452	1.94e-05	5.16e-05	1
BEND3	-1.09224	1.3e-15	1.44e-14	1
POLD3	0.263199	5.42e-08	2.09e-07	1
HSDL2	0.201043	0.00199403	0.0038293	1
ENGASE	-0.527044	2.69e-08	1.08e-07	1
SBNO1	0.21322	0.000604627	0.00126773	1
ANKMY2	0.620201	7.47e-24	3.32e-22	1
RBM25	-0.17399	0.00165817	0.00323112	1
PLEKHA5	0.276695	0.00023667	0.000530192	1
AMOT	1.28589	1.3e-15	1.45e-14	1
GSTM2	1.83509	1.49e-20	3.69e-19	2
MTCH2	-0.226451	0.000214156	0.000484347	1
BACH2	0.677676	5.5e-06	1.59e-05	1
AUTS2	0.338444	0.00563527	0.00992609	1
PPP2R3A	0.551344	1.24e-11	7.89e-11	1
HAP1	0.780421	3.33e-05	8.54e-05	1
PPARGC1B	1.19617	7.33e-18	1.16e-16	1
EPHB2	0.475293	0.0012277	0.00244664	1
ACTG1	-0.293581	1.58e-05	4.27e-05	3
COL27A1	0.968253	3.37e-07	1.16e-06	2
KDSR	0.447285	3.02e-13	2.41e-12	1
HAVCR2	-0.295392	0.0239829	0.0373527	1
NME1	-0.778999	1.22e-13	1.04e-12	1
MID2	0.206337	0.0205068	0.0323488	1
CCDC148	0.425005	7.36e-05	0.000178714	1
ANKS3	-0.492976	5.06e-08	1.96e-07	2
C2orf40	1.71121	6.79e-14	5.97e-13	1
HNRNPA1	-0.228828	8.47e-05	0.000203971	1
GIGYF1	-0.39032	2.32e-08	9.38e-08	1
HGS	-0.179794	0.00271115	0.00507993	1
TMC7	-0.350755	0.00079414	0.00163185	1
RANBP9	-0.147765	0.0155619	0.0251358	1
EVL	-0.453505	9.66e-10	4.74e-09	1
PYCARD	1.02538	7.45e-11	4.29e-10	1
AOC2	-0.71909	8.68e-08	3.25e-07	1
PDLIM5	-1.83246	9.72e-22	2.99e-20	1
C1orf43	-0.343048	1.83e-09	8.65e-09	1
C8orf82	-0.235033	0.0213319	0.0335156	1
CD1C	0.478073	0.019946	0.0315518	2
ZNF471	-0.256489	0.000282592	0.000625763	1
ZNF652	-0.491118	1.05e-07	3.89e-07	1
TRIM68	-0.669415	1.81e-07	6.46e-07	1
MCTP1	-0.667625	1.95e-06	6.01e-06	1
UCK2	-0.827916	3.69e-16	4.45e-15	1
IQGAP2	-0.331644	0.0120881	0.0199642	1
CDYL	0.149164	0.00670638	0.0116239	1
COBLL1	-0.27986	0.00527524	0.00934462	1
DONSON	-0.32803	1.46e-05	3.97e-05	1
SLC30A9	-0.173037	0.00332418	0.00612782	2
E2F8	-0.772908	0.000152203	0.000353338	1
DIO3	0.832889	3.6e-06	1.07e-05	1
TSTA3	-0.670639	1.06e-09	5.19e-09	1
KLK14	-1.26008	6.14e-05	0.00015111	1
MAST2	-0.564913	8.54e-12	5.58e-11	2
MATR3	-0.233685	0.0743337	0.104272	1
CA13	-0.407626	0.0200257	0.0316604	1
CILP	0.580441	0.00120869	0.00241189	2
TPSG1	1.14347	4.28e-09	1.93e-08	1
KCNAB3	-0.74604	2.67e-06	8.11e-06	1
C9orf85	-0.249815	1.03e-05	2.87e-05	1
GOLM1	-1.97568	9.58e-29	1.06e-26	1
SOX13	0.277893	7.19e-05	0.000175187	1
GIMAP8	0.344372	0.00856554	0.0145681	1
DUSP7	-0.167524	0.00941638	0.0158731	1
NR2F1	0.531722	0.000434085	0.000931312	1
GNAI2	0.750903	7.23e-26	4.77e-24	1
CAMK1	-0.290351	0.00663038	0.0115041	1
RFC3	-0.509655	2.81e-06	8.52e-06	1
AKAP7	0.83163	3.34e-10	1.75e-09	1
ASCC3	0.226731	0.0133904	0.0219127	1
LYSMD4	0.467037	8.64e-10	4.27e-09	1
ZCWPW1	0.35936	8.11e-06	2.29e-05	1
MTHFR	-0.601147	1.49e-10	8.21e-10	1
ACAT1	-0.206721	0.0322816	0.048994	1
PLK3	0.557504	8.98e-05	0.000215227	2
TMEM45A	0.668891	2.85e-05	7.4e-05	1
FBN2	0.832369	8.97e-05	0.00021498	1
ST3GAL1	0.750663	1.71e-07	6.13e-07	3
PHF3	0.195482	0.00295031	0.00548898	2
PLA2G2A	-1.76147	4.99e-06	1.46e-05	1
CYFIP1	-0.192363	0.000751982	0.00155231	1
UBQLN4	-0.114807	0.024755	0.0384577	1
TRPV6	-0.809384	1.37e-08	5.72e-08	1
RAB37	0.596312	1.62e-05	4.37e-05	2
BDNF	1.62227	2.49e-14	2.32e-13	1
TFCP2L1	1.13126	4.06e-06	1.2e-05	1
PAK6	0.807418	9.37e-05	0.000223934	2
SEMA3E	1.04433	1.77e-06	5.51e-06	2
WDR43	-0.303091	1.16e-07	4.25e-07	1
KIF5B	0.186158	0.00516587	0.00916057	1
CSDE1	0.235715	2.42e-07	8.49e-07	1
LRRC17	1.21383	8.29e-20	1.76e-18	1
TTYH3	-1.07473	1.25e-28	1.33e-26	1
COPZ2	1.25387	6.34e-17	8.58e-16	1
AMZ2P1	0.327818	1.25e-06	3.98e-06	1
ZNF665	0.146324	0.0263798	0.0407928	1
GPI	-0.328374	1.68e-06	5.23e-06	2
DHRSX	-0.157658	0.0185789	0.0295505	1
CAMK2D	0.435819	2.09e-06	6.42e-06	1
NPAT	0.260443	0.00120456	0.00240417	4
APOB	1.74075	1.49e-10	8.21e-10	4
CDH2	1.19618	9.59e-06	2.68e-05	1
FLNC	2.07803	5.62e-18	9.02e-17	1
ARID5B	-0.20251	0.0180366	0.0287351	1
SPTAN1	0.229453	3.48e-05	8.89e-05	1
PPARG	0.679334	0.000562351	0.00118543	1
IRF6	0.309683	0.000167486	0.00038561	1
HSPA4	0.134199	0.0137525	0.0224574	1
DHX40	0.123545	0.00917065	0.0154972	1
EVI5	0.195794	0.0019578	0.00376522	1
GNB1L	-0.29031	0.0017026	0.0033086	1
PPIG	0.224036	6.57e-05	0.000160921	1
GPALPP1	0.405989	2.09e-10	1.12e-09	1
MYL6	0.611663	1.81e-12	1.3e-11	3
EPB41L1	0.670116	3.76e-20	8.43e-19	1
C10orf76	0.273767	2.54e-10	1.35e-09	1
USP9X	0.215455	0.00122218	0.00243721	1
IFIT2	0.527492	0.00125898	0.0025049	2
NEK7	0.544765	3.89e-12	2.67e-11	1
TMEM246	2.02276	7.01e-20	1.51e-18	1
PAXIP1	-0.548267	1.46e-17	2.19e-16	1
FAM181B	1.39647	7.02e-15	7e-14	1
THTPA	-0.277254	0.000184459	0.000421687	2
IQUB	-0.341674	0.0107952	0.0179917	1
FES	0.720941	4.5e-09	2.02e-08	2
RALGAPA2	-1.26922	2.96e-22	9.96e-21	1
MIIP	-0.338769	0.000308989	0.000679642	2
TEAD2	0.51536	6.61e-05	0.000161784	1
RPL7	-0.34434	0.000121343	0.000285146	1
MYOF	1.53923	8.07e-21	2.09e-19	1
TMTC3	0.318864	4.6e-05	0.000115453	1
TLL2	-0.416863	0.0121139	0.0200032	1
LUC7L	-0.450354	8.16e-06	2.3e-05	1
SGSM1	0.644699	6.17e-06	1.77e-05	1
SOX12	-0.660616	1.81e-13	1.49e-12	1
GAS2L3	-0.52501	0.000118253	0.000278595	1
PDE8A	0.22806	5.56e-05	0.000137862	2
IGHV1-46	-1.06589	0.00439009	0.0078989	1
BLM	-0.952547	2.8e-15	2.94e-14	1
GMIP	-0.178694	0.016079	0.0259029	3
PPP1R3B	0.756929	1.03e-16	1.34e-15	1
ZFPM1	-0.199057	0.0244237	0.037975	1
FGFR2	2.18621	5.7e-22	1.83e-20	1
PCDHB2	-1.29359	1.17e-06	3.75e-06	2
CSF3	2.14214	1.64e-06	5.13e-06	1
GPATCH4	-0.372894	5.99e-08	2.3e-07	1
PDPR	0.281928	0.00210973	0.00403425	3
TNNI2	0.878321	0.00175093	0.00339609	1
CYC1	-0.216595	0.00879267	0.0149165	2
MORN3	0.480407	0.00155445	0.00304544	1
NYNRIN	2.11776	1.52e-29	2.04e-27	3
EPRS	-0.292424	1.64e-05	4.43e-05	1
DISP1	0.344397	0.000373069	0.000809481	2
SPATA6	1.21625	2.67e-16	3.28e-15	1
CYP7B1	0.545207	6.15e-05	0.000151357	1
C14orf159	1.29349	5.57e-20	1.22e-18	1
ALDH1B1	0.421273	5.27e-06	1.53e-05	1
TBX1	-1.51472	1.08e-08	4.61e-08	1
HIRIP3	0.320913	8.07e-08	3.03e-07	1
MPHOSPH8	0.375137	1.19e-16	1.55e-15	1
IQCG	-0.182192	0.0320473	0.0486585	1
TECPR2	0.358903	5.94e-11	3.47e-10	1
PCDHGA9	1.00982	1.71e-07	6.14e-07	4
JPH4	2.8739	1.35e-30	2.28e-28	1
CRYBG3	0.484993	0.00903774	0.0152978	1
HRASLS5	2.77505	5.85e-29	6.78e-27	1
CLCA2	3.78658	2.95e-21	8.27e-20	2
SPECC1	-0.439424	7.22e-05	0.000175822	1
TJP1	-0.304916	0.000444316	0.000951745	1
ERLEC1	0.349872	5.01e-06	1.46e-05	1
PRMT6	-0.477524	1.55e-07	5.61e-07	1
RBM12B	-0.354021	1.35e-05	3.69e-05	1
ADRB2	-0.978714	5.09e-13	3.95e-12	1
TRIM9	2.02303	3.13e-24	1.55e-22	2
PMFBP1	-0.45699	0.00535522	0.00947537	1
CSMD1	0.693133	0.0303843	0.0463205	4
GLI3	1.19723	1.29e-17	1.96e-16	2
VPS13A	-0.237414	0.00558565	0.00984716	2
BCOR	-0.513599	2.64e-07	9.23e-07	2
PFDN5	0.2409	0.00296513	0.00551322	1
ARAP3	0.619587	3.58e-07	1.23e-06	1
PICK1	-0.245818	0.00653826	0.0113613	1
FANCF	-0.491915	4.46e-12	3.04e-11	1
LONP2	-0.185874	0.0111466	0.0185305	1
EXOSC5	-0.467588	9.86e-07	3.19e-06	1
GAB2	0.273956	0.0125915	0.0207101	3
VPS13D	0.193057	0.00365503	0.00668601	6
SKIV2L	-0.308928	5.31e-10	2.71e-09	2
BMPER	1.59332	1.57e-09	7.48e-09	1
SLC7A8	0.515511	0.000156789	0.000363344	1
ADA	0.417543	0.000382316	0.000827886	1
TAF6L	-0.36429	1.83e-08	7.5e-08	1
ACADS	0.417608	0.000197163	0.000448814	1
TFG	-0.167567	0.00300859	0.00558635	1
ELOVL4	0.451253	0.0201305	0.0318016	1
ATF7IP	0.277684	0.000668707	0.00139211	3
CCDC8	1.82811	8.19e-23	3.04e-21	1
LIMK2	0.309373	6.89e-05	0.000168183	1
HHAT	0.885901	2.36e-11	1.46e-10	1
HSP90AA1	0.205712	0.0063904	0.0111307	2
ICK	-0.280872	0.000561744	0.00118428	1
SEL1L	-0.546836	8.66e-07	2.82e-06	1
THSD7B	1.02023	1.48e-05	4.03e-05	1
DUOX1	2.42136	2.06e-26	1.51e-24	1
ADGRG6	1.58209	6.22e-13	4.77e-12	2
PARP1	-0.174994	0.00426699	0.00769093	2
FERMT2	1.39226	2.98e-26	2.14e-24	1
JAG2	0.417426	0.000200949	0.000456777	1
CD34	0.404006	0.00116259	0.00232694	1
SLC37A4	0.532748	1.27e-09	6.13e-09	1
ZC3H13	0.554692	3.16e-11	1.91e-10	2
AP5Z1	-0.370165	6.45e-08	2.46e-07	1
GAPVD1	0.121841	0.013934	0.0227275	2
PCDHGA2	-0.475703	0.0320627	0.0486778	2
OGT	-0.991059	3.02e-20	6.97e-19	1
PHIP	0.224215	0.00480206	0.00857297	2
MYLIP	-0.241827	0.000776447	0.00159924	2
KCNT2	0.990365	1.86e-05	4.97e-05	1
NBEAL2	-0.553125	2.04e-08	8.32e-08	2
DHX32	-0.315271	1.84e-06	5.7e-06	1
MEN1	-0.5732	2.21e-22	7.69e-21	1
SS18	0.112908	0.0128121	0.0210391	1
NPHP4	-0.463899	5.44e-11	3.18e-10	2
TAF6	0.202063	0.00161514	0.00315261	1
IGLV1-47	-0.962359	0.0103695	0.0173308	1
DPP3	-0.465796	1.27e-10	7.05e-10	1
DAB2	-0.314595	0.00411751	0.00744261	1
ASPM	-1.96446	9.94e-23	3.64e-21	2
ZNF276	-0.441357	3.47e-06	1.04e-05	1
PLXNA2	0.820021	1.6e-13	1.33e-12	2
ZDHHC15	1.4111	1.2e-14	1.16e-13	1
SCARA5	2.53191	9e-16	1.02e-14	1
EBF4	0.6953	7.03e-08	2.67e-07	1
PRG4	-1.18367	4.39e-10	2.27e-09	1
ZNF597	-0.183275	0.00213405	0.00407652	1
TPM4	0.307753	8.62e-05	0.000207315	1
ACADSB	-0.332359	0.00181277	0.0035068	1
CABP4	-1.16227	3.4e-15	3.54e-14	1
HERPUD1	0.46664	4.03e-05	0.000102028	1
PRSS12	1.33346	3.44e-10	1.8e-09	1
PLCB1	0.729981	9.18e-13	6.88e-12	1
PPEF1	-0.96696	1.69e-07	6.07e-07	1
MTG2	-0.229641	5.09e-06	1.48e-05	2
LRRK1	0.332366	0.00267711	0.00502125	1
NXPE4	1.78769	3.19e-05	8.22e-05	1
RNF26	0.164607	0.000856095	0.00174998	1
NLRC5	-0.329106	0.0231948	0.0361987	1
PCF11	-0.279639	2.62e-05	6.85e-05	1
SORBS1	1.78685	5.29e-19	9.86e-18	1
FGF7	1.77716	1.33e-15	1.47e-14	1
GUCY1A2	0.585841	0.000548793	0.00115831	1
FNBP4	-0.248926	0.00039923	0.000862486	1
CLCN5	-0.419947	5.7e-06	1.65e-05	1
UBA6	-0.181966	0.00220576	0.00420219	1
FOXA1	-1.78545	7.68e-33	2.24e-30	12
CACNA1A	0.635356	4.89e-05	0.00012222	2
ZNF286A	0.269178	4.68e-05	0.000117247	1
GRIN1	-0.837946	8.51e-10	4.21e-09	1
LIMCH1	0.334511	0.000325759	0.000714059	2
SLC18A2	2.10376	1.98e-13	1.62e-12	1
SSH1	0.354054	8.37e-07	2.74e-06	1
GNPNAT1	-0.769919	1.14e-14	1.11e-13	1
HOOK2	-0.50488	2.72e-08	1.09e-07	2
INTS9	0.216337	0.000238305	0.000533398	1
CCNG1	-0.226965	0.00478838	0.00855041	1
MTMR7	0.655851	7.96e-11	4.57e-10	2
PTH2R	0.820509	0.00227723	0.00432717	3
IFI30	-0.834419	1.98e-06	6.1e-06	1
GLUL	0.623337	1.8e-12	1.29e-11	1
HK2	-0.862404	3.29e-09	1.5e-08	1
TMEM71	0.900923	1.52e-08	6.29e-08	2
ELOVL6	-0.407552	0.00248292	0.00468133	1
EPHX1	0.238235	0.00548499	0.00968453	1
DNAJC2	-0.355151	4.47e-10	2.31e-09	1
SLC27A4	-0.750763	1.18e-17	1.79e-16	1
AVPR1A	0.868314	4.15e-06	1.22e-05	2
USP34	0.31728	0.0209469	0.0329653	2
SLC16A3	0.608641	7.13e-06	2.03e-05	1
STK4	0.189575	0.00733796	0.0126165	1
APLP2	-0.245243	0.00169703	0.00329952	1
MICAL3	0.32465	0.00375394	0.00684317	1
CA2	0.631599	0.0121616	0.0200729	2
RANBP17	-0.865164	6.86e-25	3.85e-23	1
NOL6	-0.501074	2.97e-16	3.62e-15	1
RYR2	0.714344	0.00643456	0.0112001	5
TRRAP	-0.257242	0.00171985	0.00333931	3
BANP	-0.18414	0.000913576	0.00185924	1
ADCY6	-0.655916	2.43e-16	2.99e-15	1
C16orf46	-0.203813	0.0205108	0.0323496	1
ANPEP	1.41364	0.00171058	0.00332306	1
PROM1	2.40933	2.09e-14	1.97e-13	1
ZFYVE26	0.238042	0.000162085	0.000374111	1
FAT3	2.39106	6.31e-22	2.01e-20	9
DST	0.99478	2.99e-12	2.09e-11	4
RAB5C	0.240584	4.47e-06	1.31e-05	1
TTLL3	-0.321065	0.0165713	0.0266193	2
MSH2	-0.319193	5.54e-05	0.000137647	1
ZEB2	0.975944	7.5e-10	3.75e-09	1
WSCD2	1.698	1.6e-12	1.16e-11	2
TSC22D4	-0.271682	8.54e-05	0.000205692	1
STK35	-0.517623	1.1e-15	1.23e-14	1
USP48	-0.101173	0.0118468	0.0196061	1
SSTR1	-1.86119	1.49e-11	9.38e-11	1
SKIDA1	1.14445	7.48e-15	7.44e-14	1
LILRB5	-0.566745	0.00330508	0.0060967	3
TSPAN9	0.171048	0.0099504	0.0167036	1
ABCA4	0.685322	0.000425413	0.000914228	2
SRSF2	-0.262826	4.86e-08	1.89e-07	3
GNB5	0.747133	1.3e-19	2.66e-18	1
IRGQ	-0.315686	1.73e-07	6.2e-07	1
SMC5	0.220799	0.000618067	0.00129297	1
DTL	-0.894969	2.47e-08	9.97e-08	1
ZMYND11	0.373099	4.6e-11	2.71e-10	1
CDH23	1.53253	5.06e-21	1.35e-19	6
LRRFIP2	0.177926	0.0145807	0.023663	1
ZNF93	-0.346651	1.9e-05	5.07e-05	1
FAM196A	1.26353	3.1e-10	1.63e-09	3
RBBP5	0.101946	0.0311962	0.047452	1
CRK	0.27615	1.27e-07	4.64e-07	1
CDK19	-0.97752	4.7e-08	1.83e-07	1
BTBD7	0.254763	5.28e-05	0.000131428	1
GSTO1	0.325305	0.00026448	0.000588131	1
PCP4	2.02978	4.06e-16	4.85e-15	1
FAM217B	0.614723	3.6e-13	2.85e-12	1
SLC34A2	1.62049	0.000239814	0.000536518	1
SCN8A	-0.477174	0.0109271	0.0182015	1
TMEM145	-1.31701	8.87e-10	4.38e-09	1
RNF149	-0.298798	9.09e-10	4.48e-09	1
FDXR	0.318214	0.00163934	0.00319645	1
CHSY3	-0.513679	0.00367997	0.00672497	1
PRKAB1	0.226495	1.02e-05	2.83e-05	1
KIF20A	-2.11305	1.72e-26	1.28e-24	1
NNT	0.892381	2.92e-18	4.89e-17	2
DLGAP2	-0.547991	0.0164397	0.0264251	1
IRF8	0.69652	0.000146179	0.000339824	2
PFN1	0.156173	0.0169106	0.0271124	1
SS18L1	-0.610627	1.58e-23	6.72e-22	1
MAP7D3	0.820703	2.18e-11	1.35e-10	2
ADAMTS10	0.458397	0.00126487	0.00251474	2
ZNF282	-0.359694	4.22e-13	3.32e-12	1
PRDM15	-0.370462	7.15e-13	5.44e-12	2
NUMA1	-0.429263	8.46e-11	4.83e-10	1
SUPT6H	0.0981038	0.0158965	0.0256268	1
PI16	2.74857	8.9e-14	7.68e-13	1
NTN5	-0.439987	0.0147033	0.0238452	1
GPR87	2.61967	4.26e-13	3.34e-12	2
MKL1	0.17759	0.000276118	0.000612237	1
FREM1	0.569409	0.00142899	0.0028146	3
LAMA4	0.843914	9.9e-09	4.23e-08	1
NDUFA10	-0.161839	0.00184094	0.00355644	1
TDRD1	-3.91849	1.22e-20	3.05e-19	1
KCNK5	0.385676	0.0142633	0.023203	1
CYB561A3	-0.740659	1.36e-09	6.58e-09	1
SLC2A9	2.00073	4.82e-37	3.06e-34	1
DNER	0.972783	0.000137267	0.000320116	2
ETV6	0.401295	8.97e-08	3.35e-07	1
RANBP2	-0.30718	0.000219468	0.00049528	2
LIG3	-0.636696	1.39e-15	1.53e-14	1
DDX41	-0.195187	0.000225085	0.000506455	1
PGM3	-0.263247	0.0088876	0.0150653	1
VSIG10	-0.290492	1.47e-06	4.61e-06	1
HSPG2	0.506915	0.00221526	0.00421941	2
ABHD6	1.01224	4.09e-29	4.83e-27	1
SLC35F4	1.33917	1.73e-12	1.25e-11	1
PRKCA	1.22382	4.77e-16	5.64e-15	1
CCDC115	0.427478	3.03e-15	3.17e-14	1
TTC1	0.129482	0.0100897	0.0169138	1
HIPK1	0.15315	0.0302025	0.04607	3
ZNF300P1	1.36758	2.89e-11	1.76e-10	1
FMN2	1.39586	5.82e-11	3.39e-10	2
SCN5A	2.00387	2.94e-25	1.76e-23	2
FANCB	-0.34603	0.00482293	0.00860294	2
KAT6B	0.281344	0.00123026	0.00245122	2
VHL	-0.356965	2.75e-06	8.34e-06	2
PCNT	-0.308359	1.23e-06	3.92e-06	1
HDAC6	-0.106368	0.0302312	0.04611	3
SMCR8	-0.281602	0.000660003	0.00137492	2
TOP1	-0.297578	6.82e-05	0.000166649	1
ABCA3	-0.671976	5.61e-13	4.32e-12	1
PCDHB15	0.329021	0.0079472	0.0135905	1
CMTR2	0.211141	0.0118851	0.0196623	1
PFKP	0.521033	6.64e-08	2.53e-07	2
STOX1	0.444684	0.00336752	0.00620132	1
ZNF646	-0.221452	0.000106689	0.000252816	1
GALNT3	-0.91254	4.96e-11	2.92e-10	1
NTRK1	1.19363	4.93e-10	2.53e-09	1
EPN2	0.278245	3.49e-07	1.2e-06	1
XK	1.19529	6.71e-08	2.55e-07	1
MET	1.22631	7.68e-12	5.05e-11	2
THRAP3	-0.166108	0.000548116	0.00115701	1
LYAR	-0.322049	3.5e-06	1.04e-05	1
SLC12A8	-1.18537	1.06e-29	1.51e-27	1
KNDC1	1.24293	3.13e-09	1.43e-08	1
LRRN1	-1.09056	7.7e-05	0.000186529	1
ZFYVE1	0.182915	7.17e-05	0.000174544	1
TEAD1	0.949723	1.08e-16	1.41e-15	1
PTCD3	-0.140144	0.00217375	0.00414464	1
SNX33	0.295059	1.28e-07	4.69e-07	1
CTAGE5	0.146361	0.00921066	0.0155505	1
TMEM184A	-1.37128	1.08e-29	1.51e-27	1
MAPKAPK2	0.137753	0.0234338	0.0365531	1
NMNAT1	0.261301	2.6e-08	1.05e-07	1
DIP2A	-0.622794	2.44e-11	1.5e-10	3
ITGA3	1.04897	4.34e-18	7.09e-17	1
CYP2D6	-0.789634	2.77e-07	9.67e-07	1
ACSM3	-0.508649	0.00287392	0.00535713	1
TRPM6	0.625132	0.000859508	0.00175677	3
SLC8A1	1.62791	1.56e-17	2.32e-16	1
PDCD5	-0.492901	1.35e-11	8.57e-11	1
VGLL3	1.17384	0.00197009	0.00378688	1
GFPT2	0.771971	2.28e-07	8.04e-07	1
DNAH17	-0.286292	0.00770919	0.0132104	2
NOA1	-0.515744	2.23e-14	2.09e-13	1
SLFN12	1.10281	1.17e-10	6.57e-10	1
STAU2	-0.206022	0.00581623	0.0102106	2
PKDREJ	0.374307	0.00564748	0.00994475	2
PODN	0.795862	6.33e-06	1.81e-05	1
DSTN	0.761781	2.29e-23	9.36e-22	1
C9orf139	-0.444711	0.00110897	0.00222615	1
KLHL36	0.371391	1.03e-06	3.31e-06	1
BCHE	1.77831	1.49e-12	1.08e-11	1
KLHL30	1.37356	2.09e-09	9.81e-09	1
SNX19	0.128291	0.0160256	0.0258259	1
PXDN	-0.837052	9.23e-12	6.01e-11	1
CD6	-0.484564	0.00655724	0.0113879	1
CRHBP	1.44661	2.83e-11	1.73e-10	1
MYBPC1	-0.759499	0.0121581	0.0200707	1
SPTBN1	0.564462	6.17e-09	2.72e-08	1
IRS1	0.643961	2.07e-05	5.49e-05	2
CDC42EP3	1.23786	2.6e-23	1.05e-21	1
TSPAN7	1.11833	6.94e-14	6.09e-13	2
ZSCAN32	-0.167469	0.0100712	0.0168889	1
ATR	-0.404309	1.04e-07	3.85e-07	1
IGLV3-25	-0.905187	0.0266136	0.0411025	1
TACR1	0.421548	0.020803	0.0327516	1
PAQR8	1.74914	1.64e-27	1.49e-25	3
GBGT1	0.484133	6.97e-05	0.000169948	1
PCDH18	1.06695	5.98e-10	3.03e-09	7
DPYD	0.957009	1.43e-09	6.86e-09	2
MYO5C	-0.352945	5.63e-05	0.000139433	1
NUDT12	0.440646	0.00021588	0.000488068	2
NCAM1	2.34151	5.4e-20	1.19e-18	1
NFIL3	0.521175	6.71e-05	0.000164238	1
CAPN12	0.650321	7e-05	0.000170622	1
COX10	0.129067	0.00730093	0.0125587	1
GPATCH2	-0.1586	0.0085928	0.0146132	1
MRPL15	-0.49014	2.96e-09	1.36e-08	1
KCNQ5	1.86789	8.46e-20	1.8e-18	1
HP1BP3	0.165245	0.000358019	0.000779302	2
XPC	0.311698	3.28e-08	1.3e-07	1
NOP58	-0.403106	2.67e-12	1.87e-11	1
PCSK6	-1.92259	1.19e-32	3.32e-30	1
STAT5A	0.702992	3.06e-15	3.2e-14	1
IGLV2-23	-1.16638	0.00272217	0.00509851	1
SF3A3	0.176855	3.77e-07	1.29e-06	1
HCFC1	-0.218892	0.000178037	0.000407864	1
AHNAK	0.347212	0.000940872	0.00191036	7
KIF14	-2.08554	1.42e-23	6.07e-22	1
ACTR5	-0.235145	6.92e-06	1.97e-05	1
HEATR5B	-0.282252	0.000252758	0.000563356	2
DUSP18	0.616781	1.2e-12	8.87e-12	1
TRMT6	0.236701	0.000585295	0.00123006	1
ATP10A	-0.852632	8.67e-09	3.74e-08	1
SH3PXD2A	0.83349	6.83e-12	4.53e-11	1
MUC15	2.0471	1.03e-09	5.06e-09	2
SPINK5	0.808392	0.00255439	0.00480771	1
PAQR4	-0.520466	4.59e-05	0.000115268	2
JADE1	0.383725	0.00021964	0.000495595	1
TAGAP	0.56858	0.00182013	0.0035197	1
RIC3	0.652181	0.00030712	0.000675694	1
GGN	-0.32625	0.00984724	0.016551	1
CCT4	-0.19586	0.00116285	0.00232721	2
MTMR6	0.208609	0.000980245	0.00198352	1
TNRC18	-0.220577	0.00132101	0.00261618	1
GPR158	-0.82283	0.00990597	0.016636	3
ADCY3	0.617436	3.86e-08	1.52e-07	1
APBA2	-1.28462	2.03e-16	2.54e-15	1
TCF21	1.06618	8.01e-09	3.48e-08	1
JPH2	1.9185	1.81e-18	3.12e-17	2
TLK1	-0.356767	2.81e-06	8.5e-06	4
SIX2	1.2593	1.3e-08	5.47e-08	1
CSMD3	0.569151	0.0164404	0.0264251	8
XKR9	-0.571147	0.0127055	0.0208883	1
FAM193A	-0.154065	0.00140069	0.0027624	1
NAB2	0.608855	9.05e-10	4.46e-09	1
PCDHGA10	0.661524	0.00789594	0.0135091	1
TYRP1	-1.29914	4.65e-05	0.000116518	1
POLR1A	-0.472851	4.48e-12	3.05e-11	1
CD8A	0.40979	0.0231411	0.036121	1
ISCU	0.501962	9.03e-17	1.2e-15	1
ARHGAP25	0.496174	0.00017649	0.000404672	1
HAUS4	0.400026	2.61e-09	1.21e-08	1
KIAA0319L	-0.484192	6.37e-10	3.22e-09	2
NAA60	-0.452086	3.67e-08	1.45e-07	1
DOPEY2	-0.78338	3.29e-14	3.02e-13	2
SUMF1	-0.174324	0.00452716	0.00812332	1
TAOK2	-0.192663	4.83e-05	0.00012075	1
PPFIBP1	0.51682	1.84e-09	8.69e-09	2
KIAA1551	0.218391	0.0115563	0.0191631	2
MCM10	-1.46398	5.87e-14	5.19e-13	1
TCF19	0.246828	0.00266606	0.00500155	1
GABRE	0.990088	0.000122436	0.000287456	1
ELF4	1.09072	2.08e-13	1.7e-12	2
CD83	0.44746	7.48e-05	0.000181525	2
SIGLEC1	-1.05167	3.11e-08	1.24e-07	1
ADD1	0.353729	2.01e-17	2.95e-16	1
ACLY	-0.706467	1.15e-12	8.5e-12	1
WIF1	2.88914	3.41e-16	4.12e-15	3
STRN3	0.137492	0.022098	0.0346247	1
TMOD2	0.837148	2.65e-14	2.46e-13	1
DGKQ	-0.532	4.33e-10	2.24e-09	1
SCNN1B	1.16454	3.94e-05	0.000100111	1
SLC44A5	-1.42505	0.00012421	0.000291289	2
KMT2B	-0.313372	5.21e-08	2.01e-07	1
NR1D2	0.225992	0.0134037	0.0219305	2
ZNF536	1.89331	2.54e-14	2.37e-13	3
SETBP1	0.685002	3.24e-09	1.48e-08	2
NDC80	0.607061	1.47e-06	4.64e-06	1
GRIN2A	1.8928	6.4e-13	4.89e-12	4
KANK4	1.88133	9.77e-15	9.58e-14	1
MUS81	-0.120649	0.0225082	0.0352017	1
C22orf23	1.281	2.13e-25	1.3e-23	1
NELL2	1.27221	3.99e-08	1.57e-07	1
DPY19L2P2	0.793607	6.48e-07	2.15e-06	1
VCP	-0.27053	1.04e-06	3.36e-06	1
LAMA3	0.68006	0.000221159	0.000498657	2
LZTS3	0.707605	4.87e-10	2.5e-09	1
SLC11A1	-0.386132	0.000599736	0.00125862	1
TNFAIP3	0.581877	0.000161677	0.000373385	1
GBP4	0.493096	0.00237951	0.00450319	1
PKP2	0.439247	4.28e-07	1.46e-06	1
CA12	1.60364	3.4e-19	6.58e-18	1
SEC61A1	-0.36625	3.07e-07	1.06e-06	1
KRT86	1.14853	1.97e-08	8.03e-08	1
ZNF846	0.657814	3.8e-20	8.5e-19	1
SMURF2	-0.17456	0.00486109	0.00866178	1
EBP	0.478172	0.000197083	0.000448755	1
SLC22A3	1.41289	7.64e-08	2.88e-07	1
AVL9	-0.589013	2.92e-15	3.06e-14	1
WFS1	0.685553	1.12e-13	9.59e-13	2
PROC	-0.767639	0.0115051	0.019085	1
DEPDC1	-1.00019	1.25e-05	3.44e-05	4
ASPN	-2.03467	9.46e-23	3.48e-21	1
HFM1	0.668612	0.00472855	0.00845259	6
URB2	-0.39808	4.3e-07	1.46e-06	2
STK24	0.347485	1.09e-05	3.02e-05	1
SPEG	1.60332	1.71e-17	2.54e-16	4
ABCD3	0.497809	5.95e-14	5.26e-13	1
CCSER2	0.69874	2.07e-19	4.15e-18	1
METTL18	-0.218924	0.000482995	0.00102838	1
STARD8	1.24761	9e-16	1.02e-14	1
FOXP2	1.50561	1.59e-13	1.32e-12	1
POLR3A	-0.272628	7.03e-07	2.32e-06	1
ATP5A1	0.166352	0.00918459	0.0155179	2
KMT2D	-0.294233	0.00261293	0.00491238	7
BPIFB1	0.978461	0.00386468	0.00702696	1
RINT1	-0.323659	2.39e-07	8.41e-07	1
XPO6	-0.73822	2.4e-15	2.56e-14	1
BBS9	0.21293	3.24e-05	8.34e-05	2
HAUS1	0.295373	8.21e-06	2.32e-05	1
FAM83B	2.76547	1.16e-17	1.77e-16	6
PPP5C	-0.101132	0.0216999	0.0340357	1
IRAK2	0.317202	0.00710787	0.0122495	1
BLMH	0.153304	0.0174662	0.0279181	1
MYO9A	0.334033	2.78e-06	8.41e-06	3
SP110	-0.17634	0.0296649	0.0453287	1
SH3BP2	-0.174889	0.0123582	0.0203718	1
CEP290	-0.24637	0.00106339	0.00213954	1
PRPH2	1.68513	1.42e-18	2.5e-17	1
GOLGB1	-0.175841	0.00288639	0.00537875	2
API5	0.18082	0.000244811	0.000546834	1
MOV10L1	-1.88788	4.93e-15	5.05e-14	1
MYSM1	-0.561761	5.07e-09	2.25e-08	2
KLHL15	0.554652	3.52e-09	1.6e-08	1
METTL6	-0.164795	0.000172494	0.000396349	1
CDK13	-0.147193	0.00649175	0.0112922	2
PACS1	-0.275163	1.57e-05	4.24e-05	1
TIAM2	0.302306	1.43e-06	4.51e-06	2
FZD5	-0.298114	0.0163036	0.0262258	1
ADAMTS8	1.01121	3.43e-10	1.8e-09	1
HOXC4	-3.387	2.75e-38	2.11e-35	1
SLITRK3	2.07295	2.18e-09	1.02e-08	1
CHRDL2	1.06032	3.99e-05	0.00010113	1
CNTN1	1.40531	3.81e-11	2.27e-10	1
FAHD2A	-0.247212	3.84e-05	9.76e-05	1
BBS4	-0.567718	1.39e-05	3.81e-05	1
ITPKB	0.220877	0.00134705	0.00266425	1
HS6ST1	0.354063	1.1e-05	3.05e-05	1
MEOX2	0.815491	0.000741623	0.00153248	1
TTC39B	0.321079	0.000277173	0.000614502	1
FAM71E1	-0.682599	1.12e-09	5.47e-09	1
PSMD6	-0.143442	0.00191949	0.00369616	1
TCERG1	-0.276322	1.05e-05	2.93e-05	1
KRT16	2.54621	2.47e-14	2.31e-13	1
ROBO4	0.437305	0.000747137	0.00154266	2
CPEB4	0.371822	0.000206975	0.000469259	1
RAB4A	0.166927	0.00861526	0.0146486	1
TBX3	0.361353	0.000986672	0.00199587	2
ELMO1	0.318296	0.00960399	0.0161642	1
UNC13A	-0.765784	0.000382136	0.000827595	1
CCDC136	1.09365	2.09e-14	1.96e-13	1
PRX	0.469572	1.63e-07	5.87e-07	1
TRIOBP	0.316729	3.09e-07	1.07e-06	3
UVSSA	-0.796107	3.3e-15	3.44e-14	1
MCM2	-0.365956	1.46e-05	3.97e-05	1
HIPK4	0.694399	3.24e-08	1.29e-07	1
MCM4	-0.233637	0.0197981	0.0313328	1
PKHD1L1	1.23203	2.64e-08	1.06e-07	3
MCC	1.63054	1.39e-24	7.26e-23	1
P2RX2	1.76453	4.34e-12	2.96e-11	1
ARHGAP5	0.266213	0.000610616	0.00127927	1
CETP	-0.520347	0.00160861	0.00314153	1
DNAH10	-0.588286	4.87e-05	0.000121786	1
CACNB2	0.508079	1.42e-06	4.48e-06	1
TBC1D32	-0.273337	0.00450064	0.0080836	1
MTA1	-0.243898	0.000221562	0.000499504	1
CLCN3	-0.319402	0.000205507	0.000466159	2
ESYT2	0.14097	0.0138187	0.0225574	2
DDX17	-0.280636	3.69e-06	1.1e-05	1
PLEKHA2	1.39457	1.27e-27	1.17e-25	1
FILIP1L	1.06705	3.08e-08	1.23e-07	2
L3HYPDH	-0.533615	5.39e-07	1.81e-06	2
SCN7A	1.4388	2.07e-10	1.11e-09	3
ESRP1	-0.838797	3.48e-20	7.89e-19	1
PEG3	1.12235	1.98e-17	2.9e-16	2
NADK	-0.369645	4.25e-14	3.84e-13	1
SGSH	-0.413427	1.62e-09	7.71e-09	1
TMEM243	0.672831	4.79e-12	3.25e-11	1
NPIPB4	-0.674389	0.00059963	0.00125854	1
CKAP2L	-1.52452	8.42e-15	8.32e-14	2
RSPRY1	0.15874	0.00378962	0.00690274	1
LEKR1	-0.313055	0.00334715	0.0061669	1
JUP	-0.233147	0.000459113	0.000980363	2
SHANK2	-0.511593	4.65e-07	1.57e-06	2
ILDR2	1.00861	6.17e-10	3.13e-09	2
NBEAP1	-2.5334	6.61e-08	2.52e-07	1
SCAF1	-0.249172	4.16e-05	0.000105075	1
KCTD8	1.4855	2.22e-07	7.83e-07	1
LSR	-0.505321	2.66e-10	1.41e-09	1
MIS12	0.202511	0.000530992	0.00112331	1
UNC5D	0.983564	0.0218216	0.034215	1
DIO1	-1.51985	1.25e-06	3.97e-06	1
EIF2B1	-0.128742	0.00127315	0.00253065	1
FAT1	-0.420751	0.00154016	0.00301904	2
CELSR2	0.920981	1.25e-16	1.61e-15	2
SV2A	1.11162	2.62e-13	2.11e-12	2
FRMPD1	-0.555053	0.0103602	0.0173167	1
ZNF668	-0.372298	5.18e-08	2e-07	1
GTF2E2	0.185519	0.00945011	0.0159256	3
KLHL5	0.891135	4.68e-14	4.19e-13	1
PPM1G	-0.328694	6.83e-09	2.99e-08	1
FZD3	0.575436	1.61e-07	5.8e-07	1
DLG5	0.33681	0.00579898	0.0101823	1
ATG12	0.297829	6.5e-10	3.27e-09	1
BMI1	0.150396	0.0116644	0.0193304	1
MASP1	1.78534	5.93e-13	4.56e-12	1
ASTN1	2.12503	8.19e-13	6.18e-12	2
BOLA3	-0.230584	0.00262798	0.00493564	1
MIA3	-0.642977	3.58e-09	1.63e-08	3
SEMA3F	0.511823	2.92e-05	7.57e-05	1
TIGD3	-0.733351	2.04e-08	8.32e-08	3
VIPAS39	0.331487	2.94e-15	3.08e-14	1
ZNF404	-0.283639	0.00072661	0.00150381	1
NSMAF	-0.331317	2.15e-06	6.61e-06	1
HMGCS1	0.496137	1.14e-05	3.17e-05	1
TYW1	-0.174088	0.000280038	0.00062038	2
PSMA6	-0.132794	0.0250612	0.0388973	1
DCN	1.16922	7.38e-10	3.69e-09	1
FBXO6	-0.214424	0.00396112	0.00718743	1
MKS1	-0.166158	0.00033784	0.000738694	2
NXPE3	0.822792	5.6e-14	4.96e-13	1
COMMD6	0.363359	0.000103324	0.000245211	1
DOCK7	-0.226157	0.00782966	0.0134007	3
SERPINB3	1.03251	0.0126716	0.0208362	1
ARHGEF19	1.23898	3.71e-15	3.85e-14	2
ABCC8	1.02873	1.27e-05	3.48e-05	1
MAP1S	-0.199817	0.00199865	0.00383617	1
TTC4	0.105741	0.0181414	0.028892	1
BNC2	1.35208	7.36e-15	7.33e-14	1
MAGED1	-0.454696	4.25e-07	1.45e-06	1
WDR3	-0.441666	6.08e-09	2.68e-08	1
KLHDC9	-0.315671	0.000463224	0.000988797	1
SAMD4B	-0.114715	0.00689038	0.011917	1
SCAP	-0.26639	2.9e-06	8.76e-06	1
ADAMTSL1	0.631877	0.0275023	0.0423297	1
CALCOCO1	0.265557	1.85e-06	5.73e-06	1
ZBTB32	-0.702336	3.15e-06	9.47e-06	2
BRAF	-0.361224	2.49e-07	8.72e-07	3
PAX5	-1.08533	0.00013925	0.000324616	1
IGKV1-5	-0.912898	0.0143974	0.0234006	1
LTBP3	0.399971	5.96e-05	0.000147019	2
UTP15	-0.130638	0.0229952	0.0359176	1
MYBBP1A	-0.483583	2.53e-13	2.04e-12	1
PASK	-0.473501	4.36e-05	0.000109863	2
NDEL1	0.243129	3.85e-05	9.78e-05	1
SI	-1.17692	0.00316757	0.00586122	2
MBD1	0.202885	5.27e-06	1.53e-05	2
WDR73	-0.139593	0.0131708	0.021582	1
SLC5A8	2.45979	1.37e-09	6.59e-09	1
COL12A1	-0.525817	0.017522	0.0279927	2
TRIM62	-0.426787	1.09e-09	5.33e-09	2
MAP3K9	-0.591495	8e-10	3.98e-09	1
TFAP2E	-0.378536	0.00392435	0.00712562	2
RHBDD1	0.300451	9.05e-11	5.13e-10	2
TTC26	-0.195053	0.00581832	0.0102124	1
HYAL1	0.55537	1.38e-07	5.02e-07	1
HDLBP	-0.33911	1.73e-08	7.11e-08	1
HECW1	1.68573	4.39e-10	2.27e-09	2
FAM174B	-0.479217	3.28e-06	9.82e-06	1
ARHGEF10L	0.548503	2.15e-14	2.02e-13	1
USP30	0.112019	0.0224065	0.0350664	2
KANK1	0.993264	3.68e-22	1.23e-20	2
KIF26B	1.09523	1.42e-09	6.84e-09	2
PTN	1.41241	1.14e-08	4.83e-08	1
MACF1	0.21339	0.00608584	0.0106369	6
MDFIC	1.10127	3.47e-18	5.77e-17	1
NUFIP2	-0.168212	0.00301041	0.00558894	1
MBNL2	1.24552	3.95e-22	1.31e-20	1
LZTR1	-0.281966	5.36e-07	1.8e-06	1
TRIO	-0.281422	0.0009018	0.00183689	3
ZNF473	-0.531625	0.000437353	0.000937679	1
GPR107	-0.214581	0.000337995	0.000738945	1
RECQL	0.369306	0.00152094	0.0029855	1
FOXQ1	1.97065	2.25e-16	2.79e-15	1
POLG2	-0.465328	2.9e-10	1.53e-09	2
PTPRE	0.29034	0.0198125	0.031353	1
MFSD6	0.29368	0.00289182	0.00538786	1
PKD1	0.321317	0.000373174	0.00080961	3
DIRC2	-0.233799	0.00273309	0.00511687	3
PTPRZ1	1.72271	2.85e-08	1.14e-07	1
ALKBH1	0.162177	0.000401184	0.000866404	2
MSH5-SAPCD1	-0.897536	1.6e-08	6.63e-08	1
COG6	0.3745	3.34e-06	9.98e-06	1
B3GNT9	1.38096	1.8e-22	6.32e-21	1
SCYL1	-0.231993	5.67e-05	0.000140463	1
UAP1L1	-0.451638	4.98e-06	1.45e-05	1
TBX5	1.35908	5.11e-06	1.49e-05	1
SLC16A7	1.09248	8.24e-11	4.71e-10	1
ITGB4	1.37939	4.51e-14	4.05e-13	1
DCBLD2	0.84153	1.52e-18	2.66e-17	1
FMO4	0.725932	4.82e-11	2.84e-10	1
TBC1D5	0.261987	1.09e-05	3.04e-05	1
MYO6	-1.08839	4.3e-11	2.55e-10	1
FAS	0.756623	3.13e-09	1.43e-08	2
KIFAP3	0.157643	0.00714148	0.0122994	1
CNKSR3	-0.41374	0.000110698	0.000261766	1
CSTF3	-0.250138	3.12e-07	1.08e-06	1
PRTFDC1	1.32947	1.4e-17	2.11e-16	1
SOD3	0.557892	0.000410642	0.000885169	1
VWA8	0.358433	2.23e-05	5.87e-05	2
SLC26A3	2.45341	8.98e-09	3.86e-08	1
FAM102B	0.518783	1.53e-07	5.53e-07	1
CCT2	-0.465894	1.57e-14	1.5e-13	1
ARF4	-0.163375	0.0129153	0.0211973	1
MBTPS1	0.214071	0.000124387	0.000291591	1
NCF2	-0.358482	0.0135256	0.0221201	1
SUPT5H	-0.159724	0.000232983	0.000522631	2
LARS	-0.278248	1.39e-08	5.79e-08	1
ALG14	-0.214684	0.00292918	0.00545207	1
KNSTRN	-0.500743	7.18e-08	2.72e-07	1
PI4K2A	0.347263	8.67e-10	4.29e-09	1
WDR75	-0.337435	8.77e-12	5.72e-11	1
ZFAND4	-0.218509	0.00766648	0.013147	1
ITGA1	0.997711	2.99e-11	1.82e-10	1
TSGA10	-0.732866	1.56e-12	1.13e-11	1
TCF12	0.280883	0.000238333	0.000533398	1
ZNF721	-0.49906	1.03e-16	1.34e-15	1
MYOT	1.69143	1.66e-08	6.85e-08	1
SGIP1	-0.550499	0.00179649	0.00347712	1
VPS36	0.495686	3.93e-11	2.34e-10	1
ALOX15	-2.40788	2.2e-08	8.93e-08	2
PCDHB11	-1.18059	3.24e-06	9.71e-06	1
RNF144A	-0.731871	4.48e-12	3.05e-11	1
NUPR1	-0.305889	0.0212896	0.0334548	1
ITGA8	1.07327	3.3e-06	9.89e-06	1
RBMS2	0.622131	1.4e-12	1.02e-11	1
ANTXR2	0.813538	1.29e-09	6.24e-09	1
IL1RL1	1.44639	5.3e-09	2.35e-08	1
MID1	0.767712	1.21e-07	4.44e-07	1
MYO16	0.9343	1.56e-06	4.87e-06	1
TSHZ2	0.911604	2.25e-10	1.2e-09	1
ZNF366	0.558357	0.00721332	0.012415	2
RIPK2	-0.910953	2.55e-20	5.94e-19	1
TRIM37	-0.270399	2.29e-05	6.04e-05	1
SNX31	1.06955	4.16e-05	0.000104963	2
GRHL2	-0.638294	4.21e-14	3.8e-13	1
LRRC43	0.881964	4.33e-08	1.69e-07	1
ABCC4	-1.96581	1.42e-24	7.39e-23	1
FAM171A1	-0.306554	0.00137728	0.00272001	2
EARS2	-0.391314	7.85e-11	4.51e-10	1
PGBD1	0.130329	0.0272509	0.0419672	2
SLC43A3	0.424664	0.000289188	0.000639218	1
NRBP1	0.205291	7e-07	2.31e-06	1
CCNL2	-0.897622	7.93e-13	6e-12	1
KIAA1217	0.395437	5.15e-07	1.73e-06	1
EIF2S3	-0.439958	1.57e-14	1.49e-13	1
ABTB2	0.352551	0.00886052	0.0150241	1
AP4B1	-0.140428	0.00538373	0.00952124	1
FZD7	1.1221	1.02e-15	1.15e-14	1
VANGL2	1.09218	9.8e-08	3.64e-07	1
TBC1D2B	0.363508	1.85e-06	5.73e-06	1
DGKZ	0.129266	0.0291253	0.0445819	1
ANK2	1.54179	4e-16	4.78e-15	1
LARP1	-0.452168	1.41e-14	1.35e-13	2
KLK2	-1.61277	1.35e-15	1.49e-14	1
KIF21A	-0.497472	1.83e-05	4.89e-05	1
SLIT3	1.14094	8e-11	4.59e-10	2
ADAMTS14	-0.470726	0.0176739	0.0282158	1
ARHGEF39	-0.521656	4.68e-06	1.37e-05	3
PDK2	0.772137	1.23e-19	2.53e-18	1
PHC2	0.113583	0.0170632	0.027338	1
SLC38A2	0.196909	0.00408298	0.00738455	1
MPP2	1.91827	2.32e-25	1.41e-23	2
ITPR1	1.28792	1.84e-12	1.32e-11	1
DUSP1	0.785387	6.06e-06	1.74e-05	1
GBP2	0.965112	2.89e-10	1.53e-09	1
MRC2	0.709261	1.88e-07	6.7e-07	1
LRPPRC	-0.193822	0.00285816	0.00532936	1
ACVR1C	0.635012	5.27e-06	1.53e-05	1
SETD5	-0.151586	0.0189498	0.0300989	4
POMGNT1	-0.190029	0.0036647	0.0067017	1
COL4A3BP	0.246954	0.00192227	0.00370113	1
EDF1	-0.29399	0.00286026	0.00533275	1
MAP7D2	0.712579	0.000418925	0.000901232	1
USP45	-0.225569	0.00471437	0.00843051	2
TNS1	1.66857	2.1e-20	5e-19	4
CCNJL	1.45775	5.33e-16	6.28e-15	1
USP53	0.371983	5.14e-05	0.000128183	1
CDC20	-1.89803	1.86e-25	1.15e-23	3
SMAD4	0.23937	7.68e-05	0.000185965	4
SLC4A7	-0.271195	0.00434667	0.00782613	1
CCDC40	-0.963524	1.81e-22	6.37e-21	1
GNL1	0.294781	9.16e-07	2.97e-06	1
GART	-0.419791	5.49e-13	4.24e-12	1
PER3	0.659685	1.64e-07	5.88e-07	2
SCARB1	-0.743359	6.82e-20	1.47e-18	1
VARS2	-0.50654	9.87e-13	7.37e-12	2
ITPR2	-0.40361	0.00188331	0.00363257	3
UTP23	-0.166814	0.0154415	0.0249545	1
MLLT3	-0.174997	0.0264034	0.0408258	1
PLK4	-0.307042	0.00403245	0.00730175	1
MED16	-0.178076	0.0121615	0.0200729	1
GOSR1	-0.116261	0.0111959	0.018609	1
PLOD3	-0.314158	7.56e-06	2.14e-05	1
WASF3	-0.521304	7.58e-07	2.49e-06	1
SRP19	-0.174336	0.0305064	0.0464873	1
LRP10	0.203372	0.00394492	0.00716015	1
BUB1	-1.68223	1.63e-20	4e-19	1
MYO7B	0.611585	9.47e-05	0.00022614	1
TRIP13	-1.48367	3e-26	2.14e-24	1
CPED1	1.49044	7.79e-15	7.73e-14	1
PTBP1	-0.344386	8.79e-15	8.66e-14	1
BRD1	-0.158732	0.000601511	0.00126206	2
IVD	-0.219329	0.0117571	0.0194662	1
SF1	-0.121547	0.00241712	0.00456567	1
NUP210	-1.35396	2.52e-35	1.29e-32	1
RNF213	-0.284532	0.00164671	0.00320981	1
XPR1	0.217595	0.00139423	0.00275114	2
ACE	1.08375	2.95e-14	2.72e-13	2
L1CAM	1.70736	2.01e-10	1.08e-09	1
CACNA1D	-2.23674	1.45e-21	4.3e-20	2
UHRF1BP1	-0.471559	1.03e-09	5.03e-09	2
CD163	-0.53012	0.0039412	0.0071541	2
PRDM8	2.25487	1.03e-19	2.15e-18	1
KRT14	2.11452	1.94e-10	1.05e-09	1
FBXO21	0.188713	0.00128906	0.00255867	1
R3HCC1L	0.197332	0.00113636	0.00227767	1
TYW3	0.215133	2.25e-05	5.92e-05	1
NT5C3A	-0.280477	5.59e-05	0.000138688	1
EZH1	0.483616	2.11e-16	2.63e-15	2
TTC31	-0.226336	3.6e-07	1.23e-06	1
WDR46	-0.185001	0.0012955	0.00256952	1
LRRTM4	0.76575	0.00639162	0.0111317	1
DDIT4	1.06136	8.64e-12	5.64e-11	2
CACNB4	1.08589	3.7e-10	1.93e-09	2
GMPPB	-0.223454	0.0135904	0.0222123	2
BMPR2	0.192388	0.0168553	0.0270283	1
GCC1	-0.177709	0.000667949	0.00139084	2
HIVEP2	0.217514	0.00969149	0.0163011	1
KCNH8	-1.37342	1.11e-05	3.08e-05	2
CTSG	0.874464	0.00406215	0.00735135	1
ANAPC2	-0.349522	1.26e-08	5.31e-08	1
SNRPA1	-0.510803	2.09e-16	2.61e-15	1
CERS5	0.16832	0.000162981	0.000375943	1
KIF6	0.907931	4.24e-07	1.44e-06	1
HIST1H2BG	-1.47097	8.56e-11	4.88e-10	3
REG4	-0.854902	0.00946744	0.0159534	1
SLX4	-0.281665	7.17e-06	2.04e-05	1
IQCA1	1.70397	1.07e-17	1.65e-16	1
EIF5	0.247619	8.65e-06	2.44e-05	1
NLN	-0.611847	7.08e-11	4.09e-10	1
BCORL1	0.177321	0.0298847	0.0456245	3
HNRNPF	-0.517675	4.92e-17	6.77e-16	1
COL28A1	-0.754586	0.000650091	0.00135596	1
FHOD1	-0.412465	1.77e-07	6.34e-07	1
DHPS	-0.356738	1.05e-07	3.87e-07	1
NDST2	-0.346314	9e-10	4.44e-09	2
PIK3CA	0.178764	0.030606	0.0466314	6
KDM4C	-0.105806	0.0265986	0.0410897	2
ERBB3	-0.749372	1.35e-13	1.13e-12	1
ZFC3H1	-0.19971	0.00439689	0.00791038	3
SDK1	-1.58043	2.12e-12	1.51e-11	2
SDC1	0.936939	1.28e-07	4.69e-07	1
MYCBP2	0.449555	1.47e-05	3.99e-05	4
CYP27A1	2.1331	2.04e-20	4.9e-19	1
ZNF777	-0.159908	0.000785498	0.00161643	1
ZNF841	-0.546825	5.43e-10	2.77e-09	1
PEX3	0.370936	1.17e-11	7.48e-11	1
PABPC4	-0.421947	1.85e-09	8.76e-09	1
CD63	0.176816	0.0135448	0.0221436	2
TOP2A	-1.97187	2.44e-22	8.34e-21	1
C16orf89	1.73117	2.29e-14	2.14e-13	2
SF3B1	-0.121244	0.0150781	0.0243951	1
ALDH1A1	0.726948	0.00213978	0.00408705	1
RNASEL	0.686902	3.01e-18	5.01e-17	1
TNS4	2.47347	2.16e-11	1.34e-10	1
IGHA1	-0.805306	0.026605	0.0410961	1
SPARCL1	1.26249	2.96e-15	3.1e-14	1
IL6ST	0.854447	7.96e-19	1.45e-17	3
ZNF319	0.238707	0.000164678	0.000379525	1
SPATA20	-0.307285	0.000306147	0.000673793	1
TNFRSF10B	0.256334	0.00229493	0.00435809	1
FAM98C	-0.372595	3.66e-08	1.44e-07	2
ACAD10	-0.340674	2.54e-07	8.92e-07	2
WNK3	-0.364921	0.0106533	0.0177632	1
KIF18A	-0.426577	0.00141898	0.00279667	1
KMT2A	0.189285	0.0121571	0.0200707	3
ALOX12B	-0.484622	0.0275159	0.0423399	1
ERF	0.236226	0.00548658	0.00968641	1
BPHL	-0.593583	1.2e-11	7.66e-11	1
EIF2AK4	-0.289757	5.59e-05	0.000138572	1
BAZ1A	-0.492168	3.11e-11	1.89e-10	1
LRRN3	2.32296	1.91e-21	5.53e-20	1
ARID3B	-0.291837	4.43e-06	1.3e-05	1
DPP8	0.359949	1.42e-10	7.86e-10	1
ZDHHC14	0.375133	0.00125961	0.00250562	1
ZFP64	-0.183156	0.000160354	0.000370625	1
DMAP1	-0.226696	0.000832973	0.00170689	1
ANKRD12	0.182078	0.0125763	0.0206907	1
ZNF587	-0.574704	2.4e-15	2.56e-14	1
UBA5	-0.178393	0.00128789	0.00255691	1
MLH3	0.149447	0.000842069	0.00172399	1
COPB1	-0.224392	0.000756798	0.00156156	1
C19orf24	-0.419876	0.000227088	0.000510588	1
C15orf56	0.946532	2.35e-06	7.19e-06	1
PCDHA1	-1.79382	6.52e-06	1.86e-05	4
TCF7L2	0.309278	1.06e-05	2.96e-05	2
WSB2	-0.604545	3.1e-13	2.47e-12	2
CHD5	1.26352	3.12e-11	1.89e-10	1
PLEKHS1	-0.845146	5.75e-05	0.000142123	2
CACYBP	0.140846	0.0246248	0.0382651	1
JAK1	0.516055	8.42e-12	5.5e-11	2
MT-CO2	-0.385197	0.00300871	0.00558635	1
SCUBE2	0.742523	0.00916572	0.0154903	1
GALNT11	-0.19951	0.000800281	0.00164282	1
TOR1AIP2	0.208318	0.000209481	0.000474298	1
PIGO	-0.359768	1.11e-05	3.09e-05	1
HIPK2	-0.749754	9.2e-11	5.21e-10	1
TIMM13	-0.602501	2.41e-10	1.29e-09	1
AKT1	-0.184938	0.00037226	0.00080782	2
CASC1	0.346207	0.00602273	0.0105411	2
SHROOM2	-0.268818	0.00145351	0.00285985	1
COL6A3	0.679422	6.43e-05	0.000157725	2
TBC1D2	0.837822	1.34e-15	1.48e-14	4
PON2	-0.205177	0.00092202	0.00187435	1
MALAT1	-0.641029	2.74e-05	7.14e-05	3
PLB1	0.351701	9.18e-05	0.000219837	1
PIP5KL1	1.04511	2.61e-11	1.6e-10	1
ENC1	-0.621024	2.02e-06	6.24e-06	1
SLFN5	0.640726	1.31e-07	4.78e-07	1
MARS	-0.250086	2.19e-06	6.71e-06	1
ARSE	0.868162	1.36e-06	4.31e-06	2
COL6A1	0.803387	4.38e-08	1.71e-07	2
EXOC3L1	-0.255467	0.00423223	0.00763426	1
MIOS	-0.540212	3.92e-13	3.09e-12	1
SAMD9	0.433947	0.00905541	0.0153249	2
MMRN1	0.866096	0.000184001	0.000420795	1
LCN2	1.55077	6.48e-05	0.000158711	2
SV2C	-1.02278	2.14e-09	1e-08	1
CACNA2D4	0.534263	5.19e-06	1.51e-05	1
PPP2R5E	0.135547	0.00520647	0.00923079	1
SFT2D1	-0.261752	7.88e-05	0.000190641	1
GTF3C1	-0.473917	3.83e-10	2e-09	1
SEPHS2	-0.288711	6.09e-06	1.75e-05	1
LARS2	-0.286523	1.89e-05	5.04e-05	1
SLC25A38	-0.222041	5.83e-05	0.000144079	1
UHRF1	-1.43103	9.02e-16	1.02e-14	1
GPC6	0.644955	4.61e-05	0.000115691	1
FAM120B	0.173748	0.000511058	0.00108512	1
MFHAS1	-0.262025	0.00659226	0.0114444	2
RELN	-0.957477	8.22e-05	0.000198331	2
RASGRF2	0.862149	2.05e-12	1.46e-11	1
MAMDC2	1.70309	3.15e-19	6.11e-18	1
ZNF341	-0.148787	0.00291699	0.00543082	1
JUN	0.410206	0.0104145	0.0173966	1
SHKBP1	0.271152	0.000129064	0.000301712	2
RBP1	1.98017	8.02e-29	8.96e-27	1
EVA1C	1.1213	2.56e-17	3.68e-16	1
SESN2	0.251772	0.00364722	0.00667306	1
PLXDC1	-0.36555	0.00297344	0.00552642	1
HNRNPL	-0.260701	2.41e-10	1.28e-09	1
EPB41L5	-0.351615	5.89e-06	1.7e-05	4
ARHGEF10	0.179255	0.0232757	0.0363157	1
GOLGA4	-0.295046	0.000301075	0.000663662	1
ATPAF2	-0.179416	0.00326283	0.00602358	1
DAPK1	-0.815906	3.37e-08	1.34e-07	1
TDP2	0.46017	4.48e-09	2.01e-08	1
ATG14	0.164715	0.00032064	0.000704094	1
TTC38	-0.543461	4.49e-09	2.02e-08	1
CES1	1.75073	6.84e-15	6.84e-14	1
RBL1	0.226536	0.00402391	0.00728772	1
POU5F1B	-1.38116	2.08e-19	4.16e-18	1
KRT23	2.66071	1.4e-12	1.02e-11	1
PNKD	-0.370136	0.00035255	0.000768384	1
MAMLD1	1.85013	1.17e-27	1.09e-25	1
UBC	0.240091	9.48e-05	0.000226435	1
HAPLN1	1.02638	0.00692195	0.0119649	1
HIST1H2BF	-1.75661	6.5e-10	3.27e-09	1
MLC1	1.99872	1.03e-11	6.67e-11	1
PYROXD2	-0.482126	0.00052073	0.00110375	1
BYSL	-0.588751	9.79e-17	1.28e-15	2
AHDC1	0.651874	4.77e-14	4.27e-13	2
KLHL2	0.508729	8.02e-11	4.6e-10	4
CSPG4	1.14112	5.59e-11	3.27e-10	1
FAM214A	-0.197382	0.00906581	0.0153397	4
PAK1	0.647023	3.27e-09	1.5e-08	1
FRAS1	-0.464523	0.0053623	0.00948517	3
TPX2	-2.04847	2.89e-29	3.55e-27	1
ATP9B	0.180954	0.00135482	0.00267826	1
TLN1	0.749241	9.63e-18	1.49e-16	2
LILRB2	-0.336125	0.0260489	0.0403081	1
ZNF131	-0.215506	5.49e-05	0.000136387	2
TRIM33	-0.200185	0.00488612	0.00870302	2
SP140L	0.826635	2.69e-08	1.08e-07	1
SLC4A8	0.371157	0.0143531	0.0233388	1
SPECC1L	-0.192433	0.00237874	0.00450286	1
LRRC37A4P	-0.692068	0.00114699	0.00229797	1
B4GALNT1	1.21372	5.88e-13	4.53e-12	1
SHC1	0.168767	0.00113103	0.00226797	1
GINS1	-0.354088	0.00232735	0.00441693	1
PIK3R5	-0.567649	4.13e-05	0.000104262	1
GLT8D2	0.598489	1.28e-05	3.52e-05	1
UTRN	-0.492389	5.88e-06	1.69e-05	3
SIGLEC9	-0.497569	0.000460286	0.000982754	1
INTS6	0.211259	0.00694078	0.0119918	1
SEC14L5	-0.63963	0.00134546	0.00266145	1
HSPA1L	0.384742	1.15e-07	4.23e-07	1
PPP3CA	-0.899306	3.9e-13	3.07e-12	1
SLC27A3	0.753314	5.31e-14	4.73e-13	1
PPIL4	0.190103	0.000343134	0.000749292	1
NPC2	0.375556	0.000432651	0.000928917	1
SLCO2A1	0.785101	1.82e-08	7.47e-08	1
PRDM16	1.1657	5.98e-11	3.48e-10	2
FRMD5	0.405877	0.0244897	0.0380744	1
BTN3A1	0.245088	0.0125886	0.0207072	1
LAMP3	0.594685	0.00725493	0.0124831	1
NOP9	-0.128906	0.00608545	0.0106369	1
KBTBD3	0.315747	4.83e-07	1.63e-06	1
IGHG2	-1.15727	0.000893965	0.00182194	1
SLC8B1	-0.202861	0.00245729	0.00463679	1
RBFOX1	2.7127	1.04e-19	2.18e-18	1
P4HA3	-0.406486	0.0320883	0.0487086	1
ALCAM	-0.748049	9.22e-12	6e-11	1
ABHD2	-1.02436	1.88e-10	1.02e-09	1
TRIM29	2.4791	1.53e-13	1.28e-12	1
P2RX5-TAX1BP3	-0.281632	0.000335951	0.000734739	1
CDS1	-0.317387	8.47e-05	0.000203971	1
RAB3A	-0.248974	0.0133919	0.0219131	1
ADAM19	0.842063	3.06e-07	1.06e-06	1
ADAMTS16	-0.781614	0.000169405	0.000389592	1
PPFIA3	-0.425933	0.000353213	0.000769476	3
RANBP6	0.157372	0.00575124	0.0101105	1
NBPF8	-1.08142	7.04e-16	8.14e-15	1
DEPDC5	0.164766	0.000522708	0.00110743	2
MAPRE1	0.428853	6.47e-20	1.4e-18	2
LTBP1	0.487059	0.000681459	0.00141689	1
RYR1	0.873231	2.33e-05	6.13e-05	2
TRIP12	0.162017	0.00697173	0.0120408	3
CPEB1	1.58771	3.59e-20	8.09e-19	1
PLD1	1.00794	1.31e-12	9.62e-12	2
CDC6	-0.854212	1.44e-09	6.93e-09	1
AKNA	0.260125	0.00522537	0.00926251	1
KIF2A	0.288281	0.00246579	0.00465188	1
PICALM	-0.209997	0.000202687	0.000460217	1
ADAMTS2	-1.01242	1.5e-08	6.22e-08	1
TCF4	0.58444	3.4e-08	1.35e-07	1
NKTR	-0.520737	3.5e-08	1.39e-07	1
NAALADL2	-1.07497	2.29e-11	1.42e-10	1
CPAMD8	1.74402	1.61e-21	4.74e-20	2
TIAM1	0.528795	8.39e-05	0.000202343	1
CDH24	-0.305105	0.00067211	0.00139824	2
PBX1	0.961079	4.63e-22	1.52e-20	1
GGA1	-0.295245	3.25e-08	1.29e-07	1
DDX24	0.331644	6.22e-12	4.14e-11	1
ALYREF	-0.166327	0.0155043	0.0250472	1
MEGF10	0.934378	7.87e-07	2.58e-06	1
TRAF2	-0.331799	9.37e-07	3.03e-06	2
C6orf62	-0.219175	8.39e-06	2.37e-05	1
PROX1	0.576303	0.0108349	0.0180531	1
BMP6	-0.988187	2.13e-06	6.55e-06	1
SCN3A	0.715583	0.000159224	0.00036857	1
VIT	2.28173	4.69e-19	8.83e-18	1
SSRP1	-0.201732	3.26e-06	9.77e-06	3
ASXL2	0.192585	0.0268588	0.0414314	1
SNAI1	0.391971	0.0169068	0.0271086	1
ZFPM2	1.52597	1.97e-12	1.41e-11	4
PIEZO2	0.825203	4.81e-07	1.62e-06	1
KCTD10	0.31763	9.52e-06	2.66e-05	2
CSRP1	1.87572	7.69e-31	1.39e-28	1
NTM	-1.26798	8.6e-08	3.22e-07	1
NFRKB	-0.170528	0.00255353	0.00480659	1
ASAP1	0.426309	3.09e-05	7.97e-05	1
[truncated: 500 more rows]
