# Supplementary material for: Mapping the Germline and Somatic Mutation Interaction Landscape in Indolent and Aggressive Prostate Cancers
Source: J Oncol. 2019 Nov 13;2019:4168784. doi: 10.1155/2019/4168784 (PMC6878815; doi:10.1155/2019/4168784)
Supplement: Supplementary Materials — Supplementary Table SA: a comprehensive list of single-nucleotide polymorphisms (herein called genetic variants) and genes associated with increased risk of developing prostate cancer and published GWAS reports denoted by the PubMed ID and actual reference from which the data were extracted. Supplementary Table S1A: a complete list of somatic mutated genes found to be significantly differentially expressed in indolent (sheet-1) and aggressive (sheet-2) tumors matched with controls. Supplementary Table S1B: a complete list of nonsomatic mutated genes found to be significantly differentially expressed in indolent (sheet-1) and aggressive (sheet-2) tumors matched with controls. Supplementary Table S2: a comprehensive list of somatic mutated genes in indolent (sheet-1) and aggressive (sheet-2) PCa obtained from TCGA. Supplementary Table S2A: a complete list of somatic mutated genes found to be significantly differentially expressed in only indolent PCa, only aggressive PCa, and both tumors. Supplementary Table S1: a complete list of significantly differentially expressed somatic mutated genes distinguishing patients with indolent PCa from patients with aggressive PCa. Supplementary Table S3A: a complete list of germline mutated genes significantly associated with indolent PCa. Supplementary Table S3B: a complete list of germline mutated genes significantly associated with aggressive PCa. Supplementary Table ISN4: molecular networks enriched with germline and somatic mutations in indolent PCa. Supplementary Table ISN5: molecular networks enriched with germline and somatic mutations in aggressive PCa. [file 4168784.f1.zip › 4168784.f1/Supp_Table_S1B.xlsx]

## Sheet: Indolent_sign_no_somatic_info
Supplementary Table S1B - A complete list of non-somatic mutated genes found to be significantly differentially expressed in indolent tumors matched with controls.
Gene name	logFC	P.Value	adj.P.Val
MSRB1	0.33936	7.74e-05	0.000236958
PNCK	1.26742	1.37e-10	1.32e-09
C9orf152	-1.24992	1.07e-25	2.37e-23
CLMP	0.610104	0.000175312	0.00050142
AACS	-0.34463	9.72e-06	3.59e-05
RPS11	-0.220605	0.016275	0.02968
ELMO2	-0.232174	0.000401418	0.00106528
CREB3L1	-0.999418	7.68e-13	1.19e-11
PNMA1	0.96496	1.09e-13	2.01e-12
HAUS2	0.189109	0.00031711	0.000859747
SAMD4A	0.590758	3.19e-05	0.00010686
TRAF3IP2-AS1	0.390961	2.33e-07	1.17e-06
SNORA42	-1.39335	4.84e-14	9.65e-13
BX324167.2	-1.50754	8.32e-12	1.03e-10
SMARCD3	1.01842	1.27e-14	2.87e-13
ERCC5	0.148231	0.0276991	0.0474739
AP002884.3	1.26303	1.62e-14	3.62e-13
C10orf25	0.189564	0.0269765	0.0464361
EDN1	0.738248	0.000228035	0.000637183
AP003559.1	-1.12839	3.25e-12	4.37e-11
PDCL3	-0.222025	0.000434127	0.00114254
AEN	-0.262943	0.00688876	0.0137551
DECR1	-0.261756	0.00254048	0.00566073
IRAK1	-0.466633	6.82e-09	4.61e-08
RPS18	-0.379899	4.73e-05	0.000151929
AL122010.1	-0.408133	2.39e-07	1.19e-06
SLC10A7	-0.680674	8.13e-05	0.00024787
BRIX1	-0.13997	0.0205242	0.0364584
PXYLP1	0.265272	0.000407454	0.00107926
LMAN1	-0.212584	0.0181401	0.0326962
AC232271.1	-0.478432	0.000795287	0.00197941
BOLA3-AS1	1.19749	1.61e-19	1.03e-17
STYK1	-0.631089	6.14e-07	2.83e-06
AC020978.5	-1.4563	1.21e-20	1.01e-18
CRNKL1	-0.324586	3.45e-09	2.47e-08
NIFK-AS1	0.357185	6.05e-08	3.4e-07
RTN1	-0.996051	5.93e-08	3.33e-07
HIC2	-0.275717	0.000324296	0.000877166
KLHL14	1.86609	9.23e-16	2.7e-14
AC016394.1	-0.528261	1.33e-05	4.8e-05
TBX10	-1.8093	1.51e-06	6.45e-06
UTY	0.219783	0.0111904	0.0212244
CENPQ	0.372635	3.04e-08	1.81e-07
REEP6	-0.381588	0.00894764	0.017373
ATP5G2	-0.315006	4.09e-05	0.000133489
ERG	-1.95364	6.15e-07	2.83e-06
PRKAG2-AS1	-0.383932	0.00625589	0.0126272
AC105285.1	-1.07098	8.24e-21	7.23e-19
PARN	0.187853	1.34e-06	5.8e-06
CYTH1	-0.228995	0.00107491	0.00260055
DIRAS1	-0.437137	0.00022024	0.000616993
PNPT1	-0.290816	1.98e-06	8.29e-06
AC132872.4	-0.810388	0.000203846	0.000574736
MIER1	0.288973	3.3e-05	0.000110082
AC008946.1	0.50156	1.18e-05	4.28e-05
AC005674.2	0.719436	6.67e-05	0.000206853
PDE1C	2.10184	1.2e-14	2.73e-13
AP003469.4	0.322901	0.00403966	0.0085813
AGPAT1	0.229791	0.000122181	0.000360365
INIP	-0.138924	0.0110015	0.0209027
AFDN-AS1	-0.74956	2.01e-08	1.24e-07
MAX	0.197525	2.48e-06	1.02e-05
AC020558.2	-0.476549	0.00213064	0.0048354
FER1L5	1.01092	4.48e-08	2.58e-07
PIR	0.430095	1.14e-05	4.16e-05
CXCL13	2.25137	4.56e-08	2.62e-07
HERC2P2	-0.40526	0.0163606	0.0298065
SORL1	0.338946	0.014566	0.0268395
NAT10	-0.145027	0.00187276	0.00429885
TCEANC2	0.209099	0.000250044	0.000691553
C15orf41	1.14527	6.81e-20	4.61e-18
HEIH	0.46266	8.63e-10	6.96e-09
DHRS11	-0.449891	7.64e-11	7.77e-10
PCAT19	-0.439455	0.0268312	0.0462099
AL691482.3	-0.695431	0.0137433	0.0255098
AC026362.1	-0.521126	2.48e-05	8.47e-05
ADNP-AS1	-0.226903	0.0050103	0.0103753
TMC3-AS1	-0.610812	1.38e-06	5.96e-06
CDC25B	0.221438	0.0283498	0.0484494
AC100803.3	-1.66209	5.12e-10	4.35e-09
USP6NL	-0.210484	0.00180151	0.00414615
BBS12	0.305674	0.000910345	0.0022338
HIST1H1PS1	-0.890099	8.62e-05	0.000261332
LRGUK	-1.05088	1.63e-10	1.54e-09
TEK	0.352603	0.0147009	0.0270502
FAAHP1	-0.526463	0.0146565	0.0269793
CPNE4	-0.881069	5.31e-10	4.5e-09
GTPBP1	-0.129456	0.00240595	0.00538788
GRK5	0.643637	2.22e-08	1.36e-07
AP1S2	0.419026	2.8e-06	1.15e-05
TMEM52	-0.999771	2.7e-09	1.98e-08
ZNF212	-0.12256	0.010307	0.0197132
ACBD3	-0.174301	0.01565	0.0286422
AC093797.1	-0.655996	0.000782077	0.00194987
GDPD5	-0.323396	0.0120875	0.0226877
SMYD3	-0.532358	1.05e-08	6.83e-08
RRN3P2	0.758023	1.03e-06	4.54e-06
CAVIN3	0.989011	5.47e-09	3.76e-08
LTBP4	0.386916	0.014787	0.0271924
CIDECP	0.367498	6.57e-08	3.66e-07
AC092171.2	-0.418501	0.000413033	0.00109264
VWA5A	1.17147	1.83e-12	2.61e-11
ABR	0.152223	0.0100985	0.0193466
STK17A	0.241398	0.00298487	0.00653733
FOXE1	1.11781	0.000246615	0.000682683
C2CD3	-0.15166	0.0140853	0.0260685
CNPY4	0.691682	9.68e-14	1.82e-12
CD38	1.09449	0.00459734	0.00962287
AC124242.1	0.271274	0.0209665	0.037114
ZNF257	1.13815	8.56e-07	3.84e-06
DUSP4	1.19843	8.91e-08	4.85e-07
CFAP157	-0.632874	2.15e-08	1.32e-07
FOXM1	-1.1412	4.9e-13	7.91e-12
MAOA	-0.36352	0.0100588	0.0192806
BPIFB2	-1.41816	0.000163377	0.000470644
GYPC	0.863055	5.13e-09	3.56e-08
PSMG4	-0.385171	4.72e-07	2.23e-06
RNF4	-0.199535	3e-05	0.00010079
CDK8	0.258206	8.04e-06	3.01e-05
EMC1	-0.353566	4.91e-08	2.81e-07
HDAC7	0.138651	0.00686556	0.0137133
HIST1H2AD	-1.07542	3.05e-07	1.49e-06
CHST15	0.969007	4.49e-10	3.86e-09
CDK1	-0.429448	0.0149877	0.0275289
RPS28	-0.489984	2.12e-05	7.33e-05
COQ9	0.18957	0.0048295	0.0100483
GCC2	-0.396757	2.89e-05	9.74e-05
PLXNA1	0.225364	0.0125528	0.0234798
WBP4	0.465212	3.61e-12	4.82e-11
KIAA0100	-0.202107	0.0268677	0.0462684
C8G	-0.38565	0.00655103	0.0131535
CRELD2	-0.433426	2.42e-05	8.29e-05
CD82	0.683644	2.41e-10	2.21e-09
PMM1	-0.280179	0.00605149	0.0122708
VAX2	-1.00364	8.63e-05	0.000261662
PPM1A	-0.163023	0.01206	0.0226479
INTS1	-0.276253	0.000118014	0.000349136
CAMTA1	0.253446	1.19e-05	4.3e-05
AC093157.1	-0.235172	0.0047853	0.00996873
GMPPA	-0.274842	0.000821421	0.00203648
FAM198A	0.703575	3.26e-06	1.32e-05
PTP4A2	0.426828	1.41e-13	2.53e-12
EMILIN1	0.57012	0.000868125	0.00214018
CHFR	-0.249432	8.04e-06	3.01e-05
NDUFS4	0.230952	0.00129161	0.00307398
ID1	1.79645	5.41e-14	1.07e-12
COL18A1	0.523312	3.4e-06	1.37e-05
STPG1	0.267034	0.000363451	0.000973074
SF3B6	-0.144112	0.0202777	0.0360842
CDCA4	0.206786	0.00321018	0.00698142
AL021707.3	-0.578572	0.000511664	0.00132784
AC112491.1	-0.673106	3.81e-06	1.52e-05
AC023509.3	-0.393852	0.0163901	0.0298544
C9orf16	0.315124	0.00302153	0.00661135
AC015712.1	-0.356888	0.00224014	0.00505588
FUS	-0.221074	0.000368245	0.000984052
CXorf56	0.16336	6.03e-05	0.000188771
MTMR14	-0.128298	0.0120712	0.0226594
NPR1	0.79218	3.53e-08	2.08e-07
ASS1	1.18891	3.97e-12	5.24e-11
RALY-AS1	-0.271631	0.00672363	0.0134589
EMC8	0.20807	0.00148677	0.00349333
SEC23IP	-0.295288	6.32e-05	0.000197194
RGS4	0.461685	0.0115787	0.0218508
LINC01679	1.4954	5.76e-14	1.14e-12
SNX6	0.232881	0.000116516	0.000345087
AC108488.1	0.42736	7.62e-06	2.87e-05
POLG	-0.140141	0.00646925	0.0130133
ADAM23	0.612505	0.000724774	0.00182137
ZNHIT2	-0.30237	0.0061192	0.0123894
RUNDC3A-AS1	-1.01863	3.51e-09	2.51e-08
RAG1	0.956034	1.86e-07	9.5e-07
TMEM104	-0.226161	0.000714306	0.00179781
AL449212.1	-0.644654	6.99e-05	0.000215999
LRRC8A	0.181954	0.00266466	0.00590513
OGFOD2	-0.23921	0.00230688	0.00518746
GNA11	0.243233	1.02e-05	3.76e-05
PABPC1P4	1.22354	8.73e-16	2.57e-14
NME1-NME2	-0.475726	0.000827768	0.00204973
CAPN1	0.314745	1.16e-07	6.2e-07
GRIK2	0.816946	5.72e-06	2.2e-05
UPF3A	-0.266408	9.21e-06	3.42e-05
LAGE3	-0.246042	0.0108767	0.0206849
CHST6	1.33931	1.49e-11	1.74e-10
UNC13B	-0.333282	0.00261856	0.00581173
AL391121.1	-0.267125	0.0172256	0.0312435
ZBED1	-0.342229	1.29e-09	1.01e-08
SDC2	0.783806	6.57e-08	3.66e-07
SARS	0.135388	0.00907316	0.0175889
QKI	0.455754	3.43e-06	1.38e-05
OFD1	-0.185333	0.00208048	0.00473056
PDP1	-0.427648	1.6e-05	5.64e-05
AL590867.2	-0.321983	0.0199289	0.0355484
AC011487.1	-1.93246	3.46e-11	3.76e-10
AC138392.1	0.447055	0.0264693	0.0456719
GNG12	0.471986	1.76e-09	1.34e-08
HABP4	0.628333	9.35e-15	2.18e-13
TMEM125	-0.668683	7.45e-09	5e-08
CNTN2	1.06722	4.65e-06	1.83e-05
UBN2	-0.218729	0.00348947	0.00752973
FUT4	0.215433	0.000951371	0.00232611
HIST1H2BJ	-0.501504	0.00424695	0.00896891
LINC00675	2.46042	1.47e-16	5.17e-15
AC106820.3	-0.458083	0.00120699	0.00288976
HGH1	-0.490703	1.1e-07	5.87e-07
TMEM11	-0.222113	0.00117204	0.00281339
AGPS	0.736839	9.75e-10	7.78e-09
TARID	0.59901	0.00240098	0.00537806
SPACA6	0.491642	7.31e-05	0.000225048
PCCB	-0.381203	3.18e-05	0.00010655
UNG	0.147025	0.0117469	0.0221273
MRM3	-0.193215	0.0143283	0.0264623
GSTP1	2.08222	1.34e-25	2.83e-23
DCUN1D5	-0.366123	1.72e-07	8.83e-07
ARHGAP15	0.577658	0.000141248	0.000411399
LTBR	-0.33136	1.64e-06	6.99e-06
TDRKH	-0.234699	0.0155796	0.0285332
NBPF3	-0.266376	0.0125326	0.0234468
DOCK11	0.374042	0.00699857	0.0139532
RPRD1B	-0.230648	0.00163811	0.00381245
CHMP7	0.235597	8.71e-05	0.000264149
WASHC3	0.154789	0.0228571	0.0400925
SMTNL2	1.31091	1.59e-06	6.77e-06
ADRA1A	1.53661	1.52e-08	9.59e-08
ZNF350	-0.996527	2.05e-19	1.28e-17
GIPR	0.97974	1.73e-05	6.08e-05
CDC20P1	1.32941	7.36e-12	9.27e-11
AC022034.2	0.701802	0.00403964	0.0085813
BST1	0.750704	1.27e-07	6.72e-07
GORAB	0.175871	0.00990491	0.0190284
NADSYN1	-0.185928	0.00617801	0.0124943
RGS14	0.331044	0.000997084	0.00242661
KRT15	1.52239	0.000399133	0.00105968
AC009549.1	1.30742	2.51e-13	4.31e-12
FHL1	1.40694	1.3e-10	1.26e-09
RTN4RL1	0.494036	0.00526243	0.0108269
SMC6	0.37085	3.81e-08	2.23e-07
ARMC6	-0.553968	2.77e-13	4.72e-12
LPIN3	0.443529	0.00100567	0.00244525
RSU1	0.487257	3.59e-10	3.15e-09
RPL4	-0.238687	0.00496788	0.010299
MAD2L1	-0.303847	0.00426647	0.00900499
RBPMS	1.11797	1.2e-12	1.78e-11
E4F1	-0.236459	0.00258196	0.00574087
C16orf62	0.27663	1.3e-05	4.67e-05
CHMP2B	0.186029	0.00848603	0.016571
RPS21	-0.257386	0.0208995	0.037011
IRX3	0.494491	0.000348788	0.000936811
ELFN1	0.684709	1.24e-06	5.41e-06
RBM6	-0.245566	0.00748298	0.01481
CYSTM1	0.285236	0.00153349	0.00359302
UBE2N	-0.23126	0.000196833	0.00055641
AC138696.2	-0.374867	0.0211134	0.0373395
IGSF8	-0.527904	2.79e-10	2.51e-09
AC083799.1	-0.23893	0.0202739	0.0360835
IFITM10	0.851259	3.09e-10	2.76e-09
LMO4	0.808106	3.72e-15	9.55e-14
C16orf71	-0.285482	0.00345481	0.00746105
HDAC3	-0.127986	0.00483781	0.0100645
SCHIP1	0.96187	1.15e-06	5.02e-06
KRCC1	0.223633	0.00167264	0.00388252
AC004803.1	0.252072	0.000111985	0.000332526
AC093278.2	0.469121	0.00080113	0.00199153
PIGL	-0.236541	0.0117608	0.0221468
MOB1B	-0.390803	4.75e-08	2.73e-07
MRPL57	-0.22074	0.00541167	0.0111068
DNAJC30	-0.162147	0.0100136	0.0192
HUS1	-0.201551	0.00299275	0.00655148
AP001636.2	-1.33729	1.15e-08	7.4e-08
OLFML2A	1.07093	3.38e-11	3.68e-10
HID1	-0.872047	3.42e-20	2.53e-18
PPP1R14BP3	-0.756159	6.77e-08	3.77e-07
ZNF667	-0.411081	5.67e-07	2.64e-06
AC132219.2	-0.258389	0.0194491	0.0348104
POLD2	-0.573586	1.13e-11	1.36e-10
PPM1H	-0.924907	3.79e-17	1.49e-15
ACOT2	0.222962	0.0274025	0.0470049
NFYC	0.0863347	0.0219936	0.0387622
HIST1H4I	-0.743664	2e-08	1.23e-07
PLSCR4	0.87576	7.68e-09	5.14e-08
PPARGC1A	1.68667	2.59e-14	5.54e-13
ETFA	-0.226614	0.00235962	0.00529185
ZNF146	-0.450088	2.04e-11	2.31e-10
MANF	-0.414427	1.53e-05	5.42e-05
EIF4E2	-0.156931	0.00191439	0.0043884
LINC01607	-0.595922	0.000872773	0.00215077
ZNF487	0.265298	6.36e-05	0.000198363
GJB5	2.3284	3.18e-12	4.29e-11
CYP3A5	2.0923	2.7e-14	5.75e-13
AC007342.9	-0.514189	0.00436265	0.0091817
CENPJ	0.260087	0.000319543	0.000865452
ATP6AP1L	-0.228901	0.0266991	0.0460038
PITX1	0.50523	0.0257758	0.0445964
AKIRIN1	0.203011	0.00575645	0.0117267
FHDC1	0.426466	0.00508684	0.0105066
RDX	0.231305	0.00754096	0.0149168
CELSR3	-0.839612	9.48e-05	0.000285432
SLC34A3	-0.720542	0.000181195	0.000515924
FGD5-AS1	0.346561	4.47e-08	2.58e-07
CHRNB1	0.820525	1.11e-14	2.55e-13
CAMK2B	-0.899664	1.62e-06	6.89e-06
MRTO4	-0.33819	1.19e-06	5.18e-06
TMEM241	-0.994606	2.16e-21	2.14e-19
TTC3	-0.177082	0.00134741	0.00319316
C1QBP	-0.275147	0.00060946	0.00155577
NDUFB8	0.250909	0.00494473	0.0102556
SGF29	0.250313	0.0018522	0.00425485
ADAMTS9-AS1	1.81402	1.22e-10	1.19e-09
TMEM248	-0.110333	0.00972305	0.0187227
AC008105.2	-0.798711	1.46e-06	6.26e-06
AL606834.2	-0.265317	0.0240843	0.042005
GRHL1	0.245999	0.0176947	0.0319967
SRMS	-1.19951	1.84e-06	7.78e-06
PSTK	-0.301469	2.99e-05	0.000100707
TRIM45	0.247909	0.00963472	0.018572
SLC2A10	-0.447094	0.000242661	0.000673052
PAQR3	0.346574	0.00151377	0.00355133
AC009014.1	-2.44754	1.39e-07	7.3e-07
TCP1	-0.399953	1.69e-10	1.59e-09
AC008537.2	-0.491013	5.32e-07	2.48e-06
TGFB2-AS1	0.575811	0.00412998	0.00875198
VWCE	1.66994	3.07e-22	3.67e-20
ARHGEF26	-1.32702	1.78e-21	1.82e-19
AC006213.3	-0.87437	1.21e-09	9.5e-09
SCRN1	0.843211	6.87e-10	5.67e-09
AC011815.1	-0.351158	0.00186567	0.00428364
COQ10A	0.35236	1.46e-06	6.27e-06
DDI2	-0.517423	4.21e-13	6.9e-12
KIAA0930	0.363955	9.31e-09	6.14e-08
TANC2	-0.309496	0.00241495	0.00540408
ZNF511	-0.601156	1.04e-07	5.57e-07
PGM1	0.413131	1.41e-06	6.07e-06
CPD	-0.40999	5.32e-06	2.06e-05
SNCAIP	0.699729	0.000366064	0.000978932
ANXA8	2.02848	1.27e-09	9.95e-09
MNX1-AS2	-2.27777	9e-11	9.04e-10
ZNF726	-0.377198	0.00798702	0.0156997
HLA-DOA	0.713879	1.08e-05	3.96e-05
TANK	0.292511	7.4e-07	3.36e-06
RCAN1	0.379699	0.00113507	0.00273033
PELI3	0.333977	6.37e-06	2.43e-05
AL138756.1	-0.348417	0.00222369	0.00502246
DNAJB4	1.16481	2.68e-14	5.72e-13
NTN4	1.02351	4.69e-09	3.27e-08
WFIKKN1	-0.522356	0.00477704	0.00995379
HSPA2	0.863366	4.83e-08	2.77e-07
SERP1	-0.356011	1.57e-05	5.57e-05
AC098679.1	-1.11832	1.51e-11	1.76e-10
CNTNAP3B	0.561866	0.0102669	0.0196427
TACR2	1.13465	1.37e-08	8.75e-08
GPR135	0.579568	4.82e-09	3.36e-08
PIGG	-0.293647	4.84e-08	2.77e-07
JAK2	0.522033	2.44e-08	1.48e-07
TM9SF4	-0.319645	1.95e-09	1.47e-08
BICD1	-1.71112	7.72e-26	1.78e-23
HERC6	-0.282916	0.0128337	0.0239541
DCAF11	-0.198182	1.85e-05	6.48e-05
USP9Y	-0.4088	0.00203839	0.00464492
CASP1	1.03759	2.35e-11	2.64e-10
PRRT1	0.653759	7.31e-10	6e-09
PLA2G4C	-0.397974	0.0122872	0.0230251
ANKDD1A	0.674502	4.48e-11	4.75e-10
ICA1L	0.735185	5.92e-16	1.79e-14
RAC1P2	0.223373	0.0280023	0.0479445
CASC10	1.13507	3.07e-14	6.44e-13
OTUD7A	-0.238636	0.0198974	0.035499
AQP11	-0.696223	3.11e-05	0.000104288
ZBED6CL	0.228644	0.0244113	0.0425109
CCDC60	0.817	0.00544575	0.0111703
IFNAR1	-0.231378	4.57e-05	0.000147326
TALDO1	-0.249742	0.000929173	0.00227667
SQLE	0.347567	0.00615467	0.0124512
EIF5A	-0.230763	0.00798644	0.0156997
FAM49A	0.55941	2.22e-07	1.12e-06
YTHDC2	-0.310915	0.000218715	0.000613188
AL138781.1	0.630319	0.000131228	0.000384891
PLRG1	0.143437	1.37e-05	4.9e-05
EHD2	1.05682	6.9e-12	8.74e-11
UBE2Q2P2	-0.300798	0.00450504	0.00945761
ZNF614	-0.828066	5.56e-12	7.15e-11
PARD6G	0.602992	9.62e-14	1.81e-12
IQANK1	-1.21386	5.11e-20	3.61e-18
FGF12	0.701743	0.0180826	0.0326117
NPIPB5	-0.666452	0.000668058	0.00169153
GRPEL2	-0.255493	2.58e-05	8.8e-05
HNRNPK	-0.140542	0.00282568	0.00622345
UBE2J1	-0.466093	2.38e-08	1.45e-07
TCFL5	0.164861	0.00584959	0.0118993
TLR5	0.296491	0.0050723	0.0104859
ELF1	0.489359	1.64e-06	6.96e-06
SAFB2	-0.130033	0.0161943	0.0295562
HHIPL1	0.570019	0.000125971	0.000370772
NEURL3	1.49288	2.72e-10	2.45e-09
ZSCAN12	-0.260705	0.0116263	0.0219249
E2F4	0.171915	0.00068316	0.00172479
MEX3D	-0.715757	1.65e-17	7.09e-16
AC074032.1	0.288142	0.00512004	0.0105656
AC036108.3	1.13236	2.68e-09	1.97e-08
RTL8C	0.453384	9.73e-08	5.26e-07
FBXO3	0.245668	2.62e-07	1.3e-06
DVL1	-0.47997	4.65e-08	2.67e-07
PCED1A	-0.564803	4.47e-10	3.85e-09
AC104170.1	-1.72856	2.57e-23	3.63e-21
PEF1	0.256917	9.42e-06	3.49e-05
ZNF750	1.2764	5.32e-06	2.06e-05
ZFAS1	-0.519835	1.14e-06	5e-06
NOL4L	0.410807	2.05e-09	1.53e-08
AL353622.1	-1.82802	2.14e-21	2.13e-19
SDK2	-0.436526	0.00552137	0.0113078
BAIAP3	-1.0086	2.99e-14	6.32e-13
RABGGTB	-0.463767	8.69e-10	7e-09
PTP4A3	-1.49855	5.41e-16	1.66e-14
ANKRD40	0.300895	1.99e-08	1.23e-07
C1QTNF2	0.749995	2.21e-05	7.63e-05
CALCOCO2	0.268839	3.57e-11	3.87e-10
ZNF542P	-0.375267	9.76e-06	3.6e-05
SPATS2L	0.334803	0.00034657	0.000931262
SLC48A1	0.267192	3.51e-06	1.41e-05
PRCD	0.329532	0.0235139	0.0410997
TDRD9	0.50088	0.0129725	0.0241986
CDK16	-0.18981	0.000124838	0.000367612
BSDC1	-0.163884	0.000372589	0.000994939
ARSK	0.320833	0.000248541	0.000687705
LINC00641	0.594192	3.19e-08	1.89e-07
RNF43	-0.440624	0.000830809	0.00205643
PHF12	-0.705428	1.69e-14	3.76e-13
AL109936.2	-0.727784	2.34e-06	9.71e-06
EPB41L3	1.05744	1.54e-10	1.46e-09
CDKN2B	0.717003	3.41e-07	1.65e-06
ZNF480	-0.298545	3.17e-07	1.55e-06
DDIT4L	1.24734	8.78e-06	3.27e-05
SLC16A11	0.881135	9.99e-05	0.000299475
APOL1	0.700795	1.19e-05	4.31e-05
FAM96A	-0.500658	8.03e-10	6.51e-09
RNF175	1.25167	4.85e-10	4.14e-09
AP2S1	-0.269038	0.017208	0.0312147
ACTRT3	0.907484	7.25e-17	2.69e-15
MME	1.49248	1.81e-07	9.28e-07
AC078814.1	-0.44174	0.000191834	0.000543612
VAT1	0.469704	1.03e-07	5.56e-07
PCNX2	-0.354677	7.99e-06	2.99e-05
MAST4	0.53057	5.79e-06	2.23e-05
CCDC14	-0.554168	4.67e-08	2.69e-07
TUFM	-0.180666	0.00497982	0.010318
EFCAB12	-1.15914	3.77e-13	6.23e-12
KCTD2	0.18546	0.000333014	0.000898461
NR4A3	0.913629	0.0035496	0.00764873
AC000123.2	-0.548215	5.48e-07	2.56e-06
AP002360.4	-1.1057	1.73e-10	1.62e-09
SOCS3	0.669663	0.0158096	0.0289142
UNKL	-0.370678	5.71e-06	2.2e-05
GAS1RR	1.60861	4.73e-14	9.47e-13
ZNF839	-0.191433	0.00194211	0.00444642
AC022387.1	-2.18733	2.41e-17	9.91e-16
CCNA2	-0.889519	8.71e-09	5.76e-08
SOX15	1.54288	2.77e-18	1.36e-16
DNASE1L1	-0.208872	0.00076932	0.00192048
TMEM132A	-1.5438	3.99e-22	4.52e-20
CGRRF1	0.208998	0.00033242	0.000897077
MCAT	-0.388629	2.2e-06	9.15e-06
PIANP	0.925264	5.89e-07	2.73e-06
WNT10B	-0.482369	0.0062619	0.0126363
BAIAP2L2	-1.09311	2.8e-05	9.46e-05
RPL27	-0.210778	0.0142534	0.0263425
EPN1	-0.306487	7.52e-05	0.000231075
LINC00908	1.63663	6.49e-14	1.26e-12
MFSD14B	0.280305	1.7e-05	5.97e-05
GAL	-2.85959	1.06e-25	2.37e-23
SLC30A2	0.566034	0.0230728	0.0404131
RDH11	-0.600429	0.000962505	0.00235146
AUH	-0.252765	0.0129449	0.0241496
PCYT1B	1.34126	1.83e-08	1.14e-07
SLC25A39	-0.404082	1.57e-05	5.56e-05
AC138470.1	-0.670543	7.25e-09	4.87e-08
AMOTL2	0.594899	4.46e-06	1.76e-05
PSRC1	0.529406	5.61e-07	2.61e-06
FOXO1	0.516824	3.62e-08	2.13e-07
KIF5C	-0.582739	3.59e-06	1.44e-05
MRPL37	-0.337866	4.71e-07	2.23e-06
C17orf62	-0.515861	4.34e-12	5.7e-11
PSMA5	-0.159659	0.00791444	0.0155753
AMPD3	-0.473034	0.00378205	0.00808534
AC123912.4	0.993799	2.69e-05	9.13e-05
PIAS1	0.386791	2.23e-07	1.12e-06
ADCYAP1R1	1.11668	2.37e-05	8.12e-05
TMEM134	-0.204919	0.025271	0.0438547
FBXO7	0.143684	0.000129588	0.000380688
CFAP20	0.194055	0.000739297	0.00185408
MAGI2-AS3	1.24072	1.13e-14	2.59e-13
CBX2	-0.666823	0.00037361	0.00099752
OTUD6B-AS1	0.23031	0.000369882	0.000988139
ABI3	0.276793	0.0225832	0.0396951
TFAP2A-AS1	-0.409337	0.0056484	0.0115334
ALDH5A1	-0.18728	0.0175199	0.0317072
FKTN	-0.342361	2.88e-07	1.42e-06
AL512310.7	-0.708154	0.0287735	0.0491006
CRTAP	0.500684	5.87e-15	1.44e-13
RERGL	0.596496	0.00998205	0.0191614
STYXL1	-0.334432	7.4e-05	0.000227597
AC074117.1	-0.566009	6.65e-10	5.5e-09
BLVRB	0.278413	0.0113756	0.0215203
A1BG-AS1	1.1812	1.42e-10	1.36e-09
GALNT10	-0.670956	5.69e-12	7.3e-11
AC127070.1	-0.311588	0.0215196	0.0379958
PRELID2	0.981618	3.49e-12	4.67e-11
MMP24	0.608723	3.96e-06	1.57e-05
SFTPA1	-0.938174	0.00625479	0.0126272
CATSPER2P1	-0.511277	2.34e-07	1.17e-06
SLC25A24	0.457454	5.26e-06	2.04e-05
SLC25A15	-0.625782	4.09e-09	2.89e-08
MRO	1.83792	6.77e-20	4.6e-18
AC009506.1	0.572709	2.28e-12	3.18e-11
FAM84B	-0.779558	7.23e-16	2.17e-14
ZNF287	0.174324	0.00282745	0.00622661
TDP1	-0.27403	4.29e-06	1.7e-05
RFK	-0.485647	1.09e-09	8.64e-09
ARHGAP8	-0.762165	1.29e-11	1.54e-10
TCTN3	-0.147212	0.00994628	0.0190987
ZNF571-AS1	-0.727174	5.11e-05	0.00016289
DNAJB11	-0.289741	6.06e-06	2.32e-05
AC018413.1	1.32257	1.15e-10	1.13e-09
HSD17B13	2.3752	1.02e-10	1.01e-09
FMNL1	-0.265587	0.00832181	0.0162987
SPATA24	-0.458194	1.14e-07	6.1e-07
ADGRG1	0.276612	0.0077075	0.0152119
AL512624.2	-1.23818	0.000797197	0.00198336
SMOC2	-0.625421	7.46e-06	2.81e-05
AC005682.1	0.598137	0.00031379	0.000851373
NDE1	0.543722	1.31e-09	1.02e-08
CDK18	1.18844	1.2e-16	4.24e-15
AL031123.2	-2.28451	4.5e-36	6.91e-33
ANXA2	1.2667	1e-18	5.48e-17
SMG1P5	0.319246	0.022912	0.0401619
WTAPP1	-1.26947	1.32e-06	5.73e-06
HLCS	-0.594687	2.73e-13	4.66e-12
AC024060.1	-0.677754	2.49e-06	1.03e-05
AK1	0.758238	1.31e-09	1.02e-08
PTPN23	-0.165925	0.00384198	0.00820099
C4B	-1.36647	2.4e-07	1.2e-06
TRGVB	-1.88098	2.49e-09	1.83e-08
AC118553.1	-0.327237	0.00199422	0.00455464
GSR	0.18601	0.0209906	0.0371509
PAQR7	1.08692	2.82e-20	2.13e-18
CACNA1C	0.426294	0.00392555	0.00835914
FAM20B	0.27196	7.67e-08	4.23e-07
AP003419.4	-0.888639	2.73e-05	9.25e-05
PDCD6	-0.235824	2.73e-05	9.24e-05
GSEC	-0.43394	0.000235763	0.000655796
2019-09-05	-0.67615	1.08e-09	8.58e-09
AMPH	1.02269	3.95e-10	3.44e-09
ZNF775	-0.227462	0.0145875	0.0268712
BRI3BP	-0.568553	7.65e-11	7.78e-10
UCKL1	-0.173214	0.0158577	0.0289877
COX16	-0.477144	7.56e-08	4.17e-07
SLC23A1	-0.570601	0.00366607	0.00786519
SLC12A7	-0.460978	2.02e-12	2.86e-11
THAP4	-0.17993	0.00800246	0.0157284
RBM4B	0.160856	0.00106106	0.0025701
OGFRL1	0.656873	5.39e-13	8.64e-12
PRKN	0.498628	1.67e-05	5.88e-05
AP000844.2	-1.34368	0.00418596	0.00885127
PYCR3	-0.568479	4.24e-07	2.02e-06
NKAIN1	-1.42768	0.000222562	0.000623215
ATP11B	-0.585005	2.02e-08	1.24e-07
TMEM255B	0.28728	0.0191046	0.0342704
CSDC2	1.00101	3.89e-07	1.87e-06
ABHD5	0.160302	0.022657	0.039802
SIGLEC15	1.02289	8.86e-08	4.83e-07
EXOC4	0.11393	0.0192651	0.0345145
TMBIM1	0.456147	0.000596589	0.00152588
AL596442.2	-1.85646	1.09e-13	2.02e-12
TRMT1	-0.338866	5.83e-05	0.000183457
F2RL2	-1.79303	1.3e-12	1.92e-11
ZDHHC1	0.37046	0.00142416	0.00335779
SLC29A4	-0.42206	0.0256891	0.0444714
BATF2	1.04874	2.22e-09	1.65e-08
MRAS	0.689827	2.79e-09	2.03e-08
CBWD1	-0.229379	0.012641	0.0236183
TRAF6	0.182563	0.00613575	0.0124184
AC099522.2	0.425398	0.003876	0.00826317
AXL	0.711375	4e-07	1.92e-06
LMNB1	-0.569568	4.72e-05	0.000151509
AC025265.1	-0.816417	4.81e-06	1.88e-05
TELO2	-0.380627	2.2e-05	7.59e-05
CD276	-0.331383	0.00107594	0.00260236
KRT80	0.832518	0.00157959	0.00368838
SHE	0.481391	0.000297592	0.00080957
CSNK1E	-0.321729	8.4e-09	5.58e-08
AC011472.1	0.944538	3.59e-13	5.97e-12
AC079880.1	-0.435822	3.57e-06	1.44e-05
KCNQ4	0.779595	2.76e-08	1.66e-07
PIK3C2B	0.184077	0.0278422	0.0476969
NAPA-AS1	-0.320042	0.0032349	0.00703063
C6orf89	0.106532	0.00999281	0.019174
NUPR2	0.803985	0.0123873	0.0231937
RTN4IP1	0.264379	0.000159538	0.000460305
USP15	0.181398	0.000189531	0.00053783
CEND1	1.45722	2.68e-11	2.97e-10
TCEAL2	1.60651	1.5e-11	1.75e-10
PTGER2	0.595833	0.00145349	0.00342123
ESAM	0.294871	0.0185262	0.0333399
LINC01979	-0.606428	0.0258407	0.0446879
GFOD1	0.505147	7.39e-06	2.78e-05
PKN3	0.41177	1.35e-05	4.86e-05
MKLN1-AS	-0.229056	0.026152	0.0451711
CNTD1	-0.612337	4.59e-05	0.000147935
COMMD1	0.171088	0.0228412	0.0400755
FOXN3	0.365552	4.15e-05	0.000135174
NTRK2	0.89898	6.38e-06	2.43e-05
MFGE8	0.471587	0.000740308	0.00185611
TMEM182	0.377257	0.000672134	0.00170092
PFKFB2	-0.372948	0.000250821	0.000693389
AC079328.2	-1.19031	1.12e-10	1.1e-09
RNF167	0.139108	0.0129272	0.0241189
Z83851.1	-0.919345	1.39e-18	7.47e-17
ZSCAN12P1	0.455529	6.31e-07	2.9e-06
LCLAT1	-0.600557	1.27e-11	1.51e-10
ATPIF1	-0.238419	0.00154165	0.00360893
PDLIM1	1.15853	2.99e-16	9.79e-15
AL360270.2	-0.525205	4.06e-05	0.000132643
RNF126	-0.21918	0.00500891	0.0103736
DPM1	0.127913	0.00658477	0.0132126
GPSM1	-0.514558	1.77e-07	9.09e-07
CLIC4	0.810727	5.9e-12	7.54e-11
EFL1	-0.370206	4.43e-07	2.11e-06
GMDS-AS1	-0.409963	1.88e-09	1.42e-08
ALOX5AP	0.585906	0.000115359	0.00034183
AC011462.4	-0.488654	0.00386096	0.00823493
ANKH	-0.2855	0.0194587	0.0348209
NBDY	0.172056	0.0088612	0.0172251
C19orf18	-0.74629	2.36e-06	9.77e-06
SLC8A2	1.40368	2.03e-09	1.52e-08
POLR1B	-0.484906	1.98e-11	2.25e-10
TACC1	0.863537	8.15e-12	1.01e-10
RAD9B	0.461308	3.4e-07	1.65e-06
SAMHD1	0.239083	0.0285039	0.0486856
SH3PXD2B	0.858276	2.7e-12	3.7e-11
ATP13A2	-0.523679	1.84e-10	1.72e-09
PAX6	0.191657	0.00710171	0.0141313
KRT4	2.17181	6.92e-07	3.16e-06
SCG2	0.882894	0.00321036	0.00698142
NLK	-0.154834	0.00854718	0.0166798
SNHG15	-0.426028	1.07e-05	3.92e-05
ITGBL1	-1.0672	8.59e-05	0.00026072
TAP2	-0.354384	0.000195242	0.000552421
EFHD2	0.45393	3.6e-05	0.000119091
CLDN3	-0.966255	8.69e-10	7e-09
ZDHHC3	0.323107	2.04e-08	1.26e-07
GALNT6	1.20325	5.97e-14	1.17e-12
SLC25A4	0.453157	1.28e-08	8.19e-08
CYB5B	0.236004	9.39e-05	0.000283028
NDRG1	-0.351818	0.0109538	0.0208207
CPXM1	1.12527	4.57e-07	2.17e-06
NPM1P27	-0.353605	0.00061545	0.00156954
AL139393.2	-0.295388	0.019299	0.0345685
MAPKAPK3	-0.403703	5.92e-07	2.74e-06
PRKD2	-0.137033	0.0218797	0.0385874
DZIP1	0.989035	2.63e-11	2.93e-10
SEC22C	-0.491383	2.44e-09	1.8e-08
GPR161	0.911475	1.05e-09	8.34e-09
CCNB2	-1.02862	9.39e-12	1.15e-10
PCGEM1	-1.46314	0.00861646	0.0167954
TRGJP2	-2.48516	1.83e-22	2.26e-20
EMC10	-0.288833	3.44e-05	0.000114139
TMEM175	-0.291341	0.000558482	0.00143839
WDR74	-0.243657	0.000261216	0.000719651
AC061975.7	0.966455	9.74e-09	6.37e-08
AC023024.1	-0.966057	1.78e-14	3.92e-13
PURA	0.209014	0.00267373	0.00592077
PCNP	0.298735	1.69e-09	1.29e-08
HOXB-AS1	0.691498	0.000168719	0.000484291
GTF2IRD2B	0.153236	0.00962796	0.0185629
AC018754.1	-0.485489	0.00198944	0.00454517
LNPK	0.217596	0.00114404	0.00275047
NEO1	-0.296779	0.00333557	0.00722727
DDX3Y	0.241983	0.00164719	0.00383118
LGALS3	1.17087	2.59e-12	3.56e-11
MXRA7	1.18622	1.3e-14	2.93e-13
GLT8D1	-0.131325	0.00463793	0.00969462
TMPRSS3	0.523945	0.0200321	0.0357151
AC002553.1	-0.297063	0.0141705	0.0262051
AC022431.1	-0.30056	0.019807	0.035372
SKIV2L2	0.144948	0.0261218	0.0451273
TARS2	-0.143259	0.00548961	0.0112528
ABCF1	-0.113563	0.0166456	0.0302748
ROPN1B	-1.67342	9.71e-14	1.82e-12
RBSN	0.18139	0.000240199	0.000667126
CFAP53	0.285045	0.0102299	0.019576
CD28	-0.650523	0.00290675	0.00638598
SMARCA4	-0.524001	8.5e-19	4.73e-17
SOHLH2	0.95726	0.017259	0.0312948
MRPL14	-0.210727	0.012616	0.0235909
CENPW	0.301789	0.00733576	0.0145515
LINC00992	-2.23744	1.23e-18	6.64e-17
ZBTB21	0.246485	0.0066462	0.0133213
QRICH2	-0.908858	2.34e-15	6.27e-14
CCNB1IP1	0.30751	5.11e-05	0.000162858
TMEM43	0.474567	1.54e-16	5.34e-15
AC009414.2	0.799936	2.11e-09	1.58e-08
KCNG3	-2.29149	5.6e-11	5.85e-10
STAT5B	0.449544	1.13e-15	3.21e-14
C14orf79	-0.181315	0.0272185	0.0467588
SH3D21	-0.744342	2.65e-09	1.94e-08
SHISA4	0.215597	0.0151695	0.0278264
OAS2	-0.816134	8.83e-05	0.000267254
SEC61G	-0.380976	8.79e-05	0.000266069
AC012313.1	-0.159435	0.024133	0.0420859
GLIS3	1.42518	9.92e-17	3.58e-15
DEGS1	-0.326942	0.012474	0.0233443
TMEM50B	0.304645	7.38e-07	3.35e-06
ARHGEF4	0.680317	2.86e-08	1.71e-07
DBNDD1	-1.30529	2.81e-20	2.13e-18
G6PD	-0.143091	0.0207506	0.0367922
ANKRD36	-0.320964	0.0264221	0.0455962
DPH7	-0.228522	0.0072674	0.0144283
GABRP	1.49981	4.08e-05	0.000133148
SCARA3	1.5669	3.22e-19	1.94e-17
EIF3J	-0.312472	1.83e-07	9.36e-07
RTCA	-0.175861	0.00133915	0.00317564
F10	0.861007	4.78e-07	2.25e-06
COMP	-1.66741	9.15e-07	4.09e-06
PLEKHH1	-1.05258	7e-13	1.09e-11
LPCAT4	0.764502	6.64e-13	1.04e-11
CAMSAP2	0.256407	0.000583366	0.00149559
TAL1	0.449182	0.00094237	0.00230563
ACSL1	-0.53271	2.07e-06	8.66e-06
TCAP	1.0382	0.00284445	0.00625956
HCFC2	0.488681	3.82e-12	5.07e-11
AC005253.1	-0.391257	0.00188704	0.0043279
RBBP7	0.580221	1.45e-20	1.18e-18
MOCOS	0.569426	7.11e-07	3.24e-06
C14orf93	0.305934	3.34e-07	1.62e-06
UBE2H	-0.144049	0.00508166	0.0105007
LRRC26	-1.13722	4.24e-06	1.68e-05
C8orf31	1.29402	2.2e-13	3.81e-12
CCNE2	-0.43542	0.000580205	0.0014881
AC000068.2	-0.645577	1.87e-06	7.9e-06
LINC00685	-0.476679	0.0058802	0.0119524
MBTD1	-0.294526	6.93e-05	0.000214468
CWC22	0.210346	2.28e-05	7.86e-05
MT-TY	0.636199	0.0180008	0.0324832
NRDC	-0.297654	5.44e-09	3.74e-08
AC124944.1	-1.62084	2.66e-13	4.55e-12
CCT3	-0.457801	3.58e-10	3.14e-09
SLC3A2	0.225058	0.00460475	0.00963449
OR13A1	-1.54318	2.35e-11	2.63e-10
ZNF121	-0.586355	7.1e-14	1.38e-12
IER5	0.96917	6.49e-11	6.7e-10
MTHFD1L	-0.471544	0.000267719	0.000735687
CMTM4	-0.957148	2.13e-13	3.7e-12
FP565260.6	-0.444026	0.0242367	0.0422349
AP005205.2	-1.14233	7.17e-08	3.97e-07
PSMD10	0.149054	0.00803417	0.0157857
WDR44	0.337944	4.67e-05	0.000150051
HRH1	0.611933	0.000699864	0.00176334
HCG18	-0.184117	0.000432198	0.00113788
C5orf30	-0.829768	5.6e-07	2.6e-06
RNPEP	-0.158905	0.00841432	0.0164501
NUDT16L1	-0.211289	0.00670786	0.0134303
AC053503.4	0.894772	0.000478962	0.00125072
AC009041.4	-0.319638	0.0156354	0.0286212
MED21	0.570016	9.28e-21	8.03e-19
GRPR	-1.35846	5.18e-05	0.000164863
LINC01018	1.31676	1.42e-07	7.43e-07
ZBTB10	-0.733099	4.26e-10	3.69e-09
DCAF13	-0.459937	2.3e-09	1.71e-08
SPTBN2	-1.193	8.94e-27	2.39e-24
BHLHE40	0.651788	0.000415936	0.00109938
TRIM52-AS1	0.301559	0.0010215	0.0024798
WISP1	0.482513	0.00382369	0.00816394
ATP2B4	1.15526	3.84e-11	4.13e-10
CRB3	-0.398299	3.47e-06	1.4e-05
DDX21	-0.485847	1.14e-06	4.99e-06
LRSAM1	-0.276576	1.99e-05	6.94e-05
B3GALT6	-0.676866	9.91e-13	1.49e-11
VMO1	0.844648	2.75e-09	2.01e-08
HADHB	-0.142792	0.0110572	0.021002
MTO1	0.19011	5.12e-05	0.000163166
PLXNB2	-0.228106	0.000748506	0.00187411
P2RX1	1.33741	7.2e-08	3.98e-07
TNIP1	0.191271	0.000286785	0.000782018
TM9SF2	-0.209209	0.00751737	0.0148733
DLG5-AS1	0.56879	4.79e-05	0.000153635
TCTE3	-0.437068	8.61e-05	0.000261256
MESP1	-1.04715	6.9e-05	0.000213337
RHOG	0.23395	0.000491295	0.00128038
HEY1	0.562997	5.82e-06	2.24e-05
MTPN	0.253395	3.25e-05	0.000108593
C21orf33	-1.05392	0.00642492	0.0129313
SNX25P1	-0.436797	0.00198172	0.00453091
IRF2	0.284866	4.71e-06	1.85e-05
HEATR6	-0.154825	0.00716609	0.0142533
GNG7	0.20906	0.00648861	0.0130466
AC096540.1	-0.747023	1.26e-09	9.86e-09
RUNX2	0.574271	3.19e-06	1.29e-05
SRPX	0.74673	7.91e-05	0.000241748
ODC1	-0.769364	1.03e-07	5.53e-07
MBNL3	0.859958	3.5e-08	2.06e-07
SDC3	0.609976	6.1e-10	5.09e-09
NR2F6	-0.339801	6.34e-05	0.000197727
ADORA2B	1.00616	4.61e-07	2.19e-06
AC012085.2	1.69839	1.44e-12	2.09e-11
TMEM218	-0.120633	0.0184124	0.0331512
SOX6	0.758114	1.34e-06	5.81e-06
ZFYVE16	-0.291539	0.000268965	0.000738673
SYNJ2BP	-0.476272	4.7e-07	2.22e-06
AL132780.2	0.305494	0.0124128	0.0232369
E2F2	-0.863038	3.77e-06	1.51e-05
THRA	0.427859	1.13e-09	8.93e-09
TBC1D22A	0.253391	7.4e-06	2.79e-05
ZNF204P	1.41028	3.28e-11	3.59e-10
COL4A6	1.65997	1.02e-13	1.9e-12
NAB1	0.568989	3.02e-11	3.33e-10
ZNF793-AS1	-0.517083	4.31e-07	2.05e-06
TSPAN18	1.39343	3.88e-15	9.91e-14
TRMT10A	-0.329031	2.42e-06	1e-05
ZNF559-ZNF177	-0.729204	2.13e-07	1.08e-06
FRG1JP	0.552514	0.0282745	0.0483441
ZNF532	0.319398	0.00717588	0.0142697
LBHD1	-0.272044	0.002547	0.00567252
CRIP1	0.71139	0.000277742	0.000759494
POLR2J3	0.433401	0.000484206	0.00126316
TMEM64	0.344785	6.64e-05	0.000206066
CDC42EP4	0.769819	3.54e-17	1.41e-15
C16orf58	-0.245216	0.00182883	0.00420483
BRMS1L	0.204734	0.000357144	0.000957441
ASH2L	0.25691	0.000146818	0.000426074
TSLP	1.61076	8.09e-13	1.25e-11
SLC1A3	0.945629	1.04e-08	6.75e-08
CABYR	0.910042	3.22e-10	2.86e-09
FNDC10	-1.54148	5.78e-16	1.76e-14
BCL7B	0.313258	2.04e-08	1.26e-07
MAN2B2	-0.235969	0.00216785	0.00490956
RGS12	0.496385	1.91e-09	1.44e-08
LRRIQ1	-1.07507	3.05e-09	2.21e-08
C1orf53	-0.678413	4.08e-07	1.95e-06
RPL35A	-0.311983	0.000414442	0.00109606
CCDC157	-0.233094	0.0154341	0.0282865
RAB40C	-0.226934	0.00271886	0.00600973
C2orf68	-0.19697	4.46e-05	0.000144362
PRRG3	1.14768	8.81e-06	3.28e-05
BX322234.1	0.570887	1.46e-05	5.23e-05
POTEI	-0.895609	0.00613826	0.0124221
AF001548.2	0.64596	1.01e-08	6.56e-08
FAM124A	0.923991	2.5e-08	1.51e-07
MAP4K2	0.222552	0.00137622	0.003256
AC067750.1	0.208584	0.0256661	0.0444442
CHIC1	0.338253	4.91e-08	2.81e-07
ELOVL1	0.16888	0.0101502	0.0194356
DTD2	-0.431785	3.75e-11	4.04e-10
ACP1	-0.177984	0.00031762	0.000860824
SLC9A7P1	0.44807	0.00683938	0.0136639
ZMYM2	-0.312731	3.11e-06	1.27e-05
OR51C1P	-4.04734	2.29e-22	2.82e-20
GUCD1	-0.220725	0.00090775	0.00222832
LRRN4CL	0.429609	0.0145856	0.0268703
B3GNT6	-2.55175	9.6e-06	3.55e-05
LINC02492	-3.52419	3.55e-25	6.68e-23
C2orf15	-0.580474	4.48e-09	3.14e-08
LPL	0.593479	0.0126712	0.0236652
CA5B	-0.480386	2.54e-06	1.05e-05
FTCDNL1	-0.795049	4.23e-10	3.67e-09
KIZ	0.166318	0.00472164	0.00984392
PLPP1	-0.745852	5.57e-07	2.59e-06
PUDP	0.305252	3.81e-06	1.52e-05
CEACAM19	-0.623083	8.35e-06	3.12e-05
PCOTH	-1.1295	0.00372477	0.00797676
AC026401.3	0.579163	1.06e-07	5.7e-07
HIST1H3D	-0.755792	0.000179983	0.000513029
AL357060.2	0.652896	7.63e-06	2.87e-05
TBC1D15	-0.297289	2.23e-07	1.12e-06
NONO	-0.411122	1.91e-16	6.49e-15
IMPA1	-0.371086	0.000835233	0.00206683
NPM3	-0.418347	0.000307313	0.000834782
RARRES1	1.01481	9.3e-05	0.000280243
AC006329.2	-2.25962	3.69e-11	3.98e-10
B3GNTL1	-0.577665	6.51e-12	8.27e-11
MGAT3	1.02036	2.62e-08	1.58e-07
ARPC5L	-0.189261	0.00659244	0.0132265
MBP	-0.353634	1.47e-05	5.23e-05
TANGO6	0.23749	0.000664138	0.00168276
EXO1	-0.867401	3.92e-06	1.56e-05
SOSTDC1	2.15409	1.56e-15	4.33e-14
PIK3R1	0.77131	9.14e-13	1.39e-11
MAF	0.609587	5.63e-05	0.000177819
DOK5	0.675639	0.000571495	0.00146863
AL078621.3	0.37174	0.00504976	0.0104441
ZMIZ2	-0.276644	2.09e-06	8.71e-06
SLC46A3	0.408601	0.00419912	0.00887683
PTRH2	-0.462019	1.84e-08	1.15e-07
SNORA33	-1.18889	5.1e-11	5.35e-10
C22orf39	0.168151	0.00461442	0.00965095
STAMBP	-0.155067	0.00281254	0.00619821
ADCY2	0.626351	0.000782148	0.00194987
STAMBPL1	-0.622518	3.81e-08	2.23e-07
STAG3L2	-0.191266	0.0266542	0.0459479
FAM178B	1.27848	7.8e-11	7.91e-10
SRM	-0.6649	1.63e-10	1.54e-09
RPP25L	-0.209862	0.0156416	0.0286296
MRPS6	0.521909	2.87e-12	3.9e-11
ANKRD33B	0.879781	5.45e-06	2.11e-05
CDH19	1.18436	0.000493844	0.00128648
SNX8	-0.372873	1.84e-07	9.4e-07
CHURC1	0.335325	2.63e-06	1.08e-05
CCBE1	1.61045	2.61e-09	1.92e-08
WFDC12	1.75601	6.13e-05	0.000191741
SARNP	0.411351	6.19e-08	3.47e-07
SELENON	-0.363074	4.42e-09	3.1e-08
HDAC1	-0.334256	2.25e-05	7.76e-05
SHTN1	-0.599337	5.81e-13	9.26e-12
CNIH1	0.136617	0.0093121	0.0179991
AC005154.1	-0.39859	0.000181155	0.000515924
SH3RF1	-1.24761	3.75e-17	1.48e-15
OIP5-AS1	0.223363	0.000553856	0.00142808
GPR63	-0.526436	2.75e-05	9.31e-05
LMCD1	0.644383	7.98e-06	2.99e-05
BLZF1	0.292715	1.43e-06	6.16e-06
MROH6	0.770805	6.52e-07	2.99e-06
ATRNL1	1.11282	2.84e-07	1.4e-06
AREL1	-0.460535	7.68e-12	9.6e-11
AC104365.1	-1.47729	0.000493431	0.00128558
AC010997.4	-0.518516	0.000142204	0.000413857
DUS1L	-0.917945	2.16e-15	5.84e-14
NEK9	0.187666	0.000683978	0.00172639
CHRM3	-1.27377	0.000461152	0.00120763
KDM2B	0.276381	5.84e-05	0.000183702
WARS2	-0.341621	2.36e-07	1.18e-06
DDO	1.25652	1.14e-12	1.69e-11
NEURL1B	1.13516	2.91e-18	1.42e-16
MINOS1	0.197999	0.0113368	0.0214579
RIMKLA	-1.12042	3.54e-20	2.6e-18
ASF1A	0.166458	0.0121937	0.0228619
TOMM40	-0.332448	8.61e-06	3.21e-05
MBNL1-AS1	1.09854	8.12e-14	1.55e-12
TUBGCP5	-0.165423	0.007028	0.0140058
CD200R1	0.611445	0.00252255	0.00562351
ADNP	-0.163006	0.00306685	0.00670096
UST	0.673735	2.92e-06	1.19e-05
RFFL	-0.481916	8.06e-10	6.54e-09
GSTM5	1.38373	4.09e-11	4.36e-10
AL355001.2	0.298377	0.00660238	0.0132436
PDCD1LG2	0.698379	7.56e-05	0.000232037
AC008063.1	-0.615941	0.0164374	0.0299258
AL022068.1	1.39174	1.45e-07	7.58e-07
PMS1	-0.16027	0.0104664	0.0199829
RAB28	0.123456	0.00643363	0.0129459
MKX	0.494522	0.00301556	0.00659906
ZNF814	-0.547454	4.68e-10	4e-09
TFCP2	-0.201148	0.000197147	0.000557042
KDELR2	-0.383346	3.18e-08	1.89e-07
AC105219.4	-1.10492	9.67e-12	1.18e-10
NLRP12	-2.74909	1.46e-23	2.14e-21
TLE4	0.515374	0.000155685	0.000449538
PKP3	-0.700788	2.99e-13	5.07e-12
RPN2	-0.298456	0.000354451	0.000951051
CTSO	-0.345828	8.99e-05	0.000272141
SDF2L1	-0.275919	0.0253655	0.0440064
IGFBP3	0.92848	5.14e-09	3.56e-08
AC254629.1	-1.20581	0.00297232	0.00651219
DEK	0.263966	1.87e-05	6.53e-05
ACBD3-AS1	-0.555892	0.000396701	0.00105342
AC131097.2	1.19502	4.18e-05	0.000135952
ALB	-1.02102	0.00496989	0.010302
SORBS3	0.268239	0.00485903	0.0101052
ARHGAP24	0.852295	1.17e-10	1.14e-09
AGBL2	0.479477	0.00215143	0.00487658
DOPEY1	0.385571	6.32e-05	0.000197232
TERF1	0.203102	0.000979298	0.00238742
VIPR1-AS1	-0.805588	3.9e-07	1.87e-06
GSE1	-0.365316	1.22e-05	4.43e-05
AL031777.1	-1.07711	4.78e-05	0.000153145
NINJ1	0.465395	8.06e-10	6.54e-09
SFXN4	-0.535738	2.7e-09	1.98e-08
MYL6B	0.307939	0.0138794	0.0257288
AL355312.1	-0.646473	0.00158514	0.00369992
CDKN2AIPNL	-0.20529	0.00888446	0.0172631
CKMT2	0.922348	2.04e-07	1.04e-06
SLC13A3	-1.49253	4.89e-17	1.89e-15
SPRED2	0.296416	0.00481136	0.0100151
BBIP1	0.185345	0.000470193	0.00122939
PLA2G12A	-0.571176	4.09e-13	6.72e-12
N4BP2L1	0.499426	0.000137352	0.000401192
SBDSP1	0.436598	2.24e-09	1.67e-08
TIMP4	1.15803	9.35e-06	3.46e-05
AC009407.1	-2.06939	1.78e-15	4.88e-14
HAUS3	-0.150639	0.010791	0.0205387
PITPNC1	0.398421	0.000600383	0.00153388
NCOA7	0.436498	0.0179912	0.032469
CCP110	0.160933	0.0273154	0.0468948
LONRF1	0.2904	0.00267279	0.00592044
MON1A	-0.274981	0.000333047	0.000898461
C2orf88	2.10172	2.84e-21	2.71e-19
LINC00663	0.243599	0.000199428	0.000563143
HMGXB3	-0.460848	6.43e-13	1.01e-11
ZSWIM3	-0.246351	0.000605131	0.00154558
ZNF804A	1.3008	1.93e-08	1.2e-07
FUT2	1.37938	4.88e-10	4.16e-09
GDF7	1.04382	2.52e-07	1.25e-06
FZD4	-0.415554	0.000816601	0.00202616
HIST1H1C	-0.43944	0.029324	0.0499199
CIDEB	0.806196	1.01e-10	9.98e-10
KCNJ11	-0.632475	7.04e-06	2.66e-05
AATBC	1.30423	6.07e-08	3.4e-07
MTX2	-0.182706	0.0123351	0.0231078
BRD3	-0.238932	0.00493593	0.010242
LYRM7	0.230679	0.00050502	0.00131262
AC013726.1	-1.55924	4.44e-18	2.1e-16
AC138409.2	-0.558754	0.000776375	0.00193679
LINC01354	0.819043	4.67e-07	2.21e-06
KRBA1	0.514839	0.000106727	0.000318195
SERPINA3	-1.5045	2.6e-05	8.85e-05
HOXB7	1.27547	2.56e-10	2.33e-09
SNORA73B	-1.90054	1.47e-16	5.17e-15
THUMPD3-AS1	-0.375466	6.47e-05	0.00020126
AL135905.2	-0.564132	4.54e-07	2.15e-06
IRF9	-0.412902	0.00487125	0.0101238
PABPC1L2B	-2.04475	8.96e-09	5.91e-08
ZNF57	0.167371	0.0077621	0.0153115
FBXL4	-0.204903	0.0123762	0.0231776
C9orf3	1.02797	3.71e-19	2.21e-17
CLEC9A	0.937795	3.33e-06	1.35e-05
AC018738.1	-0.375944	0.0234547	0.041004
PTDSS2	-0.205785	0.0118955	0.0223844
UGT8	1.20182	6.42e-07	2.95e-06
SLC25A23	0.160899	0.0167977	0.0305153
MAPK4	0.717573	0.000537196	0.00138784
POMGNT2	0.227313	0.000207597	0.000584328
HINT1	-0.24583	0.000652406	0.00165554
DYNLT3	0.370138	1.06e-06	4.66e-06
FKBP11	-0.576662	4.47e-06	1.76e-05
CCDC178	1.27657	1.42e-08	9.02e-08
AC005229.4	0.368241	8.43e-07	3.79e-06
NDP	1.5431	1.56e-09	1.2e-08
FLII	0.12497	0.0129744	0.0241997
RHOBTB1	0.724935	3.62e-05	0.000119614
SLC4A4	-1.47849	4.23e-09	2.97e-08
RPL38	-0.358897	0.000402509	0.00106803
RPS16	-0.298211	0.00166191	0.00386201
AP2A2	-0.199189	3.33e-05	0.000110737
ZBTB46	0.164256	0.0161922	0.0295553
ZNF214	0.312342	0.00972986	0.0187339
AC008735.2	-0.711848	0.000297889	0.000810259
TWIST1	-1.60042	8.45e-11	8.52e-10
ZNF682	-0.200647	0.0137247	0.0254779
RPL14	-0.358431	0.000120519	0.000355917
AC092123.2	-0.815674	1.71e-09	1.3e-08
AC008592.3	0.350669	0.0219548	0.0386975
ILF3-AS1	0.2774	0.00249479	0.00556788
PHKB	-0.266964	0.000695313	0.00175307
CCT6A	-0.24049	8.06e-05	0.000245897
FAM92A	0.631193	7.36e-14	1.42e-12
RBAK	-0.161793	0.0100856	0.019326
FKBP9P1	0.78253	1.19e-07	6.34e-07
LAPTM4B	0.932512	2.31e-11	2.6e-10
YIPF3	-0.283878	3.46e-06	1.39e-05
SYT4	1.08559	0.00847294	0.0165507
DIO3OS	0.524948	0.00485707	0.0101023
NR1D1	0.571325	6.04e-05	0.000189019
GPR75	0.754942	4.31e-06	1.7e-05
TMEM110	0.194138	0.00578436	0.0117797
APOC1	-1.48464	1.35e-11	1.6e-10
RNASE4	0.63585	0.000223129	0.000624707
NEK2	-1.26984	3.36e-09	2.41e-08
BAIAP2-AS1	-0.258786	9.18e-05	0.00027729
AC093620.1	-0.618157	1.6e-05	5.67e-05
RRAGB	0.378062	5.82e-07	2.7e-06
RPL23AP82	0.36771	3.99e-08	2.32e-07
HIST2H2BE	-0.575207	0.000162114	0.000467519
AP1S1	-0.280075	0.000641338	0.00162903
AC087491.1	-0.817173	4.27e-05	0.000138536
NCLN	-0.507688	4.14e-10	3.59e-09
AC003991.1	-1.87376	1.23e-13	2.24e-12
TMEM206	-0.452697	2.57e-07	1.28e-06
SMAD6	1.00201	7.36e-14	1.42e-12
ZNF17	0.13645	0.00499303	0.0103442
RPP38	-0.154236	0.0031792	0.00692426
AC008443.1	-0.254511	0.006502	0.0130692
VEGFB	0.377072	7.87e-05	0.000240649
RBMS1	0.745399	1.43e-10	1.37e-09
AP004608.1	-3.4136	1.51e-28	5.46e-26
HNRNPUL2-BSCL2	-0.631053	4.68e-05	0.000150428
DRG2	-0.119121	0.0138548	0.0256961
AC084880.1	1.44176	4.28e-14	8.67e-13
DNASE2B	-2.18537	7.8e-14	1.5e-12
SAFB	-0.187526	0.000137999	0.000402828
SRSF12	-0.420294	0.000562746	0.00144836
MAPK8IP1	-0.270586	0.0013536	0.0032062
RFX2	0.523547	3.47e-06	1.4e-05
TMED10P2	0.674345	9.24e-06	3.42e-05
ZADH2	-0.244304	0.000825878	0.00204581
FANCD2	-0.451385	1.9e-07	9.7e-07
ANKZF1	-0.559875	1.56e-10	1.48e-09
TRMT2A	-0.339203	2.29e-05	7.88e-05
MEF2C	0.687149	1.18e-05	4.3e-05
SENP5	0.109745	0.015977	0.0291972
CBFA2T3	-0.37228	0.00887642	0.0172511
LZTS2	0.31982	1.87e-06	7.91e-06
AC004687.1	-0.74085	0.00549503	0.0112614
PLXNA3	-0.489169	1.03e-08	6.7e-08
KCTD14	1.7306	4.81e-15	1.2e-13
SLC44A4	-1.0725	9.59e-21	8.25e-19
MMS19	-0.173512	0.000811428	0.00201414
GMPR2	0.147365	0.000191893	0.000543697
TBC1D19	0.287156	8e-07	3.61e-06
CHPT1	0.391619	1.71e-05	6.01e-05
ERGIC1	-0.98489	3.52e-29	1.41e-26
AC000089.1	-0.537689	0.00010528	0.000314185
KDM4A-AS1	-0.552971	1.39e-06	6.01e-06
ERBB4	0.857783	0.000185315	0.000526516
TSPAN32	0.534356	0.000345083	0.000927671
LPP	0.628875	3.63e-09	2.59e-08
ZNF485	-0.767846	9.79e-21	8.39e-19
HIVEP1	-0.332914	0.00446348	0.00937678
DFFB	-0.368416	1.26e-07	6.69e-07
EIF4EBP2	0.533693	1.24e-18	6.69e-17
AC006480.2	-0.510604	0.000795999	0.00198091
ANKRD34B	-2.82514	5.32e-07	2.48e-06
THEM6	-0.345529	0.000924136	0.00226553
HSPB6	1.32934	1.07e-08	6.94e-08
COX5A	-0.34161	3.29e-05	0.000109811
EIF6	0.179422	0.0116451	0.0219535
AIFM1	-0.403135	6.08e-10	5.08e-09
WWC2	0.462837	0.000127238	0.00037408
MPPED2	0.467602	0.00846743	0.0165417
MEF2C-AS1	1.09323	1.34e-09	1.05e-08
CHRDL1	1.51311	8.2e-10	6.64e-09
TRAF3IP2	0.765932	1.77e-11	2.03e-10
EPB41L4A	0.390748	0.02584	0.0446879
TAF4B	-0.640861	8.83e-09	5.83e-08
DOC2GP	-0.592327	0.0155739	0.0285255
GAL3ST3	1.12112	6.77e-06	2.57e-05
APOBEC3D	1.35168	2.48e-13	4.26e-12
MALT1	-0.404163	0.0015416	0.00360893
ARVCF	-0.685541	3.05e-14	6.42e-13
FBXO16	0.238331	0.0113898	0.0215432
KIF7	0.591423	1.64e-05	5.77e-05
ZNF85	-0.347288	2.2e-06	9.14e-06
ITIH5	1.07022	2.2e-10	2.03e-09
CCDC110	-1.20401	1.97e-18	1.01e-16
AC245060.6	-0.585973	0.000159352	0.00045984
AC036176.1	0.402331	0.000270102	0.000741574
CLGN	-0.932979	5.96e-07	2.75e-06
SLC25A37	-0.579208	2.14e-10	1.98e-09
TFDP2	0.19098	0.000685349	0.00172961
FAM109A	-0.473256	1.07e-11	1.29e-10
CCDC12	0.180095	0.0251773	0.0437059
FAM234B	-0.928525	1.71e-11	1.97e-10
CHMP4BP1	-0.410323	0.0181315	0.0326838
LINC01816	-0.337864	0.0165316	0.0300823
UCN	-1.36273	4.11e-15	1.04e-13
ZNF764	-0.221374	5.53e-05	0.000174947
DEPDC7	1.15733	1.04e-08	6.76e-08
AC015921.1	-1.40353	8.85e-12	1.09e-10
FHL3	0.477566	5.82e-05	0.000183308
MMRN2	0.389941	0.0015826	0.00369494
RAD51B	0.611874	1.57e-09	1.21e-08
NDST1	-0.238691	0.00214343	0.00486084
AC018645.2	0.407243	0.000213014	0.000598479
EHMT2-AS1	-1.48911	4.54e-16	1.43e-14
IRF2BP2	0.165642	0.0219438	0.038682
ZNF230	0.211263	2.16e-05	7.47e-05
RNF41	-0.443963	3.46e-07	1.67e-06
AC020915.1	-0.311535	1.74e-06	7.37e-06
MSN	0.711399	3.12e-08	1.86e-07
SLC9A5	-0.379454	0.00621074	0.0125509
SMARCD1	-0.145311	0.000564832	0.0014535
NPM1P25	-0.298834	0.011625	0.0219246
STRADB	-0.638422	8.26e-12	1.03e-10
DDOST	-0.330013	9.44e-07	4.2e-06
HSPB1P1	1.42545	5.82e-12	7.46e-11
KCNIP3	1.24978	3.39e-15	8.76e-14
SFPQ	-0.347588	3.7e-12	4.94e-11
TIGD6	-0.315778	3.08e-05	0.000103411
AC090616.7	-0.29422	0.0130814	0.0243745
NGRN	0.224638	4.3e-05	0.000139384
RGS16	0.892272	0.0001753	0.00050142
AL122023.1	-0.41185	0.000183368	0.000521547
AC006942.1	0.429007	0.0100232	0.0192164
AL020996.1	-0.181743	0.0293673	0.0499844
BCO2	0.640957	7.81e-06	2.93e-05
NOS1	1.33883	7.89e-06	2.96e-05
CA14	2.21061	1.1e-21	1.15e-19
BMPR1A	0.378354	1.11e-07	5.97e-07
ABCG1	-0.821954	2.91e-14	6.15e-13
ACACA	-0.769687	1.1e-12	1.65e-11
MOB3C	0.524564	1.28e-11	1.52e-10
LRTOMT	-0.621716	5.34e-19	3.06e-17
ARL11	0.541388	0.000390677	0.00103902
TMEM127	0.294348	3.54e-10	3.11e-09
DUXAP8	-1.03103	9.26e-05	0.000279354
CD55	0.920793	1.31e-09	1.03e-08
PLN	1.10406	8.49e-08	4.64e-07
LYPLA1	-0.75057	3.56e-11	3.86e-10
FBXO27	0.759324	5.69e-05	0.000179423
SYNGR3	0.775828	0.000399411	0.00106026
EML1	0.212653	0.0189482	0.0339998
NUP93	-0.411091	7.06e-06	2.67e-05
SMAD3	0.458236	2.64e-09	1.94e-08
LINC01451	1.26656	1.25e-06	5.42e-06
YARS2	-0.15235	0.00369615	0.00792283
ZCCHC4	0.202293	7.98e-05	0.000243757
MRVI1	1.10325	5.17e-09	3.58e-08
FAHD2CP	0.494999	0.000277067	0.000758322
ZNF581	-0.42142	9.42e-05	0.000283667
ALMS1-IT1	-0.614949	4.06e-05	0.000132529
CCDC39	-0.376209	0.00561269	0.0114757
DDX27	-0.151761	0.00036554	0.000977673
PLP2	1.34044	2.4e-23	3.42e-21
COQ7	-0.229866	1.02e-05	3.75e-05
OXCT1-AS1	0.513028	1.11e-06	4.85e-06
RERG	0.960793	2.67e-11	2.97e-10
NEDD4	0.263849	0.0232741	0.040723
THAP11	0.325709	4.85e-08	2.77e-07
ZNF43	-0.262933	0.000422749	0.00111595
MRPL19	-0.170504	0.00741124	0.0146823
AF131216.3	0.848476	0.000193535	0.000547844
SPATA17	-0.25099	0.0272114	0.0467511
AL031282.1	-0.717246	2.14e-05	7.41e-05
SKP1	0.237367	1.25e-05	4.51e-05
PEX14	0.586764	6.07e-20	4.17e-18
PAFAH1B1	0.246706	2.12e-06	8.85e-06
OSTF1	0.24659	5.68e-06	2.19e-05
FBLIM1	0.765091	3.77e-16	1.21e-14
ZNF321P	-0.360718	0.000406949	0.00107848
AL645608.1	0.86509	8.32e-05	0.000253041
TMIGD3	0.598667	0.000176832	0.000505296
LGALS8-AS1	-1.23952	7.5e-11	7.64e-10
EZH2	-1.17004	1.58e-22	1.99e-20
RAP1GAP2	-0.986272	2.06e-12	2.9e-11
AL163636.2	0.819403	9.16e-05	0.000276761
PLEKHB1	-0.787808	7.39e-06	2.78e-05
ZFP37	0.374256	0.011688	0.0220243
AP001107.1	-0.607829	2.04e-08	1.25e-07
IGHV3-15	-0.874171	0.0221696	0.0390426
ARMC1	0.180714	0.00388989	0.00828896
ZNF154	1.43701	2.76e-18	1.36e-16
GOLGA2P5	-0.297333	0.0196016	0.0350459
PHKA2-AS1	-0.735885	0.00011221	0.000333141
AC018638.6	-0.794301	4.89e-06	1.91e-05
SPRN	-0.400583	0.00126435	0.00301634
PI4KA	-0.201778	0.00234193	0.00525472
POU2AF1	1.20502	1.98e-06	8.29e-06
AC004540.2	-0.753619	0.00960367	0.0185208
MRPL12	-0.48345	0.00102824	0.00249518
GNPDA1	0.231558	7.66e-05	0.000234888
RASAL1	1.65451	3.83e-10	3.35e-09
DDAH1	-0.732195	1.92e-15	5.23e-14
AC091544.2	-1.66158	1.57e-08	9.87e-08
AC007731.2	-0.91955	8.7e-07	3.9e-06
SLC35B2	-0.407539	2.96e-09	2.14e-08
PGAP2	0.181022	0.0166565	0.0302887
SAMD13	-0.726509	0.00026692	0.00073382
TIPARP	0.546716	9.7e-05	0.000291636
CHEK1	0.62175	2.33e-07	1.17e-06
ZNF8	-0.287274	1.78e-05	6.26e-05
CEBPB-AS1	0.500248	1.05e-07	5.62e-07
CKB	0.391391	0.00789676	0.0155455
IPO8	0.149607	0.0037485	0.00802291
PART1	-1.0101	7.7e-08	4.24e-07
MAP3K14	0.583611	1.88e-07	9.61e-07
MRAP2	1.00715	6.74e-10	5.56e-09
UBL7-AS1	-0.155455	0.0124932	0.0233779
NOVA2	0.342505	0.0120515	0.0226364
GOLPH3	-0.497285	6.3e-10	5.24e-09
AC003681.1	-0.639536	4.17e-07	1.99e-06
UBLCP1	0.170958	0.000308544	0.000837756
PIBF1	0.186678	0.00857295	0.0167212
TTLL1	-0.162112	0.0098737	0.0189771
NKRF	-0.225989	2.44e-05	8.35e-05
DUSP2	1.37861	1.23e-09	9.7e-09
TMEM35B	0.499293	7.72e-09	5.16e-08
KIF18B	-1.19327	1.02e-08	6.64e-08
PIK3C3	0.191863	0.000280051	0.000765467
NEFM	1.5517	8.1e-06	3.03e-05
TNNC2	1.19346	1.59e-06	6.79e-06
ANKRD28	-0.207374	0.000484675	0.00126402
SYN1	0.598734	9.8e-05	0.000294487
RAB14	0.139665	0.00414616	0.00878021
GRK3	-0.541864	7.62e-07	3.45e-06
RIPPLY3	-0.408621	0.0142369	0.0263173
CXCR2	2.32354	3.76e-17	1.48e-15
C1orf123	0.240946	9.56e-05	0.000287588
B4GALT1	0.196396	0.0268742	0.0462709
EMBP1	-1.10461	0.000306919	0.000833835
PP7080	0.217494	0.0224689	0.0395168
ESYT3	0.321554	0.0220552	0.0388634
CD40	1.31947	5.28e-16	1.63e-14
WHAMMP2	0.422951	0.000164134	0.000472676
EFCAB7	0.200101	0.001784	0.00411201
GDI1	-0.200045	0.000511666	0.00132784
ZNF81	0.237058	0.0167636	0.0304595
CCDC186	-0.308254	0.00233158	0.00523406
VSNL1	2.0126	7.43e-11	7.58e-10
GSAP	-0.358974	1.37e-05	4.93e-05
AC020571.1	-0.894991	0.000328992	0.000888954
RAET1G	0.811067	7.1e-08	3.93e-07
LRRC4	0.992984	4.84e-07	2.28e-06
CS	-0.268748	2.14e-07	1.08e-06
IGFBP7	0.578203	1.87e-05	6.55e-05
ZNF609	-0.17581	0.0130415	0.02431
MED10	0.153597	0.00768668	0.0151757
OR2W3	-1.03051	3.92e-05	0.000128259
EHMT2	-0.166084	0.00113183	0.00272397
STRIP2	0.440782	0.00960412	0.0185208
NDUFAF6	-0.388128	1.55e-06	6.63e-06
ECE2	-0.525013	2.74e-06	1.13e-05
GTPBP3	-0.365561	9.32e-09	6.14e-08
THAP8	0.21955	0.00085037	0.00210118
AL157756.1	-0.987548	7.47e-08	4.12e-07
ATG4B	-0.152096	0.0197188	0.0352316
SCD5	0.965459	6.79e-11	6.98e-10
MAL	2.09522	1.83e-15	5.01e-14
WDR5B	-0.283607	7.58e-05	0.000232798
AQP4	0.835836	2.19e-05	7.56e-05
GALR1	1.73866	1.19e-08	7.67e-08
FBRSL1	-0.347048	1.67e-07	8.63e-07
ARMC8	0.222249	1.04e-06	4.58e-06
SLC47A1	1.26863	3.07e-12	4.14e-11
DCUN1D3	0.196353	0.0228571	0.0400925
DMPK	0.904651	3.37e-12	4.51e-11
AC006213.6	-0.479995	1.33e-07	7e-07
CBR4	-0.337592	0.000420741	0.0011108
DHRS13	-0.45997	0.000141913	0.000413138
AL365203.3	0.472298	9.59e-06	3.54e-05
IDNK	0.341734	0.000121197	0.000357748
SMYD5	-0.124139	0.0173491	0.0314366
KRT7-AS	1.21284	0.000348274	0.000935568
RPS13	-0.249836	0.00308634	0.00673876
NPPA-AS1	-0.738753	0.000727761	0.00182788
LDAH	0.996602	4.53e-06	1.78e-05
SLC22A20	0.787498	6.99e-07	3.19e-06
FADS2	1.65794	5.95e-10	4.99e-09
ENAH	0.563506	2.56e-12	3.52e-11
LIPH	-0.75025	5.76e-07	2.67e-06
SYNE4	-0.807648	3.99e-14	8.18e-13
ATP2C1	-0.73704	8.44e-14	1.61e-12
RCC2	-0.516686	1.71e-11	1.97e-10
MAMSTR	1.00797	1.23e-15	3.46e-14
CROT	0.485211	1.11e-06	4.87e-06
PABPC3	-0.473795	0.000341949	0.000919783
AC009495.3	-0.986396	2.05e-09	1.54e-08
KHK	0.392358	0.000145389	0.000422257
ESRRG	-0.661884	0.000290619	0.000791418
SLC12A2	-0.968701	1.12e-10	1.1e-09
RDH5	0.708383	5.84e-06	2.25e-05
PTGFR	0.783753	0.0224349	0.0394645
AL354872.2	-0.584871	1.11e-05	4.05e-05
STOX2	1.32743	1.71e-14	3.8e-13
CDR2	0.220815	0.00361518	0.00777461
STPG3-AS1	-0.745498	0.000452698	0.00118667
NLGN2	0.32813	0.000225335	0.000630404
EXOSC9	-0.176287	0.000615144	0.00156898
ZNF566	-0.270537	8.13e-06	3.04e-05
CTAGE7P	-0.731568	0.000178916	0.000510302
PDRG1	0.271703	0.00021522	0.000604031
TMEM252	1.61093	5.45e-08	3.09e-07
MSI1	-0.96655	2.74e-16	9.06e-15
CC2D1A	0.146862	0.0171312	0.0310815
AC106028.3	-0.929717	4.49e-12	5.89e-11
STRADA	0.179608	0.00362303	0.00778693
PLAGL1	0.412116	0.0043242	0.00911117
AC098934.2	-0.883914	8.57e-11	8.63e-10
AC002128.1	-0.84802	5.56e-07	2.59e-06
KLF6	0.357683	0.0256949	0.0444774
USP54	-0.619882	7.11e-08	3.94e-07
THBD	0.410639	0.0205638	0.0365147
ITGB7	0.544877	0.00706292	0.0140663
ABCD2	0.943904	4.86e-06	1.9e-05
DNAJC7	-0.19924	0.000142741	0.000415354
AC092171.4	-0.858263	3.96e-05	0.000129694
CCDC81	0.713518	1.07e-08	6.96e-08
NFYC-AS1	-0.282661	0.020303	0.0361223
AC010326.3	-0.617115	2.91e-15	7.64e-14
SCUBE1	1.23404	3.91e-11	4.2e-10
SMIM8	0.162914	0.0251781	0.0437059
AC010186.3	0.433954	5.09e-05	0.000162352
ARPC5	0.182589	0.000675785	0.00170875
SV2B	1.31088	2.03e-06	8.52e-06
ZDHHC4	0.217536	0.00258346	0.00574352
ADGRL1	0.507431	0.000378253	0.00100889
VPS9D1-AS1	-1.92565	8.69e-30	3.81e-27
MAP10	0.477297	0.0084824	0.0165657
ANKRD42	0.262246	2.99e-06	1.22e-05
PPM1M	0.584092	9.63e-14	1.81e-12
AC007292.1	-0.315902	0.0120956	0.0227006
LINC00894	-0.514618	0.00657483	0.0131955
GP6	-0.38403	0.0191614	0.0343589
CRYBA2	-1.21353	1.02e-07	5.51e-07
LEF1	-0.66034	0.000459806	0.00120445
TLNRD1	-0.238739	0.00413931	0.00876773
PEAK1	1.03883	1.94e-11	2.21e-10
KCNQ1OT1	-0.341304	0.0109988	0.0208997
EYA1	0.635537	0.0048057	0.0100067
MAPK14	0.371865	4.49e-11	4.76e-10
AL354892.2	-0.536434	1.26e-10	1.22e-09
GTF2F2	0.194133	0.00448371	0.00941604
AP001626.1	-0.625512	0.00207374	0.00471613
PLA1A	-1.19198	7.31e-06	2.76e-05
NHP2	-0.285211	9.98e-05	0.000299475
SATB2	-0.476543	6.79e-06	2.58e-05
CLCN2	-0.386373	1.88e-06	7.94e-06
HOXA10-AS	-0.667356	1.48e-06	6.34e-06
EMID1	0.533437	0.00192667	0.00441327
SLC25A13	-0.209832	0.00907607	0.0175909
AP003356.1	0.455198	0.00107998	0.00261077
COL6A2	0.585463	7.31e-05	0.000225048
TMEM132C	1.75958	2.44e-10	2.23e-09
TMEM47	1.02867	8.59e-13	1.32e-11
PPHLN1	0.0877783	0.0157932	0.028887
AC122688.3	-0.718692	3.09e-07	1.51e-06
AC136475.3	0.755337	0.00318582	0.00693542
MAP3K8	0.726904	7.9e-06	2.96e-05
AKAP10	0.189255	7.76e-05	0.000237586
NCCRP1	1.60834	1.49e-09	1.15e-08
KLHDC8B	0.363826	2.63e-05	8.94e-05
EFCAB14	0.220522	0.000211056	0.000593338
FMC1	-0.304324	0.00467975	0.00976432
STOM	0.928853	1.07e-11	1.29e-10
PLEKHA3	0.176589	0.00109513	0.00264496
TMEM14A	0.173284	0.0114064	0.021572
AC011497.2	0.552882	0.000211832	0.000595339
AC108860.2	-0.751887	6.82e-09	4.61e-08
TCP11L1	0.203639	0.0121398	0.0227767
MYH3	1.12626	5.51e-05	0.000174323
FTH1P23	0.344081	0.00333517	0.00722726
GPKOW	0.145741	0.00312964	0.00682764
SPON1	1.26501	6.83e-10	5.63e-09
ROCK1P1	-0.387527	0.00158751	0.003705
RAB23	0.582508	0.000106152	0.000316584
ARPP19	0.294157	2.41e-08	1.46e-07
MIR100HG	1.07977	6.52e-10	5.4e-09
ZNF516	1.1126	7.62e-11	7.75e-10
GGPS1	-0.154531	0.0125339	0.0234468
ST20-AS1	-0.332241	0.00115256	0.00276952
MAP2K2	-0.193812	0.0175555	0.0317636
AC090517.2	-0.620276	9.61e-07	4.27e-06
SAMD8	0.313099	4.73e-06	1.85e-05
MPI	-0.42737	3.08e-09	2.23e-08
AC027228.2	-1.13491	4.13e-08	2.4e-07
ABCC3	1.07959	9.71e-07	4.31e-06
RRAGA	0.289117	3.71e-09	2.64e-08
AC012213.1	-1.67729	1.65e-08	1.03e-07
CARS2	-0.176988	0.0161773	0.0295339
ANGEL1	-0.26635	1.05e-05	3.87e-05
LDHA	-0.393741	2.31e-05	7.96e-05
EDNRB	1.19379	1.87e-08	1.16e-07
FAM167A	1.92029	2.22e-14	4.8e-13
FAM229B	0.670085	2.3e-11	2.59e-10
ATP5S	0.0908752	0.0241922	0.0421773
PHF19	0.687073	1.05e-15	3.04e-14
XKR5	1.03263	9.2e-07	4.11e-06
ZNF518A	-0.211783	0.0099423	0.019093
SPDYE3	-0.127631	0.0289789	0.0494008
AL132657.1	-0.442544	0.000141958	0.000413206
PPP2R5C	0.28392	6.92e-11	7.1e-10
CAPG	1.54121	8.99e-21	7.81e-19
TPCN2	0.143888	0.0249304	0.0433248
MBD4	0.136112	0.00235028	0.00527153
ATN1	0.145523	0.0134266	0.0249697
AC008610.1	-0.476841	0.00762464	0.0150629
MPZL1	-0.291016	7.04e-08	3.9e-07
LINC01091	0.504456	0.00913507	0.017694
ZSCAN29	-0.140915	0.0284653	0.0486243
SPIN4	-0.811699	2.51e-10	2.29e-09
FAR2P1	-1.77503	4.43e-07	2.1e-06
ZNF296	0.835655	3.21e-07	1.56e-06
INPP1	0.928481	7.19e-11	7.36e-10
DENND4A	-0.168757	0.00507875	0.0104958
PCNX4	-0.251598	0.00337892	0.0073126
EIF5A2	0.516416	0.00012924	0.000379785
SPATA41	0.727096	2.36e-08	1.44e-07
SEZ6L2	-0.997328	2.42e-10	2.21e-09
GUCY2D	-0.69625	0.00407156	0.0086431
VPS11	0.206204	1.94e-05	6.78e-05
PLD5	1.15835	5.69e-05	0.000179456
GATD1	-0.29423	4.06e-06	1.61e-05
FBXO5	-0.212627	0.00427629	0.00902363
OXR1	0.69173	9.55e-14	1.8e-12
TGM3	-3.14873	8.95e-26	2.04e-23
MTCH1	0.261935	1.62e-07	8.38e-07
FBXW9	-0.521453	5.98e-08	3.36e-07
HK1	0.189626	0.00183469	0.00421672
SLIRP	-0.354679	0.000273429	0.000749367
CDC26	0.283056	1.63e-05	5.75e-05
AC010615.2	-0.723885	6.02e-07	2.78e-06
MRPL35	0.223402	1.29e-06	5.6e-06
AL513534.1	-0.393269	0.000479412	0.00125172
LAMTOR5-AS1	-0.433566	1.53e-07	7.94e-07
PRR15L	-0.564132	1.77e-06	7.51e-06
PYCR1	-1.46591	3.29e-33	2.89e-30
AC011978.2	-0.281809	0.00552757	0.011318
ZNF497	-0.299335	0.00103256	0.00250532
AC004947.2	-1.4311	6.92e-08	3.84e-07
AC107068.1	-0.231483	0.00691894	0.0138109
C12orf60	-0.584816	0.000511792	0.00132798
AP003108.5	-1.90186	2.24e-12	3.13e-11
C5orf34	0.977798	1.61e-19	1.04e-17
KLF12	0.532878	0.000164548	0.00047372
ARHGEF18	0.184782	0.0216375	0.0381894
ITM2C	0.431599	0.00139769	0.0033034
SCAMP5	-0.385669	0.00421286	0.00890306
AC243960.3	-0.475056	0.020444	0.0363406
CENPA	-1.53134	6.83e-13	1.07e-11
MCAM	1.0173	2.8e-10	2.52e-09
POLR3E	-0.467186	7e-17	2.61e-15
AC003973.3	0.83396	0.000430575	0.00113401
AC020910.5	-0.195829	0.0180485	0.0325628
AC025181.2	-0.424545	7.16e-08	3.96e-07
CDCA7	0.45374	0.0177013	0.0320054
MINDY3	-0.182806	0.00718174	0.0142767
THG1L	0.192892	0.00296873	0.0065072
GRHL3	0.985207	4.91e-07	2.31e-06
C14orf166	-0.162925	0.00312788	0.0068246
DUX4L50	1.71125	9.68e-18	4.35e-16
PPIB	-0.528806	3.98e-08	2.32e-07
RPL13AP5	-0.410007	0.00229595	0.00516729
KLHL4	1.64443	1.07e-12	1.6e-11
DENND5B	0.309977	0.0104598	0.0199724
GOLGA5	-0.246425	0.000187463	0.000532208
OVOL2	-0.221371	0.00923421	0.0178673
C10orf95	-1.07236	7.47e-15	1.78e-13
LCA5	0.841138	3.29e-13	5.51e-12
TOM1	-0.19479	0.00786326	0.0154895
SNHG7	-0.53292	6.59e-05	0.000204737
PTX3	0.636037	0.00603951	0.0122492
CENPN	-1.44366	4.98e-14	9.91e-13
MRPL50	-0.181061	0.00134044	0.00317827
TMED2	-0.235034	0.000542854	0.00140088
SCGB3A1	2.85028	1.1e-15	3.14e-14
ATG13	-0.116718	0.025686	0.0444703
CENPC	0.221074	6.83e-05	0.000211601
PPP1R26	-0.197867	0.00559884	0.01145
SGMS1	-0.253061	0.00236255	0.00529777
AP002800.1	1.7304	2.46e-10	2.25e-09
CREBZF	-0.285953	3.99e-05	0.000130608
NSUN5P1	-0.662506	2.39e-05	8.19e-05
GCHFR	0.508691	6.75e-05	0.000209285
PPP1R12C	0.468467	1.23e-08	7.85e-08
GRAMD4	0.342297	0.0223633	0.0393536
TTC7A	0.354206	2.76e-07	1.36e-06
S100A1	0.52653	0.00827719	0.0162147
MRPS26	-0.230271	0.00911194	0.0176548
RPL6	-0.348813	3.55e-05	0.000117509
DNAJB6	0.427084	2.27e-14	4.9e-13
NAGS	1.21425	7.05e-21	6.27e-19
ELP3	0.588074	1.66e-14	3.71e-13
AC109460.2	-0.579906	0.00257177	0.00572029
AC139887.2	-0.424903	3.66e-05	0.000120623
GPAT2	0.888381	7.07e-05	0.000218022
MIGA1	-0.318472	0.000641335	0.00162903
AC115223.1	-0.449794	4.2e-06	1.66e-05
NPIPB3	-0.526017	0.00361664	0.00777683
SLC35C2	-0.276571	9.34e-07	4.17e-06
MT1X	0.533579	0.00814614	0.0159801
AL391832.2	-0.552359	0.00565208	0.0115396
BCL2L13	-0.132824	0.00808549	0.0158713
ABLIM2	-0.493917	0.000328157	0.000886828
AC003965.1	-0.500739	0.000970578	0.00236841
GNB2	-0.509155	1.47e-08	9.28e-08
JAZF1	1.1627	1.69e-14	3.75e-13
CCDC30	0.236031	0.000850848	0.00210208
TMEM63B	-0.305832	9.05e-07	4.05e-06
C7	0.615459	0.013987	0.02591
S100A8	0.841497	0.000680189	0.00171847
KAT2A	-0.677494	2.33e-12	3.24e-11
GLYCTK	-0.440272	5.84e-05	0.000183702
ARFIP2	-0.614903	2.39e-15	6.36e-14
CPQ	0.643992	2.38e-09	1.76e-08
HOXA7	1.18827	6.26e-10	5.21e-09
POLQ	-0.630054	0.000513186	0.00133122
PYM1	-0.270397	0.000778294	0.00194131
SPAG4	0.510058	0.000235197	0.000654517
SOAT1	-0.630356	2.61e-10	2.37e-09
MR1	1.04671	1.36e-13	2.45e-12
SLITRK6	1.63806	3.83e-13	6.33e-12
LIX1	1.72114	2.33e-06	9.65e-06
TNFRSF12A	0.543344	0.00465901	0.00973206
AL391244.2	0.61783	2.36e-05	8.09e-05
ORAOV1	-0.144975	0.0170616	0.0309674
AC011487.4	-1.66892	1.87e-07	9.57e-07
IFRD1	-0.212873	0.0215861	0.038106
ADAM21	-1.98293	6.39e-14	1.25e-12
GDPD1	-1.12725	1.74e-14	3.84e-13
KCTD9	0.530696	2.77e-09	2.02e-08
AC093525.8	-0.521065	0.00587647	0.0119461
PRRT3	-0.500938	1.65e-05	5.83e-05
PABPC4L	0.750234	1.42e-06	6.11e-06
FBXL19	-0.233896	0.000634971	0.00161369
ACTN2	1.50933	0.000800166	0.0019894
TXNIP	0.578833	1.21e-07	6.45e-07
ATG9B	-1.05523	3.83e-10	3.35e-09
SKA1	-1.0846	1.74e-10	1.63e-09
SLC9B2	0.395071	0.00806277	0.0158334
NUDT3	0.354867	6.5e-05	0.000202126
AC135048.4	-0.83239	1.87e-08	1.16e-07
HLA-F-AS1	0.862989	2.58e-09	1.9e-08
KLK15	-2.2322	1.5e-16	5.24e-15
RAP2B	0.407745	5.68e-06	2.19e-05
CHAD	1.2365	1.23e-07	6.55e-07
HEBP2	-0.499865	5.55e-08	3.14e-07
SCGB2B2	-0.350891	0.00486082	0.0101078
ZNF260	-0.250654	0.000109103	0.000324701
TLR3	1.01856	5.67e-10	4.77e-09
CAMK2G	0.768131	3.3e-22	3.9e-20
SRSF8	-0.190995	0.000354514	0.000951082
HMGB2	0.296965	0.00166819	0.00387464
AC078846.1	-0.37195	6.99e-05	0.000215921
FGF14	0.832621	4.67e-05	0.000150051
POLB	-0.636769	2.5e-07	1.24e-06
KIF3B	-0.259953	3.42e-05	0.000113711
CSRNP3	1.44404	1.21e-13	2.22e-12
MTMR9	0.213986	0.0162293	0.0296083
CARMIL3	0.48928	0.00147015	0.00345606
TRIM58	-1.50901	3.73e-08	2.19e-07
HMGB1P6	0.397832	8.27e-07	3.72e-06
GLMP	-0.372532	0.000110228	0.000327678
NSDHL	0.414328	1.92e-09	1.45e-08
H1F0	-0.498305	1.35e-09	1.05e-08
POLR2D	-0.375147	9.41e-11	9.41e-10
TOR1B	-0.50836	7.8e-10	6.35e-09
AC069307.1	-0.752723	3.15e-06	1.28e-05
HNRNPC	-0.112618	0.0132018	0.0245915
TCEAL9	0.218183	0.0175362	0.0317319
TMEM100	1.14529	3.58e-07	1.73e-06
GAPT	0.529093	0.00365846	0.00785209
RNF165	1.27551	8.37e-09	5.57e-08
MVB12B	0.413453	4.81e-09	3.35e-08
ZBTB14	0.132876	0.00707198	0.0140813
TGDS	0.183981	0.00778557	0.0153545
AL157700.1	-0.792618	2.83e-07	1.39e-06
MIR4697HG	0.613731	0.000238693	0.000663343
SCLY	-0.377803	4.6e-05	0.000147997
CACNA2D3	1.01433	2.52e-09	1.86e-08
AC109322.1	-0.277869	0.020268	0.0360802
ENTPD5	-1.66967	5.03e-19	2.89e-17
ZNF461	0.242036	0.000217068	0.000608849
PDIA5	-1.07679	3.81e-23	5.29e-21
Z93930.3	-0.555541	2.03e-05	7.06e-05
AC011477.3	-0.586027	8.16e-11	8.24e-10
THAP2	0.211353	0.00228894	0.00515402
CLDN12	-0.28915	0.000895506	0.0022012
PRKCE	0.405653	7.82e-08	4.3e-07
DTD1	-0.271965	2.57e-05	8.76e-05
TUBE1	0.370637	6.51e-07	2.99e-06
CCDC149	-0.52777	1.61e-14	3.61e-13
SKA3	-1.35635	5.25e-15	1.3e-13
RGS2	0.769733	1e-05	3.69e-05
DDX19A	0.276264	5.95e-07	2.75e-06
PDPN	1.194	1.19e-11	1.43e-10
AL109918.1	-0.369581	0.0115714	0.0218392
P3H4	-0.344424	0.000738023	0.00185139
AC108673.2	-0.900787	4.9e-07	2.3e-06
TMA16	-0.243481	4.82e-05	0.000154384
MST1R	0.929295	7.18e-08	3.97e-07
PLCXD1	-0.339026	3.23e-05	0.000107908
GLIS1	1.44038	5.68e-10	4.78e-09
PHRF1	-0.207503	6.1e-05	0.000190754
AC015813.1	-0.688081	1.36e-06	5.86e-06
LIPM	-1.03191	1.35e-05	4.86e-05
AC009501.1	-0.932471	1.11e-06	4.85e-06
IVNS1ABP	0.362147	9.3e-07	4.15e-06
DUSP19	0.9741	8.74e-19	4.84e-17
BTBD3	0.166983	0.0193406	0.0346297
NDUFV3	-0.19858	0.00428127	0.00903105
ARMC3	-1.52738	2.15e-06	8.96e-06
PPP1R2	0.25721	5.86e-08	3.3e-07
FOSL2	0.387517	0.0027736	0.00611971
AC019205.3	-0.579953	0.000171651	0.000491637
TUBA4A	1.16708	2.35e-13	4.06e-12
RHPN1	-1.02786	6.02e-11	6.26e-10
ADGRD1	0.909551	5.11e-05	0.00016289
LANCL3	0.988446	1.63e-05	5.76e-05
EEF2	-0.67924	3.61e-17	1.43e-15
ZDHHC11	-1.04989	1.68e-07	8.66e-07
AC110285.7	-1.88019	9.61e-14	1.81e-12
RBM12	-0.185776	0.00168243	0.00390132
MOV10	-0.431667	8.16e-13	1.26e-11
LRIF1	-0.222526	0.00145115	0.00341618
H2AFJ	-0.739291	1.85e-05	6.48e-05
EDIL3	1.0601	4.18e-09	2.94e-08
TMEM150C	-0.659714	6.3e-08	3.52e-07
SNHG20	-0.744975	7.26e-16	2.17e-14
SERGEF	-0.420285	8.16e-05	0.000248738
KIF26A	0.675312	3.43e-05	0.00011377
PEX2	0.375949	2.75e-08	1.65e-07
SKAP1	0.899445	3.75e-07	1.81e-06
AC107294.2	0.302666	0.0257752	0.0445964
LINC01503	1.54486	4.88e-16	1.52e-14
GADD45G	-0.532681	0.00866526	0.0168798
LEAP2	-0.437422	0.00537265	0.0110364
PILRB	-0.752815	0.000227489	0.000635754
IFITM3	0.559264	3.81e-05	0.000125034
SLU7	0.135246	0.000959643	0.00234571
DSC3	1.31865	6.97e-06	2.64e-05
VPS37C	-0.590243	3.6e-17	1.43e-15
TBX4	1.61314	0.000149428	0.0004331
B3GNT3	1.6306	1.65e-06	7.01e-06
UBE2S	-0.40843	0.00025917	0.000714647
PCDH1	-0.478298	5.56e-06	2.15e-05
NIFK	-0.384589	8.75e-10	7.04e-09
UBR5-AS1	-0.472632	1.32e-07	6.98e-07
OCIAD2	-0.20915	0.0075683	0.0149677
CAPZA1	-0.123554	0.0196329	0.0350849
CDYL2	-0.659079	2.64e-08	1.59e-07
UVRAG	0.204021	0.000933598	0.00228629
PGRMC1	0.794428	5.4e-23	7.31e-21
CLDN5	0.653563	0.000272144	0.000746512
PTPRN2	-1.37471	4.35e-13	7.1e-12
MYOM2	0.570742	0.00829988	0.0162575
NCS1	1.03613	2.93e-15	7.68e-14
DUSP6	0.595044	2.84e-05	9.61e-05
ELP5	0.193352	0.00582517	0.0118575
ADGRB3	1.33372	4.01e-09	2.84e-08
TGFB3	0.920547	3.34e-06	1.35e-05
MSL3P1	-1.26792	4.23e-25	7.87e-23
NAP1L3	0.880003	3.01e-08	1.8e-07
C17orf58	-0.52728	2.89e-06	1.18e-05
AARSD1	-0.408052	6.23e-08	3.49e-07
DMKN	1.63705	6.98e-12	8.83e-11
ADAM33	0.851655	1.73e-05	6.08e-05
MAPK6	-0.415505	5.26e-05	0.000167242
ZNF491	-0.356145	5.89e-06	2.26e-05
LINC02001	0.180904	0.0218947	0.0386101
LGMN	-0.395591	4.88e-06	1.91e-05
MSH5	-1.03511	2.45e-11	2.74e-10
USP31	0.230439	0.00705008	0.0140453
UBE2R2	-0.28943	7.47e-10	6.12e-09
AC011472.2	-0.87511	1.44e-09	1.11e-08
FOXO4	0.390174	1.36e-07	7.16e-07
ID4	1.83286	5.93e-18	2.77e-16
CDH22	1.47466	3.53e-06	1.42e-05
SOX5	0.949535	2.15e-08	1.32e-07
AC004982.1	-1.44063	3.22e-13	5.42e-12
AC008555.8	-0.89992	1.05e-15	3.04e-14
FAM136A	-0.478912	5.67e-14	1.12e-12
PERM1	-0.431501	0.00515117	0.0106193
NFIX	-0.383321	3.47e-06	1.4e-05
RIN3	0.605548	8.96e-07	4.01e-06
CLEC14A	0.373215	0.0034616	0.00747485
PLA2G5	0.398715	0.00264803	0.00587149
YBEY	-0.504897	5.58e-07	2.6e-06
MED17	-0.112712	0.0276498	0.0473937
PSORS1C1	0.483695	0.00697417	0.0139106
AC008438.1	-0.591164	4.42e-10	3.81e-09
PNMA8B	1.02582	4.33e-10	3.75e-09
GJA3	-1.54604	2.52e-06	1.04e-05
RREB1	-0.237757	0.000860176	0.00212313
TMPRSS5	-0.398905	0.0131341	0.0244703
LINC01869	-0.845379	1.53e-06	6.55e-06
AC138904.1	-1.3817	6.46e-13	1.02e-11
ZSCAN2	-0.760206	2.86e-23	3.99e-21
C1GALT1C1L	0.785526	1.7e-05	5.99e-05
SLC35E4	0.407414	6.09e-06	2.33e-05
ZBTB1	-0.193573	0.00891954	0.0173257
AC013394.1	-0.421701	0.00279822	0.00617034
SRRM3	0.947277	3.06e-09	2.21e-08
AC092535.4	-2.69499	9.76e-15	2.27e-13
SPNS2	0.373932	0.00505595	0.0104557
GIMAP7	0.364466	0.0103177	0.0197276
AC124944.3	-0.797028	2.94e-06	1.2e-05
ATP6V1E2	-0.194856	0.0033449	0.00724578
HCN2	-0.895019	9.42e-07	4.19e-06
UTP3	-0.247854	1.38e-06	5.94e-06
AC017100.1	-0.613519	3.09e-09	2.23e-08
LARGE1	1.00972	2.34e-18	1.18e-16
CKLF	0.230768	0.00737	0.0146147
PLEKHN1	-0.731309	4.32e-08	2.5e-07
RUSC1	-0.474785	5.31e-09	3.67e-08
MBNL1	0.525617	3.8e-12	5.05e-11
AL117339.4	-0.303147	0.0193367	0.034626
AL133243.2	0.234925	0.00628154	0.0126689
ATAD3C	1.65096	6.33e-18	2.95e-16
SERPINB1	1.25746	6.49e-14	1.26e-12
SLC1A1	-0.443278	0.0143973	0.0265765
HPN-AS1	-2.78499	1.62e-33	1.49e-30
AP001267.3	-0.693698	1.59e-06	6.76e-06
PSAT1	-0.794538	1.13e-08	7.26e-08
GDPD3	0.521089	0.000628449	0.00159849
AC087499.1	1.23626	5.15e-10	4.37e-09
ZNF226	-0.138547	0.0117117	0.0220656
PAFAH2	-0.168331	0.0162777	0.0296819
PUS7	-0.491994	1.64e-08	1.03e-07
CCDC82	0.751662	2.82e-14	5.99e-13
TUBB6	0.842806	6.36e-10	5.28e-09
AC097468.3	-0.527816	3.72e-07	1.79e-06
FOXL2	-1.91426	3.31e-07	1.61e-06
FDXACB1	-0.197808	0.0203688	0.0362208
RNF144B	-0.396871	0.00119123	0.00285573
2019-03-09	-0.247358	0.000166203	0.000478038
AC092164.1	-0.482984	0.00707974	0.0140937
FGF2	0.972356	5.42e-08	3.07e-07
ZSCAN25	0.226655	7.95e-05	0.000242985
PRODH	1.56981	1.77e-12	2.53e-11
GPR34	0.502389	0.00285571	0.0062836
SLC43A1	-1.88118	1.21e-23	1.84e-21
FTH1P20	0.399596	0.00480853	0.0100104
NTN1	0.789703	8.73e-05	0.000264582
AL513497.1	-1.00157	4.85e-13	7.84e-12
AP001258.1	-0.849937	3.8e-11	4.09e-10
STKLD1	-0.26091	0.00539591	0.0110767
DIAPH1	-0.364439	2.78e-06	1.14e-05
ZNF71	0.11762	0.0147753	0.0271737
TRAF4	-0.826837	2.64e-18	1.31e-16
RRM2	-1.57875	1.35e-14	3.05e-13
OS9	-0.147995	0.023193	0.0406081
C19orf12	0.13494	0.00428351	0.0090337
COPS8	0.160961	0.000255884	0.000706538
NCBP2	-0.185143	0.000383679	0.00102203
HNRNPAB	-0.35021	3.85e-08	2.25e-07
GPSM3	0.584568	1.88e-05	6.58e-05
ADGRL3	1.46978	4.05e-10	3.52e-09
SIL1	-0.211853	0.0288106	0.0491594
LDB2	0.479146	0.000613308	0.00156473
MYRFL	-0.62529	0.00431408	0.00909194
UNC93A	-1.21627	2.87e-06	1.18e-05
EFEMP2	1.26043	4.68e-16	1.47e-14
AC010976.1	-0.640512	7.46e-05	0.000229248
AC104532.2	-0.684073	2.01e-05	6.99e-05
AP002387.1	-0.378206	0.0101201	0.019386
C21orf62	1.30441	4.8e-07	2.26e-06
PCM1	0.310506	1.23e-05	4.44e-05
TSG101	-0.148818	0.000770031	0.001922
NOB1	-0.337886	3.05e-05	0.000102539
FMO5	-1.16256	1.67e-08	1.04e-07
GTF3C4	-0.203014	0.000894605	0.00219928
ABHD3	-0.337013	0.000322588	0.000872673
FAM69A	0.293272	0.0075753	0.0149778
IQSEC1	-0.303931	2.11e-08	1.29e-07
PIGN	-0.24955	0.00434861	0.00915632
SHISA9	1.15454	0.00736954	0.0146147
PLBD1	1.40255	1.64e-20	1.3e-18
PANO1	-0.641326	2.92e-08	1.75e-07
THNSL1	-0.252394	0.0282057	0.0482435
AC104825.2	-0.357677	0.00367802	0.00788672
JAM2	0.488365	0.000263408	0.00072514
ALX4	-1.46933	3.49e-05	0.000115671
AC107956.1	-1.09926	2.01e-08	1.24e-07
LINC02021	0.596166	5.44e-05	0.000172319
GCFC2	-0.431209	1.38e-09	1.07e-08
CORIN	0.507888	0.0206289	0.0366127
COQ8A	-0.250078	0.00332891	0.00721708
PLEKHG6	0.43997	0.00202298	0.00461436
AC083964.1	0.398577	0.00254892	0.00567563
SNHG17	-0.593639	1.93e-07	9.82e-07
SMG5	-0.311519	8.82e-08	4.81e-07
PCDHB16	-0.98094	9.2e-05	0.000277842
VWA7	0.834425	4.29e-07	2.05e-06
SLC25A6	-0.568356	2.27e-08	1.39e-07
WNT2B	0.959489	3.58e-08	2.11e-07
MRPL49	0.207676	3.96e-05	0.000129584
ASNS	-0.38643	1.1e-05	4.03e-05
AC136475.1	0.803278	1.44e-05	5.14e-05
RPL18	-0.251684	0.0193564	0.0346545
EXTL3-AS1	-0.478254	0.00687936	0.0137378
NHLRC4	0.88614	3.64e-08	2.14e-07
POLR1D	-0.141902	0.0184142	0.0331513
CPHL1P	-1.25576	6.31e-06	2.41e-05
GIN1	0.246337	0.000923986	0.00226546
CDKN2AIP	0.398164	2.42e-14	5.2e-13
C1D	0.15109	0.0182258	0.0328403
CXCL1	0.833604	0.0120038	0.0225583
SNHG8	-0.771968	4.03e-10	3.5e-09
AC002064.2	-0.720303	0.0149723	0.0275057
PAK5	1.8983	9.61e-12	1.17e-10
PDZRN4	1.31504	1.14e-09	9.01e-09
NIT1	0.206425	5e-05	0.000159737
OR51E1	-1.62836	4.83e-05	0.000154629
DNTTIP1	0.226269	4.04e-05	0.000131846
PAX8	0.837406	0.0085945	0.0167579
TMEM116	0.622719	1.41e-13	2.53e-12
FO538757.1	0.298653	0.0122492	0.0229561
BEX1	1.68788	1.9e-08	1.18e-07
NR2F1-AS1	0.428764	0.0017967	0.00413819
SLC2A4	1.02088	6.64e-06	2.52e-05
PKMYT1	-0.939287	2.84e-08	1.7e-07
LRRC59	-0.30111	8.13e-06	3.04e-05
ALKAL2	0.572765	0.00842354	0.0164647
LARP1B	-0.391787	3.52e-07	1.7e-06
LYL1	0.6058	7.67e-06	2.88e-05
EDEM1	-0.302911	4.51e-05	0.00014559
SLC25A19	-0.313479	8.37e-05	0.000254408
ZNF34	0.614233	8.88e-16	2.61e-14
AQP4-AS1	-0.641684	0.000239168	0.000664463
PANX2	-0.346599	0.00864601	0.0168441
ATXN2-AS	-0.864175	1.53e-08	9.61e-08
GSTM3	1.70675	4.05e-24	6.57e-22
C19orf54	-0.378465	2.76e-09	2.01e-08
SPRY3	0.527918	0.00101865	0.00247387
2019-03-06	-0.253793	1.16e-05	4.22e-05
SERAC1	0.197001	0.00509582	0.010524
ANAPC5	-0.390422	1.15e-10	1.13e-09
AC091982.4	0.369401	0.000836731	0.0020697
NOMO2	-0.356854	0.0148096	0.0272312
TNRC6C	-0.21605	0.000561256	0.00144513
RIT1	0.366805	9.12e-11	9.14e-10
AC009812.4	-1.01411	6.7e-15	1.61e-13
RHBDF2	0.244382	0.0123306	0.0231016
MED9	0.117326	0.022144	0.0390012
AP002495.1	0.278417	0.000144419	0.00041977
SLC12A9-AS1	-0.969432	5.08e-12	6.58e-11
CRYGS	-0.362078	0.0144815	0.0267026
AKT1S1	-0.330184	2.15e-07	1.08e-06
PHF14	-0.382802	2.96e-09	2.15e-08
NRIP3	0.755422	0.0012258	0.00293175
TMEM121	0.49744	0.00259332	0.00576195
DGCR6	0.303547	0.021095	0.0373142
WDR76	0.37364	0.00017955	0.000511951
SAP30BP	0.206757	0.00011725	0.000346987
GCNT4	2.00725	1.37e-26	3.54e-24
GPRASP1	1.00193	4.86e-11	5.11e-10
CXorf36	0.389392	0.00548923	0.0112528
BCDIN3D	-0.158675	0.00530513	0.0109086
CDKN1C	1.02865	4.93e-16	1.53e-14
ZFAND3	0.114376	0.0191779	0.0343818
AC141928.1	0.671258	0.00435091	0.00915908
RHBDL2	0.711901	1.16e-06	5.06e-06
C7orf43	-0.183555	0.00902738	0.0175057
HSPH1	0.338644	0.000367889	0.000983385
AQP1	0.570425	7.65e-05	0.000234509
KIAA1614	0.954851	2.59e-11	2.88e-10
FAM83F	0.345354	0.0283544	0.0484527
SNORD14A	-0.822601	1.21e-05	4.38e-05
LYNX1	0.784681	3.16e-09	2.28e-08
KIF13B	-0.276723	0.00685754	0.0136987
SLC39A3	-0.232582	0.00568572	0.0115929
PRSS16	1.29187	6.28e-06	2.4e-05
XG	1.44863	1.82e-08	1.13e-07
TXLNGY	-0.776994	1.36e-09	1.06e-08
SUGP2	-0.31514	1.59e-06	6.77e-06
AL137003.1	0.570412	0.000476093	0.00124411
RBM18	-0.262964	1.69e-05	5.94e-05
ZNF626	-0.295886	0.0114806	0.0216878
CEP126	0.926587	1.02e-09	8.13e-09
TUBG2	0.717208	3.56e-15	9.16e-14
LINC02289	-0.455747	0.0243858	0.0424746
TTYH1	0.359891	0.00843358	0.0164808
C3orf18	0.805331	1.67e-13	2.94e-12
ARHGEF33	0.48854	3.66e-05	0.000120549
AC010761.1	-0.862623	3.34e-10	2.95e-09
GBP3	0.536387	0.0207431	0.0367835
WDR5	-0.204061	0.000152198	0.000440437
RANBP10	-0.231864	0.000926934	0.00227209
RARG	1.15188	1.08e-16	3.85e-15
EEF1A1P13	0.320841	0.0275356	0.0472199
DENND1C	-0.584963	7.87e-13	1.22e-11
RBMS3	1.17006	1.72e-14	3.81e-13
FAAP100	-0.482436	2.42e-11	2.71e-10
TMEM128	0.176735	0.00170693	0.00395236
ILVBL	0.49701	3.61e-09	2.58e-08
AC112484.4	-0.606478	0.000739641	0.00185469
FAR2P4	-1.62265	1.1e-05	4.04e-05
CSNK1G3	-0.215846	0.000497176	0.0012937
NOL9	-0.156845	0.000396491	0.00105312
SLC29A2	-0.366814	0.000121289	0.000357905
TDRP	-0.39889	1.52e-05	5.39e-05
RNF219	0.383652	1.02e-09	8.12e-09
NHSL1	-0.626429	1.43e-06	6.15e-06
RBMX	-0.123748	0.00430627	0.00907754
MPP3	0.364229	0.00140466	0.00331817
AC005332.7	0.725204	9.09e-10	7.28e-09
FGL1	-2.48305	7.46e-10	6.11e-09
ARHGEF6	0.373734	0.00162938	0.00379694
TGFBR2	0.634461	3e-06	1.23e-05
LCN6	0.753773	0.000417357	0.00110282
IL33	0.889762	1.14e-07	6.11e-07
DEAF1	-0.525522	1.12e-09	8.83e-09
LINC01637	1.44408	3.21e-14	6.7e-13
AMN	1.21606	3.36e-07	1.63e-06
ZNF700	-0.195548	0.00513008	0.0105841
WWTR1	0.613813	2.46e-09	1.82e-08
PPP1R16B	0.493204	0.0144629	0.026671
COBL	-0.559306	4.81e-08	2.76e-07
ZNF680	-0.351582	0.018143	0.0326981
GAS7	0.644241	2.98e-05	0.000100513
TTC23L	0.320549	0.0108104	0.0205715
HAAO	1.32278	6.4e-13	1.01e-11
HLA-DRB1	0.403616	0.00680728	0.0136042
TLE6	0.78151	1.27e-07	6.72e-07
FOXN1	0.679451	0.00245208	0.00548252
RPL41	-0.244628	0.00221764	0.00501186
ABRAXAS1	0.250885	0.00212948	0.00483335
SLC38A1	0.358726	0.000762457	0.0019049
C10orf111	-0.85329	1.4e-09	1.08e-08
ZNF575	0.424662	1.16e-06	5.07e-06
ADAD2	1.43213	1.28e-10	1.24e-09
RPL10P19	-1.26554	4.25e-12	5.59e-11
KCTD7	0.179719	0.00809452	0.0158873
MCM3AP	-0.369557	7.75e-10	6.31e-09
RAB11A	-0.363595	2.74e-07	1.36e-06
AC005586.1	-0.68994	5.84e-06	2.25e-05
PLCD3	1.06877	2e-16	6.79e-15
PTBP2	0.495679	1.51e-11	1.76e-10
SNX1	0.139815	0.00559339	0.0114401
AP003486.1	0.209688	0.00414914	0.00878451
SOWAHC	0.470896	1.34e-09	1.04e-08
HOXB9	0.871159	0.00101203	0.00246005
SETD7	-0.339642	0.000118925	0.000351718
PARP3	0.944679	2.56e-21	2.48e-19
[truncated: 6,820 more rows]

## Sheet: Aggressive_sign_no_somatic_info
Supplementary Table S1B - A complete list of non-somatic mutated genes found to be significantly differentially expressed in aggressive tumors matched with controls.
Gene name	logFC	P.Value	adj.P.Val
PNCK	1.70297	1.6e-18	2.79e-17
C9orf152	-0.939935	8.91e-17	1.18e-15
CLMP	1.03677	7.21e-11	4.16e-10
AACS	-0.268607	0.000342325	0.000747893
CREB3L1	-0.713971	8.43e-08	3.16e-07
RPS11	-0.221156	0.0126437	0.0207923
AC126773.2	0.422093	0.0204394	0.0322508
PNMA1	1.0644	3.65e-17	5.14e-16
MMP2	0.79611	7.63e-07	2.51e-06
SLMAP	1.041	6.85e-31	1.25e-28
SAMD4A	0.786808	1.22e-08	5.16e-08
HAUS2	0.247965	1.14e-06	3.66e-06
FAM219A	-0.228344	0.000425394	0.000914228
SNORA42	-1.39933	5.23e-15	5.34e-14
TRAF3IP2-AS1	0.413139	1.65e-08	6.84e-08
BX324167.2	-1.99221	4.06e-20	9.03e-19
SMARCD3	1.05636	1.62e-16	2.06e-15
AP002884.3	1.59022	8.07e-23	3e-21
ERCC5	0.238257	0.000262353	0.000583611
ZHX3	-0.180709	0.0281333	0.0431997
BBOX1	0.981045	0.000241631	0.000540254
C10orf25	0.303315	0.000261718	0.00058234
EDN1	0.51827	0.00720627	0.012404
AP003559.1	-0.929676	2.25e-09	1.05e-08
PDCL3	-0.257439	2.51e-05	6.57e-05
CLK4	-0.170029	0.0233027	0.0363547
KCNG1	1.07666	8.93e-11	5.07e-10
PTPRR	-1.15622	9.41e-05	0.000224866
CADM4	0.204886	0.00866535	0.0147284
IRAK1	-0.643906	3.5e-16	4.22e-15
AL122010.1	-0.375394	8.4e-07	2.74e-06
RPS18	-0.38602	1.89e-05	5.05e-05
SLC10A7	-0.684164	4.15e-05	0.000104807
BRIX1	-0.253891	1.53e-05	4.14e-05
PXYLP1	0.311233	1.84e-05	4.92e-05
TMSB10	-0.50539	9.83e-05	0.000234214
AC232271.1	-0.716654	2.39e-07	8.41e-07
BOLA3-AS1	1.45043	1.09e-28	1.18e-26
TMC4	-0.471734	5.93e-08	2.27e-07
AC020978.5	-1.45784	5.97e-22	1.91e-20
CHRNA10	-0.404911	0.0027466	0.0051406
STYK1	-0.329317	0.00660139	0.0114592
NIFK-AS1	0.445288	4.13e-12	2.82e-11
RTN1	-1.02338	8.55e-09	3.7e-08
HIC2	-0.287096	0.000107692	0.000255068
AC016394.1	-0.663145	1.83e-08	7.52e-08
TBX10	-1.91509	1.43e-07	5.2e-07
CENPQ	0.245361	0.00014187	0.00033039
UTY	0.239315	0.00426502	0.00768813
ZBTB12	-0.232197	0.00591112	0.0103625
ATP5G2	-0.326812	1.07e-05	2.98e-05
REEP6	-0.354174	0.011973	0.01979
ERG	-1.6318	1.52e-05	4.13e-05
PRKAG2-AS1	-0.753276	3.87e-08	1.52e-07
AC105285.1	-0.990751	2.45e-19	4.85e-18
CYTH1	-0.198413	0.00331672	0.00611634
DIRAS1	-0.461219	5.54e-05	0.000137548
PNPT1	-0.326817	3.5e-08	1.39e-07
MIER1	0.379135	2.1e-08	8.57e-08
AC132872.4	-0.977279	3.8e-06	1.13e-05
AC008946.1	0.404298	0.000245435	0.000548094
AC005831.1	0.568268	0.0268938	0.0414692
AC005674.2	0.527721	0.00237965	0.00450319
SEMA4D	-0.115235	0.0298857	0.0456245
AGPAT1	0.315906	5.58e-08	2.15e-07
NOSTRIN	0.483346	0.00242883	0.00458544
INIP	-0.236148	8.66e-06	2.44e-05
AFDN-AS1	-0.839303	9.52e-11	5.39e-10
NINL	0.898092	2.03e-08	8.3e-08
MAP3K3	0.300168	3.91e-08	1.54e-07
MAX	0.277261	1.28e-11	8.12e-11
AC020558.2	-0.659661	1.17e-05	3.24e-05
NR4A2	0.790017	0.000601651	0.00126221
PIR	0.212278	0.0239784	0.0373488
LONP1	-0.287551	9.22e-06	2.59e-05
EVC	0.347102	0.00352198	0.00646767
CXCL13	2.26383	1.29e-08	5.43e-08
TMEM254-AS1	-0.26246	0.00344349	0.0063311
HERC2P2	-0.799746	1.14e-06	3.66e-06
C15orf41	1.46252	6.06e-32	1.43e-29
TCEANC2	0.221218	6.15e-05	0.000151287
SERPINF1	1.32046	2.89e-14	2.67e-13
HEIH	0.486845	2.71e-11	1.65e-10
DHRS11	-0.415618	4.51e-10	2.33e-09
AC026362.1	-0.809057	2.16e-11	1.34e-10
AL691482.3	-0.842273	0.00203447	0.00390087
ADNP-AS1	-0.235374	0.00258882	0.00487052
STK25	-0.162259	0.00121485	0.00242365
TAOK3	-0.246014	0.0288169	0.0441574
SLC12A4	0.886298	8.13e-16	9.28e-15
TMC3-AS1	-0.63376	2.24e-07	7.91e-07
SLK	0.200293	0.00173191	0.00336166
AC100803.3	-1.86768	6.56e-13	5.01e-12
ABCD4	-0.115133	0.0178403	0.0284494
HIST1H1PS1	-1.12837	2.92e-07	1.02e-06
FAAHP1	-0.796178	0.000140559	0.000327461
TERF2IP	0.180857	0.0019333	0.00372082
CPNE4	-0.87582	1.71e-10	9.32e-10
COL1A1	-0.769859	2.1e-05	5.56e-05
GRK5	0.779282	3.47e-12	2.4e-11
AP1S2	0.297279	0.000544979	0.00115144
TMEM52	-1.05462	9.28e-11	5.25e-10
CA11	1.27486	9.35e-18	1.45e-16
TMEM266	-0.674329	2.15e-06	6.61e-06
NUDT1	-0.285264	0.00600141	0.0105097
ACBD3	-0.188655	0.00678959	0.0117515
AC093797.1	-0.713208	0.000159102	0.000368334
GDPD5	-0.299221	0.0161754	0.0260445
PDCD4	0.227237	0.0101497	0.0170035
FOXP3	-0.37942	0.00264655	0.00496798
SMYD3	-0.587716	7.42e-11	4.27e-10
RRN3P2	0.830601	3.25e-08	1.29e-07
CAVIN3	0.99356	1.37e-09	6.59e-09
ANKRD6	0.293667	0.0111347	0.0185122
CIDECP	0.31716	1.29e-06	4.1e-06
LTBP4	0.72224	2.91e-06	8.79e-06
ARHGEF9	0.698194	2.29e-22	7.92e-21
AC092171.2	-0.653485	1.52e-08	6.32e-08
VWA5A	1.52186	1.21e-20	3.03e-19
ABR	0.230284	6.02e-05	0.000148325
STK17A	0.182881	0.0196512	0.0311324
FOXE1	1.47483	6.3e-07	2.09e-06
CNPY4	0.602893	1.47e-11	9.29e-11
C2CD3	-0.224911	0.000172608	0.000396561
CD38	2.77011	3.48e-13	2.76e-12
NAT8L	0.670277	0.00104054	0.00209747
NEFH	1.90926	2.09e-05	5.52e-05
AC124242.1	0.445277	9.39e-05	0.000224287
PGBD5	0.340982	0.00646464	0.0112493
CTDSP2	0.168013	0.0067753	0.0117312
ZNF257	1.24619	2.65e-08	1.06e-07
CFAP157	-0.902972	3.99e-16	4.77e-15
FOXM1	-1.83281	6.06e-31	1.13e-28
PABPC5	0.639059	0.00108741	0.00218536
PSMG4	-0.520766	3.03e-12	2.11e-11
RNF4	-0.203306	1.08e-05	3.01e-05
CDK8	0.137549	0.0132058	0.0216335
EMC1	-0.132163	0.032685	0.0495777
EIF1	0.138078	0.0145183	0.0235762
CHST15	1.11876	1.36e-13	1.14e-12
CDK1	-1.29027	1.37e-13	1.15e-12
RPS28	-0.478355	1.72e-05	4.64e-05
RPL18AP3	-0.336269	0.0110844	0.0184403
GDF10	2.55959	1.19e-18	2.12e-17
COQ9	0.343702	1.58e-07	5.69e-07
WBP4	0.633907	7.35e-22	2.31e-20
HS2ST1	-0.236169	0.0170168	0.0272707
C8G	-0.749004	6.2e-08	2.37e-07
CRELD2	-0.387898	8.95e-05	0.000214698
VAX2	-1.51499	1.23e-09	5.97e-09
SETDB1	-0.153275	0.00105261	0.00211948
AC093157.1	-0.324228	6.01e-05	0.000148174
ORC1	-0.661521	3.27e-08	1.3e-07
FAM198A	0.904011	7.97e-10	3.96e-09
GMPPA	-0.197192	0.0127325	0.0209215
PTP4A2	0.49109	2.71e-18	4.56e-17
EMILIN1	0.860916	2.35e-07	8.26e-07
ID1	1.84894	1.36e-15	1.5e-14
NDUFS4	0.293332	2.47e-05	6.48e-05
COL18A1	0.330768	0.00223452	0.00425213
AP002990.1	-0.3482	0.000442643	0.000948381
FAXC	0.37191	2.05e-06	6.31e-06
STPG1	0.283147	9.23e-05	0.00022093
SF3B6	-0.241028	6.33e-05	0.000155353
AC112491.1	-0.711986	4.36e-07	1.48e-06
AL021707.3	-0.685157	2.15e-05	5.68e-05
AC023509.3	-0.776524	1.17e-06	3.75e-06
C9orf16	0.280942	0.00615715	0.0107526
FUS	-0.385164	2.23e-10	1.2e-09
AC015712.1	-0.415168	0.0002382	0.00053323
NIPSNAP3B	0.473101	1.66e-05	4.47e-05
CXorf56	0.108909	0.00543404	0.00959916
CLCN4	0.400151	0.0130464	0.0213933
NPR1	0.884339	2.24e-10	1.2e-09
MTMR14	-0.175225	0.000400686	0.000865429
DNAL4	-0.132198	0.0171927	0.0275262
ASS1	1.06506	1.08e-10	6.06e-10
USP42	-0.370368	1.63e-10	8.92e-10
RALY-AS1	-0.304421	0.00168071	0.00327056
EMC8	0.247751	9.3e-05	0.000222437
IPP	0.194797	0.000978451	0.00198077
TMEM59	0.202825	0.00451733	0.00810985
SEC23IP	-0.254795	0.000344056	0.000751126
RGS4	0.432824	0.0142344	0.0231616
LINC01679	1.82115	9.72e-21	2.48e-19
SNX6	0.211356	0.00028993	0.000640781
DDX18	0.186709	0.000746254	0.00154101
GTF2IP20	-0.417799	0.00136789	0.00270293
ZNHIT2	-0.445928	3.08e-05	7.95e-05
NCDN	-0.471817	1.12e-10	6.28e-10
RICTOR	0.149387	0.0328384	0.0497817
RUNDC3A-AS1	-1.52402	3.32e-19	6.42e-18
TMEM104	-0.207592	0.00129081	0.00256185
AL449212.1	-1.00884	1.88e-10	1.02e-09
POMT1	-0.31637	5.97e-08	2.29e-07
LRRC8A	0.287565	1.05e-06	3.37e-06
GNA11	0.306238	1.08e-08	4.6e-08
OGFOD2	-0.416055	5.4e-08	2.08e-07
PABPC1P4	1.538	9.57e-25	5.25e-23
CAPN1	0.333774	6.46e-09	2.84e-08
NME1-NME2	-0.526938	0.000128924	0.000301422
DDHD2	0.460263	6.57e-08	2.51e-07
GRIK2	0.981625	1.95e-08	7.99e-08
UPF3A	-0.335549	9.01e-09	3.88e-08
LAGE3	-0.38892	3.36e-05	8.61e-05
CHST6	1.43887	7.88e-14	6.86e-13
USP46-AS1	0.256324	0.000709407	0.00147052
AL391121.1	-0.359963	0.00091503	0.00186137
AC007842.1	-0.409253	0.00364467	0.00666972
ZBED1	-0.185675	0.000562789	0.00118621
SDC2	0.586582	2.57e-05	6.72e-05
SARS	0.14322	0.00428488	0.00772091
EML3	-0.242549	7.34e-05	0.00017839
OFD1	-0.218133	0.000181077	0.000414418
AL590867.2	-0.556872	3.38e-05	8.67e-05
AC011487.1	-1.548	3.21e-08	1.28e-07
GNG12	0.648714	3.52e-17	4.96e-16
HABP4	0.51842	2.6e-11	1.59e-10
TMEM125	-0.503097	5.89e-06	1.7e-05
AC004980.1	-0.269303	0.00407314	0.00736891
UFL1	0.30257	0.000519532	0.00110159
UBN2	-0.220501	0.00230337	0.00437322
FUT4	0.41881	5.59e-11	3.27e-10
HIST1H2BJ	-0.74512	1.21e-05	3.32e-05
LINC00675	2.6297	1.09e-19	2.27e-18
HGH1	-0.698076	1.26e-14	1.22e-13
AC106820.3	-0.745333	6.41e-08	2.45e-07
RP9	-0.19167	0.0158571	0.0255748
TMEM11	-0.186409	0.0047451	0.0084797
ARAP1	0.170453	0.00545635	0.00963672
UQCRHL	-0.60454	3.44e-09	1.57e-08
TARID	1.10199	1.06e-08	4.53e-08
SPACA6	0.367895	0.00205698	0.00393993
WASHC5	-0.2089	0.00700003	0.0120851
PCCB	-0.492137	3.25e-08	1.29e-07
GSTP1	2.42637	4.25e-35	2.06e-32
COMMD5	-0.319155	1.16e-05	3.21e-05
DCUN1D5	-0.540548	3.69e-15	3.83e-14
SLC9A3	-1.15629	1e-05	2.8e-05
CHMP7	0.413077	2.33e-12	1.65e-11
WASHC3	0.171537	0.00906553	0.0153397
SMTNL2	1.89115	1.44e-12	1.05e-11
ASAH1	0.203536	0.0288665	0.0442262
ZNF350	-0.987074	2.83e-20	6.55e-19
CDC20P1	1.64159	5.33e-18	8.57e-17
AC022034.2	1.11327	2.7e-06	8.18e-06
BST1	0.519543	0.000139237	0.000324616
GORAB	0.140293	0.0329713	0.0499625
NADSYN1	-0.248931	0.000154191	0.000357727
KRT15	2.33361	2.52e-08	1.01e-07
IL18BP	-0.269439	0.0127371	0.0209272
GFI1	-0.445614	0.003571	0.00654465
AC009549.1	1.2712	1.76e-13	1.45e-12
FHL1	1.93858	2.24e-19	4.47e-18
SMC6	0.271194	2.8e-05	7.29e-05
ARMC6	-0.509728	3.05e-12	2.12e-11
HK3	-0.903596	1.14e-06	3.64e-06
RSU1	0.624733	2.09e-16	2.61e-15
RPL4	-0.22645	0.00578007	0.0101516
MAD2L1	-0.626107	1.75e-09	8.33e-09
RBPMS	1.39885	1.19e-19	2.45e-18
EIF4A3	-0.125058	0.0167291	0.0268563
AC005261.1	-0.305599	0.0110877	0.0184441
PRPF3	-0.232085	0.000959681	0.00194554
C16orf62	0.424568	7.86e-12	5.16e-11
PXN-AS1	-0.237969	0.00362388	0.00663628
CHMP2B	0.174338	0.0106285	0.0177283
RPS21	-0.391562	0.000288376	0.000637575
ELFN1	0.579886	2.02e-05	5.37e-05
ARID5A	0.418263	0.008703	0.0147828
UBE2N	-0.268658	7.97e-06	2.25e-05
CYSTM1	0.326559	0.000177522	0.000406787
AC138696.2	-0.690882	1.23e-05	3.38e-05
IGSF8	-0.518469	1.42e-10	7.87e-10
TTC41P	-0.428563	5.79e-06	1.67e-05
AC083799.1	-0.239843	0.0158521	0.0255711
IFITM10	0.773347	2.98e-09	1.37e-08
LMO4	0.988758	1.08e-22	3.92e-21
C16orf71	-0.343768	0.000274596	0.000609083
AC092803.2	-0.353202	0.00228098	0.00433294
SCHIP1	1.28158	2.99e-11	1.81e-10
AC004803.1	0.415181	7.74e-11	4.45e-10
SYTL5	0.521043	0.0294289	0.0450054
AP005018.2	1.17139	0.0268428	0.0414148
AC093278.2	0.426907	0.00157339	0.00307895
MOB1B	-0.311504	6e-06	1.73e-05
PIGL	-0.369947	4.89e-05	0.000122173
MRPL57	-0.229752	0.00273526	0.0051199
OLFML2A	1.25985	1.24e-15	1.38e-14
HUS1	-0.315157	1.79e-06	5.57e-06
AP001636.2	-0.951195	2.32e-05	6.1e-05
DNAJC30	-0.163577	0.00715546	0.0123223
PPP1R14BP3	-1.09884	1.34e-15	1.48e-14
ZNF667	-0.632175	4.8e-15	4.93e-14
ATP7B	-0.72779	3.66e-09	1.66e-08
AC132219.2	-0.429545	6.25e-05	0.000153694
TFEC	-0.426802	0.012756	0.0209546
RAB38	1.6542	1.64e-20	4e-19
POLD2	-0.669437	4.35e-16	5.19e-15
PPM1H	-0.822023	6.94e-15	6.93e-14
ACOT2	0.291983	0.00283132	0.00528413
PLSCR4	1.11395	5.28e-14	4.7e-13
HIST1H4I	-0.966392	8.21e-14	7.13e-13
ZNF738	-0.231723	0.0101557	0.0170121
AHRR	-0.675877	1.21e-06	3.85e-06
PDAP1	-0.270136	4.11e-06	1.21e-05
POLRMT	-0.300103	3.13e-05	8.07e-05
MANF	-0.450482	1.19e-06	3.8e-06
LINC01607	-0.837743	1.45e-06	4.56e-06
EIF4E2	-0.17945	0.00024451	0.000546228
ZNF487	0.210561	0.000987004	0.00199633
NENF	0.223928	0.0249257	0.0387033
CYP3A5	2.7536	3.14e-24	1.55e-22
ENTPD7	-0.266004	0.0082024	0.0139944
AC007342.9	-0.61973	0.000384679	0.000832711
CASC4	0.183112	0.0172122	0.0275526
AKIRIN1	0.259618	0.000265252	0.000589704
PITX1	0.661822	0.00254038	0.0047833
ATP6AP1L	-0.283686	0.00451745	0.00810985
FHDC1	0.53243	0.00030267	0.000666939
IL17D	0.390361	0.00332456	0.00612782
RDX	0.298201	0.000373839	0.000810865
CELSR3	-1.65358	6.48e-15	6.52e-14
SLC34A3	-1.3219	2.6e-12	1.83e-11
FGD5-AS1	0.329471	7.11e-08	2.7e-07
DNAJC9	-0.208928	0.000409925	0.000883831
CHRNB1	0.825225	9.88e-16	1.12e-14
CAMK2B	-0.777308	1.71e-05	4.6e-05
DCTN1	0.159273	0.00078602	0.00161733
TMEM241	-1.03197	3.57e-24	1.74e-22
C1QBP	-0.232482	0.00267821	0.00502281
NDUFB8	0.296087	0.000607421	0.00127344
ADAMTS9-AS1	3.0519	2.72e-27	2.34e-25
SGF29	0.272648	0.000453479	0.000969682
AC008105.2	-0.810038	4.35e-07	1.47e-06
AL023284.4	-0.448759	0.00131061	0.00259753
GRHL1	0.24738	0.0135355	0.0221344
AL606834.2	-0.258041	0.0231049	0.0360737
NDUFAF8	-0.335049	0.000842426	0.00172444
PSTK	-0.214779	0.00199815	0.00383561
PAQR3	0.461545	1.32e-05	3.62e-05
AC009014.1	-1.25404	0.00480866	0.0085833
TCP1	-0.387785	1.44e-10	7.95e-10
AC147067.1	-0.509851	0.000335386	0.000733676
TMED7	0.220014	0.0112964	0.0187625
AC008537.2	-0.594899	4.09e-10	2.12e-09
AC002310.6	-0.37101	0.00036565	0.000794412
CENPL	-0.2799	0.000571902	0.0012046
MTRNR2L8	0.431072	0.00753256	0.0129282
FST	1.27486	4.76e-10	2.44e-09
TGFB2-AS1	0.634599	0.00107804	0.00216809
AC024293.1	-0.290962	0.0231304	0.0361104
ARHGEF26	-1.76738	6.6e-37	3.8e-34
AC006213.3	-0.92476	3.22e-11	1.95e-10
TIGD2	-0.258851	0.000123342	0.0002894
SCRN1	1.05438	2.84e-15	2.98e-14
COQ10A	0.454667	1.74e-10	9.44e-10
DDI2	-0.47925	3.28e-12	2.27e-11
GPATCH8	0.162679	0.0196682	0.0311566
KIAA0930	0.352557	8.42e-09	3.65e-08
KIF4A	-2.49174	6.5e-34	2.44e-31
ZNF511	-0.530049	1.13e-06	3.62e-06
MNX1-AS2	-3.5225	5.87e-24	2.71e-22
ANXA8	2.01968	4.03e-10	2.09e-09
ZNF726	-0.597858	1.49e-05	4.05e-05
HLA-DOA	0.65201	3.11e-05	8.03e-05
RCAN1	0.559052	8.19e-07	2.68e-06
PELI3	0.285075	6.4e-05	0.000156965
NTN4	1.20945	1.13e-12	8.36e-12
PECR	0.455707	1.86e-05	4.97e-05
WFIKKN1	-0.968987	7.95e-08	2.99e-07
HSPA2	0.799798	1.6e-07	5.76e-07
SERP1	-0.461735	8.4e-09	3.64e-08
AC098679.1	-0.96284	1.53e-09	7.34e-09
SYDE2	0.346733	0.00118921	0.00237739
CNTNAP3B	1.1059	2.19e-07	7.74e-07
TACR2	1.53887	3.75e-15	3.89e-14
AC003002.1	-0.171693	0.023349	0.0364239
NUP85	-0.295459	1.14e-08	4.84e-08
CD177	1.99038	5.61e-05	0.000138907
GPR135	0.787984	4.67e-16	5.54e-15
JAK2	0.597969	4.75e-11	2.8e-10
PIGG	-0.215065	3.15e-05	8.12e-05
LGR5	0.858326	0.000138442	0.000322816
TM9SF4	-0.216212	2.24e-05	5.91e-05
DCAF11	-0.152584	0.000615974	0.00128903
HERC6	-0.31778	0.00383675	0.00698238
USP9Y	-0.459022	0.000342331	0.000747893
PRRT1	0.681856	3.29e-11	1.98e-10
MYCL	0.41016	0.00872303	0.0148114
ANKDD1A	0.750766	4.54e-14	4.08e-13
CASC10	1.0487	3.28e-13	2.61e-12
AQP11	-0.709822	1.12e-05	3.09e-05
CCDC60	1.71364	2.53e-09	1.18e-08
TCTA	0.145376	0.0279472	0.0429462
LAMTOR5	-0.177911	0.00729619	0.0125517
RAB11FIP4	-0.380016	9.58e-07	3.1e-06
TALDO1	-0.341625	3.06e-06	9.22e-06
GLIPR2	0.541042	3.29e-05	8.45e-05
AC008267.2	-0.319318	0.0100569	0.0168665
NEGR1	1.25581	4.14e-11	2.46e-10
FAM49A	0.532976	3.19e-07	1.1e-06
EHD2	1.36275	1.99e-19	3.99e-18
PLRG1	0.184552	8.59e-09	3.71e-08
AL138781.1	0.389409	0.014047	0.0228977
UBE2Q2P2	-0.401888	8.98e-05	0.000215227
EMC3-AS1	-0.351041	0.00163317	0.00318612
ZNF614	-0.53089	3.66e-06	1.09e-05
PARD6G	0.872884	2.23e-27	1.97e-25
IQANK1	-1.48834	5.07e-30	7.6e-28
HOXA5	0.483116	0.00146314	0.00287755
TPGS1	-0.583535	0.000437121	0.000937422
FGF12	0.889319	0.00195889	0.00376692
GRPEL2	-0.378655	1.68e-10	9.14e-10
NPIPB5	-0.866048	5.14e-06	1.5e-05
TRIM56	0.173899	0.00332251	0.00612579
HNRNPK	-0.214665	2.67e-06	8.12e-06
UBE2J1	-0.20492	0.0101631	0.0170229
ELF1	0.65186	5.7e-11	3.33e-10
FAM129B	-0.148498	0.014378	0.0233753
SAFB2	-0.179312	0.000616994	0.00129087
HHIPL1	0.705457	9.95e-07	3.21e-06
NEURL3	1.41735	5.27e-10	2.69e-09
ZSCAN12	-0.250415	0.0120811	0.0199543
E2F4	0.187871	0.000124291	0.000291442
CLDN10	1.01462	0.00262616	0.00493322
MEX3D	-0.86177	1.69e-25	1.05e-23
KIAA0232	0.23438	7.65e-05	0.000185338
AC036108.3	1.82812	3.7e-22	1.23e-20
AC074032.1	0.27073	0.00644835	0.011222
NFAT5	0.492357	0.001903	0.00366787
TAF1D	-0.753363	3.82e-18	6.31e-17
RTL8C	0.450169	4.31e-08	1.68e-07
PCED1A	-0.691849	4.93e-15	5.05e-14
DVL1	-0.648452	4.4e-14	3.97e-13
FBXO3	0.237461	2.56e-07	8.97e-07
CCAR2	0.236704	0.000124898	0.000292753
MSS51	-0.326259	0.00653678	0.0113609
AC104170.1	-1.74316	4.26e-25	2.47e-23
AC124312.5	0.39492	0.023464	0.036597
PEF1	0.284593	4.04e-07	1.38e-06
ZFAS1	-0.59741	8.21e-09	3.56e-08
NOL4L	0.379018	9.78e-09	4.18e-08
ALG9	0.136232	0.0036142	0.00662118
AL353622.1	-1.97426	7.01e-26	4.65e-24
BAIAP3	-0.983338	1.75e-14	1.66e-13
RABGGTB	-0.525853	8.42e-13	6.34e-12
DICER1-AS1	-0.725394	4.93e-09	2.2e-08
PTP4A3	-1.50323	4.6e-17	6.37e-16
ANKRD40	0.338078	8.17e-11	4.67e-10
C1QTNF2	0.706832	3.45e-05	8.83e-05
CALCOCO2	0.255615	6.92e-11	4e-10
ZNF542P	-0.383073	3.02e-06	9.09e-06
SPATS2L	0.414477	4.89e-06	1.43e-05
SLC48A1	0.35853	1.68e-10	9.17e-10
CDK16	-0.28536	3.29e-09	1.5e-08
PRCD	0.362699	0.0098916	0.0166165
GEMIN6	-0.200773	0.00327653	0.00604707
BSDC1	-0.164814	0.000212108	0.000479951
ARSK	0.523192	9.46e-10	4.65e-09
LINC00641	0.700518	1.99e-11	1.24e-10
RBP7	0.578451	0.000288519	0.000637816
NDUFAF1	0.188359	0.00159767	0.00312215
AC010300.1	-0.38257	0.0176782	0.0282202
PHF12	-0.723064	4.81e-16	5.68e-15
HOTAIRM1	-0.479308	0.00042707	0.000917614
AL109936.2	-0.420557	0.00445947	0.0080167
TEKT2	0.849506	0.000239589	0.000536144
CDKN2B	0.386593	0.00410138	0.00741492
ZNF480	-0.301627	9.13e-08	3.4e-07
MAP3K6	0.214166	0.0160606	0.0258778
NYAP1	1.59347	2.68e-23	1.08e-21
DDIT4L	1.62322	2.73e-09	1.27e-08
SDR39U1	-0.234178	0.000195853	0.000446459
SLC16A11	0.923735	2.46e-05	6.45e-05
FAM96A	-0.549962	3.53e-12	2.44e-11
LINC00622	-0.455242	0.0110395	0.0183722
RNF175	1.7231	2.81e-18	4.71e-17
ZBTB7C	1.73785	1.4e-20	3.48e-19
AP2S1	-0.391413	0.000347479	0.000757882
AP001453.3	-0.697106	4.35e-11	2.57e-10
VAT1	0.412956	1.21e-06	3.84e-06
AC078814.1	-0.546785	1.93e-06	5.96e-06
PCNX2	-0.397137	2.45e-07	8.6e-07
CCDC14	-0.791979	1.72e-15	1.88e-14
EFCAB12	-0.992028	9.81e-11	5.54e-10
TUFM	-0.217914	0.000464421	0.000991238
THEG	-1.26764	2.04e-10	1.1e-09
KCTD2	0.245442	9.97e-07	3.22e-06
AP002360.4	-1.28457	2.57e-14	2.39e-13
AC000123.2	-0.622588	4.5e-09	2.02e-08
SOCS3	1.10134	4.33e-05	0.000109054
GAS1RR	2.24624	2.46e-26	1.77e-24
UNKL	-0.549195	6.22e-12	4.14e-11
AC022387.1	-2.10754	2.82e-17	4.02e-16
SOX15	1.94109	1.13e-28	1.22e-26
CCNA2	-1.63647	4.31e-26	3.02e-24
DNASE1L1	-0.328227	5.71e-08	2.2e-07
IGLV1-40	-0.956328	0.0110602	0.0184017
CGRRF1	0.256285	5.61e-06	1.62e-05
RUVBL2	-0.195165	0.00884156	0.0149961
PIANP	0.985803	3.87e-08	1.52e-07
WNT10B	-1.03884	1.79e-09	8.48e-09
RPL27	-0.257817	0.0019418	0.00373522
MT-ND6	0.607004	0.000688361	0.00143044
BRICD5	-0.65945	1.1e-05	3.05e-05
LINC00908	2.20824	1.33e-24	7.01e-23
NIPA2	-0.378435	0.000127407	0.000298106
MFSD14B	0.170105	0.00658758	0.0114373
GAL	-2.64675	6.53e-24	2.96e-22
RAVER1	-0.253084	0.0171029	0.0273919
TSTD1	-0.247305	0.0104885	0.0175138
PCYT1B	2.09416	5.68e-19	1.05e-17
SLC25A39	-0.565542	5.6e-10	2.85e-09
AC138470.1	-0.55535	6.32e-07	2.1e-06
EIF3H	-0.209323	0.00262071	0.00492449
AMOTL2	0.695105	3.25e-08	1.29e-07
ABHD14B	0.191842	0.0185297	0.0294798
C6orf120	-0.179885	0.00964827	0.0162314
ALAS1	0.169304	0.00872663	0.0148161
FOXO1	0.847208	7.34e-20	1.58e-18
C17orf62	-0.490013	9.31e-12	6.05e-11
MRPL37	-0.419433	1.29e-10	7.18e-10
CRLF3	-0.213152	0.00104943	0.00211401
PSMA5	-0.251149	1.69e-05	4.54e-05
AC123912.4	1.59823	5.39e-12	3.63e-11
PIAS1	0.556744	2.78e-14	2.57e-13
ADCYAP1R1	2.23917	1.18e-17	1.8e-16
FBXO7	0.223113	1.13e-09	5.48e-09
TMEM134	-0.340423	0.000127408	0.000298106
TSEN54	-0.239725	0.000382364	0.000827893
MAGI2-AS3	1.65052	2.49e-25	1.5e-23
CFAP20	0.22197	6.64e-05	0.000162619
ZNF3	-0.48851	1.59e-16	2.02e-15
CBX2	-1.55784	5.28e-17	7.22e-16
OTUD6B-AS1	0.227496	0.000271567	0.000602654
HMGXB4	-0.266086	0.000340266	0.000743646
TFAP2A-AS1	-0.608117	2.26e-05	5.96e-05
FKTN	-0.398973	7.34e-10	3.68e-09
CRTAP	0.658989	2.35e-25	1.42e-23
STYXL1	-0.329794	5.22e-05	0.000130003
AC074117.1	-0.808439	3.42e-19	6.61e-18
TRIM16	0.621787	7.12e-12	4.71e-11
DMAC2	0.186782	0.000118222	0.000278557
BLVRB	0.331221	0.00185112	0.00357461
STMN1	-0.318299	0.00366206	0.00669755
A1BG-AS1	1.26093	1.65e-12	1.2e-11
AC097461.1	0.250201	0.0276217	0.0424885
PIFO	0.501949	0.000999969	0.00202188
AC127070.1	-0.284761	0.0295616	0.0451859
PRELID2	1.28775	1.63e-20	4e-19
STK39	-0.552273	7.29e-06	2.07e-05
CCZ1B	-0.195318	0.0148766	0.0240944
CKS2	-0.616712	1.09e-06	3.49e-06
ATP5F1P5	0.941811	1.16e-07	4.26e-07
CATSPER2P1	-0.500184	1.64e-07	5.91e-07
HMBS	-0.349013	4.08e-05	0.000103177
SLC25A24	0.466328	1.57e-06	4.91e-06
MRPL22	-0.191438	0.00102752	0.00207349
MRO	1.82247	8.17e-21	2.11e-19
SLC25A15	-0.398835	9.02e-05	0.000216131
GADD45B	0.593954	0.00179426	0.00347391
AC009506.1	0.556141	1.75e-12	1.26e-11
FAM84B	-0.873069	1.97e-20	4.74e-19
DAAM2	1.75862	7.51e-21	1.95e-19
TDP1	-0.355385	8.99e-10	4.44e-09
ARHGAP8	-0.780345	8.14e-13	6.15e-12
ZNF571-AS1	-0.891714	3.05e-07	1.06e-06
AC018413.1	1.82467	1.61e-19	3.28e-18
HSD17B13	2.34067	4.39e-11	2.6e-10
FMNL1	-0.43325	9.37e-06	2.62e-05
SPATA24	-0.505271	1.62e-09	7.73e-09
PTCD2	0.218506	0.000408136	0.000880384
SMOC2	-0.316971	0.0179377	0.0285899
SERPINB11	1.22574	0.0242029	0.0376667
NDE1	0.538815	4.98e-10	2.55e-09
AC005682.1	0.578903	0.000304533	0.000670483
CDK18	0.97104	1.55e-12	1.13e-11
AL031123.2	-2.43721	1.8e-42	2.6e-39
WTAPP1	-1.31321	2.31e-07	8.15e-07
SMG1P5	0.377836	0.00535894	0.00948104
HLCS	-0.624317	2.58e-15	2.73e-14
AC024060.1	-1.16063	2.9e-16	3.54e-15
AK1	0.731313	1.37e-09	6.6e-09
FH	-0.127414	0.0308735	0.0469963
TRGVB	-2.12	4.56e-12	3.1e-11
C4B	-1.41979	2.9e-08	1.16e-07
GSR	0.397804	4.11e-07	1.4e-06
PAQR7	1.11929	1.27e-22	4.55e-21
FAM20B	0.327522	2.84e-11	1.73e-10
AP003419.4	-1.38445	2.34e-11	1.45e-10
PDCD6	-0.416484	4.94e-14	4.41e-13
GSEC	-0.481473	2.48e-05	6.5e-05
2019-09-05	-0.87921	5.46e-16	6.42e-15
AMPH	1.20678	3.48e-14	3.18e-13
BRI3BP	-0.510138	1.35e-09	6.5e-09
ZNF775	-0.268119	0.00290884	0.00541784
UCKL1	-0.41001	5.35e-09	2.38e-08
HNRNPH1	-0.262232	7.54e-05	0.000182836
COX16	-0.369831	1.45e-05	3.95e-05
AC015849.3	-0.617349	9.87e-05	0.000234968
CCL23	0.558616	0.0186699	0.0296875
RBM4B	0.11615	0.0141625	0.0230676
OGFRL1	0.832961	1.16e-20	2.9e-19
PPP1R15A	0.49598	0.000732751	0.00151601
BMF	-0.280129	0.0124391	0.0204905
MAN1A1	0.545263	0.000153177	0.00035542
PRKN	0.809327	1.02e-12	7.58e-12
PYCR3	-0.83342	3.84e-14	3.49e-13
AP000844.2	-1.17888	0.00923056	0.0155827
NKAIN1	-1.97365	1.51e-07	5.47e-07
ALOX12	-0.287721	0.00261065	0.00490909
RPE	0.121828	0.0248188	0.0385503
CSDC2	0.865915	5.22e-06	1.52e-05
SIGLEC15	1.19251	1.37e-10	7.57e-10
TMBIM1	0.552779	1.75e-05	4.69e-05
AL596442.2	-1.63308	1.08e-11	6.94e-11
HEATR5A	-0.261724	0.00216237	0.00412507
F2RL2	-2.3017	1.8e-20	4.38e-19
ZDHHC1	0.508929	6.3e-06	1.81e-05
BATF2	0.905705	8.05e-08	3.03e-07
BGLAP	-0.55137	0.0025548	0.004808
SLC29A4	-0.435313	0.0172278	0.0275752
MRAS	0.722177	1.32e-10	7.31e-10
EMB	-0.782809	5.36e-13	4.15e-12
SLC35F5	-0.409861	2.42e-06	7.37e-06
TRAF6	0.291359	6.73e-06	1.92e-05
CBWD1	-0.328828	0.000224985	0.000506293
AC126474.2	0.175129	0.00170152	0.00330712
LMNB1	-1.07094	8.25e-15	8.15e-14
AC025265.1	-1.11982	1.25e-10	6.95e-10
ATP2C2	-0.462629	0.00455436	0.00816417
CD276	-0.535923	5.68e-08	2.18e-07
DUSP28	-0.19042	0.000670821	0.00139603
AC011472.1	1.13336	4.62e-19	8.71e-18
CSNK1E	-0.375885	4.48e-12	3.05e-11
AC079880.1	-0.418176	4.12e-06	1.21e-05
KCNQ4	0.940543	5.66e-12	3.8e-11
NUPR2	1.58082	4.49e-07	1.52e-06
RTN4IP1	0.381014	2.26e-08	9.18e-08
CEND1	2.0635	1.2e-21	3.62e-20
TCEAL2	2.2089	4.7e-21	1.26e-19
PTGER2	0.953813	1.64e-07	5.91e-07
UBN1	-0.32676	1.17e-10	6.52e-10
MELTF-AS1	-0.417842	0.00420294	0.00758514
SLC31A1	0.258453	0.0066848	0.0115887
LINC01979	-1.18575	7.43e-06	2.11e-05
AL355574.1	-0.263354	0.00185757	0.00358632
GFOD1	0.628982	9.21e-09	3.95e-08
PKN3	0.211666	0.0197796	0.0313062
CNTD1	-0.5561	0.000125142	0.000293212
COMMD1	0.159732	0.0277539	0.0426633
CBX4	-0.822791	2e-18	3.42e-17
FOXN3	0.578056	3.41e-11	2.05e-10
NTRK2	1.19646	6.86e-10	3.45e-09
AC090114.2	-0.223431	0.00512726	0.00909824
TMEM182	0.590642	4.58e-08	1.78e-07
MFGE8	0.396748	0.00324904	0.00600112
PFKFB2	-0.435029	1.03e-05	2.88e-05
C17orf49	-0.276967	0.00182021	0.0035197
AC079328.2	-0.971485	4.24e-08	1.66e-07
RNF167	0.211363	9.83e-05	0.000234181
Z83851.1	-0.832799	1.17e-16	1.52e-15
ZSCAN12P1	0.374735	2.08e-05	5.5e-05
LCLAT1	-0.738431	1.66e-17	2.46e-16
PDLIM1	1.25056	1.19e-19	2.46e-18
ATPIF1	-0.282214	0.0001077	0.000255068
KRTCAP3	-0.22295	0.0254059	0.0393859
AL360270.2	-0.637445	2.82e-07	9.83e-07
RNF126	-0.313499	3.49e-05	8.92e-05
LIFR-AS1	0.214396	0.017899	0.0285405
CLIC4	0.968314	3.81e-17	5.35e-16
GPSM1	-0.732094	3.31e-14	3.04e-13
AL391684.1	-0.420751	0.00169078	0.00328875
EFL1	-0.373028	1.42e-07	5.14e-07
GMDS-AS1	-0.276903	2.26e-05	5.96e-05
AC011462.4	-0.858046	1.91e-07	6.8e-07
RIPK3	0.917106	6.88e-09	3.01e-08
NBDY	0.207043	0.001131	0.00226797
C19orf18	-0.89086	6.48e-09	2.85e-08
SLC8A2	1.52561	1.83e-11	1.14e-10
OLFM4	2.41788	2.31e-06	7.05e-06
RAD9B	0.444663	3.57e-07	1.23e-06
EPC2	0.260734	9.07e-05	0.000217027
ARL17B	0.464593	0.0030783	0.0057075
ATP13A2	-0.503585	2.18e-10	1.17e-09
KRT4	2.54369	2.12e-09	9.93e-09
PAX6	0.331679	1.67e-06	5.21e-06
SDF4	-0.15919	0.0127881	0.0210015
SNHG15	-0.579405	7.89e-10	3.93e-09
ITGBL1	-2.16429	7.66e-16	8.79e-15
TAP2	-0.36919	5.96e-05	0.000147074
IPPK	-0.318331	0.00508897	0.00903725
EFHD2	0.618756	7.15e-09	3.12e-08
NBEA	0.379158	0.0012153	0.00242428
ABCA6	0.47457	0.0029757	0.00552951
CLDN3	-1.18574	1.23e-14	1.19e-13
AKT2	-0.168726	2.36e-05	6.21e-05
EEF1A1P22	0.306932	0.0323241	0.0490504
VPS4B	0.262623	3.01e-05	7.77e-05
GALNT6	1.1783	2.77e-14	2.57e-13
ZDHHC3	0.270849	1.03e-06	3.33e-06
SLC25A4	0.610374	4.95e-15	5.07e-14
CYB5B	0.356902	1.4e-09	6.72e-09
CPXM1	1.5914	3.07e-13	2.45e-12
NDRG1	-0.309872	0.0202597	0.0319919
NPM1P27	-0.395306	7.58e-05	0.0001838
CLASP1	0.277469	2.06e-05	5.45e-05
AL139393.2	-0.39132	0.00136244	0.00269244
AC009126.1	0.196014	0.00960935	0.0161718
ACOT11	1.49091	1.94e-18	3.32e-17
BBOF1	0.151945	0.0311987	0.047452
AFAP1	0.258426	0.00103113	0.00208033
PAPD7	-0.139639	0.00407943	0.00737885
CYSLTR1	0.364827	0.0293079	0.044839
DZIP1	1.18418	2.89e-16	3.53e-15
SEC22C	-0.475899	2.21e-09	1.03e-08
GPR161	1.46095	7e-23	2.64e-21
SNX32	-0.475279	0.000578964	0.00121849
CCNB2	-1.48636	2.53e-23	1.02e-21
TRGJP2	-2.46995	1.37e-23	5.87e-22
EMC10	-0.233538	0.000508456	0.00108059
AC061975.7	1.17734	7.37e-13	5.59e-12
WDR74	-0.344408	1.11e-07	4.1e-07
TMEM175	-0.298777	0.000250116	0.000557736
AC023024.1	-1.19897	3.32e-22	1.11e-20
PURA	0.401776	3.5e-09	1.59e-08
PCNP	0.251944	1.28e-07	4.68e-07
DNPEP	-0.254675	4.15e-07	1.41e-06
HOXB-AS1	0.488989	0.0057313	0.0100837
GTF2IRD2B	0.283909	8.36e-07	2.73e-06
AC018754.1	-0.413593	0.00633264	0.0110373
RPS7P11	-0.261381	0.0312852	0.0475798
LNPK	0.269902	3.12e-05	8.05e-05
DDX3Y	0.297747	6.36e-05	0.000156217
MXRA7	1.4701	2.31e-22	7.96e-21
LGALS3	1.48993	1.11e-19	2.3e-18
GLT8D1	-0.172844	0.000119842	0.00028194
CFL2	1.45873	2.77e-29	3.42e-27
TMPRSS3	0.47747	0.0281459	0.0432155
AC002553.1	-0.542605	4.09e-06	1.21e-05
NAP1L5	0.858798	2.85e-11	1.74e-10
CNMD	0.735939	0.0192776	0.0305773
IGKV1-27	-0.829623	0.0289231	0.0442944
ROPN1B	-1.61558	9.87e-14	8.48e-13
CDT1	-1.04702	3.04e-10	1.6e-09
RBSN	0.211677	9.63e-06	2.69e-05
FCF1	0.171697	9.56e-05	0.000228065
CD28	-0.580706	0.00589067	0.0103296
SMARCA4	-0.540399	4.99e-21	1.34e-19
SOHLH2	1.86443	1.89e-06	5.86e-06
TPSB2	0.607497	0.0132055	0.0216335
MRPL14	-0.331172	5.34e-05	0.000132757
LINC00992	-2.01767	1.4e-16	1.8e-15
ZBTB21	0.290042	0.000961294	0.00194839
ZDHHC20	0.171825	0.0215692	0.0338423
QRICH2	-0.934298	4.41e-17	6.12e-16
NFE2L3	-1.06578	1.25e-13	1.06e-12
MIR99AHG	0.435346	0.00355506	0.00652061
SRRM5	-0.427345	0.00010068	0.000239428
PALMD	0.494659	4.08e-06	1.21e-05
TMEM43	0.504587	1.72e-19	3.48e-18
AC009414.2	0.83051	1.34e-10	7.42e-10
KCNG3	-2.15797	1.58e-10	8.68e-10
ENPEP	-0.421409	0.0227563	0.0355715
SH3D21	-0.804276	3.29e-11	1.98e-10
OAS2	-0.693867	0.000546139	0.00115336
SEC61G	-0.540975	1.06e-08	4.52e-08
TRIM11	-0.469096	7.9e-12	5.19e-11
GLIS3	1.39327	4.41e-17	6.12e-16
AC012313.1	-0.221469	0.00121424	0.0024227
ARHGEF4	0.982355	3.33e-16	4.03e-15
DEGS1	-0.673519	1.31e-07	4.8e-07
TMEM50B	0.311495	1.65e-07	5.93e-07
DBNDD1	-1.37211	1.97e-23	8.22e-22
G6PD	-0.135268	0.0235826	0.0367633
ANKRD36	-0.319408	0.022181	0.034746
DPH7	-0.508369	1.07e-09	5.23e-09
GABRP	1.38565	8.58e-05	0.000206578
AC009113.1	0.207745	0.0168076	0.0269635
SCARA3	1.97735	2.86e-30	4.62e-28
BORCS6	0.231672	0.0125309	0.020627
TACSTD2	-0.238965	0.0267087	0.0412356
EIF3J	-0.24747	1.75e-05	4.69e-05
CPA3	0.57931	0.00876873	0.0148808
ZNF541	-0.464915	0.0145284	0.0235885
BCAT2	-0.447349	1.25e-05	3.45e-05
MFN1	-0.281174	1.56e-05	4.23e-05
RTCA	-0.174135	0.00100942	0.00203877
AC068870.2	0.246722	0.020127	0.0317987
F10	1.28322	1.99e-14	1.87e-13
PLEKHH1	-1.03008	3.57e-13	2.83e-12
ZNF865	-0.157123	0.0260655	0.0403305
LPCAT4	0.803859	6.61e-15	6.64e-14
RTEL1-TNFRSF6B	-0.716176	1.16e-07	4.25e-07
CAMSAP2	0.23905	0.000895626	0.00182512
TAL1	0.406405	0.00193326	0.00372082
ACSL1	-0.523507	1.38e-06	4.35e-06
TCAP	1.19027	0.000405209	0.000874276
RBBP7	0.600129	4.07e-23	1.59e-21
AC005253.1	-0.69916	1.27e-08	5.34e-08
PRDM10	-0.392233	5.19e-09	2.31e-08
C14orf93	0.31303	6.7e-08	2.55e-07
UBE2H	-0.142961	0.00399283	0.00723926
C8orf31	1.48431	6.15e-18	9.84e-17
LRRC26	-0.98448	3.62e-05	9.23e-05
AC000068.2	-0.608256	3.27e-06	9.8e-06
LINC00685	-0.851869	4.3e-07	1.46e-06
CWC22	0.252494	1.59e-07	5.75e-07
MBTD1	-0.302235	2.4e-05	6.31e-05
NRDC	-0.364673	2.26e-13	1.84e-12
AC124944.1	-1.56499	2.69e-13	2.16e-12
MT-TY	1.02786	8.16e-05	0.000197197
FAM184A	0.777801	4.06e-09	1.83e-08
MAP3K12	0.550861	2e-07	7.1e-07
ARF5	-0.182075	0.0189322	0.0300736
CCT3	-0.455976	1.04e-10	5.87e-10
ZNF121	-0.663597	3.53e-18	5.86e-17
OR13A1	-1.46352	5.13e-11	3.01e-10
PIWIL2	0.8637	5.55e-06	1.61e-05
CMTM4	-0.807367	1.13e-10	6.34e-10
FP565260.6	-0.936771	1.06e-06	3.41e-06
FAM110D	0.456074	0.00508473	0.00903058
NCL	-0.357632	1.31e-13	1.1e-12
TSPYL1	0.385557	1.38e-07	5.01e-07
AP005205.2	-1.28265	4.53e-10	2.34e-09
GUF1	-0.261074	1.04e-05	2.91e-05
WDR44	0.364791	5.55e-06	1.61e-05
HRH1	0.496293	0.00435793	0.0078441
C5orf30	-1.11948	4.59e-12	3.12e-11
HCG18	-0.126899	0.0117732	0.0194912
NUDT16L1	-0.339932	7.13e-06	2.03e-05
AC053503.4	1.32597	1.04e-07	3.85e-07
PRKRIP1	-0.219492	0.00334864	0.00616902
MED21	0.722268	7.14e-33	2.12e-30
AC009041.4	-0.499947	9.69e-05	0.000231043
AL391834.2	0.347033	4.03e-05	0.000101953
LINC01018	2.17066	1.66e-18	2.88e-17
ZBTB10	-0.793856	3.16e-12	2.19e-11
FBXL17	0.309976	2.88e-05	7.46e-05
DCAF13	-0.645813	1.37e-17	2.06e-16
SPTBN2	-1.27763	7.23e-32	1.64e-29
HTRA1	0.606308	5.66e-08	2.18e-07
BHLHE40	0.505525	0.00450368	0.00808827
ZNF585A	0.214547	2.83e-05	7.34e-05
AC020898.1	0.347124	0.00942787	0.0158896
TRIM52-AS1	0.30274	0.000642406	0.00134099
RNF111	0.196038	0.00355646	0.00652195
RPS7P10	-0.325047	0.0315882	0.0480088
WISP1	0.450991	0.00511035	0.00907085
IST1	0.141015	0.00625238	0.0109067
KIAA0895	-0.387237	1.07e-05	2.97e-05
KANSL3	0.350698	6.69e-18	1.06e-16
TARDBP	-0.13012	0.000649031	0.0013539
CRB3	-0.437394	1.42e-07	5.17e-07
DDX21	-0.488153	4.24e-07	1.44e-06
LRSAM1	-0.394108	4.54e-10	2.34e-09
B3GALT6	-0.754852	2.97e-16	3.62e-15
VMO1	0.517429	0.000140035	0.000326364
MTO1	0.288326	3.13e-10	1.65e-09
DHX29	0.291666	2.03e-05	5.38e-05
HADHB	-0.141605	0.00908743	0.0153706
ADAR	-0.150586	0.0113989	0.0189242
IGHV4-59	-0.874497	0.0241698	0.0376216
P2RX1	2.04418	6.08e-17	8.26e-16
EN2	-2.999	3.41e-14	3.12e-13
TNIP1	0.203176	6.76e-05	0.000165461
INHBE	0.505826	0.000791224	0.0016264
DLG5-AS1	0.358683	0.00767119	0.0131514
TCTE3	-0.692348	1.93e-10	1.05e-09
MESP1	-0.908573	0.000342759	0.000748739
RHOG	0.215809	0.000865711	0.00176866
HBB	1.73492	1.62e-13	1.34e-12
HEY1	0.33035	0.00559595	0.00986343
CANT1	-0.723675	1.15e-15	1.29e-14
MTPN	0.187859	0.00137343	0.00271271
IRF2	0.322456	8.97e-08	3.35e-07
AC096540.1	-0.994532	1.57e-16	2e-15
GNG7	0.390056	1.88e-07	6.7e-07
PGR	1.72962	4.33e-17	6.01e-16
RUNX2	0.656773	3.91e-08	1.54e-07
FGF10	2.19011	5.1e-17	6.98e-16
SNX22	-1.18838	1.52e-11	9.57e-11
ODC1	-0.601917	1.49e-05	4.05e-05
SDC3	0.649301	1.08e-11	6.93e-11
AC012085.2	2.54403	1.58e-26	1.19e-24
NR2F6	-0.472617	1.09e-08	4.63e-08
ADORA2B	0.965291	5.46e-07	1.83e-06
TMEM218	-0.178858	0.000310264	0.000682203
E2F2	-1.592	6.86e-18	1.09e-16
AL132780.2	0.395933	0.000814908	0.00167117
THRA	0.498616	3.02e-13	2.41e-12
MAPK11	-0.300309	0.0143781	0.0233753
PTGES2	-0.30256	0.000101672	0.000241568
ZNF204P	1.93738	2.16e-20	5.11e-19
EMC6	-0.397785	0.000807484	0.0016565
COL4A6	2.51773	1.44e-29	1.97e-27
NAB1	0.546823	3.72e-11	2.23e-10
ZNF793-AS1	-0.532499	7.37e-08	2.79e-07
TSPAN18	1.84766	5.5e-26	3.71e-24
TRMT10A	-0.429602	2.58e-10	1.37e-09
ZNF559-ZNF177	-0.993874	4.66e-13	3.64e-12
DET1	0.137835	0.00509462	0.00904466
ZNF532	0.649752	2.13e-08	8.69e-08
LBHD1	-0.390962	7.89e-06	2.23e-05
SLFN11	0.794552	1.97e-07	7.01e-07
POLR2J3	0.299005	0.012436	0.0204872
CDC42EP4	1.08151	1.87e-32	5.16e-30
TMEM64	0.403719	1.44e-06	4.53e-06
C16orf58	-0.206091	0.00662198	0.0114916
NOL7	-0.0951071	0.0329208	0.0498984
BRMS1L	0.197497	0.000362573	0.000788284
TSLP	2.05405	1.41e-20	3.5e-19
ASH2L	0.320941	1.01e-06	3.26e-06
ADAP2	-0.37354	0.000423912	0.00091164
SLC1A3	1.01455	2.34e-10	1.25e-09
CABYR	0.664119	1.68e-06	5.25e-06
TAF8	0.133514	0.000584749	0.00122913
FNDC10	-1.89465	4.34e-24	2.06e-22
RNF139	-0.168027	0.00930351	0.0156987
BCL7B	0.3103	9e-09	3.87e-08
RGS12	0.575612	8.05e-13	6.09e-12
AC245369.3	-1.21419	0.00164942	0.00321476
PCDHGA11	0.497095	0.0069531	0.0120097
LRRIQ1	-0.996412	1.22e-08	5.13e-08
C1orf53	-0.677363	1.67e-07	6e-07
MT1F	0.745843	0.00217432	0.00414529
TOMM5	-0.202436	0.000659149	0.00137345
RPL35A	-0.371696	1.41e-05	3.84e-05
CCDC157	-0.41138	1.09e-05	3.02e-05
MFSD14C	-0.189093	0.0140926	0.022968
RAB40C	-0.358587	1.11e-06	3.55e-06
C2orf68	-0.202749	1.38e-05	3.78e-05
PRRG3	1.74488	4.95e-12	3.35e-11
LRCH1	0.41944	1.05e-06	3.37e-06
LY6G5B	-0.740718	8.93e-06	2.51e-05
BX322234.1	0.517867	4.6e-05	0.000115462
POTEI	-0.836173	0.00805351	0.013757
AF001548.2	0.73282	2.18e-11	1.35e-10
ZCCHC2	-0.279577	0.000526293	0.00111426
FAM124A	1.56978	1.51e-21	4.47e-20
CLIP3	1.6172	4.55e-22	1.5e-20
CHIC1	0.436883	5.21e-13	4.04e-12
DDX11-AS1	-0.449842	6.43e-05	0.000157736
AC067750.1	0.245969	0.00649973	0.0113029
PRDM5	1.1355	1.81e-18	3.12e-17
PPP4R2	-0.167411	0.0044162	0.00794201
DTD2	-0.265675	2.01e-05	5.34e-05
SLC9A7P1	0.95291	4.07e-09	1.84e-08
OR51C1P	-3.13447	2.4e-15	2.55e-14
ZMYM2	-0.339318	1.73e-07	6.2e-07
LRRN4CL	0.516913	0.00237698	0.00450046
LINC02492	-3.26102	2.07e-23	8.56e-22
B3GNT6	-3.3521	2.29e-09	1.07e-08
C2orf15	-0.608427	2.17e-10	1.17e-09
SLC2A4RG	-0.211901	0.0149132	0.0241494
FTCDNL1	-0.612735	5.28e-07	1.77e-06
FBXL3	0.270538	8.53e-05	0.000205325
CA5B	-0.282162	0.00397599	0.00721228
KIZ	0.245353	1.75e-05	4.69e-05
MPHOSPH9	-0.239737	0.0198774	0.0314475
PLPP1	-0.5918	3.66e-05	9.33e-05
PUDP	0.375972	4.66e-09	2.09e-08
CEACAM19	-0.691832	3.25e-07	1.12e-06
AC026401.3	0.540569	2.72e-07	9.48e-07
HIST1H3D	-1.06369	5.96e-08	2.29e-07
AL357060.2	0.841453	3.02e-09	1.39e-08
TGM4	1.84023	0.00474381	0.00847823
FAM214B	-0.336404	2.25e-05	5.93e-05
ZNF830	-0.209844	6.27e-06	1.8e-05
NONO	-0.394265	2.99e-16	3.64e-15
IMPA1	-0.592265	4.41e-08	1.72e-07
SH3BP1	0.852488	1.19e-11	7.61e-11
RARRES1	1.31142	1.98e-07	7.04e-07
NPM3	-0.456869	4.61e-05	0.00011567
AC006329.2	-1.64003	5.3e-07	1.78e-06
B3GNTL1	-0.592372	3.51e-13	2.78e-12
ITCH	0.138421	0.0186508	0.0296597
MGAT3	0.781819	9.06e-06	2.54e-05
KLHL42	0.579965	4.7e-17	6.49e-16
MBP	-0.332633	2.41e-05	6.33e-05
SIM2	-3.07961	1.22e-57	2.25e-53
GJC1	1.21285	2.68e-14	2.49e-13
C20orf194	1.16052	4.53e-25	2.6e-23
EXO1	-1.65093	8.18e-19	1.49e-17
TANGO6	0.439093	1.29e-10	7.18e-10
SOSTDC1	2.50988	2.13e-21	6.11e-20
AC010973.2	-0.829948	9.89e-08	3.67e-07
TNRC6C-AS1	-0.427771	0.000908159	0.00184923
PIK3R1	1.01191	1.65e-21	4.85e-20
MAF	0.770723	1.56e-07	5.62e-07
DOK5	0.532661	0.00484354	0.00863385
AL078621.3	0.435017	0.000694262	0.00144189
HELZ	0.18453	0.00901173	0.0152566
SLC46A3	0.768294	3.45e-08	1.37e-07
PTRH2	-0.526984	3.9e-11	2.32e-10
SNORA33	-1.40862	1.45e-15	1.59e-14
C22orf39	0.249792	1.45e-05	3.95e-05
STAMBPL1	-0.548446	4.94e-07	1.66e-06
SEC24B-AS1	-0.259358	0.00288439	0.00537555
STAG3L2	-0.36884	1.1e-05	3.05e-05
FAM178B	1.62632	2.86e-17	4.08e-16
SRM	-0.767898	3.3e-14	3.02e-13
MRPS6	0.34715	1.14e-06	3.64e-06
LRRC46	-0.364575	0.0207529	0.0326829
ANKRD33B	1.25367	3.21e-11	1.95e-10
KCNC2	-1.37758	0.00336926	0.00620346
AL645929.1	0.443664	0.0092053	0.0155429
SNX8	-0.605412	9.47e-18	1.47e-16
CHURC1	0.471731	1.3e-11	8.29e-11
SARNP	0.330849	5.99e-06	1.72e-05
WFDC12	1.72765	4.47e-05	0.000112485
SELENON	-0.30923	2.07e-07	7.35e-07
SHTN1	-0.63511	3.57e-15	3.71e-14
KLC2	-0.317608	6.55e-07	2.17e-06
HDAC1	-0.312885	3.95e-05	0.00010032
AC005154.1	-0.730447	2.73e-12	1.92e-11
CNIH1	0.149131	0.00331662	0.00611634
OIP5-AS1	0.351287	2.49e-08	1e-07
FNDC3B	0.265497	0.00189524	0.00365445
LMCD1	0.69616	6.21e-07	2.07e-06
AIFM3	0.88066	1.32e-08	5.53e-08
BLZF1	0.288057	9.11e-07	2.96e-06
SARAF	0.359651	2.1e-05	5.55e-05
GNG12-AS1	0.355012	0.000299398	0.00066044
MROH6	0.379202	0.0105977	0.0176817
PCDHGB3	-0.56995	0.0116785	0.01935
PCDHGC3	0.610788	0.000800129	0.00164269
CAV2	1.66658	9.13e-28	8.86e-26
ATRNL1	1.73585	3.97e-16	4.76e-15
AREL1	-0.383222	3.04e-09	1.4e-08
TMEM232	0.352952	0.00538513	0.00952281
AC010997.4	-0.477495	0.000283626	0.000627601
AC104365.1	-1.46554	0.000346047	0.000755115
TMEM131L	-0.242949	0.0142283	0.0231563
NEK9	0.257926	1.53e-06	4.8e-06
KDM2B	0.159403	0.0158759	0.0256003
NEURL1B	1.17731	1.26e-20	3.14e-19
WARS2	-0.339671	1.05e-07	3.88e-07
RIMKLA	-1.04896	3.9e-19	7.43e-18
MINOS1	0.255504	0.00073613	0.00152266
ASF1A	0.219704	0.00063279	0.00132197
MARCO	0.583622	0.0299714	0.0457439
TOMM40	-0.390831	6.92e-08	2.63e-07
MBNL1-AS1	1.4289	5.91e-23	2.25e-21
AKR7L	-0.836935	3.03e-07	1.05e-06
UST	1.00037	1.28e-12	9.45e-12
PDCD1LG2	0.735797	1.62e-05	4.36e-05
AL355001.2	0.271721	0.0103976	0.0173715
AL022068.1	1.67139	8.3e-11	4.74e-10
APBA3	-0.143094	0.0122697	0.0202404
PMS1	-0.221743	0.000256029	0.00057037
MIR2052HG	-1.15577	0.00189945	0.00366217
RPL31	-0.387148	9.6e-06	2.68e-05
MKX	0.65353	5.24e-05	0.000130416
SLC25A51	-0.192041	0.0015828	0.00309538
ZNF814	-0.599563	2.07e-12	1.47e-11
AC105219.4	-1.63138	3.62e-24	1.75e-22
KDELR2	-0.389366	6.29e-09	2.77e-08
TFCP2	-0.161452	0.00193473	0.00372319
CCDC144NL-AS1	-0.498058	0.00168968	0.00328697
TLE4	0.481739	0.000250307	0.000558094
PKP3	-0.930085	8.9e-23	3.28e-21
MARS2	-0.644956	2.12e-10	1.14e-09
IGFBP3	0.430211	0.0045507	0.0081592
AC254629.1	-0.983921	0.0119759	0.019793
AC131097.2	1.94612	9.42e-12	6.12e-11
AL391069.2	-0.286662	0.00117714	0.00235454
PSPC1	-0.278737	1.39e-09	6.68e-09
ARHGAP24	0.940061	2.52e-13	2.04e-12
ALB	-1.85654	1.59e-07	5.75e-07
UPF2	0.163114	0.0023656	0.00448213
AGBL2	0.456714	0.00247099	0.00466025
KIF22	-0.320415	0.00538351	0.00952124
VIPR1-AS1	-0.925519	1.89e-09	8.93e-09
AL031777.1	-1.64726	1.91e-10	1.03e-09
NINJ1	0.392387	7.22e-08	2.73e-07
EFR3A	0.189024	0.0253934	0.0393698
SEC61A2	-0.160624	0.0265874	0.0410758
SFXN4	-0.619265	1.52e-12	1.11e-11
UCP3	-0.463478	4.18e-05	0.000105448
MYL6B	0.352682	0.00356183	0.00653044
AL355312.1	-0.846389	1.99e-05	5.29e-05
SLC13A3	-1.12271	3.69e-11	2.21e-10
PLA2G12A	-0.415787	3.33e-08	1.32e-07
SPRED2	0.39018	0.000127599	0.000298513
BBIP1	0.110407	0.0304163	0.0463648
SBDSP1	0.357744	3.47e-07	1.19e-06
N4BP2L1	0.512767	5.12e-05	0.000127632
AC009407.1	-1.96135	5.44e-15	5.53e-14
TIMP4	1.73034	1.25e-11	7.99e-11
PITPNC1	0.765811	1.76e-11	1.1e-10
SLIT2	0.739552	4.42e-07	1.5e-06
HAUS3	-0.23051	5.78e-05	0.000142883
GBP5	-0.497281	0.0177223	0.0282833
RSF1	0.1424	0.028921	0.0442944
NCOA7	0.544772	0.00227186	0.00431829
C2orf88	2.99763	6.31e-41	6.84e-38
MON1A	-0.340122	4.68e-06	1.37e-05
LRRC37A17P	0.405452	6.38e-05	0.000156615
HMGXB3	-0.493326	2.2e-15	2.36e-14
LINC00663	0.2348	0.000205075	0.000465238
ANKRD13D	-0.185623	0.0137817	0.022503
DENND6B	-0.245325	0.00465992	0.00833976
GDF7	1.07406	4.13e-08	1.62e-07
GALNS	0.450609	1.12e-06	3.61e-06
STX6	-0.233773	7.26e-05	0.000176593
HIST1H1C	-0.728272	0.000196206	0.000447073
CIDEB	0.901145	1.03e-13	8.82e-13
KCNJ11	-0.504674	0.000197104	0.000448755
AATBC	1.39011	2.5e-09	1.16e-08
ZSCAN20	0.997846	1.16e-08	4.9e-08
MTX2	-0.290145	4.22e-05	0.000106415
AC013726.1	-1.5044	4.74e-18	7.73e-17
LYRM7	0.317001	8.58e-07	2.8e-06
BRD3	-0.29728	0.000302426	0.00066656
AC138409.2	-1.09133	2.18e-11	1.36e-10
LINC01354	0.685418	1.19e-05	3.28e-05
KRBA1	0.305854	0.0166751	0.0267767
HOXB7	0.862705	7.83e-06	2.22e-05
SNORA73B	-1.90321	1.29e-17	1.95e-16
AL645608.8	-0.912651	4.02e-06	1.19e-05
THUMPD3-AS1	-0.72158	6.87e-15	6.87e-14
AL135905.2	-0.413002	0.000121429	0.000285296
TNPO2	-0.150426	0.00077111	0.00158895
AC026803.2	-0.245096	0.0306457	0.0466881
MCPH1	0.332083	6.44e-08	2.46e-07
PABPC1L2B	-1.25211	0.000234545	0.00052575
ZNF57	0.150768	0.0129806	0.021295
C9orf3	0.998734	2.36e-19	4.67e-18
CLEC9A	1.22117	4.98e-10	2.55e-09
LBH	-0.774291	1.01e-05	2.81e-05
SYNM	2.24643	1.03e-23	4.53e-22
PTDSS2	-0.227387	0.00403634	0.00730737
UGT8	1.45079	6.25e-10	3.16e-09
MAPK4	0.847463	2.42e-05	6.36e-05
POMGNT2	0.288745	1.19e-06	3.8e-06
HINT1	-0.277001	7.19e-05	0.000175187
WNT7B	-0.494721	0.00201748	0.0038707
AP000894.4	-0.270983	0.0266076	0.0410968
DYNLT3	0.33232	5.52e-06	1.6e-05
AL627309.8	-0.843415	0.0147631	0.0239358
FAM3D	1.21662	4.81e-05	0.000120443
FKBP11	-0.377763	0.00175611	0.00340541
NDP	2.303	6.91e-20	1.49e-18
SESTD1	0.552651	6.7e-13	5.11e-12
AC005229.4	0.313781	1.32e-05	3.62e-05
SLC4A4	-1.30306	7.63e-08	2.88e-07
RHOBTB1	0.511572	0.00245327	0.00462968
RPL38	-0.441329	7.13e-06	2.03e-05
KAZN	0.474861	9e-08	3.36e-07
RPS16	-0.346407	0.000159947	0.000369872
AP2A2	-0.15047	0.00112967	0.00226574
ZNF214	0.408434	0.000479888	0.00102224
AC008735.2	-1.13903	2.99e-09	1.38e-08
TWIST1	-1.68279	1.87e-12	1.34e-11
ZNF682	-0.379561	1.67e-06	5.2e-06
RPL14	-0.393621	1.28e-05	3.51e-05
AC092123.2	-1.03449	5.32e-15	5.43e-14
CYR61	0.62519	0.00281009	0.0052493
DTNA	1.31818	4.78e-13	3.73e-12
MAFF	0.407168	0.00826267	0.0140842
AC008592.3	0.552647	0.000195992	0.000446721
ADCK5	-0.503501	3.28e-06	9.83e-06
IL1R1	0.320413	0.00765958	0.0131364
PLK5	-0.421812	0.0304184	0.0463648
ILF3-AS1	0.269571	0.00234439	0.00444651
RELL2	-0.997988	7.2e-15	7.18e-14
MAB21L1	1.30382	1.9e-05	5.07e-05
ADAM2	-4.02149	1.01e-17	1.55e-16
CCT6A	-0.368436	6.05e-10	3.07e-09
FAM92A	0.625748	1.72e-14	1.64e-13
RBAK	-0.228941	0.000172042	0.000395361
CISD3	-0.280808	0.00477187	0.00852258
FKBP9P1	1.15184	2.01e-15	2.17e-14
LAPTM4B	0.831825	5.91e-10	3e-09
YIPF3	-0.220398	0.000180804	0.000413895
DIO3OS	0.782657	1.52e-05	4.11e-05
GGT5	-0.373965	0.00483132	0.00861582
NR1D1	0.499726	0.000274888	0.000609583
APOC1	-2.00328	1.81e-20	4.42e-19
RNASE4	1.03492	7.66e-10	3.82e-09
NEK2	-2.25951	7.34e-26	4.83e-24
ARID1A	-0.254127	0.000352971	0.00076904
BAIAP2-AS1	-0.23317	0.000259739	0.000578146
AC093620.1	-0.754666	5.76e-08	2.21e-07
RPL23AP82	0.337169	1.78e-07	6.37e-07
RRAGB	0.301772	3.4e-05	8.7e-05
HIST2H2BE	-0.638323	1.52e-05	4.13e-05
SHMT2	-0.767728	1.04e-17	1.59e-16
MLYCD	0.224406	0.00504045	0.00895972
UQCRH	-0.301452	0.000113774	0.000268556
AP1S1	-0.431072	6.79e-08	2.58e-07
NCLN	-0.518476	4.27e-11	2.53e-10
AC087491.1	-0.744764	0.000110954	0.000262339
AC003991.1	-1.66462	7.61e-12	5.01e-11
TMEM206	-0.45859	6.73e-08	2.56e-07
SAT1	-0.526888	1.2e-05	3.3e-05
ZNF251	-0.344652	1.09e-05	3.01e-05
RCBTB2	1.03368	4.1e-31	7.88e-29
AC008443.1	-0.356785	8.3e-05	0.000200226
VEGFB	0.271715	0.00312188	0.00578249
AP004608.1	-2.85994	1.97e-22	6.9e-21
RBMS1	0.923135	4.34e-16	5.17e-15
HNRNPUL2-BSCL2	-0.868287	8.61e-09	3.72e-08
AC084880.1	1.98504	8.56e-26	5.53e-24
SAFB	-0.312307	8.59e-11	4.89e-10
RFX2	0.526184	1.39e-06	4.4e-06
MAPK8IP1	-0.296788	0.00027859	0.000617422
TMED10P2	0.543153	0.000208517	0.000472291
ANKZF1	-0.706035	1.57e-16	2e-15
DUSP8	-0.315001	0.0219616	0.0344257
AC007566.1	-0.333346	0.0204925	0.032329
LZTS2	0.240163	0.000198058	0.000450595
AC004687.1	-1.26194	1.17e-06	3.73e-06
CCDC51	-0.275035	7.33e-05	0.00017811
MYB	-0.667442	3.49e-05	8.91e-05
PLXNA3	-0.681758	4.1e-16	4.89e-15
XRCC2	-0.712025	7.28e-09	3.18e-08
MMS19	-0.130472	0.00898107	0.0152061
GMPR2	0.112612	0.00309559	0.00573784
ST8SIA5	-0.477855	0.00615289	0.0107464
CHPT1	0.25385	0.00373497	0.00681331
ERGIC1	-0.87709	1.92e-25	1.18e-23
RPTOR	0.344363	6.18e-10	3.13e-09
KDM4A-AS1	-0.639575	8.74e-09	3.77e-08
AC000089.1	-0.673406	5.55e-07	1.86e-06
TSPAN32	0.326329	0.0231395	0.036121
MAP4	0.319877	9.11e-07	2.96e-06
EIF4EBP2	0.596644	6.46e-24	2.95e-22
DFFB	-0.50384	1.46e-13	1.22e-12
CHST8	-0.728267	0.000490584	0.00104418
AC006480.2	-0.745934	4.63e-07	1.57e-06
THEM6	-0.546566	7.4e-08	2.8e-07
HSPB6	2.11093	4.31e-20	9.56e-19
COX5A	-0.399637	5.4e-07	1.81e-06
NMB	0.341659	0.00238548	0.00451237
AIFM1	-0.490069	1.23e-14	1.19e-13
GSTA1	1.26441	0.000645391	0.00134691
MPPED2	0.765534	9.12e-06	2.56e-05
MEF2C-AS1	1.39412	2.59e-15	2.73e-14
EPB41L4A	0.680159	6.43e-05	0.000157616
Z98882.1	-0.388994	0.00202595	0.00388574
LINC01963	0.281331	0.00224171	0.0042645
TAF4B	-0.534343	6.2e-07	2.06e-06
DOC2GP	-1.11272	3e-06	9.06e-06
MALT1	-0.374387	0.00237663	0.00450025
ARVCF	-0.807155	5.74e-20	1.26e-18
RENBP	-0.664241	5.7e-05	0.000141083
ATXN7L1	0.216416	0.00699259	0.0120734
KIF7	0.421829	0.00139746	0.00275721
ITIH5	1.51122	9.25e-20	1.95e-18
ZNF85	-0.378758	9.72e-08	3.61e-07
AC245060.6	-0.880823	5.74e-09	2.54e-08
ZBED3	0.213101	0.024231	0.0377072
AC036176.1	0.515152	1.53e-06	4.8e-06
SLC25A37	-0.735323	1.69e-16	2.14e-15
FAM109A	-0.529303	5.41e-15	5.51e-14
FAM234B	-0.74038	2.24e-08	9.1e-08
CHMP4BP1	-0.602035	0.000346172	0.000755298
CLHC1	-0.189207	0.0200222	0.0316576
UCN	-1.73362	3.51e-24	1.72e-22
ZNF764	-0.368332	7.46e-12	4.92e-11
USF2	-0.225087	1.24e-05	3.41e-05
DEPDC7	1.16424	2.6e-09	1.21e-08
AC015921.1	-1.03712	1.38e-07	5.03e-07
FHL3	0.553332	1.53e-06	4.8e-06
RAD51B	0.582089	2.69e-09	1.25e-08
NDST1	-0.344989	4.88e-06	1.43e-05
AC018645.2	0.727256	1.5e-11	9.49e-11
ZNF248	0.324436	8e-08	3.01e-07
EHMT2-AS1	-1.77273	5.8e-23	2.22e-21
RNF41	-0.371007	9.72e-06	2.72e-05
AC006449.2	-0.219871	0.0252595	0.0391853
AC020915.1	-0.395538	4.38e-10	2.26e-09
SMARCD1	-0.200802	9.29e-07	3.01e-06
TBC1D31	-0.546169	7.6e-09	3.31e-08
FKBP7	0.590753	6.85e-14	6.02e-13
STRADB	-0.657781	3.59e-13	2.84e-12
AC026412.1	-0.248804	0.0196376	0.0311136
ATAD2B	-0.372603	3.07e-07	1.06e-06
DDOST	-0.180662	0.00510888	0.00906911
HSPB1P1	1.29474	8.56e-11	4.88e-10
KCNIP3	1.58437	3.6e-24	1.75e-22
GPNMB	-0.517617	0.00123185	0.00245389
LINC02495	0.634838	0.0169271	0.027134
SFPQ	-0.436107	5.72e-19	1.06e-17
PCBP1-AS1	-0.28885	5.94e-05	0.000146434
TIGD6	-0.198882	0.00632787	0.0110301
NGRN	0.273535	2.82e-07	9.82e-07
AC090616.7	-0.57477	6.46e-07	2.14e-06
RGS16	0.649967	0.00453859	0.00814065
AL122023.1	-0.347954	0.0010471	0.00210978
URB1	0.20691	0.00667148	0.0115678
MECP2	0.379994	6.95e-14	6.1e-13
AL020996.1	-0.20708	0.0102253	0.0171162
NFATC4	0.99624	1.4e-13	1.17e-12
BCO2	0.567912	4e-05	0.000101385
TOP3B	-0.540644	0.000316889	0.000696023
EIF3J-AS1	0.132307	0.0244002	0.0379481
YBX2	1.55728	1.43e-13	1.2e-12
FUBP3	-0.143293	0.0147473	0.0239124
LRTOMT	-0.640068	3.43e-21	9.52e-20
ATOH1	-3.05111	1.22e-09	5.91e-09
TMEM127	0.339141	1.09e-13	9.34e-13
DUXAP8	-1.21777	1.89e-06	5.86e-06
CD55	0.849377	6.54e-09	2.87e-08
PLN	1.475	2.4e-13	1.95e-12
LYPLA1	-0.771302	2.1e-12	1.5e-11
FBXO27	1.18341	1.35e-10	7.48e-10
EML1	0.274268	0.00176189	0.00341447
LNPEP	0.295906	8.92e-05	0.000213891
NUP93	-0.328241	0.000195649	0.000446049
LINC01451	1.59102	3.84e-10	2e-09
YARS2	-0.202564	6.8e-05	0.000166268
ZNF669	-0.221699	0.006944	0.0119963
ZNF581	-0.549494	1.58e-07	5.7e-07
ALMS1-IT1	-0.683547	2.45e-06	7.48e-06
FAHD2CP	0.346971	0.00813191	0.0138806
PLP2	1.5244	8.75e-31	1.56e-28
RERG	1.11903	1.65e-15	1.8e-14
OXCT1-AS1	0.394752	9.74e-05	0.000232166
FAM192A	0.162855	0.00091481	0.00186113
CACNB3	-0.444621	2.11e-06	6.48e-06
GALNT13	1.23758	4.46e-05	0.000112202
AL691432.2	-0.217244	0.00766802	0.0131476
THAP11	0.396037	9.26e-12	6.02e-11
KRT13	3.80414	1.63e-13	1.35e-12
AF131216.3	0.969442	1.09e-05	3.02e-05
RBBP9	0.320758	1.69e-06	5.27e-06
PRKAR2A	0.211335	0.000935205	0.00189948
ATP6V0B	-0.381621	1.53e-05	4.15e-05
SPATA17	-0.254643	0.0203637	0.0321424
SKP1	0.223401	2.05e-05	5.44e-05
AL031282.1	-0.686985	2.49e-05	6.54e-05
PEX14	0.656885	1.19e-25	7.52e-24
ZBTB38	0.664622	2.93e-13	2.34e-12
PAFAH1B1	0.350482	5.4e-12	3.64e-11
MAGEE1	0.31951	0.0123413	0.0203494
OSTF1	0.233553	8.5e-06	2.4e-05
FBLIM1	0.896244	1.87e-22	6.57e-21
FYCO1	0.501614	4.4e-09	1.98e-08
PLTP	0.674643	8.9e-05	0.000213513
ZNF321P	-0.239802	0.0146418	0.0237538
CTIF	0.504074	3.47e-10	1.81e-09
AL645608.1	0.766997	0.00029842	0.00065836
LGALS8-AS1	-1.55153	7.91e-17	1.06e-15
MINK1	0.17707	0.00427787	0.00770979
EZH2	-1.6824	8.55e-44	1.75e-40
SLC25A1	-0.241468	0.00542248	0.00958303
AL163636.2	1.27198	4.96e-10	2.54e-09
PLEKHB1	-0.790943	3.22e-06	9.67e-06
AC116667.1	0.41831	0.00605761	0.0105951
ZFP37	0.339615	0.0177862	0.0283704
AP001107.1	-0.752891	1.01e-12	7.5e-12
IGHV3-15	-1.27369	0.000580304	0.00122076
RNASEK	-0.168303	0.00862903	0.0146694
PHKA2-AS1	-0.599969	0.00108594	0.00218301
AC018638.6	-0.795756	2.17e-06	6.66e-06
SPRN	-0.540875	7.21e-06	2.05e-05
HBEGF	0.832149	4.57e-06	1.34e-05
POU2AF1	1.35057	3.8e-08	1.49e-07
MRPL12	-0.596474	2.9e-05	7.53e-05
AC004540.2	-0.732032	0.00919373	0.0155305
R3HDM4	-0.140849	0.0265644	0.0410472
GNPDA1	0.159191	0.00472413	0.00844633
AZIN1-AS1	-0.263123	0.00430327	0.00775329
RASAL1	1.65616	9.11e-11	5.16e-10
DDAH1	-0.550197	4.03e-10	2.09e-09
AC091544.2	-1.88916	3.6e-11	2.16e-10
ACBD5	-0.209963	0.00472796	0.00845235
AC007731.2	-1.17935	9.24e-11	5.23e-10
SLC35B2	-0.417494	3.34e-10	1.75e-09
SAMD13	-0.748027	0.000103007	0.000244551
DNASE1L3	1.1095	1.47e-08	6.11e-08
CHEK1	0.373418	0.00119546	0.00238808
CEBPB-AS1	0.564649	6.11e-10	3.09e-09
ZNF8	-0.345522	1.04e-07	3.85e-07
FZD2	0.595063	3.34e-05	8.56e-05
PART1	-0.384812	0.0320453	0.0486585
MRAP2	1.54257	1.31e-21	3.95e-20
MAP3K14	0.677864	4.57e-10	2.35e-09
GOLPH3	-0.479877	6.49e-10	3.27e-09
AC003681.1	-0.749245	1.02e-09	4.98e-09
TTLL1	-0.131424	0.030163	0.0460212
ZNF117	-0.46233	6.42e-07	2.13e-06
NKRF	-0.155916	0.00246994	0.00465876
DUSP2	1.53091	3.67e-12	2.52e-11
TMEM35B	0.563276	1.96e-11	1.22e-10
HSD17B11	-0.426876	0.00197422	0.00379403
SECISBP2	-0.49426	2.61e-20	6.08e-19
URI1	-0.168414	0.004211	0.00759893
TNNC2	1.3744	1.21e-08	5.11e-08
GPCPD1	0.51374	9.19e-10	4.53e-09
SYN1	0.639442	1.7e-05	4.57e-05
GRK3	-0.488185	3.84e-06	1.14e-05
RIPPLY3	-0.811543	5.82e-07	1.94e-06
HDDC3	-0.244697	0.00279388	0.0052222
APBB1	1.03876	7.06e-23	2.65e-21
SND1	-0.474531	4.16e-11	2.47e-10
ARHGAP45	-0.488233	2.59e-06	7.88e-06
C1orf123	0.244611	4.16e-05	0.000104994
B4GALT1	0.37535	1.35e-05	3.69e-05
EMBP1	-0.953366	0.0012397	0.00246887
WHAMMP2	0.426812	8.3e-05	0.000200177
GDI1	-0.329142	4.65e-09	2.08e-08
ZNF81	0.29413	0.0021565	0.00411514
VSNL1	2.51393	8.96e-17	1.19e-15
GSAP	-0.397077	6.81e-07	2.25e-06
RAET1G	0.819172	1.82e-08	7.46e-08
LRRC4	1.23066	1.44e-10	7.94e-10
IGFBP7	0.35181	0.00672959	0.0116597
OR2W3	-0.725512	0.00262233	0.00492704
ARHGAP4	-0.348337	0.0024038	0.00454285
NDUFAF6	-0.662304	9.65e-17	1.27e-15
STRIP2	0.651592	7.88e-05	0.000190611
WTIP	0.236663	0.0151188	0.0244544
OVGP1	-0.423708	0.00915138	0.0154674
GTPBP3	-0.547625	2.54e-18	4.31e-17
THAP8	0.232582	0.000256679	0.00057175
AL157756.1	-1.2172	9.74e-12	6.31e-11
ARL4C	0.808143	9.64e-10	4.73e-09
SCD5	0.97844	8.23e-12	5.39e-11
ATG4B	-0.204595	0.00119446	0.00238658
AC040169.1	-0.457108	0.00706214	0.0121764
MAL	2.79222	9.04e-27	7.18e-25
PLEKHG2	0.297403	0.00895266	0.015165
WDR5B	-0.374001	7.84e-08	2.95e-07
GALR1	2.51461	4.95e-17	6.8e-16
AP003733.4	-0.514143	0.00021686	0.000490104
FBRSL1	-0.430272	2.65e-11	1.62e-10
ARMC8	0.103894	0.0171104	0.0273993
GRIN2C	-0.382299	0.0106372	0.0177395
SLC47A1	1.67157	9.18e-21	2.35e-19
DCUN1D3	0.32546	0.000100971	0.000240089
DMPK	1.00619	1.69e-15	1.85e-14
PAN2	-0.183417	0.0112171	0.0186409
AC006213.6	-0.439743	5.44e-07	1.82e-06
CBR4	-0.407398	1.12e-05	3.1e-05
AL365203.3	0.362352	0.000418732	0.000900922
SH3RF3-AS1	0.337154	0.0204258	0.0322344
MAFG-AS1	-0.358079	0.00934437	0.0157618
IDNK	0.373347	1.42e-05	3.88e-05
SERPINA1	0.488073	0.0204273	0.0322344
SMYD5	-0.175684	0.000508351	0.00108049
KRT7-AS	1.05937	0.0012029	0.00240164
RPS13	-0.280964	0.000579859	0.0012201
LDAH	1.42177	2.1e-11	1.3e-10
NPPA-AS1	-0.96839	4.96e-06	1.45e-05
SLC22A20	0.666368	1.31e-05	3.58e-05
SYNE4	-0.866705	6.67e-17	8.98e-16
RCC2	-0.618386	1.57e-16	2e-15
ALDH1A2	2.04361	1.04e-24	5.7e-23
TMEM230	0.13137	0.0214125	0.0336107
RNF103	-0.202669	0.000449771	0.000962533
MAMSTR	1.1664	2.73e-21	7.67e-20
AHCY	-0.308684	2.62e-05	6.83e-05
AC009495.3	-1.02044	1.5e-10	8.25e-10
EGR1	0.947762	0.000408899	0.000881928
THSD1	0.712755	8.53e-09	3.69e-08
KHK	0.271577	0.00630561	0.0109934
SLC12A2	-0.733812	3.47e-07	1.19e-06
RDH5	0.855725	1.71e-08	7.03e-08
PTGFR	0.732215	0.0271873	0.0418762
TMEM8A	-0.533802	9.76e-09	4.17e-08
AL354872.2	-0.36955	0.00384916	0.00700151
STPG3-AS1	-1.30629	3.3e-10	1.73e-09
NLGN2	0.340689	7.43e-05	0.000180445
EXOSC9	-0.242971	1.17e-06	3.73e-06
ZNF566	-0.34923	3.18e-09	1.46e-08
CTAGE7P	-1.13087	2.86e-09	1.32e-08
TMEM252	2.74712	9.32e-21	2.38e-19
AC106028.3	-1.07564	2.11e-16	2.63e-15
PLAGL1	0.531294	0.000145752	0.000338917
AC098934.2	-0.954913	4.96e-13	3.86e-12
PCDHA11	-0.954754	0.0212248	0.0333673
AC002128.1	-1.39623	6.35e-17	8.59e-16
KLF6	0.425253	0.00608613	0.0106369
THBD	0.543771	0.00153112	0.00300325
ABCD2	1.14275	1.2e-08	5.07e-08
ITGB7	0.424709	0.0294971	0.0450985
AC092171.4	-1.63842	1.85e-15	2.01e-14
DNAJC7	-0.244337	1.51e-06	4.73e-06
AC010326.3	-0.648585	1.25e-17	1.89e-16
NFYC-AS1	-0.590383	6.54e-07	2.17e-06
SCUBE1	1.10943	6.96e-10	3.49e-09
SMIM8	0.340953	1.5e-06	4.72e-06
CDH17	1.39999	2.01e-08	8.21e-08
FAAH	-0.837722	1.3e-11	8.26e-11
AC000403.1	-0.4532	0.00289187	0.00538786
KIAA1524	-0.254713	0.0177177	0.0282783
TM7SF2	-0.816399	8.47e-11	4.83e-10
FLOT2	0.215391	0.000127954	0.000299232
AC010186.3	0.618242	3.12e-09	1.43e-08
VPS9D1-AS1	-1.87388	3.59e-30	5.56e-28
ZDHHC4	0.298638	1.99e-05	5.3e-05
ADGRL1	0.570191	3.66e-05	9.33e-05
MAP10	0.940227	1.06e-07	3.9e-07
PPM1M	0.581684	1.77e-14	1.67e-13
ANKRD42	0.351315	1.34e-10	7.45e-10
PDE9A	-0.594906	2.43e-06	7.41e-06
AC007292.1	-0.491094	5.79e-05	0.000143168
AC016739.1	-0.372392	0.0217656	0.0341358
UBR5	-0.246096	0.00386219	0.00702314
LINC00894	-1.02566	2.88e-08	1.15e-07
AL136454.1	-0.292033	0.0308022	0.0469033
CRYBA2	-1.66946	7.14e-14	6.26e-13
TLNRD1	-0.198615	0.0134182	0.0219503
EYA1	1.27023	8.02e-09	3.48e-08
KCNQ1OT1	-0.482309	0.000208675	0.00047259
EPS8L1	-0.390701	0.00199149	0.00382482
MAPK14	0.286341	1.23e-07	4.49e-07
AL354892.2	-0.415437	2.07e-07	7.36e-07
AP001626.1	-1.14944	6.84e-09	3e-08
GTF2F2	0.282858	1.97e-05	5.25e-05
TOB1-AS1	-0.272126	0.00547502	0.00966785
PLA1A	-1.02898	5.92e-05	0.000146081
WDR17	0.526366	0.0309528	0.0471052
AP002360.2	-0.254917	0.0197644	0.0312876
NHP2	-0.375548	1.33e-07	4.86e-07
AL359504.2	-0.538101	7.36e-05	0.000178708
CLCN2	-0.529413	2.19e-11	1.36e-10
HOXA10-AS	-0.678692	4.11e-07	1.4e-06
SELENOH	-0.273927	0.000529574	0.00112069
EMID1	0.915546	4.75e-08	1.84e-07
COL6A2	0.75937	1.18e-07	4.34e-07
TMEM132C	2.71208	7.66e-23	2.86e-21
MFSD2A	2.39521	2.2e-23	9.07e-22
TMEM47	1.10179	3.01e-15	3.15e-14
HIST1H2BN	-1.22964	1.95e-23	8.18e-22
AC122688.3	-0.930725	1.05e-11	6.76e-11
MAP3K8	0.673615	1.78e-05	4.78e-05
HSF2BP	-0.34399	0.00370792	0.00676865
DLG4	0.87457	1.35e-12	9.88e-12
AKAP10	0.212135	4.75e-06	1.39e-05
AL138976.2	-0.339705	0.0022434	0.00426685
KLHDC8B	0.412203	8.81e-07	2.87e-06
EFCAB14	0.351635	1.42e-09	6.81e-09
STOM	1.10788	9.89e-17	1.3e-15
FMC1	-0.411616	7.9e-05	0.000191089
PLEKHA3	0.239111	5.2e-06	1.51e-05
CPSF3	-0.123264	0.00897402	0.0151956
TMEM14A	0.152957	0.0206915	0.0325927
AC011497.2	0.545171	0.000155942	0.000361426
AC108860.2	-1.04202	2.66e-16	3.27e-15
TCP11L1	0.33505	2.14e-05	5.65e-05
MYH3	1.19055	1.04e-05	2.91e-05
HOGA1	2.164	3.39e-25	1.99e-23
RAB23	0.564192	0.000101383	0.000240944
ROCK1P1	-0.447908	0.000161689	0.000373385
ARPP19	0.312561	9.29e-10	4.57e-09
MIR100HG	1.43346	5.93e-17	8.06e-16
ST20-AS1	-0.241636	0.0141684	0.0230711
SPEF1	-0.603061	0.00600547	0.0105138
AC090517.2	-0.620767	3.91e-07	1.34e-06
MAP2K2	-0.221639	0.004965	0.00883413
SAMD8	0.350969	1.19e-07	4.37e-07
MPI	-0.270961	8.6e-05	0.000206925
AC027228.2	-1.22129	1.11e-09	5.43e-09
ZEB1-AS1	-0.289319	0.000659981	0.00137492
HLA-DMB	-0.913495	0.00017418	0.000399924
AC012213.1	-1.57268	4.13e-08	1.62e-07
ANGEL1	-0.230401	7.7e-05	0.000186545
CARS2	-0.158971	0.0252526	0.0391779
HLA-A	0.428916	0.00368507	0.00673361
MAML3	-0.418968	1.44e-07	5.22e-07
IGHV3-30	-1.04455	0.00593021	0.010392
EDNRB	1.4683	1.24e-12	9.17e-12
LDHA	-0.461462	3.11e-07	1.08e-06
FAM167A	1.87933	1.04e-14	1.02e-13
C14orf80	-0.46549	5.87e-06	1.69e-05
SCD	-0.631267	0.00339664	0.00625057
SDHAP1	-0.239382	0.0196951	0.0311859
FAM229B	0.912215	2.33e-20	5.47e-19
PHF19	0.67978	2.3e-16	2.85e-15
ATP5S	0.160283	4.23e-05	0.000106605
XKR5	1.67231	6.77e-16	7.86e-15
RBM14-RBM4	-0.198876	0.00321766	0.00594735
SPDYE3	-0.152427	0.00698731	0.0120654
PPP2R5C	0.284773	1.34e-11	8.51e-11
AL132657.1	-0.26396	0.0182973	0.0291278
CAPG	1.58625	3.73e-23	1.47e-21
WDR36	0.236389	0.000184956	0.00042277
TPCN2	0.141457	0.022452	0.0351317
SLAMF8	-0.568166	0.000563364	0.00118729
AC008610.1	-1.08672	5.43e-10	2.77e-09
MPZL1	-0.241444	3.37e-06	1.01e-05
LINC01091	0.708253	0.000158717	0.000367489
PARPBP	-0.384431	0.00123979	0.00246887
MAD1L1	-0.331488	0.000330721	0.000724589
SPIN4	-0.845545	1.02e-11	6.57e-11
FAR2P1	-2.0858	9.93e-10	4.87e-09
TRPT1	-0.277898	0.000767716	0.00158285
AL021068.1	-0.48118	0.00347197	0.00637965
ZNF296	0.587623	0.000182306	0.000417127
INPP1	1.12143	7.34e-16	8.46e-15
NOP16	-0.728529	7.87e-15	7.79e-14
ANKRD11	0.220877	0.000772636	0.00159174
PCNX4	-0.23323	0.00488879	0.00870693
CAP1	0.318936	1.1e-13	9.37e-13
EIF5A2	0.502865	0.00011372	0.000268465
SPATA41	0.915753	5.55e-13	4.28e-12
GUCY2D	-0.520599	0.0259175	0.040125
GATD1	-0.391081	3.2e-10	1.68e-09
PLD5	1.41056	4.33e-07	1.47e-06
N6AMT1	-0.133892	0.0176107	0.0281223
DPYS	2.2794	2.03e-07	7.22e-07
ATG4D	-0.270771	1.37e-05	3.74e-05
TGM3	-2.37324	6.83e-17	9.17e-16
FBXW9	-0.604699	9.81e-11	5.54e-10
MTCH1	0.270983	2.12e-08	8.64e-08
WDR4	-0.503246	8.75e-11	4.98e-10
HK1	0.369103	5.75e-10	2.92e-09
SLIRP	-0.374962	6.92e-05	0.000168848
AC010615.2	-0.654898	2.84e-06	8.6e-06
MRPL35	0.230612	2.38e-07	8.39e-07
AL513534.1	-0.250947	0.0206354	0.0325239
SLC35G1	0.548194	1.25e-06	3.97e-06
CRLF1	-1.02459	7.75e-08	2.92e-07
ABI3BP	0.639641	0.000364829	0.000792908
LAMTOR5-AS1	-0.60004	1.11e-13	9.51e-13
PRR15L	-0.639155	2.36e-08	9.52e-08
AC011978.2	-0.39649	5.66e-05	0.000140348
AC004947.2	-1.65726	1.27e-10	7.08e-10
ZNF497	-0.541327	1.27e-09	6.14e-09
C12orf60	-0.430059	0.00800484	0.013684
AP003108.5	-1.92867	1.93e-13	1.59e-12
SLC30A4	-0.550351	0.00104407	0.00210436
C5orf34	0.909752	2.58e-18	4.36e-17
TUB	0.340188	0.00284173	0.00530195
KLF12	0.701802	3.21e-07	1.11e-06
ARHGEF18	0.190022	0.0144927	0.0235368
TRMT13	-0.165878	0.0102955	0.0172244
ITM2C	0.820737	5.31e-10	2.71e-09
PIGCP1	0.461195	0.00251104	0.00473288
RUNDC3B	0.569367	1.63e-05	4.41e-05
SCAMP5	-0.440547	0.000725021	0.00150103
IL17RB	-0.644599	3.69e-12	2.54e-11
CENPA	-2.57622	4.47e-33	1.35e-30
TCTEX1D2	-0.255514	0.0117001	0.0193789
MCAM	1.18684	4.01e-14	3.64e-13
POLR3E	-0.480089	9.05e-19	1.64e-17
AC003973.3	0.907148	7.51e-05	0.000182223
AC025181.2	-0.405275	1e-07	3.71e-07
CDCA7	0.597095	0.00126051	0.0025067
MINDY3	-0.166037	0.0114292	0.0189711
THG1L	0.244112	0.000103558	0.000245732
C14orf166	-0.189573	0.000379739	0.000823082
DUX4L50	1.55432	5.6e-16	6.56e-15
PPIB	-0.45619	8.68e-07	2.83e-06
RPL13AP5	-0.41358	0.00145516	0.00286249
CCDC127	0.16132	0.00163985	0.00319711
SFN	0.603904	0.0126969	0.020876
DENND5B	0.363335	0.00191543	0.00369003
GOLGA5	-0.223436	0.000448631	0.000960318
OVOL2	-0.232868	0.0045971	0.00823598
C10orf95	-1.3164	2.3e-22	7.95e-21
PYGO2	-0.0966132	0.0283652	0.0435268
LCA5	1.04885	2.05e-20	4.91e-19
ASRGL1	-0.607638	0.000231376	0.000519343
RDH16	0.767497	0.00295394	0.00549461
ZBTB11-AS1	-0.158143	0.0105865	0.0176645
SNHG7	-0.764892	4.11e-09	1.85e-08
PTX3	1.00689	7.64e-06	2.17e-05
CENPN	-1.35204	2.56e-13	2.07e-12
SCGB3A1	3.13075	1.54e-19	3.13e-18
MRPL50	-0.279183	3.69e-07	1.27e-06
TMED2	-0.157787	0.0159038	0.0256358
ANG	0.905517	5.33e-07	1.79e-06
SLC26A11	-0.175802	0.00103208	0.00208156
NMT2	0.221261	0.000249396	0.000556282
CASC2	0.269044	0.00166681	0.00324693
OSGEPL1	-0.15857	0.00317643	0.00587585
CENPC	0.265471	8.13e-07	2.66e-06
PPP1R26	-0.378392	5.6e-08	2.16e-07
DKC1	-0.482206	6.54e-18	1.04e-16
AP002800.1	2.07735	6.57e-15	6.61e-14
CREBZF	-0.464296	9.59e-12	6.22e-11
NSUN5P1	-1.10883	5.7e-13	4.4e-12
PRPSAP1	-0.213416	0.00012132	0.000285128
PPP1R12C	0.456552	9.1e-09	3.91e-08
GCHFR	0.532763	1.59e-05	4.3e-05
UBD	-0.606393	0.0200296	0.0316639
S100A1	0.516112	0.0073648	0.0126597
RPL6	-0.356964	1.2e-05	3.31e-05
MRPS26	-0.293173	0.00060323	0.00126509
TMEM40	2.43958	1.49e-13	1.24e-12
DNAJB6	0.285823	8.17e-08	3.07e-07
ATP6V0E2-AS1	-0.315932	0.00254186	0.0047856
ZNF787	-0.261131	0.000600468	0.00126001
AC109460.2	-0.949763	3.9e-07	1.33e-06
AC139887.2	-0.558941	2.32e-08	9.4e-08
BRINP1	1.32316	3.47e-07	1.19e-06
AC115223.1	-0.504015	1.03e-07	3.81e-07
NPIPB3	-0.862508	9.34e-07	3.03e-06
AL391832.2	-1.11414	1.11e-08	4.7e-08
MT1X	0.994674	4.11e-07	1.4e-06
MST1	-0.808685	2.54e-07	8.9e-07
MUC4	1.67956	3.07e-06	9.25e-06
RFC4	-0.423472	2.95e-08	1.18e-07
OMA1	-0.172133	0.00569994	0.0100314
ABLIM2	-0.454292	0.000619525	0.00129543
JAZF1	1.49104	1.62e-23	6.87e-22
GNB2	-0.577331	3.69e-11	2.21e-10
AC003965.1	-0.826986	2.29e-08	9.26e-08
CCDC30	0.16802	0.0137202	0.0224086
TMEM63B	-0.330473	4.25e-08	1.66e-07
KAT2A	-0.864243	7.67e-20	1.64e-18
ARRDC4	0.336459	0.000375506	0.000814384
GLYCTK	-0.541167	3.53e-07	1.21e-06
ARFIP2	-0.540741	4.3e-13	3.37e-12
UROS	-0.143956	0.0222077	0.0347818
AKAP17A	-0.253555	0.000236819	0.000530421
HOXA7	1.44723	1.15e-14	1.12e-13
FAM173A	-0.464939	9.87e-05	0.000234972
CNOT10	-0.290357	6.18e-13	4.74e-12
GTF3C2	-0.195636	2.18e-06	6.69e-06
PYM1	-0.280883	0.000304238	0.000669912
SOAT1	-0.381726	6.14e-05	0.000151115
SPAG4	0.303542	0.0228986	0.0357788
MR1	1.34027	5.51e-22	1.77e-20
SLITRK6	2.03531	3.46e-20	7.88e-19
STX16-NPEPL1	-0.956207	7.47e-06	2.12e-05
LIX1	3.30774	6.57e-20	1.42e-18
MIEF1	-0.122945	0.00907635	0.0153547
AL391244.2	0.698283	8.08e-07	2.65e-06
AC010536.1	-0.234625	0.0309691	0.0471262
ORAOV1	-0.42562	1.22e-12	9e-12
AC011487.4	-1.41047	4.79e-06	1.4e-05
ADAM21	-1.78774	2.15e-12	1.53e-11
IFRD1	-0.408459	5.81e-06	1.68e-05
GDPD1	-1.32701	2.63e-20	6.1e-19
KCTD9	0.783091	5.63e-19	1.04e-17
PRR14	-0.117429	0.0269612	0.0415593
AC093525.8	-0.71451	9.72e-05	0.000231635
ZBTB6	-0.172068	0.0193853	0.030735
PABPC4L	1.06104	2.97e-12	2.07e-11
PRRT3	-0.622336	3.57e-08	1.41e-07
PRR11	-0.746339	1.09e-07	4.01e-07
FBXL19	-0.394763	3.49e-09	1.59e-08
ACTN2	1.75334	5.73e-05	0.000141734
SKA1	-1.71522	3.28e-24	1.62e-22
ATG9B	-1.35838	1.8e-16	2.27e-15
NUDT3	0.402581	2.89e-06	8.72e-06
AC135048.4	-1.03069	8.92e-13	6.7e-12
HLA-F-AS1	1.03257	2.52e-13	2.04e-12
DFNA5	0.840667	3.38e-12	2.34e-11
ERG28	0.183806	0.00423715	0.00764238
KLK15	-2.4314	2.52e-20	5.89e-19
HEBP2	-0.590747	3.97e-11	2.37e-10
CHAD	1.45283	1.6e-10	8.76e-10
RAP2B	0.244789	0.00454905	0.00815703
SCGB2B2	-0.321073	0.00760265	0.0130424
CAMK2G	0.934927	7.77e-33	2.24e-30
TLR3	1.19751	7.12e-14	6.24e-13
ZNF260	-0.304424	1.25e-06	3.98e-06
AC078846.1	-0.63809	3.44e-12	2.38e-11
POLB	-0.643582	6.97e-08	2.64e-07
PRICKLE2	1.75062	2.44e-28	2.51e-26
CSRNP3	1.73637	8.05e-20	1.72e-18
MTMR9	0.413593	1.81e-06	5.62e-06
CARMIL3	0.341422	0.021267	0.033425
TRIM58	-1.23002	3.11e-06	9.37e-06
HMGB1P6	0.483973	6.85e-10	3.44e-09
GLMP	-0.200602	0.0302854	0.0461849
H1F0	-0.60709	3.63e-14	3.31e-13
POLR2D	-0.251157	5.78e-06	1.67e-05
TOR1B	-0.627141	7.69e-15	7.64e-14
AC069307.1	-0.552208	0.000377617	0.000818674
INAFM2	0.226372	0.00277845	0.00519494
HNRNPC	-0.15475	0.000437775	0.000938388
TMEM100	1.58788	5.23e-13	4.05e-12
UBAP1L	-0.424026	0.00145178	0.00285674
GAPT	0.440513	0.0121422	0.020048
RNF165	1.74125	1.01e-15	1.14e-14
CCDC142	-0.316752	7.48e-06	2.12e-05
ISG15	-0.874261	0.00014482	0.000336834
MVB12B	0.375171	3.58e-08	1.42e-07
FXR1	-0.100394	0.0205654	0.0324301
AC068282.1	-0.385826	0.00834811	0.0142207
ZBTB14	0.10911	0.0218905	0.03432
CREBL2	0.17311	0.00483202	0.00861582
TGDS	0.226173	0.000722687	0.00149637
AL157700.1	-0.8037	7.26e-08	2.75e-07
MIR4697HG	0.921549	1.48e-08	6.16e-08
SCLY	-0.492174	4.66e-08	1.81e-07
FAAP20	-0.23718	0.00805237	0.0137563
ZNF429	0.187604	0.00483171	0.00861582
AC109322.1	-0.64131	4.14e-08	1.62e-07
TPRA1	-0.182661	0.00603174	0.0105548
ENTPD5	-1.34677	5.35e-14	4.76e-13
CNOT9	-0.202482	5.97e-06	1.72e-05
PDIA5	-0.840029	4.43e-16	5.27e-15
SUCLG1	0.246566	2.97e-06	8.96e-06
WDR47	0.406045	4.76e-08	1.85e-07
AC011477.3	-0.658741	5.77e-14	5.11e-13
Z93930.3	-0.565706	7.14e-06	2.03e-05
AGO1	0.113729	0.0243946	0.0379426
PRKCE	0.449844	8.13e-10	4.04e-09
SPESP1	0.821016	0.0124199	0.0204662
DTD1	-0.335349	8.95e-08	3.34e-07
TUBE1	0.423479	4.62e-09	2.07e-08
CCDC149	-0.274145	2.56e-05	6.69e-05
SKA3	-2.03683	8.99e-32	2.02e-29
RGS2	0.856226	3.93e-07	1.34e-06
AL359878.1	-0.411812	0.00340504	0.00626416
DDX19A	0.4165	1.69e-14	1.6e-13
PDPN	1.4273	1e-16	1.31e-15
AC108673.2	-1.29783	1.34e-13	1.12e-12
P3H4	-0.426403	1.62e-05	4.36e-05
TMA16	-0.337901	6.85e-09	3e-08
MST1R	0.738334	8.57e-06	2.41e-05
PLCXD1	-0.487599	8.63e-10	4.27e-09
GLIS1	2.02176	9.23e-19	1.67e-17
PTMA	-0.223696	0.000351696	0.000766818
MOB3A	0.209394	0.000468933	0.00100064
PRDM11	1.05829	1.58e-30	2.65e-28
AC015813.1	-0.810321	4.59e-09	2.06e-08
PHRF1	-0.275016	4.58e-08	1.78e-07
DIRAS3	1.14013	3.57e-12	2.46e-11
LIPM	-0.618771	0.00660526	0.0114648
AC009501.1	-0.924132	5.83e-07	1.94e-06
ZNF529-AS1	-0.27648	0.000202207	0.000459297
C1QTNF4	0.408488	0.0264149	0.0408367
SIGIRR	-0.270156	0.00236354	0.00447915
DUSP19	1.18152	1.1e-27	1.04e-25
AC067930.6	-0.521043	0.000279087	0.000618449
ARMC3	-1.89405	1.49e-09	7.15e-09
BTBD3	0.332864	1.68e-06	5.22e-06
NDUFV3	-0.158759	0.0179026	0.0285438
PPP1R2	0.277687	1.52e-09	7.26e-09
FOSL2	0.543088	1.54e-05	4.19e-05
TUBA4A	1.38714	5.12e-19	9.58e-18
AC019205.3	-0.626341	2.73e-05	7.1e-05
RHPN1	-1.61747	4.39e-25	2.54e-23
LANCL3	1.29324	6.68e-09	2.93e-08
ADGRD1	1.07842	7.26e-07	2.39e-06
AC110285.7	-2.80079	9.8e-29	1.07e-26
MOV10	-0.426521	2.55e-13	2.06e-12
LRIF1	-0.301223	8.84e-06	2.49e-05
H2AFJ	-0.638299	0.00012557	0.000294103
SNHG20	-0.897047	4.06e-23	1.59e-21
TMEM150C	-0.644455	4.48e-08	1.74e-07
KIF26A	0.422184	0.00705306	0.0121641
SKAP1	0.63287	0.000197178	0.000448814
LINC01503	1.56664	1.97e-17	2.9e-16
LEAP2	-0.804332	1.5e-07	5.44e-07
GADD45G	-0.541389	0.00575147	0.0101105
PILRB	-1.03118	2.03e-07	7.22e-07
IFITM3	0.475859	0.000277875	0.000615984
SLU7	0.175349	1.01e-05	2.81e-05
CC2D2A	0.399233	1.59e-05	4.29e-05
B3GNT8	1.87972	7.11e-24	3.17e-22
VPS37C	-0.629465	2.44e-20	5.71e-19
TBX4	1.93823	2.59e-06	7.87e-06
DUSP8P5	-0.317383	0.0118751	0.0196475
UBE2S	-0.762177	3.77e-12	2.58e-11
ANAPC11	-0.199957	0.0301264	0.0459691
NIFK	-0.340928	1.68e-08	6.92e-08
TPRG1	1.28293	3.12e-17	4.43e-16
UBR5-AS1	-0.692779	3.26e-15	3.4e-14
PMEL	0.305251	0.0114057	0.0189338
OCIAD2	-0.270474	0.000360835	0.00078469
PLCG2	0.485717	0.000164825	0.000379816
CDYL2	-0.421035	0.000207528	0.000470396
PGRMC1	0.96667	5.87e-34	2.25e-31
CLDN5	0.786461	6.15e-06	1.77e-05
PTPRN2	-0.714059	7.39e-05	0.000179579
PSAP	0.188369	0.00336941	0.00620346
MYOM2	1.03538	8.69e-07	2.83e-06
NCS1	1.29125	1.42e-23	6.07e-22
CCNL1	-0.40681	5.55e-05	0.000137685
DUSP6	0.635568	3.82e-06	1.13e-05
ADGRB3	1.90728	1.16e-17	1.77e-16
TGFB3	1.43767	1.33e-13	1.12e-12
MSL3P1	-1.42203	2.67e-32	7.02e-30
NAP1L3	0.878885	1.04e-08	4.42e-08
ELK1	-0.188086	0.000477318	0.00101712
B3GALNT1	0.659032	3.43e-06	1.02e-05
C17orf58	-0.495067	5.34e-06	1.55e-05
AARSD1	-0.503447	7e-12	4.63e-11
DMKN	1.88814	4.71e-16	5.58e-15
ADAM33	1.14888	2.59e-09	1.2e-08
ZNF491	-0.368185	1.28e-06	4.05e-06
MAPK6	-0.40431	4.62e-05	0.000115954
DNASE2	0.356519	0.000109474	0.000258971
MSH5	-1.28709	2.13e-17	3.1e-16
LGMN	-0.225127	0.00673425	0.0116667
UBE2R2	-0.316999	3.71e-12	2.55e-11
TATDN2	-0.253419	6.5e-06	1.86e-05
SDCBP	-0.155042	0.0299181	0.0456665
AC011472.2	-0.963185	6.74e-12	4.47e-11
SNPH	1.28219	2.09e-15	2.25e-14
B3GNT4	-0.874888	3.31e-11	1.99e-10
SNX27	0.162194	0.00435862	0.00784458
FOXO4	0.529964	2.41e-13	1.96e-12
ID4	2.11936	2.08e-24	1.05e-22
SOX5	1.2873	8.78e-15	8.66e-14
AC004982.1	-1.64	1.74e-17	2.58e-16
AC008555.8	-0.832735	1.33e-14	1.28e-13
INA	0.64465	0.0197255	0.0312286
FAM136A	-0.51446	9.51e-17	1.25e-15
RIN3	0.711398	2.75e-09	1.27e-08
PERM1	-0.632144	2.4e-05	6.3e-05
NFIX	-0.275103	0.00053194	0.00112518
AKAP1	-0.194759	0.0027115	0.00508007
YBEY	-0.542932	2.73e-08	1.09e-07
PLA2G5	0.559169	1.39e-05	3.8e-05
TIMM10	-0.348112	7.09e-05	0.000172736
MED17	-0.190342	0.000126313	0.000295767
DIP2B	-0.602972	2.39e-13	1.94e-12
PSORS1C1	0.37806	0.0288033	0.0441403
LPA	1.22756	3.7e-08	1.46e-07
LY75	0.981499	5.45e-09	2.41e-08
PNMA8B	1.23013	1.61e-14	1.54e-13
AC008438.1	-0.680489	1.56e-13	1.29e-12
GJA3	-1.41487	8.03e-06	2.27e-05
TMPRSS5	-0.577539	0.000211225	0.000478071
AC138904.1	-1.88921	2.37e-23	9.65e-22
LINC01869	-1.09257	1.76e-10	9.57e-10
ZSCAN2	-0.78683	3.54e-26	2.5e-24
C1GALT1C1L	1.01915	9.49e-09	4.06e-08
AXIN2	0.380181	0.00039533	0.000854662
SLC35E4	0.353362	4.71e-05	0.00011796
LSM5	-0.243034	0.00058165	0.00122317
AC013394.1	-0.478328	0.000456018	0.00097432
ZBTB1	-0.238249	0.000879677	0.00179461
AC092535.4	-2.84919	3.41e-17	4.82e-16
SRRM3	0.895269	6.42e-09	2.82e-08
RPS15A	-0.242701	0.00447946	0.00805105
GINS4	-0.372874	0.00664293	0.0115237
AC011008.2	0.3947	0.00521789	0.00925015
AP1G2	-0.583266	7.83e-11	4.49e-10
AC124944.3	-1.31684	4.1e-15	4.23e-14
HCN2	-1.36475	2.53e-14	2.35e-13
ATP6V1E2	-0.191475	0.00283486	0.00529021
LARGE1	1.18751	1.1e-25	7.02e-24
AC017100.1	-0.471459	2.1e-06	6.46e-06
PLEKHN1	-1.05652	7.54e-16	8.68e-15
MBNL1	0.583324	2.26e-15	2.42e-14
GRIK5	1.04586	2.76e-13	2.22e-12
USP21	-0.0964495	0.0320785	0.0486978
AL133243.2	0.27649	0.000884712	0.00180409
SERPINB1	1.38101	2.55e-17	3.67e-16
GGT7	0.571007	2.17e-05	5.74e-05
HPN-AS1	-3.08988	3.99e-42	5.26e-39
AP001267.3	-0.746886	9.4e-08	3.5e-07
ZNF766	-0.194302	1.67e-05	4.49e-05
PTPN21	0.500921	3.36e-09	1.53e-08
MOK	-0.302313	0.000295435	0.000652243
AC087499.1	1.81999	1.92e-20	4.64e-19
FOS	1.1708	4.11e-05	0.000103772
CYP2D7	-0.93575	2.37e-06	7.23e-06
ZNF226	-0.186648	0.000453615	0.00096986
ZNF773	-0.194969	0.000173162	0.000397784
APH1A	-0.117575	0.0144622	0.0234934
PUS7	-0.622512	2.42e-13	1.97e-12
GTF2IRD2	0.159323	0.0257689	0.0399084
TUBB6	1.12172	4.79e-17	6.61e-16
AC097468.3	-0.416837	3.01e-05	7.78e-05
FOXL2	-2.33373	1.55e-10	8.52e-10
Z95115.1	-0.19123	0.0270537	0.041684
FDXACB1	-0.200286	0.0150456	0.0243552
2019-03-09	-0.409394	1.83e-10	9.93e-10
HTATIP2	0.362333	0.00122548	0.002443
AC092164.1	-0.378046	0.0288723	0.0442314
FGF2	1.44352	2.18e-16	2.71e-15
PHYHIPL	2.46944	2.52e-33	8.02e-31
PRODH	1.82113	4.89e-17	6.74e-16
EPHA6	-0.774716	0.00331885	0.00611964
SLC43A1	-1.4167	1.81e-15	1.96e-14
NTN1	1.15516	3.86e-09	1.75e-08
AL513497.1	-1.13683	3.67e-17	5.16e-16
PCDHB10	-1.00034	2.74e-06	8.32e-06
FCGR2C	-0.601892	0.00275478	0.00515487
VPS28	-0.18866	0.0327065	0.0496062
AP001258.1	-0.816967	4.65e-11	2.74e-10
DIAPH1	-0.517461	9.55e-12	6.2e-11
STKLD1	-0.381043	2.8e-05	7.29e-05
TRAF4	-0.949933	1.29e-24	6.88e-23
RRM2	-2.45395	9.42e-33	2.67e-30
C19orf12	0.165923	0.000284958	0.000630472
COPS8	0.155755	0.000248786	0.000555107
NCBP2	-0.274976	5.99e-08	2.3e-07
HNRNPAB	-0.475197	2.45e-14	2.29e-13
GPSM3	0.498643	0.000153065	0.000355205
ADGRL3	1.83526	1.34e-15	1.48e-14
ENTPD3-AS1	0.241642	0.00913679	0.0154456
LDB2	0.621384	4.64e-06	1.36e-05
MYRFL	-0.522935	0.0133604	0.0218655
AC009065.8	-0.497034	7.37e-06	2.1e-05
SPTB	0.775932	0.000387098	0.000837849
EFEMP2	1.42108	6.51e-21	1.71e-19
AC104532.2	-0.820588	1.34e-07	4.89e-07
AC010976.1	-0.73576	2.63e-06	7.99e-06
AP002387.1	-0.375643	0.0081826	0.0139623
PCM1	0.476931	6.64e-12	4.41e-11
LOH12CR2	0.388352	6.8e-05	0.000166197
[truncated: 7,604 more rows]
