# Supplementary material for: Mapping the Germline and Somatic Mutation Interaction Landscape in Indolent and Aggressive Prostate Cancers
Source: J Oncol. 2019 Nov 13;2019:4168784. doi: 10.1155/2019/4168784 (PMC6878815; doi:10.1155/2019/4168784)
Supplement: Supplementary Materials — Supplementary Table SA: a comprehensive list of single-nucleotide polymorphisms (herein called genetic variants) and genes associated with increased risk of developing prostate cancer and published GWAS reports denoted by the PubMed ID and actual reference from which the data were extracted. Supplementary Table S1A: a complete list of somatic mutated genes found to be significantly differentially expressed in indolent (sheet-1) and aggressive (sheet-2) tumors matched with controls. Supplementary Table S1B: a complete list of nonsomatic mutated genes found to be significantly differentially expressed in indolent (sheet-1) and aggressive (sheet-2) tumors matched with controls. Supplementary Table S2: a comprehensive list of somatic mutated genes in indolent (sheet-1) and aggressive (sheet-2) PCa obtained from TCGA. Supplementary Table S2A: a complete list of somatic mutated genes found to be significantly differentially expressed in only indolent PCa, only aggressive PCa, and both tumors. Supplementary Table S1: a complete list of significantly differentially expressed somatic mutated genes distinguishing patients with indolent PCa from patients with aggressive PCa. Supplementary Table S3A: a complete list of germline mutated genes significantly associated with indolent PCa. Supplementary Table S3B: a complete list of germline mutated genes significantly associated with aggressive PCa. Supplementary Table ISN4: molecular networks enriched with germline and somatic mutations in indolent PCa. Supplementary Table ISN5: molecular networks enriched with germline and somatic mutations in aggressive PCa. [file 4168784.f1.zip › 4168784.f1/Supp_Table_S2.xlsx]

## Sheet: Indolent
Supplementary Table S2 – A comprehensive list of somatic mutated genes in Indolent PCa obtained from TCGA.
Genes	events
TTN	24
MUC16	11
FAT4	10
FLG	10
AHNAK	9
MUC17	9
SPOP	9
AHNAK2	8
SNHG14	8
SPTA1	8
FLG2	7
RYR3	7
OBSCN	7
CHD7	6
PDZD2	6
FZD2	6
BAI3	6
RP1	6
CSMD1	6
RYR2	6
GPR98	5
TNXB	5
KDM6A	5
CSMD3	5
KMT2D	5
BRAF	5
KMT2C	5
ARID1A	5
MACF1	5
CHL1	5
DNAH2	5
MDN1	5
CDH5	5
CNTNAP1	5
HERC2	5
PKHD1	5
NAV2	5
TP53	5
PLEKHG1	5
PTEN	5
FBN2	5
FBN1	5
HHAT	5
FAT3	5
FOXP1	5
ESYT1	4
DLEC1	4
LGR5	4
ADAM29	4
THSD7A	4
OR5L2	4
NCOR1	4
SYNE1	4
PKHD1L1	4
GPR84	4
CNTNAP5	4
ASTN1	4
COL11A1	4
STAB2	4
EHHADH	4
ALPK2	4
MIR4485	4
RNF17	4
CHD6	4
WDR17	4
ANK2	4
LTN1	4
HEATR1	4
LY75	4
MED1	4
CD48	4
PPP2R2B	4
COL6A3	4
MALAT1	4
AIM2	4
CNTN6	4
C6	4
ADAM12	4
MSH6	4
ERLIN2	4
MED12	4
SCN1A	4
FBN3	4
HAS2	4
PCDHA7	4
HRNR	4
PCDHA5	4
TENM3	4
PCDHB12	4
NRP2	4
PAPPA	4
MT-ND4	4
VWF	4
TP53BP1	4
ZNF292	4
KDR	4
DST	4
CP	4
NCOA4	4
VPS13B	4
MMP16	3
DNAH11	3
EML3	3
PALM2-AKAP2	3
ATP2B2	3
ANKRD26	3
LRP1B	3
CLK3	3
KMT2B	3
ZNF536	3
KIF1B	3
TRIP10	3
UPF1	3
SLIT1	3
DAAM2	3
FER1L6	3
LMO7	3
IFT172	3
CBX4	3
NKX3-1	3
BBS4	3
MAP3K12	3
CRAMP1L	3
GRIK3	3
LRP12	3
SLFN11	3
VCAN	3
KLHL42	3
NOVA1	3
MYH4	3
PCDHGC3	3
ADAMTSL1	3
UBR4	3
LTBP3	3
ADAM2	3
COL12A1	3
LAMA2	3
MMP13	3
RTP3	3
OR5AS1	3
MYOM1	3
SPAG16	3
CACNA1E	3
CAMSAP3	3
COPA	3
HMCN1	3
TMCC2	3
ACTRT1	3
PCLO	3
ADAMTS19	3
SMARCA5	3
MAML3	3
MADD	3
PSG1	3
ITPR2	3
PPP1R3A	3
NEB	3
COL3A1	3
SMC2	3
PLCG2	3
DIP2B	3
STIL	3
WIPI1	3
SPTB	3
DNAH9	3
CACNA1S	3
DCP2	3
FLRT2	3
FBXW11	3
MYO7A	3
ZFHX3	3
NES	3
CDH12	3
MOAP1	3
RAET1E	3
FAM120B	3
VAV3	3
DPYSL3	3
ARNT2	3
APBA1	3
PIKFYVE	3
UTRN	3
GATA6	3
PDZRN3	3
LRRK2	3
DYNC1H1	3
UTP14C	3
ASH1L	3
OPA1	3
OSBPL10	3
ZFPM2	3
CHAMP1	3
CSPP1	3
SPAG9	3
CTNNB1	3
ZNF468	3
ARID2	3
FILIP1	3
SMARCA1	3
HERC1	3
C1orf173	3
BRPF1	3
AMFR	3
MRM1	3
ATP9A	3
DMXL2	3
KRT6C	3
XIST	3
ITFG3	3
ESCO1	3
NTNG1	3
ADAM18	3
ADAMTS3	3
LAMC2	3
F5	3
SRRM2	3
DCHS2	3
SSH2	3
RAI14	3
FAM135B	3
SIPA1L2	3
ZNF585B	3
NBPF1	3
STAC2	3
LRIG3	3
PTK7	3
MEGF8	3
KANSL1	3
MAN2A1	3
CD46	3
FREM2	3
TMPRSS2	3
THSD7B	3
PHLDB1	3
ZC3H13	3
KCNT2	3
ECM2	3
DNM1P46	3
TG	3
LAMB1	3
NLRC5	3
ZKSCAN5	3
TSHZ3	3
HEXDC	3
ABCC10	3
PCDHA3	3
RRM1	3
NOTCH4	3
LILRB5	3
ABCA4	3
CUL9	3
ROBO2	3
MYH8	3
CDH23	3
FRG1B	3
SIK3	3
METTL3	3
XIRP2	3
ATP2A2	3
MYOM3	3
ATIC	3
APBB1IP	3
DNAH5	3
SEMA4C	3
MMP2	2
ZHX3	2
SLC6A11	2
EP300	2
CPXM2	2
EPN2	2
MET	2
CCT8L2	2
KNDC1	2
EVC	2
MED13L	2
KIAA1199	2
ACTR8	2
STK25	2
SLC12A4	2
UNC45B	2
CCDC66	2
PPP1R15B	2
TRPM6	2
ATL2	2
GRK1	2
DNAH17	2
ST8SIA4	2
PIWIL3	2
MYH6	2
CBLL1	2
ARL13B	2
ZBTB11	2
SPTBN1	2
NCDN	2
PCDH18	2
DPYD	2
CACNB1	2
COL7A1	2
UFL1	2
KLHL7	2
HEATR5B	2
OSGEP	2
UIMC1	2
ATP7B	2
SFRP2	2
ZAN	2
TTC13	2
PCDHGA10	2
SYDE2	2
MKLN1	2
EMR2	2
NF1	2
NRAP	2
CYP4F12	2
FLI1	2
TEKT2	2
PROS1	2
MORC1	2
LAMA1	2
GRIN2A	2
ARID1B	2
OR6C4	2
NLRP9	2
VCP	2
PCDHGA4	2
ADAMTS17	2
MMP1	2
NCOA6	2
LRRFIP1	2
DDX50	2
ADCY1	2
GRID1	2
ZDHHC17	2
HFM1	2
MDC1	2
DNAH7	2
ANO4	2
KRT72	2
SH3TC2	2
WDR33	2
WDFY3	2
ITGAD	2
SLC17A6	2
PCDH20	2
ZNF285	2
NCAM2	2
BCR	2
ZFP36L1	2
CHD2	2
STAB1	2
BTBD1	2
SLITRK3	2
NFE2L3	2
SSB	2
OR4D6	2
TCERG1	2
UBE2O	2
SZT2	2
PRDM10	2
SRGAP1	2
SLC16A4	2
KLHL18	2
MKL2	2
OR5D18	2
ARHGAP5	2
SLC9A4	2
BAHD1	2
PDE10A	2
NSFL1C	2
ITGAX	2
PGR	2
MT-CO1	2
FCRL5	2
CROCCP2	2
MECOM	2
PDE4DIP	2
NLRP8	2
TRPM3	2
PLG	2
MED12L	2
DNAH8	2
SULF1	2
CDCA2	2
PTGFRN	2
LSR	2
FAT1	2
FNDC3B	2
ZHX1	2
OR10G4	2
MAPKBP1	2
ZNF789	2
DCHS1	2
RGPD3	2
MBOAT7	2
HMGCS1	2
LY9	2
ZBTB7B	2
UBAP2	2
SCN10A	2
SLIT2	2
RSF1	2
WDR83	2
TPR	2
GOT1L1	2
GLP2R	2
DTNA	2
KLK3	2
XPO7	2
NYAP2	2
ABCA13	2
MLLT4	2
ZNF304	2
LBR	2
AFF3	2
LCE1F	2
ST8SIA5	2
MAP4	2
TVP23C	2
QARS	2
NLRC4	2
UNC5B	2
ST6GALNAC5	2
GPR83	2
RTL1	2
DIP2C	2
NFATC4	2
STAG2	2
DSCAML1	2
INTU	2
CDK12	2
TAGLN2	2
OR5AU1	2
MUC3A	2
VWA8	2
ACBD5	2
KIF11	2
PCDHB8	2
OR7D4	2
HSD17B11	2
URI1	2
GPCPD1	2
APBB1	2
CHD3	2
FAT2	2
OR2G2	2
KRTAP5-9	2
TCHHL1	2
PIWIL1	2
ERMP1	2
ARHGAP33	2
SGIP1	2
ALX3	2
ALDH1A2	2
EGR1	2
OTX1	2
FAM171A1	2
LTBP2	2
UBR5	2
KDM1A	2
TRPV2	2
SIM1	2
ZFHX4	2
HIST1H2BN	2
DLG4	2
UNC79	2
ITGB6	2
TLR8	2
OR2AK2	2
UNK	2
BAGE2	2
GRIN2B	2
STAT3	2
ROBO1	2
LRRIQ3	2
ADAM9	2
AMPD1	2
ANKRD11	2
ATM	2
ADAMTS20	2
SPATA31D1	2
PRUNE2	2
SLC4A7	2
WDR64	2
ADCY8	2
PCDHGA12	2
MUC4	2
MIEF1	2
WDFY1	2
CRISP3	2
ADCY10	2
FOXA3	2
SPRED3	2
TOPORS	2
SF1	2
ZCCHC14	2
ZMYM3	2
NUP210	2
NCKAP1	2
XPR1	2
IRF4	2
CD163	2
EPHA3	2
HNF1A	2
GPATCH1	2
GPR179	2
TTC31	2
IGSF10	2
KIAA0907	2
TATDN2	2
LILRB1	2
B3GNT4	2
KCNJ4	2
DGKI	2
SLC16A6	2
TOX4	2
SLITRK5	2
PIK3CA	2
ERBB3	2
GGT7	2
DHX57	2
KIFC2	2
TBC1D1	2
IQGAP1	2
EPHA6	2
PCDHB10	2
AKAP9	2
FEN1	2
WDR72	2
TUBG1	2
SHROOM3	2
ACAA1	2
LRRC7	2
ANK1	2
CASZ1	2
TMEM177	2
CHD4	2
RELA	2
MAP2	2
EIF3L	2
TMEM201	2
SLC12A5	2
PTPRO	2
FAM211B	2
CCDC15	2
DSEL	2
C7orf31	2
MLH3	2
DNAJB5	2
RLTPR	2
INSR	2
NFX1	2
TNFAIP2	2
CLEC16A	2
RASAL2	2
TTC6	2
ARHGEF17	2
TCTN2	2
NRCAM	2
ZMIZ1	2
ZNF462	2
OVCH1	2
GPR125	2
USP22	2
PCSK5	2
FZD6	2
SLC25A12	2
CUX1	2
TBCK	2
ANK3	2
ZNF592	2
GTF3C1	2
EFCAB1	2
RELN	2
CSF1R	2
NF2	2
POM121	2
PCDHGA6	2
PHTF2	2
C2orf16	2
DPP10	2
GOLGA4	2
IWS1	2
SLC22A9	2
SSX5	2
DAPK1	2
SELENBP1	2
CES1	2
AARS	2
ZNF420	2
RBL1	2
PRKAG1	2
CEACAM3	2
HAPLN1	2
HELQ	2
AMZ1	2
PLCE1	2
CEP250	2
TNIP3	2
TRBV7-4	2
TACC2	2
SIDT1	2
CACNA2D1	2
ZNF181	2
ZNF182	2
ARHGAP21	2
IRX5	2
BSN	2
STK26	2
DYSF	2
INSRR	2
YME1L1	2
RBFOX1	2
HNRNPR	2
MEIS2	2
TPCN1	2
IFT140	2
SON	2
UBXN4	2
NUP37	2
NLRP5	2
ADAMTS16	2
TMEM92	2
ZZEF1	2
RANBP6	2
RYR1	2
LTBP1	2
BACE2	2
KIAA0355	2
UBXN7	2
DIDO1	2
AGGF1	2
ADAMTS2	2
ABCC11	2
FRYL	2
AHCYL1	2
OR52E2	2
ATP1A1	2
LOXL1	2
IL1RL2	2
PFKL	2
RALGPS1	2
RPE65	2
SLC35F1	2
C17orf66	2
CMYA5	2
SVEP1	2
NCAPD3	2
LCE2D	2
CREBBP	2
BRINP3	2
ZNF518B	2
C17orf80	2
GAD2	2
PRKDC	2
AP2B1	2
ATXN2	2
PCDH15	2
GCNT2	2
GIGYF2	2
SEL1L2	2
DNA2	2
ANAPC1	2
DMXL1	2
TRIM42	2
GRM1	2
ZNF514	2
LRIG1	2
FRS3	2
BSX	2
BCL6	2
CEP68	2
LPAL2	2
LCE1C	2
SLC5A3	2
PCDHB13	2
DAG1	2
FIGN	2
PCSK2	2
SMG1	2
BNIPL	2
POU2F2	2
LPHN3	2
PROCA1	2
ARHGEF5	2
KIAA1109	2
PTPRC	2
CD14	2
BEST3	2
CDH3	2
CNTROB	2
HOXB1	2
MTUS2	2
CGREF1	2
COL9A1	2
SRCAP	2
OR10Z1	2
ZCCHC6	2
TMEM102	2
PUM2	2
RALGAPB	2
KLHDC7A	2
PLCH1	2
PCDHGB7	2
TEP1	2
AASS	2
CYP27B1	2
FAM57A	2
POTEF	2
C1QL2	2
ATG2A	2
MYLK	2
CSMD2	2
ZNF142	2
PRG2	2
CLSTN3	2
LINGO2	2
F13B	2
SYNCRIP	2
GOLGA2	2
TTI1	2
CYP3A43	2
GRID2	2
LRP2	2
PPP1R9B	2
FER	2
TRPC6	2
DNM2	2
ZNF616	2
ST5	2
ANKLE1	2
MT-ND5	2
CCDC87	2
PCDH17	2
RFX6	2
HTR1D	2
RC3H2	2
SGCD	2
ABCA9	2
CCDC180	2
GPR17	2
FLRT3	2
ALDH1A3	2
SMG7	2
ZNF438	2
ANKRD13A	2
DNAH3	2
FAM53B	2
CPS1	2
ASXL1	2
NFKB1	2
FBXO38	2
RNF8	2
NCAN	2
GRIA4	2
PCDHB5	2
UBTF	2
INADL	2
GCN1L1	2
USP28	2
AUTS2	2
COL27A1	2
CEBPE	2
PZP	2
TMC7	2
LNX1	2
HGF	2
ESPNP	2
L3MBTL1	2
NBAS	2
TAS2R60	2
FAM178A	2
COL22A1	2
SETD2	2
SPTLC1	2
SYNE2	2
VCPIP1	2
NUP214	2
MAGEC3	2
NUP210L	2
PTPDC1	2
PRSS48	2
DNAJC22	2
C16orf59	2
HPS6	2
RPGRIP1	2
ZNF197	2
CSGALNACT2	2
CARD11	2
ANXA13	2
PHF3	2
ATP8B2	2
ZNF148	2
SLC26A8	2
PCDHA4	2
SFR1	2
XIRP1	2
COL15A1	2
CACHD1	2
AFG3L2	2
CDKN1B	2
HSPB3	2
FGG	2
MGAT5	2
SEC31B	2
DCLK1	2
ADAMTS9	2
ZFP69B	2
TUBA3C	2
COIL	2
APOB	2
CFH	2
DHX30	2
FLNC	2
CATSPERG	2
PLCH2	2
DSG2	2
RAPGEFL1	2
NAGA	2
MYT1	2
PBRM1	2
HECTD4	2
PIK3R3	2
TMEM171	2
LYST	2
CCR2	2
CADPS	2
ASPA	2
PCDHB2	2
MYH10	2
C14orf159	2
LGSN	2
ASCC2	2
PARP6	2
SPEN	2
DHTKD1	2
TAF1L	2
CRYBG3	2
FAM155A	2
ADRB2	2
PLEKHH2	2
MANEAL	2
VAV2	2
EPC1	2
CPPED1	2
VPS13D	2
SKIV2L	2
CLASP2	2
EIF2AK3	2
ZNF629	2
ATF7IP	2
FOXK1	2
INTS3	2
TRPM4	2
JAG2	2
TGM1	2
PRKCSH	2
RGPD4	2
VEZF1	2
MOXD1	2
FAM13C	2
DENND5A	2
IKBIP	2
SHCBP1	2
PTPRS	2
TNC	2
ASPM	2
NCKAP5	2
PTPRD	2
CYP4X1	2
PRG4	2
SLC5A12	2
INHBA	2
PLCB1	2
LRRK1	2
XPNPEP1	2
C10orf91	2
SBF2	2
CDH9	2
MBD6	2
NPC1L1	2
UMODL1	2
LIFR	2
DMBT1	2
IL3RA	2
FLT3	2
MAP3K2	2
C4orf21	2
AVPR1A	2
LTF	2
TNN	2
C9orf131	2
KCNU1	2
SIDT2	2
TRRAP	2
FAM71B	2
DDC	2
PRLR	2
ZFYVE26	2
CSH2	2
ZEB2	2
C6orf165	2
DKK1	2
ARHGEF1	2
RNF214	2
REL	2
CCDC135	2
CRTC3	2
AKAP13	2
NEDD9	2
OR5T3	2
RIMS2	2
KIAA1804	2
PAPLN	2
RALGAPA1	2
KSR2	2
HIVEP3	2
COL10A1	2
MFSD5	2
RFX4	2
NAA25	2
ZNF770	2
AGAP1	2
DDR1	2
PEX5L	2
PRAMEF12	2
DNER	2
RRNAD1	2
KDM3A	2
C3orf38	2
HSPG2	2
LRRC37A6P	2
CYP24A1	2
SIN3B	2
KAT6B	2
FBXO10	2
ARMCX2	2
NLRP14	2
DNAJC13	2
GALNTL5	2
XPO5	2
SMCR8	2
DNAJC10	2
PCDHB15	1
SLMAP	1
KCNMA1	1
C10orf90	1
RALYL	1
ATF6B	1
BBOX1	1
KLHL13	1
XDH	1
LRRC41	1
PBX4	1
STOX1	1
C1orf85	1
KCNG1	1
SALL1	1
PTPRR	1
CADM4	1
SLC25A3	1
OTOP2	1
IFT122	1
CHD8	1
LDB3	1
SUMO1	1
GP1BA	1
TMC4	1
UBAC1	1
WISP2	1
XAB2	1
ADAM21P1	1
PRKCG	1
ZBTB12	1
DDX5	1
SLC26A1	1
CCNB1	1
ZEB1	1
ANAPC4	1
CHD9	1
KCNK3	1
KCNK6	1
SEMA4D	1
SLC15A2	1
THRAP3	1
NOSTRIN	1
AK7	1
MAP3K3	1
OR2V2	1
NINL	1
PROSC	1
SLC12A8	1
LONP1	1
IPO9	1
TMEM132E	1
FIBCD1	1
CHD1	1
SYN3	1
SERPINF1	1
RPS6KA5	1
CACNG5	1
EPT1	1
C9orf43	1
DIP2A	1
TAOK3	1
FAM129C	1
RABGGTA	1
BRCA1	1
SLK	1
PRKCB	1
ACSM3	1
C5AR1	1
ZNF623	1
BAZ1B	1
SLCO2B1	1
ROCK2	1
VKORC1	1
SLC25A46	1
UGT2B7	1
PHF20	1
COL1A1	1
SLC8A1	1
FGGY	1
CA11	1
ALDOC	1
NUDT1	1
VGLL3	1
PRDM2	1
SEL1L3	1
CD1A	1
CEP350	1
RAPGEF6	1
ANO5	1
GFPT2	1
OR6C1	1
KCNC1	1
ARHGEF9	1
OR8J1	1
GBP7	1
MFF	1
NOA1	1
STAU2	1
PCDHA13	1
SIAH3	1
CNGA3	1
CTDSP2	1
ROR2	1
WHSC1L1	1
GSTA2	1
ZBTB48	1
FAM174A	1
HTR7P1	1
GRB2	1
EPB42	1
DUS3L	1
HSPD1	1
OR5R1	1
ZNF232	1
GDF10	1
SLC6A7	1
SHBG	1
RARRES3	1
FNDC1	1
PMF1	1
PREP	1
RFX3	1
ENTPD8	1
SYT12	1
MAP3K13	1
BCHE	1
SETDB1	1
CPEB3	1
HCRTR2	1
AIPL1	1
PLCL2	1
HPCA	1
PXDN	1
FCN1	1
TBC1D17	1
FAXC	1
TIMM22	1
LIMD1	1
CD6	1
ZNF534	1
NIPSNAP3B	1
TF	1
TOX3	1
CLCN4	1
COG1	1
CRHBP	1
PWP2	1
USP42	1
RCSD1	1
UQCRC1	1
DDX18	1
CEP120	1
PRR22	1
CDC42EP3	1
MFN2	1
POMT1	1
MTX1	1
CYP1A1	1
SNAPC1	1
ARL16	1
DDHD2	1
OR10K1	1
TTLL4	1
ZNF687	1
MAPK10	1
COX7A2	1
POF1B	1
USP32	1
MAN2B1	1
OR4C13	1
ATF7	1
KDM4B	1
CHRM1	1
NFIL3	1
TM6SF1	1
CIITA	1
EPHA4	1
FANCC	1
GPATCH2	1
ARAP1	1
CDH8	1
ZBTB20	1
IPO13	1
HEPHL1	1
XPC	1
PSG4	1
ANKLE2	1
AGTPBP1	1
SLC9A3	1
HBG2	1
SLC39A5	1
PRR5	1
LILRA6	1
PCSK6	1
DNHD1	1
OVCA2	1
FKBP4	1
LONRF2	1
HCFC1	1
AHI1	1
KIF14	1
GATA1	1
MYEOV2	1
HK3	1
PRPF3	1
CAMSAP1	1
RTCB	1
GLYATL2	1
SH3PXD2A	1
SPINK5	1
KLF4	1
JADE1	1
BTK	1
TJP3	1
RAB38	1
RIC3	1
TNFAIP6	1
RTEL1	1
KCNK10	1
ZNF709	1
FSTL5	1
EXOC1	1
CYP19A1	1
KIF25	1
MTG1	1
ENTPD7	1
CASC4	1
S100Z	1
GPR158	1
CATSPER1	1
SLC4A5	1
ZNF568	1
ITSN1	1
EHBP1L1	1
TNKS2	1
GRIP1	1
MUC2	1
IL23A	1
TCF21	1
R3HDM2	1
WNT6	1
2019-09-12	1
CMA1	1
FST	1
PSD2	1
ZNRF4	1
LXN	1
TLK1	1
TIGD2	1
PREX2	1
KLHL21	1
ASTN2	1
PI15	1
ELAVL2	1
TAB2	1
GPATCH8	1
KIF4A	1
ZMYM5	1
OR11L1	1
FBXL20	1
LIMD2	1
NAB2	1
TMEM189	1
HIST1H4L	1
PECR	1
SHH	1
TYRP1	1
NUP85	1
DPYSL4	1
POLR1A	1
SIRPG	1
PLEKHM3	1
XAF1	1
ENKUR	1
ABCG8	1
XPO4	1
HCAR2	1
SPAG6	1
BDP1	1
APOA2	1
ATP6V0A2	1
KIAA0319L	1
RAB11FIP4	1
SUMF1	1
USH2A	1
C5orf56	1
SEPHS1	1
NEGR1	1
SAT2	1
NUP133	1
KIAA0753	1
GABRE	1
INPP5B	1
PCDHGA5	1
AZGP1P1	1
NT5E	1
NCK2	1
VPS16	1
GK5	1
DNAJC25	1
SIGLEC1	1
SLC9A2	1
ADD1	1
TAL2	1
PARD6A	1
TAF1D	1
KIAA0368	1
SPDYE1	1
CCAR2	1
CMKLR1	1
OR11H4	1
GPR157	1
SCNN1B	1
MCM5	1
BTBD10	1
OR6S1	1
ITK	1
PCDHA12	1
RABAC1	1
YPEL1	1
HRAS	1
FBXL5	1
CPNE9	1
METTL16	1
TRHDE	1
MAP2K4	1
PTPN4	1
ITGB2	1
CSRP2BP	1
CD72	1
KAT5	1
MAP3K6	1
SRRD	1
MAP6	1
SOCS4	1
NYAP1	1
XRCC1	1
CSRNP1	1
PARVB	1
MAS1L	1
PPP6R2	1
CSHL1	1
TBCCD1	1
DMBX1	1
ZBTB41	1
ZBTB7C	1
ITGA2	1
TEX26	1
MAN2C1	1
CEP72	1
THEG	1
ZNF18	1
NRXN1	1
MFI2	1
SGSM3	1
SLC37A1	1
YJEFN3	1
AMER3	1
AGBL1	1
OIP5	1
C19orf44	1
VWA3A	1
GTF2IRD2P1	1
RPAP1	1
IL1RAPL1	1
MAGI1	1
NIPA2	1
GPR160	1
APOBEC3F	1
THEMIS2	1
RAVER1	1
MBD2	1
VPS37B	1
C6orf120	1
PIGT	1
ALAS1	1
CRLF3	1
CLCNKB	1
WDR82	1
SPATA16	1
ZNF3	1
PPP4R1	1
HMGXB4	1
ZC3H14	1
MAN1A2	1
TRIM16	1
CDC40	1
DPP6	1
MKKS	1
STK39	1
ACOX3	1
TRIM6	1
CD109	1
FAM13A	1
HMBS	1
CCDC129	1
ADAMTS12	1
KLHDC1	1
RNF217-AS1	1
AVL9	1
TBC1D16	1
PABPN1	1
SLCO1C1	1
PLXNA4	1
TAAR6	1
OR2T4	1
ASPN	1
KIAA1429	1
KCNH1	1
MCF2L	1
SPEG	1
ACSS3	1
ZNF695	1
STK10	1
AAAS	1
KIAA1045	1
DCDC1	1
PARVG	1
PLBD2	1
ALDH1L1	1
HNRNPH1	1
ADRBK1	1
HOXD8	1
PPP1R15A	1
CITED2	1
CD1B	1
KRT9	1
PCED1B	1
NLGN4X	1
RB1CC1	1
POLR3A	1
EIF4E	1
RPE	1
HEATR5A	1
IMPG2	1
LRRC32	1
EMB	1
SLC35F5	1
HIGD1C	1
ATP2C2	1
CKMT1B	1
PCDHB14	1
SPAG5	1
C12orf55	1
LCE1A	1
FAM8A1	1
TUBB2B	1
UNC119B	1
CR1L	1
RNF31	1
ENTPD6	1
UBN1	1
ERCC4	1
FAM83B	1
ACY1	1
CTNNA1	1
C15orf26	1
CT47B1	1
IRAK2	1
GHITM	1
BLMH	1
SP110	1
DHH	1
AGRN	1
PRMT5	1
FAM171B	1
PRPS1L1	1
IRX4	1
PAK7	1
ETV3	1
KRTCAP3	1
APBB3	1
UQCR10	1
TLE3	1
LRP1	1
RIPK3	1
BIRC6	1
THUMPD3	1
OLFM4	1
ADHFE1	1
EPC2	1
NAGLU	1
TRIM4	1
PADI4	1
CAPNS1	1
SNX18	1
SDF4	1
KLHDC3	1
IPPK	1
AKT2	1
EGFR	1
APPL2	1
TNPO1	1
MRPL13	1
ACOT11	1
AFAP1	1
PACS1	1
OR2H2	1
CYSLTR1	1
TMX3	1
TIAM2	1
ZNF317	1
KLHL38	1
FAM134A	1
DNPEP	1
ZNF763	1
RPL15	1
PRC1	1
HOXC4	1
CFL2	1
RASA2	1
NAP1L5	1
KCNA3	1
IQCJ-SCHIP1	1
IGKV1-27	1
LPIN2	1
ZHX2	1
LRRC49	1
C1orf177	1
MCOLN3	1
LRP8	1
TGFBRAP1	1
AGL	1
ZDHHC20	1
MIR99AHG	1
SRRM5	1
PSD4	1
TMEM181	1
PALMD	1
HOXC10	1
ENPP7	1
VIMP	1
ENPEP	1
PRPF8	1
KIAA1257	1
RPL28	1
TRIM11	1
TBL1XR1	1
SP140	1
PROKR2	1
TACSTD2	1
HBE1	1
TOM1L1	1
BCAT2	1
MFN1	1
CPEB4	1
C11orf80	1
GIF	1
SNX11	1
THBS1	1
SCLT1	1
ABCC5	1
ABL1	1
PTPRG	1
TXNRD1	1
SPATA18	1
DUSP27	1
LILRA1	1
CDC45	1
DAXX	1
FUT11	1
ELMO1	1
USP33	1
FAM184A	1
GPER1	1
ABHD8	1
SCIMP	1
ARF5	1
PRX	1
PIWIL2	1
TARBP2	1
RBM5	1
NCL	1
TUBGCP4	1
GUF1	1
NCOA1	1
ADH4	1
NEURL1	1
CDAN1	1
KIAA0922	1
SYT11	1
TGS1	1
ZBBX	1
FBXL17	1
HTRA1	1
LRMP	1
ZNF585A	1
SLC26A2	1
P2RX2	1
SPATA31C1	1
KIAA0895	1
KANSL3	1
GUSBP11	1
SLC24A1	1
ZNF160	1
ZNF688	1
HDAC11	1
DHX29	1
FAM50B	1
PTPN6	1
DNAH10	1
GRXCR1	1
EN2	1
STPG2	1
TRAV12-2	1
PAN3	1
INHBE	1
MAP3K4	1
FSIP2	1
PDHX	1
HBB	1
MED15	1
TBC1D32	1
ZBED4	1
CLCN3	1
NABP1	1
CANT1	1
RHOJ	1
C16orf93	1
SOX1	1
INTS2	1
SNX22	1
POLR2A	1
FGF10	1
MC3R	1
PHEX	1
POLE	1
TSPEAR	1
FILIP1L	1
SNAPC2	1
TMUB1	1
L3HYPDH	1
SCN7A	1
CATSPERB	1
NADK	1
SGSH	1
DET1	1
ATP6AP2	1
ABHD10	1
TACR3	1
IL10RA	1
KIF1A	1
HERC5	1
SYDE1	1
NHS	1
RNF139	1
DDHD1	1
PCDHGA11	1
NUDT13	1
GPR150	1
LRCH1	1
ZCCHC2	1
CLIP3	1
PRDM5	1
SLC39A10	1
CASKIN2	1
EHD1	1
ILDR2	1
NMUR2	1
KIAA1586	1
SOHLH1	1
KCTD8	1
TRAF3IP3	1
LOC645752	1
MPHOSPH9	1
OR8H2	1
UNC5D	1
CUL7	1
HS3ST2	1
ZNF830	1
MAGEA11	1
SH3BP1	1
ISLR2	1
MAGOH	1
CENPB	1
KLHL26	1
SIM2	1
GJC1	1
C20orf194	1
CELSR2	1
HRC	1
LRG1	1
KIRREL	1
EBNA1BP2	1
CIAPIN1	1
ADCY4	1
HELZ	1
PTPRJ	1
FRMPD1	1
CSTB	1
TET1	1
DMD	1
ZNF668	1
TMEM50A	1
OR6C65	1
FPR2	1
CCNF	1
KLHL5	1
PPM1G	1
ABCB11	1
AKAP8	1
KCNC2	1
SSH3	1
LDLRAD1	1
PLA2G16	1
PER1	1
HDAC10	1
TFEB	1
KLC2	1
RNMT	1
MASP1	1
JAKMIP3	1
AIFM3	1
MICAL1	1
SHOX	1
PCDHGB3	1
RPAP2	1
ASB5	1
CAV2	1
KRT35	1
PPP1R21	1
MED26	1
USP50	1
PREX1	1
AKR7L	1
C17orf78	1
BTD	1
CALD1	1
ST6GAL1	1
APOA4	1
POM121C	1
ZNF689	1
NSMAF	1
RPL31	1
SLC25A51	1
KIAA1462	1
LRRC27	1
ALAS2	1
OR2M3	1
MARS2	1
SFMBT1	1
CNOT3	1
TYW1	1
HIBADH	1
C12orf23	1
PSPC1	1
CD101	1
C16orf70	1
EIF3I	1
PRB4	1
SEC61A2	1
PDE1B	1
DPPA4	1
TAAR8	1
GALNS	1
DOCK7	1
KRTAP9-9	1
PDK3	1
ARHGEF19	1
ZSCAN20	1
MAP1S	1
HIST1H2BO	1
HIST1H4A	1
LPPR5	1
FABP2	1
LBH	1
MYO1D	1
SYNM	1
HSD17B14	1
SAMD4B	1
FAM13B	1
NRD1	1
CHCHD2	1
ATXN2L	1
SESTD1	1
OR52N4	1
KAZN	1
ZNF675	1
CHPF	1
CSNK2A1	1
DDX56	1
PAX5	1
AOX1	1
CYR61	1
LY96	1
EEA1	1
CRB1	1
AMHR2	1
FABP9	1
RELL2	1
MAB21L1	1
MYBBP1A	1
USP8	1
LRRC75A-AS1	1
TRIM5	1
KCNS3	1
MBD1	1
ITGAL	1
SLC38A11	1
PCDHGA3	1
THEMIS	1
SHMT2	1
VWA3B	1
ZBTB40	1
SDHA	1
FOLR3	1
VRTN	1
GPR123	1
BTAF1	1
RCBTB2	1
NRXN2	1
RYBP	1
ACKR3	1
TTC26	1
PSD3	1
CPSF2	1
GBX1	1
ST6GALNAC1	1
GNB3	1
ARL6	1
DUSP8	1
OR12D3	1
FAM174B	1
RAP1GDS1	1
MYB	1
FZR1	1
ESPL1	1
RPTOR	1
CLCN3P1	1
USP30	1
ARHGEF10L	1
GPHN	1
C1orf106	1
HECA	1
ATRX	1
CHST8	1
RNF122	1
FAM65A	1
RYK	1
OR2S2	1
PRDM14	1
NUFIP2	1
ATP6V0D1	1
SLTM	1
POLR1C	1
TRIO	1
ZNF385D	1
NID1	1
TUBGCP3	1
TM9SF1	1
FCRL6	1
ZNF783	1
WEE2	1
ZNF473	1
CAPN3	1
SMARCC2	1
AP1G1	1
AMBRA1	1
POLG2	1
SLC37A3	1
TRMT61B	1
ITLN1	1
DSP	1
ZNF248	1
PTPRE	1
THOC5	1
FBXW8	1
MYO3B	1
L3MBTL2	1
TBC1D31	1
ZNF347	1
GINS3	1
C19orf53	1
FKBP7	1
ATAD2B	1
GPNMB	1
AGAP11	1
PSG8	1
DDX19B	1
EXT2	1
CLN8	1
ACVRL1	1
MECP2	1
PNPLA4	1
FCGR2B	1
TOP3B	1
YBX2	1
ATOH1	1
MAML2	1
ODF1	1
UAP1L1	1
CTDSPL2	1
APCDD1L	1
IGKV1D-8	1
C1orf101	1
SLC16A7	1
FAM192A	1
GALNT13	1
ITGB4	1
CCDC141	1
ZRANB3	1
KRT13	1
ATP6V0B	1
MURC	1
ZBTB38	1
FYCO1	1
ANKRD35	1
C1orf227	1
PLTP	1
RAPH1	1
DUOXA2	1
TBC1D5	1
CTIF	1
MYO6	1
DEFB128	1
RBM24	1
GRB7	1
CEACAM20	1
GLRA2	1
BTN3A2	1
HSPBAP1	1
ATP4A	1
PRTFDC1	1
DNASE1L3	1
SCRN2	1
NEIL3	1
SYNC	1
PTHLH	1
PPP1R8	1
EXO5	1
CCSER1	1
MBTPS1	1
SECISBP2	1
KBTBD6	1
GABRR2	1
XRCC6	1
FAM133B	1
USP16	1
SLC9C1	1
ZIM2	1
HDDC3	1
PLXNB1	1
USP10	1
SND1	1
RNASE2	1
CXXC1	1
LINC00696	1
STAT4	1
FGD4	1
DYNC1LI2	1
MRGPRX2	1
ZMYND8	1
SNRPA	1
GATAD2A	1
GPRASP2	1
OR52I1	1
N4BP2	1
SCN4A	1
FGB	1
POTEE	1
DEGS2	1
EXOSC10	1
ITGA1	1
EPHA5	1
FOLR1	1
OVGP1	1
TCF12	1
PACS2	1
HAL	1
ARL4C	1
UBQLNL	1
ZNF641	1
LSG1	1
PLEKHG2	1
NCEH1	1
RNF113B	1
BAG1	1
MYNN	1
CORO2B	1
PAN2	1
TECR	1
KIFC1	1
POC5	1
ITGA8	1
DCLRE1B	1
TMPRSS6	1
COL4A3	1
SLC6A18	1
PDZD9	1
GPR64	1
CYP4F3	1
RASEF	1
GABRG1	1
RNF103	1
AHCY	1
MAPK9	1
ALG12	1
THSD1	1
RIPK2	1
CNGA1	1
CSTF2T	1
TMEM8A	1
GRHL2	1
IREB2	1
DNAH1	1
ZIC4	1
IGHV1OR21-1	1
LRRC43	1
SELE	1
PROKR1	1
CNR1	1
ABCC4	1
FAR2	1
FAM69B	1
PCDHA11	1
LLGL1	1
DYRK2	1
PIK3C2A	1
IGKV1D-42	1
ARNTL2	1
HUWE1	1
CDH17	1
FAAH	1
POLA1	1
TM7SF2	1
ACCS	1
LEPR	1
ERN2	1
HECW2	1
PDE9A	1
BTBD16	1
PGLYRP2	1
ZNF502	1
SEC14L3	1
SLC22A8	1
EPS8L1	1
FABP3	1
MYBPC3	1
CCNL2	1
ANXA6	1
KRT24	1
MOCS3	1
ANKS1B	1
ZC3H12A	1
PATE2	1
MFSD2A	1
CDH18	1
RAPGEF1	1
TBC1D2B	1
TIFAB	1
NAA20	1
BNIP3P1	1
CPSF3	1
HOGA1	1
SULT1A1	1
[truncated: 2,217 more rows]

## Sheet: Aggressive
Supplementary Table S2 – A comprehensive list of somatic mutated genes in Aggressive PCa obtained from TCGA.
Genes	events
SPOP	29
TTN	27
TP53	18
MUC16	17
HMCN1	13
ATM	13
MUC17	12
KMT2C	12
FOXA1	12
LRP1B	10
SPTA1	10
OBSCN	9
FAT3	9
CSMD3	8
ABCA13	8
CDK12	8
KIF16B	8
FREM2	8
PCDH18	7
AHNAK	7
USH2A	7
KMT2D	7
SYNE1	7
PLCB4	7
PCDHA12	6
HFM1	6
FAM83B	6
ABCA5	6
MACF1	6
FAT2	6
PIK3CA	6
DNAH9	6
DCHS2	6
RP1	6
VPS13D	6
PTPRD	6
CDH23	6
FLG	6
XIRP2	6
GPR98	5
PANX3	5
TNXB	5
SCN11A	5
BRCA2	5
NEURL4	5
FZD4	5
KIAA1614	5
AHNAK2	5
ASH1L	5
CTNNB1	5
MXRA5	5
EPHB1	5
SRCAP	5
MT-ND5	5
BAI3	5
SACS	5
RYR2	5
EYS	5
SALL1	4
FAT4	4
CHD1	4
RAG1	4
KDM2A	4
IGDCC3	4
C7orf60	4
TLK1	4
XPO4	4
GRIN2A	4
DEPDC1	4
KIAA1429	4
SPEG	4
CACNA1C	4
CHD7	4
PDZD2	4
DNAH8	4
TCF20	4
MYH4	4
COL11A1	4
EXT2	4
CACNA1E	4
CHD6	4
PCLO	4
GPR112	4
ZFHX4	4
UNC79	4
GRIN2B	4
SETD5	4
TNS1	4
SMAD4	4
NEB	4
MRGPRX1	4
ZMYM3	4
EPHA3	4
FGA	4
MYCBP2	4
MAGEA6	4
OTOGL	4
PCDHA1	4
ZNF462	4
ABCA7	4
ZFHX3	4
TBC1D2	4
DOCK3	4
EPB41L5	4
TACC2	4
KLHL2	4
FAM214A	4
DYNC1H1	4
PKHD1	4
HSPA8	4
DIDO1	4
IFI16	4
ZFPM2	4
FILIP1	4
LPHN3	4
KIAA1109	4
ARHGAP32	4
SORCS3	4
TRIM28	4
ROS1	4
BRWD1	4
PTEN	4
ZFP28	4
NDST4	4
NPAT	4
APOB	4
MTOR	4
NALCN	4
TAF1L	4
PCDHGA9	4
CSMD1	4
LRRTM1	4
ZNF521	4
DST	4
ARFGEF1	4
UNC13C	4
LRP4	4
VPS13C	4
DIP2A	3
LRGUK	3
TRPM6	3
DGUOK	3
SEL1L3	3
SRRM4	3
PCDHA13	3
MYH6	3
CNOT1	3
PAQR8	3
PSG3	3
MYLK2	3
HDAC3	3
GPR158	3
ITSN1	3
BDP1	3
KDM6B	3
WIF1	3
HRAS	3
ZNF536	3
EPB41L3	3
MME	3
ARID1B	3
KIF1B	3
GPR110	3
ATP11B	3
MYO9A	3
SPANXN1	3
WDFY3	3
EGFR	3
KCNA3	3
SKIV2L2	3
SZT2	3
HCFC2	3
NCOR1	3
ABHD8	3
TRIOBP	3
NCOA1	3
ZBBX	3
PKHD1L1	3
ATP2B4	3
PDE4DIP	3
SCN7A	3
TACR3	3
SLC9C2	3
ETV3L	3
GTF2E2	3
MIA3	3
RGPD3	3
TIGD3	3
TMEM132D	3
SCN10A	3
DOCK7	3
STAB2	3
BRAF	3
UBR4	3
RYBP	3
ERBB4	3
ZAP70	3
TRIO	3
PADI3	3
ZNF230	3
PKD1	3
DIRC2	3
KCNT1	3
NOS1	3
MIR4485	3
UGT2B15	3
SLC12A6	3
ANKRD28	3
EFCAB7	3
SCN4A	3
POTEE	3
MTF1	3
PCNX	3
ZNF518A	3
ARHGEF39	3
LRRIQ3	3
UACA	3
ADAMTS20	3
AQR	3
RBL2	3
CDC20	3
ITPR2	3
F8	3
PPP1R3A	3
USP37	3
DNAH2	3
SLC7A2	3
IRF4	3
KIAA1324L	3
ONECUT1	3
OR5M8	3
IGSF10	3
USP31	3
DSCAM	3
HIST1H2BG	3
BCORL1	3
CD5L	3
ZFC3H1	3
IL6ST	3
RABEP1	3
CHD4	3
MAP2	3
KMT2A	3
TRIM10	3
COL17A1	3
ADAMTS13	3
ATP13A5	3
MALAT1	3
ANK3	3
ARID4B	3
CNOT6L	3
FRAS1	3
MSH3	3
HERC2	3
UTRN	3
TENM4	3
A1CF	3
UBR3	3
OTUD4	3
PPFIA3	3
TRIP12	3
MYH1	3
RBM44	3
EML5	3
SSRP1	3
BAI1	3
ZNF827	3
RUNX1T1	3
GIGYF2	3
GRM1	3
BCL6	3
ACAN	3
TMEM5	3
PSG7	3
PTPRC	3
C1S	3
CGNL1	3
HHEX	3
PCNXL4	3
SAG	3
FLG2	3
BAZ2B	3
BOD1L1	3
WDR7	3
HELB	3
KIF13A	3
NLRP4	3
MKI67	3
IL4R	3
NAV3	3
TGFBR3	3
DNAH3	3
ZC3H4	3
KRT25	3
APC	3
SPTBN4	3
ACTG1	3
ARSF	3
SYNE2	3
SSH2	3
SOGA2	3
MDGA2	3
CMIP	3
ST3GAL1	3
SNTG1	3
MYH9	3
RNF215	3
TTC18	3
MYL6	3
PLXNC1	3
FAM208B	3
NBPF1	3
LRIG3	3
ZNF236	3
ZIC1	3
GMIP	3
PDPR	3
NYNRIN	3
SIPA1L3	3
TMC1	3
VWF	3
DHTKD1	3
GAB2	3
DOT1L	3
RPRD2	3
ATF7IP	3
MAST1	3
PHLDB1	3
ROCK1	3
SLC5A12	3
SBF2	3
MAG	3
PCDH19	3
DOCK10	3
PTH2R	3
TRRAP	3
PTCHD4	3
JMJD1C	3
LILRB5	3
SRSF2	3
CUL9	3
SLITRK1	3
FAM196A	3
CUL2	3
JAK3	3
FREM1	3
ATP10B	3
CTC1	3
HIPK1	3
OR5D13	3
DNAJC13	3
PTCH2	3
HDAC6	3
RALYL	2
PFKP	2
ZNF799	2
IFT122	2
SCAF8	2
CHD9	2
MET	2
SIGLEC8	2
RAB33B	2
OR4A15	2
KRTAP10-4	2
DNAH17	2
STAU2	2
PKDREJ	2
TRAV18	2
MAOA	2
DUS3L	2
POLR2B	2
FNDC1	2
HCRTR2	2
CAMTA1	2
METTL25	2
THADA	2
PIK3CB	2
COG1	2
IRS1	2
TSPAN7	2
DPYD	2
SLITRK4	2
KDM6A	2
NUDT12	2
PDP1	2
OR4C13	2
KDM4B	2
CNTN2	2
DBH	2
TFAP2B	2
CDH8	2
AGPS	2
HP1BP3	2
LTBR	2
TDRKH	2
DOCK11	2
ADRA1A	2
C14orf166B	2
HEATR5B	2
DLEC1	2
MUC15	2
PAQR4	2
CCT4	2
FSTL5	2
ZNF146	2
ZAN	2
CARD9	2
JPH2	2
OSER1	2
PSD2	2
LDLR	2
CPD	2
SNCAIP	2
SSMEM1	2
BICD1	2
SPAG6	2
EMR2	2
ATP6V0A2	2
KIAA0319L	2
DOPEY2	2
PPFIBP1	2
KIAA1551	2
KIAA0753	2
ELF4	2
CD83	2
NOTCH2	2
SLC44A5	2
ZNF750	2
ARHGAP26	2
NR1D2	2
CTCFL	2
SRRD	2
SETBP1	2
AHCTF1	2
ZNF713	2
LAMA3	2
CLCNKB	2
DDX50	2
ADAMTS6	2
IL18RAP	2
WFS1	2
GRIN3A	2
FAM83A	2
ITGA10	2
URB2	2
ZNF676	2
CCDC94	2
FCGR2A	2
EXOC4	2
ATP5A1	2
TELO2	2
DNAH7	2
ANO4	2
C12orf55	2
BBS9	2
ADAM29	2
WDR33	2
PRMT5	2
PRPS1L1	2
GOLGB1	2
GPR97	2
ETV3	2
ANKH	2
BIRC6	2
ITGAD	2
MYSM1	2
FARP2	2
CDK13	2
PRKD2	2
OC90	2
TIAM2	2
FANCM	2
MYT1L	2
DHX38	2
TARS2	2
LRRC49	2
C1orf177	2
C2orf80	2
OR4S2	2
ROBO4	2
COMP	2
ABCC5	2
PTPRG	2
SRGAP1	2
TBX3	2
USP33	2
CABIN1	2
GAS2L2	2
SLC26A2	2
DDX43	2
OR5D18	2
PDE10A	2
MED15	2
CLCN3	2
CASR	2
XRN1	2
ESYT2	2
HEATR6	2
BRE	2
CROCCP2	2
SOX6	2
CIRH1A	2
POLE	2
ZSCAN31	2
FILIP1L	2
CXADRP3	2
L3HYPDH	2
ASIC4	2
PEG3	2
CKAP2L	2
VCAN	2
CNTNAP5	2
PPP6R3	2
JUP	2
SHANK2	2
DAK	2
SULF1	2
CDCA2	2
PDIA6	2
OR4D5	2
ILDR2	2
NEUROD6	2
HFE2	2
FAT1	2
CELSR2	2
SV2A	2
DMD	2
ADCY2	2
KLHL20	2
SSH3	2
ASTN1	2
VWA9	2
LY9	2
TLK2	2
TYW1	2
ANO3	2
ZNF823	2
IGHV1-58	2
ALMS1	2
AMPD2	2
MKS1	2
LONRF1	2
ARHGEF19	2
MYO1D	2
CCDC178	2
ZBTB46	2
ZBTB32	2
AOX1	2
CRB1	2
LTBP3	2
PASK	2
SI	2
TRIM5	2
MBD1	2
ITGAL	2
SLC38A11	2
COL12A1	2
SAV1	2
VRTN	2
GPR123	2
TRIM62	2
TFAP2E	2
RHBDD1	2
HECW1	2
COG7	2
USP30	2
KANK1	2
ACTR3	2
KIF26B	2
OR4P4	2
RPL10A	2
LILRA4	2
SLTM	2
POLG2	2
ITLN1	2
DSP	2
USP20	2
C18orf8	2
FOXR2	2
PSG8	2
ALKBH1	2
ACACA	2
DSCAML1	2
PRDM9	2
IGHV3OR16-8	2
NEK4	2
SYT10	2
MUC3A	2
CNTN4	2
FAS	2
PI4KA	2
VWA8	2
IPO8	2
NOVA2	2
CLK2	2
CCSER1	2
SUPT5H	2
NEFM	2
CHD3	2
STAT4	2
CS	2
ZNF318	2
ECE2	2
PIWIL1	2
UBQLNL	2
ALOX15	2
KIFC1	2
GRIK4	2
GPR64	2
GABRG1	2
ZNF366	2
SNX31	2
DNAH1	2
PCDHA2	2
FAM171A1	2
CCDC81	2
NLRP13	2
LTBP2	2
NOTCH2NL	2
PGBD1	2
PGLYRP2	2
PPP1R42	2
NAA20	2
RIF1	2
ZNF516	2
LARP1	2
KIAA1244	2
SLIT3	2
STAT3	2
ROBO1	2
OR2M7	2
ARSB	2
MPP2	2
SHPRH	2
VPS33B	2
PPP1R16A	2
TIE1	2
CATSPERD	2
PCID2	2
PASD1	2
LRRC15	2
CDH6	2
USP45	2
GRHL3	2
ZNF134	2
KLHL4	2
KCNJ10	2
C1orf87	2
ATG13	2
PER3	2
VARS2	2
SUN2	2
OR6K3	2
KERA	2
FRMPD2	2
KEAP1	2
CCT6P3	2
MTUS1	2
TRAPPC10	2
POLQ	2
TXNIP	2
ZSCAN1	2
IFNA16	2
BRD1	2
KANSL1L	2
IGKV2-30	2
ZCCHC14	2
ACAP1	2
XPR1	2
ACE	2
MGAM	2
CACNA1D	2
ARHGEF11	2
UHRF1BP1	2
CD163	2
HNF1A	2
P4HA2	2
RBM12	2
PCDHB7	2
PEX2	2
EZH1	2
DDIT4	2
CACNB4	2
GMPPB	2
MYO3A	2
GCC1	2
KCNH8	2
DGKI	2
RREB1	2
SP1	2
SLITRK5	2
MYO15A	2
NDST2	2
OR10G8	2
KDM4C	2
SDK1	2
PAMR1	2
C2orf71	2
CEP76	2
AKAP9	2
SACM1L	2
CD63	2
ARAP2	2
C16orf89	2
IGF1R	2
WDR72	2
PKD1L1	2
AEBP1	2
ISM2	2
ANK1	2
FAM98C	2
ACAD10	2
FCRL4	2
LOXL3	2
SLC12A5	2
ERCC6	2
PRMT3	2
FAM83F	2
ZSWIM5	2
SUGP2	2
ITFG1	2
CYP2C8	2
DSEL	2
OFCC1	2
MARK4	2
CTNNAL1	2
CIT	2
TCF7L2	2
WSB2	2
PLEKHS1	2
JAK1	2
ZMIZ1	2
AKT1	2
CASC1	2
COL6A3	2
LINC00518	2
GPRIN3	2
ZBTB44	2
SIX1	2
CDH12	2
ARSE	2
GP5	2
COL6A1	2
HIST2H2BF	2
FRMD7	2
SAMD9	2
LCN2	2
SETX	2
KIF21B	2
THSD4	2
WNK1	2
RELN	2
MFHAS1	2
TRPS1	2
SHKBP1	2
MTMR3	2
SSX5	2
ZNF816	2
VAV3	2
CNTN6	2
LRIG2	2
ACSM2B	2
SMEK2	2
MS4A14	2
MDM4	2
HELQ	2
ZNF638	2
CEP250	2
ZNF492	2
BYSL	2
AHDC1	2
CUBN	2
TLN1	2
ZNF131	2
TRIM33	2
TOP3A	2
PIKFYVE	2
ARHGAP21	2
BSN	2
CYP2C19	2
GPR37L1	2
DSCC1	2
GHR	2
BCLAF1	2
PRDM16	2
SIPA1	2
KL	2
IFT140	2
GUCY2C	2
MICU1	2
ZZEF1	2
DEPDC5	2
RYR1	2
MAPRE1	2
APPBP2	2
PPEF2	2
FAM47B	2
PLD1	2
FCGBP	2
TTLL11	2
MED12	2
MYH2	2
DCSTAMP	2
CPAMD8	2
OR10J3	2
SMPD2	2
CDH24	2
FN1	2
ALPP	2
DGKD	2
ANKRD52	2
SCN1A	2
STRC	2
TRAF2	2
TRGC1	2
KCTD10	2
SNTG2	2
MUC5B	2
CMYA5	2
ATP8B4	2
KCND3	2
RIMBP2	2
SELP	2
CYB5R4	2
ZNF518B	2
OSBPL3	2
RAD54B	2
PLIN3	2
GLI1	2
EPS15	2
GRIA1	2
TRPA1	2
MAP1A	2
TMEM176A	2
NAV2	2
ATP6V1A	2
DNMT3A	2
ORMDL1	2
USP35	2
PRKDC	2
PCDH15	2
GLOD4	2
CEBPZ	2
OR6C76	2
TRPC4	2
PCDH11X	2
HIPK3	2
OR3A1	2
ENPP2	2
PIK3CD	2
ADRA1D	2
NAA15	2
MCTP2	2
ART4	2
PTPN9	2
KRT78	2
FUT8	2
STAT1	2
TARBP1	2
MEGF6	2
CTTNBP2	2
OR4A16	2
BNC1	2
ZNF608	2
PCDHB6	2
MYO1E	2
HRNR	2
ABCC9	2
LRFN4	2
COPS6	2
VPS35	2
ZNF563	2
OR10Z1	2
TSIX	2
COL11A2	2
PCDHA5	2
STK36	2
TEP1	2
NEUROD2	2
G3BP2	2
ISLR	2
PSD	2
POTEF	2
SF3A1	2
FBXW10	2
MYLK	2
AKAP6	2
CSMD2	2
ANKHD1	2
BRD7	2
SLC25A27	2
ATF2	2
CEP85L	2
C10orf137	2
MED13	2
HLA-DQA2	2
ADORA3	2
MMP26	2
MTDH	2
SEMA6D	2
PCDHGA8	2
GTF2B	2
GSDMB	2
LIG1	2
GLDC	2
ZNF616	2
C10orf118	2
ENO1	2
SP3	2
AKAP8L	2
LCP2	2
SEZ6L	2
GLI2	2
DZIP1L	2
FAM71F2	2
KIAA1211	2
SUCO	2
CENPP	2
CPS1	2
ATP10D	2
NRXN3	2
ACACB	2
USP12	2
ANKRD30A	2
PNPLA7	2
IDH1	2
SPHKAP	2
NUP205	2
ACTA1	2
TGFB1I1	2
NCAN	2
TAF15	2
SCMH1	2
GPR139	2
PRPF40B	2
GSTM2	2
PLEKHA6	2
COL27A1	2
MCM8	2
CLASRP	2
ANKS3	2
EVPL	2
SF3B3	2
TEX15	2
XYLT1	2
ZFAT	2
CD1C	2
IGKV1-6	2
RYR3	2
SLC30A9	2
RGMB	2
MAST2	2
CILP	2
PROZ	2
ZBTB34	2
VCPIP1	2
SQRDL	2
ALPK3	2
CDH13	2
B4GALNT4	2
BCAN	2
PLK3	2
LOC101929006	2
PHF3	2
DDX47	2
LCT	2
ZNF148	2
CNOT4	2
SEC16B	2
XIRP1	2
RAB37	2
AFG3L2	2
TRIM31	2
CDKN1B	2
PAK6	2
SEMA3E	2
ATP13A3	2
GPI	2
CACNG7	2
COL21A1	2
NTNG2	2
LRFN3	2
REC8	2
FAM135B	2
DUOX2	2
CFH	2
SIPA1L2	2
ATP7A	2
TTBK2	2
TRIM43	2
MTTP	2
GZMK	2
PARP14	2
KIAA1549L	2
HECTD4	2
RNF20	2
IFIT2	2
NPAP1	2
F11	2
PFN2	2
TENM1	2
THTPA	2
FES	2
MIIP	2
GABRB1	2
SGOL1	2
CRB2	2
ZNF281	2
REG1P	2
SNX4	2
PDE8A	2
PCDHB2	2
ZRANB1	2
CYC1	2
DISP1	2
CHAT	2
KYNU	2
KIF5A	2
SPEN	2
KANSL1	2
PYHIN1	2
PDS5B	2
ABCB5	2
KIAA2026	2
MAN2A1	2
CLCA2	2
COQ3	2
FCAMR	2
KIR3DL1	2
TRIM9	2
GLI3	2
VPS13A	2
KAT6A	2
BCOR	2
TYRO3	2
HYDIN	2
PEX6	2
SKIV2L	2
IL12A	2
LAMC1	2
EIF2AK3	2
PVRL2	2
PRAMEF11	2
LMTK2	2
FAM151A	2
KDM3B	2
EIF4G1	2
FAM179A	2
C11orf30	2
HSP90AA1	2
SLC4A10	2
ADGRG6	2
PARP1	2
ZC3H13	2
PHACTR4	2
GAPVD1	2
UHRF1BP1L	2
PCDHGA2	2
MSL2	2
MOXD1	2
MYLIP	2
PHIP	2
NBEAL2	2
NPHP4	2
ASPM	2
NCKAP5	2
PLXNA2	2
KRIT1	2
KRT27	2
MOSPD3	2
TG	2
NUP188	2
MTG2	2
LAMB1	2
DNMT1	2
MBD6	2
MGA	2
CACNA1A	2
LIMCH1	2
SCN2A	2
TSHZ3	2
CAD	2
HOOK2	2
MTMR7	2
TRPM1	2
SRSF1	2
TMEM71	2
AVPR1A	2
USP34	2
PLA2G4F	2
PCDH10	2
CA2	2
SMOC1	2
OR5A1	2
MROH9	2
TTLL3	2
WSCD2	2
CHRM2	2
PRRC2A	2
INPP5D	2
ABCA4	2
SDHC	2
MPDZ	2
GBF1	2
IL16	2
SERPINE1	2
BRWD3	2
ATP6V1C2	2
IFT81	2
OR10H3	2
PCDHB1	2
MYH8	2
C19orf57	2
HHIP	2
ALS2CL	2
DYRK1A	2
RHOBTB3	2
CDC42BPB	2
OR4C11	2
FRG1B	2
ADCK3	2
TJP2	2
PAPLN	2
NNT	2
TTC17	2
IRF8	2
MAP7D3	2
RBM27	2
ADAMTS10	2
PRDM15	2
BCL11A	2
ADAM20	2
GPR87	2
ZNF770	2
PTGS1	2
CTNNA2	2
ZNFX1	2
GPA33	2
DNER	2
RANBP2	2
RETSAT	2
ZNF845	2
ZNF33A	2
HSPG2	2
CP	2
COL6A6	2
DNAH5	2
LRRC3B	2
FMN2	2
SCN5A	2
VAV1	2
KAT6B	2
FANCB	2
VHL	2
DACT1	2
ERCC2	2
VPS13B	2
DCLRE1C	2
TTC30A	2
SMCR8	2
GRIP2	2
MMP9	2
MSRB1	1
ELMO2	1
ABCA3	1
FEZF1	1
PCDHB15	1
ABRA	1
CMTR2	1
PKNOX2	1
NARG2	1
APBB2	1
MEFV	1
KLHL13	1
ABCB7	1
STOX1	1
DECR1	1
OTOP2	1
ZNF646	1
OR2K2	1
ESYT1	1
LMAN1	1
GALNT3	1
CHD8	1
NTRK1	1
CNGB1	1
MYO9B	1
CCNI	1
FAM134B	1
CRNKL1	1
KLHL14	1
PRKCG	1
TRIM74	1
OR5L1	1
ZEB1	1
PARN	1
CCDC28B	1
FGR	1
EPN2	1
XK	1
PDE1C	1
THRAP3	1
LYAR	1
CCT8L2	1
BANK1	1
OR2V2	1
GRM2	1
SLC12A8	1
TNS3	1
FER1L5	1
KNDC1	1
LRRN1	1
IPO9	1
TMEM132E	1
ZFYVE1	1
MRPL1	1
SCYL3	1
SORL1	1
TEAD1	1
SNX33	1
PTCD3	1
NAT10	1
CTAGE5	1
TMEM184A	1
RPS6KA5	1
MAPKAPK2	1
NMNAT1	1
ITGA3	1
BRCA1	1
CYP2D6	1
SLC26A10	1
LPAR4	1
TMEM180	1
RUNX3	1
ACSM3	1
CDK20	1
NOL8	1
USP6NL	1
BBS12	1
TEK	1
SLC25A46	1
CD160	1
PHF20	1
EED	1
PDCD5	1
SLC8A1	1
HES1	1
ALDOC	1
RBM17	1
ZNF212	1
MANEA	1
VGLL3	1
ZNF83	1
PRDM2	1
CEP350	1
FAM73A	1
SHROOM1	1
GFPT2	1
KCNC1	1
OR8J1	1
GPR55	1
MFF	1
NOA1	1
SLFN12	1
CHRAC1	1
MFSD8	1
CCNY	1
DUSP4	1
PODN	1
GPR78	1
ROR2	1
GSTA2	1
TM4SF4	1
ANGPT4	1
DSTN	1
CCDC41	1
GYPC	1
FRS2	1
NR2E3	1
RFXAP	1
C9orf139	1
ALG2	1
PLEKHG4	1
EPB42	1
HIST1H2AD	1
PIWIL3	1
OR5R1	1
KLHL36	1
BANF2	1
GCC2	1
PLXNA1	1
PMF1	1
CD82	1
PMM1	1
SERPINE3	1
BCHE	1
KLHL30	1
IL1F10	1
PPM1A	1
SLC24A5	1
INTS1	1
MMP16	1
C3orf56	1
DRD3	1
SAMSN1	1
OR4M2	1
C4orf29	1
SNX19	1
SEC14L1	1
CHFR	1
PXDN	1
FCN1	1
BIRC7	1
TIMM22	1
TRAV2	1
ZNF35	1
ERBB2IP	1
CD6	1
TF	1
FTMT	1
CRHBP	1
FBXO24	1
MYBPC1	1
DNAH11	1
SLC9A9	1
F7	1
SLC13A4	1
ADAM23	1
POLG	1
TFR2	1
SPTBN1	1
CDC42EP3	1
ZSCAN32	1
ATR	1
SNAPC1	1
IGLV3-25	1
TACR1	1
GBGT1	1
SNX25	1
IGSF11	1
UNC13B	1
MYO5C	1
CACNB1	1
USP32	1
QKI	1
MED27	1
NCAM1	1
MAN2B1	1
FERMT3	1
LRRTM3	1
AHCYL2	1
IZUMO2	1
PEX16	1
C17orf85	1
NFIL3	1
SPG20	1
CAPN12	1
COX10	1
GPATCH2	1
MRPL15	1
KCNQ5	1
QRICH1	1
HEPHL1	1
XPC	1
ARHGAP15	1
PSG4	1
ANKLE2	1
NBPF3	1
NOP58	1
LILRA6	1
PCSK6	1
RPRD1B	1
STAT5A	1
CCDC172	1
IGLV2-23	1
DNHD1	1
FKBP4	1
SF3A3	1
GIPR	1
HCFC1	1
NCR2	1
DEFB125	1
ACTR5	1
KIF14	1
C10orf99	1
TRMT6	1
DUSP18	1
PSMD5	1
C17orf53	1
PTPRH	1
ATP10A	1
E4F1	1
XCR1	1
IRX3	1
RBM6	1
SH3PXD2A	1
SPINK5	1
SH2D2A	1
KLF4	1
KLKB1	1
OPA3	1
JADE1	1
KRCC1	1
TAGAP	1
CLCA1	1
KIF19	1
HAPLN4	1
HID1	1
GOT2	1
PTGES3L-AARSD1	1
ZCCHC12	1
RIC3	1
GPBP1L1	1
NFYC	1
PPARGC1A	1
GGN	1
OTOA	1
EXOC1	1
ETFA	1
BRD4	1
KLHL6	1
KIF25	1
HOXB5	1
MTMR6	1
ZNF324	1
GJB5	1
SOX9	1
TTC13	1
KIAA0226L	1
CENPJ	1
TNRC18	1
VRK2	1
CATSPER1	1
ZNF568	1
EHBP1L1	1
ADCY3	1
MRTO4	1
CXorf23	1
APBA2	1
MUC2	1
CADPS2	1
TMEM248	1
MYF5	1
TCF21	1
SRMS	1
C5	1
TRIM45	1
MYCBPAP	1
ANKRD26	1
ATP2B2	1
RGS20	1
VWCE	1
MTMR12	1
ABCC12	1
PREX2	1
ASTN2	1
C2orf61	1
TAB2	1
SIX2	1
TANC2	1
PGM1	1
SNRPC	1
LOC101927060	1
TANK	1
OR11L1	1
XKR9	1
DNAJB4	1
FAM193A	1
NAB2	1
TMEM189	1
LRP5L	1
PCDHGA10	1
ATP5H	1
TYRP1	1
POLR1A	1
TSHZ1	1
TERF2	1
CASP1	1
CD8A	1
ISCU	1
SULT1C3	1
ICA1L	1
HAUS4	1
ARHGAP25	1
CA9	1
TPTE2	1
OTUD7A	1
OR2M2	1
KALRN	1
VAX1	1
GPR174	1
SECTM1	1
OR8K3	1
NAA60	1
B2M	1
SUMF1	1
LPPR4	1
NRAP	1
TAOK2	1
SEPHS1	1
C10orf53	1
YTHDC2	1
IGHV3-21	1
MCM10	1
TCF19	1
NUP133	1
RMDN3	1
INPP5B	1
GABRE	1
GCM1	1
CACNG2	1
TLR5	1
ERMARD	1
NCSTN	1
VPS16	1
SIGLEC1	1
CEP164	1
ADD1	1
CCDC144A	1
ACLY	1
TRAIP	1
FKBP5	1
KIAA0368	1
STRN3	1
TYMS	1
TMOD2	1
OR52A1	1
DGKQ	1
SCNN1B	1
CSNK2A2	1
BTBD10	1
CUL3	1
KMT2B	1
ZNF551	1
CPNE9	1
MAP2K4	1
WSB1	1
SOCS4	1
MAP6	1
MAS1	1
LAMA1	1
PPP6R2	1
APOL1	1
RTP1	1
CDH11	1
NDC80	1
DMBX1	1
ITGA2	1
LIPT1	1
ACTRT3	1
TEX26	1
KANK4	1
MAST4	1
MFI2	1
NR4A3	1
SGSM3	1
FOLR4	1
SUPT16H	1
MUS81	1
ZNF839	1
C22orf23	1
PARK2	1
GPR124	1
TMEM132A	1
C19orf44	1
NELL2	1
MCAT	1
SPIC	1
BAIAP2L2	1
DPY19L2P2	1
EPN1	1
NLRP9	1
VCP	1
PCSK9	1
THEMIS2	1
SLC14A2	1
LZTS3	1
SLC11A1	1
SP4	1
TNFAIP3	1
PSRC1	1
KIF5C	1
MATN4	1
GBP4	1
PKP2	1
CDH20	1
CA12	1
CHDC2	1
LRRFIP1	1
PPP4R1	1
SEC61A1	1
IKBKAP	1
SNW1	1
RERGL	1
KRT86	1
GALNT10	1
SLAMF6	1
DPP6	1
MMP24	1
ZNF846	1
GRID1	1
SMURF2	1
CR1	1
SLC22A3	1
FAM13A	1
EBP	1
ACER3	1
ADAMTS12	1
KLHDC1	1
RNF217-AS1	1
AVL9	1
ZNF287	1
DPPA2	1
C11orf57	1
RFK	1
ATG4A	1
ZFYVE9	1
FOXG1	1
MAGEA10	1
PROC	1
DNAJB11	1
GBA2	1
OR2T4	1
ADGRG1	1
ASPN	1
ZNF165	1
USP38	1
VNN3	1
ANXA2	1
MCF2L	1
STK24	1
ACSS3	1
SSX3	1
KIAA1045	1
ABCD3	1
PTPN23	1
NEU2	1
CCSER2	1
INTS7	1
PLBD2	1
AP1S3	1
ASB4	1
ALDH1L1	1
SLC23A1	1
SLC12A7	1
THAP4	1
MDC1	1
METTL18	1
STARD8	1
FOXP2	1
NLGN4X	1
GDPD4	1
POLR3A	1
PCDH12	1
TMEM255B	1
OR6B2	1
TRMT1	1
MMP3	1
BPIFB1	1
URGCP	1
AXL	1
RINT1	1
PCDHB14	1
SHE	1
F13A1	1
PIK3C2B	1
XPO6	1
C6orf89	1
USP15	1
CR1L	1
RNF31	1
SLC5A7	1
HAUS1	1
PPP5C	1
IFT172	1
IRAK2	1
CT47B1	1
BLMH	1
OCM2	1
SP110	1
TAS2R4	1
SH3BP2	1
SH3TC2	1
CEP290	1
PRPH2	1
DCAF4	1
PSMB11	1
CEP63	1
ACR	1
ALOX5AP	1
LRP1	1
C5orf51	1
API5	1
MOV10L1	1
POLR1B	1
TACC1	1
SH3PXD2B	1
C20orf85	1
ASIC5	1
SERPINI1	1
PADI4	1
NLK	1
SNX18	1
FASTKD5	1
NETO1	1
KLHL15	1
POTEC	1
IZUMO1	1
TESPA1	1
SESN1	1
OR5L2	1
GBE1	1
ZNF285	1
RASGEF1B	1
METTL6	1
MAPKAPK3	1
TRBV2	1
PACS1	1
ZFP36L1	1
DPY19L2P1	1
TMX3	1
OR4C3	1
ZNF317	1
CHD2	1
NKX3-1	1
FZD5	1
KLHL38	1
FAM134A	1
ERBB2	1
ADAMTS8	1
HOXC4	1
RMDN1	1
NEO1	1
CEACAM5	1
UGT1A7	1
STAG1	1
PDP2	1
2019-09-02	1
SLITRK3	1
MCOLN3	1
TAGLN3	1
CHRDL2	1
FAHD2A	1
CNTN1	1
MASP2	1
ZNRF3	1
GPATCH3	1
AGL	1
BBS4	1
PSD4	1
KIAA1377	1
CCNB1IP1	1
HS6ST1	1
ITPKB	1
MEOX2	1
TTL	1
STK31	1
TTC39B	1
STAT5B	1
C14orf79	1
FAM71E1	1
PSMD6	1
AKAP3	1
SHISA4	1
OR4D6	1
CCDC17	1
TCERG1	1
KRT16	1
TBL1XR1	1
KLF17	1
CDR1	1
FBLN2	1
AWAT2	1
HBBP1	1
CPEB4	1
RAB4A	1
BCKDHA	1
FAM134C	1
GIF	1
MOCOS	1
CMTR1	1
TNFRSF21	1
SLC16A4	1
TMPRSS7	1
CALCR	1
CCNE2	1
LILRA1	1
MKL2	1
CDC45	1
BTBD11	1
DCAF4L2	1
ELMO1	1
UNC13A	1
CCDC136	1
BARHL1	1
SLC5A10	1
SLC3A2	1
PRX	1
IER5	1
MTHFD1L	1
UVSSA	1
HIST1H3C	1
AMDHD1	1
MCM2	1
GRPR	1
HIPK4	1
SYT11	1
MCM4	1
OR2A25	1
LRMP	1
IFT88	1
MCC	1
P2RX2	1
SPATA31C1	1
CHST12	1
P2RY10	1
STAU1	1
SLC24A1	1
ARHGAP5	1
ZNF160	1
C3orf79	1
CETP	1
HDAC11	1
PLXNB2	1
ILDR1	1
DNAH10	1
CACNB2	1
DGCR14	1
METAP2	1
NUMB	1
STPG2	1
TM9SF2	1
NSFL1C	1
TBC1D32	1
MTA1	1
ITGAX	1
CDC37	1
MT-CO1	1
SPATA6L	1
GPR84	1
ZNF99	1
SRPX	1
LRP12	1
MBNL3	1
ZFYVE16	1
POTEM	1
DDX17	1
CAMTA2	1
TBC1D22A	1
PLEKHA2	1
TMUB1	1
ESRP1	1
ZNF559	1
NADK	1
SGSH	1
TNFRSF18	1
TRPM3	1
ZMYM4	1
TMEM243	1
CAPSL	1
AOC4P	1
CA8	1
NPIPB4	1
IL36RN	1
RSPRY1	1
ARG2	1
LEKR1	1
ICAM3	1
DDHD1	1
ZNF594	1
MAN2B2	1
EMR3	1
SLC41A1	1
CHP1	1
ELOVL1	1
KCNV1	1
ACP1	1
PTGFRN	1
NBEAP1	1
KIAA1586	1
DAGLA	1
SCAF1	1
SOHLH1	1
KCTD8	1
GPR32	1
CHCHD6	1
LSR	1
MIS12	1
UNC5D	1
CD8B	1
DIO1	1
EIF2B1	1
FAM27L	1
TBC1D15	1
MAGEA11	1
ISLR2	1
ARPC5L	1
ERMN	1
KLHL26	1
KIRREL	1
GPC3	1
HOXC11	1
ADCY4	1
ZMIZ2	1
FRMPD1	1
MPEG1	1
ZNF668	1
STAMBP	1
ARHGAP36	1
FPR2	1
KLHL5	1
RPP25L	1
ABCB11	1
PPM1G	1
FZD3	1
CDH19	1
CCBE1	1
TAAR1	1
DLG5	1
SAGE1	1
PER1	1
SMARCAD1	1
ATG12	1
BMI1	1
SH3RF1	1
MASP1	1
JAKMIP3	1
SHOX	1
BOLA3	1
SEMA3F	1
MED26	1
BCL6B	1
DUS1L	1
KRT33A	1
CHRM3	1
DDO	1
DCHS1	1
CPE	1
C17orf78	1
IGSF6	1
CD200R1	1
ADNP	1
RFFL	1
VIPAS39	1
GSTM5	1
NIPAL1	1
ST6GAL1	1
ZNF404	1
ZNF689	1
NSMAF	1
IL9	1
HMGCS1	1
NLRP12	1
TSTD2	1
OR2M3	1
CTSO	1
SH3GL2	1
DHRS1	1
COL24A1	1
DEK	1
PSMA6	1
C4BPA	1
SORBS3	1
DOPEY1	1
DCN	1
DNTT	1
GSE1	1
PRB4	1
UBAP2	1
CDKN2AIPNL	1
CKMT2	1
NBPF14	1
IGHV1OR15-9	1
TPTE2P6	1
FBXO6	1
MYLK3	1
CEP128	1
NXPE3	1
LRIT3	1
ZSWIM3	1
ZNF804A	1
COMMD6	1
FUT2	1
TAAR8	1
SERPINB3	1
PDK3	1
OR4L1	1
TPR	1
ABCC8	1
MAP1S	1
HIST1H2BH	1
TTC4	1
HIST1H4A	1
BNC2	1
OR2T6	1
SLC45A1	1
GOT1L1	1
WDR3	1
[truncated: 2,781 more rows]
