# Supplementary material for: Mapping the Germline and Somatic Mutation Interaction Landscape in Indolent and Aggressive Prostate Cancers
Source: J Oncol. 2019 Nov 13;2019:4168784. doi: 10.1155/2019/4168784 (PMC6878815; doi:10.1155/2019/4168784)
Supplement: Supplementary Materials — Supplementary Table SA: a comprehensive list of single-nucleotide polymorphisms (herein called genetic variants) and genes associated with increased risk of developing prostate cancer and published GWAS reports denoted by the PubMed ID and actual reference from which the data were extracted. Supplementary Table S1A: a complete list of somatic mutated genes found to be significantly differentially expressed in indolent (sheet-1) and aggressive (sheet-2) tumors matched with controls. Supplementary Table S1B: a complete list of nonsomatic mutated genes found to be significantly differentially expressed in indolent (sheet-1) and aggressive (sheet-2) tumors matched with controls. Supplementary Table S2: a comprehensive list of somatic mutated genes in indolent (sheet-1) and aggressive (sheet-2) PCa obtained from TCGA. Supplementary Table S2A: a complete list of somatic mutated genes found to be significantly differentially expressed in only indolent PCa, only aggressive PCa, and both tumors. Supplementary Table S1: a complete list of significantly differentially expressed somatic mutated genes distinguishing patients with indolent PCa from patients with aggressive PCa. Supplementary Table S3A: a complete list of germline mutated genes significantly associated with indolent PCa. Supplementary Table S3B: a complete list of germline mutated genes significantly associated with aggressive PCa. Supplementary Table ISN4: molecular networks enriched with germline and somatic mutations in indolent PCa. Supplementary Table ISN5: molecular networks enriched with germline and somatic mutations in aggressive PCa. [file 4168784.f1.zip › 4168784.f1/Supp_Table_S2A.xlsx]

## Sheet: Indolent_1308
Supplementary Table S2A – A comprehensive list of 1308 significantly differentially expressed somatic mutated genes in Indolent PCa matched with controls.
Genes	Cytoband	Indolent_logFC	Indolent_p-value	Indolent_FDR	Somatic_Indolent
CHD7	8q12.2	-0.377837	0.00016772	0.000481799	6
FZD2	17q21.31	0.707131	2.03e-06	8.52e-06	6
ARID1A	1p36.11	-0.298566	5.18e-05	0.000164936	5
CNTNAP1	17q21.2	0.483069	0.00195323	0.0044691	5
FOXP1	3p13	-0.441369	9.81e-10	7.82e-09	5
HERC2	15q13.1	-0.164305	0.0239246	0.041766	5
MDN1	6q15	-0.253786	0.00494062	0.0102494	5
PKHD1	6p12.3-p12.2	0.750136	0.019629	0.0350813	5
PLEKHG1	6q25.1	0.576732	0.000222092	0.000621991	5
TP53	17p13.1	-0.302671	0.00717872	0.0142738	5
EHHADH	3q27.2	-0.475313	0.00878397	0.0170894	4
HAS2	8q24.13	0.887363	0.000101147	0.000302932	4
KDR	4q12	0.662945	4.55e-05	0.000146859	4
LGR5	12q21.1	0.918328	8.29e-05	0.000252289	4
LY75	2q24.2	1.01492	5.71e-09	3.91e-08	4
MED1	17q12	-0.216131	0.00202473	0.00461779	4
NRP2	2q33.3	1.10374	1.12e-10	1.1e-09	4
PAPPA	9q33.1	0.767927	1.13e-06	4.97e-06	4
PPP2R2B	5q32	1.50471	7.24e-16	2.17e-14	4
ABCC10	6p21.1	0.15738	0.00730299	0.0144917	3
ADAM2	8p11.22	-4.16851	9.37e-18	4.22e-16	3
AMFR	16q13	0.292883	5.73e-07	2.66e-06	3
APBA1	9q21.12	-0.422347	9.22e-05	0.000278097	3
ARNT2	15q25.1	-0.237967	0.0276315	0.0473668	3
CAMSAP3	19p13.2	-0.692272	9.57e-14	1.81e-12	3
CBX4	17q25.3	-0.651388	1.11e-11	1.33e-10	3
CLK3	15q24.1	-0.140054	0.00379677	0.0081121	3
COPA	1q23.2	-0.213686	0.00249845	0.0055747	3
DAAM2	6p21.2	1.29788	1e-11	1.22e-10	3
DIP2B	12q13.12	-0.613423	5.91e-13	9.39e-12	3
DPYSL3	5q32	0.972998	6.28e-12	8e-11	3
DYNC1H1	14q32.31	-0.18162	0.00154523	0.00361502	3
ECM2	9q22.31	0.420392	0.00641144	0.0129069	3
FAM135B	8q24.23	0.8768	0.0104725	0.0199924	3
FLRT2	14q31.3	0.587732	0.00298527	0.00653744	3
GATA6	18q11.2	0.332412	0.0240816	0.0420043	3
HEXDC	17q25.3	-0.362629	0.00147397	0.00346414	3
KIF1B	1p36.22	-0.258409	0.000709958	0.0017878	3
KLHL42	12p11.22	0.479433	1.22e-11	1.45e-10	3
LMO7	13q22.2	-0.381748	0.00133507	0.003168	3
LRRK2	12q12	0.98035	1.33e-08	8.47e-08	3
MAML3	4q31.1	-0.582312	2.72e-12	3.72e-11	3
MAN2A1	5q21.3	-0.283371	0.00647309	0.0130182	3
MAP3K12	12q13.13	0.685018	5.26e-10	4.46e-09	3
MEGF8	19q13.2	-0.203053	0.0145581	0.0268276	3
METTL3	14q11.2	-0.469338	3.63e-13	6.04e-12	3
MOAP1	14q32.12	-0.183763	0.00442497	0.00930328	3
MYOM1	18p11.31	1.05933	4.67e-06	1.83e-05	3
NES	1q23.1	0.710092	3.14e-06	1.28e-05	3
NOVA1	14q12	0.617391	0.00113677	0.00273406	3
OSBPL10	3p23	0.337392	0.00546892	0.0112154	3
PLCG2	16q24.1	0.495684	0.000204124	0.000575433	3
PTK7	6p21.1	-0.306603	0.0185026	0.033304	3
RAI14	5p13.2	0.511561	5.31e-07	2.48e-06	3
ROBO2	3p12.3	1.15365	2.68e-08	1.62e-07	3
SEMA4C	2q11.2	0.164933	0.0212094	0.0374877	3
SIK3	11q23.3	0.307569	6.24e-06	2.38e-05	3
SLFN11	17q12	0.769857	1.09e-06	4.78e-06	3
SLIT1	10q24.1	-3.24217	1.26e-27	4.01e-25	3
SPAG9	17q21.33	0.23868	0.00028129	0.000768399	3
SPTB	14q23.3	0.631481	0.00518584	0.0106812	3
SRRM2	16p13.3	-0.343283	1.79e-06	7.57e-06	3
STAC2	17q12	2.11372	6.17e-10	5.15e-09	3
STIL	1p33	-1.16131	4.84e-21	4.46e-19	3
TMCC2	1q32.1	0.652391	2.68e-06	1.1e-05	3
TMPRSS2	21q22.3	-0.869666	1.06e-05	3.89e-05	3
TRIP10	19p13.3	0.68206	1.54e-12	2.23e-11	3
UPF1	19p13.11	-0.303558	7.52e-10	6.15e-09	3
ZKSCAN5	7q22.1	0.158454	0.000408816	0.00108242	3
ACBD5	10p12.1	-0.248403	0.0012637	0.00301534	2
ADAM9	8p11.22	-0.284617	0.0272624	0.0468168	2
ADCY1	7p12.3	-1.19345	4.11e-09	2.9e-08	2
ADCY10	1q24.2	-0.608879	0.000171396	0.000491134	2
AGAP1	2q37.2	-0.470387	1.23e-08	7.87e-08	2
AHCYL1	1p13.3	0.171317	0.00173398	0.00400926	2
ALDH1A2	15q21.3	1.25531	3.41e-10	3.01e-09	2
ALDH1A3	15q26.3	-1.37401	5.04e-17	1.94e-15	2
APBB1	11p15.4	0.819302	2.21e-14	4.78e-13	2
ARHGEF1	19q13.2	-0.149024	0.0169955	0.0308503	2
ARHGEF17	11q13.4	0.691471	8.63e-10	6.96e-09	2
ARHGEF5	7q35	-0.264504	4.83e-05	0.000154629	2
ARMCX2	Xq22.1	0.583637	0.000228514	0.000638328	2
ASPA	17p13.2	1.86517	1.11e-14	2.56e-13	2
ASXL1	20q11.21	-0.172507	0.00416534	0.00881474	2
ATL2	2p22.2-p22.1	0.337169	5.72e-06	2.21e-05	2
ATP7B	13q14.3	-0.88606	5.4e-12	6.97e-11	2
ATXN2	12q24.12	-0.376904	4.17e-06	1.66e-05	2
B3GNT4	12q24.31	-0.485855	0.000308392	0.000837467	2
BACE2	21q22.2-q22.3	-0.584318	0.000139327	0.000406446	2
BEST3	12q15	-0.62819	0.00276247	0.00609808	2
BNIPL	1q21.3	1.89237	1.08e-16	3.86e-15	2
C16orf59		-0.912286	1.14e-11	1.38e-10	2
C17orf80	17q25.1	0.251204	1.99e-07	1.01e-06	2
C7orf31	7p15.3	1.1006	2.13e-14	4.63e-13	2
CACHD1	1p31.3	1.0978	6.66e-11	6.86e-10	2
CARD11	7p22.2	0.575824	0.000825193	0.00204494	2
CCDC15	11q24.2	-0.287683	0.00734358	0.0145654	2
CDH3	16q22.1	0.545905	0.00236737	0.00530729	2
CDK12	17q12	-0.215402	0.0111082	0.0210882	2
CEP68	2p14	0.57829	5.11e-13	8.22e-12	2
CGREF1	2p23.3	-2.26321	5.67e-37	1.16e-33	2
CHD4	12p13.31	0.115205	0.0130559	0.0243334	2
COL10A1	6q22.1	-2.66527	7.61e-14	1.46e-12	2
COL7A1	3p21.31	0.5263	0.00515531	0.0106254	2
COL9A1	6q13	1.46002	1.56e-05	5.52e-05	2
CPPED1	16p13.12	0.414575	2.7e-05	9.15e-05	2
CPS1	2q34	0.870204	0.00894891	0.0173736	2
CRTC3	15q26.1	0.272189	2.12e-06	8.86e-06	2
CSF1R	5q32	0.35032	0.0154433	0.0283004	2
CYP24A1	20q13.2	1.54211	0.000243744	0.000675546	2
CYP4F12	19p13.12	1.20374	1.07e-05	3.91e-05	2
DAG1	3p21.31	-0.220174	0.000513799	0.00133262	2
DENND5A	11p15.4	0.431174	2.04e-09	1.53e-08	2
DHX30	3p21.31	-0.141696	0.00119932	0.00287362	2
DIP2C	10p15.3	0.289364	2.83e-05	9.57e-05	2
DLG4	17p13.1	0.968087	4.21e-14	8.55e-13	2
DMBT1	10q26.13	1.32389	0.000333203	0.000898688	2
DMXL1	5q23.1	-0.463124	0.00209995	0.0047722	2
DNAH7	2q32.3	-0.425659	0.00261206	0.0057987	2
DNAJB5	9p13.3	1.18265	1.07e-13	1.98e-12	2
DNAJC10	2q32.1	-0.608472	6.33e-10	5.26e-09	2
DSG2	18q12.1	-0.323428	0.00760365	0.0150279	2
DTNA	18q12.1	0.99691	9.28e-08	5.04e-07	2
DYSF	2p13.2	0.671116	6.13e-06	2.35e-05	2
EFCAB1	8q11.21	1.33326	3.12e-08	1.86e-07	2
FAM13C	10q21.1	-0.531457	0.00229517	0.00516616	2
FAM57A	17p13.3	-0.342593	0.000525309	0.0013598	2
FBXO10	9p13.2	-0.297198	4.83e-06	1.89e-05	2
FEN1	11q12.2	-0.235637	0.00234241	0.00525515	2
GGT7	20q11.22	0.388384	0.00507249	0.0104859	2
GIGYF2	2q37.1	-0.131417	0.0256291	0.0443842	2
GPCPD1	20p12.3	0.43328	5.29e-07	2.47e-06	2
GPR17	2q14.3	0.464884	0.0198729	0.0354765	2
HIST1H2BN	6p22.1	-1.01035	8.54e-16	2.53e-14	2
HIVEP3	1p34.2	-0.442883	4.48e-05	0.000144844	2
HNRNPR	1p36.12	-0.131083	0.012359	0.0231478	2
HSD17B11	4q22.1	-0.44261	0.00194723	0.00445649	2
IKBIP	12q23.1	0.549479	1.49e-11	1.74e-10	2
IL1RL2	2q12.1	1.10627	2.01e-05	7e-05	2
ITGB6	2q24.2	1.65268	4.74e-10	4.05e-09	2
KDM1A	1p36.12	-0.278527	2.99e-07	1.46e-06	2
KIAA0907		-0.326077	0.00106918	0.00258771	2
KIF11	10q23.33	-0.621033	6.41e-06	2.44e-05	2
KIFC2	8q24.3	-0.385045	0.0204917	0.0364112	2
KLHDC7A	1p36.13	0.995476	0.0021251	0.0048252	2
LOXL1	15q24.1	0.624687	2.01e-07	1.02e-06	2
LRIG1	3p14.1	-1.28351	2.3e-31	1.46e-28	2
LRRFIP1	2q37.3	-0.190355	0.00511217	0.0105519	2
LTBP2	14q24.3	0.482201	0.00203045	0.00462969	2
LTF	3p21.31	1.38848	0.00920569	0.0178196	2
MANEAL	1p34.3	-0.903696	8.88e-13	1.35e-11	2
MAP4	3p21.31	0.31203	3.64e-06	1.46e-05	2
MAPKBP1	15q15.1	0.395922	3.02e-08	1.8e-07	2
MBOAT7	19q13.42	0.164927	0.0140191	0.0259642	2
MECOM	3q26.2	1.46953	1.18e-18	6.41e-17	2
MEIS2	15q14	1.18177	2.64e-10	2.39e-09	2
MGAT5	2q21.2-q21.3	-0.315633	0.000177893	0.000507885	2
MIEF1	22q13.1	-0.184048	0.000170343	0.00048865	2
MMP2	16q12.2	0.714576	1.72e-05	6.07e-05	2
MTUS2	13q12.3	-0.985821	3.35e-05	0.000111515	2
MUC3A	7q22.1	-0.957022	0.00351897	0.00758718	2
MUC4	3q29	1.36293	0.000242004	0.000671532	2
NAA25	12q24.13	-0.264872	2.5e-05	8.56e-05	2
NCAPD3	11q25	-1.07273	6.67e-05	0.000206789	2
NCDN	1p34.3	-0.456733	1.51e-09	1.16e-08	2
NCKAP1	2q32.1	0.317757	1.26e-05	4.54e-05	2
NF2	22q12.2	-0.194035	0.0037272	0.00798011	2
NFATC4	14q12	0.956588	5.89e-12	7.54e-11	2
NFE2L3	7p15.2	-1.04226	2.25e-12	3.14e-11	2
NLRP8	19q13.43	-2.20506	1.1e-13	2.03e-12	2
PARP6	15q23	0.657046	4.05e-05	0.000132325	2
PCDH17	13q21.1	-0.5296	0.021087	0.0373036	2
PCDHB10	5q31.3	-0.816138	0.000208345	0.000586345	2
PCDHB13	5q31.3	-0.378062	0.0139212	0.0257959	2
PCDHGA12	5q31.3	0.481727	0.0220924	0.0389252	2
PCDHGA4	5q31	-0.557305	0.00850745	0.0166111	2
PGR	11q22.1	1.15236	3.6e-08	2.12e-07	2
PHTF2	7q11.23-q21.11	0.521245	3.81e-10	3.34e-09	2
PIK3R3	1p34.1	-0.251408	0.00815513	0.015996	2
PLCE1	10q23.33	0.643839	5.28e-10	4.47e-09	2
PLCH1	3q25.31	0.948065	2.65e-05	8.99e-05	2
PLEKHH2	2p21	0.990305	1.89e-08	1.17e-07	2
POM121	7q11.23	-0.416152	2.28e-06	9.49e-06	2
PRDM10	11q24.3	-0.285602	3.48e-05	0.0001154	2
PRKCSH	19p13.2	-0.371437	2.42e-08	1.47e-07	2
PROCA1	17q11.2	0.357914	0.00452955	0.0094971	2
PROS1	3q11.1	-0.473795	0.00171687	0.00397369	2
PRUNE2	9q21.2	0.429795	0.0121903	0.0228597	2
PTPDC1	9q22.32	-0.266434	4.75e-05	0.000152314	2
PTPRO	12p12.3	0.439787	0.0136783	0.0254019	2
QARS	3p21.31	-0.370579	3.16e-08	1.87e-07	2
RALGAPA1	14q13.2	-0.339813	4.2e-06	1.66e-05	2
RAPGEFL1	17q21.1	1.22272	3.3e-17	1.33e-15	2
RC3H2	9q33.2	-0.143858	0.0250816	0.0435548	2
REL	2p16.1	0.314737	0.0229639	0.0402375	2
RPE65	1p31.3	1.95212	5.49e-07	2.56e-06	2
RPGRIP1	14q11.2	-0.747315	1.08e-08	7e-08	2
SEC31B	10q24.31	-0.557439	0.00133568	0.00316864	2
SELENBP1	1q21.3	0.429167	0.000232026	0.000647175	2
SFRP2	4q31.3	0.540053	0.0121574	0.0228073	2
SHCBP1	16q11.2	-0.846843	1.06e-06	4.66e-06	2
SLC12A4	16q22.1	0.667804	2.84e-09	2.07e-08	2
SLC25A12	2q31.1	0.660414	1.01e-22	1.33e-20	2
SLC35F1	6q22.2-q22.31	0.565961	0.0199809	0.0356336	2
SLC5A3	21q22.11	0.380429	2.02e-05	7.01e-05	2
SLC6A11	3p25.3	-1.97112	1.06e-13	1.97e-12	2
SLIT2	4p15.31	0.489837	0.00114386	0.00275039	2
SMG7	1q25.3	-0.193377	1.41e-05	5.05e-05	2
SPRED3	19q13	-0.564912	1.25e-06	5.44e-06	2
SRCAP	16p11.2	-0.168499	0.00255015	0.00567769	2
ST5	11p15	1.10744	1.74e-18	9.04e-17	2
ST8SIA4	5q21.1	0.442868	0.00358439	0.00771288	2
ST8SIA5	18q21.1	-0.453317	0.0120328	0.0226059	2
STK26	Xq26.2	1.01038	4.1e-15	1.04e-13	2
SULF1	8q13.2-q13.3	0.450196	0.0143711	0.0265334	2
TAGLN2	1q23.2	0.766437	6.42e-11	6.65e-10	2
TATDN2	3p25.3	-0.159398	0.00586336	0.0119223	2
TCTN2	12q24.31	-0.294597	0.000677454	0.00171273	2
TEKT2	1p34.3	0.698276	0.00347306	0.00749697	2
TEP1	14q11.2	-0.315788	2.64e-06	1.08e-05	2
TGM1	14q12	1.53737	4.41e-14	8.9e-13	2
TMEM102	17p13.1	0.338103	0.00251973	0.00561811	2
TMEM177	2q14.2	-0.196624	0.0063635	0.0128216	2
TMEM201	1p36.22	-0.246317	3.49e-05	0.000115671	2
TMEM92	17q21.33	1.00931	0.000282807	0.000772083	2
TNN	1q25.1	-1.64381	1.25e-08	7.99e-08	2
TPCN1	12q24.13	0.399202	2.22e-07	1.12e-06	2
TRPC6	11q22.1	1.39383	1.01e-13	1.89e-12	2
TTC6	14q21.1	-1.66058	5.63e-23	7.57e-21	2
TUBG1	17q21.31	-0.169226	0.0224238	0.0394521	2
UBE2O	17q25.1	-0.347726	1.31e-12	1.93e-11	2
UIMC1	5q35.2	0.174295	3.66e-05	0.000120623	2
UNC5B	10q22.1	1.54496	3.41e-20	2.53e-18	2
UNK	17q25.3	0.0987532	0.0285727	0.0487897	2
URI1	19q12	-0.17457	0.00417208	0.00882597	2
USP22	17p11.2	-0.341943	2.24e-06	9.32e-06	2
VAV2	9q34.2	-0.674267	2.22e-19	1.37e-17	2
VEZF1	17q22	0.324414	1.76e-07	9.06e-07	2
ZBTB7B	1q21.3	-0.51134	1.66e-09	1.27e-08	2
ZCCHC6	9q21.33	-0.881432	1.51e-14	3.39e-13	2
ZDHHC17	12q21.2	0.137287	0.0273041	0.0468797	2
ZFP69B	1p34.2	-0.983541	1.89e-17	8.04e-16	2
ZHX1	8q24.13	0.215497	0.00362715	0.00779427	2
ZNF514	2q11.1	-0.217506	0.0050966	0.0105245	2
ZNF592	15q25.2	-0.11479	0.0185549	0.0333752	2
2019-09-08		0.230035	0.000251916	0.000696312	1
AAAS	12q13.13	-0.281922	7.39e-09	4.96e-08	1
ABCA1	9q31.1	-0.358289	0.00559045	0.0114353	1
ABCB6	2q35	-0.232085	0.0038912	0.00829079	1
ABHD10	3q13.2	-0.22879	0.00309687	0.00675935	1
ABI3BP	3q12.2	0.589415	0.00149472	0.00351067	1
ACAA2	18q21.1	0.939975	1.52e-12	2.21e-11	1
ACE2	Xp22.2	1.59385	1.53e-15	4.25e-14	1
ACKR3	2q37.3	1.07992	1.19e-10	1.16e-09	1
ACO1	9p21.1	0.313853	2.85e-05	9.61e-05	1
ACOT11	1p32.3	1.22177	2.17e-12	3.04e-11	1
ACOX1	17q25.1	-0.181313	0.00219443	0.00496488	1
ACRV1	11q24.2	-0.867885	0.000371754	0.000992997	1
ACSM1	16p12.3	-2.63472	7.45e-14	1.44e-12	1
ACSM5	16p12.3	0.864693	2.01e-07	1.02e-06	1
ACTB	7p22.1	0.605871	3.04e-14	6.41e-13	1
ACTC1	15q14	2.67687	2.77e-12	3.78e-11	1
ACVRL1	12q13.13	0.894024	8.18e-12	1.02e-10	1
ACY1	3p21.2	-0.714392	8.61e-12	1.06e-10	1
ADAMDEC1	8p21.2	-0.859756	0.001622	0.00378165	1
ADAMTS12	5p13.3-p13.2	0.407981	0.0163925	0.0298558	1
ADAMTSL3	15q25.2	0.849913	2.03e-05	7.05e-05	1
ADARB1	21q22.3	-0.195472	0.00766905	0.0151458	1
ADCY9	16p13.3	0.73134	1.78e-11	2.04e-10	1
ADPGK	15q24.1	-0.730097	3.75e-13	6.22e-12	1
AES	19p13.3	0.292684	1.54e-05	5.47e-05	1
AFF1	4q21.3-q22.1	-0.208849	0.0136221	0.0253103	1
AFF2	Xq28	1.31648	4.01e-09	2.84e-08	1
AGA	4q34.3	-0.301484	0.000337369	0.000909323	1
AGAP2	12q14.1	-0.382073	0.00222215	0.00502081	1
AGFG2	7q22.1	-0.252877	0.00991271	0.0190386	1
AGK	7q34	-0.255582	1.17e-05	4.26e-05	1
AGPAT3	21q22.3	-0.440557	1.39e-12	2.03e-11	1
AGPAT5	8p23.1	-0.285591	0.00151993	0.00356488	1
AGRN	1p36.33	-0.294055	0.00322642	0.00701308	1
AGTPBP1	9q21.33	-0.30007	0.000564899	0.0014535	1
AHCY	20q11.22	-0.341124	7.39e-06	2.78e-05	1
AIFM3	22q11.21	0.991039	7.24e-10	5.95e-09	1
AIMP2	7p22.1	-0.373358	1.56e-06	6.65e-06	1
AK7	14q32.2	0.352494	0.0086842	0.016915	1
AKAP1	17q22	-0.230048	0.000634454	0.00161287	1
AKAP11	13q14.11	0.374764	4.53e-05	0.000146157	1
AKR1C1	10p15.1	0.918726	1.56e-05	5.52e-05	1
AKR7L	1p36.13	-0.583144	0.000522454	0.00135298	1
AKT2	19q13.2	-0.121779	0.00308556	0.00673785	1
ALDH18A1	10q24.1	-0.390196	3.13e-08	1.86e-07	1
ALG10B	12q12	-0.230808	0.00201363	0.00459531	1
ALG12	22q13.33	-0.186252	0.00718698	0.0142856	1
AMDHD2	16p13.3	-0.483865	9.39e-09	6.17e-08	1
ANAPC4	4p15.2	0.36149	5.48e-08	3.1e-07	1
ANGPTL1	1q25.2	1.32597	4.79e-08	2.75e-07	1
ANGPTL2	9q33.3	0.782224	1.63e-06	6.93e-06	1
ANKRD17	4q13.3	-0.208088	0.0139157	0.0257882	1
ANKRD27	19q13.11	0.163196	0.00109938	0.00265418	1
ANKRD35	1q21.1	1.15224	8.71e-10	7.01e-09	1
ANKS1A	6p21.31	0.286619	2.03e-06	8.5e-06	1
ANO5	11p14.3	1.37258	2.75e-09	2.01e-08	1
ANO7	2q37.3	-1.65487	3.63e-10	3.18e-09	1
ANO8	19p13.11	-0.418332	6.76e-07	3.09e-06	1
AP1G2	14q11.2	-0.51561	2.39e-08	1.45e-07	1
AP3D1	19p13.3	-0.267226	3.39e-07	1.65e-06	1
APOBEC3F	22q13.1	0.984637	2.62e-08	1.58e-07	1
APPL2	12q23.3	-0.331946	1.18e-05	4.29e-05	1
ARAP1	11q13.4	0.199789	0.00167625	0.00388895	1
ARHGEF9	Xq11.1	0.475439	5.6e-11	5.85e-10	1
ARL4C	2q37.1	0.799864	4.81e-09	3.35e-08	1
ARL6	3q11.2	0.226206	0.00117511	0.00282003	1
ARNTL2	12p11.23	0.463079	0.00615163	0.0124465	1
ARRDC1	9q34.3	-0.213679	0.0117649	0.0221522	1
ARSD	Xp22.33	-0.439964	5.78e-07	2.68e-06	1
ASB2	14q32.12	1.35271	2.22e-10	2.05e-09	1
ASB6	9q34.11	0.119809	0.00611128	0.0123761	1
ASTN2	9q33.1	-0.764001	5.25e-07	2.46e-06	1
ATAD2B	2p24.1-p23.3	-0.2469	0.000970186	0.00236829	1
ATE1	10q26.13	0.152997	0.0174168	0.0315374	1
ATF6B	6p21.3	-0.119116	0.0144473	0.0266502	1
ATF7IP2	16p13.2-p13.13	0.774493	0.000577186	0.00148119	1
ATG4D	19p13.2	-0.169423	0.00823348	0.0161377	1
ATL3	11q13.1	0.164317	0.0180768	0.0326071	1
ATOH1	4q22.2	-2.45382	2.01e-06	8.45e-06	1
ATP1A2	1q23.2	1.40619	4.58e-08	2.64e-07	1
ATP2C2	16q24.1	-0.664122	8.86e-05	0.000268196	1
ATP6AP2	Xp11.4	0.253595	4.38e-06	1.73e-05	1
ATP6V0B	1p34.1	-0.304461	0.000828191	0.00205051	1
ATP6V0D2	8q21.3	1.6136	2.47e-08	1.5e-07	1
ATP6V1C2	2p25.1	0.660906	0.000258253	0.000712333	1
ATXN2L	16p11.2	-0.315675	7.08e-07	3.23e-06	1
AURKB	17p13.1	-0.913351	3.57e-07	1.72e-06	1
AZGP1P1	7q22.1	-1.2402	3.31e-06	1.34e-05	1
B3GALT2	1q31.2	1.25028	9.52e-08	5.16e-07	1
B3GAT3	11q12.3	-0.418498	4.49e-06	1.77e-05	1
B3GNT2	2p15	0.314146	0.00164758	0.00383159	1
B3GNT8	19q13.2	1.74449	8.3e-20	5.52e-18	1
B4GALT4	3q13.32	0.132218	0.0265359	0.0457654	1
BAG1	9p13.3	0.210061	0.00366084	0.00785577	1
BBOX1	11p14.2	1.10317	6.83e-05	0.000211571	1
BBS10	12q21.2	0.225692	0.00424186	0.00896022	1
BBX	3q13.12	0.65495	5.45e-13	8.72e-12	1
BCAM	19q13.32	-1.08709	2.66e-16	8.86e-15	1
BCAS1	20q13.2	-0.930989	4.88e-05	0.000155909	1
BCAT2	19q13.33	-0.57883	5.58e-08	3.15e-07	1
BCKDK	16p11.2	-0.160562	0.0114822	0.0216886	1
BEND7	10p13	0.535661	9.93e-05	0.000297854	1
BMS1	10q11.21	-0.16955	0.000774935	0.00193372	1
BRAT1	7p22.3	-0.329971	3.5e-05	0.000116009	1
BRCC3	Xq28	-0.261682	2.27e-05	7.83e-05	1
BRINP1	9q33.1	0.818383	0.00216015	0.00489509	1
BRPF3	6p21.31	-0.189673	0.0178135	0.0321818	1
BTD	3p25.1	-0.307742	0.000437633	0.00115079	1
BTG1	12q21.33	0.308534	3.44e-05	0.000114139	1
BTN2A1	6p22.2	0.506912	2.9e-15	7.61e-14	1
BTN3A2	6p22.2	0.37211	0.011124	0.0211159	1
C11orf24	11q13.2	-0.178859	0.00495447	0.0102747	1
C11orf80	11q13.2	-0.478537	7.95e-08	4.37e-07	1
C15orf59	15q24.1	1.62685	1.05e-19	6.92e-18	1
C16orf70	16q22.1	-0.778634	4.33e-16	1.37e-14	1
C17orf67	17q22	0.434564	5.7e-06	2.2e-05	1
C18orf25	18q21.1	0.163538	0.00585214	0.0119032	1
C20orf194	20p13	0.882659	8.16e-15	1.92e-13	1
C4orf19	4p14	1.51383	2.33e-07	1.17e-06	1
C6orf120	6q27	-0.248534	0.000570706	0.00146701	1
C8orf34	8q13.2	-0.419861	0.0233227	0.0407849	1
C9orf43	9q32	-0.624248	2.32e-09	1.73e-08	1
CA11	19q13.33	1.08864	8.56e-13	1.31e-11	1
CA3	8q21.2	2.07029	1.35e-06	5.81e-06	1
CA4	17q23.1	1.20356	2.07e-06	8.65e-06	1
CADM1	11q23.3	-0.575309	3.46e-05	0.000114906	1
CALD1	7q33	1.00761	2.98e-13	5.05e-12	1
CAND2	3p25.2	1.00973	1.72e-10	1.62e-09	1
CANT1	17q25.3	-0.816691	3.85e-18	1.83e-16	1
CAP1	1p34.2	0.251515	1.08e-08	7e-08	1
CAPN6	Xq23	1.56031	1.16e-06	5.06e-06	1
CARD6	5p13.1	0.900968	5.02e-10	4.28e-09	1
CARF	2q33.2	0.351701	7.17e-07	3.26e-06	1
CASKIN2	17q25.1	0.212533	0.000710205	0.00178817	1
CATSPERB	14q32.12	-0.770381	1.48e-09	1.15e-08	1
CAV2	7q31.2	1.37106	9.03e-19	4.98e-17	1
CCDC121	2p23.3	0.164091	0.0274953	0.0471552	1
CCDC151	19p13.2	0.993618	3.59e-09	2.57e-08	1
CCDC158	4q21.1	0.99397	2.8e-10	2.52e-09	1
CCDC174	3p25.1	0.153741	4.3e-05	0.000139284	1
CCDC74A	2q21.1	0.697775	4.61e-05	0.000148551	1
CCDC88A	2p16.1	0.736655	1.08e-08	6.98e-08	1
CCL28	5p12	0.627549	0.000194435	0.000550224	1
CCNB1	5q13.2	-0.571567	2.23e-06	9.28e-06	1
CCNH	5q14.3	-0.24502	0.00786611	0.0154935	1
CCNL1	3q25.31	-0.26338	0.0113418	0.0214652	1
CD109	6q13	0.444175	0.00155479	0.00363646	1
CD163L1	12p13.31	-0.823161	0.00110454	0.00266455	1
CD244	1q23.3	0.760749	2.37e-05	8.12e-05	1
CD248	11q13.2	0.878352	2.72e-08	1.64e-07	1
CD3EAP	19q13.32	-0.641203	2.72e-16	9.03e-15	1
CD74	5q33.1	0.376158	0.00938135	0.0181215	1
CDH1	16q22.1	-0.402533	0.000567247	0.00145873	1
CDH17	8q22.1	1.30902	3.77e-07	1.82e-06	1
CDPF1	22q13.31	0.162138	0.0185291	0.0333419	1
CELF1	11p11.2	-0.21203	7.97e-06	2.99e-05	1
CENPB	20p13	0.285272	2.62e-05	8.92e-05	1
CENPF	1q41	-1.22516	1.18e-10	1.15e-09	1
CEP112	17q24.1	0.597	3.05e-11	3.36e-10	1
CEP120	5q23.2	0.471816	3.9e-12	5.16e-11	1
CEP152	15q21.1	0.288304	0.00444308	0.00933748	1
CEP57L1	6q21	0.156261	0.0191854	0.0343918	1
CEP72	5p15.33	-0.259404	0.000783266	0.00195239	1
CFL2	14q13.1	1.17538	4.05e-19	2.37e-17	1
CHCHD1	10q22.2	-0.250131	0.00461549	0.00965209	1
CHD8	14q11.2	-0.143046	0.0107329	0.0204388	1
CHN1	2q31.1	0.860731	5.35e-10	4.53e-09	1
CHPF	2q35	-0.328305	0.00282226	0.00621665	1
CHRM1	11q12.3	-0.867985	7.8e-05	0.000238699	1
CHRNA2	8p21.2	-1.77957	2.61e-10	2.37e-09	1
CHRNA3	15q25.1	-0.608282	0.005034	0.0104162	1
CHST8	19q13.11	-0.798343	0.000226146	0.000632288	1
CIAPIN1	16q21	-0.189434	0.00450958	0.00946498	1
CKMT1B	15q15.3	-0.536374	0.0123813	0.0231849	1
CLCA4	1p22.3	2.19025	9.36e-07	4.17e-06	1
CLCN4	Xp22.2	0.380149	0.0226903	0.0398377	1
CLIC1	6p21.33	-0.167543	0.0138389	0.0256693	1
CLIP3	19q13.12	1.24732	2.33e-13	4.02e-12	1
CLPTM1	19q13.32	-0.205331	0.00110075	0.00265679	1
CLSTN2	3q23	0.958508	0.00381916	0.00815615	1
CLUH	17p13.3	-0.211956	0.0056681	0.0115646	1
CLVS2	6q22.31	1.48482	3.43e-07	1.66e-06	1
CNOT10	3p22.3	-0.218536	1.23e-07	6.54e-07	1
CNOT3	19q13.42	-0.181276	4.74e-05	0.00015225	1
CNR1	6q15	1.2532	2.35e-09	1.74e-08	1
CNTNAP2	7q35-q36.1	-1.58453	2.02e-10	1.88e-09	1
COASY	17q21.2	-0.147798	0.0282547	0.0483182	1
COG3	13q14.13	-0.317508	0.000238321	0.00066241	1
COG5	7q22.3	-0.312074	0.000595615	0.00152381	1
COL23A1	5q35.3	1.16299	7.68e-09	5.14e-08	1
COL8A2	1p34.3	0.876106	2.57e-07	1.27e-06	1
COL9A2	1p34.2	-1.31606	8.51e-06	3.17e-05	1
COLEC12	18p11.32	-1.50867	7.54e-20	5.07e-18	1
COPG1	3q21.3	-0.493134	1.25e-10	1.22e-09	1
CORO2B	15q23	0.982698	7.57e-10	6.19e-09	1
CPEB3	10q23.32	-0.29961	0.014866	0.027324	1
CPNE5	6p21.2	0.950109	6.53e-08	3.65e-07	1
CPNE6	14q11.2	2.19701	9.67e-09	6.34e-08	1
CPSF7	11q12.2	-0.127488	0.00462628	0.00967246	1
CPT1B	22q13.33	-0.891586	2.05e-07	1.04e-06	1
CRAT	9q34.11	-0.623058	8.55e-07	3.84e-06	1
CREB5	7p15.1-p14.3	0.534048	0.000561592	0.0014458	1
CRTAC1	10q24.2	2.51145	3.5e-24	5.82e-22	1
CSF1	1p13.3	0.499458	4.04e-05	0.000132037	1
CSRNP1	3p22.2	0.440561	0.00429824	0.00906269	1
CTDSP2	12q14.1	0.144059	0.024803	0.043132	1
CTDSPL2	15q15.3-q21.1	0.143986	0.0153401	0.0281226	1
CTIF	18q21.1	0.404634	9.57e-07	4.25e-06	1
CTPS2	Xp22.2	-0.191569	0.000339728	0.000914344	1
CUL7	6p21.1	-0.370531	7.28e-08	4.02e-07	1
CXorf38	Xp11.4	0.340534	1.48e-11	1.74e-10	1
CXXC5	5q31.2	-0.202057	0.00529391	0.0108892	1
CYB561D2	3p21.31	-0.399873	2.12e-05	7.35e-05	1
CYGB	17q25.1	0.367378	0.00871111	0.016962	1
CYP2D7	22q13.2	-0.477597	0.0190663	0.0342051	1
CYP2J2	1p32.1	-1.18537	1.33e-07	7e-07	1
CYP2S1	19q13.2	0.897585	1.26e-07	6.67e-07	1
CYP39A1	6p12.3	-0.665743	2.98e-06	1.22e-05	1
CYP4F22	19p13.12	2.70807	2.63e-18	1.31e-16	1
DAAM1	14q23.1	-0.155155	0.0142332	0.0263132	1
DAPK3	19p13.3	0.214383	0.0140465	0.0260124	1
DAZAP2	12q13.13	0.180853	7.62e-05	0.000233674	1
DCAF16	4p15.31	-0.221	3.65e-05	0.000120355	1
DCLRE1A	10q25.3	-0.319892	0.000320474	0.000867847	1
DDHD2	8p11.23	0.381497	1.39e-05	4.98e-05	1
DDX19B	16q22.1	0.3077	1.01e-06	4.49e-06	1
DDX31	9q34.13	-0.262308	2.07e-05	7.17e-05	1
DDX5	17q23.3	-0.160295	0.0163368	0.029769	1
DDX60L	4q32.3	-0.302636	0.00692636	0.0138227	1
DENND1A	9q33.3	-0.369235	8.41e-10	6.8e-09	1
DENND2A	7q34	0.612716	6.25e-05	0.000195125	1
DFNA5		0.850769	9.79e-12	1.19e-10	1
DHX33	17p13.2	-0.230888	8.09e-05	0.000246977	1
DHX34	19q13.32	-0.157123	0.0239417	0.041788	1
DIAPH3	13q21.2	-1.16054	2.6e-10	2.36e-09	1
DICER1	14q32.13	-0.245653	0.00356829	0.00768633	1
DIRAS3	1p31.3	0.80929	1.42e-06	6.11e-06	1
DKC1	Xq28	-0.474173	2.12e-16	7.16e-15	1
DNAAF3	19q13.42	-1.19003	3.09e-08	1.84e-07	1
DNAJC16	1p36.21	-0.304109	1.34e-07	7.04e-07	1
DNAJC18	5q31.2	0.677621	6.67e-16	2.02e-14	1
DNAJC8	1p35.3	0.21399	1.83e-07	9.38e-07	1
DNASE1L3	3p14.3	1.02576	3.91e-07	1.88e-06	1
DNASE2	19p13.13	0.383534	5.9e-05	0.000185188	1
DNMBP	10q24.2	-0.25701	0.00321621	0.00699331	1
DNPEP	2q35	-0.181428	0.000458121	0.00120021	1
DPAGT1	11q23.3	-0.394327	2.26e-09	1.68e-08	1
DPY19L1	7p14.2	0.401376	0.000146119	0.00042431	1
DPYSL2	8p21.2	0.668745	2.09e-07	1.06e-06	1
DPYSL4	10q26.3	-0.841896	0.000905737	0.00222427	1
DSE	6q22.1	0.744734	2.24e-11	2.52e-10	1
DSN1	20q11.23	0.275576	9.94e-06	3.66e-05	1
DTX3L	3q21.1	-0.620809	8.36e-13	1.29e-11	1
DUSP16	12p13.2	-0.349244	0.00015058	0.000436166	1
DYNC1I1	7q21.3	0.958563	4.93e-09	3.43e-08	1
E2F3	6p22.3	-0.523479	6.2e-08	3.48e-07	1
EBAG9	8q23.2	0.207044	0.00125532	0.00299687	1
EBNA1BP2	1p34.2	-0.205349	0.000714326	0.00179781	1
EDC3	15q24.1	-0.306286	3.71e-09	2.65e-08	1
EFCAB13	17q21.32	-0.316486	0.00454878	0.00953206	1
EFHD1	2q37.1	1.07017	9.35e-11	9.35e-10	1
EFS	14q11.2	1.32525	7.48e-11	7.63e-10	1
EHD1	11q13.1	0.277235	4.58e-05	0.000147725	1
EIF3A	10q26.11	-0.245148	0.0013683	0.00323852	1
EIF3C	16p11.2	-0.40053	2.14e-05	7.42e-05	1
EIF3I	1p35.2	-0.371025	2.15e-07	1.08e-06	1
ELAVL2	9p21.3	-2.09064	1.4e-11	1.66e-10	1
EMB	5q11.1	-0.971235	1.12e-17	4.98e-16	1
EME2	16p13.3	-0.723356	3.84e-06	1.53e-05	1
EMILIN3	20q12	0.943755	1.74e-07	8.92e-07	1
EN2	7q36.3	-2.1957	5.61e-08	3.17e-07	1
ENTPD3	3p22.1	1.26842	2.63e-14	5.6e-13	1
ENTPD6	20p11.21	-0.801886	2.03e-21	2.03e-19	1
ENTPD7	10q24.2	-0.452098	1.59e-05	5.63e-05	1
EPB41	1p35.3	-0.614267	5.41e-11	5.65e-10	1
EPC2	2q23.1	0.185123	0.00706101	0.014064	1
EPHA4	2q36.1	0.33509	0.0229324	0.0401938	1
EPHA8	1p36.12	-2.84722	1.63e-18	8.57e-17	1
EPHX3	19p13.12	1.30039	1.95e-08	1.21e-07	1
EPS8L1	19q13.42	-0.532158	5.04e-05	0.000160862	1
ERC1	12p13.33	0.4057	6.86e-07	3.13e-06	1
ERCC3	2q14.3	-0.134719	0.00487934	0.0101383	1
ERCC6L	Xq13.1	-0.764502	1.04e-07	5.59e-07	1
ERI2	16p12.3	-0.190127	0.00426702	0.00900511	1
ERN2	16p12.2	2.02549	2.07e-06	8.65e-06	1
ETF1	5q31.2	0.143726	0.00363849	0.0078156	1
EXOSC4	8q24.3	-0.321927	0.00379877	0.00811544	1
EXT2	11p11.2	-0.13857	0.00914114	0.0177039	1
EXTL1	1p36.11	0.630151	0.00161073	0.00375681	1
EXTL3	8p21.1	0.291387	0.000202087	0.000570127	1
EYA2	20q13.12	0.28513	0.00839825	0.0164239	1
F2R	5q13.3	-0.540314	0.000796502	0.0019819	1
FAAH	1p33	-0.833708	7.23e-11	7.39e-10	1
FABP3	1p35.2	1.04171	7.81e-08	4.3e-07	1
FAM107B	10p13	0.399322	0.00100074	0.00243359	1
FAM111A	11q12.1	-0.923075	1.1e-17	4.89e-16	1
FAM111B	11q12.1	-1.27267	5.36e-10	4.53e-09	1
FAM120C	Xp11.22	0.24193	0.00033045	0.000892107	1
FAM13B	5q31.2	0.587723	4.16e-14	8.45e-13	1
FAM169A	5q13.3	0.654807	0.000143981	0.000418696	1
FAM184A	6q22.31	0.526864	0.000103433	0.000309274	1
FAM192A	16q13	0.116582	0.0215539	0.0380529	1
FAM212A	3p21.31	1.65916	3.64e-18	1.75e-16	1
FAM50B	6p25.2	0.30834	0.00832519	0.0163013	1
FAM60A		0.229912	0.00775752	0.0153041	1
FAM69B	9q34.3	-0.542174	7.16e-07	3.26e-06	1
FAM83H	8q24.3	-0.727791	4.94e-13	7.98e-12	1
FAM8A1	6p22.3	0.195335	0.00110868	0.00267349	1
FANCI	15q26.1	-0.224685	0.0125732	0.0235131	1
FAXC	6q16.2	0.187108	0.0200511	0.0357421	1
FBXL17	5q21.3	0.192612	0.0116334	0.0219337	1
FBXL2	3p22.3	1.03954	1.9e-10	1.77e-09	1
FBXL20	17q12	-0.137182	0.00991295	0.0190386	1
FBXL5	4p15.32	0.250781	6e-05	0.00018797	1
FBXO42	1p36.13	-0.126395	0.00474079	0.0098816	1
FBXW8	12q24.22	-0.212127	0.00493245	0.0102371	1
FCRL6	1q23.2	0.462699	0.0186077	0.033454	1
FCRLB	1q23.3	1.22031	1e-13	1.87e-12	1
FEM1B	15q23	0.494801	9.92e-19	5.44e-17	1
FGD2	6p21.2	0.438258	0.006501	0.0130687	1
FGD4	12p11.21	0.316243	0.0056739	0.0115739	1
FGD5	3p25.1	0.513549	0.000169739	0.000487068	1
FGF10	5p12	1.34425	3.9e-07	1.87e-06	1
FGFRL1	4p16.3	-1.30815	2.55e-18	1.28e-16	1
FGGY	1p32.1	0.201819	0.0148149	0.0272383	1
FKBP14	7p14.3	0.46625	1.35e-12	1.99e-11	1
FKBP7	2q31.2	0.480337	2.86e-09	2.08e-08	1
FMN1	15q13.3	-0.557656	0.0017475	0.00403749	1
FMOD	1q32.1	-1.30314	5.81e-09	3.98e-08	1
FNDC3A	13q14.2	0.246024	0.00896529	0.0174036	1
FNIP2	4q32.1	-0.849687	4.91e-09	3.41e-08	1
FOCAD	9p21.3	-0.332259	1.2e-05	4.36e-05	1
FOLH1	11p11.12	-2.51889	2.66e-20	2.03e-18	1
FOLR1	11q13.4	2.39795	3.68e-14	7.57e-13	1
FOXA2	20p11.21	1.30368	0.000142892	0.000415727	1
FOXC2	16q24.1	0.436117	0.0262932	0.0453936	1
FOXJ2	12p13.31	0.347381	4.79e-09	3.34e-08	1
FOXJ3	1p34.2	-0.186132	0.000178254	0.000508652	1
FRMD3	9q21.32	1.06484	1.2e-12	1.78e-11	1
FRRS1L	9q31.3	1.07493	3.87e-06	1.54e-05	1
FST	5q11.2	0.891343	2.19e-05	7.54e-05	1
FUCA2	6q24.2	-0.403491	2.14e-07	1.08e-06	1
FXYD3	19q13.12	-0.52238	0.00212662	0.00482807	1
FYCO1	3p21.31	0.32265	0.000232627	0.000648604	1
G0S2	1q32.2	1.66354	5.7e-21	5.12e-19	1
G3BP1	5q33.1	-0.25674	4.76e-06	1.86e-05	1
GAA	17q25.3	-0.576638	7.55e-10	6.17e-09	1
GABRD	1p36.33	-0.803492	0.000435987	0.00114685	1
GALNT13	2q23.3-q24.1	0.955826	0.00224987	0.00507474	1
GALNTL6	4q34.1	-1.09491	3.26e-05	0.000109001	1
GANC	15q15.1	0.158018	0.00621895	0.0125606	1
GATAD2A	19p13.11	-0.195024	0.00039672	0.00105342	1
GBP1	1p22.2	0.836403	2.54e-06	1.05e-05	1
GCG	2q24.2	-1.31537	0.00165936	0.00385657	1
GCSAML	1q44	-0.950965	0.00408519	0.00866703	1
GDF10	10q11.22	1.63317	2.82e-08	1.69e-07	1
GEMIN4	17p13.3	-0.491465	1.53e-08	9.63e-08	1
GFM2	5q13.3	-0.224708	0.00239573	0.00536694	1
GFPT1	2p13.3	-0.496578	6.54e-08	3.65e-07	1
GGA2	16p12.2	0.395069	1.43e-13	2.55e-12	1
GHITM	10q23.1	0.232944	5.68e-05	0.000179261	1
GIMAP1	7q36.1	0.370446	0.00492335	0.0102205	1
GINM1	6q25.1	0.269676	3.8e-07	1.83e-06	1
GINS3	16q21	0.521015	8.1e-10	6.56e-09	1
GIT2	12q24.11	0.25874	0.00125932	0.00300527	1
GJC1	17q21.31	1.01323	5.71e-10	4.81e-09	1
GK5	3q23	-0.52423	3.44e-09	2.47e-08	1
GKAP1	9q21.32	0.159863	0.0163106	0.0297361	1
GLB1L3	11q25	-0.801696	0.0121597	0.0228093	1
GLMN	1p22.1	-0.218949	0.00125355	0.00299345	1
GMEB2	20q13.33	-0.301687	1.03e-08	6.72e-08	1
GNB3	12p13.31	0.840829	2.76e-06	1.13e-05	1
GNPTAB	12q23.2	0.52692	0.000225996	0.000631966	1
GOLGA3	12q24.33	-0.311393	1.22e-08	7.85e-08	1
GPATCH8	17q21.31	0.159996	0.0266861	0.0459857	1
GPER1	7p22.3	0.818452	9.81e-06	3.61e-05	1
GPHN	14q23.3	-0.162183	0.00496208	0.0102882	1
GPR160	3q26.2	-1.23629	2.74e-22	3.32e-20	1
GPRASP2	Xq22.1	0.217667	0.00316025	0.00688789	1
GREB1	2p25.1	-1.02892	8.98e-07	4.02e-06	1
GRIA2	4q32.1	1.0992	6.41e-05	0.000199688	1
GRIA3	Xq25	0.863071	0.00156306	0.00365441	1
GRIK5	19q13.2	0.851549	6.74e-09	4.56e-08	1
GRIP1	12q14.3	0.579278	4.78e-07	2.25e-06	1
GRIPAP1	Xp11.23	-0.204931	4.62e-06	1.81e-05	1
GTF3C2	2p23.3	-0.154425	0.000288143	0.000785257	1
GTF3C6	6q21	-0.646406	3.85e-08	2.25e-07	1
GTPBP4	10p15.3	-0.287352	2.27e-08	1.39e-07	1
GUCY1A3		-1.27731	9.27e-17	3.38e-15	1
GUF1	4p12	-0.399658	1.12e-10	1.1e-09	1
H2AFY	5q31.1	-0.229969	4.02e-05	0.000131293	1
HAPLN2	1q23.1	1.26811	2.78e-09	2.03e-08	1
HAX1	1q21.3	0.204643	0.000177162	0.000506005	1
HBB	11p15.4	1.26303	1.51e-07	7.85e-07	1
HCAR2	12q24.31	1.21457	2.15e-08	1.32e-07	1
HCK	20q11.21	0.375578	0.01139	0.0215432	1
HDAC10	22q13.33	-0.414885	0.00140934	0.00332838	1
HDAC11	3p25.1	0.16089	0.0191154	0.0342865	1
HDAC8	Xq13.1	-0.185103	4.61e-05	0.000148551	1
HDDC3	15q26.1	-0.251804	0.00296727	0.00650498	1
HDGF	1q23.1	-0.208858	0.00011429	0.00033888	1
HEATR5A	14q12	-0.231966	0.00858537	0.0167437	1
HECTD2	10q23.32	0.690448	3.65e-11	3.95e-10	1
HEMK1	3p21.31	-0.181303	0.00862693	0.0168105	1
HEPACAM2	7q21.2	0.600183	0.0207815	0.0368374	1
HERC5	4q22.1	0.293776	0.00810292	0.0159021	1
HERPUD2	7p14.2	0.138674	0.000577937	0.0014827	1
HEXB	5q13.3	-0.397061	0.000265792	0.000731047	1
HIF1AN	10q24.31	0.166478	0.000866883	0.00213768	1
HK3	5q35.2	-0.605943	0.00151752	0.00355969	1
HLA-DMB	6p21.32	-1.25157	7.69e-07	3.48e-06	1
HLF	17q22	0.907823	3.91e-08	2.28e-07	1
HMBS	11q23.3	-0.295785	0.00076094	0.00190137	1
HMGXB4	22q12.3	-0.27786	0.000303238	0.0008242	1
HOGA1	10q24.2	1.89086	7.27e-19	4.1e-17	1
HOXA10	7p15.2	-0.374051	0.00104495	0.0025334	1
HOXA9	7p15.2	-0.66525	2.52e-07	1.25e-06	1
HOXD10	2q31.1	1.14147	1.92e-07	9.81e-07	1
HOXD8	2q31.1	0.873313	3.89e-08	2.27e-07	1
HPN	19q13.11	-2.73266	4.88e-39	1.29e-35	1
HPS5	11p15.1	0.195404	0.00208556	0.00474068	1
HR	8p21.3	1.12792	2.01e-09	1.51e-08	1
HS3ST2	16p12.2	-0.815379	5.4e-05	0.000171109	1
HSD17B4	5q23.1	-0.411565	0.000625719	0.00159242	1
HSPB2	11q23.1	1.43289	3.27e-13	5.5e-12	1
HSPBAP1	3q21.1	-0.178748	0.0137761	0.0255604	1
HSPD1	2q33.1	-0.604078	4.62e-12	6.04e-11	1
HTR7	10q23.31	0.475103	0.0126356	0.023613	1
HTRA1	10q26.13	0.6553	1.51e-08	9.55e-08	1
HUNK	21q22.11	1.48592	1.49e-12	2.17e-11	1
HYAL3	3p21.31	-0.338859	0.000681443	0.00172117	1
HYLS1	11q24.2	-0.342071	2.11e-05	7.3e-05	1
ICAM1	19p13.2	-0.495999	0.00324203	0.00704447	1
IFIT1	10q23.31	0.47423	0.0168186	0.0305504	1
IFIT3	10q23.31	0.748448	7.09e-05	0.000218726	1
IGHV1-18	14q32.33	-1.09628	0.00512054	0.0105656	1
IL17RB	3p21.1	-0.649957	1.25e-11	1.5e-10	1
IL1RAPL1	Xp21.3-p21.2	-0.99077	0.00154235	0.00360964	1
IL27RA	19p13.12	0.581401	1.19e-05	4.32e-05	1
IL5RA	3p26.2	-1.02455	0.00989975	0.0190212	1
IMP4	2q21.1	-0.190063	0.00445176	0.00935321	1
IMPDH2	3p21.31	-0.76214	1.66e-12	2.4e-11	1
IMPG1	6q14.1	-0.966332	1.16e-05	4.23e-05	1
INPPL1	11q13.4	-0.320633	3.53e-11	3.83e-10	1
INTS2	17q23.2	0.249815	0.00169695	0.00393154	1
IPO5	13q32.2	0.154566	0.00695122	0.0138693	1
IQSEC3	12p13.33	1.21211	4.07e-08	2.36e-07	1
IRF2BP1	19q13.32	-0.305369	5.85e-05	0.000183804	1
IRX2	5p15.33	-0.937049	1.45e-10	1.39e-09	1
IRX4	5p15.33	-1.99854	1.1e-10	1.09e-09	1
ITFG2	12p13.33	0.426675	1.14e-10	1.11e-09	1
ITGA7	12q13.2	0.774731	8.13e-06	3.04e-05	1
ITIH6	Xp11.22	-1.20979	6.89e-06	2.61e-05	1
ITPK1	14q32.12	0.405298	1.1e-06	4.83e-06	1
ITSN2	2p23.3	0.17434	0.00575994	0.0117325	1
JADE2	5q31.1	0.585766	1.63e-10	1.54e-09	1
JAKMIP1	4p16.1	0.79953	0.00143539	0.00338253	1
KANK2	19p13.2	1.03064	6.15e-14	1.2e-12	1
KANSL3	2q11.2	0.338715	6.77e-16	2.04e-14	1
KAT5	11q13.1	0.190308	1.45e-05	5.17e-05	1
KAZN	1p36.21	0.49187	8.92e-08	4.86e-07	1
KCNC2	12q21.1	-1.2623	0.00941255	0.0181742	1
KCND3	1p13.2	-0.37803	0.00229711	0.00516927	1
KCNG1	20q13.13	0.904641	1.19e-07	6.33e-07	1
KCNH6	17q23.3	-0.982544	0.00394552	0.00839875	1
KCNK3	2p23.3	1.31078	7.54e-07	3.42e-06	1
KCNMA1	10q22.3	1.14471	9.8e-11	9.77e-10	1
KCNQ1	11p15.5-p15.4	0.577518	4.76e-05	0.000152667	1
KCNS3	2p24.2	-0.787717	1.14e-06	5e-06	1
KIAA0556	16p12.1	-0.419609	2.01e-09	1.51e-08	1
KIAA0895	7p14.2	-0.291828	0.0012911	0.00307317	1
KIAA1147	7q34	-0.439938	6.05e-09	4.13e-08	1
KIAA1257	3q21.3	-0.595224	3.62e-05	0.000119562	1
KIAA1328	18q12.2	0.145998	0.0293351	0.0499342	1
KIF12	9q32	-0.529544	0.0274691	0.0471147	1
KIF4A	Xq13.1	-1.58126	8.94e-15	2.1e-13	1
KLC2	11q13.2	-0.191695	0.0034886	0.00752874	1
KLF10	8q22.3	0.654332	0.00010952	0.00032589	1
KLHL21	1p36.31	0.461614	1.49e-09	1.15e-08	1
KLHL3	5q31.2	0.505798	0.00152626	0.00357837	1
KNOP1	16p12.3	-0.192899	0.00234543	0.00526131	1
KRI1	19p13.2	-0.141844	0.0107095	0.020409	1
KRIT1	7q21.2	0.224071	0.00129951	0.00309158	1
KRT13	17q21.2	3.10994	4.17e-09	2.94e-08	1
KRT5	12q13.13	2.14332	2.88e-07	1.42e-06	1
L3MBTL3	6q23.1	-0.525712	3.36e-10	2.97e-09	1
LAP3	4p15.32	-0.204112	0.00205782	0.00468515	1
LARP4B	10p15.3	-0.292418	1.86e-08	1.15e-07	1
LASP1	17q12	0.262087	0.00303224	0.00663321	1
LDB3	10q23.2	1.52816	2.7e-10	2.43e-09	1
LEPR	1p31.3	0.644503	6.99e-05	0.000215921	1
LETMD1	12q13.12	-0.241761	2.74e-05	9.28e-05	1
LGALSL	2p14	-0.332959	0.000266487	0.00073274	1
LIMD1	3p21.31	-0.181598	0.00584473	0.0118908	1
LLGL1	17p11.2	0.212998	0.001663	0.00386355	1
LMBRD1	6q13	0.239568	0.000234873	0.000653811	1
LMX1B	9q33.3	-2.4751	1.42e-20	1.16e-18	1
LONP1	19p13.2	-0.219	0.00105584	0.00255812	1
LOXL2	8p21.3	0.485082	0.000291466	0.000793373	1
LPA	6q25.3-q26	0.785875	0.000598343	0.00152961	1
LPAR1	9q31.3	1.04074	9.07e-12	1.11e-10	1
LPIN2	18p11.31	-0.224313	0.00269369	0.00595839	1
LRBA	4q31.3	-0.494045	3.39e-06	1.37e-05	1
LRCH1	13q14.13-q14.2	0.301382	0.00065574	0.00166286	1
LRFN5	14q21.1	1.01407	1.5e-06	6.43e-06	1
LRRC2	3p21.31	1.06908	1.38e-05	4.93e-05	1
LRRC41	1p34.1-p33	-0.0983145	0.0270185	0.0464898	1
LRRC56	11p15.5	-0.898523	1.1e-15	3.15e-14	1
LRRC75A-AS1	17p11.2	-0.492685	3.61e-06	1.45e-05	1
LRRC8C	1p22.2	0.272024	0.0256786	0.0444616	1
LSG1	3q29	0.136561	0.0056331	0.0115111	1
LUZP2	11p14.3	-3.04973	2.75e-25	5.38e-23	1
LXN	3q25.32	0.403669	0.0142738	0.026367	1
LZTS1	8p21.3	0.310181	0.0288442	0.0492031	1
MAB21L1	13q13.3	0.80923	0.00997054	0.0191413	1
MAD1L1	7p22.3	-0.249701	0.00882339	0.0171607	1
MAK	6p24.2	-1.04849	4.2e-09	2.95e-08	1
MAML1	5q35.3	-0.153784	0.00840888	0.0164413	1
MAML2	11q21	0.842977	1.6e-08	1e-07	1
MAN2A2	15q25	-0.318953	1.37e-05	4.91e-05	1
MAN2C1	15q24.2	-0.21739	0.00335395	0.00726452	1
MAP1B	5q13.2	1.10978	7.92e-10	6.43e-09	1
MAP3K13	3q27.2	-0.245152	1.98e-05	6.91e-05	1
MAP3K3	17q23.3	0.288647	3.18e-07	1.55e-06	1
MAP4K4	2q11.2	-0.386731	2.26e-08	1.38e-07	1
MAPK10	4q21.3	0.339016	0.019311	0.0345868	1
MAPKAP1	9q33.3	0.135228	0.000358356	0.000960411	1
MARS2	2q33.1	-0.668222	2.07e-10	1.92e-09	1
MATN2	8q22.1-q22.2	0.81942	2.69e-07	1.33e-06	1
MB21D2	3q29	0.75728	9.49e-09	6.23e-08	1
MCM3	6p12.2	0.383311	2.07e-12	2.92e-11	1
MCM5	22q12.3	0.186835	0.00385379	0.00822344	1
MCMDC2	8q13.1	-0.933565	5.05e-16	1.56e-14	1
MECP2	Xq28	0.310612	2.4e-09	1.77e-08	1
MED23	6q23.2	-0.168512	0.0218373	0.03852	1
METRN	16p13.3	0.453341	0.000742101	0.00185959	1
METTL4	18p11.32	0.305101	9.99e-08	5.4e-07	1
METTL7A	12q13.12	1.05562	1.94e-15	5.28e-14	1
MFN1	3q26.33	-0.158888	0.0177106	0.032019	1
MFN2	1p36.22	0.45867	3.44e-17	1.38e-15	1
MFSD2A	1p34.2	2.43231	1.28e-22	1.67e-20	1
MGAT5B	17q25.2	-1.33634	3.24e-08	1.92e-07	1
MGRN1	16p13.3	-0.219753	5.06e-07	2.37e-06	1
MIR99AHG	21q21.1	0.523024	0.000730853	0.00183515	1
MKKS	20p12.2	0.304212	4.2e-08	2.44e-07	1
MLPH	2q37.3	-0.914735	5.64e-15	1.38e-13	1
MN1	22q12.1	0.749496	0.000240877	0.00066891	1
MOCS1	6p21.2	0.339564	0.00536191	0.0110155	1
MOGAT2	11q13.5	0.422257	0.025746	0.0445616	1
MOGS	2p13.1	-0.678547	3.01e-22	3.63e-20	1
MORC2	22q12.2	-0.269289	3.41e-10	3.01e-09	1
MORF4L2	Xq22.2	0.183675	0.000130115	0.000382052	1
MPND	19p13.3	-0.321416	0.000219709	0.000615787	1
MRPL13	8q24.12	-0.175385	0.0207907	0.0368502	1
MRPL45	17q12	-0.210362	0.00037251	0.000994872	1
MSLN	16p13.3	2.42465	5.7e-13	9.1e-12	1
MTFR1	8q13.1	-0.273672	0.000798459	0.00198569	1
MTG1	10q26.3	-0.672262	2.6e-09	1.91e-08	1
MTHFD1	14q23.3	-0.263746	7.71e-05	0.000236161	1
MTR	1q43	0.259217	0.000364481	0.000975407	1
MTX1	1q22	-0.188773	0.00200638	0.00457991	1
MX1	21q22.3	0.67508	0.000329178	0.000889195	1
MXD4	4p16.3	-0.331454	5.48e-06	2.12e-05	1
MYB	6q23.3	-0.846969	4.35e-07	2.07e-06	1
MYH11	16p13.11	1.40376	3.45e-09	2.47e-08	1
MYNN	3q26.2	0.199906	9.78e-05	0.000293879	1
MYO3B	2q31.1	0.820507	0.000111372	0.000330867	1
MYO5A	15q21.2	-0.28884	0.00182552	0.00419773	1
MYRIP	3p22.1	-1.38424	6.01e-20	4.15e-18	1
N4BP2	4p14	-0.3243	0.00144484	0.00340262	1
NAALAD2	11q14.3	0.820593	6.87e-06	2.6e-05	1
NACA	12q23-q24.1	-0.244344	0.000836451	0.00206929	1
NADK2	5p13.2	-0.180273	0.00592132	0.0120307	1
NAP1L5	4q22.1	0.497664	0.000159329	0.00045984	1
NBPF15	1q21.1	-0.582032	0.000233083	0.000649712	1
NCALD	8q22.3	-0.842793	4.18e-05	0.000136023	1
NCAPG	4p15.31	-1.16625	6.34e-10	5.27e-09	1
NCAPG2	7q36.3	-0.317006	0.000843228	0.00208465	1
NCK2	2q12.2	0.124593	0.0208041	0.0368632	1
NCKAP1L	12q13.13-q13.2	0.482649	0.00198355	0.00453453	1
NCKAP5L	12q13.12	0.609968	8.05e-07	3.64e-06	1
NCL	2q37.1	-0.340097	8.66e-12	1.07e-10	1
NDC1	1p32.3	-0.268063	0.000122543	0.000361316	1
NEGR1	1p31.1	0.853411	1.19e-05	4.31e-05	1
NEK1	4q33	-0.228921	0.0279517	0.0478668	1
NEK5	13q14.3	-1.92791	1.45e-25	3.04e-23	1
NELFCD	20q13.32	-0.331941	1.27e-09	9.95e-09	1
NETO2	16q12.1	-2.06868	5.99e-26	1.4e-23	1
NEURL1	10q24.33	0.707078	0.000419528	0.00110776	1
NFASC	1q32.1	0.455212	0.00433093	0.0091243	1
NFATC2	20q13.2	0.51642	0.000266234	0.000732152	1
NFATC2IP	16p11.2	-0.0877869	0.0282374	0.0482931	1
NHS	Xp22.2-p22.13	1.18347	2.37e-13	4.09e-12	1
NIN	14q22.1	-0.348318	8.23e-07	3.71e-06	1
NINL	20p11.21	0.576737	0.000449036	0.00117841	1
NIPA2	15q11.2	-0.306264	0.00267945	0.00592974	1
NIPSNAP3B	9q31.1	0.607376	1.06e-07	5.71e-07	1
NIT2	3q12.2	-0.330589	1.12e-07	6.01e-07	1
NKAPL	6p22.1	1.73433	3.09e-18	1.5e-16	1
NOC2L	1p36.33	-0.4244	1.68e-12	2.42e-11	1
NOD1	7p14.3	0.328633	0.000622975	0.00158632	1
NOD2	16q12.1	0.750316	1.12e-05	4.09e-05	1
NOP16	5q35.2	-0.588479	9.02e-10	7.24e-09	1
NOS1AP	1q23.3	0.390367	0.0088797	0.0172556	1
NOX4	11q14.3	-1.38541	1.48e-09	1.14e-08	1
NPY1R	4q32.2	0.768604	1.14e-06	4.98e-06	1
NPY4R	10q11.22	-1.91427	1.42e-07	7.43e-07	1
NR2F2	15q26.2	0.217972	0.00343137	0.00741392	1
NRIP2	12p13.33	0.301613	0.00119222	0.00285773	1
NRXN1	2p16.3	1.48444	3.03e-08	1.8e-07	1
NT5DC2	3p21.1	0.456767	3.72e-05	0.000122256	1
NT5E	6q14.3	1.15589	2.81e-12	3.82e-11	1
NUMBL	19q13.2	0.250996	0.00276423	0.00610124	1
NYAP1	7q22.1	1.16408	7.32e-13	1.14e-11	1
OAT	10q26.13	0.838617	4.39e-09	3.08e-08	1
OIP5	15q15.1	-0.346527	0.0147669	0.0271636	1
OLFM2	19p13.2	-0.643865	5.99e-06	2.3e-05	1
OLFM4	13q14.3	1.44448	0.00606126	0.0122892	1
OMA1	1p32.2-p32.1	-0.231582	0.000339253	0.000913333	1
OPRL1	20q13.33	0.365478	0.00107813	0.00260698	1
OVGP1	1p13.2	-0.850045	5.52e-07	2.57e-06	1
OXSR1	3p22.2	0.148891	0.00530838	0.0109141	1
P4HA1	10q22.1	-0.466578	1.63e-07	8.45e-07	1
PABPC1L	20q13.12	-0.635908	0.00144053	0.00339291	1
PABPN1	14q11.2	-0.280817	0.000679041	0.0017158	1
PACSIN1	6p21.3	-0.454784	0.000911281	0.0022355	1
PANK1	10q23.31	0.556833	0.000282445	0.000771324	1
PAQR5	15q23	1.40033	2.21e-20	1.71e-18	1
PARD6A	16q22.1	-0.342042	0.00340575	0.00736288	1
PARP11	12p13.32	-0.443329	6.36e-08	3.55e-07	1
PATZ1	22q12.2	-0.286928	0.000342039	0.000919892	1
PAX1	20p11.22	-2.57788	7.66e-08	4.22e-07	1
PBX4	19p13.11	0.476432	0.00231506	0.00520203	1
PCDHGA5	5q31	-1.01198	0.00013809	0.00040303	1
PCED1B	12q13.11	0.738082	1.43e-06	6.14e-06	1
PCK2	14q11.2-q12	0.305959	0.00074686	0.00187024	1
PDE1B	12q13.2	0.791725	3.28e-08	1.94e-07	1
PDE7A	8q13.1	-0.249267	0.00533715	0.0109683	1
PDE9A	21q22.3	-0.541585	3.27e-05	0.00010914	1
PDK1	2q31.1	-0.188832	0.0283987	0.048515	1
PECR	2q35	0.300127	0.00621521	0.0125572	1
PER2	2q37.3	0.526775	3.59e-06	1.44e-05	1
PEX19	1q23.2	0.166521	0.000680878	0.00171997	1
PGK1	Xq21.1	0.219349	0.0022291	0.00503158	1
PGM2	4p14	-0.207341	0.0160634	0.0293435	1
PHACTR1	6p24.1	0.319791	0.0108255	0.0205959	1
PHEX	Xp22.11	0.527862	0.00044683	0.00117296	1
PHF8	Xp11.22	-0.541251	8.22e-08	4.5e-07	1
PHKA1	Xq13.1	-0.284649	3.03e-06	1.23e-05	1
PHYHIPL	10q21.1	1.94715	5.11e-21	4.66e-19	1
PIAS4	19p13.3	-0.245089	7.75e-07	3.51e-06	1
PID1	2q36.3	0.349277	0.0245991	0.0428017	1
PINK1	1p36.12	0.317595	0.00011449	0.000339362	1
PIPOX	17q11.2	1.05297	2.38e-14	5.12e-13	1
PIWIL2	8p21.3	0.754305	0.000122027	0.000360025	1
PKD2	4q22.1	0.53858	1.49e-07	7.75e-07	1
PLCL2	3p24.3	0.787692	4.69e-08	2.69e-07	1
PLD3	19q13.2	0.265668	4.93e-05	0.000157587	1
PLEKHA4	19q13.33	0.424964	0.00264119	0.00585842	1
PLEKHF2	8q22.1	0.364509	0.000262469	0.000722877	1
PLEKHG2	19q13.2	0.314471	0.00761216	0.0150415	1
PLEKHO1	1q21.2	0.714754	4.28e-08	2.48e-07	1
PLK1	16p12.2	-0.867266	2.5e-08	1.51e-07	1
PLOD1	1p36.22	-0.196164	0.00494276	0.0102527	1
PLTP	20q13.12	0.406673	0.0219113	0.0386356	1
PLXNA4	7q32.3	0.968302	6.26e-07	2.88e-06	1
PLXNC1	12q22	0.353863	0.0136246	0.0253125	1
PNPLA4	Xp22.31	-0.139238	0.0236127	0.0412528	1
PNPLA8	7q31.1	0.236674	0.000366691	0.000980468	1
POC1B	12q21.33	0.211484	0.000137701	0.000402047	1
POF1B	Xq21.1	1.39094	2.55e-05	8.72e-05	1
POGZ	1q21.3	-0.167615	0.00673973	0.0134839	1
POLDIP2	17q11.2	-0.138157	0.0114547	0.0216455	1
POLR1C	6p21.1	-0.365429	5.21e-08	2.96e-07	1
POLR3C	1q21.1	0.19167	8.85e-06	3.29e-05	1
POM121C	7q11.23	-0.351578	1.65e-09	1.27e-08	1
POMT1	9q34.13	-0.274744	5.03e-06	1.96e-05	1
POP1	8q22.2	-0.244423	0.00075103	0.00187967	1
POTEH	22q11.1	-1.08576	0.000757491	0.00189404	1
PPIC	5q23.2	0.95102	1.58e-13	2.79e-12	1
PPIP5K1	15q15.3	-0.373752	2.9e-08	1.74e-07	1
PPM1L	3q25.33-q26.1	0.590976	5.8e-07	2.69e-06	1
PPP1R15A	19q13.2	0.421559	0.00549196	0.0112564	1
PPP1R18	6p21.33	0.539061	8.24e-06	3.08e-05	1
PPP1R8	1p35.3	0.0784159	0.0221778	0.0390533	1
PPP1R9A	7q21.3	-0.896355	1.93e-19	1.22e-17	1
PPP2R5B	11q13.1	0.388619	1.87e-09	1.41e-08	1
PPP3CC	8p21.3	0.193746	0.00419949	0.00887683	1
PRC1	15q26.1	-0.689299	1.67e-08	1.04e-07	1
PRDM11	11p11.2	0.856407	4.31e-20	3.1e-18	1
PRDM5	4q27	0.834703	2.41e-10	2.21e-09	1
PREP	6q21	-0.49326	1.93e-09	1.45e-08	1
PRICKLE2	3p14.1	1.25472	3.8e-15	9.75e-14	1
PRKAA2	1p32.2	-0.349886	0.00374969	0.00802454	1
PRKCB	16p12.2-p12.1	1.52639	1.09e-12	1.62e-11	1
PROM2	2q11.1	0.357508	0.00953545	0.0183961	1
PRPF19	11q12.2	-0.235239	1.01e-05	3.72e-05	1
PRPSAP1	17q25.1	-0.204782	0.000363898	0.000973988	1
PRR22	19p13.3	-0.571703	7.87e-05	0.000240699	1
PRR4	12p13	-0.806143	0.00145634	0.0034262	1
PRRG1	Xp21.1	0.694263	2.7e-07	1.34e-06	1
PSD3	8p22	-0.4486	0.000582842	0.00149445	1
PSPC1	13q12.11	-0.17044	0.000299246	0.000813589	1
PTGR2	14q24.3	-0.200372	0.00637569	0.0128406	1
PTHLH	12p11.22	0.529747	0.0023645	0.00530149	1
PTPN21	14q31	0.403065	3.77e-06	1.5e-05	1
PTPRB	12q15	0.342683	0.0100052	0.0191897	1
PTPRJ	11p11.2	-0.586789	7.85e-11	7.94e-10	1
PTPRT	20q12-q13.11	-1.48385	1.35e-05	4.84e-05	1
PXN	12q24.23	-0.284014	0.000208967	0.000587736	1
PYGM	11q13.1	1.11872	1.01e-06	4.47e-06	1
QSER1	11p13	0.392209	0.00425783	0.00898881	1
QTRT1	19p13.3	-0.51673	2.86e-07	1.41e-06	1
RAB11FIP4	17q11.2	-0.298966	0.000183961	0.000523153	1
RAB17	2q37.3	-1.46696	2.09e-28	7.39e-26	1
RAB38	11q14.2	1.53231	5.85e-17	2.21e-15	1
RAB40A	Xq22.2	1.16591	1.16e-10	1.13e-09	1
RAB6C	2q21.1	-1.37312	3.71e-21	3.44e-19	1
RABGAP1	9q33.2-q33.3	0.328241	8.45e-10	6.82e-09	1
RABGGTA	14q11.2	-0.230837	0.000529419	0.00136928	1
RAP1GDS1	4q23	0.199065	0.000233993	0.000651936	1
RAPGEF1	9q34.13	0.143602	0.0261448	0.0451628	1
RAPGEF4	2q31.1	-0.782219	1.29e-06	5.58e-06	1
RAPGEF6	5q31.1	-0.289046	8.34e-07	3.75e-06	1
RASA3	13q34	0.266441	0.010749	0.0204653	1
RASEF	9q21.32	-0.7385	7.5e-11	7.64e-10	1
RASGRF1	15q25.1	1.51554	1.42e-12	2.07e-11	1
RASL11B	4q12	1.47027	3.17e-14	6.64e-13	1
RASSF7	11p15.5	-0.5018	0.00019848	0.00056055	1
RAVER1	19p13.2	-0.25735	0.0191901	0.0343969	1
RBFOX2	22q12.3	0.514016	2.47e-14	5.29e-13	1
RBM15	1p13.3	-0.190114	0.000394843	0.00104904	1
RBM15B	3p21.2	-0.394135	7.51e-14	1.45e-12	1
RBM28	7q32.1	-0.124035	0.0101967	0.0195165	1
RBM39	20q11.22	-0.246183	2.5e-06	1.03e-05	1
RBM5	3p21.31	-0.244018	0.000467245	0.00122237	1
RBPJ	4p15.2	0.261516	1.18e-05	4.3e-05	1
RBPMS2	15q22.31	1.06106	1.43e-11	1.68e-10	1
RCBTB2	13q14.2	0.657618	1.36e-13	2.45e-12	1
RCHY1	4q21.1	-0.239279	2.09e-05	7.24e-05	1
RCSD1	1q24.2	0.61215	8.21e-05	0.000250046	1
RELL2	5q31.3	-0.660619	4.29e-07	2.05e-06	1
RFX1	19p13.12	0.180394	0.00453036	0.0094971	1
RFX3	9p24.2	-1.01215	1.05e-13	1.96e-12	1
RGS10	10q26.11	-1.00781	8.2e-17	3.03e-15	1
RGS7BP	5q12.3	1.00983	7.36e-06	2.78e-05	1
RGS9	17q24.1	1.44814	8.73e-12	1.08e-10	1
RHOBTB2	8p21.3	0.76302	3.27e-16	1.06e-14	1
RHOC	1p13.2	0.364726	1.51e-05	5.38e-05	1
RHOJ	14q23.2	0.593957	1.2e-05	4.35e-05	1
RHPN2	19q13.12	-1.01408	1.75e-14	3.86e-13	1
RILPL2	12q24.31	0.548047	2.1e-09	1.57e-08	1
RIPK3	14q12	0.97571	2.72e-09	1.99e-08	1
RNF103	2p11.2	-0.236193	8.03e-05	0.000245193	1
RNF122	8p12	0.465462	0.00013953	0.000406973	1
RNF207	1p36.31	0.444628	0.00263959	0.00585558	1
RNF216	7p22.1	0.219233	6.33e-06	2.41e-05	1
ROBO3	11q24.2	0.580489	0.000765887	0.00191243	1
ROCK2	2p25.1	0.476592	5.56e-09	3.82e-08	1
RPA1	17p13.3	0.162088	0.000540634	0.00139555	1
RPA2	1p35.3	0.282195	1.67e-07	8.62e-07	1
RPAP2	1p22.1	-0.200455	0.000807474	0.00200514	1
RPE	2q34	0.12721	0.0236378	0.0412928	1
RPL28	19q13.4	-0.461716	2.34e-05	8.03e-05	1
RPL31	2q11.2	-0.351906	9.89e-05	0.000296963	1
RPL8	8q24.3	-0.272527	0.0135124	0.0251242	1
RPS6KB2	11q13.2	-0.219568	0.0038892	0.00828845	1
RPSA	3p22.1	-0.236878	0.0162195	0.0295963	1
RPTOR	17q25.3	0.24494	1.8e-05	6.32e-05	1
RPUSD4	11q24.2	-0.332609	2.08e-08	1.28e-07	1
RRBP1	20p12.1	-0.230892	0.00507601	0.0104913	1
RRP12	10q24.1	-0.651808	8.21e-15	1.93e-13	1
RSAD2	2p25.2	0.399937	0.0219376	0.0386746	1
RSL1D1	16p13.13	-0.254433	6.05e-05	0.000189446	1
RSPO3	6q22.33	0.948788	0.000145262	0.000421957	1
RTTN	18q22.1	0.378435	5.76e-05	0.000181403	1
RUNDC3B	7q21.12	0.44924	0.000982137	0.00239323	1
RUSC2	9p13.3	0.739455	3e-12	4.06e-11	1
RWDD4	4q35.1	-0.237864	1.06e-05	3.91e-05	1
RXFP1	4q32.1	0.651021	0.000392383	0.00104311	1
RXRB	6p21.32	0.112387	0.000620472	0.00158126	1
RYK	3q22.2	0.286066	2.78e-09	2.03e-08	1
S1PR2	19p13.2	0.317619	0.00212706	0.00482847	1
S1PR5	19p13.2	1.64434	1.29e-11	1.53e-10	1
SAMD14	17q21.33	0.927243	6.45e-09	4.38e-08	1
SAP130	2q14.3	-0.15854	0.00290275	0.00637948	1
SART3	12q23.3	-0.102262	0.0240456	0.0419495	1
SBNO2	19p13.3	-0.384884	6.87e-05	0.000212518	1
SCD	10q24.31	-0.625981	0.0050129	0.0103788	1
SCGB1A1	11q12.3	2.36576	1.29e-06	5.58e-06	1
SCMH1	1p34.2	-0.124233	0.0149098	0.0274018	1
SCN2B	11q23.3	1.49716	2.09e-10	1.94e-09	1
SCN3B	11q24.1	0.576438	0.00653001	0.013117	1
SCN9A	2q24.3	0.672642	0.00144047	0.00339291	1
SCUBE3	6p21.3	0.841438	1.8e-06	7.6e-06	1
SDF4	1p36.33	-0.249936	0.000169165	0.000485497	1
SEC16A	9q34.3	-0.849515	2e-25	4e-23	1
SEC23A	14q21.1	0.89666	1.39e-17	6.04e-16	1
SEC23B	20p11.23	-0.44963	1.9e-06	7.99e-06	1
SECISBP2	9q22.2	-0.40624	1.06e-13	1.97e-12	1
SEMA3A	7q21.11	1.24921	2.06e-08	1.27e-07	1
SERBP1	1p31.3	-0.246262	8.36e-07	3.76e-06	1
SERHL	22q13.2	-0.867577	2.31e-05	7.94e-05	1
SERPINE2	2q36.1	0.460649	0.00304421	0.00665702	1
SERPINF1	17p13.3	0.939151	1.19e-07	6.34e-07	1
SESTD1	2q31.2	0.480312	1.26e-09	9.89e-09	1
SGCE	7q21.3	1.07048	1.69e-12	2.43e-11	1
SGK1	6q23.2	1.26034	3.51e-07	1.7e-06	1
SH2D3C	9q34.11	0.320991	0.0107179	0.0204229	1
SH3BP1	22q13.1	0.905019	3.77e-12	5.02e-11	1
SHF	15q21.1	0.81614	2.29e-15	6.16e-14	1
SHMT1	17p11.2	0.459167	7.33e-10	6.01e-09	1
SHMT2	12q12-q14	-0.572042	3.71e-10	3.25e-09	1
SIK2	11q23.1	-0.150999	0.0281454	0.0481538	1
SIM2	21q22.13	-3.10503	2.64e-55	4.87e-51	1
SIRPA	20p13	0.61796	1.48e-08	9.36e-08	1
SLC12A9	7q22.1	-0.264362	9.65e-05	0.0002904	1
SLC14A1	18q12.3	1.59908	4.13e-07	1.97e-06	1
SLC16A10	6q21	-0.47306	0.00294595	0.00646285	1
SLC17A5	6q13	-0.542138	8.35e-08	4.57e-07	1
SLC19A1	21q22.3	-1.4818	4.81e-35	5.91e-32	1
SLC25A10	17q25.3	-0.812239	1.79e-10	1.68e-09	1
SLC25A42	19p13.11	-0.864686	5.21e-17	1.99e-15	1
SLC25A51	9p13.2-p13.1	-0.153852	0.0143406	0.0264817	1
SLC26A1	4p16.3	-0.932719	1.15e-14	2.64e-13	1
SLC30A4	15q21.1	-0.927857	1.19e-07	6.34e-07	1
SLC35E1	19p13.11	-0.470062	5.12e-12	6.62e-11	1
SLC35F3	1q42.2	-0.979527	2.6e-07	1.29e-06	1
SLC35F5	2q14.1	-0.446429	7.25e-07	3.3e-06	1
SLC35G1	10q23.33	0.371835	0.00139807	0.00330388	1
SLC37A1	21q22.3	-0.880616	7.33e-15	1.75e-13	1
SLC37A3	7q34	-0.562871	1.38e-11	1.63e-10	1
SLC38A4	12q13.11	1.29358	0.000208593	0.000586774	1
SLC38A7	16q21	-0.184779	0.0114272	0.0216068	1
SLC44A2	19p13.2	0.228173	3.47e-05	0.000115113	1
SLC45A2	5p13.2	-4.27853	7.05e-27	1.94e-24	1
SLC4A11	20p13	1.13828	1.28e-11	1.52e-10	1
SLC4A3	2q35	0.256413	0.0138589	0.0257011	1
SLC4A5	2p13.1	-0.251205	0.00473156	0.00986347	1
SLC9A1	1p36.11	0.487387	1.35e-09	1.05e-08	1
SLC9A2	2q12.1	-0.572994	1.79e-05	6.29e-05	1
SLC9A3	5p15.33	-0.590434	0.0283188	0.048401	1
SLCO5A1	8q13.3	-1.08465	2.31e-07	1.16e-06	1
SLK	10q24.33-q25.1	0.144024	0.0292193	0.0497739	1
SLMAP	3p14.3	0.876951	8.89e-22	9.58e-20	1
SMAD2	18q21.1	0.156772	0.002829	0.00622927	1
SMARCA2	9p24.3	0.221993	0.00760604	0.015031	1
SMG6	17p13.3	0.284551	0.0068089	0.013606	1
SMPDL3A	6q22.31	-0.499851	4.83e-05	0.000154629	1
SMPDL3B	1p35.3	-2.05381	6.1e-33	4.89e-30	1
SNAI3	16q24.3	0.280818	0.0229061	0.0401566	1
SND1	7q32.1	-0.545887	2.94e-13	4.99e-12	1
SNPH	20p13	1.1532	3.9e-12	5.16e-11	1
SNRPA	19q13.1	-0.188327	0.0105259	0.0200819	1
SNX22	15q22.31	-0.784734	1.33e-05	4.78e-05	1
SOCS6	18q22.2	0.295738	8.26e-05	0.000251323	1
SOX17	8q11.23	0.546061	0.00377591	0.00807315	1
SPAG5	17q11.2	-0.639771	1.93e-06	8.1e-06	1
SPAG8	9p13.3	0.382595	0.00267216	0.00592044	1
SPATA18	4q12	1.21534	1.65e-09	1.26e-08	1
SPC24	19p13.2	-0.826104	5.48e-07	2.55e-06	1
SPHK2	19q13.33	-0.232392	0.00154208	0.00360947	1
SPPL2B	19p13.3	-0.298892	0.000860549	0.00212377	1
SPTBN4	19q13.13	-0.346811	0.00471124	0.00982335	1
SPTBN5	15q21	0.403171	0.0112534	0.0213198	1
SPTLC2	14q24.3	-0.242533	0.000120378	0.000355558	1
SRPK3	Xq28	0.390751	0.0255373	0.0442545	1
SRPRB	3q22.1	-0.357846	4.95e-05	0.000158306	1
SRRM5	19q13.31	-0.300787	0.00797095	0.0156752	1
SSFA2	2q31.3	0.288296	0.00101259	0.00246109	1
SSPO	7q36.1	-1.0393	8.96e-08	4.87e-07	1
ST6GAL1	3q27.3	-0.747609	0.000484598	0.001264	1
ST6GAL2	2q12.3	0.946372	4.16e-05	0.00013541	1
ST6GALNAC1	17q25.1	-0.98734	9e-06	3.34e-05	1
ST6GALNAC2	17q25.1	1.56937	2.1e-17	8.83e-16	1
STAT2	12q13.2	-0.228974	5.62e-05	0.000177398	1
STK10	5q35.1	0.300763	0.00370137	0.00793218	1
STK38	6p21.31	0.205832	0.000205697	0.000579511	1
STK38L	12p11.23	0.301341	0.000259875	0.000716483	1
STK39	2q24.3	-0.771641	1.89e-09	1.43e-08	1
STXBP5L	3q13.33	1.4553	4.11e-09	2.9e-08	1
SUCLG1	2p11.2	0.283229	2.31e-07	1.16e-06	1
SUN2	22q13.1	-0.175795	0.00673001	0.0134659	1
SUSD2	22q11.23	0.510487	0.00377541	0.00807302	1
SWT1	1q25.3	-0.259718	0.000752641	0.00188293	1
SYCP2	20q13.33	-0.423919	0.00411116	0.00871511	1
SYDE1	19p13.12	0.869675	1.17e-09	9.24e-09	1
SYK	9q22.2	0.524074	0.000277654	0.000759366	1
SYMPK	19q13.32	-0.281795	4.59e-06	1.81e-05	1
SYNC	1p35.1	1.10946	5.61e-09	3.85e-08	1
SYNM	15q26.3	1.43271	2.01e-10	1.87e-09	1
SYNPO2	4q26	1.44769	1.39e-10	1.33e-09	1
SYP	Xp11.23	-0.412271	0.022878	0.0401251	1
SYT1	12q21.2	0.69957	0.0111917	0.0212248	1
SYT12	11q13.2	0.580238	0.00136722	0.00323638	1
SYT15	10q11.22	0.600241	0.00017539	0.000501566	1
SYT17	16p12.3	-0.771654	1.6e-13	2.83e-12	1
SYTL1	1p36.11	-0.278359	0.0292943	0.0498785	1
SYTL4	Xq22.1	0.517415	2.14e-07	1.08e-06	1
TACSTD2	1p32.1	-0.483834	1.67e-05	5.88e-05	1
TAF1D	11q21	-0.592963	2.14e-11	2.42e-10	1
TAF4	20q13.33	-0.225939	0.000329069	0.000889032	1
TAOK3	12q	-0.684988	6.62e-09	4.49e-08	1
TARBP2	12q13.13	-0.351726	3.35e-07	1.63e-06	1
TBC1D16	17q25.3	-0.514139	5.39e-06	2.09e-05	1
TBC1D20	20p13	0.139794	0.000621065	0.00158255	1
TBC1D31	8q24.13	-0.231475	0.0166264	0.0302429	1
TBXAS1	7q34	-0.586729	2.05e-05	7.11e-05	1
TCF3	19p13.3	-0.342532	5.74e-08	3.24e-07	1
TCF7L1	2p11.2	1.2408	8.13e-18	3.71e-16	1
TCN2	22q12.2	0.937215	7.57e-15	1.8e-13	1
TECR	19p13.12	0.41782	1.48e-07	7.69e-07	1
TENM2	5q34	0.941771	3.11e-06	1.27e-05	1
TFB2M	1q44	-0.323532	4.02e-06	1.6e-05	1
TGFBR1	9q22.33	0.302351	0.000504299	0.0013113	1
TGFBRAP1	2q12.1-q12.2	-0.311182	1.94e-06	8.14e-06	1
TGS1	8q12.1	0.18863	0.00592626	0.0120394	1
THEG	19p13.3	-0.848499	3.26e-05	0.000108803	1
THSD1	13q14.3	0.365923	0.00388253	0.00827615	1
THUMPD2	2p22.1	-0.224471	0.00232192	0.00521619	1
TICAM1	19p13.3	-0.169433	0.00504107	0.0104285	1
TIFA	4q25	-0.338492	0.00212457	0.0048246	1
TIGD2	4q22.1	-0.354996	4.2e-07	2.01e-06	1
TKT	3p21.1	-0.330225	0.000231802	0.000646729	1
TLCD1	17q11.2	-1.06458	1.6e-15	4.42e-14	1
TLE3	15q23	-0.456915	2.29e-13	3.96e-12	1
TLR1	4p14	0.804106	1.79e-05	6.29e-05	1
TM4SF18	3q25.1	0.391642	0.02738	0.0469727	1
TM6SF1	15q25.2	0.348085	0.0198	0.0353641	1
TM7SF2	11q13.1	-0.773413	2.56e-09	1.88e-08	1
TM9SF1	14q12	-0.262144	8.23e-05	0.000250657	1
TMC4	19q13.42	-0.514631	1.18e-08	7.57e-08	1
TMEM109	11q12.2	0.240336	5.21e-05	0.000165682	1
TMEM131	2q11.2	-0.249043	0.000223907	0.000626789	1
TMEM132B	12q24.31	0.738807	0.0004153	0.00109817	1
TMEM132E	17q12	0.693493	0.000444077	0.0011664	1
TMEM139	7q34	1.53411	1.3e-15	3.65e-14	1
TMEM168	7q31.1	-0.236673	0.00131899	0.00313387	1
TMEM181	6q25.3	-0.222955	0.00115821	0.00278201	1
TMEM214	2p23.3	-0.195146	0.00200009	0.00456669	1
TMEM245	9q31.3	0.321813	3.3e-05	0.00010988	1
TMEM40	3p25.2	2.25571	3.37e-11	3.67e-10	1
TMEM69	1p34.1	-0.309326	1.97e-07	1e-06	1
TMEM8A	16p13.3	-0.529691	3.75e-08	2.2e-07	1
TMTC4	13q32.3	-1.20162	4.14e-24	6.63e-22	1
TMX3	18q22	-0.149654	0.0229994	0.0402922	1
TNK2	3q29	-0.740472	5.06e-15	1.26e-13	1
TNKS1BP1	11q12.1	-0.14931	0.0130389	0.0243077	1
TNRC6B	22q13.1	-0.246661	0.000338915	0.000912556	1
TOM1L1	17q23.2	-0.498148	9.83e-08	5.32e-07	1
TOP3B	22q11.22	-0.35872	0.0205827	0.0365378	1
TOX3	16q12.1	-1.68737	4.93e-16	1.53e-14	1
TPGS2	18q12.2	0.144835	0.00857268	0.0167212	1
TPO	2p25.3	-2.48375	6.74e-18	3.1e-16	1
TPP1	11p15.4	-0.213789	0.00307453	0.00671536	1
TPPP3	16q22.1	0.566826	0.00757946	0.0149833	1
TPRG1	3q28	1.3047	1.04e-16	3.74e-15	1
TPST1	7q11.21	0.310432	0.00230858	0.00518937	1
TRAP1	16p13.3	-0.400602	1.38e-08	8.75e-08	1
TREX2	Xq28	0.816904	1.94e-09	1.46e-08	1
TRHDE	12q21.1	1.38427	2.65e-09	1.94e-08	1
TRIM11	1q42.13	-0.41618	3.78e-09	2.69e-08	1
TRIM16	17p12	0.63502	1.33e-11	1.58e-10	1
TRIM4	7q22.1	0.16697	0.00621859	0.0125606	1
TRIM52	5q35.3	-0.15831	0.0152042	0.0278872	1
TRIM6	11p15.4	1.17375	1.13e-12	1.69e-11	1
TRMU	22q13.31	-0.29419	0.000998312	0.00242895	1
TSPAN12	7q31.31	0.686334	3.11e-06	1.27e-05	1
TTLL5	14q24.3	0.22317	0.000178855	0.000510208	1
TULP1	6p21.31	0.963685	1.13e-08	7.29e-08	1
TULP4	6q25.3	-0.34421	1.07e-06	4.72e-06	1
TXLNB	6q24.1	-1.14375	4.08e-07	1.95e-06	1
TXNRD1	12q23.3	0.227589	0.00989159	0.0190075	1
UBAC1	9q34.3	0.406517	1.96e-12	2.78e-11	1
UBAP2L	1q21.3	-0.143842	0.0148369	0.0272733	1
UBD	6p22.1	-0.866995	0.00135434	0.00320753	1
UBE4B	1p36.22	-0.15127	0.00331336	0.00718843	1
UBN1	16p13.3	-0.274435	1.44e-07	7.52e-07	1
UGGT2	13q32.1	-0.232169	0.00125329	0.00299322	1
UGT1A3	2q37.1	-2.07567	1.19e-05	4.33e-05	1
UMPS	3q21.2	-0.249037	2.29e-06	9.53e-06	1
USP18	22q11.2	-0.49166	1.39e-05	4.97e-05	1
USP33	1p31.1	-0.203174	0.00422896	0.00893501	1
USP42	7p22.1	-0.285145	1.65e-06	7e-06	1
USP6	17p13.2	0.38351	0.00507284	0.0104859	1
UTP18	17q21.33	-0.230913	4.25e-05	0.000137911	1
VARS	6p21.33	-0.579191	2.58e-15	6.83e-14	1
VIPR2	7q36.3	0.779165	0.000381881	0.00101754	1
VPS29	12q24.11	0.231649	1.5e-06	6.42e-06	1
VRK3	19q13.33	-0.136395	0.024499	0.0426476	1
WASF1	6q21	-0.421765	3.51e-05	0.00011641	1
WDR37	10p15.3	-0.403389	9.39e-09	6.17e-08	1
WDR4	21q22.3	-0.326185	3.99e-05	0.000130387	1
WDR47	1p13.3	0.432913	1.94e-08	1.2e-07	1
WDR62	19q13.12	-0.447773	0.00332169	0.00720396	1
WDR82	3p21.2	0.351573	1.41e-11	1.66e-10	1
WISP2	20q13.12	1.97542	1.08e-09	8.55e-09	1
WNK4	17q21.2	-0.746272	0.00050025	0.00130133	1
WNT2	7q31.2	1.01908	0.000427507	0.00112673	1
WNT6	2q35	1.33129	3.9e-08	2.28e-07	1
WWC3	Xp22.2	0.832924	9.66e-22	1.04e-19	1
WWOX	16q23.1-q23.2	0.236701	0.00951335	0.0183573	1
XAF1	17p13.2	0.515759	0.0214697	0.0379115	1
YBX2	17p13.1	1.06425	7.49e-07	3.4e-06	1
YJEFN3	19p13.11	-0.869541	3.41e-05	0.000113184	1
YLPM1	14q24.3	-0.149964	0.0098812	0.0189895	1
YPEL1	22q11.21-q11.22	-1.31721	2.18e-30	1.09e-27	1
YPEL4	11q12.1	0.424751	0.00361058	0.00776652	1
YWHAH	22q12.3	0.312457	0.000131379	0.000385149	1
ZBED4	22q13.33	-0.585253	1.12e-15	3.19e-14	1
ZBTB20	3q13.31	0.456718	0.00218896	0.00495373	1
ZBTB3	11q12.3	-0.206795	0.00216334	0.00490055	1
ZBTB38	3q23	0.486632	1.76e-07	9.04e-07	1
ZBTB4	17p13.1	0.431928	3.41e-11	3.71e-10	1
ZBTB7C	18q21.1	1.29358	9.61e-12	1.17e-10	1
ZC3H7B	22q13.2	-0.250169	6.22e-05	0.000194383	1
ZCCHC2	18q21.33	-0.33781	5.4e-05	0.000171197	1
ZCCHC3	20p13	0.108057	0.0258675	0.0447257	1
ZDHHC23	3q13.31	-0.895382	2.16e-19	1.33e-17	1
ZFAND5	9q21.13	0.63343	5.96e-15	1.45e-13	1
ZFP69	1p34.2	0.296351	0.0112064	0.0212472	1
ZFR	5p13.3	0.166073	0.00348602	0.00752407	1
ZGLP1	19p13.2	-0.474043	0.00722869	0.0143561	1
ZHX2	8q24.13	-0.154468	0.00636097	0.0128179	1
ZMYM5	13q12.11	0.149377	0.0289235	0.0493201	1
ZNF18	17p12	-0.27977	0.00207245	0.00471438	1
ZNF195	11p15.5	-0.314695	9.99e-08	5.4e-07	1
ZNF217	20q13.2	-0.671765	1.2e-07	6.37e-07	1
ZNF229	19q13.2	-0.452982	6.04e-07	2.79e-06	1
ZNF232	17p13.2	0.225174	0.00096426	0.00235481	1
ZNF248	10p11.21	0.239717	0.000115941	0.000343444	1
ZNF283	19q13.31	-0.268922	7.09e-06	2.68e-05	1
ZNF3	7q22.1	-0.34784	8.15e-09	5.43e-08	1
ZNF331	19q13	0.220997	0.01131	0.0214181	1
ZNF333	19p13.12	0.158216	0.00458978	0.00961126	1
ZNF33B	10q11.21	-0.174697	0.00910486	0.0176448	1
ZNF394	7q22.1	0.161476	0.00219774	0.00497177	1
ZNF425	7q36.1	0.353229	1.13e-05	4.14e-05	1
ZNF442	19p13.2	0.498801	7.79e-12	9.71e-11	1
ZNF562	19p13.2	-0.273223	2.09e-06	8.74e-06	1
ZNF578	19q13.41	0.490765	0.00666783	0.0133574	1
ZNF585A	19q13.13	0.216215	4.57e-05	0.000147288	1
ZNF599	19q13.13	-0.262916	0.000256065	0.000706844	1
ZNF600	19q13.42	0.302922	6.57e-05	0.000203914	1
ZNF607	19q13.1	-0.272363	4.57e-06	1.8e-05	1
ZNF610	19q13.41	-0.617992	1.2e-11	1.44e-10	1
ZNF658	9q21.11	0.331626	9.21e-06	3.42e-05	1
ZNF664	12q24.31	-0.450221	6.04e-10	5.05e-09	1
ZNF701	19q13.41	-0.186496	0.00288363	0.00634124	1
ZNF749	19q13.43	-0.354171	0.000202479	0.000571056	1
ZNF766	19q13.41	-0.177885	0.000136858	0.000399813	1
ZNF773	19q13.43	-0.198286	0.000225035	0.00062966	1
ZNF79	9q33.3	0.109025	0.0174965	0.0316724	1
ZNF813	19q13.42	-0.466308	0.000196493	0.000555706	1
ZNF830	17q12	-0.145875	0.00230304	0.0051807	1
ZNF835	19q13.43	0.700016	0.000543756	0.00140282	1
ZNF862	7q36.1	-0.327105	0.00117084	0.00281086	1
ZNF91	19p12	-0.248564	0.000277383	0.000758964	1
ZP1	11q12.2	-1.47242	1.62e-07	8.38e-07	1
ZRANB3	2q21.3	-0.233556	0.000992351	0.00241604	1
ZSCAN16	6p22.1	-0.532134	1.99e-11	2.26e-10	1
ZSCAN20	1p35.1	0.821731	5.06e-06	1.97e-05	1

## Sheet: Aggressive_1845
Supplementary Table S2A – A comprehensive list of 1845 significantly differentially expressed somatic mutated genes in aggressive PCa matched with controls.
Genes	Cytoband	Aggressive_logFC	Aggressive_p-value	Aggressive_FDR	Somatic_aggressive
CSMD3	8q23.3	0.569151	0.0164404	0.0264251	8
FREM2	13q13.3	1.2447	1.11e-06	3.57e-06	8
AHNAK	11q12.3	0.347212	0.000940872	0.00191036	7
PLCB4	20p12.3-p12.2	-0.566924	2.82e-07	9.8e-07	7
FLG	1q21.3	0.650709	0.01422	0.0231449	6
MACF1	1p34.3	0.21339	0.00608584	0.0106369	6
VPS13D	1p36.22-p36.21	0.193057	0.00365503	0.00668601	6
PTPRD	9p24.1-p23	0.503899	0.0221696	0.0347337	6
RYR2	1q43	0.714344	0.00643456	0.0112001	5
CTNNB1	3p22.1	0.136685	0.0141625	0.0230676	5
MT-ND5	mitochondria	0.378383	0.0224641	0.0351446	5
EPHB1	3q22.2	2.44159	1.11e-25	7.07e-24	5
KIAA1614	1q25.3	1.22262	2.98e-18	4.97e-17	5
SACS	13q12.12	0.482643	0.000206713	0.000468723	5
FZD4	11q14.2	-0.301703	0.0116718	0.0193406	5
CSMD1	8p23.2	0.693133	0.0303843	0.0463205	4
COL11A1	1p21.1	-1.19026	0.000414995	0.000893403	4
ZFHX3	16q22.2-q22.3	0.302179	0.00113381	0.00227293	4
EPHA3	3p11.1	0.655246	0.000699744	0.00145213	4
TACC2	10q26.13	0.168797	0.0147685	0.0239425	4
MYCBP2	13q22.3	0.449555	1.47e-05	3.99e-05	4
SETD5	3p25.3	-0.151586	0.0189498	0.0300989	4
TNS1	2q35	1.66857	2.1e-20	5e-19	4
LRP4	11p11.2	1.23475	1.78e-16	2.23e-15	4
TBC1D2	9q22.33	0.837822	1.34e-15	1.48e-14	4
KLHL2	4q32.3	0.508729	8.02e-11	4.6e-10	4
RAG1	11p12	1.00568	1.47e-08	6.11e-08	4
CACNA1C	12p13.33	0.808227	2.12e-08	8.62e-08	4
PCDHGA9	5q31	1.00982	1.71e-07	6.14e-07	4
TRIM28	19q13.4	-0.262266	3.62e-06	1.08e-05	4
EPB41L5	2q14.2	-0.351615	5.89e-06	1.7e-05	4
PCDHA1	5q31.3	-1.79382	6.52e-06	1.86e-05	4
DEPDC1	1p31.3	-1.00019	1.25e-05	3.44e-05	4
SMAD4	18q21.2	0.23937	7.68e-05	0.000185965	4
NPAT	11q22.3	0.260443	0.00120456	0.00240417	4
FAM214A	15q21.2-q21.3	-0.197382	0.00906581	0.0153397	4
NCOR1	17p12-p11.2	0.19064	0.00888008	0.0150559	3
LILRB5	19q13.4	-0.566745	0.00330508	0.0060967	3
ATF7IP	12p13.1	0.277684	0.000668707	0.00139211	3
TRPM6	9q21.13	0.625132	0.000859508	0.00175677	3
MAP2	2q34	-0.498137	0.0112307	0.0186619	3
ARID1B	6q25.3	0.135013	0.0215299	0.0337863	3
ADAMTS13	9q34.2	-0.530795	9.32e-06	2.61e-05	3
PDPR	16q22.1	0.281928	0.00210973	0.00403425	3
PTH2R	2q34	0.820509	0.00227723	0.00432717	3
GPR158	10p12.1	-0.82283	0.00990597	0.016636	3
ACAN	15q26.1	-0.657628	0.0105999	0.0176837	3
ROCK1	18q11.1	0.194941	0.0253156	0.0392624	3
BCORL1	Xq26.1	0.177321	0.0298847	0.0456245	3
HIPK1	1p13.2	0.15315	0.0302025	0.04607	3
BOD1L1	4p15.33	0.190504	0.0315711	0.0479868	3
NYNRIN	14q12	2.11776	1.52e-29	2.04e-27	3
PAQR8	6p12.2	1.74914	1.64e-27	1.49e-25	3
TGFBR3	1p22.1	1.58687	4.72e-26	3.24e-24	3
CDC20	1p34.2	-1.89803	1.86e-25	1.15e-23	3
ATP2B4	1q32.1	1.6952	1.12e-22	4.07e-21	3
IL6ST	5q11.2	0.854447	7.96e-19	1.45e-17	3
LRGUK	7q33	-1.348	5.46e-17	7.44e-16	3
WIF1	12q14.3	2.88914	3.41e-16	4.12e-15	3
EPB41L3	18p11.31	1.28265	1.76e-15	1.92e-14	3
NOS1	12q24.22	2.1496	2.59e-13	2.09e-12	3
HCFC2	12q23.3	0.489515	6.45e-13	4.93e-12	3
MYL6	12q13.2	0.611663	1.81e-12	1.3e-11	3
HIST1H2BG	6p22.2	-1.47097	8.56e-11	4.88e-10	3
FAM196A	10q26.2	1.26353	3.1e-10	1.63e-09	3
ATP11B	3q26.33	-0.631457	4.14e-10	2.14e-09	3
SKIV2L2		0.394876	6.44e-10	3.25e-09	3
MIA3	1q41	-0.642977	3.58e-09	1.63e-08	3
RUNX1T1	8q21.3	0.871594	8.48e-09	3.67e-08	3
TIGD3	11q13.1	-0.733351	2.04e-08	8.32e-08	3
ERBB4	2q34	1.24765	2.33e-08	9.42e-08	3
MME	3q25.2	1.50975	4.79e-08	1.86e-07	3
SRSF2	17q25.2	-0.262826	4.86e-08	1.89e-07	3
RNF215	22q12.2	-0.395227	7.9e-08	2.97e-07	3
TMEM5		-0.32258	8.28e-08	3.11e-07	3
ST3GAL1	8q24.22	0.750663	1.71e-07	6.13e-07	3
TRIOBP	22q13.1	0.316729	3.09e-07	1.07e-06	3
IL4R	16p12.1	0.453321	1e-06	3.23e-06	3
CUL2	10p11.21	0.21375	2.44e-06	7.44e-06	3
MYO9A	15q23	0.334033	2.78e-06	8.41e-06	3
SSRP1	11q12.1	-0.201732	3.26e-06	9.77e-06	3
NAV3	12q21.2	0.815006	3.8e-06	1.13e-05	3
ARHGEF39	9p13.3	-0.521656	4.68e-06	1.37e-05	3
ANKRD28	3p25.1	-0.25897	6.95e-06	1.98e-05	3
ACTG1	17q25.3	-0.293581	1.58e-05	4.27e-05	3
CMIP	16q23.2-q23.3	0.331966	5.84e-05	0.000144143	3
PTCHD4	6p12.3	0.912732	6.3e-05	0.000154806	3
HDAC3	5q31.3	-0.17538	6.79e-05	0.00016605	3
ZNF230	19q13.31	0.189177	8.05e-05	0.000194449	3
PPFIA3	19q13.33	-0.425933	0.000353213	0.000769476	3
PKD1	16p13.3	0.321317	0.000373174	0.00080961	3
BAZ2B	2q24.2	0.251071	0.000799151	0.00164105	3
EFCAB7	1p31.3	0.188249	0.00233499	0.0044296	3
ZNF827	4q31.21-q31.22	0.339869	0.00239241	0.00452409	3
C1S	12p13.31	0.505008	0.00246687	0.00465344	3
DIRC2	3q21.1	-0.233799	0.00273309	0.00511687	3
ZAP70	2q11.2	-0.545732	0.00345409	0.00634932	3
OTUD4	4q31.21	0.222497	0.00403402	0.00730389	3
ZFC3H1	12q21.1	-0.19971	0.00439689	0.00791038	3
FRAS1	4q21.21	-0.464523	0.0053623	0.00948517	3
TRIP12	2q36.3	0.162017	0.00697173	0.0120408	3
USP31	16p12.2	0.218963	0.00801583	0.0137002	3
CGNL1	15q21.3	0.256314	0.00889494	0.0150755	3
GTF2E2	8p12	0.185519	0.00945011	0.0159256	3
KMT2A	11q23.3	0.189285	0.0121571	0.0200707	3
GAB2	11q14.1	0.273956	0.0125915	0.0207101	3
GMIP	19p13.11	-0.178694	0.016079	0.0259029	3
FAM208B	10p15.1	-0.204573	0.0174995	0.0279665	3
RBL2	16q12.2	0.233888	0.0187963	0.0298706	3
RPRD2	1q21.2	0.149731	0.0248877	0.0386541	3
UBR3	2q31.1	0.170606	0.0263573	0.0407648	3
ZNF518A	10q24.1	-0.175622	0.0267404	0.0412775	3
KIF13A	6p22.3	0.159737	0.0272589	0.041976	3
HDAC6	Xp11.23	-0.106368	0.0302312	0.04611	3
AVPR1A	12q14.2	0.868314	4.15e-06	1.22e-05	2
VWA8	13q14.11	0.358433	2.23e-05	5.87e-05	2
CROCCP2	1p36.13	-0.325616	0.000940364	0.00190953	2
KAT6B	10q22.2	0.281344	0.00123026	0.00245122	2
PHF3	6q12	0.195482	0.00295031	0.00548898	2
CD163	12p13.31	-0.53012	0.0039412	0.0071541	2
DNAH17	17q25.3	-0.286292	0.00770919	0.0132104	2
CDKN1B	12p13.1	0.153387	0.0205762	0.0324433	2
GSDMB	17q21.1	-0.745147	5.46e-06	1.58e-05	2
HHIP	4q31.21	1.08455	1.73e-05	4.65e-05	2
DNMT1	19p13.2	-0.259288	8.87e-05	0.00021283	2
DUS3L	19p13.3	-0.28566	0.000176111	0.000404005	2
CTNNAL1	9q31.3	-0.297281	0.000290516	0.000641846	2
ABCC5	3q27.1	-0.360699	0.00039403	0.000852051	2
COL11A2	6p21.32	-0.592049	0.000516243	0.00109525	2
BRD1	22q13.33	-0.158732	0.000601511	0.00126206	2
LIG1	19q13.33	-0.227248	0.00118538	0.00237025	2
FNDC1	6q25.3	-0.766949	0.00348379	0.00640072	2
KL	13q13.1	0.878962	0.00400177	0.00725191	2
PARP1	1q42.12	-0.174994	0.00426699	0.00769093	2
VPS13A	9q21.2	-0.237414	0.00558565	0.00984716	2
STAU2	8q21.11	-0.206022	0.00581623	0.0102106	2
PTPRG	3p14.2	0.280542	0.00648945	0.0112893	2
SETX	9q34.13	0.178211	0.00716885	0.0123442	2
SRRD	22q12.1	0.109016	0.0116851	0.0193558	2
SEZ6L	22q12.1	0.751936	0.011852	0.0196129	2
CDH6	5p13.3	0.396105	0.0154307	0.0249414	2
GRIP2	3p25.1	0.455663	0.0184994	0.0294343	2
CD1C	1q23.1	0.478073	0.019946	0.0315518	2
CNOT4	7q33	0.10755	0.0249457	0.0387279	2
BICD1	12p11.21	-1.70775	2.56e-27	2.22e-25	2
TRGC1	7p14.1	-2.5704	1.66e-26	1.24e-24	2
SCN5A	3p22.2	2.00387	2.94e-25	1.76e-23	2
PTGS1	9q33.2	2.17951	1.13e-24	6.07e-23	2
TARBP1	1q42.2	-1.07566	1.69e-24	8.7e-23	2
TRIM9	14q22.1	2.02303	3.13e-24	1.55e-22	2
GUCY2C	12p12.3	1.94678	4.04e-23	1.59e-21	2
KANK1	9p24.3	0.993264	3.68e-22	1.23e-20	2
CCDC178	18q12.1	2.1564	5.38e-22	1.74e-20	2
ZNF516	18q23	1.61887	9.61e-22	2.96e-20	2
CACNA1D	3p21.1	-2.23674	1.45e-21	4.3e-20	2
CPAMD8	19p13.11	1.74402	1.61e-21	4.74e-20	2
ACACB	12q24.11	1.19247	5.52e-21	1.47e-19	2
KLHL4	Xq21.31	2.12906	6.46e-21	1.7e-19	2
SMOC1	14q24.1	2.53801	6.74e-21	1.76e-19	2
GSTM2	1p13.3	1.83509	1.49e-20	3.69e-19	2
B4GALNT4	11p15.5	-1.77835	2.1e-20	5e-19	2
MMP26	11p15.4	-3.06364	2.49e-20	5.82e-19	2
COMP	19p13.11	-3.10693	3.33e-20	7.6e-19	2
ADRA1A	8p21.2	2.47232	3.59e-20	8.09e-19	2
TGFB1I1	16p11.2	1.59311	1.95e-19	3.93e-18	2
ADRA1D	20p13	2.60861	3.02e-19	5.91e-18	2
SIX1	14q23.1	-1.42928	1.44e-18	2.53e-17	2
JPH2	20q13.12	1.9185	1.81e-18	3.12e-17	2
STK36	2q35	-0.65851	1.9e-18	3.27e-17	2
TLN1	9p13.3	0.749241	9.63e-18	1.49e-16	2
GLI3	7p14.1	1.19723	1.29e-17	1.96e-16	2
PEG3	19q13.4	1.12235	1.98e-17	2.9e-16	2
POLQ	3q13.33	-1.49469	9.53e-17	1.25e-15	2
BYSL	6p21.1	-0.588751	9.79e-17	1.28e-15	2
EZH1	17q21.2	0.483616	2.11e-16	2.63e-15	2
ACACA	17q12	-0.857458	3.65e-16	4.39e-15	2
TRPC4	13q13.3	1.45381	1.96e-15	2.12e-14	2
NRXN3	14q24.3-q31.1	1.46073	4.83e-15	4.95e-14	2
CKAP2L	2q14.1	-1.52452	8.42e-15	8.32e-14	2
LARP1	5q33.2	-0.452168	1.41e-14	1.35e-13	2
C16orf89	16p13.3	1.73117	2.29e-14	2.14e-13	2
COL21A1	6p12.1	1.32059	2.6e-14	2.42e-13	2
ACE	17q23.3	1.08375	2.95e-14	2.72e-13	2
DOPEY2	21q22.12	-0.78338	3.29e-14	3.02e-13	2
ZNF146	19q13.1	-0.49462	3.36e-14	3.08e-13	2
ZNF750	17q25.3	2.06943	5.65e-14	5e-13	2
TSPAN7	Xp11.4	1.11833	6.94e-14	6.09e-13	2
WFS1	4p16.1	0.685553	1.12e-13	9.59e-13	2
ELF4	Xq26.1	1.09072	2.08e-13	1.7e-12	2
SV2A	1q21.2	1.11162	2.62e-13	2.11e-12	2
INPP5D	2q37.1	1.11943	4.95e-13	3.86e-12	2
AGPS	2q31.2	0.84698	4.95e-13	3.86e-12	2
DNMT3A	2p23.3	-0.532369	5.19e-13	4.03e-12	2
VARS2	6p21.33	-0.50654	9.87e-13	7.37e-12	2
TELO2	16p13.3	-0.626658	1.04e-12	7.72e-12	2
PLD1	3q26.31	1.00794	1.31e-12	9.62e-12	2
WSCD2	12q23.3	1.698	1.6e-12	1.16e-11	2
CCDC81	11q14.2	0.8578	1.64e-12	1.19e-11	2
PLEKHA6	1q32.1	0.716565	7.1e-12	4.69e-11	2
SRSF1	17q22	-0.285128	7.61e-12	5.01e-11	2
JAK1	1p31.3	0.516055	8.42e-12	5.5e-11	2
MAST2	1p34.1	-0.564913	8.54e-12	5.58e-11	2
DDIT4	10q22.1	1.06136	8.64e-12	5.64e-11	2
TXNIP	1q21.1	0.727515	8.64e-12	5.64e-11	2
NEFM	8p21.2	2.30484	1.19e-11	7.62e-11	2
MMP9	20q13.12	-1.7973	3.09e-11	1.87e-10	2
NPHP4	1p36.31	-0.463899	5.44e-11	3.18e-10	2
FMN2	1q43	1.39586	5.82e-11	3.39e-10	2
PRDM16	1p36.32	1.1657	5.98e-11	3.48e-10	2
MTMR7	8p22	0.655851	7.96e-11	4.57e-10	2
SLIT3	5q34-q35.1	1.14094	8e-11	4.59e-10	2
PEX6	6p21.1	-0.537384	8.67e-11	4.94e-10	2
RHBDD1	2q36.3	0.300451	9.05e-11	5.13e-10	2
CS	12q13.3	-0.320688	1.91e-10	1.03e-09	2
CACNB4	2q23.3	1.08589	3.7e-10	1.93e-09	2
HECW1	7p14.1-p13	1.68573	4.39e-10	2.27e-09	2
THSD4	15q23	1.05221	7.43e-10	3.71e-09	2
PCDH10	4q28.3	1.29401	8.44e-10	4.18e-09	2
ECE2	3q27.1	-0.667979	8.62e-10	4.26e-09	2
NDST2	10q22.2	-0.346314	9e-10	4.44e-09	2
ABCC9	12p12.1	1.09225	9.48e-10	4.66e-09	2
UHRF1BP1	6p21.31	-0.471559	1.03e-09	5.03e-09	2
MUC15	11p14.3	2.0471	1.03e-09	5.06e-09	2
TRIM62	1p35.1	-0.426787	1.09e-09	5.33e-09	2
KIF26B	1q44	1.09523	1.42e-09	6.84e-09	2
ACTA1	1q42.13	2.51028	1.73e-09	8.2e-09	2
PPFIBP1	12p11.23-p11.22	0.51682	1.84e-09	8.69e-09	2
SUGP2	19p13	-0.383026	1.92e-09	9.07e-09	2
FCGBP	19q13.2	1.49229	2.55e-09	1.19e-08	2
TRIM31	6p22.1	1.39915	3.12e-09	1.43e-08	2
FAS	10q23.31	0.756623	3.13e-09	1.43e-08	2
SETBP1	18q12.3	0.685002	3.24e-09	1.48e-08	2
BNC1	15q25.2	1.75264	3.74e-09	1.7e-08	2
ANKRD52	12q13.3	-0.440435	4.84e-09	2.16e-08	2
MYSM1	1p32.1	-0.561761	5.07e-09	2.25e-08	2
FAM71F2	7q32.1	-0.8648	1.25e-08	5.28e-08	2
TMEM71	8q24.22	0.900923	1.52e-08	6.29e-08	2
TTBK2	15q15.2	0.454236	1.68e-08	6.95e-08	2
DSCC1	8q24.12	-0.649803	2.02e-08	8.25e-08	2
NBEAL2	3p21.31	-0.553125	2.04e-08	8.32e-08	2
ALOX15	17p13.2	-2.40788	2.2e-08	8.93e-08	2
HOOK2	19p13.13	-0.50488	2.72e-08	1.09e-07	2
DCLRE1C	10p13	0.369332	3.28e-08	1.3e-07	2
FAM98C	19q13.2	-0.372595	3.66e-08	1.44e-07	2
COL6A1	21q22.3	0.803387	4.38e-08	1.71e-07	2
AKAP6	14q12	0.818345	4.52e-08	1.76e-07	2
CEP85L	6q22.31	0.533124	4.7e-08	1.83e-07	2
ANKS3	16p13.3	-0.492976	5.06e-08	1.96e-07	2
PEX2	8q21.13	0.354217	5.8e-08	2.23e-07	2
PFKP	10p15.2	0.521033	6.64e-08	2.53e-07	2
ISM2	14q24.3	1.37191	6.96e-08	2.64e-07	2
TAF15	17q12	-0.244637	8.89e-08	3.32e-07	2
SNX4	3q21.2	-0.365866	1.64e-07	5.9e-07	2
BCOR	Xp11.4	-0.513599	2.64e-07	9.23e-07	2
GLI2	2q14.2	0.835604	2.73e-07	9.54e-07	2
URB2	1q42.13	-0.39808	4.3e-07	1.46e-06	2
CNTN2	1q32.1	1.13977	4.32e-07	1.47e-06	2
SHANK2	11q13.3-q13.4	-0.511593	4.65e-07	1.57e-06	2
GRHL3	1p36.11	0.941164	6.48e-07	2.15e-06	2
TRAF2	9q34.3	-0.331799	9.37e-07	3.03e-06	2
CCT6P3	7q11.21	-0.455801	9.9e-07	3.2e-06	2
IPO8	12p11.21	0.244026	1.17e-06	3.73e-06	2
CAMTA1	1p36.31-p36.23	0.271064	1.29e-06	4.08e-06	2
ARSE	Xp22.33	0.868162	1.36e-06	4.31e-06	2
SEMA3E	7q21.11	1.04433	1.77e-06	5.51e-06	2
TOP3A	17p11.2	-0.244877	2.2e-06	6.75e-06	2
CLK2	1q22	-0.318693	2.65e-06	8.06e-06	2
VHL	3p25.3	-0.356965	2.75e-06	8.34e-06	2
ZBTB32	19q13.12	-0.702336	3.15e-06	9.47e-06	2
GRIN3A	9q31.1	-1.62743	3.45e-06	1.03e-05	2
KIF5A	12q13.3	0.910808	4.09e-06	1.21e-05	2
TMEM176A	7q36.1	0.789808	4.17e-06	1.23e-05	2
MTG2	20q13.33	-0.229641	5.09e-06	1.48e-05	2
ALS2CL	3p21.31	0.759622	6.63e-06	1.89e-05	2
LONRF1	8p23.1	0.420294	7.54e-06	2.14e-05	2
KCTD10	12q24.11	0.31763	9.52e-06	2.66e-05	2
KCNH8	3p24.3	-1.37342	1.11e-05	3.08e-05	2
TARS2	1q21.2	-0.219312	1.19e-05	3.29e-05	2
SMPD2	6q21	-0.423641	1.28e-05	3.51e-05	2
NUP188	9q34.11	-0.212451	1.29e-05	3.55e-05	2
DACT1	14q23.1	0.683775	1.56e-05	4.23e-05	2
ATP13A3	3q29	-0.354525	1.66e-05	4.47e-05	2
PDP1	8q22.1	-0.411798	1.69e-05	4.54e-05	2
SNCAIP	5q23.2	0.815431	1.8e-05	4.82e-05	2
OSBPL3	7p15.3	0.649496	1.88e-05	5.02e-05	2
IRS1	2q36.3	0.643961	2.07e-05	5.49e-05	2
TJP2	9q21.11	0.322565	2.14e-05	5.65e-05	2
MAOA	Xp11.3	-0.576098	2.64e-05	6.9e-05	2
ZNF281	1q32.1	-0.316335	2.96e-05	7.66e-05	2
BBS9	7p14.3	0.21293	3.24e-05	8.34e-05	2
ARSB	5q14.1	0.356412	4.15e-05	0.000104731	2
SNX31	8q22.3	1.06955	4.16e-05	0.000104963	2
PASK	2q37.3	-0.473501	4.36e-05	0.000109863	2
PAQR4	16p13.3	-0.520466	4.59e-05	0.000115268	2
SOX6	11p15.3	0.603638	6.38e-05	0.000156504	2
LCN2	9q34.11	1.55077	6.48e-05	0.000158711	2
CD83	6p23	0.44746	7.48e-05	0.000181525	2
ZBTB34	9q33.3	-0.313352	8.22e-05	0.000198324	2
PAK6	15q15.1	0.807418	9.37e-05	0.000223934	2
TTLL11	9q33.2	0.226356	0.000108894	0.000257731	2
CLASRP	19q13.32	-0.342959	0.000118369	0.000278797	2
ERCC2	19q13.32	-0.245716	0.000119287	0.000280779	2
SLC44A5	1p31.1	-1.42505	0.00012421	0.000291289	2
SHKBP1	19q13.2	0.271152	0.000129064	0.000301712	2
THTPA	14q11.2	-0.277254	0.000184459	0.000421687	2
VAV1	19p13.3	0.575935	0.000205073	0.000465238	2
USP12	13q12.13	0.219724	0.00020725	0.000469824	2
MDM4	1q32.1	-0.261284	0.000207766	0.000470878	2
PIK3CD	1p36.22	0.521188	0.000209555	0.000474408	2
NUDT12	5q21.2	0.440646	0.00021588	0.000488068	2
LAMA3	18q11.2	0.68006	0.000221159	0.000498657	2
SUPT5H	19q13.2	-0.159724	0.000232983	0.000522631	2
MIIP	1p36.22	-0.338769	0.000308989	0.000679642	2
LTBR	12p13	-0.239492	0.000313865	0.000689792	2
MKS1	17q22	-0.166158	0.00033784	0.000738694	2
HP1BP3	1p36.12	0.165245	0.000358019	0.000779302	2
DHX38	16q22.2	0.215272	0.000398357	0.000860803	2
ALKBH1	14q24.3	0.162177	0.000401184	0.000866404	2
JUP	17q21.2	-0.233147	0.000459113	0.000980363	2
GCC1	7q32.1	-0.177709	0.000667949	0.00139084	2
CDH24	14q11.2	-0.305105	0.00067211	0.00139824	2
ROBO4	11q24.2	0.437305	0.000747137	0.00154266	2
MOSPD3	7q22.1	-0.253097	0.00082206	0.00168527	2
TBX3	12q24.21	0.361353	0.000986672	0.00199587	2
SLITRK4	Xq27.3	0.996006	0.00100125	0.00202404	2
CCT4	2p15	-0.19586	0.00116285	0.00232721	2
CILP	15q22.31	0.580441	0.00120869	0.00241189	2
ANKH	5p15.2	-0.381667	0.00125026	0.00248837	2
IFIT2	10q23.31	0.527492	0.00125898	0.0025049	2
ADAMTS10	19p13.2	0.458397	0.00126487	0.00251474	2
EXOC4	7q33	0.150809	0.00137034	0.00270747	2
ADCY2	5p15.31	0.571568	0.00149449	0.00293733	2
ZRANB1	10q26.13	0.287298	0.00150391	0.00295428	2
MS4A14	11q12.2	-0.562008	0.00154444	0.00302713	2
GLDC	9p24.1	-1.14168	0.00216949	0.00413695	2
ITGA10	1q21.1	-0.412099	0.00220555	0.00420219	2
DZIP1L	3q22.3	0.401769	0.00237117	0.00449222	2
GOLGB1	3q13.33	-0.175841	0.00288639	0.00537875	2
CENPP	9q22.31	-0.250428	0.00297555	0.00552951	2
AKAP8L	19p13.12	-0.195944	0.00312892	0.00579495	2
SI	3q26.1	-1.17692	0.00316757	0.00586122	2
SLC30A9	4p13	-0.173037	0.00332418	0.00612782	2
ZNF638	2p13.3-p13.2	-0.121956	0.00367026	0.00670987	2
ZNF799	19p13.2	-0.204255	0.00373552	0.00681364	2
KIAA1211	4q12	0.619578	0.00382609	0.00696436	2
SLC4A10	2q24.2	-0.779311	0.00387807	0.00704853	2
TFAP2E	1p34.3	-0.378536	0.00392435	0.00712562	2
UHRF1BP1L	12q23.1	0.214674	0.00407474	0.00737108	2
ATF2	2q31.1	0.179005	0.00446735	0.00803008	2
C19orf57	19p13.12	0.310353	0.00465695	0.00833591	2
USP45	6q16.2	-0.225569	0.00471437	0.00843051	2
PHIP	6q14.1	0.224215	0.00480206	0.00857297	2
FANCB	Xp22.2	-0.34603	0.00482293	0.00860294	2
TRIM33	1p13.2	-0.200185	0.00488612	0.00870302	2
PSD	10q24.32	0.299289	0.00507186	0.0090086	2
PKDREJ	22q13.31	0.374307	0.00564748	0.00994475	2
CASC1	12p12.1	0.346207	0.00602273	0.0105411	2
PRPF40B	12q13.12	0.213711	0.00605858	0.0105958	2
HSP90AA1	14q32.31	0.205712	0.0063904	0.0111307	2
CDK13	7p14.1	-0.147193	0.00649175	0.0112922	2
PDS5B	13q13.1	0.242306	0.00653582	0.0113603	2
MFHAS1	8p23.1	-0.262025	0.00659226	0.0114444	2
G3BP2	4q21.1	-0.200666	0.00664919	0.0115324	2
TTC17	11p12-p11.2	-0.144476	0.00705868	0.0121715	2
ZNF366	5q13.1	0.558357	0.00721332	0.012415	2
ZBTB44	11q24.3	-0.174571	0.00746046	0.012814	2
FARP2	2q37.3	-0.200118	0.00777605	0.0133163	2
PIK3CB	3q22.3	-0.212777	0.00802923	0.0137193	2
LDLR	19p13.2	0.395111	0.00847702	0.0144269	2
CYC1	8q24.3	-0.216595	0.00879267	0.0149165	2
SAMD9	7q21.2	0.433947	0.00905541	0.0153249	2
SUCO	1q24.3	0.203804	0.00914058	0.0154506	2
ATP5A1		0.166352	0.00918459	0.0155179	2
DOCK11	Xq24	0.348774	0.00919992	0.0155381	2
FAM83F	22q13.1	0.395744	0.00934856	0.0157675	2
CPD	17q11.2	-0.224536	0.00937755	0.015812	2
ATP6V1A	3q13.31	-0.180614	0.00985372	0.016559	2
TENM1	Xq25	-0.822321	0.01014	0.0169903	2
PRKD2	19q13.2	-0.148288	0.0102528	0.0171576	2
KIAA1551	12p11.21	0.218391	0.0115563	0.0191631	2
CA2	8q21.2	0.631599	0.0121616	0.0200729	2
VPS35	16q11.2	0.136446	0.0125019	0.020583	2
MCTP2	15q26.2	-0.325598	0.0125458	0.0206478	2
NR1D2	3p24.2	0.225992	0.0134037	0.0219305	2
CD63	12q13.2	0.176816	0.0135448	0.0221436	2
GMPPB	3p21.31	-0.223454	0.0135904	0.0222123	2
ESYT2	7q36.3	0.14097	0.0138187	0.0225574	2
GAPVD1	9q33.3	0.121841	0.013934	0.0227275	2
KLHL20	1q25.1	0.23432	0.0159062	0.0256358	2
SP1	12q13.13	0.134995	0.0162015	0.0260798	2
TTLL3	3p25.3	-0.321065	0.0165713	0.0266193	2
SELP	1q24.2	0.365816	0.0179481	0.0286015	2
PI4KA	22q11.21	-0.149064	0.0197048	0.0311985	2
BRWD3	Xq21.1	-0.180143	0.0200349	0.0316694	2
IFT81	12q24.11	0.146715	0.0200651	0.0317117	2
USP34	2p15	0.31728	0.0209469	0.0329653	2
FRMPD2	10q11.22	-0.416934	0.0235196	0.0366715	2
ENO1	1p36.23	-0.178972	0.0235525	0.0367196	2
SDHC	1q23.3	0.101006	0.0256427	0.0397229	2
KDM4C	9p24.1	-0.105806	0.0265986	0.0410897	2
TDRKH	1q21.3	-0.207422	0.0268063	0.0413654	2
PGBD1	6p22.1	0.130329	0.0272509	0.0419672	2
NUP205	7q33	-0.147704	0.0280894	0.0431432	2
RHOBTB3	5q15	0.22992	0.0284922	0.0437035	2
PCDHGA2	5q31.3	-0.475703	0.0320627	0.0486778	2
ZNF292	6q14.3	0.427193	2.8e-05	7.29e-05	1
CSPP1	8q13.1-q13.2	-0.35375	8.13e-06	2.3e-05	1
FAM120B	6q27	0.173748	0.000511058	0.00108512	1
ZNF585B	19q13.13	0.133258	0.00493435	0.00878299	1
NLRC5	16q13	-0.329106	0.0231948	0.0361987	1
ADAMTSL1	9p22.2-p22.1	0.631877	0.0275023	0.0423297	1
DCHS1	11p15.4	0.878284	4.91e-08	1.91e-07	1
CACNA2D1	7q21.11	0.990097	2.53e-07	8.87e-07	1
PCDHGB7	5q31.3	0.755383	3.44e-05	8.81e-05	1
ADAMTS16	5p15.32	-0.781614	0.000169405	0.000389592	1
TBCK	4q24	0.195455	0.00141464	0.00278903	1
PCDHGA6	5q31	-0.467631	0.00146254	0.0028767	1
SGIP1	1p31.3	-0.550499	0.00179649	0.00347712	1
LRRK1	15q26.3	0.332366	0.00267711	0.00502125	1
ANKLE1	19p13.11	-0.38824	0.00433794	0.00781269	1
COL15A1	9q22.33	-0.411093	0.0062818	0.0109529	1
PCDHGA10	5q31.3	0.661524	0.00789594	0.0135091	1
CRYBG3	3q11.2	0.484993	0.00903774	0.0152978	1
SH3TC2	5q32	0.412749	0.0132642	0.0217195	1
ATG2A	11q13.1	-0.12619	0.0136595	0.0223193	1
LIFR	5p13.1	0.320822	0.0174229	0.0278658	1
SVEP1	9q31.3	-0.423186	0.0210628	0.0331267	1
ZNF7	8q24.3	-0.381314	2.6e-09	1.21e-08	1
NTM	11q25	-1.26798	8.6e-08	3.22e-07	1
PAXBP1	21q22.11	-0.309921	4.11e-06	1.21e-05	1
UAP1L1	9q34.3	-0.451638	4.98e-06	1.45e-05	1
PRDM2	1p36.21	0.262862	1.73e-05	4.64e-05	1
DNAH10	12q24.31	-0.588286	4.87e-05	0.000121786	1
SLC22A4	5q31.1	0.638519	4.95e-05	0.000123582	1
TLL1	4q32.3	0.658785	0.000100544	0.000239137	1
MBTPS1	16q23.3-q24.1	0.214071	0.000124387	0.000291591	1
SELE	1q24.2	1.30004	0.000162867	0.000375776	1
TCF12	15q21.3	0.280883	0.000238333	0.000533398	1
PLEKHA8	7p14.3	-0.243968	0.000269956	0.000599295	1
UBR1	15q15.2	0.289031	0.000274668	0.00060917	1
RIC3	11p15.4	0.652181	0.00030712	0.000675694	1
DNHD1	11p15.4	-0.447335	0.000359133	0.000781359	1
NOS3	7q36.1	-0.484528	0.000443903	0.000950969	1
EFHC1	6p12.2	-0.299482	0.000450318	0.000963593	1
SIGLEC9	19q13.3-q13.4	-0.497569	0.000460286	0.000982754	1
SLC25A46	5q22.1	0.217815	0.000476202	0.00101521	1
CROCC	1p36.13	-0.310598	0.000540823	0.00114318	1
DACH2	Xq21.2	1.23932	0.000725178	0.00150119	1
TF	3q22.1	0.887534	0.000729004	0.0015086	1
EPHA7	6q16.1	0.604699	0.000821717	0.00168476	1
DMAP1	1p34.1	-0.226696	0.000832973	0.00170689	1
VGLL3	3p12.1	1.17384	0.00197009	0.00378688	1
MAP1S	19p13.12	-0.199817	0.00199865	0.00383617	1
TNFRSF10B	8p21.3	0.256334	0.00229493	0.00435809	1
NFRKB	11q24.3	-0.170528	0.00255353	0.00480659	1
DLG2	11q14.1	0.447353	0.00269784	0.00505654	1
CHSY3	5q23.3	-0.513679	0.00367997	0.00672497	1
PLK4	4q28.1	-0.307042	0.00403245	0.00730175	1
MNT	17p13.3	-0.157629	0.00433035	0.00780055	1
MYH15	3q13.13	-0.612114	0.00454668	0.00815358	1
KIF5B	10p11.22	0.186158	0.00516587	0.00916057	1
INPP5E	9q34.3	-0.189412	0.0053026	0.00938857	1
PACS2	14q32.33	-0.149151	0.00558752	0.0098495	1
TTC26	7q34	-0.195053	0.00581832	0.0102124	1
DYNC1LI2	16q22.1	0.305238	0.00618172	0.0107927	1
RNF31	14q12	-0.203523	0.00618377	0.0107952	1
CD6	11q12.2	-0.484564	0.00655724	0.0113879	1
INTS6	13q14.3	0.211259	0.00694078	0.0119918	1
IRAK2	3p25.3	0.317202	0.00710787	0.0122495	1
ZNF347	19q13.3	0.138238	0.0073577	0.0126493	1
GPATCH2	1q41	-0.1586	0.0085928	0.0146132	1
BRCA1	17q21.31	-0.260841	0.00895605	0.0151693	1
ZDBF2	2q33.3	0.353613	0.00954028	0.0160614	1
HIVEP2	6q24.2	0.217514	0.00969149	0.0163011	1
FRMPD1	9p13.2	-0.555053	0.0103602	0.0173167	1
LINGO1	15q24.3	-0.54695	0.0108309	0.0180496	1
SCN8A	12q13.13	-0.477174	0.0109271	0.0182015	1
TAF2	8q24.12	-0.238242	0.0130855	0.0214461	1
SUPT6H	17q11.2	0.0981038	0.0158965	0.0256268	1
BLMH	17q11.2	0.153304	0.0174662	0.0279181	1
KLF4	9q31.2	0.344385	0.017726	0.0282867	1
SLC6A15	12q21.31	0.775475	0.0179229	0.0285736	1
ZNF836	19q13.33	0.12583	0.0213668	0.0335594	1
UNC5D	8p12	0.983564	0.0218216	0.034215	1
HAVCR2	5q33.3	-0.295392	0.0239829	0.0373527	1
FRMD5	15q15.3	0.405877	0.0244897	0.0380744	1
THOC5	22q12.2	-0.150304	0.0284533	0.0436547	1
SP110	2q37.1	-0.17634	0.0296649	0.0453287	1
ANKLE2	12q24.33	-0.0816672	0.0310104	0.0471851	1
P4HA3	11q13.4	-0.406486	0.0320883	0.0487086	1
ACAT1	11q22.3	-0.206721	0.0322816	0.048994	1
EPHA10	1p34.3	-2.21788	9.01e-48	3.32e-44	1
CA14	1q21.2	3.14759	1.44e-41	1.66e-38	1
GSTM3	1p13.3	2.22939	5.52e-40	5.35e-37	1
HJURP	2q37.1	-2.8116	3.79e-39	3.49e-36	1
PYCR1	17q25.3	-1.52992	9.08e-38	6.2e-35	1
GCNT4	5q13.3	2.31555	8e-36	4.21e-33	1
GTSE1	22q13.31	-2.29484	1.2e-34	5.15e-32	1
TMEM132A	11q12.2	-1.86865	2.04e-32	5.54e-30	1
BIRC5	17q25.3	-2.37074	3.07e-32	7.84e-30	1
GNAZ	22q11.22-q11.23	1.9315	2.15e-31	4.35e-29	1
CSRP1	1q32.1	1.87572	7.69e-31	1.39e-28	1
ANGPT1	8q23.1	2.51475	1.28e-30	2.19e-28	1
JPH4	14q11.2	2.8739	1.35e-30	2.28e-28	1
STAT5B	17q21.2	0.634552	6.82e-30	1.01e-27	1
TMEM184A	7p22.3	-1.37128	1.08e-29	1.51e-27	1
GNAO1	16q13	2.33028	1.72e-29	2.25e-27	1
TPX2	20q11.21	-2.04847	2.89e-29	3.55e-27	1
PPARGC1A	4p15.2	2.4736	3.85e-29	4.61e-27	1
ABHD6	3p14.3	1.01224	4.09e-29	4.83e-27	1
KIF18B	17q21.31	-2.34654	5.75e-29	6.71e-27	1
HRASLS5	11q12.3	2.77505	5.85e-29	6.78e-27	1
RBP1	3q23	1.98017	8.02e-29	8.96e-27	1
TTYH3	7p22.3	-1.07473	1.25e-28	1.33e-26	1
KCTD14	11q14.1	2.4356	1.46e-28	1.53e-26	1
PLEKHA2	8p11.22	1.39457	1.27e-27	1.17e-25	1
ST6GALNAC4	9q34.11	1.57739	2.22e-27	1.97e-25	1
KLHL14	18q12.1	2.48189	3.45e-27	2.93e-25	1
L3MBTL4	18p11.31	1.98918	4.75e-27	3.94e-25	1
CXCR2	2q35	2.92545	5.99e-27	4.84e-25	1
STOX2	4q35.1	1.83088	1.34e-26	1.02e-24	1
CTNND2	5p15.2	-1.72159	1.44e-26	1.09e-24	1
DUOX1	15q21.1	2.42136	2.06e-26	1.51e-24	1
ZNF154	19q13.43	1.71988	2.36e-26	1.72e-24	1
FERMT2	14q22.1	1.39226	2.98e-26	2.14e-24	1
LGR6	1q32.1	3.11382	2.99e-26	2.14e-24	1
TRIP13	5p15.33	-1.48367	3e-26	2.14e-24	1
ZDHHC9	Xq26.1	-0.873217	4.69e-26	3.23e-24	1
CCDC69	5q33.1	1.61078	4.81e-26	3.3e-24	1
GNAI2	3p21.31	0.750903	7.23e-26	4.77e-24	1
SLC12A7	5p15.33	-0.68396	8.55e-26	5.53e-24	1
C22orf23	22q13.1	1.281	2.13e-25	1.3e-23	1
NRG2	5q31.2	2.31399	4.32e-25	2.5e-23	1
ELP3	8p21.1	0.781197	5.58e-25	3.16e-23	1
RASL12	15q22.31	1.97771	7.48e-25	4.16e-23	1
PDE1C	7p14.3	2.75589	1.13e-24	6.07e-23	1
MCC	5q22.2	1.63054	1.39e-24	7.26e-23	1
CHTF18	16p13.3	-1.22821	3.59e-24	1.75e-22	1
GSTM5	1p13.3	2.11083	3.63e-24	1.76e-22	1
VWCE	11q12.2	1.6852	5.73e-24	2.67e-22	1
MATR3	5q31.2	-1.23397	5.87e-24	2.71e-22	1
SRD5A2	2p23.1	2.66992	6.7e-24	3.02e-22	1
ANKMY2	7p21.1	0.620201	7.47e-24	3.32e-22	1
CCBE1	18q21.32	2.70989	8.24e-24	3.65e-22	1
ZNF485	10q11.21	-0.800792	1.22e-23	5.29e-22	1
SS18L1	20q13.33	-0.610627	1.58e-23	6.72e-22	1
DSTN	20p12.1	0.761781	2.29e-23	9.36e-22	1
SH3PXD2B	5q35.1	1.20729	2.56e-23	1.04e-21	1
CCDC8	19q13.32	1.82811	8.19e-23	3.04e-21	1
SSBP2	5q14.1	0.811362	8.31e-23	3.08e-21	1
B3GNT9	16q22.1	1.38096	1.8e-22	6.32e-21	1
CCDC40	17q25.3	-0.963524	1.81e-22	6.37e-21	1
TOP2A	17q21.2	-1.97187	2.44e-22	8.34e-21	1
RALGAPA2	20p11.23	-1.26922	2.96e-22	9.96e-21	1
TRAF3IP2	6q21	1.09032	3.4e-22	1.13e-20	1
MBNL2	13q32.1	1.24552	3.95e-22	1.31e-20	1
EIF2AK1	7p22.1	-0.627966	4.45e-22	1.47e-20	1
PBX1	1q23.3	0.961079	4.63e-22	1.52e-20	1
PDLIM5	4q22.3	-1.83246	9.72e-22	2.99e-20	1
MSI1	12q24.31	-1.10493	1.01e-21	3.08e-20	1
LRRN3	7q31.1	2.32296	1.91e-21	5.53e-20	1
CHRDL1	Xq23	2.31853	1.97e-21	5.67e-20	1
FASN	17q25.3	-1.60365	2e-21	5.73e-20	1
ICA1L	2q33.2	0.83844	3.43e-21	9.52e-20	1
KCNAB1	3q25.31	1.82228	9.08e-21	2.33e-19	1
CHST2	3q24	1.65587	1.04e-20	2.64e-19	1
BUB1	2q13	-1.68223	1.63e-20	4e-19	1
ANXA2	15q22.2	1.28716	2e-20	4.81e-19	1
OGT	Xq13.1	-0.991059	3.02e-20	6.97e-19	1
ESRP1	8q22.1	-0.838797	3.48e-20	7.89e-19	1
CPEB1	15q25.2	1.58771	3.59e-20	8.09e-19	1
PDK4	7q21.3	2.26926	3.63e-20	8.16e-19	1
EPB41L1	20q11.23	0.670116	3.76e-20	8.43e-19	1
CD40	20q13.12	1.45831	3.79e-20	8.48e-19	1
ZNF846	19p13.2	0.657814	3.8e-20	8.5e-19	1
DNAJB4	1p31.1	1.37424	4.09e-20	9.09e-19	1
NCAM1	11q23.2	2.34151	5.4e-20	1.19e-18	1
ATAD3C	1p36.33	1.69602	6.41e-20	1.39e-18	1
SCARB1	12q24.31	-0.743359	6.82e-20	1.47e-18	1
TMEM246	9q31.1	2.02276	7.01e-20	1.51e-18	1
LRRC17	7q22.1	1.21383	8.29e-20	1.76e-18	1
KCNQ5	6q13	1.86789	8.46e-20	1.8e-18	1
ISX	22q12.3	-2.28824	8.77e-20	1.86e-18	1
PDK2	17q21.33	0.772137	1.23e-19	2.53e-18	1
CCSER2	10q23.1	0.69874	2.07e-19	4.15e-18	1
POU5F1B	8q24.21	-1.38116	2.08e-19	4.16e-18	1
ADAMTS5	21q21.3	1.89511	2.15e-19	4.3e-18	1
LSM11	5q33.3	0.784574	2.85e-19	5.59e-18	1
MAMDC2	9q21.12	1.70309	3.15e-19	6.11e-18	1
CD81	11p15.5	0.714948	3.38e-19	6.54e-18	1
CA12	15q22.2	1.60364	3.4e-19	6.58e-18	1
LPIN1	2p25.1	0.847906	4.48e-19	8.46e-18	1
VIT	2p22.2	2.28173	4.69e-19	8.83e-18	1
MOB3C	1p33	0.677539	4.89e-19	9.2e-18	1
MAGI2	7q21.11	0.916471	4.98e-19	9.36e-18	1
SH3RF1	4q32.3-q33	-1.27909	5.37e-19	1e-17	1
CCDC85A	2p16.1	1.87212	5.43e-19	1.01e-17	1
APOBEC3D	22q13.1	1.60633	5.57e-19	1.03e-17	1
NAGS	17q21.31	1.10733	6.22e-19	1.15e-17	1
PDGFD	11q22.3	1.3236	6.66e-19	1.22e-17	1
KCNJ5	11q24.3	1.71295	1e-18	1.8e-17	1
PRPH2	6p21.1	1.68513	1.42e-18	2.5e-17	1
DCBLD2	3q12.1	0.84153	1.52e-18	2.66e-17	1
FLNA	Xq28	1.71366	1.66e-18	2.88e-17	1
SLC22A17	14q11.2	1.14653	1.84e-18	3.16e-17	1
PRR16	5q23.1	-2.29342	2.74e-18	4.62e-17	1
C11orf70		1.52361	2.93e-18	4.9e-17	1
PGAP1	2q33.1	0.985631	2.97e-18	4.96e-17	1
RNASEL	1q25.3	0.686902	3.01e-18	5.01e-17	1
MDFIC	7q31.1-q31.2	1.10127	3.47e-18	5.77e-17	1
ITGA3	17q21.33	1.04897	4.34e-18	7.09e-17	1
HID1	17q25.1	-0.787705	5.16e-18	8.33e-17	1
PLXNB3	Xq28	-1.10572	6.03e-18	9.66e-17	1
IQCA1	2q37.2-q37.3	1.70397	1.07e-17	1.65e-16	1
SLC27A4	9q34.11	-0.750763	1.18e-17	1.79e-16	1
LPP	3q27.3-q28	0.896098	1.22e-17	1.85e-16	1
PAXIP1	7q36.2	-0.548267	1.46e-17	2.19e-16	1
CKMT2	5q14.1	1.49292	1.53e-17	2.29e-16	1
TUBG2	17q21.2	0.752504	1.77e-17	2.62e-16	1
DDO	6q21	1.46608	1.79e-17	2.64e-16	1
WDR90	16p13.3	-0.790403	2.09e-17	3.06e-16	1
HOXB2	17q21.32	1.47952	2.15e-17	3.13e-16	1
GJB5	1p34.3	2.76243	2.46e-17	3.54e-16	1
ZSCAN22	19q13.43	-0.4503	2.51e-17	3.62e-16	1
EVA1C	21q22.11	1.1213	2.56e-17	3.68e-16	1
NLE1	17q12	-0.64346	2.63e-17	3.78e-16	1
SPON1	11p15.2	1.6972	3.17e-17	4.49e-16	1
PIP5K1C	19p13.3	0.547599	4.25e-17	5.92e-16	1
HNRNPF	10q11.21	-0.517675	4.92e-17	6.77e-16	1
SRPX	Xp11.4	1.57143	5.07e-17	6.94e-16	1
RAC3	17q25.3	-1.17272	5.79e-17	7.88e-16	1
COPZ2	17q21.32	1.25387	6.34e-17	8.58e-16	1
COX7A1	19q13.12	1.60357	7.2e-17	9.65e-16	1
MRVI1	11p15.4	1.54403	8.24e-17	1.1e-15	1
ISCU	12q23.3	0.501962	9.03e-17	1.2e-15	1
ZNF721	4p16.3	-0.49906	1.03e-16	1.34e-15	1
TEAD1	11p15.3	0.949723	1.08e-16	1.41e-15	1
MPHOSPH8	13q12.11	0.375137	1.19e-16	1.55e-15	1
TACC1	8p11.22	1.01944	1.32e-16	1.69e-15	1
ACTRT3	3q26.2	0.862737	2.02e-16	2.54e-15	1
APBA2	15q13.1	-1.28462	2.03e-16	2.54e-15	1
TSPAN2	1p13.2	1.37134	2.04e-16	2.55e-15	1
SNRPA1	15q26.3	-0.510803	2.09e-16	2.61e-15	1
FOXQ1	6p25.3	1.97065	2.25e-16	2.79e-15	1
ADCY6	12q13.12	-0.655916	2.43e-16	2.99e-15	1
SPATA6	1p33	1.21625	2.67e-16	3.28e-15	1
TRIM35	8p21.2	0.661056	2.77e-16	3.39e-15	1
NOL6	9p13.3	-0.501074	2.97e-16	3.62e-15	1
LAMB3	1q32.2	2.4199	3.09e-16	3.76e-15	1
UCK2	1q24.1	-0.827916	3.69e-16	4.45e-15	1
SSX2IP	1p22.3	0.528778	3.74e-16	4.5e-15	1
PCP4	21q22.2	2.02978	4.06e-16	4.85e-15	1
BCAR3	1p22.1	0.861117	4.63e-16	5.5e-15	1
ANXA4	2p13.3	0.554328	4.71e-16	5.58e-15	1
PRKCA	17q24.2	1.22382	4.77e-16	5.64e-15	1
CCNJL	5q33.3	1.45775	5.33e-16	6.28e-15	1
ABCG1	21q22.3	-0.848088	5.81e-16	6.79e-15	1
TYK2	19p13.2	-0.412247	6.94e-16	8.05e-15	1
NBPF8	1p11.2	-1.08142	7.04e-16	8.14e-15	1
RUSC1	1q22	-0.642002	7.85e-16	8.99e-15	1
STARD8	Xq13.1	1.24761	9e-16	1.02e-14	1
SCARA5	8p21.1	2.53191	9e-16	1.02e-14	1
UHRF1	19p13.3	-1.43103	9.02e-16	1.02e-14	1
NLRP12	19q13.42	-2.0971	9.34e-16	1.06e-14	1
C21orf62	21q22.11	2.04626	9.74e-16	1.1e-14	1
FZD7	2q33.1	1.1221	1.02e-15	1.15e-14	1
STK35	20p13	-0.517623	1.1e-15	1.23e-14	1
BEND3	6q21	-1.09224	1.3e-15	1.44e-14	1
AMOT	Xq23	1.28589	1.3e-15	1.45e-14	1
FGF7	15q21.2	1.77716	1.33e-15	1.47e-14	1
KLK2	19q13.33	-1.61277	1.35e-15	1.49e-14	1
LIG3	17q12	-0.636696	1.39e-15	1.53e-14	1
NR3C2	4q31	0.831909	1.45e-15	1.6e-14	1
BTG3	21q21.1	0.876674	1.97e-15	2.14e-14	1
XPO6	16p11.2	-0.73822	2.4e-15	2.56e-14	1
CCDC82	11q21	0.755853	2.72e-15	2.88e-14	1
SLC44A4	6p21.33	-0.866117	2.74e-15	2.89e-14	1
DUS1L	17q25.3	-0.882839	2.77e-15	2.92e-14	1
BLM	15q26.1	-0.952547	2.8e-15	2.94e-14	1
VIPAS39	14q24.3	0.331487	2.94e-15	3.08e-14	1
SPARCL1	4q22.1	1.26249	2.96e-15	3.1e-14	1
CCDC115	2q21.1	0.427478	3.03e-15	3.17e-14	1
STAT5A	17q21.2	0.702992	3.06e-15	3.2e-14	1
SERPINB5	18q21.33	2.4632	3.13e-15	3.27e-14	1
UVSSA	4p16.3	-0.796107	3.3e-15	3.44e-14	1
ZNF804A	2q32.1	1.78661	3.34e-15	3.48e-14	1
CABP4	11q13.2	-1.16227	3.4e-15	3.54e-14	1
GARS	7p14.3	-0.520239	4.22e-15	4.35e-14	1
MOV10L1	22q13.33	-1.88788	4.93e-15	5.05e-14	1
LRRC8B	1p22.2	-0.73902	5.06e-15	5.17e-14	1
DOCK4	7q31.1	-0.910937	6.07e-15	6.15e-14	1
2019-03-01		-0.90605	6.61e-15	6.64e-14	1
FAM181B	11q14.1	1.39647	7.02e-15	7e-14	1
BNC2	9p22.3-p22.2	1.35208	7.36e-15	7.33e-14	1
SKIDA1	10p12.31	1.14445	7.48e-15	7.44e-14	1
CPED1	7q31.31	1.49044	7.79e-15	7.73e-14	1
PEAK1	15q24.3	1.1697	7.93e-15	7.85e-14	1
PTBP1	19p13.3	-0.344386	8.79e-15	8.66e-14	1
FANCD2	3p25.3	-0.658607	9.18e-15	9.03e-14	1
KANK4	1p31.3	1.88133	9.77e-15	9.58e-14	1
GNPNAT1	14q22.1	-0.769919	1.14e-14	1.11e-13	1
CLN5	13q22.3	0.548255	1.18e-14	1.15e-13	1
ANAPC5	12q24.31	-0.455182	1.19e-14	1.16e-13	1
ZDHHC15	Xq13.3	1.4111	1.2e-14	1.16e-13	1
EIF2S3	Xp22.11	-0.439958	1.57e-14	1.49e-13	1
CCT2	12q15	-0.465894	1.57e-14	1.5e-13	1
CCNE2	8q22.1	-0.954872	2.07e-14	1.95e-13	1
CCDC136	7q32.1	1.09365	2.09e-14	1.96e-13	1
PROM1	4p15.32	2.40933	2.09e-14	1.97e-13	1
KRT16	17q21.2	2.54621	2.47e-14	2.31e-13	1
BDNF	11p14.1	1.62227	2.49e-14	2.32e-13	1
TMOD2	15q21.2	0.837148	2.65e-14	2.46e-13	1
ZNF483	9q31.3	0.99502	3.36e-14	3.07e-13	1
CAMK2N2	3q27.1	-1.43128	4.37e-14	3.94e-13	1
RSAD1	17q21.33	-0.406867	4.72e-14	4.23e-13	1
SLC27A3	1q21.3	0.753314	5.31e-14	4.73e-13	1
VILL	3p22.2	1.40778	5.35e-14	4.76e-13	1
NXPE3	3q12.3	0.822792	5.6e-14	4.96e-13	1
ARHGAP39	8q24.3	-0.68857	5.65e-14	5e-13	1
MCM10	10p13	-1.46398	5.87e-14	5.19e-13	1
ABCD3	1p21.3	0.497809	5.95e-14	5.26e-13	1
SMAD3	15q22.33	0.56268	6.6e-14	5.81e-13	1
C2orf40	2q12.2	1.71121	6.79e-14	5.97e-13	1
MMP10	11q22.2	-2.25863	7.4e-14	6.47e-13	1
SYT7	11q12.2	-1.02281	7.76e-14	6.76e-13	1
PI16	6p21.2	2.74857	8.9e-14	7.68e-13	1
NSDHL	Xq28	0.50093	9.4e-14	8.09e-13	1
TMEM143	19q13.32	0.490516	9.81e-14	8.43e-13	1
ACTN4	19q13.2	0.462821	9.86e-14	8.47e-13	1
NME1	17q21.33	-0.778999	1.22e-13	1.04e-12	1
ZNF781	19q13.12	0.917216	1.33e-13	1.12e-12	1
NCCRP1	19q13.2	1.91769	1.35e-13	1.14e-12	1
FOXP2	7q31.1	1.50561	1.59e-13	1.32e-12	1
SOX12	20p13	-0.660616	1.81e-13	1.49e-12	1
OXR1	8q23.1	0.659712	1.86e-13	1.53e-12	1
SLC18A2	10q25.3	2.10376	1.98e-13	1.62e-12	1
KDELC2	11q22.3	0.736161	2.06e-13	1.68e-12	1
EEF2	19p13.3	-0.566674	2.19e-13	1.79e-12	1
CCDC110	4q35.1	-0.962369	2.33e-13	1.9e-12	1
KDSR	18q21.33	0.447285	3.02e-13	2.41e-12	1
ARHGAP11A	15q13.3	-0.942508	3.12e-13	2.49e-12	1
AOC3	17q21.31	1.23882	3.44e-13	2.73e-12	1
FAM217B	20q13.33	0.614723	3.6e-13	2.85e-12	1
PPP3CA	4q24	-0.899306	3.9e-13	3.07e-12	1
ZNF282	7q36.1	-0.359694	4.22e-13	3.32e-12	1
PTRHD1	2p23.3	-0.77603	4.26e-13	3.34e-12	1
SLC19A2	1q24.2	-0.75752	4.63e-13	3.62e-12	1
PHF14	7p21.3	-0.454041	4.83e-13	3.77e-12	1
FOXB2	9q21.2	-3.35849	5.06e-13	3.93e-12	1
B3GAT1	11q25	-1.6784	5.18e-13	4.02e-12	1
GART	21q22.11	-0.419791	5.49e-13	4.24e-12	1
ABCA3	16p13.3	-0.671976	5.61e-13	4.32e-12	1
B4GALNT1	12q13.3	1.21372	5.88e-13	4.53e-12	1
SNX12	Xq13.1	0.26512	5.93e-13	4.56e-12	1
CACNA2D3	3p21.1-p14.3	1.19113	6.34e-13	4.85e-12	1
CD82	11p11.2	0.750127	8.19e-13	6.18e-12	1
ZNF707	8q24.3	-0.531764	9.83e-13	7.35e-12	1
ACLY	17q21.2	-0.706467	1.15e-12	8.5e-12	1
DUSP18	22q12.2	0.616781	1.2e-12	8.87e-12	1
RBMS2	12q13.3	0.622131	1.4e-12	1.02e-11	1
KRT23	17q21.2	2.66071	1.4e-12	1.02e-11	1
TSGA10	2q11.2	-0.732866	1.56e-12	1.13e-11	1
XG	Xp22.33	1.77192	1.56e-12	1.13e-11	1
FCGRT	19q13.33	0.696853	1.61e-12	1.17e-11	1
CHMP3	2p11.2	0.328746	1.68e-12	1.21e-11	1
SLC35F4	14q22.3-q23.1	1.33917	1.73e-12	1.25e-11	1
ATP8A1	4p13	-0.801028	1.76e-12	1.27e-11	1
GLUL	1q25.3	0.623337	1.8e-12	1.29e-11	1
ITPR1	3p26.1	1.28792	1.84e-12	1.32e-11	1
APLF	2p13.3	0.863927	1.94e-12	1.39e-11	1
HSPB1	7q11.23	1.20399	2.11e-12	1.5e-11	1
RRAGA	9p22.1	0.334654	2.22e-12	1.57e-11	1
ACSS2	20q11.22	0.414819	2.26e-12	1.6e-11	1
SPRY3	Xq28 and Yq12	1.10631	2.49e-12	1.76e-11	1
FUT2	19q13.33	1.50464	2.64e-12	1.85e-11	1
NTRK3	15q25.3	1.50409	2.66e-12	1.87e-11	1
NOP58	2q33.1	-0.403106	2.67e-12	1.87e-11	1
GYPC	2q14.3	1.00231	2.97e-12	2.07e-11	1
HYPK	15q15.3	-0.737835	3.18e-12	2.2e-11	1
ATP2C1	3q22.1	-0.660485	3.67e-12	2.52e-11	1
NEK7	1q31.3	0.544765	3.89e-12	2.67e-11	1
FANCF	11p14.3	-0.491915	4.46e-12	3.04e-11	1
RNF144A	2p25.1	-0.731871	4.48e-12	3.05e-11	1
TMEM243	7q21.12	0.672831	4.79e-12	3.25e-11	1
PPP2R5A	1q32.3	0.383962	5.18e-12	3.49e-11	1
UGT2B4	4q13.3	-3.15551	5.92e-12	3.96e-11	1
EXT1	8q24.11	0.486998	5.99e-12	4.01e-11	1
ZMIZ2	7p13	-0.391701	6.1e-12	4.07e-11	1
DDX24	14q32.12	0.331644	6.22e-12	4.14e-11	1
MMP11	22q11.23	-1.25061	6.54e-12	4.35e-11	1
S100A4	1q21.3	1.18614	6.68e-12	4.44e-11	1
IER5	1q25.3	0.984838	6.93e-12	4.59e-11	1
MAST4	5q12.3	0.783871	7.28e-12	4.81e-11	1
MSN	Xq12	0.854493	8.35e-12	5.46e-11	1
WDR75	2q32.2	-0.337435	8.77e-12	5.72e-11	1
HIST1H2AD	6p22.2	-1.39617	9.16e-12	5.97e-11	1
ALCAM	3q13.11	-0.748049	9.22e-12	6e-11	1
FTO	16q12.2	0.495986	9.64e-12	6.25e-11	1
PEX3	6q24.2	0.370936	1.17e-11	7.48e-11	1
CAPZB	1p36.13	0.362908	1.19e-11	7.61e-11	1
BPHL	6p25.2	-0.593583	1.2e-11	7.66e-11	1
HSD11B1	1q32.2	1.3384	1.2e-11	7.66e-11	1
PDCD11	10q24.33	-0.433511	1.26e-11	8e-11	1
PDCD5	19q13.11	-0.492901	1.35e-11	8.57e-11	1
RAP1GAP2	17p13.3	-0.910061	1.69e-11	1.06e-10	1
ZWINT	10q21-q22	-0.935988	1.77e-11	1.11e-10	1
FSCN2	17q25.3	-0.877905	1.97e-11	1.23e-10	1
SV2B	15q26.1	1.80605	1.99e-11	1.24e-10	1
ENAH	1q42.12	0.519099	2.22e-11	1.38e-10	1
CPQ	8q22.1	0.698554	2.44e-11	1.5e-10	1
EFNA5	5q21.3	1.27604	2.58e-11	1.58e-10	1
PIP5KL1	9q34.11	1.04511	2.61e-11	1.6e-10	1
SLC7A4	22q11.21	2.69491	2.66e-11	1.63e-10	1
MED4	13q14.2	0.433948	2.86e-11	1.74e-10	1
ZNF300P1	5q33.1	1.36758	2.89e-11	1.76e-10	1
EBF2	8p21.2	-1.81947	3.01e-11	1.83e-10	1
BAZ1A	14q13.1-q13.2	-0.492168	3.11e-11	1.89e-10	1
CHD5	1p36.31	1.26352	3.12e-11	1.89e-10	1
SRMS	20q13.33	-1.62782	3.2e-11	1.94e-10	1
KIFC3	16q21	0.864196	3.37e-11	2.03e-10	1
CNTN1	12q12	1.40531	3.81e-11	2.27e-10	1
TRIM22	11p15.4	1.04108	3.84e-11	2.29e-10	1
VPS36	13q14.3	0.495686	3.93e-11	2.34e-10	1
SPDL1	5q35.1	-0.516663	4.35e-11	2.58e-10	1
ZMYND11	10p15.3	0.373099	4.6e-11	2.71e-10	1
MAPKAPK5	12q24.12-q24.13	-0.295769	4.66e-11	2.75e-10	1
ECI2	6p25.2	-0.633002	4.69e-11	2.76e-10	1
FMO4	1q24.3	0.725932	4.82e-11	2.84e-10	1
GALNT3	2q24.3	-0.91254	4.96e-11	2.92e-10	1
CYFIP2	5q33.3	-0.598539	4.99e-11	2.93e-10	1
SUSD4	1q41	1.01237	5.66e-11	3.3e-10	1
TIPARP	3q25.31	0.898072	5.91e-11	3.45e-10	1
TECPR2	14q32.33	0.358903	5.94e-11	3.47e-10	1
DNASE2B	1p31.1-p22.3	-1.83597	6.1e-11	3.55e-10	1
TTC7A	2p21	0.438368	6.3e-11	3.66e-10	1
CHFR	12q24.33	-0.35635	6.38e-11	3.7e-10	1
DSC3	18q12.1	1.87043	6.44e-11	3.73e-10	1
NLN	5q12.3	-0.611847	7.08e-11	4.09e-10	1
AOC1	7q36.1	3.10402	7.28e-11	4.2e-10	1
PYCARD	16p11.2	1.02538	7.45e-11	4.29e-10	1
EARS2	16p12.2	-0.391314	7.85e-11	4.51e-10	1
PCDHGB1	5q31	-1.61978	8.35e-11	4.76e-10	1
NUMA1	11q13.4	-0.429263	8.46e-11	4.83e-10	1
MOCOS	18q12.2	0.725512	8.65e-11	4.92e-10	1
PGM1	1p31.3	0.539636	9.91e-11	5.59e-10	1
EDIL3	5q14.3	1.12969	1.03e-10	5.78e-10	1
IVNS1ABP	1q25.3	0.463988	1.08e-10	6.05e-10	1
CDKL2	4q21.1	1.40772	1.12e-10	6.3e-10	1
SLFN12	17q12	1.10281	1.17e-10	6.57e-10	1
DPP3	11q13.2	-0.465796	1.27e-10	7.05e-10	1
AADAT	4q33	-0.943501	1.32e-10	7.32e-10	1
DPP8	15q22.31	0.359949	1.42e-10	7.86e-10	1
MLST8	16p13.3	-0.492344	1.43e-10	7.9e-10	1
SMYD2	1q32.3	-0.628663	1.62e-10	8.85e-10	1
CASP1	11q22.3	0.956801	1.64e-10	8.95e-10	1
SHC2	19p13.3	-0.850721	1.72e-10	9.35e-10	1
ANKRD34B	5q14.1	-3.49733	1.75e-10	9.52e-10	1
MCM3AP	21q22.3	-0.370396	1.84e-10	9.96e-10	1
SLC22A10	11q12.3	-2.07016	1.87e-10	1.01e-09	1
KRT14	17q21.2	2.11452	1.94e-10	1.05e-09	1
POLN	4p16.3	-0.785425	2.02e-10	1.09e-09	1
GPALPP1	13q14.12	0.405989	2.09e-10	1.12e-09	1
ZWILCH	15q22.31	-0.491966	2.14e-10	1.15e-09	1
TSHZ2	20q13.2	0.911604	2.25e-10	1.2e-09	1
BAIAP2L2	22q13.1	-1.61345	2.35e-10	1.26e-09	1
HNRNPL	19q13.2	-0.260701	2.41e-10	1.28e-09	1
TIMM13	19p13.3	-0.602501	2.41e-10	1.29e-09	1
C10orf76		0.273767	2.54e-10	1.35e-09	1
GHRHR	7p14.3	-1.88049	2.65e-10	1.41e-09	1
DYRK1B	19q13.2	-0.461315	2.68e-10	1.42e-09	1
FADS2	11q12.2	1.63399	2.71e-10	1.44e-09	1
SMAD6	15q22.31	0.810572	2.72e-10	1.44e-09	1
ZDHHC11	5p15.33	-1.22899	2.88e-10	1.52e-09	1
GBP2	1p22.2	0.965112	2.89e-10	1.53e-09	1
AKAP7	6q23.2	0.83163	3.34e-10	1.75e-09	1
ADAMTS8	11q24.3	1.01121	3.43e-10	1.8e-09	1
SYNPO	5q33.1	0.888046	3.71e-10	1.94e-09	1
DDX39B	6p21.33	-0.680452	3.87e-10	2.01e-09	1
THBS3	1q22	-0.521872	3.98e-10	2.06e-09	1
LACC1	13q14.11	0.637895	4.29e-10	2.22e-09	1
DGKQ	4p16.3	-0.532	4.33e-10	2.24e-09	1
DNAJC2	7q22.1	-0.355151	4.47e-10	2.31e-09	1
GPR75	2p16.2	0.997465	4.48e-10	2.31e-09	1
LZTS3	20p13	0.707605	4.87e-10	2.5e-09	1
NTRK1	1q23.1	1.19363	4.93e-10	2.53e-09	1
ZNF841	19q13.41	-0.546825	5.43e-10	2.77e-09	1
BMPR1A	10q23.2	0.429302	5.45e-10	2.78e-09	1
MPRIP	17p11.2	0.379274	5.64e-10	2.87e-09	1
ATG12	5q22.3	0.297829	6.5e-10	3.27e-09	1
HIST1H2BF	6p22.2	-1.75661	6.5e-10	3.27e-09	1
POLR1B	2q14.1	-0.428686	7.25e-10	3.63e-09	1
DCN	12q21.33	1.16922	7.38e-10	3.69e-09	1
MAP3K11	11q13.1	-0.376176	7.9e-10	3.93e-09	1
MAP3K9	14q24.2	-0.591495	8e-10	3.98e-09	1
FCER1A	1q23.2	1.26506	8.07e-10	4.01e-09	1
GRIN1	9q34.3	-0.837946	8.51e-10	4.21e-09	1
LYSMD4	15q26.3	0.467037	8.64e-10	4.27e-09	1
PI4K2A	10q24.2	0.347263	8.67e-10	4.29e-09	1
RNF149	2q11.2	-0.298798	9.09e-10	4.48e-09	1
EVL	14q32.2	-0.453505	9.66e-10	4.74e-09	1
ANKRD13B	17q11.2	-0.790429	1.05e-09	5.14e-09	1
TSTA3	8q24.3	-0.670639	1.06e-09	5.19e-09	1
FAM71E1	19q13.33	-0.682599	1.12e-09	5.47e-09	1
PPP2R1B	11q23.1	-0.387197	1.26e-09	6.11e-09	1
ANTXR2	4q21.21	0.813538	1.29e-09	6.24e-09	1
CYB561A3	11q12.2	-0.740659	1.36e-09	6.58e-09	1
SLC5A8	12q23.1-q23.2	2.45979	1.37e-09	6.59e-09	1
CDC6	17q21.2	-0.854212	1.44e-09	6.93e-09	1
ZNF782	9q22.33	-0.480048	1.48e-09	7.09e-09	1
CCNG2	4q21.1	-0.670223	1.5e-09	7.17e-09	1
DOCK1	10q26.2	0.498492	1.52e-09	7.27e-09	1
MACC1	7p21.1	1.33824	1.6e-09	7.63e-09	1
C1orf43	1q21.3	-0.343048	1.83e-09	8.65e-09	1
PABPC4	1p34.3	-0.421947	1.85e-09	8.76e-09	1
YEATS2	3q27.1	-0.381988	1.87e-09	8.83e-09	1
PLEKHM1	17q21.31	0.378482	2.06e-09	9.67e-09	1
TLR5	1q41	0.620227	2.07e-09	9.73e-09	1
IGFBP6	12q13.13	1.21876	2.09e-09	9.81e-09	1
KLHL30	2q37.3	1.37356	2.09e-09	9.81e-09	1
SV2C	5q13.3	-1.02278	2.14e-09	1e-08	1
HAUS4	14q11.2	0.400026	2.61e-09	1.21e-08	1
MRPL15	8q11.23	-0.49014	2.96e-09	1.36e-08	1
PAK1	11q13.5-q14.1	0.647023	3.27e-09	1.5e-08	1
ARPC5L	9q33.3	-0.403186	3.28e-09	1.5e-08	1
HK2	2p12	-0.862404	3.29e-09	1.5e-08	1
KLHL15	Xp22.11	0.554652	3.52e-09	1.6e-08	1
INTS5	11q12.3	-0.346428	3.58e-09	1.63e-08	1
2019-09-02		0.273792	3.62e-09	1.64e-08	1
GALNT10	5q33.2	-0.551524	3.71e-09	1.68e-08	1
CCDC57	17q25.3	-0.549645	3.94e-09	1.78e-08	1
KRT19	17q21.2	1.33219	4.13e-09	1.86e-08	1
TPSG1	16p13.3	1.14347	4.28e-09	1.93e-08	1
TDP2	6p22.3	0.46017	4.48e-09	2.01e-08	1
E4F1	16p13.3	-0.449683	4.48e-09	2.01e-08	1
TTC38	22q13.31	-0.543461	4.49e-09	2.02e-08	1
MTHFD1L	6q25.1	-0.739398	4.62e-09	2.07e-08	1
TECPR1	7q21.3	-0.664035	4.69e-09	2.1e-08	1
SLC35C2	20q13.12	-0.320023	4.93e-09	2.2e-08	1
TRMT1	19p13.13	-0.480189	4.94e-09	2.2e-08	1
DOPEY1	6q14.1	0.549032	4.94e-09	2.2e-08	1
NAAA	4q21.1	-0.667822	5.1e-09	2.27e-08	1
IL1RL1	2q12.1	1.44639	5.3e-09	2.35e-08	1
VPS11	11q23.3	0.273973	5.42e-09	2.4e-08	1
IGF2BP2	3q27.2	1.13408	5.57e-09	2.46e-08	1
WDR3	1p12	-0.441666	6.08e-09	2.68e-08	1
KRT18	12q13.13	-0.605137	6.33e-09	2.79e-08	1
PIK3C3	18q12.3	0.298881	6.43e-09	2.83e-08	1
GAD1	2q31.1	-1.14218	6.71e-09	2.95e-08	1
ZNF395	8p21.1	0.39506	7.18e-09	3.14e-08	1
PRKAR1A	17q24.2	0.338102	7.86e-09	3.42e-08	1
C7	5p13.1	1.41126	8.28e-09	3.59e-08	1
HOXB3	17q21.32	1.19035	8.52e-09	3.69e-08	1
AXL	19q13.2	0.783002	8.54e-09	3.69e-08	1
ASB1	2q37.3	0.380609	8.61e-09	3.72e-08	1
ATP10A	15q12	-0.852632	8.67e-09	3.74e-08	1
SLC26A3	7q22.3-q31.1	2.45341	8.98e-09	3.86e-08	1
PSAT1	9q21.2	-0.77257	9e-09	3.87e-08	1
LAMA4	6q21	0.843914	9.9e-09	4.23e-08	1
CES2	16q22.1	0.347612	1.04e-08	4.44e-08	1
FER1L5	2q11.2	1.02248	1.05e-08	4.48e-08	1
TBX1	22q11.21	-1.51472	1.08e-08	4.61e-08	1
AFAP1L1	5q32	0.701373	1.12e-08	4.75e-08	1
PTN	7q33	1.41241	1.14e-08	4.83e-08	1
EPB41L2	6q23.1-q23.2	0.786056	1.18e-08	4.98e-08	1
ZKSCAN1	7q22.1	-0.453355	1.21e-08	5.09e-08	1
NXN	17p13.3	0.425402	1.21e-08	5.11e-08	1
ANAPC2	9q34.3	-0.349522	1.26e-08	5.31e-08	1
ZNF606	19q13.43	-0.366945	1.28e-08	5.4e-08	1
SIX2	2p21	1.2593	1.3e-08	5.47e-08	1
NVL	1q42.11	-0.536999	1.32e-08	5.53e-08	1
TRPV6	7q34	-0.809384	1.37e-08	5.72e-08	1
LARS	5q32	-0.278248	1.39e-08	5.79e-08	1
B3GNT3	19p13.11	1.87167	1.41e-08	5.9e-08	1
MBNL3	Xq26.2	0.854065	1.46e-08	6.07e-08	1
AGPAT4	6q26	0.761418	1.52e-08	6.32e-08	1
CROT	7q21.12	0.5457	1.59e-08	6.6e-08	1
MSH5-SAPCD1	6p21.33	-0.897536	1.6e-08	6.63e-08	1
HEY2	6q22.31	-0.999422	1.63e-08	6.75e-08	1
MYOT	5q31.2	1.69143	1.66e-08	6.85e-08	1
HDLBP	2q37.3	-0.33911	1.73e-08	7.11e-08	1
SLCO2A1	3q22.1-q22.2	0.785101	1.82e-08	7.47e-08	1
TAF6L	11q12.3	-0.36429	1.83e-08	7.5e-08	1
FAM122A	9q21.11	0.289404	1.85e-08	7.6e-08	1
USP54	10q22.2	-0.625358	1.89e-08	7.73e-08	1
KRT86	12q13	1.14853	1.97e-08	8.03e-08	1
MIPOL1	14q13.3-q21.1	-0.43012	1.97e-08	8.06e-08	1
HEATR3	16q12.1	-0.397538	1.99e-08	8.13e-08	1
ARC	8q24.3	1.38755	2e-08	8.16e-08	1
ENOPH1	4q21.22	-0.368256	2.24e-08	9.08e-08	1
APOL1	22q12.3	0.867712	2.34e-08	9.48e-08	1
TRMT2A	22q11.21	-0.434113	2.44e-08	9.83e-08	1
DTL	1q32.3	-0.894969	2.47e-08	9.97e-08	1
NMNAT1	1p36.22	0.261301	2.6e-08	1.05e-07	1
SP140L	2q37.1	0.826635	2.69e-08	1.08e-07	1
ENGASE	17q25.3	-0.527044	2.69e-08	1.08e-07	1
TRAIP	3p21.31	-0.478576	2.72e-08	1.09e-07	1
CDC14B	9q22.32-q22.33	0.652493	2.81e-08	1.12e-07	1
TMEM136	11q23.3	-0.544157	2.82e-08	1.13e-07	1
PTPRZ1	7q31.32	1.72271	2.85e-08	1.14e-07	1
HIPK4	19q13.2	0.694399	3.24e-08	1.29e-07	1
UTP3	4q13.3	-0.274637	3.36e-08	1.33e-07	1
EVX1	7p15.2	1.19385	3.38e-08	1.34e-07	1
TCF4	18q21.2	0.58444	3.4e-08	1.35e-07	1
MAP3K7	6q15	0.317097	3.43e-08	1.36e-07	1
NKTR	3p22.1	-0.520737	3.5e-08	1.39e-07	1
NAA60	16p13.3	-0.452086	3.67e-08	1.45e-07	1
ADCY3	2p23.3	0.617436	3.86e-08	1.52e-07	1
SYPL1	7q22.2	0.314662	3.99e-08	1.57e-07	1
NELL2	12q12	1.27221	3.99e-08	1.57e-07	1
HIST1H2BE	6p22.2	-1.16684	4.09e-08	1.61e-07	1
MCM7	7q22.1	-0.399046	4.41e-08	1.72e-07	1
BTN2A3P	6p22.2	0.658256	4.46e-08	1.74e-07	1
FHIT	3p14.2	-0.64854	5.15e-08	1.99e-07	1
GAL3ST3	11q13.1	1.31439	5.32e-08	2.05e-07	1
POLD3	11q13.4	0.263199	5.42e-08	2.09e-07	1
TBC1D19	4p15.2	0.306078	5.5e-08	2.12e-07	1
MYLK4	6p25.2	0.548336	5.56e-08	2.14e-07	1
INTS1	7p22.3	-0.378395	5.82e-08	2.23e-07	1
SHC4	15q21.1	0.79174	6.27e-08	2.4e-07	1
AP5Z1	7p22.1	-0.370165	6.45e-08	2.46e-07	1
NBEAP1	15q11.2	-2.5334	6.61e-08	2.52e-07	1
C6orf89	6p21.2	0.217941	6.64e-08	2.53e-07	1
XK	Xp21.1	1.19529	6.71e-08	2.55e-07	1
SERPING1	11q12.1	0.814329	6.9e-08	2.62e-07	1
EBF4	20p13	0.6953	7.03e-08	2.67e-07	1
KNSTRN	15q15.1	-0.500743	7.18e-08	2.72e-07	1
SLC22A3	6q25.3	1.41289	7.64e-08	2.88e-07	1
TTC22	1p32.3	1.13834	7.7e-08	2.9e-07	1
TDRD6	6p12.3	-1.13881	7.78e-08	2.93e-07	1
HIRIP3	16p11.2	0.320913	8.07e-08	3.03e-07	1
KPNA4	3q25.33	0.274787	8.16e-08	3.06e-07	1
MEF2C	5q14.3	0.815721	8.29e-08	3.11e-07	1
AP4E1	15q21.2	0.349851	8.78e-08	3.28e-07	1
ESCO2	8p21.1	-0.981924	8.95e-08	3.34e-07	1
ETV6	12p13.2	0.401295	8.97e-08	3.35e-07	1
SORBS3	8p21.3	0.496113	9.17e-08	3.42e-07	1
ARHGAP11B	15q13.2	-0.650334	9.58e-08	3.57e-07	1
VANGL2	1q23.2	1.09218	9.8e-08	3.64e-07	1
XPNPEP3	22q13.2	-0.284063	1.02e-07	3.77e-07	1
ATR	3q23	-0.404309	1.04e-07	3.85e-07	1
DHPS	19p13.13	-0.356738	1.05e-07	3.87e-07	1
HSPA1L	6p21.33	0.384742	1.15e-07	4.23e-07	1
WDR43	2p23.2	-0.303091	1.16e-07	4.25e-07	1
HIST2H2AC	1q21.2	-0.725118	1.17e-07	4.3e-07	1
MID1	Xp22	0.767712	1.21e-07	4.44e-07	1
CDH19	18q22.1	1.74875	1.24e-07	4.53e-07	1
CRK	17p13.3	0.27615	1.27e-07	4.64e-07	1
SNX33	15q24.2	0.295059	1.28e-07	4.69e-07	1
SDC1	2p24.1	0.936939	1.28e-07	4.69e-07	1
SLFN5	17q12	0.640726	1.31e-07	4.78e-07	1
HYAL1	3p21.31	0.55537	1.38e-07	5.02e-07	1
DNAJB11	3q27.3	-0.326101	1.48e-07	5.35e-07	1
FAM102B	1p13.3	0.518783	1.53e-07	5.53e-07	1
PRMT6	1p13.3	-0.477524	1.55e-07	5.61e-07	1
CYP2W1	7p22.3	1.48276	1.58e-07	5.71e-07	1
FZD3	8p21.1	0.575436	1.61e-07	5.8e-07	1
EPHB3	3q27.1	-0.648613	1.63e-07	5.87e-07	1
SLC25A23	19p13.3	0.34375	1.63e-07	5.87e-07	1
FHOD1	16q22.1	-0.412465	1.77e-07	6.34e-07	1
POLG	15q26.1	-0.261919	1.77e-07	6.35e-07	1
CDH22	20q13.12	1.60493	1.86e-07	6.65e-07	1
MRC2	17q23	0.709261	1.88e-07	6.7e-07	1
BMPR1B	4q22.3	-0.735871	1.96e-07	6.97e-07	1
ENOX1	13q14.11	-0.63778	2.02e-07	7.18e-07	1
TLDC1	16q24.1	0.285716	2.16e-07	7.66e-07	1
MPHOSPH10	2p13.3	-0.28261	2.28e-07	8.05e-07	1
PABPC3	13q12.13	-0.664268	2.39e-07	8.41e-07	1
RINT1	7q22.3	-0.323659	2.39e-07	8.41e-07	1
CSDE1	1p13.2	0.235715	2.42e-07	8.49e-07	1
UNC5A	5q35.2	-2.06853	2.44e-07	8.57e-07	1
PIBF1	13q21.33-q22.1	0.356455	2.6e-07	9.08e-07	1
CYP2D6	22q13.2	-0.789634	2.77e-07	9.67e-07	1
MCAT	22q13.2	-0.408055	2.78e-07	9.68e-07	1
ADAM19	5q33.3	0.842063	3.06e-07	1.06e-06	1
SEC61A1	3q21.3	-0.36625	3.07e-07	1.06e-06	1
CSTF3	11p13	-0.250138	3.12e-07	1.08e-06	1
RBM6	3p21.31	-0.457426	3.16e-07	1.09e-06	1
RFK	9q21.13	-0.39078	3.31e-07	1.14e-06	1
NPDC1	9q34.3	-0.55189	3.33e-07	1.15e-06	1
ARAP3	5q31.3	0.619587	3.58e-07	1.23e-06	1
SF3A3	1p34.3	0.176855	3.77e-07	1.29e-06	1
CD207	2p13.3	1.1424	4.02e-07	1.37e-06	1
KIF6	6p21.2	0.907931	4.24e-07	1.44e-06	1
MAGED1	Xp11.22	-0.454696	4.25e-07	1.45e-06	1
SMAD9	13q13.3	0.550612	4.27e-07	1.45e-06	1
PKP2	12p11.21	0.439247	4.28e-07	1.46e-06	1
NR4A3	9q22	1.54121	4.35e-07	1.47e-06	1
PCDHB16	5q31.3	-1.22645	4.67e-07	1.58e-06	1
PIEZO2	18p11.22-p11.21	0.825203	4.81e-07	1.62e-06	1
KBTBD3	11q22.3	0.315747	4.83e-07	1.63e-06	1
KIAA1217	10p12.2-p12.1	0.395437	5.15e-07	1.73e-06	1
LZTR1	22q11.21	-0.281966	5.36e-07	1.8e-06	1
NIM1K	5p12	0.513052	5.9e-07	1.97e-06	1
TICRR	15q26.1	-0.691317	6.03e-07	2.01e-06	1
INSIG1	7q36.3	0.703046	6.05e-07	2.01e-06	1
LMNA	1q22	0.536074	6.24e-07	2.07e-06	1
RPRD1B	20q11.23	-0.354853	6.28e-07	2.09e-06	1
DPY19L2P2	7q22.1	0.793607	6.48e-07	2.15e-06	1
PCYOX1L	5q32	-0.35042	6.53e-07	2.16e-06	1
SLC9B2	4q24	0.721556	6.7e-07	2.21e-06	1
NRBP1	2p23.3	0.205291	7e-07	2.31e-06	1
WASF3	13q12.13	-0.521304	7.58e-07	2.49e-06	1
FBXO5	6q25.2	-0.357659	7.84e-07	2.58e-06	1
ACP1	2p25.3	-0.23684	8.01e-07	2.63e-06	1
RHOT1	17q11.2	0.240433	8.09e-07	2.65e-06	1
AQP4	18q11.2	0.940415	8.2e-07	2.68e-06	1
RBMX	Xq26.3	-0.207805	8.34e-07	2.73e-06	1
SSH1	12q24.11	0.354054	8.37e-07	2.74e-06	1
MRTO4	1p36.13	-0.331216	8.44e-07	2.76e-06	1
NID2	14q22.1	0.875935	8.58e-07	2.8e-06	1
GRPR	Xp22.2	-1.60086	8.61e-07	2.81e-06	1
SEL1L	14q31	-0.546836	8.66e-07	2.82e-06	1
GNL1	6p21.33	0.294781	9.16e-07	2.97e-06	1
BLCAP	20q11.23	0.272595	9.16e-07	2.97e-06	1
ABCC3	17q21.33	1.04431	9.33e-07	3.03e-06	1
RFFL	17q12	-0.369134	9.39e-07	3.04e-06	1
ADAM28	8p21.2	0.832034	9.68e-07	3.13e-06	1
EXOSC5	19q13.2	-0.467588	9.86e-07	3.19e-06	1
KLHL36	16q24.1	0.371391	1.03e-06	3.31e-06	1
DIMT1	5q12.1	0.268098	1.06e-06	3.42e-06	1
KLK1	19q13.33	1.25043	1.13e-06	3.63e-06	1
GLI4	8q24.3	-0.507652	1.18e-06	3.78e-06	1
MFAP5	12p13.31	1.40061	1.19e-06	3.79e-06	1
FBXO16	8p21.1	0.445263	1.19e-06	3.8e-06	1
PCNT	21q22.3	-0.308359	1.23e-06	3.92e-06	1
ZNF76	6p21.31	-0.213286	1.23e-06	3.92e-06	1
DIO1	1p32.3	-1.51985	1.25e-06	3.97e-06	1
AMZ2P1	17q24.1	0.327818	1.25e-06	3.98e-06	1
TMEM192	4q32.3	-0.345187	1.38e-06	4.35e-06	1
TRPV4	12q24.11	0.944897	1.39e-06	4.39e-06	1
CACNB2	10p12	0.508079	1.42e-06	4.48e-06	1
S100A8	1q21.3	1.15859	1.45e-06	4.58e-06	1
VSIG10	12q24.23	-0.290492	1.47e-06	4.61e-06	1
NDC80	18p11.32	0.607061	1.47e-06	4.64e-06	1
TFDP2	3q23	0.262765	1.5e-06	4.71e-06	1
ITGA6	2q31.1	0.426162	1.55e-06	4.86e-06	1
MYO16	13q33.3	0.9343	1.56e-06	4.87e-06	1
CSF3	17q21.1	2.14214	1.64e-06	5.13e-06	1
C2orf42	2p13.3	0.180388	1.73e-06	5.37e-06	1
PSMG3	7p22.3	-0.44648	1.8e-06	5.59e-06	1
DHX32	10q26.2	-0.315271	1.84e-06	5.7e-06	1
CALCOCO1	12q13.13	0.265557	1.85e-06	5.73e-06	1
SP100	2q37.1	0.471487	1.89e-06	5.87e-06	1
MCTP1	5q15	-0.667625	1.95e-06	6.01e-06	1
IFI30	19p13.11	-0.834419	1.98e-06	6.1e-06	1
ENC1	5q13.3	-0.621024	2.02e-06	6.24e-06	1
CAMK2D	4q26	0.435819	2.09e-06	6.42e-06	1
BMP6	6p24.3	-0.988187	2.13e-06	6.55e-06	1
TANK	2q24.2	0.270148	2.15e-06	6.6e-06	1
MARS	12q13.3	-0.250086	2.19e-06	6.71e-06	1
KPNA5	6q22.1	0.424605	2.21e-06	6.79e-06	1
SIRT7	17q25.3	-0.315447	2.22e-06	6.79e-06	1
MSRB1	16p13.3	0.39314	2.28e-06	6.99e-06	1
NEDD4	15q21.3	0.534862	2.3e-06	7.04e-06	1
C15orf56	15q15.1	0.946532	2.35e-06	7.19e-06	1
SDCBP2	20p13	0.763813	2.58e-06	7.85e-06	1
KCNAB3	17p13.1	-0.74604	2.67e-06	8.11e-06	1
GAL3ST1	22q12.2	0.881175	2.69e-06	8.17e-06	1
SLC6A6	3p25.1	0.631352	2.69e-06	8.18e-06	1
RFC3	13q13.2	-0.509655	2.81e-06	8.52e-06	1
GIPC3	19p13.3	0.714222	2.82e-06	8.53e-06	1
DUSP4	8p12	1.00925	2.9e-06	8.76e-06	1
SCAP	3p21.31	-0.26639	2.9e-06	8.76e-06	1
IRX3	16q12.2	0.625736	3.07e-06	9.23e-06	1
TBC1D15	12q21.1	-0.257598	3.2e-06	9.6e-06	1
SHE	1q21.3	0.600651	3.24e-06	9.71e-06	1
PCDHB11	5q31.3	-1.18059	3.24e-06	9.71e-06	1
COG6	13q14.11	0.3745	3.34e-06	9.98e-06	1
ZNF215	11p15.4	0.958428	3.39e-06	1.01e-05	1
CUTC	10q24.2	0.318936	3.43e-06	1.02e-05	1
ADGRG1	16q21	0.468436	3.46e-06	1.03e-05	1
LYAR	4p16.3	-0.322049	3.5e-06	1.04e-05	1
ZKSCAN7	3p21.31	0.538816	3.53e-06	1.05e-05	1
KCNN3	1q21.3	0.762617	3.58e-06	1.06e-05	1
DIO3	14q32.31	0.832889	3.6e-06	1.07e-05	1
TTC21A	3p22.2	-0.445075	3.67e-06	1.09e-05	1
DDX17	22q13.1	-0.280636	3.69e-06	1.1e-05	1
CCDC39	3q26.33	-0.609841	3.84e-06	1.14e-05	1
CNPY2	12q13.3	-0.357375	3.85e-06	1.14e-05	1
SERGEF	11p15.1	-0.476543	3.96e-06	1.17e-05	1
IRF9	14q12	-0.656726	4.06e-06	1.2e-05	1
TFCP2L1	2q14.2	1.13126	4.06e-06	1.2e-05	1
ZNF839	14q32.31	-0.275815	4.25e-06	1.25e-05	1
RIOK1	6p24.3	-0.224586	4.31e-06	1.27e-05	1
ARID3B	15q24.1	-0.291837	4.43e-06	1.3e-05	1
FDFT1	8p23.1	0.487913	4.69e-06	1.37e-05	1
ZNF212	7q36.1	-0.21249	4.76e-06	1.39e-05	1
PLA2G2A	1p36.13	-1.76147	4.99e-06	1.46e-05	1
ERLEC1	2p16.2	0.349872	5.01e-06	1.46e-05	1
TBX5	12q24.21	1.35908	5.11e-06	1.49e-05	1
CACNA2D4	12p13.33	0.534263	5.19e-06	1.51e-05	1
ACVR1C	2q24.1	0.635012	5.27e-06	1.53e-05	1
TNFRSF18	1p36.33	-0.834608	5.31e-06	1.54e-05	1
CLCN5	Xp11.23	-0.419947	5.7e-06	1.65e-05	1
DECR1	8q21.3	-0.381614	5.82e-06	1.68e-05	1
DUSP1	5q35.1	0.785387	6.06e-06	1.74e-05	1
SGSM1	22q11.23	0.644699	6.17e-06	1.77e-05	1
FAM227B	15q21.2	0.294713	6.22e-06	1.78e-05	1
PODN	1p32.3	0.795862	6.33e-06	1.81e-05	1
RSBN1	1p13.2	0.262011	6.59e-06	1.88e-05	1
NEBL	10p12.31	0.505836	6.8e-06	1.94e-05	1
ACTR5	20q11.23	-0.235145	6.92e-06	1.97e-05	1
SLC16A3	17q25.3	0.608641	7.13e-06	2.03e-05	1
UNC13B	9p13.3	-0.482046	7.32e-06	2.08e-05	1
RSPO1	1p34.3	0.928471	7.46e-06	2.12e-05	1
PLOD3	7q22.1	-0.314158	7.56e-06	2.14e-05	1
GNA13	17q24.1	0.315954	8.05e-06	2.28e-05	1
ZCWPW1	7q22.1	0.35936	8.11e-06	2.29e-05	1
KIF5C	2q23.1-q23.2	-0.541502	8.12e-06	2.29e-05	1
LUC7L	16p13.3	-0.450354	8.16e-06	2.3e-05	1
HAUS1	18q21.1	0.295373	8.21e-06	2.32e-05	1
C6orf62	6p22.3	-0.219175	8.39e-06	2.37e-05	1
EIF5	14q32.32	0.247619	8.65e-06	2.44e-05	1
STK11IP	2q35	-0.278885	8.9e-06	2.5e-05	1
RERGL	12p12.3	0.999122	8.92e-06	2.51e-05	1
ZNF579	19q13.42	-0.427654	9.23e-06	2.59e-05	1
TUBB4A	19p13.3	-1.54509	9.33e-06	2.62e-05	1
CSAD	12q13.13	-0.570125	1.01e-05	2.81e-05	1
PRKAB1	12q24.23	0.226495	1.02e-05	2.83e-05	1
C9orf85	9q21.13	-0.249815	1.03e-05	2.87e-05	1
HNRNPD	4q21.22	-0.186496	1.03e-05	2.88e-05	1
AKAP12	6q25.1	0.724462	1.05e-05	2.93e-05	1
STK24	13q32.2	0.347485	1.09e-05	3.02e-05	1
WWC2	4q35.1	0.513981	1.1e-05	3.05e-05	1
HS6ST1	2q14.3	0.354063	1.1e-05	3.05e-05	1
PIGO	9p13.3	-0.359768	1.11e-05	3.09e-05	1
RTF1	15q15.1	0.20382	1.12e-05	3.09e-05	1
RWDD2A	6q14.1	-0.418163	1.18e-05	3.25e-05	1
ABCC8	11p15.1	1.02873	1.27e-05	3.48e-05	1
APRT	16q24.3	-0.519588	1.28e-05	3.52e-05	1
GLT8D2	12q23.3	0.598489	1.28e-05	3.52e-05	1
MMP24	20q11.22	0.554338	1.33e-05	3.64e-05	1
RBM12B	8q22.1	-0.354021	1.35e-05	3.69e-05	1
SYNE3	14q32.13	0.604284	1.42e-05	3.88e-05	1
DONSON	21q22.11	-0.32803	1.46e-05	3.97e-05	1
MCM2	3q21.3	-0.365956	1.46e-05	3.97e-05	1
ADAM23	2q33.3	0.759957	1.51e-05	4.09e-05	1
ETFA	15q24.2-q24.3	-0.312776	1.51e-05	4.11e-05	1
SLC20A1	2q14.1	-0.316274	1.53e-05	4.15e-05	1
STS	Xp22.31	0.41021	1.57e-05	4.25e-05	1
FOXN1	17q11.2	0.938541	1.6e-05	4.33e-05	1
CHRD	3q27.1	-0.747996	1.69e-05	4.54e-05	1
EPN1	19q13.42	-0.321877	1.71e-05	4.6e-05	1
GRM2	3p21.2	-0.638422	1.73e-05	4.66e-05	1
CPT1C	19q13.33	0.575334	1.79e-05	4.79e-05	1
RNF220	1p34.1	-0.168648	1.84e-05	4.92e-05	1
INHA	2q35	-0.763873	1.85e-05	4.95e-05	1
LARS2	3p21.31	-0.286523	1.89e-05	5.04e-05	1
ZNF93	19p12	-0.346651	1.9e-05	5.07e-05	1
PAGR1	16p11.2	-0.332452	1.94e-05	5.16e-05	1
CDK5	7q36.1	-0.340477	1.98e-05	5.26e-05	1
QKI	6q26	0.403433	2.02e-05	5.37e-05	1
SLC39A14	8p21.3	0.351466	2.04e-05	5.43e-05	1
WSB1	17q11.1	-0.41353	2.1e-05	5.56e-05	1
TBC1D22A	22q13.31	0.231841	2.14e-05	5.65e-05	1
SLC25A13	7q21.3	-0.3318	2.14e-05	5.65e-05	1
TYW3	1p31.1	0.215133	2.25e-05	5.92e-05	1
NPEPL1	20q13.32	-0.50265	2.26e-05	5.95e-05	1
COQ7	16p12.3	-0.212934	2.28e-05	6e-05	1
TBC1D22B	6p21.2	-0.288228	2.29e-05	6.02e-05	1
ELP5	17p13.1	0.288116	2.29e-05	6.03e-05	1
TRIM37	17q22	-0.270399	2.29e-05	6.04e-05	1
NPTX1	17q25.3	0.913696	2.46e-05	6.45e-05	1
TUBGCP6	22q13.33	-0.316264	2.47e-05	6.48e-05	1
ZSCAN25	7q22.1	0.233691	2.57e-05	6.72e-05	1
GPR155	2q31.1	0.465804	2.62e-05	6.85e-05	1
TRIM38	6p22.2	0.494054	2.66e-05	6.93e-05	1
PTPN23	3p21.31	-0.233806	2.67e-05	6.96e-05	1
CCL14	17q12	0.899177	2.72e-05	7.09e-05	1
PBX3	9q33.3	-0.259199	2.74e-05	7.14e-05	1
LILRB3	19q13.42	-0.572586	2.75e-05	7.15e-05	1
SLC9A5	16q22.1	-0.563302	2.83e-05	7.34e-05	1
TMEM45A	3q12.2	0.668891	2.85e-05	7.4e-05	1
CYP4F2	19p13.12	2.02427	2.9e-05	7.53e-05	1
SEMA3F	3p21.31	0.511823	2.92e-05	7.57e-05	1
VPS54	2p15-p14	-0.301846	3.07e-05	7.92e-05	1
GSE1	16q24.1	-0.335619	3.13e-05	8.07e-05	1
SUMF2	7p11.2	0.306139	3.15e-05	8.11e-05	1
CLGN	4q31.1	-0.748326	3.17e-05	8.16e-05	1
DCBLD1	6q22.1	-0.321655	3.18e-05	8.18e-05	1
ZC3H3	8q24.3	-0.296181	3.19e-05	8.21e-05	1
NXPE4	11q23.2	1.78769	3.19e-05	8.22e-05	1
MAPKAPK3	3p21.2	-0.323019	3.29e-05	8.45e-05	1
HAP1	17q21.2	0.780421	3.33e-05	8.54e-05	1
CREB3	9p13.3	0.288188	3.37e-05	8.63e-05	1
SPTAN1	9q34.11	0.229453	3.48e-05	8.89e-05	1
CDKN2AIPNL	5q31.1	-0.314913	3.53e-05	9.01e-05	1
ZNF83	19q13.41	-0.369748	3.55e-05	9.06e-05	1
ORC3	6q15	0.268675	3.56e-05	9.08e-05	1
FAHD2A	2q11.1	-0.247212	3.84e-05	9.76e-05	1
NDEL1	17p13.1	0.243129	3.85e-05	9.78e-05	1
CHRDL2	11q13.4	1.06032	3.99e-05	0.00010113	1
ABHD17B	9q21.13	-0.339359	4e-05	0.000101358	1
ZNF678	1q42.13	-0.293873	4e-05	0.000101387	1
HERPUD1	16q13	0.46664	4.03e-05	0.000102028	1
PIK3R5	17p13.1	-0.567649	4.13e-05	0.000104262	1
SCAF1	19q13.3-q13.4	-0.249172	4.16e-05	0.000105075	1
ZNF43	19p12	-0.294825	4.4e-05	0.00011082	1
NAT10	11p13	-0.184399	4.48e-05	0.000112701	1
GPC6	13q31.3-q32.1	0.644955	4.61e-05	0.000115691	1
KIAA1024	15q25.1	-0.589536	4.68e-05	0.000117247	1
ZNF286A	17p12	0.269178	4.68e-05	0.000117247	1
ZSWIM3	20q13.12	-0.282886	4.73e-05	0.000118448	1
GPAT2	2q11.2	0.877989	4.79e-05	0.000119942	1
TAOK2	16p11.2	-0.192663	4.83e-05	0.00012075	1
NCOA5	20q13.12	-0.163239	4.94e-05	0.00012338	1
USP53	4q26	0.371983	5.14e-05	0.000128183	1
BTBD7	14q32.12	0.254763	5.28e-05	0.000131428	1
ZBTB17	1p36.13	-0.240635	5.37e-05	0.000133487	1
MSH2	2p21-p16.3	-0.319193	5.54e-05	0.000137647	1
EIF2AK4	15q15.1	-0.289757	5.59e-05	0.000138572	1
NT5C3A	7p14.3	-0.280477	5.59e-05	0.000138688	1
MYO5C	15q21.2	-0.352945	5.63e-05	0.000139433	1
SCYL1	11q13.1	-0.231993	5.67e-05	0.000140463	1
UBA7	3p21.31	0.536085	5.68e-05	0.000140613	1
BRIP1	17q23.2	-0.528007	5.79e-05	0.000143168	1
SLC25A38	3p22.1	-0.222041	5.83e-05	0.000144079	1
CYP7B1	8q12.3	0.545207	6.15e-05	0.000151357	1
TEAD2	19q13.3	0.51536	6.61e-05	0.000161784	1
CKB	14q32.33	0.568995	6.81e-05	0.000166497	1
TOP1	20q12	-0.297578	6.82e-05	0.000166649	1
AAMP	2q35	-0.211358	6.87e-05	0.000167705	1
WDR13	Xp11.23	-0.313505	6.87e-05	0.000167716	1
LIMK2	22q12.2	0.309373	6.89e-05	0.000168183	1
CCNB1IP1	14q11.2	0.291703	6.9e-05	0.000168398	1
GBGT1	9q34.2	0.484133	6.97e-05	0.000169948	1
CAPN12	19q13.2	0.650321	7e-05	0.000170622	1
ZFYVE1	14q24.2	0.182915	7.17e-05	0.000174544	1
SOX13	1q32.1	0.277893	7.19e-05	0.000175187	1
CCDC148	2q24.1	0.425005	7.36e-05	0.000178714	1
LRRN1	3p26.2	-1.09056	7.7e-05	0.000186529	1
SFT2D1	6q27	-0.261752	7.88e-05	0.000190641	1
FIBP	11q13.1	-0.270359	8.2e-05	0.00019806	1
TIAM1	21q22.11	0.528795	8.39e-05	0.000202343	1
PARN	16p13.12	0.147022	8.44e-05	0.000203399	1
CDS1	4q21.23	-0.317387	8.47e-05	0.000203971	1
HNRNPA1	12q13.13	-0.228828	8.47e-05	0.000203971	1
TSC22D4	7q22.1	-0.271682	8.54e-05	0.000205692	1
DCAF4	14q24.2	-0.194665	8.61e-05	0.000207003	1
TPM4	19p13.12-p13.11	0.307753	8.62e-05	0.000207315	1
PLB1	2p23.2	0.351701	9.18e-05	0.000219837	1
PNRC1	6q15	0.293445	9.3e-05	0.000222437	1
MYO7B	2q14.3	0.611585	9.47e-05	0.00022614	1
ADNP	20q13.13	-0.207601	9.89e-05	0.000235403	1
SEZ6L2	16p11.2	-0.585305	9.92e-05	0.00023617	1
LOX	5q23.1	-0.727639	9.97e-05	0.000237102	1
COMMD6	13q22.2	0.363359	0.000103324	0.000245211	1
NIT1	1q23.3	0.190489	0.000105448	0.000249993	1
ZNF646	16p11.2	-0.221452	0.000106689	0.000252816	1
CNKSR3	6q25.2	-0.41374	0.000110698	0.000261766	1
GAS2L3	12q23.1	-0.52501	0.000118253	0.000278595	1
NFYC	1p34.2	0.140752	0.000118273	0.000278606	1
TANC1	2q24.2	-0.41212	0.000120092	0.000282494	1
YTHDC2	5q22.2	-0.312555	0.000120207	0.000282634	1
RPL7	8q21.11	-0.34434	0.000121343	0.000285146	1
RTKN	2p13.1	-0.3594	0.000121924	0.000286364	1
SUPV3L1	10q22.1	-0.19078	0.000122878	0.000288421	1
FRY	13q13.1	0.474595	0.000124374	0.000291591	1
LINC00969		-0.490754	0.000126103	0.000295314	1
FMO1	1q24.3	0.686374	0.000127844	0.000299011	1
GANAB	11q12.3	-0.22928	0.000131274	0.000306644	1
E2F8	11p15.1	-0.772908	0.000152203	0.000353338	1
SLC7A8	14q11.2	0.515511	0.000156789	0.000363344	1
GIPR	19q13.32	0.830442	0.00015762	0.000365132	1
SCN3A	2q24.3	0.715583	0.000159224	0.00036857	1
EPDR1	7p14.1	0.436275	0.000160825	0.000371574	1
LIMK1	7q11.23	-0.23291	0.000160978	0.000371881	1
TNFAIP3	6q23.3	0.581877	0.000161677	0.000373385	1
CERS5	12q13.12	0.16832	0.000162981	0.000375943	1
ZNF319	16q21	0.238707	0.000164678	0.000379525	1
OSR1	2p24.1	0.640365	0.00016543	0.000381164	1
GAN	16q23.2	0.335548	0.000167045	0.000384739	1
IRF6	1q32.2	0.309683	0.000167486	0.00038561	1
FRG1	4q35.2	0.208879	0.000169941	0.000390761	1
CRISP2	6p12.3	1.45341	0.000171256	0.000393701	1
METTL6	3p25.1	-0.164795	0.000172494	0.000396349	1
JMJD4	1q42.13	-0.279658	0.000176229	0.000404226	1
ARHGAP25	2p13.3	0.496174	0.00017649	0.000404672	1
TBX15	1p12	-0.985014	0.000181023	0.000414345	1
MMRN1	4q22.1	0.866096	0.000184001	0.000420795	1
KCNC4	1p13.3	0.554194	0.00018567	0.000424349	1
BUD13	11q23.3	0.153476	0.000190101	0.000433991	1
EBP	Xp11.23	0.478172	0.000197083	0.000448755	1
ACADS	12q24.31	0.417608	0.000197163	0.000448814	1
LEF1	4q25	-0.67722	0.000201193	0.000457219	1
PICALM	11q14.2	-0.209997	0.000202687	0.000460217	1
KIAA0319	6p22.3	0.851672	0.000202836	0.000460499	1
TOR1AIP2	1q25.2	0.208318	0.000209481	0.000474298	1
APEH	3p21.31	-0.257889	0.000211098	0.000477843	1
MTCH2	11p11.2	-0.226451	0.000214156	0.000484347	1
KIF3B	20q11.21	-0.22353	0.000219745	0.000495772	1
KLK12	19q13.41	-1.46321	0.00022107	0.000498578	1
MTA1	14q32.33	-0.243898	0.000221562	0.000499504	1
ZNF287	17p11.2	0.208502	0.000224221	0.000504696	1
SORL1	11q24.1	0.496143	0.000224357	0.000504941	1
DDX41	5q35.3	-0.195187	0.000225085	0.000506455	1
C19orf24	19p13.3	-0.419876	0.000227088	0.000510588	1
EHMT2	6p21.33	-0.181415	0.000235758	0.000528278	1
INTS9	8p21.1	0.216337	0.000238305	0.000533398	1
API5	11p12	0.18082	0.000244811	0.000546834	1
KLHL6	3q27.1	-0.613471	0.000247422	0.000552331	1
SHISA4	1q32.1	0.31521	0.000248764	0.000555107	1
NPAS2	2q11.2	-0.407038	0.000252569	0.000563003	1
CFL1	11q13.1	-0.213629	0.000262829	0.000584601	1
ALDH6A1	14q24.3	-0.357665	0.000263977	0.000587082	1
GSTO1	10q25.1	0.325305	0.00026448	0.000588131	1
ATP2B1	12q21.33	-0.288745	0.000264604	0.000588336	1
HNRNPA0	5q31.2	-0.177123	0.000266754	0.000592687	1
MKL1	22q13.1-q13.2	0.17759	0.000276118	0.000612237	1
TTC39B	9p22.3	0.321079	0.000277173	0.000614502	1
ZNF471	19q13.43	-0.256489	0.000282592	0.000625763	1
GTDC1	2q22.3	0.276633	0.000283476	0.000627345	1
BACE1	11q23.3	0.274533	0.000285213	0.00063096	1
SURF4	9q34.2	-0.199992	0.000288133	0.000637114	1
SLC43A3	11q12.1	0.424664	0.000289188	0.000639218	1
CLDN12	7q21.13	-0.304942	0.000290489	0.000641846	1
SPATA20	17q21.33	-0.307285	0.000306147	0.000673793	1
GBA2	9p13.3	-0.217268	0.000309084	0.000679771	1
ATG14	14q22.3	0.164715	0.00032064	0.000704094	1
CXCL1	4q13.3	1.15532	0.000325513	0.000713604	1
ATXN1	6p22.3	0.397537	0.0003264	0.000715378	1
TRIM25	17q23.1	-0.337251	0.000331817	0.000726697	1
LINC00173	12q24.22	-0.804583	0.000334976	0.000732867	1
P2RX5-TAX1BP3	17p13.2	-0.281632	0.000335951	0.000734739	1
GPR107	9q34.11	-0.214581	0.000337995	0.000738945	1
PPIL4	6q25.1	0.190103	0.000343134	0.000749292	1
PNKD	2q35	-0.370136	0.00035255	0.000768384	1
SUN1	7p22.3	-0.199671	0.000359993	0.000782952	1
SOBP	6q21	0.52622	0.000380132	0.000823738	1
UNC13A	19p13.11	-0.765784	0.000382136	0.000827595	1
ADA	20q13.12	0.417543	0.000382316	0.000827886	1
FNBP4	11p11.2	-0.248926	0.00039923	0.000862486	1
SLC25A21	14q13.3	-0.365812	0.000404214	0.000872437	1
SOD3	4p15.2	0.557892	0.000410642	0.000885169	1
MYLK3	16q11.2	0.721141	0.000412845	0.000889294	1
TSG101	11p15.1	-0.15096	0.000414104	0.000891588	1
IARS2	1q41	-0.232765	0.00041521	0.00089376	1
MAP7D2	Xp22.12	0.712579	0.000418925	0.000901232	1
DEK	6p22.3	0.209299	0.000425319	0.000914228	1
GSTO2	10q25.1	0.650869	0.000427807	0.000919052	1
SGPL1	10q22.1	-0.233185	0.000432036	0.000927704	1
NPC2	14q24.3	0.375556	0.000432651	0.000928917	1
NR2F1	5q15	0.531722	0.000434085	0.000931312	1
RASSF9	12q21.31	0.62297	0.00043412	0.000931312	1
ZCCHC4	4p15.2	0.173938	0.000435599	0.000934266	1
DRP2	Xq22.1	0.626351	0.000444766	0.000952377	1
FXR2	17p13.1	0.22642	0.00045117	0.000965191	1
HSPH1	13q12.3	0.321956	0.000452581	0.000967873	1
KLHDC9	1q23.3	-0.315671	0.000463224	0.000988797	1
TWF1	12q12	0.282914	0.000480248	0.00102289	1
METTL18	1q24.2	-0.218924	0.000482995	0.00102838	1
ZNF593	1p36.11	-0.40846	0.000509844	0.00108326	1
XRCC4	5q14.2	0.21148	0.000511014	0.00108512	1
ATXN7	3p14.1	-0.263065	0.00051119	0.00108528	1
MIS12	17p13.2	0.202511	0.000530992	0.00112331	1
COBL	7p12.1	-0.339264	0.000547011	0.00115507	1
ICK	6p12.1	-0.280872	0.000561744	0.00118428	1
PPARG	3p25.2	0.679334	0.000562351	0.00118543	1
ACVR2A	2q22.3-q23.1	0.240761	0.00057785	0.00121629	1
GOT2	16q21	0.301742	0.000581459	0.00122291	1
TRMT6	20p12.3	0.236701	0.000585295	0.00123006	1
NPIPB4	16p12.2	-0.674389	0.00059963	0.00125854	1
SLC11A1	2q35	-0.386132	0.000599736	0.00125862	1
MUT	6p12.3	-0.214363	0.000607504	0.00127347	1
ZNF143	11p15.4	0.155671	0.000607871	0.0012741	1
TMEFF2	2q32.3	-1.21546	0.000613764	0.00128498	1
SMC5	9q21.12	0.220799	0.000618067	0.00129297	1
UNC93A	6q27	-0.851329	0.000654542	0.00136478	1
MIPEP	13q12.12	-0.816645	0.000654704	0.00136496	1
DHFR	5q14.1	-0.397808	0.000687079	0.0014281	1
RAB35	12q24.23	-0.145336	0.000688822	0.00143124	1
CHMP4B	20q11.22	0.188582	0.000691784	0.00143723	1
SLC27A5	19q13.43	-0.378884	0.000720052	0.00149158	1
SHISA2	13q12.13	-0.899659	0.000722359	0.00149602	1
ZNF404	19q13.31	-0.283639	0.00072661	0.00150381	1
BANK1	4q24	-0.874222	0.000733917	0.00151826	1
MEOX2	7p21.2	0.815491	0.000741623	0.00153248	1
COPB1	11p15.2	-0.224392	0.000756798	0.00156156	1
COL14A1	8q24.12	0.636695	0.000781971	0.00160981	1
ZNF777	7q36.1	-0.159908	0.000785498	0.00161643	1
GALNT11	7q36.1	-0.19951	0.000800281	0.00164282	1
TMEM87B	2q13	-0.270025	0.00083779	0.00171618	1
RNF26	11q23	0.164607	0.000856095	0.00174998	1
C14orf79		-0.265001	0.000860362	0.00175832	1
ZIK1	19q13.43	0.559432	0.000872148	0.00178063	1
MMRN2	10q23.2	0.39687	0.000875874	0.00178744	1
ATN1	12p13.31	0.18911	0.000902626	0.00183817	1
BANP	16q24.2	-0.18414	0.000913576	0.00185924	1
CEACAM1	19q13.2	0.662125	0.000913722	0.00185933	1
TRANK1	3p22.2	0.422486	0.000933656	0.00189654	1
DDX27	20q13.13	-0.135891	0.000942962	0.00191397	1
FAM91A1	8q24.13	-0.243767	0.000969508	0.00196439	1
PCDH1	5q31.3	-0.333906	0.000972086	0.00196938	1
SLC16A13	17p13.1	0.390934	0.000974364	0.00197292	1
ARHGAP31	3q13.32-q13.33	0.408407	0.000978257	0.00198059	1
MTMR6	13q12.13	0.208609	0.000980245	0.00198352	1
CSGALNACT1	8p21.3	-0.528817	0.00098492	0.00199277	1
SATB2	2q33.1	-0.3346	0.00101603	0.00205099	1
IGHG1	14q32.33	-1.18281	0.00104989	0.00211446	1
MEX3B	15q25.2	-0.470053	0.00105233	0.00211914	1
NLK	17q11.2	-0.186469	0.001062	0.00213721	1
CEP290	12q21.32	-0.24637	0.00106339	0.00213954	1
IL13RA1	Xq24	-0.216084	0.00108566	0.00218269	1
C9orf139	9q34.3	-0.444711	0.00110897	0.00222615	1
TEK	9p21.2	0.456078	0.00111198	0.00223171	1
GOLGA2P5	12q23.1	-0.402104	0.00111218	0.00223187	1
SHC1	1q21.3	0.168767	0.00113103	0.00226797	1
R3HCC1L	10q24.2	0.197332	0.00113636	0.00227767	1
LRRC37A4P	17q21.31	-0.692068	0.00114699	0.00229797	1
CD34	1q32.2	0.404006	0.00116259	0.00232694	1
RPP38	10p13	-0.164036	0.001171	0.00234301	1
PSMA1	11p15.2	-0.158007	0.0012241	0.00244079	1
EPHB2	1p36.12	0.475293	0.0012277	0.00244664	1
PKNOX2	11q24.2	0.546351	0.00124293	0.00247485	1
ZDHHC14	6q25.3	0.375133	0.00125961	0.00250562	1
EIF2B1	12q24.31	-0.128742	0.00127315	0.00253065	1
MMP17	12q24.33	0.533239	0.00127474	0.00253298	1
IFT43	14q24.3	0.224326	0.00128558	0.00255288	1
UBA5	3q22.1	-0.178393	0.00128789	0.00255691	1
FBXO21	12q24.22	0.188713	0.00128906	0.00255867	1
WDR46	6p21.32	-0.185001	0.0012955	0.00256952	1
TNRC18	7p22.1	-0.220577	0.00132101	0.00261618	1
WWP1	8q21.3	-0.258853	0.00134379	0.00265844	1
SEC14L5	16p13.3	-0.63963	0.00134546	0.00266145	1
ITPKB	1q42.12	0.220877	0.00134705	0.00266425	1
ATP9B	18q23	0.180954	0.00135482	0.00267826	1
NSL1	1q32.3	0.153555	0.00137171	0.00270989	1
HIVEP1	6p24.1	-0.36161	0.00139851	0.002759	1
FAM193A	4p16.3	-0.154065	0.00140069	0.0027624	1
KIF18A	11p14.1	-0.426577	0.00141898	0.00279667	1
WDR31	9q32	0.222415	0.00142663	0.00281056	1
SHROOM2	Xp22.2	-0.268818	0.00145351	0.00285985	1
GBP3	1p22.2	0.713932	0.00147096	0.00289233	1
SERINC3	20q13.12	0.131611	0.00151974	0.00298345	1
RECQL	12p12.1	0.369306	0.00152094	0.0029855	1
PMM1	22q13.2	-0.312743	0.00152923	0.00300082	1
ZFYVE16	5q14.1	-0.24443	0.00153563	0.00301113	1
MORN3	12q24.31	0.480407	0.00155445	0.00304544	1
PSMC6	14q22.1	-0.132889	0.00156165	0.00305791	1
CRNKL1	20p11.23	-0.165651	0.00158542	0.00310019	1
HIST1H2AG	6p22.1	-0.682294	0.00159906	0.00312454	1
CETP	16q13	-0.520347	0.00160861	0.00314153	1
FDXR	17q25.1	0.318214	0.00163934	0.00319645	1
RNF213	17q25.3	-0.284532	0.00164671	0.00320981	1
RBM25	14q24.2	-0.17399	0.00165817	0.00323112	1
GDF6	8q22.1	0.79827	0.00166594	0.00324558	1
ZC3H6	2q14.1	0.218774	0.0016797	0.00326927	1
APLP2	11q24.3	-0.245243	0.00169703	0.00329952	1
GNB1L	22q11.21	-0.29031	0.0017026	0.0033086	1
ANPEP	15q26.1	1.41364	0.00171058	0.00332306	1
CACNA1B	9q34.3	0.909185	0.00172452	0.00334802	1
PLAT	8p11.21	0.686016	0.00174129	0.00337879	1
GALNT14	2p23.1	0.619698	0.00175015	0.00339491	1
TNNI2	11p15.5	0.878321	0.00175093	0.00339609	1
LRRC37B	17q11.2	-0.196888	0.00175753	0.00340709	1
ANXA11	10q22.3	0.214049	0.0017968	0.00347735	1
ACADSB	10q26.13	-0.332359	0.00181277	0.0035068	1
TAGAP	6q25.3	0.56858	0.00182013	0.0035197	1
MECR	1p35.3	-0.171453	0.00182979	0.00353644	1
NDUFA10	2q37.3	-0.161839	0.00184094	0.00355644	1
ARHGAP15	2q22.2-q22.3	0.454899	0.00186844	0.00360541	1
PLEKHH3	17q21.2	0.266873	0.00188877	0.00364251	1
PSMD6	3p14.1	-0.143442	0.00191949	0.00369616	1
COL4A3BP	5q13.3	0.246954	0.00192227	0.00370113	1
EVI5	1p22.1	0.195794	0.0019578	0.00376522	1
HSDL2	9q32	0.201043	0.00199403	0.0038293	1
YY2	Xp22.12	-0.361262	0.00199635	0.00383296	1
ARL2	11q13.1	0.308708	0.00211638	0.00404572	1
ELMO3	16q22.1	-0.349168	0.00212417	0.00405893	1
ZNF597	16p13.3	-0.183275	0.00213405	0.00407652	1
ALDH1A1	9q21.13	0.726948	0.00213978	0.00408705	1
PTCD3	2p11.2	-0.140144	0.00217375	0.00414464	1
SH3D19	4q31.3	0.241072	0.00218157	0.00415868	1
TEX14	17q22	-0.309641	0.00220358	0.00419891	1
UBA6	4q13.2	-0.181966	0.00220576	0.00420219	1
MRPL19	2p12	-0.18819	0.00223315	0.00424998	1
CA8	8q12.1	0.78373	0.00227537	0.00432406	1
SPATA5L1	15q21.1	-0.169489	0.00228644	0.00434241	1
GINS1	20p11.21	-0.354088	0.00232735	0.00441693	1
MCOLN1	19p13.2	-0.173168	0.00233429	0.00442874	1
CAPZA1	1p13.2	-0.155794	0.00235631	0.00446821	1
BBS12	4q27	0.270411	0.00235958	0.00447257	1
SPECC1L	22q11.23	-0.192433	0.00237874	0.00450286	1
GBP4	1p22.2	0.493096	0.00237951	0.00450319	1
KIF2A	5q12.1	0.288281	0.00246579	0.00465188	1
TRAK1	3p22.1	0.209254	0.00248078	0.00467777	1
ELOVL6	4q25	-0.407552	0.00248292	0.00468133	1
NUMB	14q24.3	0.138745	0.002599	0.00488868	1
DHRS13	17q11.2	-0.350454	0.00261875	0.0049213	1
BOLA3	2p13.1	-0.230584	0.00262798	0.00493564	1
TCF19	6p21.33	0.246828	0.00266606	0.00500155	1
HGS	17q25.3	-0.179794	0.00271115	0.00507993	1
IGLV2-23	22q11.22	-1.16638	0.00272217	0.00509851	1
MYO9B	19p13.11	0.153571	0.00272435	0.00510158	1
KMT2E	7q22.3	0.25714	0.0027263	0.00510467	1
SH3GLB2	9q34.11	-0.274415	0.00279537	0.00522446	1
ALOX5AP	13q12.3	0.437308	0.00280677	0.00524363	1
UBALD2	17q25.1	-0.259809	0.00281404	0.00525507	1
ABCA8	17q24.2	0.53492	0.00283104	0.00528413	1
EDF1	9q34.3	-0.29399	0.00286026	0.00533275	1
MFSD6	2q32.2	0.29368	0.00289182	0.00538786	1
ZNF341	20q11.22	-0.148787	0.00291699	0.00543082	1
ALG14	1p21.3	-0.214684	0.00292918	0.00545207	1
PFDN5	12q13.13	0.2409	0.00296513	0.00551322	1
PLXDC1	17q12	-0.36555	0.00297344	0.00552642	1
NUFIP1	13q14.12	0.19913	0.00299239	0.00555829	1
TFG	3q12.2	-0.167567	0.00300859	0.00558635	1
MT-CO2	mitochondria	-0.385197	0.00300871	0.00558635	1
SPIDR	8q11.21	-0.213773	0.00309491	0.00573714	1
TTL	2q14.1	-0.188168	0.00318735	0.00589428	1
SNTB1	8q24.12	0.473435	0.00322688	0.00596259	1
SNX29	16p13.13-p13.12	0.207093	0.00325167	0.00600418	1
ATPAF2	17p11.2	-0.179416	0.00326283	0.00602358	1
ARRDC3	5q14.3	0.342666	0.00327789	0.00604896	1
LEKR1	3q25.31	-0.313055	0.00334715	0.0061669	1
PARS2	1p32.3	-0.190394	0.00344324	0.0063311	1
NUP160	11p11.2	0.199859	0.00351465	0.00645484	1
MRPS9	2q12.1	-0.173418	0.00354282	0.00650204	1
SESN2	1p35.3	0.251772	0.00364722	0.00667306	1
BCL11B	14q32.2	0.574986	0.00366099	0.00669625	1
POMGNT1	1p34.1	-0.190029	0.0036647	0.0067017	1
B2M	15q21.1	0.319017	0.00366934	0.00670885	1
SRSF12	6q15	-0.341113	0.00369435	0.0067479	1
MICAL3	22q11.21	0.32465	0.00375394	0.00684317	1
PCDHGB6	5q31	0.455847	0.00376507	0.00686074	1
RSPRY1	16q13	0.15874	0.00378962	0.00690274	1
KHNYN	14q12	-0.188241	0.00382516	0.00696336	1
CSE1L	20q13.13	-0.148432	0.00385608	0.00701341	1
BPIFB1	20q11.21	0.978461	0.00386468	0.00702696	1
LRP10	14q11.2	0.203372	0.00394492	0.00716015	1
FBXO6	1p36.22	-0.214424	0.00396112	0.00718743	1
CKAP5	11p11.2	-0.187354	0.00399091	0.00723648	1
CSNK1G3	5q23.2	-0.171864	0.00402531	0.00728955	1
CTSG	14q12	0.874464	0.00406215	0.00735135	1
SLC38A2	12q13.11	0.196909	0.00408298	0.00738455	1
DAB2	5p13.1	-0.314595	0.00411751	0.00744261	1
DAGLA	11q12.2	0.351914	0.00414721	0.00749189	1
EXOC3L1	16q22.1	-0.255467	0.00423223	0.00763426	1
IGHV1-46	14q32.33	-1.06589	0.00439009	0.0078989	1
EOMES	3p24.1	-0.704205	0.00455943	0.00817248	1
MTIF2	2p16.1	-0.138634	0.00478782	0.00855024	1
CCNG1	5q34	-0.226965	0.00478838	0.00855041	1
SYTL2	11q14.1	-0.426922	0.00481619	0.00859425	1
SMURF2	17q23.3-q24.1	-0.17456	0.00486109	0.00866178	1
IFT27	22q12.3	-0.180097	0.00503683	0.00895415	1
IGHV3-21	14q32.33	-1.06763	0.00511973	0.00908574	1
AKNA	9q32	0.260125	0.00522537	0.00926251	1
COBLL1	2q24.3	-0.27986	0.00527524	0.00934462	1
IL1B	2q14.1	0.712199	0.00534271	0.00945505	1
PMFBP1	16q22.2	-0.45699	0.00535522	0.00947537	1
AP4B1	1p13.2	-0.140428	0.00538373	0.00952124	1
CDC27	17q21.32	0.144167	0.00538991	0.00953035	1
U2AF1	21q22.3	-0.712459	0.00542222	0.00958303	1
PSRC1	1p13.3	0.281781	0.00543403	0.00959916	1
EPHX1	1q42.12	0.238235	0.00548499	0.00968453	1
ERF	19q13.2	0.236226	0.00548658	0.00968641	1
NBPF14	1q21.2	-0.217903	0.00548786	0.00968773	1
SMARCAL1	2q35	-0.104801	0.00560207	0.00987327	1
DLG5	10q22.3	0.33681	0.00579898	0.0101823	1
ZFX	Xp22.11	0.263017	0.00585698	0.0102744	1
NOP9	14q12	-0.128906	0.00608545	0.0106369	1
NPIPA1	16p13.11	-0.343422	0.00608736	0.010638	1
TMCO3	13q34	-0.252999	0.00610316	0.0106636	1
MYL12B	18p11.31	0.16498	0.0063462	0.0110589	1
LRRTM4	2p12	0.76575	0.00639162	0.0111317	1
PICK1	22q13.1	-0.245818	0.00653826	0.0113613	1
CAMK1	3p25.3	-0.290351	0.00663038	0.0115041	1
TATDN3	1q32.3	0.148843	0.00669913	0.0116124	1
CDYL	6p25.1	0.149164	0.00670638	0.0116239	1
NDUFS2	1q23.3	-0.141009	0.0069308	0.0119779	1
ASB8	12q13.11	0.10683	0.00698114	0.0120559	1
FAM126A	7p15.3	0.282131	0.00703088	0.0121316	1
SLC23A2	20p13	-0.218136	0.00703656	0.0121402	1
SLC25A28	10q24.2	0.179263	0.0070834	0.0122107	1
KIFAP3	1q24.2	0.157643	0.00714148	0.0122994	1
LAMP3	3q27.1	0.594685	0.00725493	0.0124831	1
COX10	17p12	0.129067	0.00730093	0.0125587	1
STK4	20q13.12	0.189575	0.00733796	0.0126165	1
NUP107	12q15	-0.130946	0.00740406	0.012723	1
ZFAND4	10q11.22	-0.218509	0.00766648	0.013147	1
SECTM1	17q25	0.50319	0.00781838	0.0133838	1
NANP	20p11.21	0.144122	0.00801998	0.013706	1
ACER3	11q13.5	-0.394993	0.00812099	0.0138632	1
AGO2	8q24.3	-0.241378	0.00855489	0.0145514	1
GIMAP8	7q36.1	0.344372	0.00856554	0.0145681	1
RAB4A	1q42.13	0.166927	0.00861526	0.0146486	1
ACSBG1	15q25.1	0.424537	0.00862155	0.014658	1
ZBTB24	6q21	-0.22014	0.00868285	0.014754	1
PIK3R2	19p13.11	-0.310834	0.00870585	0.0147849	1
ABTB2	11p13	0.352551	0.00886052	0.0150241	1
TRIL	7p14.3	0.369913	0.00904605	0.0153105	1
SCUBE2	11p15.4	0.742523	0.00916572	0.0154903	1
DHX40	17q23.1	0.123545	0.00917065	0.0154972	1
TYMS	18p11.32	-0.281229	0.00920222	0.0155406	1
CTAGE5	14q21.1	0.146361	0.00921066	0.0155505	1
KIAA1549	7q34	-0.336741	0.00930239	0.0156982	1
DUSP7	3p21.2	-0.167524	0.00941638	0.0158731	1
REG4	1p12	-0.854902	0.00946744	0.0159534	1
LRRC14	8q24.3	-0.191689	0.00948771	0.0159831	1
C12orf57	12p13.31	0.299414	0.00969547	0.0163063	1
GGN	19q13.2	-0.32625	0.00984724	0.016551	1
TSPAN9	12p13.33-p13.32	0.171048	0.0099504	0.0167036	1
ZSCAN32	16p13.3	-0.167469	0.0100712	0.0168889	1
TTC1	5q33.3	0.129482	0.0100897	0.0169138	1
STRA6	15q24.1	-0.504603	0.0101204	0.0169605	1
IGLV1-47	22q11.22	-0.962359	0.0103695	0.0173308	1
KRCC1	2p11.2	0.175853	0.0103766	0.0173395	1
JUN	1p32.1	0.410206	0.0104145	0.0173966	1
NPHP1	2q13	0.177329	0.0105185	0.0175607	1
WNK3	Xp11.22	-0.364921	0.0106533	0.0177632	1
IQUB	7q31.32	-0.341674	0.0107952	0.0179917	1
PROX1	1q32.3	0.576303	0.0108349	0.0180531	1
AAED1	9q22.33	-0.243405	0.0109672	0.0182652	1
THY1	11q23.3	-0.405388	0.010992	0.0183048	1
LONP2	16q12.1	-0.185874	0.0111466	0.0185305	1
GOSR1	17q11.2	-0.116261	0.0111959	0.018609	1
PLSCR1	3q24	0.349989	0.0112412	0.0186775	1
PROC	2q14.3	-0.767639	0.0115051	0.019085	1
BMI1	10p12.2	0.150396	0.0116644	0.0193304	1
SRSF7	2p22.1	-0.141096	0.0116841	0.0193558	1
IVD	15q15.1	-0.219329	0.0117571	0.0194662	1
CMTR2	16q22.2	0.211141	0.0118851	0.0196623	1
ZNF44	19p13.2	0.146668	0.0119634	0.0197759	1
IQGAP2	5q13.3	-0.331644	0.0120881	0.0199642	1
TLL2	10q24.1	-0.416863	0.0121139	0.0200032	1
MYBPC1	12q23.2	-0.759499	0.0121581	0.0200707	1
MED16	19p13.3	-0.178076	0.0121615	0.0200729	1
SPATA6L	9p24.2-p24.1	0.374754	0.0121817	0.0201043	1
METTL14	4q26	0.117022	0.012289	0.0202668	1
LYSMD3	5q14.3	0.230836	0.0123492	0.0203589	1
SH3BP2	4p16.3	-0.174889	0.0123582	0.0203718	1
PSME3	17q21.31	-0.141758	0.0123653	0.0203817	1
ANKRD12	18p11.22	0.182078	0.0125763	0.0206907	1
BTN3A1	6p22.2	0.245088	0.0125886	0.0207072	1
MFAP4	17p11.2	0.452784	0.0126055	0.0207313	1
SERPINB3	18q21.33	1.03251	0.0126716	0.0208362	1
XKR9	8q13.3	-0.571147	0.0127055	0.0208883	1
SS18	18q11.2	0.112908	0.0128121	0.0210391	1
SNX30	9q32	-0.213722	0.0128682	0.0211238	1
ARF4	3p14.3	-0.163375	0.0129153	0.0211973	1
WDR73	15q25.2	-0.139593	0.0131708	0.021582	1
SYCP2L	6p24.2	-0.693586	0.0133043	0.0217833	1
ASCC3	6q16.3	0.226731	0.0133904	0.0219127	1
RAB3A	19p13.11	-0.248974	0.0133919	0.0219131	1
NCF2	1q25.3	-0.358482	0.0135256	0.0221201	1
HSPA4	5q31.1	0.134199	0.0137525	0.0224574	1
APBB2	4p14-p13	0.1712	0.0139929	0.0228196	1
ERMARD	6q27	-0.138414	0.0141134	0.0229937	1
FAM135A	6q13	0.407791	0.0141915	0.0231037	1
GLE1	9q34.11	-0.133581	0.0142353	0.0231616	1
KCNK5	6p21.2	0.385676	0.0142633	0.023203	1
SLC4A8	12q13.13	0.371157	0.0143531	0.0233388	1
IGKV1-5	2p11.2	-0.912898	0.0143974	0.0234006	1
ZNF274	19q13.43	-0.167059	0.0145363	0.0235972	1
LRRFIP2	3p22.2	0.177926	0.0145807	0.023663	1
NTN5	19q13.33	-0.439987	0.0147033	0.0238452	1
SF3B1	2q33.1	-0.121244	0.0150781	0.0243951	1
UTP23	8q24.11	-0.166814	0.0154415	0.0249545	1
ALYREF	17q25.3	-0.166327	0.0155043	0.0250472	1
RANBP9	6p23	-0.147765	0.0155619	0.0251358	1
ZNF551	19q13.43	0.195287	0.0155968	0.0251856	1
SUOX	12q13.2	-0.17133	0.0156223	0.0252224	1
IDE	10q23.33	0.166066	0.015672	0.0252981	1
SNX19	11q24.3-q25	0.128291	0.0160256	0.0258259	1
HARS	5q31.3	0.11836	0.0161424	0.0259937	1
FZD5	2q33.3	-0.298114	0.0163036	0.0262258	1
CCR4	3p22.3	-0.608618	0.0163745	0.0263352	1
BCDIN3D	12q13.12	-0.131343	0.0167659	0.0269061	1
PPP1CA	11q13	-0.15309	0.0167833	0.0269292	1
BMPR2	2q33.1-q33.2	0.192388	0.0168553	0.0270283	1
SNAI1	20q13.13	0.391971	0.0169068	0.0271086	1
PFN1	17p13.2	0.156173	0.0169106	0.0271124	1
PHC2	1p35.1	0.113583	0.0170632	0.027338	1
PFKFB4	3p21.31	-0.255382	0.0170847	0.0273652	1
SFSWAP	12q24.33	-0.112406	0.0172121	0.0275526	1
ERAP2	5q15	0.672084	0.0173326	0.0277382	1
KHDRBS3	8q24.23	-0.50236	0.0174621	0.0279163	1
CARS	11p15.4	-0.126831	0.0175943	0.0280985	1
ADAMTS14	10q22.1	-0.470726	0.0176739	0.0282158	1
CNNM1	10q24.2	-0.36876	0.0177621	0.0283393	1
TTC4	1p32.3	0.105741	0.0181414	0.028892	1
EMILIN2	18p11.32-p11.31	-0.292492	0.0183806	0.0292528	1
SOGA1	20q11.23	-0.190408	0.0185435	0.0294968	1
DHRSX	Xp22.33 and Yp11.2	-0.157658	0.0185789	0.0295505	1
FAM83G	17p11.2	-0.317064	0.0187219	0.0297676	1
GCC2	2q12.3	-0.213855	0.0189161	0.0300505	1
NOB1	16q22.1	-0.182545	0.0190121	0.0301874	1
ZNF165	6p22.1	-0.198908	0.0190272	0.0302063	1
EI24	11q24.2	-0.119515	0.0192446	0.0305329	1
DPY19L2	12q14.2	-0.454749	0.019293	0.0305991	1
PIK3C2B	1q32.1	0.188787	0.0195349	0.0309562	1
RNASE6	14q11.2	0.307382	0.0196176	0.0310845	1
SGMS1	10q11.23	-0.187019	0.0197665	0.0312882	1
MCM4	8q11.21	-0.233637	0.0197981	0.0313328	1
SMOX	20p13	-0.330585	0.0198565	0.0314171	1
CA13	8q21.2	-0.407626	0.0200257	0.0316604	1
ELOVL4	6q14.1	0.451253	0.0201305	0.0318016	1
MID2	Xq22.3	0.206337	0.0205068	0.0323488	1
C16orf46	16q23.2	-0.203813	0.0205108	0.0323496	1
TACR1	2p12	0.421548	0.020803	0.0327516	1
NUPR1	16p11.2	-0.305889	0.0212896	0.0334548	1
C8orf82	8q24.3	-0.235033	0.0213319	0.0335156	1
PPP5C	19q13.32	-0.101132	0.0216999	0.0340357	1
RNF113A	Xq24	-0.153074	0.021917	0.0343587	1
STRN3	14q12	0.137492	0.022098	0.0346247	1
MUS81	11q13	-0.120649	0.0225082	0.0352017	1
HSPA14	10p13	-0.117815	0.0228792	0.0357516	1
UTP15	5q13.2	-0.130638	0.0229952	0.0359176	1
CD8A	2p11.2	0.40979	0.0231411	0.036121	1
ARHGEF10	8p23.3	0.179255	0.0232757	0.0363157	1
MAPKAPK2	1q32.1	0.137753	0.0234338	0.0365531	1
PHF20L1	8q24.22	-0.147781	0.0236478	0.036862	1
C3orf14	3p14.2	0.618382	0.0241421	0.0375847	1
CD200R1	3q13.2	0.439126	0.0244166	0.0379671	1
ZFPM1	16q24.2	-0.199057	0.0244237	0.037975	1
TPSAB1	16p13.3	0.471744	0.0245063	0.0380971	1
CACYBP	1q25.1	0.140846	0.0246248	0.0382651	1
UBQLN4	1q22	-0.114807	0.024755	0.0384577	1
PSMA6	14q13.2	-0.132794	0.0250612	0.0388973	1
LILRB2	19q13.4	-0.336125	0.0260489	0.0403081	1
RBM26	13q31.1	0.130739	0.0260773	0.0403453	1
ZNF665	19q13.42	0.146324	0.0263798	0.0407928	1
SEC14L1	17q25.2-q25.3	-0.182637	0.0265255	0.0409906	1
IGHA1	14q32.33	-0.805306	0.026605	0.0410961	1
IGLV3-25	22q11.22	-0.905187	0.0266136	0.0411025	1
ASXL2	2p23.3	0.192585	0.0268588	0.0414314	1
HINFP	11q23.3	-0.116528	0.026888	0.0414638	1
YAE1D1	7p14.1	-0.132238	0.0270834	0.0417232	1
ALOX12B	17p13.1	-0.484622	0.0275159	0.0423399	1
SPAG1	8q22.2	-0.260955	0.0277597	0.0426688	1
SAMD3	6q23.1	-0.393703	0.0281781	0.0432614	1
ZCCHC10	5q31.1	0.112082	0.0290233	0.0444442	1
TDRD5	1q25.2	0.582353	0.0291024	0.0445543	1
DGKZ	11p11.2	0.129266	0.0291253	0.0445819	1
IGSF6	16p12.2	-0.312838	0.0295282	0.0451424	1
SGSM2	17p13.3	-0.181969	0.0298843	0.0456245	1
NXF1	11q12.3	-0.139663	0.0301043	0.0459393	1
SRP19	5q22.2	-0.174336	0.0305064	0.0464873	1
UBE2D3	4q24	0.0775112	0.0308284	0.0469354	1
RBBP5	1q32.1	0.101946	0.0311962	0.047452	1
TANC2	17q23.2-q23.3	-0.211291	0.0316206	0.0480501	1
CENPJ	13q12.12-q12.13	0.149396	0.0316492	0.0480896	1
FLVCR2	14q24.3	0.235953	0.031714	0.0481802	1
IQCG	3q29	-0.182192	0.0320473	0.0486585	1
PALD1	10q22.1	0.282217	0.0327152	0.0496153	1

## Sheet: Common_653
Supplementary Table S2A – A comprehensive list of common 653 significantly differentially expressed somatic mutated genes in both Indolent and aggressive PCa matched with controls respectively.
Genes	Indolent			Aggressive			Somatic events
	logFC	p-value	adj. p-value	logFC	p-value	adj. p-value	Indolent	Aggressive
FAT4	0.797402	7.66e-05	0.000234937	1.20237	9.78e-10	4.8e-09	10	4
SPOP	0.368464	6.09e-13	9.64e-12	0.521754	7.8e-25	4.31e-23	9	29
AHNAK2	1.32575	1.63e-10	1.54e-09	1.78775	1.69e-18	2.92e-17	8	5
OBSCN	0.593302	0.00145373	0.00342138	0.665585	0.000222126	0.000500653	7	9
FAT3	1.46472	4.88e-09	3.39e-08	2.39106	6.31e-22	2.01e-20	5	9
KMT2D	-0.283768	0.00503239	0.0104145	-0.294233	0.00261293	0.00491238	5	7
PTEN	0.402268	0.000733071	0.00184022	0.669487	8.35e-09	3.62e-08	5	4
BRAF	-0.287902	6.6e-05	0.000204805	-0.361224	2.49e-07	8.72e-07	5	3
DNAH2	-0.543767	0.000580171	0.0014881	-0.654669	1.9e-05	5.06e-05	5	3
NAV2	1.28829	5.9e-13	9.38e-12	1.50257	7.38e-18	1.16e-16	5	2
KDM6A	-0.219502	0.0289418	0.0493468	-0.316215	0.00115542	0.00231386	5	2
HHAT	0.438906	0.00116365	0.00279433	0.885901	2.36e-11	1.46e-10	5	1
FBN2	0.642028	0.00342434	0.00740085	0.832369	8.97e-05	0.00021498	5	1
FBN1	0.438224	0.0074732	0.0147942	0.449408	0.00451975	0.00811239	5	1
SYNE1	0.452725	0.00277583	0.0061239	0.654123	8.46e-06	2.38e-05	4	7
DST	0.793354	5.87e-08	3.3e-07	0.99478	2.99e-12	2.09e-11	4	4
CHD6	-0.410782	8.65e-07	3.88e-06	-0.321129	6.39e-05	0.000156753	4	4
PKHD1L1	1.20556	1.4e-07	7.32e-07	1.23203	2.64e-08	1.06e-07	4	3
MALAT1	-0.436935	0.00554798	0.0113547	-0.641029	2.74e-05	7.14e-05	4	3
ASTN1	1.50445	7.24e-07	3.29e-06	2.12503	8.19e-13	6.18e-12	4	2
COL6A3	0.494311	0.0048277	0.0100457	0.679422	6.43e-05	0.000157725	4	2
DLEC1	0.434201	0.0104598	0.0199724	0.638738	0.000102484	0.000243404	4	2
VPS13B	-0.30016	0.00800678	0.0157352	-0.394239	0.000322242	0.000707191	4	2
ANK2	1.22707	2.42e-10	2.21e-09	1.54179	4e-16	4.78e-15	4	1
TENM3	0.906537	3.37e-06	1.36e-05	1.47592	1.38e-14	1.32e-13	4	1
FBN3	0.64706	0.00519486	0.0106962	0.917079	4.41e-05	0.000111069	4	1
ESYT1	0.208048	0.000291121	0.000792551	0.195448	0.000422601	0.000908928	4	1
LRP1B	1.35168	1.71e-07	8.8e-07	2.27403	6.03e-19	1.11e-17	3	10
CDH23	1.22903	1.34e-13	2.42e-12	1.53253	5.06e-21	1.35e-19	3	6
DCHS2	1.43166	2.35e-08	1.43e-07	2.23311	1.1e-18	1.97e-17	3	6
FILIP1	1.42015	1.19e-11	1.43e-10	1.64696	6.98e-16	8.08e-15	3	4
ZFPM2	1.19151	8.44e-08	4.61e-07	1.52597	1.97e-12	1.41e-11	3	4
ZNF536	1.25482	7.29e-07	3.31e-06	1.89331	2.54e-14	2.37e-13	3	3
UTRN	-0.639097	1.61e-08	1.01e-07	-0.492389	5.88e-06	1.69e-05	3	3
PHLDB1	0.495171	3.89e-05	0.000127405	0.434254	0.000183258	0.000419148	3	3
ITPR2	-0.731873	6.88e-08	3.82e-07	-0.40361	0.00188331	0.00363257	3	3
DNAH5	-2.71423	1.71e-31	1.15e-28	-2.39344	5.07e-27	4.17e-25	3	2
TSHZ3	0.854337	9.87e-11	9.83e-10	1.10011	1.84e-17	2.71e-16	3	2
VAV3	1.39036	1.21e-15	3.43e-14	1.30845	5.71e-15	5.8e-14	3	2
ZC3H13	0.299214	0.000448532	0.00117726	0.554692	3.16e-11	1.91e-10	3	2
TG	1.39184	4.46e-06	1.76e-05	1.52972	1.92e-07	6.83e-07	3	2
LTBP3	0.422937	4.16e-05	0.000135488	0.399971	5.96e-05	0.000147019	3	2
LAMB1	0.68473	5.82e-06	2.24e-05	0.515745	0.000387694	0.00083904	3	2
ABCA4	0.947934	2.78e-06	1.14e-05	0.685322	0.000425413	0.000914228	3	2
COL12A1	-0.615957	0.00724186	0.0143807	-0.525817	0.017522	0.0279927	3	2
PIKFYVE	-0.288218	0.00563863	0.0115211	-0.216838	0.0308187	0.0469245	3	2
NKX3-1	-1.47245	6.2e-20	4.25e-18	-1.36338	1.5e-18	2.63e-17	3	1
F5	-1.44275	8.36e-06	3.12e-05	-2.19084	4.65e-12	3.16e-11	3	1
KMT2B	-0.226472	0.000130238	0.000382353	-0.313372	5.21e-08	2.01e-07	3	1
MMP16	0.817887	4.49e-05	0.000144985	0.981043	4.46e-07	1.51e-06	3	1
OPA1	0.276017	1.83e-06	7.72e-06	0.262774	2.53e-06	7.71e-06	3	1
BBS4	-0.784504	8.42e-09	5.59e-08	-0.567718	1.39e-05	3.81e-05	3	1
THSD7B	0.782242	0.00128313	0.00305734	1.02023	1.48e-05	4.03e-05	3	1
KCNT2	0.909148	0.000143729	0.000418031	0.990365	1.86e-05	4.97e-05	3	1
DMXL2	-0.334071	0.000410332	0.00108581	-0.365662	6.38e-05	0.000156615	3	1
NOTCH4	0.553612	4.2e-06	1.66e-05	0.426161	0.000232754	0.000522244	3	1
LAMA2	0.512681	0.00414015	0.0087685	0.556121	0.00129342	0.00256568	3	1
DNAH11	0.834875	0.000164012	0.0004724	0.682214	0.00139913	0.00275992	3	1
CHAMP1	-0.376957	1.54e-05	5.47e-05	-0.24678	0.00324046	0.00598589	3	1
ADAMTS3	-0.533072	0.00196678	0.00449844	-0.462112	0.00542335	0.00958303	3	1
PCDH18	0.620378	0.000434201	0.00114257	1.06695	5.98e-10	3.03e-09	2	7
FAT2	1.80337	2.8e-11	3.1e-10	2.24603	2.34e-17	3.39e-16	2	6
HFM1	0.569543	0.0199825	0.0356336	0.668612	0.00472855	0.00845259	2	6
PIK3CA	0.195199	0.0226375	0.0397716	0.178764	0.030606	0.0466314	2	6
DNAH8	-1.66762	5.96e-07	2.76e-06	-2.60538	2.1e-15	2.26e-14	2	4
GRIN2A	1.22567	5.06e-06	1.97e-05	1.8928	6.4e-13	4.89e-12	2	4
APOB	1.29908	3.18e-06	1.29e-05	1.74075	1.49e-10	8.21e-10	2	4
DHTKD1	-0.697045	2.72e-14	5.78e-13	-0.53035	1.4e-09	6.72e-09	2	3
DNAJC13	0.309411	9.61e-06	3.55e-05	0.269565	6.35e-05	0.000156019	2	3
BCL6	0.274535	0.018383	0.033108	0.387893	0.00058249	0.00122466	2	3
TRRAP	-0.258551	0.00233807	0.00524671	-0.257242	0.00171985	0.00333931	2	3
ANK3	-0.354499	0.007318	0.0145178	-0.306593	0.0162416	0.026142	2	3
MYLK	1.58097	3.31e-13	5.54e-12	2.2946	1.99e-26	1.47e-24	2	2
ASPM	-1.15227	1.03e-08	6.69e-08	-1.96446	9.94e-23	3.64e-21	2	2
HELQ	0.277963	1.1e-09	8.69e-09	0.366684	2.24e-16	2.78e-15	2	2
ANO4	0.858613	0.000165423	0.000476093	1.81072	9.34e-16	1.06e-14	2	2
ROBO1	0.952638	2.14e-09	1.6e-08	1.21512	5.49e-15	5.59e-14	2	2
HECTD4	-0.66714	9.07e-12	1.11e-10	-0.690463	3.17e-13	2.52e-12	2	2
CDCA2	-0.653192	0.000234283	0.000652367	-1.21047	3.74e-12	2.56e-11	2	2
MET	1.11337	1.64e-09	1.25e-08	1.22631	7.68e-12	5.05e-11	2	2
CFH	0.934069	8.31e-08	4.55e-07	1.08835	1.28e-10	7.12e-10	2	2
SKIV2L	-0.329331	1.7e-10	1.6e-09	-0.308928	5.31e-10	2.71e-09	2	2
DPYD	0.795107	1.03e-06	4.57e-06	0.957009	1.43e-09	6.86e-09	2	2
SLC12A5	-0.754009	0.000299977	0.000815455	-1.20275	3.39e-09	1.55e-08	2	2
CMYA5	0.610007	0.00081767	0.00202827	0.977964	3.65e-08	1.44e-07	2	2
DDX50	0.222939	6.06e-08	3.4e-07	0.21546	5.93e-08	2.27e-07	2	2
COL27A1	0.764802	9.19e-05	0.000277536	0.968253	3.37e-07	1.16e-06	2	2
PCDHB2	-1.18255	1.7e-05	5.99e-05	-1.29359	1.17e-06	3.75e-06	2	2
ZCCHC14	0.200054	0.00475794	0.00991511	0.294504	1.85e-05	4.93e-05	2	2
RYR1	0.663494	0.00183322	0.00421387	0.873231	2.33e-05	6.13e-05	2	2
AKAP9	-0.301597	0.00176484	0.00407244	-0.39312	2.61e-05	6.81e-05	2	2
EIF2AK3	-0.403682	7.17e-07	3.27e-06	-0.327275	2.98e-05	7.72e-05	2	2
RELN	-0.662306	0.00826701	0.0161965	-0.957477	8.22e-05	0.000198331	2	2
DGKI	0.749788	7.6e-06	2.86e-05	0.629247	9.68e-05	0.000230939	2	2
DNER	1.10506	2.95e-05	9.94e-05	0.972783	0.000137267	0.000320116	2	2
HEATR5B	-0.369942	3.93e-06	1.56e-05	-0.282252	0.000252758	0.000563356	2	2
NCKAP5	-1.26023	3e-12	4.06e-11	-0.627031	0.000258035	0.000574632	2	2
ZNF616	-0.260307	6.82e-05	0.000211184	-0.229481	0.000272712	0.00060505	2	2
MBD6	-0.14774	0.0142654	0.0263579	-0.206624	0.000402883	0.000869766	2	2
SMCR8	-0.357228	3.16e-05	0.000106036	-0.281602	0.000660003	0.00137492	2	2
FAM171A1	-0.543047	5.79e-08	3.26e-07	-0.306554	0.00137728	0.00272001	2	2
XPR1	0.191845	0.00643789	0.0129531	0.217595	0.00139423	0.00275114	2	2
FAT1	-0.465702	0.000716875	0.00180349	-0.420751	0.00154016	0.00301904	2	2
HSPG2	0.459752	0.00730426	0.0144921	0.506915	0.00221526	0.00421941	2	2
PAPLN	0.347439	0.0202698	0.0360802	0.421064	0.00362666	0.00663939	2	2
AFG3L2	-0.123955	0.0289025	0.0492933	-0.13702	0.0124506	0.0205077	2	2
NUP210	-1.29316	7.18e-31	3.78e-28	-1.35396	2.52e-35	1.29e-32	2	1
TRPM4	-1.65015	1.09e-25	2.39e-23	-1.64351	4.59e-27	3.85e-25	2	1
OTX1	-2.96977	7.46e-27	2.02e-24	-2.80126	8.38e-26	5.46e-24	2	1
TBC1D1	0.941241	4.2e-16	1.33e-14	1.05304	1.06e-20	2.69e-19	2	1
C14orf159	0.842984	3.77e-09	2.68e-08	1.29349	5.57e-20	1.22e-18	2	1
RBFOX1	1.46356	1.14e-06	5e-06	2.7127	1.04e-19	2.18e-18	2	1
SLC16A4	0.984716	1.4e-13	2.52e-12	1.13527	2.33e-18	3.95e-17	2	1
FLNC	1.24552	3.13e-07	1.53e-06	2.07803	5.62e-18	9.02e-17	2	1
TRPM3	1.5656	1.21e-12	1.8e-11	1.8182	2.7e-17	3.87e-16	2	1
FER	0.612234	2.34e-10	2.15e-09	0.783406	1.17e-16	1.52e-15	2	1
PCSK2	1.73517	4.06e-08	2.36e-07	2.48836	1.05e-15	1.18e-14	2	1
ZFP36L1	0.91121	1.07e-12	1.6e-11	0.989768	1.69e-15	1.84e-14	2	1
CES1	1.23091	8.03e-08	4.4e-07	1.75073	6.84e-15	6.84e-14	2	1
CCDC180	-0.825616	6.12e-07	2.82e-06	-1.20267	1.19e-13	1.01e-12	2	1
ERBB3	-0.872577	1.34e-16	4.72e-15	-0.749372	1.35e-13	1.13e-12	2	1
ADRB2	-0.998181	1.09e-12	1.62e-11	-0.978714	5.09e-13	3.95e-12	2	1
XPO5	-0.369781	8.35e-12	1.03e-10	-0.378229	5.27e-13	4.08e-12	2	1
PLCB1	0.524986	5.16e-07	2.41e-06	0.729981	9.18e-13	6.88e-12	2	1
UBAP2	-0.409614	3.69e-11	3.98e-10	-0.426136	1.2e-12	8.87e-12	2	1
ITGAX	-0.667309	1.06e-05	3.89e-05	-1.02654	4.4e-12	3e-11	2	1
DNA2	-0.432277	0.000268811	0.00073836	-0.804519	4.82e-12	3.27e-11	2	1
ZNF285	-0.494898	2.9e-10	2.6e-09	-0.524222	5.59e-12	3.75e-11	2	1
IQGAP1	0.435065	1.41e-08	8.93e-08	0.513827	5.64e-12	3.79e-11	2	1
FLRT3	1.52381	4.02e-08	2.34e-07	1.84971	7.54e-12	4.97e-11	2	1
LSR	-0.523537	2.6e-10	2.36e-09	-0.505321	2.66e-10	1.41e-09	2	1
KLK3	-1.7444	9.22e-16	2.7e-14	-1.30381	3.11e-10	1.64e-09	2	1
GTF3C1	-0.617464	6.26e-15	1.52e-13	-0.473917	3.83e-10	2e-09	2	1
PRG4	-0.533834	0.00582998	0.011866	-1.18367	4.39e-10	2.27e-09	2	1
GOLGA2	-0.295577	9.22e-06	3.42e-05	-0.399888	7.25e-10	3.63e-09	2	1
ZEB2	0.822062	4.75e-07	2.24e-06	0.975944	7.5e-10	3.75e-09	2	1
POU2F2	0.685308	9.19e-07	4.1e-06	0.833513	8.11e-10	4.03e-09	2	1
SLITRK3	1.37404	0.000109969	0.000327014	2.07295	2.18e-09	1.02e-08	2	1
KNDC1	0.980744	5.49e-06	2.13e-05	1.24293	3.13e-09	1.43e-08	2	1
PCDHB8	-1.47816	2.92e-05	9.83e-05	-2.01421	4.85e-09	2.16e-08	2	1
SPTBN1	0.456692	4.91e-06	1.92e-05	0.564462	6.17e-09	2.72e-08	2	1
GRID1	0.825005	1.88e-06	7.94e-06	0.962066	1.02e-08	4.35e-08	2	1
LYST	0.388127	3.72e-05	0.000122322	0.522126	1.17e-08	4.95e-08	2	1
ADAMTS2	-0.404352	0.0270083	0.0464801	-1.01242	1.5e-08	6.22e-08	2	1
CYP27B1	-0.611274	3.48e-05	0.000115406	-0.807868	1.83e-08	7.52e-08	2	1
XPO7	0.226628	0.000206219	0.000580804	0.330295	2.75e-08	1.1e-07	2	1
DAPK1	-0.731595	1.61e-06	6.85e-06	-0.815906	3.37e-08	1.34e-07	2	1
TTC13	-0.229598	0.000804766	0.00199895	-0.368531	3.38e-08	1.34e-07	2	1
PLCH2	0.678379	0.000139919	0.000407851	0.933693	7e-08	2.66e-07	2	1
CACNB1	0.970984	2.64e-11	2.94e-10	0.719574	2.51e-07	8.79e-07	2	1
LRRC7	-0.952996	0.000177903	0.000507885	-1.25876	3.42e-07	1.18e-06	2	1
EPN2	0.24516	1.36e-05	4.89e-05	0.278245	3.49e-07	1.2e-06	2	1
TTC31	-0.230146	5.76e-07	2.67e-06	-0.226336	3.6e-07	1.23e-06	2	1
ADAMTS9	0.368062	0.0180944	0.0326297	0.752048	7.14e-07	2.35e-06	2	1
VCP	-0.258801	6.23e-06	2.38e-05	-0.27053	1.04e-06	3.36e-06	2	1
CATSPERG	-0.417734	6.36e-07	2.92e-06	-0.394359	1.11e-06	3.57e-06	2	1
CASZ1	-0.376269	8.26e-06	3.08e-05	-0.392893	1.48e-06	4.67e-06	2	1
ZNF142	-0.260815	3.94e-06	1.57e-05	-0.251178	4.19e-06	1.23e-05	2	1
NSFL1C	0.15287	0.000317731	0.000860924	0.187635	5.13e-06	1.49e-05	2	1
TNC	0.422972	0.017506	0.0316865	0.782927	6.1e-06	1.75e-05	2	1
TCERG1	-0.15069	0.01953	0.0349349	-0.276322	1.05e-05	2.93e-05	2	1
HMGCS1	0.509272	1.36e-05	4.88e-05	0.496137	1.14e-05	3.17e-05	2	1
PTGFRN	0.237512	0.00173384	0.00400926	0.320087	1.34e-05	3.68e-05	2	1
SIN3B	0.26266	3.73e-06	1.49e-05	0.237933	1.4e-05	3.82e-05	2	1
ZNF181	-0.162221	0.00901212	0.0174816	-0.257396	1.97e-05	5.24e-05	2	1
FAM155A	0.828419	0.000655643	0.00166284	0.954392	4.99e-05	0.000124699	2	1
SHROOM3	-0.413246	5.02e-05	0.000160314	-0.383399	9.72e-05	0.00023181	2	1
LRP2	0.71176	0.00489468	0.0101667	0.951976	0.000102643	0.00024375	2	1
ANKRD13A	0.386182	3.7e-08	2.17e-07	0.26053	0.000107717	0.000255076	2	1
ZFYVE26	0.193075	0.00305774	0.00668423	0.238042	0.000162085	0.000374111	2	1
RNF8	0.234636	1.53e-08	9.62e-08	0.149681	0.000164201	0.000378568	2	1
JAG2	0.599739	2.91e-07	1.43e-06	0.417426	0.000200949	0.000456777	2	1
GOLGA4	-0.269269	0.00142366	0.00335753	-0.295046	0.000301075	0.000663662	2	1
SGCD	0.686588	0.00177677	0.00409689	0.765485	0.000315008	0.000692139	2	1
DKK1	1.39047	1.05e-05	3.86e-05	1.06109	0.000476822	0.00101629	2	1
ARHGAP5	0.214454	0.00754813	0.0149294	0.266213	0.000610616	0.00127927	2	1
LTBP1	0.394138	0.00781108	0.0153982	0.487059	0.000681459	0.00141689	2	1
TMC7	-0.347769	0.00131052	0.00311496	-0.350755	0.00079414	0.00163185	2	1
MLH3	0.123079	0.00780744	0.0153927	0.149447	0.000842069	0.00172399	2	1
USP28	0.208205	0.00677717	0.0135529	0.229469	0.00202256	0.00388005	2	1
MDC1	0.232273	0.00019298	0.000546357	0.183507	0.00224126	0.00426408	2	1
SF1	-0.156613	0.000165809	0.000477053	-0.121547	0.00241712	0.00456567	2	1
RBL1	0.413863	4.78e-07	2.25e-06	0.226536	0.00402391	0.00728772	2	1
SLC4A7	-0.412626	3.01e-05	0.000101244	-0.271195	0.00434667	0.00782613	2	1
MYH10	-0.278951	0.00130083	0.00309431	-0.23313	0.0053327	0.00943915	2	1
AUTS2	0.380388	0.00267443	0.00592077	0.338444	0.00563527	0.00992609	2	1
CLSTN3	-0.229016	0.0264897	0.0456986	-0.275675	0.00573827	0.010095	2	1
RANBP6	0.132805	0.0242405	0.0422375	0.157372	0.00575124	0.0101105	2	1
HAPLN1	1.20879	0.00215118	0.00487658	1.02638	0.00692195	0.0119649	2	1
FOXA1	-1.78195	7.05e-31	3.78e-28	-1.78545	7.68e-33	2.24e-30	1	12
FAM83B	1.93397	4e-09	2.83e-08	2.76547	1.16e-17	1.77e-16	1	6
MXRA5	0.606097	0.000317647	0.000860824	0.721676	9.62e-06	2.69e-05	1	5
SPEG	1.19114	5.48e-10	4.62e-09	1.60332	1.71e-17	2.54e-16	1	4
DOCK3	1.34893	9.53e-16	2.78e-14	1.38482	1.77e-17	2.62e-16	1	4
ARHGAP32	-0.824541	2.42e-15	6.42e-14	-0.824339	2.83e-16	3.46e-15	1	4
IFI16	0.80083	5.12e-08	2.92e-07	0.823304	7.11e-09	3.11e-08	1	4
TLK1	-0.325071	3.61e-05	0.000119163	-0.356767	2.81e-06	8.5e-06	1	4
SALL1	0.923472	0.000982341	0.00239325	1.10267	4.82e-05	0.000120646	1	4
MTOR	-0.551448	1.53e-09	1.18e-08	-0.342893	8.59e-05	0.000206602	1	4
HSPA8	-0.319287	0.000815736	0.00202456	-0.316063	0.000602955	0.00126465	1	4
ZNF521	0.503354	0.00150469	0.00353183	0.510015	0.000873671	0.00178354	1	4
MKI67	-1.6758	1.79e-19	1.14e-17	-2.34579	1.89e-36	1.03e-33	1	3
ITSN1	0.663416	2.86e-16	9.42e-15	0.747907	3.45e-21	9.54e-20	1	3
DOT1L	-0.561205	1.29e-12	1.91e-11	-0.714164	3.58e-20	8.08e-19	1	3
COL17A1	2.14686	1.57e-10	1.49e-09	2.73023	9.1e-17	1.2e-15	1	3
SIPA1L3	-0.726756	6.33e-17	2.38e-15	-0.623416	7.81e-14	6.79e-13	1	3
DIP2A	-0.703224	4.06e-13	6.69e-12	-0.622794	2.44e-11	1.5e-10	1	3
SCN7A	0.633577	0.00606313	0.0122917	1.4388	2.07e-10	1.11e-09	1	3
SEL1L3	-0.989082	4.24e-15	1.07e-13	-0.702528	5.04e-09	2.24e-08	1	3
ABHD8	0.486841	1.91e-07	9.77e-07	0.432916	1.56e-06	4.87e-06	1	3
EGFR	0.353423	0.000439456	0.00115492	0.466335	1.76e-06	5.46e-06	1	3
WDR7	0.271218	0.00138514	0.00327627	0.328167	6.45e-05	0.000158012	1	3
F8	0.238474	0.0173725	0.0314695	0.378449	9.95e-05	0.000236777	1	3
TRIO	-0.277161	0.00158457	0.00369906	-0.281422	0.0009018	0.00183689	1	3
FREM1	0.656195	0.000392757	0.0010438	0.569409	0.00142899	0.0028146	1	3
HELB	-0.535743	3.44e-08	2.03e-07	-0.293093	0.00160433	0.00313384	1	3
DOCK7	-0.194716	0.026872	0.0462709	-0.226157	0.00782966	0.0134007	1	3
AOX1	2.03945	3.87e-19	2.28e-17	2.76932	4.45e-34	1.82e-31	1	2
SEMA6D	1.62935	3.22e-17	1.29e-15	2.01197	3.53e-26	2.5e-24	1	2
MPP2	1.37171	1.69e-13	2.98e-12	1.91827	2.32e-25	1.41e-23	1	2
KIFC1	-0.886351	1.19e-08	7.62e-08	-1.61164	3.58e-25	2.1e-23	1	2
CLCNKB	1.88441	8.71e-19	4.83e-17	2.01197	2.69e-22	9.15e-21	1	2
DGKD	-0.752749	3.11e-16	1.01e-14	-0.853996	2.27e-21	6.45e-20	1	2
CLCA2	3.12889	1.82e-14	3.99e-13	3.78658	2.95e-21	8.27e-20	1	2
MAP1A	1.17307	6.31e-11	6.54e-10	1.65867	7.24e-21	1.89e-19	1	2
MAPRE1	0.362768	4.15e-14	8.44e-13	0.428853	6.47e-20	1.4e-18	1	2
DUOX2	2.53346	4.07e-15	1.04e-13	2.7836	7.73e-19	1.41e-17	1	2
NNT	0.648176	4.97e-10	4.24e-09	0.892381	2.92e-18	4.89e-17	1	2
DMD	1.28167	3.02e-11	3.33e-10	1.61148	1.38e-17	2.07e-16	1	2
CTTNBP2	1.14759	9.86e-12	1.2e-10	1.39826	2.11e-17	3.08e-16	1	2
CIT	-0.542476	5.05e-05	0.000161125	-1.11776	3.43e-17	4.84e-16	1	2
CELSR2	0.719904	2.41e-10	2.21e-09	0.920981	1.25e-16	1.61e-15	1	2
P4HA2	0.688953	1.5e-11	1.75e-10	0.794364	1.37e-15	1.51e-14	1	2
EIF4G1	-0.450619	3.01e-12	4.07e-11	-0.493987	3.52e-15	3.66e-14	1	2
ARHGEF19	1.1601	8.86e-13	1.35e-11	1.23898	3.71e-15	3.85e-14	1	2
AHDC1	0.597748	1.92e-11	2.19e-10	0.651874	4.77e-14	4.27e-13	1	2
REC8	1.14548	3.4e-14	7.05e-13	1.09727	5.31e-14	4.73e-13	1	2
PLXNA2	0.715733	3.77e-10	3.3e-09	0.820021	1.6e-13	1.33e-12	1	2
EVPL	-0.496662	1.68e-09	1.28e-08	-0.587498	2.45e-13	1.98e-12	1	2
WSB2	-0.480685	1.57e-08	9.88e-08	-0.604545	3.1e-13	2.47e-12	1	2
GPR87	2.3536	2.54e-10	2.31e-09	2.61967	4.26e-13	3.34e-12	1	2
PRRC2A	-0.464688	2.34e-14	5.03e-13	-0.422286	5.95e-13	4.57e-12	1	2
ADGRG6	1.64781	4.63e-13	7.53e-12	1.58209	6.22e-13	4.77e-12	1	2
PRDM15	-0.296595	2.13e-08	1.31e-07	-0.370462	7.15e-13	5.44e-12	1	2
SLC25A27	-0.969327	1.6e-08	1e-07	-1.18814	1.16e-12	8.56e-12	1	2
KDM4B	-0.587893	5.8e-16	1.77e-14	-0.493499	1.39e-12	1.01e-11	1	2
SDK1	-1.82301	6.92e-15	1.66e-13	-1.58043	2.12e-12	1.51e-11	1	2
CAD	-0.337612	4.83e-07	2.28e-06	-0.458394	2.58e-12	1.82e-11	1	2
SSH3	0.597566	2.04e-14	4.44e-13	0.521581	3.77e-12	2.59e-11	1	2
MTUS1	0.264412	0.00164095	0.00381858	0.562009	9.52e-12	6.18e-11	1	2
PNPLA7	-0.957133	1.39e-14	3.12e-13	-0.808502	1.24e-11	7.94e-11	1	2
BCL11A	1.32652	8.94e-08	4.87e-07	1.63017	1.47e-11	9.29e-11	1	2
MAP7D3	0.72152	1.1e-08	7.09e-08	0.820703	2.18e-11	1.35e-10	1	2
CHD9	0.469459	3.89e-07	1.87e-06	0.597932	3.23e-11	1.95e-10	1	2
POLG2	-0.282265	0.000186142	0.000528704	-0.465328	2.9e-10	1.53e-09	1	2
ILDR2	0.856375	3.38e-07	1.64e-06	1.00861	6.17e-10	3.13e-09	1	2
KIAA0319L	-0.713943	5.04e-18	2.37e-16	-0.484192	6.37e-10	3.22e-09	1	2
DNAH1	-0.577977	6.76e-07	3.09e-06	-0.663739	4.08e-09	1.84e-08	1	2
FES	0.702851	3.18e-08	1.88e-07	0.720941	4.5e-09	2.02e-08	1	2
POLE	-0.27362	6.21e-06	2.38e-05	-0.331747	1.67e-08	6.89e-08	1	2
FILIP1L	0.858756	1.51e-05	5.38e-05	1.06705	3.08e-08	1.23e-07	1	2
HIST2H2BF	-0.914019	3.16e-05	0.000105828	-1.17977	3.23e-08	1.28e-07	1	2
HIPK3	0.290045	4.59e-05	0.000147848	0.373237	6.69e-08	2.55e-07	1	2
LRRC49	0.39519	1.62e-07	8.38e-07	0.393618	6.71e-08	2.56e-07	1	2
MYO1D	-0.470744	7.47e-10	6.12e-09	-0.389376	1.18e-07	4.33e-07	1	2
TRPS1	0.579483	1.34e-06	5.79e-06	0.61051	1.42e-07	5.15e-07	1	2
ATP10D	0.499704	3.65e-05	0.000120382	0.617268	1.48e-07	5.36e-07	1	2
PER3	0.620352	1.88e-06	7.93e-06	0.659685	1.64e-07	5.88e-07	1	2
ACAD10	-0.336711	8.43e-07	3.79e-06	-0.340674	2.54e-07	8.92e-07	1	2
L3HYPDH	-0.295921	0.00680423	0.0135996	-0.533615	5.39e-07	1.81e-06	1	2
KANSL1L	0.385794	7.82e-06	2.93e-05	0.417491	5.81e-07	1.94e-06	1	2
MYO15A	0.576828	3.84e-06	1.53e-05	0.5928	9.12e-07	2.96e-06	1	2
TIAM2	0.364383	2.26e-08	1.38e-07	0.302306	1.43e-06	4.51e-06	1	2
LMTK2	-0.408915	4.5e-07	2.13e-06	-0.37434	1.67e-06	5.21e-06	1	2
GPI	-0.290516	4.08e-05	0.000133027	-0.328374	1.68e-06	5.23e-06	1	2
MPDZ	0.264928	0.00349211	0.00753455	0.402561	4.89e-06	1.43e-05	1	2
MBD1	0.165341	0.000321963	0.000871238	0.202885	5.27e-06	1.53e-05	1	2
TCF7L2	0.20782	0.00407269	0.0086445	0.309278	1.06e-05	2.96e-05	1	2
RAB37	0.472257	0.000935052	0.00228955	0.596312	1.62e-05	4.37e-05	1	2
KIAA2026	0.227063	0.00265533	0.00588641	0.30916	2.45e-05	6.42e-05	1	2
PTPN9	0.142824	0.00291107	0.00639318	0.195598	2.62e-05	6.83e-05	1	2
PRMT3	-0.234643	0.000391479	0.00104101	-0.267609	2.94e-05	7.61e-05	1	2
ETV3	0.277238	0.000857537	0.00211747	0.332202	3.71e-05	9.44e-05	1	2
NTNG2	0.944372	1.18e-05	4.28e-05	0.854408	3.97e-05	0.000100682	1	2
ZFAT	-0.157566	0.00891711	0.0173229	-0.239524	4.17e-05	0.000105289	1	2
CACNA1A	0.669305	3.63e-05	0.000119671	0.635356	4.89e-05	0.00012222	1	2
ZNF131	-0.171967	0.00182147	0.00418999	-0.215506	5.49e-05	0.000136387	1	2
PDE8A	0.172699	0.00309634	0.00675899	0.22806	5.56e-05	0.000137862	1	2
PLEKHS1	-0.793618	0.000259153	0.000714647	-0.845146	5.75e-05	0.000142123	1	2
PLK3	0.630894	1.92e-05	6.69e-05	0.557504	8.98e-05	0.000215227	1	2
IRF8	1.01078	1.23e-07	6.54e-07	0.69652	0.000146179	0.000339824	1	2
CLCN3	-0.391596	1.16e-05	4.24e-05	-0.319402	0.000205507	0.000466159	1	2
RANBP2	-0.416136	1.48e-06	6.35e-06	-0.30718	0.000219468	0.00049528	1	2
CCSER1	-0.352989	0.00157179	0.00367296	-0.399195	0.000219473	0.00049528	1	2
TYW1	-0.148193	0.0027666	0.00610501	-0.174088	0.000280038	0.00062038	1	2
LIMCH1	0.331597	0.000576973	0.00148084	0.334511	0.000325759	0.000714059	1	2
SLC38A11	-1.28101	6.71e-06	2.55e-05	-0.976928	0.000359746	0.000782599	1	2
AKT1	-0.155827	0.00371169	0.00795152	-0.184938	0.00037226	0.00080782	1	2
DISP1	0.255877	0.0104552	0.0199678	0.344397	0.000373069	0.000809481	1	2
PRMT5	-0.254364	0.000107539	0.000320409	-0.223696	0.00041409	0.000891588	1	2
FUT8	0.346951	6.55e-05	0.000203594	0.293575	0.000459028	0.000980294	1	2
DEPDC5	0.135799	0.00566421	0.0115593	0.164766	0.000522708	0.00110743	1	2
ATP8B4	0.708652	0.00355837	0.00766674	0.812531	0.000549763	0.00116022	1	2
FN1	0.880664	6.9e-06	2.61e-05	0.648481	0.000577516	0.00121572	1	2
ANKHD1	-0.161369	0.0199919	0.0356468	-0.228102	0.000684445	0.00142278	1	2
MYLIP	-0.164009	0.0272513	0.0468021	-0.241827	0.000776447	0.00159924	1	2
MTMR3	-0.286358	8.54e-06	3.18e-05	-0.204621	0.000942877	0.00191397	1	2
UBQLNL	0.482191	0.00795767	0.0156554	0.564909	0.00130639	0.00259002	1	2
SLTM	-0.107575	0.00460271	0.00963215	-0.112482	0.00216901	0.00413645	1	2
ISLR	0.446689	0.00454759	0.00953065	0.448684	0.00317403	0.00587259	1	2
LRFN3	-0.154322	0.0211959	0.0374674	-0.176946	0.00626937	0.0109354	1	2
ENPP2	0.381464	0.0153315	0.0281095	0.41382	0.0064986	0.011302	1	2
USP30	0.133559	0.00861032	0.0167852	0.112019	0.0224065	0.0350664	1	2
DSP	-0.332713	0.000449576	0.00117933	-0.196878	0.0309484	0.0471026	1	2
TRIM36	-1.76168	5.02e-34	5.13e-31	-1.84352	7.43e-39	6.37e-36	1	1
HOXC4	-2.74989	1.77e-25	3.58e-23	-3.387	2.75e-38	2.11e-35	1	1
SLC2A9	1.71069	6.91e-27	1.93e-24	2.00073	4.82e-37	3.06e-34	1	1
PCSK6	-1.98796	1.42e-32	1.05e-29	-1.92259	1.19e-32	3.32e-30	1	1
BUB1B	-1.30201	8.24e-16	2.44e-14	-1.86609	6.2e-31	1.14e-28	1	1
SLC12A8	-1.12246	1.55e-25	3.22e-23	-1.18537	1.06e-29	1.51e-27	1	1
IGSF1	1.89015	4.36e-10	3.77e-09	3.42853	2.36e-29	3e-27	1	1
GOLM1	-2.35928	1.78e-36	2.98e-33	-1.97568	9.58e-29	1.06e-26	1	1
MAMLD1	1.29405	3.52e-14	7.27e-13	1.85013	1.17e-27	1.09e-25	1	1
UBXN10	1.64242	1.76e-12	2.52e-11	2.46906	1.68e-26	1.25e-24	1	1
KIF20A	-1.23361	4.99e-10	4.25e-09	-2.11305	1.72e-26	1.28e-24	1	1
EPM2A	0.70751	2.03e-15	5.49e-14	0.918768	1.51e-25	9.49e-24	1	1
RANBP17	-0.636326	6.79e-14	1.32e-12	-0.865164	6.86e-25	3.85e-23	1	1
ANXA6	1.14614	2.93e-16	9.62e-15	1.41243	1.22e-24	6.5e-23	1	1
ABCC4	-2.24909	4.29e-29	1.68e-26	-1.96581	1.42e-24	7.39e-23	1	1
ZIC5	-3.762	1.55e-14	3.47e-13	-4.88336	4.55e-24	2.13e-22	1	1
KIF14	-1.15886	2.9e-08	1.74e-07	-2.08554	1.42e-23	6.07e-22	1	1
HOXB13	-1.75859	3.39e-22	3.95e-20	-1.75615	1.69e-23	7.14e-22	1	1
SNAPC1	0.623869	4.96e-25	9.14e-23	0.579437	2.01e-23	8.34e-22	1	1
TP53INP1	-1.12815	1.6e-20	1.28e-18	-1.17597	2.24e-23	9.18e-22	1	1
CDC42EP3	0.893714	1.29e-12	1.91e-11	1.23786	2.6e-23	1.05e-21	1	1
ASPN	-1.14605	3.63e-08	2.14e-07	-2.03467	9.46e-23	3.48e-21	1	1
STAC	1.90058	4.7e-11	4.95e-10	2.80681	9.65e-23	3.54e-21	1	1
MEN1	-0.412163	4.91e-12	6.39e-11	-0.5732	2.21e-22	7.69e-21	1	1
CEP55	-1.04197	6.01e-08	3.37e-07	-1.84969	4.19e-22	1.39e-20	1	1
ACSS3	1.15008	3.17e-11	3.48e-10	1.65331	4.6e-22	1.51e-20	1	1
ARHGAP20	1.37577	1.28e-11	1.52e-10	1.93303	5.58e-22	1.79e-20	1	1
FGFR2	1.65068	7.86e-13	1.22e-11	2.18621	5.7e-22	1.83e-20	1	1
TTLL12	-0.881705	2.9e-21	2.74e-19	-0.862891	9.42e-22	2.93e-20	1	1
CDC45	-0.931621	2.17e-07	1.09e-06	-1.68459	4.09e-21	1.11e-19	1	1
GLDN	1.89572	6.37e-15	1.54e-13	2.24031	4.66e-21	1.26e-19	1	1
MYOF	1.21951	3.39e-13	5.67e-12	1.53923	8.07e-21	2.09e-19	1	1
TDRD1	-4.56561	3.11e-25	5.9e-23	-3.91849	1.22e-20	3.05e-19	1	1
CYP27A1	1.21477	1.66e-07	8.6e-07	2.1331	2.04e-20	4.9e-19	1	1
RIPK2	-0.733412	3.09e-13	5.23e-12	-0.910953	2.55e-20	5.94e-19	1	1
ESPL1	-0.671796	0.000102966	0.000308079	-1.58193	4.74e-20	1.05e-18	1	1
ACSS1	-0.844076	4.7e-20	3.34e-18	-0.81441	5.05e-20	1.11e-18	1	1
DPH2	-0.534473	4.61e-15	1.16e-13	-0.606163	8.17e-20	1.75e-18	1	1
ITGA2	0.887154	7.23e-09	4.87e-08	1.38023	8.43e-20	1.79e-18	1	1
PRDM8	1.50398	2.21e-09	1.65e-08	2.25487	1.03e-19	2.15e-18	1	1
GNB5	0.717239	3.1e-17	1.25e-15	0.747133	1.3e-19	2.66e-18	1	1
ROR2	1.32752	9.1e-11	9.13e-10	1.8057	3.07e-19	5.98e-18	1	1
KLHL13	0.989606	2.4e-12	3.33e-11	1.23789	3.61e-19	6.94e-18	1	1
SORBS1	1.20857	2.88e-09	2.09e-08	1.78685	5.29e-19	9.86e-18	1	1
DAB1	1.59182	8.63e-10	6.96e-09	2.22576	2.74e-18	4.61e-17	1	1
RAB34	1.21028	5.58e-15	1.37e-13	1.30265	5.08e-18	8.21e-17	1	1
PPARGC1B	1.01486	9.93e-13	1.5e-11	1.19617	7.33e-18	1.16e-16	1	1
KIAA0368	-0.381451	8.67e-12	1.07e-10	-0.468659	9.76e-18	1.51e-16	1	1
PLA2G4A	1.32965	4.69e-16	1.47e-14	1.35703	1.21e-17	1.85e-16	1	1
EDNRA	1.05613	1.12e-09	8.87e-09	1.45547	1.26e-17	1.91e-16	1	1
PRTFDC1	1.14803	6.56e-13	1.03e-11	1.32947	1.4e-17	2.11e-16	1	1
SLC8A1	1.20476	6.03e-10	5.05e-09	1.62791	1.56e-17	2.32e-16	1	1
TTLL6	-0.790201	3.44e-08	2.03e-07	-1.19973	1.79e-17	2.64e-16	1	1
ADD1	0.280217	4.54e-11	4.8e-10	0.353729	2.01e-17	2.95e-16	1	1
ITGA9	0.953632	4.79e-09	3.34e-08	1.34174	4.99e-17	6.84e-16	1	1
PPP1R3B	0.428279	3.53e-06	1.42e-05	0.756929	1.03e-16	1.34e-15	1	1
EVC2	1.02015	5.1e-10	4.34e-09	1.32737	1.46e-16	1.86e-15	1	1
PDE3B	-1.33966	2.77e-17	1.12e-15	-1.26037	1.57e-16	2e-15	1	1
C1orf116	-1.19056	1.42e-20	1.16e-18	-1.00573	2.26e-16	2.8e-15	1	1
KSR1	1.09939	1.36e-12	1.99e-11	1.23004	3.63e-16	4.38e-15	1	1
ZNF783	-0.403725	9.56e-07	4.25e-06	-0.660657	3.89e-16	4.67e-15	1	1
PCDH9	1.17545	4.05e-09	2.86e-08	1.58149	6.56e-16	7.62e-15	1	1
CELF2	0.767431	1.73e-06	7.33e-06	1.27367	7.62e-16	8.75e-15	1	1
CENPE	-0.568193	0.00011907	0.000352033	-1.15689	2.13e-15	2.29e-14	1	1
ZNF587	-0.531267	1.16e-12	1.73e-11	-0.574704	2.4e-15	2.56e-14	1	1
RNF217-AS1	0.828296	1.13e-10	1.11e-09	0.991143	2.53e-15	2.68e-14	1	1
AVL9	-0.560214	3.28e-13	5.5e-12	-0.589013	2.92e-15	3.06e-14	1	1
VGF	-1.14663	1.84e-05	6.46e-05	-2.06513	4.87e-15	4.99e-14	1	1
WDR48	0.292829	9.48e-12	1.16e-10	0.321412	1.38e-14	1.32e-13	1	1
OXSM	-0.376732	1.28e-08	8.21e-08	-0.496579	1.74e-14	1.65e-13	1	1
ARHGEF10L	0.573414	1.25e-14	2.84e-13	0.548503	2.15e-14	2.02e-13	1	1
NOA1	-0.530441	3.25e-14	6.78e-13	-0.515744	2.23e-14	2.09e-13	1	1
INPP5B	0.592932	2.69e-16	8.93e-15	0.527075	3.74e-14	3.41e-13	1	1
GRHL2	-0.593992	8.94e-12	1.1e-10	-0.638294	4.21e-14	3.8e-13	1	1
NADK	-0.337739	2.05e-11	2.33e-10	-0.369645	4.25e-14	3.84e-13	1	1
ITGB4	1.17922	3.38e-10	2.98e-09	1.37939	4.51e-14	4.05e-13	1	1
CYP4F3	1.94344	7.99e-15	1.89e-13	1.81974	4.58e-14	4.11e-13	1	1
KLHL5	0.757699	4.28e-10	3.7e-09	0.891135	4.68e-14	4.19e-13	1	1
ILF3	-0.214094	3.37e-08	1.99e-07	-0.284394	6.21e-14	5.48e-13	1	1
CHD1L	-0.489883	1.66e-13	2.93e-12	-0.478137	9.44e-14	8.12e-13	1	1
ALDOC	0.895174	6.1e-15	1.48e-13	0.822713	9.78e-14	8.41e-13	1	1
TRIM29	1.9473	1.51e-08	9.54e-08	2.4791	1.53e-13	1.28e-12	1	1
PTGS2	1.71021	3.8e-09	2.7e-08	2.08213	1.81e-13	1.49e-12	1	1
MYBBP1A	-0.47772	2.64e-12	3.61e-11	-0.483583	2.53e-13	2.04e-12	1	1
TIMELESS	-0.376853	1.09e-06	4.8e-06	-0.553143	2.73e-13	2.19e-12	1	1
MIOS	-0.565885	2.15e-13	3.74e-12	-0.540212	3.92e-13	3.09e-12	1	1
MASP1	1.27582	4.85e-07	2.28e-06	1.78534	5.93e-13	4.56e-12	1	1
PEG10	1.71008	1.1e-10	1.09e-09	1.85053	6.2e-13	4.75e-12	1	1
CCNL2	-0.534968	2.82e-05	9.54e-05	-0.897622	7.93e-13	6e-12	1	1
ZNF423	0.701196	9.42e-06	3.49e-05	1.09808	1.41e-12	1.03e-11	1	1
BCHE	1.428	3.08e-08	1.83e-07	1.77831	1.49e-12	1.08e-11	1	1
RASGRF2	0.620157	7.76e-07	3.51e-06	0.862149	2.05e-12	1.46e-11	1	1
RGL1	0.65852	2.82e-07	1.39e-06	0.879545	2.12e-12	1.51e-11	1	1
LRMP	1.25172	2.03e-13	3.56e-12	1.14506	3.03e-12	2.11e-11	1	1
XPOT	-0.458981	1.22e-09	9.58e-09	-0.509501	3.67e-12	2.52e-11	1	1
P2RX2	0.956876	0.000228624	0.000638539	1.76453	4.34e-12	2.96e-11	1	1
POLR1A	-0.424177	1.66e-09	1.27e-08	-0.472851	4.48e-12	3.05e-11	1	1
CCDC7	-0.452788	6.27e-06	2.39e-05	-0.674241	6.04e-12	4.04e-11	1	1
SH3PXD2A	0.719605	8.53e-09	5.65e-08	0.83349	6.83e-12	4.53e-11	1	1
KLHDC1	0.531519	1.13e-08	7.26e-08	0.620002	7.3e-12	4.81e-11	1	1
SLITRK2	1.49722	1.08e-06	4.74e-06	2.04425	8.93e-12	5.82e-11	1	1
PXDN	-1.06404	1.19e-16	4.24e-15	-0.837052	9.23e-12	6.01e-11	1	1
ZEB1	0.760224	1.87e-07	9.57e-07	0.967941	9.77e-12	6.33e-11	1	1
AGL	0.224124	0.00283585	0.00624361	0.501887	1.02e-11	6.62e-11	1	1
MLC1	1.7518	6.99e-09	4.71e-08	1.99872	1.03e-11	6.67e-11	1	1
PPP2R3A	0.532517	2.34e-10	2.15e-09	0.551344	1.24e-11	7.89e-11	1	1
SDAD1P1	0.420759	2.38e-05	8.17e-05	0.659308	1.3e-11	8.29e-11	1	1
SSTR1	-1.05324	0.000182034	0.000518153	-1.86119	1.49e-11	9.38e-11	1	1
EHBP1L1	0.66409	2.26e-08	1.38e-07	0.777754	1.63e-11	1.02e-10	1	1
B3GALT4	0.571324	1.36e-07	7.12e-07	0.708523	1.88e-11	1.18e-10	1	1
TNS4	2.01683	1.08e-07	5.8e-07	2.47347	2.16e-11	1.34e-10	1	1
NAALADL2	-0.781774	2.09e-06	8.74e-06	-1.07497	2.29e-11	1.42e-10	1	1
PSD4	-0.529753	5.65e-12	7.26e-11	-0.495955	2.29e-11	1.42e-10	1	1
MCF2L	-0.520035	3.19e-09	2.3e-08	-0.569165	2.37e-11	1.46e-10	1	1
CRHBP	1.24727	2.47e-08	1.5e-07	1.44661	2.83e-11	1.73e-10	1	1
ITGA1	0.818152	1.14e-07	6.08e-07	0.997711	2.99e-11	1.82e-10	1	1
PRKD3	0.385693	3.84e-06	1.53e-05	0.538443	3.85e-11	2.29e-10	1	1
MYO6	-1.09174	1.61e-10	1.52e-09	-1.08839	4.3e-11	2.55e-10	1	1
CSPG4	0.797693	7.75e-06	2.91e-05	1.14112	5.59e-11	3.27e-10	1	1
STK32C	-0.607283	1.38e-09	1.07e-08	-0.632616	7.17e-11	4.13e-10	1	1
RAB3GAP1	0.2531	2.42e-05	8.29e-05	0.380528	8.08e-11	4.63e-10	1	1
SLC16A7	0.902558	1.8e-07	9.22e-07	1.09248	8.24e-11	4.71e-10	1	1
HIPK2	-0.848417	1.72e-12	2.47e-11	-0.749754	9.2e-11	5.21e-10	1	1
BEST1	0.64776	7.73e-10	6.3e-09	0.655034	1.28e-10	7.11e-10	1	1
TM7SF3	0.454951	1.68e-07	8.68e-07	0.542365	1.39e-10	7.71e-10	1	1
MTHFR	-0.470583	1.05e-06	4.64e-06	-0.601147	1.49e-10	8.21e-10	1	1
CCDC171	0.395733	6.21e-06	2.37e-05	0.543878	1.87e-10	1.01e-09	1	1
ABHD2	-1.12333	1.67e-11	1.93e-10	-1.02436	1.88e-10	1.02e-09	1	1
L1CAM	1.14168	3.3e-05	0.000109869	1.70736	2.01e-10	1.08e-09	1	1
TBCD	-0.350175	8.5e-09	5.64e-08	-0.374213	2.14e-10	1.15e-09	1	1
SORCS2	0.659508	0.00052352	0.00135555	1.18143	2.15e-10	1.16e-09	1	1
KLK4	-1.62172	9.15e-17	3.34e-15	-1.17986	2.17e-10	1.16e-09	1	1
HSPA12A	0.699007	1.27e-07	6.72e-07	0.814132	2.36e-10	1.26e-09	1	1
NWD1	-1.09099	1.55e-16	5.38e-15	-0.798216	2.39e-10	1.28e-09	1	1
PRKACA	0.294675	1.27e-08	8.11e-08	0.317609	2.48e-10	1.32e-09	1	1
PLAU	1.09712	1.8e-12	2.57e-11	0.946375	2.54e-10	1.35e-09	1	1
NLRP1	0.949631	2.94e-10	2.63e-09	0.919981	2.6e-10	1.38e-09	1	1
PYGL	0.967654	6.59e-08	3.67e-07	1.09386	3.12e-10	1.64e-09	1	1
PRSS12	1.03703	2.02e-06	8.46e-06	1.33346	3.44e-10	1.8e-09	1	1
PPFIBP2	0.691838	7.91e-10	6.43e-09	0.680715	3.89e-10	2.02e-09	1	1
NFE2L1	0.194929	0.000720079	0.0018113	0.35242	4.09e-10	2.12e-09	1	1
PER1	0.662941	4.89e-05	0.000156271	0.992905	4.57e-10	2.35e-09	1	1
HLTF	-0.367222	1.05e-05	3.86e-05	-0.501057	6.73e-10	3.39e-09	1	1
SLC6A16	0.705439	6.34e-06	2.42e-05	0.938938	6.76e-10	3.4e-09	1	1
TMEM145	-0.845852	0.000122312	0.000360692	-1.31701	8.87e-10	4.38e-09	1	1
NAB2	0.495755	1.25e-06	5.42e-06	0.608855	9.05e-10	4.46e-09	1	1
GZF1	0.229693	1.5e-06	6.43e-06	0.284142	9.25e-10	4.55e-09	1	1
SLC37A4	0.396085	1.11e-05	4.05e-05	0.532748	1.27e-09	6.13e-09	1	1
ARHGEF2	0.693917	3.36e-11	3.67e-10	0.611376	1.29e-09	6.23e-09	1	1
BMPER	0.790757	0.00337694	0.00730917	1.59332	1.57e-09	7.48e-09	1	1
PPP6R2	-0.37233	1.28e-08	8.2e-08	-0.382262	1.58e-09	7.55e-09	1	1
SGSH	-0.528766	1.49e-13	2.65e-12	-0.413427	1.62e-09	7.71e-09	1	1
NID1	0.785647	1.49e-06	6.36e-06	0.956116	1.66e-09	7.88e-09	1	1
PARP9	-0.447126	2.43e-05	8.33e-05	-0.621691	1.69e-09	8.02e-09	1	1
SEMA3D	1.04178	0.000262868	0.000723869	1.65492	2.81e-09	1.3e-08	1	1
SORCS1	0.686923	0.00518986	0.0106883	1.4192	3.52e-09	1.6e-08	1	1
OLFML3	0.576715	0.000645533	0.00163878	0.974295	3.54e-09	1.61e-08	1	1
RAB24	-0.328092	0.00281086	0.00619525	-0.62867	4.66e-09	2.09e-08	1	1
ADAMTS15	0.769264	1.21e-06	5.25e-06	0.896496	5.54e-09	2.45e-08	1	1
PPM1G	-0.229024	8.42e-05	0.000255773	-0.328694	6.83e-09	2.99e-08	1	1
MAN2B1	-0.539617	1.92e-12	2.73e-11	-0.424107	7.8e-09	3.4e-08	1	1
CDK5RAP3	-0.348258	7.86e-05	0.000240517	-0.495363	8e-09	3.48e-08	1	1
TCF21	0.6015	0.00149047	0.00350113	1.06618	8.01e-09	3.48e-08	1	1
TBL1XR1	-0.385586	1.07e-05	3.91e-05	-0.48975	8.7e-09	3.75e-08	1	1
EGFLAM	0.594308	0.000104257	0.000311487	0.856032	9.47e-09	4.05e-08	1	1
EEF1E1	-0.430564	2.67e-07	1.32e-06	-0.463742	1.05e-08	4.49e-08	1	1
HIST1H2AE	-1.05844	4.83e-07	2.28e-06	-1.14571	1.86e-08	7.62e-08	1	1
AJAP1	0.49203	0.0237783	0.0415264	1.19606	1.9e-08	7.76e-08	1	1
RPS6KA5	0.645734	2.66e-11	2.95e-10	0.519735	2.29e-08	9.28e-08	1	1
IFIT5	0.450751	2.15e-05	7.44e-05	0.575898	2.32e-08	9.38e-08	1	1
GIGYF1	-0.212865	0.00295145	0.00647337	-0.39032	2.32e-08	9.38e-08	1	1
KIF17	0.86452	2.66e-10	2.4e-09	0.73476	2.38e-08	9.6e-08	1	1
SYT11	0.77059	1.1e-06	4.85e-06	0.855127	2.41e-08	9.75e-08	1	1
SIGLEC1	-0.547823	0.00489388	0.0101662	-1.05167	3.11e-08	1.24e-07	1	1
GGA1	-0.260932	2.19e-06	9.1e-06	-0.295245	3.25e-08	1.29e-07	1	1
XPC	0.295857	3.85e-07	1.85e-06	0.311698	3.28e-08	1.3e-07	1	1
NGLY1	-0.26636	7.78e-07	3.52e-06	-0.287324	3.72e-08	1.46e-07	1	1
LRRC43	1.03743	5.74e-10	4.82e-09	0.881964	4.33e-08	1.69e-07	1	1
CDK19	-1.00501	5.81e-08	3.27e-07	-0.97752	4.7e-08	1.83e-07	1	1
ZNF668	-0.209322	0.00283704	0.00624548	-0.372298	5.18e-08	2e-07	1	1
CHERP	-0.268432	1.36e-07	7.15e-07	-0.267905	5.27e-08	2.04e-07	1	1
TMEM189	0.359946	1.58e-06	6.74e-06	0.394271	5.67e-08	2.18e-07	1	1
GPATCH4	-0.362616	3.45e-07	1.67e-06	-0.372894	5.99e-08	2.3e-07	1	1
AOC2	-0.530606	0.000123674	0.000364417	-0.71909	8.68e-08	3.25e-07	1	1
SYNJ2	-0.448894	1.22e-07	6.46e-07	-0.437089	9.62e-08	3.58e-07	1	1
ZNF652	-0.644502	2.26e-11	2.55e-10	-0.491118	1.05e-07	3.89e-07	1	1
SGSM3	-0.471319	2.17e-07	1.09e-06	-0.461515	1.48e-07	5.37e-07	1	1
FGFR1OP2	0.332409	7.46e-08	4.12e-07	0.312931	1.54e-07	5.57e-07	1	1
PRX	0.440748	1.96e-06	8.22e-06	0.469572	1.63e-07	5.87e-07	1	1
MAP6	0.444812	2e-05	6.98e-05	0.529672	1.64e-07	5.91e-07	1	1
BMP4	0.779255	6.45e-06	2.46e-05	0.87619	1.65e-07	5.92e-07	1	1
PPEF1	-0.711884	0.000182715	0.000519851	-0.96696	1.69e-07	6.07e-07	1	1
IRGQ	-0.304989	1.04e-06	4.59e-06	-0.315686	1.73e-07	6.2e-07	1	1
TRIM68	-0.77351	6.41e-09	4.36e-08	-0.669415	1.81e-07	6.46e-07	1	1
HSPA9	-0.239286	3.84e-05	0.000126014	-0.293544	1.94e-07	6.91e-07	1	1
CARD16	0.852185	1.53e-08	9.61e-08	0.753648	2.06e-07	7.31e-07	1	1
DDX56	-0.219895	0.000531403	0.00137422	-0.319826	2.2e-07	7.77e-07	1	1
KCTD8	1.12186	0.000144796	0.00042073	1.4855	2.22e-07	7.83e-07	1	1
GFPT2	0.47263	0.00204064	0.00464948	0.771971	2.28e-07	8.04e-07	1	1
C3orf62	-0.329919	6.32e-07	2.91e-06	-0.329199	2.71e-07	9.45e-07	1	1
ZNF549	-0.233994	2.98e-05	0.000100368	-0.276206	3.71e-07	1.27e-06	1	1
ZNF615	-0.799281	4.21e-10	3.66e-09	-0.622393	4.03e-07	1.38e-06	1	1
COL4A4	0.549293	0.00227541	0.00512859	0.872621	6.22e-07	2.07e-06	1	1
POLR3A	-0.354391	6.1e-10	5.09e-09	-0.272628	7.03e-07	2.32e-06	1	1
MEGF10	0.55128	0.00458066	0.0095945	0.934378	7.87e-07	2.58e-06	1	1
TNKS	0.182539	0.0205368	0.0364703	0.374791	1.04e-06	3.36e-06	1	1
PIK3AP1	-0.59838	4.31e-06	1.71e-05	-0.614137	1.07e-06	3.45e-06	1	1
MED26	-0.196143	7.43e-05	0.000228636	-0.232942	1.21e-06	3.84e-06	1	1
MKRN1	-0.143579	0.00273832	0.00604694	-0.225852	1.25e-06	3.98e-06	1	1
SNX18	0.269078	0.000165708	0.000476837	0.331335	1.73e-06	5.37e-06	1	1
TBC1D2B	0.38044	1.44e-06	6.18e-06	0.363508	1.85e-06	5.73e-06	1	1
MRPS25	-0.224135	0.00084937	0.00209899	-0.309895	2.02e-06	6.24e-06	1	1
NSMAF	-0.321569	8.71e-06	3.24e-05	-0.331317	2.15e-06	6.61e-06	1	1
DPP6	0.974152	0.00404651	0.00859389	1.56024	2.18e-06	6.68e-06	1	1
PREX2	0.689644	1.18e-05	4.29e-05	0.721074	2.18e-06	6.68e-06	1	1
TUBGCP3	0.234543	3.38e-06	1.36e-05	0.230571	2.26e-06	6.93e-06	1	1
SERINC1	0.263742	0.00143833	0.00338901	0.375366	2.99e-06	9.02e-06	1	1
AP3B2	0.624661	0.000104891	0.000313077	0.728336	3.03e-06	9.13e-06	1	1
FAM174B	-0.633332	3.59e-09	2.57e-08	-0.479217	3.28e-06	9.82e-06	1	1
ITGA8	0.942015	7.71e-05	0.000236161	1.07327	3.3e-06	9.89e-06	1	1
ZNF276	-0.414593	2.47e-05	8.45e-05	-0.441357	3.47e-06	1.04e-05	1	1
HTATSF1	0.167905	0.000127136	0.000373842	0.194919	4.38e-06	1.29e-05	1	1
RAB5C	0.203656	0.000168126	0.000482816	0.240584	4.47e-06	1.31e-05	1	1
ALDH1B1	0.284295	0.00284445	0.00625956	0.421273	5.27e-06	1.53e-05	1	1
BACH2	0.522202	0.000683117	0.00172479	0.677676	5.5e-06	1.59e-05	1	1
SEPHS2	-0.206948	0.00165215	0.00384076	-0.288711	6.09e-06	1.75e-05	1	1
AMIGO2	1.18686	3.92e-11	4.2e-10	0.77557	6.21e-06	1.78e-05	1	1
SLX4	-0.247679	0.000132655	0.000388397	-0.281665	7.17e-06	2.04e-05	1	1
VAPA	0.201118	2.23e-05	7.67e-05	0.205567	7.32e-06	2.08e-05	1	1
SLC7A5	0.943881	4.24e-06	1.68e-05	0.883485	8.18e-06	2.31e-05	1	1
HSP90AB1	-0.21295	0.00015514	0.000448316	-0.242298	8.77e-06	2.47e-05	1	1
CDH2	1.33659	1.85e-06	7.81e-06	1.19618	9.59e-06	2.68e-05	1	1
TBC1D5	0.155448	0.0112479	0.0213115	0.261987	1.09e-05	3.04e-05	1	1
GALNT15	0.729062	8.45e-05	0.000256937	0.778117	1.44e-05	3.92e-05	1	1
PACS1	-0.240755	0.000253806	0.000701011	-0.275163	1.57e-05	4.24e-05	1	1
EPRS	-0.238418	0.000665424	0.00168579	-0.292424	1.64e-05	4.43e-05	1	1
WDR77	-0.267128	4.63e-05	0.000148997	-0.272476	1.72e-05	4.62e-05	1	1
KIF21A	-0.446144	0.000199884	0.000564169	-0.497472	1.83e-05	4.89e-05	1	1
TBC1D7	-0.310965	6.87e-05	0.000212518	-0.321341	2.09e-05	5.53e-05	1	1
PPRC1	-0.348303	1.7e-06	7.22e-06	-0.298163	2.12e-05	5.61e-05	1	1
RB1	0.22024	0.00999483	0.019175	0.349809	2.5e-05	6.54e-05	1	1
PCF11	-0.163734	0.0168384	0.0305833	-0.279639	2.62e-05	6.85e-05	1	1
FKBP4	-0.38674	2.69e-05	9.13e-05	-0.372206	2.86e-05	7.43e-05	1	1
ASAP1	0.442082	3.01e-05	0.00010115	0.426309	3.09e-05	7.97e-05	1	1
SCNN1B	1.55498	1.33e-07	7.02e-07	1.16454	3.94e-05	0.000100111	1	1
TMTC3	0.241669	0.00276069	0.00609488	0.318864	4.6e-05	0.000115453	1	1
TYRP1	-0.758593	0.0209678	0.037114	-1.29914	4.65e-05	0.000116518	1	1
KLK14	-0.717514	0.0267556	0.0460882	-1.26008	6.14e-05	0.00015111	1	1
PPIG	0.151171	0.00900628	0.0174721	0.224036	6.57e-05	0.000160921	1	1
NFIL3	0.325161	0.0158241	0.0289321	0.521175	6.71e-05	0.000164238	1	1
SPECC1	-0.296998	0.00928778	0.0179615	-0.439424	7.22e-05	0.000175822	1	1
ZNF512	0.281854	0.0120117	0.0225685	0.427668	8.5e-05	0.000204634	1	1
UBC	0.328468	2.88e-07	1.42e-06	0.240091	9.48e-05	0.000226435	1	1
GABRE	0.979323	0.000241225	0.000669674	0.990088	0.000122436	0.000287456	1	1
SRP54	-0.231242	0.000119702	0.000353676	-0.222178	0.000129524	0.000302749	1	1
ZNF689	0.181644	0.000550381	0.00141967	0.194104	0.000134369	0.000313675	1	1
PAX5	-1.3328	6.61e-06	2.51e-05	-1.08533	0.00013925	0.000324616	1	1
MLEC	-0.329545	5.68e-06	2.19e-05	-0.264767	0.000152945	0.000355016	1	1
ZFP64	-0.154135	0.00210968	0.00479196	-0.183156	0.000160354	0.000370625	1	1
NELL1	0.585081	0.0218307	0.038512	0.928788	0.000173769	0.00039908	1	1
MUC2	-2.27089	3.31e-09	2.38e-08	-1.37806	0.000174638	0.000400826	1	1
HCFC1	-0.193469	0.00135056	0.00319939	-0.218892	0.000178037	0.000407864	1	1
ACCS	-0.477118	0.000199727	0.000563813	-0.462925	0.000186569	0.000426352	1	1
CPEB4	0.349913	0.000736133	0.0018474	0.371822	0.000206975	0.000469259	1	1
ZNF365	0.549525	0.00138018	0.00326496	0.614156	0.000219038	0.000494418	1	1
JADE1	0.252251	0.0185367	0.0333491	0.383725	0.00021964	0.000495595	1	1
PLEKHA5	0.278916	0.000343674	0.00092402	0.276695	0.00023667	0.000530192	1	1
SLC34A2	1.68506	0.000225854	0.000631664	1.62049	0.000239814	0.000536518	1	1
PLBD2	-0.491496	1.24e-10	1.2e-09	-0.26499	0.000273262	0.000606195	1	1
ZNF473	-0.482371	0.00203299	0.00463376	-0.531625	0.000437353	0.000937679	1	1
BAZ2A	-0.228353	0.00331022	0.00718333	-0.264457	0.000437394	0.000937679	1	1
TJP1	-0.368024	4.39e-05	0.000142336	-0.304916	0.000444316	0.000951745	1	1
RCL1	-0.209851	0.000770179	0.00192211	-0.20927	0.000516998	0.00109672	1	1
PYROXD2	-0.540778	0.000173308	0.000495919	-0.482126	0.00052073	0.00110375	1	1
THRAP3	-0.280509	2.32e-08	1.41e-07	-0.166108	0.000548116	0.00115701	1	1
GUCY1A2	0.630964	0.000327173	0.000884429	0.585841	0.000548793	0.00115831	1	1
SBNO1	0.152751	0.0173415	0.0314289	0.21322	0.000604627	0.00126773	1	1
COL28A1	-0.651289	0.00441619	0.00928802	-0.754586	0.000650091	0.00135596	1	1
SMU1	0.0960824	0.00621589	0.0125572	0.115058	0.000707667	0.00146725	1	1
CYFIP1	-0.214893	0.000280679	0.000766955	-0.192363	0.000751982	0.00155231	1	1
RPL11	-0.339139	0.000396166	0.00105241	-0.310368	0.000782015	0.00160981	1	1
CEACAM6	0.726314	0.0241606	0.0421301	1.0457	0.000803276	0.0016486	1	1
MUC6	1.64166	0.00807098	0.0158462	2.00122	0.000845205	0.00172984	1	1
DNM1L	0.149209	0.00468985	0.00978429	0.16988	0.000872117	0.00178063	1	1
IGHG2	-0.907832	0.0116675	0.0219913	-1.15727	0.000893965	0.00182194	1	1
CLEC1A	0.406348	0.00513081	0.0105844	0.466268	0.000898648	0.00183088	1	1
PON2	-0.213203	0.000884767	0.00217625	-0.205177	0.00092202	0.00187435	1	1
SULT4A1	-1.46109	0.000379519	0.00101198	-1.31133	0.000948262	0.00192366	1	1
ITGA2B	0.772254	9.36e-07	4.17e-06	0.496989	0.00100736	0.00203503	1	1
PTPN3	-0.243733	0.000329534	0.000889896	-0.214949	0.00102932	0.00207689	1	1
DISC1	-0.705129	3.22e-07	1.57e-06	-0.434039	0.00103751	0.00209158	1	1
TLN2	-0.318401	0.0104162	0.0199036	-0.389706	0.00119213	0.00238272	1	1
USP9X	0.212382	0.00207225	0.00471438	0.215455	0.00122218	0.00243721	1	1
ARMC5	-0.260505	0.00322305	0.00700736	-0.269998	0.00158101	0.00309288	1	1
TAF6	0.270018	4.97e-05	0.000158751	0.202063	0.00161514	0.00315261	1	1
COL4A2	0.586279	0.000125227	0.000368697	0.463365	0.00165498	0.00322524	1	1
ALDH1L1	0.535831	0.0288309	0.049185	0.743039	0.00174005	0.00337676	1	1
MMP12	-0.956644	0.00565927	0.0115509	-1.04052	0.00184969	0.00357222	1	1
ANKRD44	0.451545	2.08e-05	7.2e-05	0.316657	0.0019157	0.00369003	1	1
PPP1R13B	-0.281614	7.19e-06	2.71e-05	-0.186651	0.00196664	0.00378103	1	1
SLC8B1	-0.315934	5.86e-06	2.25e-05	-0.202861	0.00245729	0.00463679	1	1
GSDMD	0.560968	0.00110933	0.00267469	0.501559	0.00251613	0.00474103	1	1
SPINK5	1.18749	2.03e-05	7.05e-05	0.808392	0.00255439	0.00480771	1	1
NRIP1	-0.382225	0.00126565	0.00301882	-0.342271	0.00277977	0.00519688	1	1
LRPPRC	-0.190272	0.00467218	0.00975294	-0.193822	0.00285816	0.00532936	1	1
ACSM3	-0.653851	0.000222082	0.000621991	-0.508649	0.00287392	0.00535713	1	1
NUFIP2	-0.140921	0.0162377	0.0296207	-0.168212	0.00301041	0.00558894	1	1
IGHV3-23	-0.863138	0.0232786	0.0407232	-1.09131	0.00302276	0.00561024	1	1
STOX1	0.640172	4.87e-05	0.000155902	0.444684	0.00336752	0.00620132	1	1
PCDHB14	-0.274496	0.0252224	0.0437787	-0.340851	0.00406223	0.00735135	1	1
PGBD2	-0.121044	0.0282777	0.0483441	-0.151991	0.00440511	0.0079236	1	1
TBC1D32	-0.299926	0.00262171	0.00581803	-0.273337	0.00450064	0.0080836	1	1
SUMF1	-0.226005	0.000389623	0.00103676	-0.174324	0.00452716	0.00812332	1	1
ATG2B	-0.235976	0.000720514	0.00181215	-0.189528	0.00484859	0.00864118	1	1
RPS6KA6	-0.297577	0.00153006	0.00358545	-0.254666	0.00493953	0.00879136	1	1
PPP2R5E	0.127143	0.0113231	0.0214342	0.135547	0.00520647	0.00923079	1	1
C19orf44	0.181087	0.00290206	0.00637871	0.163194	0.00543008	0.00959401	1	1
SAMD4B	-0.0963038	0.0282924	0.0483648	-0.114715	0.00689038	0.011917	1	1
PCDHB15	0.292514	0.0225568	0.0396562	0.329021	0.0079472	0.0135905	1	1
EEA1	0.180925	0.0283964	0.048515	0.21015	0.00844959	0.0143869	1	1
PGM3	-0.518115	8.1e-07	3.65e-06	-0.263247	0.0088876	0.0150653	1	1
ELMO1	0.396012	0.00188695	0.0043279	0.318296	0.00960399	0.0161642	1	1
NLGN4X	0.697258	0.00490844	0.010193	0.616534	0.00996419	0.0167231	1	1
PDK3	0.330405	0.00179495	0.00413467	0.257734	0.0115428	0.0191442	1	1
USP48	-0.0964008	0.0205127	0.0364416	-0.101173	0.0118468	0.0196061	1	1
HDAC9	0.688774	0.00228413	0.00514446	0.527715	0.0153513	0.0248152	1	1
HSPA5	-0.325974	0.000199716	0.000563813	-0.202773	0.0161889	0.0260618	1	1
RAPGEF2	-0.202587	0.0112236	0.0212743	-0.185361	0.016257	0.0261636	1	1
DLGAP2	-1.11187	3.07e-06	1.25e-05	-0.547991	0.0164397	0.0264251	1	1
TCN1	0.922066	0.0226635	0.0398097	0.933235	0.0169426	0.0271565	1	1
BTBD10	0.166795	0.000337841	0.000910194	0.106161	0.0177788	0.0283612	1	1
ARID5B	-0.405299	5.64e-06	2.18e-05	-0.20251	0.0180366	0.0287351	1	1
CLTC	-0.181821	0.0112298	0.0212817	-0.162344	0.0190175	0.0301934	1	1
PTPRE	0.354767	0.00602051	0.0122133	0.29034	0.0198125	0.031353	1	1
RFTN1	0.492114	0.00053178	0.001375	0.317141	0.0204078	0.0322092	1	1
EGF	-1.2424	2.95e-07	1.45e-06	-0.536751	0.0205834	0.0324503	1	1
LCP1	-0.714277	1.15e-06	5.01e-06	-0.32531	0.0206899	0.0325927	1	1
PFKM	0.227523	0.0182272	0.0328403	0.214859	0.0209476	0.0329653	1	1
MLLT3	-0.216003	0.00819168	0.0160592	-0.174997	0.0264034	0.0408258	1	1
