# Supplementary material for: Mapping the Germline and Somatic Mutation Interaction Landscape in Indolent and Aggressive Prostate Cancers
Source: J Oncol. 2019 Nov 13;2019:4168784. doi: 10.1155/2019/4168784 (PMC6878815; doi:10.1155/2019/4168784)
Supplement: Supplementary Materials — Supplementary Table SA: a comprehensive list of single-nucleotide polymorphisms (herein called genetic variants) and genes associated with increased risk of developing prostate cancer and published GWAS reports denoted by the PubMed ID and actual reference from which the data were extracted. Supplementary Table S1A: a complete list of somatic mutated genes found to be significantly differentially expressed in indolent (sheet-1) and aggressive (sheet-2) tumors matched with controls. Supplementary Table S1B: a complete list of nonsomatic mutated genes found to be significantly differentially expressed in indolent (sheet-1) and aggressive (sheet-2) tumors matched with controls. Supplementary Table S2: a comprehensive list of somatic mutated genes in indolent (sheet-1) and aggressive (sheet-2) PCa obtained from TCGA. Supplementary Table S2A: a complete list of somatic mutated genes found to be significantly differentially expressed in only indolent PCa, only aggressive PCa, and both tumors. Supplementary Table S1: a complete list of significantly differentially expressed somatic mutated genes distinguishing patients with indolent PCa from patients with aggressive PCa. Supplementary Table S3A: a complete list of germline mutated genes significantly associated with indolent PCa. Supplementary Table S3B: a complete list of germline mutated genes significantly associated with aggressive PCa. Supplementary Table ISN4: molecular networks enriched with germline and somatic mutations in indolent PCa. Supplementary Table ISN5: molecular networks enriched with germline and somatic mutations in aggressive PCa. [file 4168784.f1.zip › 4168784.f1/Supp_Table_S3A.xlsx]

## Sheet: Indolent 55 genes
Supplementary Table S3A: A complete list of germline mutated genes significantly associated with indolent PCa.
Genes	GWAS				RNAseq			Somatic
	Cytoband	Most significant SNP	p-value	events	logFC	p-value	FDR	Mutation events
KLK3	19q13.33	rs17632542	2.00E-340	16	-1.7444	9.22e-16	2.7e-14	2
TNRC6B	22q13.1	rs58133635	5e-12	7	-0.246661	0.000338915	0.000912556	1
NKX3-1	8p21.2	rs13272392	4e-34	5	-1.47245	6.2e-20	4.25e-18	3
FGFR2	10q26.12	rs10886902	2e-53	4	1.65068	7.86e-13	1.22e-11	1
ANK2	4q25	rs7694725	2e-06	2	1.22707	2.42e-10	2.21e-09	4
DNAH5	19q13.2	rs887391	2e-06	2	-2.71423	1.71e-31	1.15e-28	3
TNC	9q33.1	rs7847271	4e-06	2	0.422972	0.017506	0.0316865	2
ACTC1	8q24.21	rs6983267	4e-06	2	2.67687	2.77e-12	3.78e-11	1
HOXB13	17q21.32	rs138213197	9e-63	2	-1.75859	3.39e-22	3.95e-20	1
CLVS2	6q22.31	rs13192613	3e-06	2	1.48482	3.43e-07	1.66e-06	1
IRX4	5p15.33	rs12653946	3.9e-18	2	-1.99854	1.1e-10	1.09e-09	1
PPFIBP2	11p15.4	rs12791447	4e-08	2	0.691838	7.91e-10	6.43e-09	1
FYCO1	3p21.3	rs1545985	6.61e-06	2	0.32265	0.000232627	0.000648604	1
AMIGO2	22q13.2	rs5759167	2e-06	2	1.18686	3.92e-11	4.2e-10	1
TCF7L2	10q25.2	rs7094871	5e-08	2	0.20782	0.00407269	0.0086445	1
MN1	22q12.1	rs6005451	4e-06	2	0.749496	0.000240877	0.00066891	1
SYK	4q24	rs7679673	1e-06	2	0.524074	0.000277654	0.000759366	1
CEP152	15q21.1	rs784411	1e-07	2	0.288304	0.00444308	0.00933748	1
PKHD1	6p21.2-p12	rs10498792	3e-06	1	0.750136	0.019629	0.0350813	5
HERC2	15q13	rs6497287	0.004	1	-0.164305	0.0239246	0.041766	5
COL6A3	2q37.3	rs7584330	3e-09	1	0.494311	0.0048277	0.0100457	4
LRP1B	2q21.2	rs10210358	2e-06	1	1.35168	1.71e-07	8.8e-07	3
MAML3	4q28	rs736349	0.002	1	-0.582312	2.72e-12	3.72e-11	3
TMPRSS2	21q22.3	rs1041449	3e-08	1	-0.869666	1.06e-05	3.89e-05	3
NOTCH4	6p21.32	rs3096702	1e-11	1	0.553612	4.2e-06	1.66e-05	3
OTX1	2p15	rs58235267	6e-07	1	-2.96977	7.46e-27	2.02e-24	2
RBFOX1	16p13.3	rs112896149	5e-06	1	1.46356	1.14e-06	5e-06	2
MECOM	3q26.2	rs142436749	5e-09	1	1.46953	1.18e-18	6.41e-17	2
ZNF285	19q13.31	rs2571082	7e-06	1	-0.494898	2.9e-10	2.6e-09	2
POU2F2	19q13.2	rs61088131	9e-09	1	0.685308	9.19e-07	4.1e-06	2
PTGFRN	1p13.1	rs2806864	6e-07	1	0.237512	0.00173384	0.00400926	2
HAPLN1	5q14.3	rs4466137	3e-06	1	1.20879	0.00215118	0.00487658	2
COL23A1	5q35.3	rs4976790	7e-09	1	1.16299	7.68e-09	5.14e-08	1
FAM111B	11q12.1	rs1938781	1.1e-10	1	-1.27267	5.36e-10	4.53e-09	1
FAM111A	11q12.1	rs1938781	1.1e-10	1	-0.923075	1.1e-17	4.89e-16	1
FGF10	5p12	rs2121875	1e-08	1	1.34425	3.9e-07	1.87e-06	1
MLPH	2q37.3	rs2292884	4e-11	1	-0.914735	5.64e-15	1.38e-13	1
ZBTB38	3q23	rs1991431	3e-11	1	0.486632	1.76e-07	9.04e-07	1
PRDM15	21q22.3	rs6586243	7.79e-06	1	-0.296595	2.13e-08	1.31e-07	1
BCL11A	2p16.1	rs2556375	6e-19	1	1.32652	8.94e-08	4.87e-07	1
NAALADL2	3q26.31	rs78943174	4e-08	1	-0.781774	2.09e-06	8.74e-06	1
MYO6	6q14.1	rs9443189	4e-08	1	-1.09174	1.61e-10	1.52e-09	1
GALNTL6	4q34.1	rs494770	0.01	1	-1.09491	3.26e-05	0.000109001	1
KCNQ1	11p15.5	rs231362	0.01	1	0.577518	4.76e-05	0.000152667	1
ZNF652	17q21.32	rs7210100	3e-13	1	-0.644502	2.26e-11	2.55e-10	1
LMTK2	7q21.3	rs6465657	7e-37	1	-0.408915	4.5e-07	2.13e-06	1
TUBGCP3	13q34	rs7325069	3e-06	1	0.234543	3.38e-06	1.36e-05	1
WWOX	16q23.3-q24.1	rs11150069	9.43e-06	1	0.236701	0.00951335	0.0183573	1
IL1RAPL1	Xp22.1-p21.3	rs225061	0.000971	1	-0.99077	0.00154235	0.00360964	1
LARP4B	10p15.3	rs141536087	9e-13	1	-0.292418	1.86e-08	1.15e-07	1
MAD1L1	7p22.3	rs527510716	5e-08	1	-0.249701	0.00882339	0.0171607	1
FREM1	9p22.3	rs1552895	0.002	1	0.656195	0.000392757	0.0010438	1
NR2F2	15q26.2	rs11637980	2e-06	1	0.217972	0.00343137	0.00741392	1
BCAS1	20q13.2	rs6091758	6e-18	1	-0.930989	4.88e-05	0.000155909	1
ADAMTS12	q35	rs2548035	5.11e-05	1	0.407981	0.0163925	0.0298558	1
