# Supplementary material for: Mapping the Germline and Somatic Mutation Interaction Landscape in Indolent and Aggressive Prostate Cancers
Source: J Oncol. 2019 Nov 13;2019:4168784. doi: 10.1155/2019/4168784 (PMC6878815; doi:10.1155/2019/4168784)
Supplement: Supplementary Materials — Supplementary Table SA: a comprehensive list of single-nucleotide polymorphisms (herein called genetic variants) and genes associated with increased risk of developing prostate cancer and published GWAS reports denoted by the PubMed ID and actual reference from which the data were extracted. Supplementary Table S1A: a complete list of somatic mutated genes found to be significantly differentially expressed in indolent (sheet-1) and aggressive (sheet-2) tumors matched with controls. Supplementary Table S1B: a complete list of nonsomatic mutated genes found to be significantly differentially expressed in indolent (sheet-1) and aggressive (sheet-2) tumors matched with controls. Supplementary Table S2: a comprehensive list of somatic mutated genes in indolent (sheet-1) and aggressive (sheet-2) PCa obtained from TCGA. Supplementary Table S2A: a complete list of somatic mutated genes found to be significantly differentially expressed in only indolent PCa, only aggressive PCa, and both tumors. Supplementary Table S1: a complete list of significantly differentially expressed somatic mutated genes distinguishing patients with indolent PCa from patients with aggressive PCa. Supplementary Table S3A: a complete list of germline mutated genes significantly associated with indolent PCa. Supplementary Table S3B: a complete list of germline mutated genes significantly associated with aggressive PCa. Supplementary Table ISN4: molecular networks enriched with germline and somatic mutations in indolent PCa. Supplementary Table ISN5: molecular networks enriched with germline and somatic mutations in aggressive PCa. [file 4168784.f1.zip › 4168784.f1/Supp_Table_S3B.xlsx]

## Sheet: Aggressive 70 genes
Supplementary Table S3B: A complete list of germline mutated genes significantly associated with aggressive PCa.
Genes	GWAS				RNAseq			Somatic
	Cytoband	Most sign SNP	p-value	events	logFC	p-value	FDR	mutation events
KLK3	19q13.33	rs17632542	2.00E-340	16	-1.30381	3.11e-10	1.64e-09	1
NKX3-1	8p21.2	rs13272392	4e-34	5	-1.36338	1.5e-18	2.63e-17	1
FGFR2	10q26.12	rs10886902	2e-53	4	2.18621	5.7e-22	1.83e-20	1
KLK2	19q13.33	rs2735839	6e-37	4	-1.61277	1.35e-15	1.49e-14	1
SLC22A3	6q25.3	rs4646284	3.2e-52	4	1.41289	7.64e-08	2.88e-07	1
POU5F1B	8q24.21	rs1447295	4e-23	3	-1.38116	2.08e-19	4.16e-18	1
RNASEL	1q25	rs486907	0.004	3	0.686902	3.01e-18	5.01e-17	1
VGLL3	3p12.1	rs9757252	5e-06	3	1.17384	0.00197009	0.00378688	1
ZNF827	4q31.22	rs56935123	4e-09	2	0.339869	0.00239241	0.00452409	3
KIF13A	6p22.3x8q24.21	rs10456809	5e-06	2	0.159737	0.0272589	0.041976	3
DNAH5	19q13.2	rs887391	2e-06	2	-2.39344	5.07e-27	4.17e-25	2
TRIM31	6p22.1	rs7767188	2e-08	2	1.39915	3.12e-09	1.43e-08	2
TCF7L2	10q25.2	rs7094871	5e-08	2	0.309278	1.06e-05	2.96e-05	2
EPHA10	1p34.3	rs731174	5e-06	2	-2.21788	9.01e-48	3.32e-44	1
HOXB13	17q21.32	rs138213197	9e-63	2	-1.75615	1.69e-23	7.14e-22	1
PDLIM5	4q22.3	rs17021918	1e-24	2	-1.83246	9.72e-22	2.99e-20	1
ANK2	4q25	rs7694725	2e-06	2	1.54179	4e-16	4.78e-15	1
SLC19A2	1q23.3	rs3765227	0.000126	2	-0.75752	4.63e-13	3.62e-12	1
PPFIBP2	11p15.4	rs12791447	4e-08	2	0.680715	3.89e-10	2.02e-09	1
ADGRG1	16q21	rs11863709	2e-11	2	0.468436	3.46e-06	1.03e-05	1
TBX5	12q24.21	rs1270884	1e-18	2	1.35908	5.11e-06	1.49e-05	1
TNC	9q33.1	rs7847271	4e-06	2	0.782927	6.1e-06	1.75e-05	1
AMIGO2	22q13.2	rs5759167	2e-06	2	0.77557	6.21e-06	1.78e-05	1
LRP1B	2q21.2	rs10210358	2e-06	1	2.27403	6.03e-19	1.11e-17	10
ATF7IP	12p13.1	rs3213764	2e-09	1	0.277684	0.000668707	0.00139211	3
FREM1	9p22.3	rs1552895	0.002	1	0.569409	0.00142899	0.0028146	3
SIX1	14q23.1	rs7153648	2e-09	1	-1.42928	1.44e-18	2.53e-17	2
PRDM15	21q22.3	rs6586243	7.79e-06	1	-0.370462	7.15e-13	5.44e-12	2
BCL11A	2p16.1	rs2556375	6e-19	1	1.63017	1.47e-11	9.29e-11	2
UHRF1BP1	6p21.31	rs9469899	5e-09	1	-0.471559	1.03e-09	5.03e-09	2
GLI2	2q14	rs11122834	5e-06	1	0.835604	2.73e-07	9.54e-07	2
LMTK2	7q21.3	rs6465657	7e-37	1	-0.37434	1.67e-06	5.21e-06	2
COL6A3	2q37.3	rs7584330	3e-09	1	0.679422	6.43e-05	0.000157725	2
MDM4	1q32.1	rs4245739	3e-24	1	-0.261284	0.000207766	0.000470878	2
TBX3	12q24.21	rs11067228	1e-14	1	0.361353	0.000986672	0.00199587	2
KIAA1211	4q12	rs629242	7.25e-07	1	0.619578	0.00382609	0.00696436	2
FARP2	2q37.3	rs3771570	1e-14	1	-0.200118	0.00777605	0.0133163	2
CDKN1B	12p13.1	rs2066827	2e-09	1	0.153387	0.0205762	0.0324433	2
FERMT2	14q22.1	rs8008270	6e-16	1	1.39226	2.98e-26	2.14e-24	1
OTX1	2p15	rs58235267	6e-07	1	-2.80126	8.38e-26	5.46e-24	1
RBFOX1	16p13.3	rs112896149	5e-06	1	2.7127	1.04e-19	2.18e-18	1
EIF2S3	Xp22.11	rs6627995	1e-13	1	-0.439958	1.57e-14	1.49e-13	1
B3GAT1	11q25	rs878987	5e-08	1	-1.6784	5.18e-13	4.02e-12	1
ZNF285	19q13.31	rs2571082	7e-06	1	-0.524222	5.59e-12	3.75e-11	1
FTO	16q12.2	rs9939609	0.04	1	0.495986	9.64e-12	6.25e-11	1
NAALADL2	3q26.31	rs78943174	4e-08	1	-1.07497	2.29e-11	1.42e-10	1
EBF2	8p21.2	rs11135910	9e-13	1	-1.81947	3.01e-11	1.83e-10	1
MYO6	6q14.1	rs9443189	4e-08	1	-1.08839	4.3e-11	2.55e-10	1
TTC7A	2p16.3	rs10194115	5e-07	1	0.438368	6.3e-11	3.66e-10	1
BMPR1A	10q22.3	rs11597689	0.03	1	0.429302	5.45e-10	2.78e-09	1
POU2F2	19q13.2	rs61088131	9e-09	1	0.833513	8.11e-10	4.03e-09	1
KLHL15	Xp22.11	rs6627995	1e-13	1	0.554652	3.52e-09	1.6e-08	1
TBX1	22q11.21	rs2238776	2e-08	1	-1.51472	1.08e-08	4.61e-08	1
TCF4	18q21.2	rs28607662	3e-08	1	0.58444	3.4e-08	1.35e-07	1
ZNF652	17q21.32	rs7210100	3e-13	1	-0.491118	1.05e-07	3.89e-07	1
SMAD9	13q13.3	rs140971918	4e-06	1	0.550612	4.27e-07	1.45e-06	1
ITGA6	2q31.1	rs12621278	2e-42	1	0.426162	1.55e-06	4.86e-06	1
TUBGCP3	13q34	rs7325069	3e-06	1	0.230571	2.26e-06	6.93e-06	1
KCNN3	1q21.3	rs1218582	1e-08	1	0.762617	3.58e-06	1.06e-05	1
PTGFRN	1p13.1	rs2806864	6e-07	1	0.320087	1.34e-05	3.68e-05	1
ADNP	20q13.13	rs12480328	5e-11	1	-0.207601	9.89e-05	0.000235403	1
NOTCH4	6p21.32	rs3096702	1e-11	1	0.426161	0.000232754	0.000522244	1
PKNOX2	11q24.2	rs138466039	2e-11	1	0.546351	0.00124293	0.00247485	1
SHROOM2	Xp22.2	rs2405942	2e-12	1	-0.268818	0.00145351	0.00285985	1
MYO9B	19p13.11	rs11666569	8e-09	1	0.153571	0.00272435	0.00510158	1
CDYL	6p25.1	rs79774606	9e-06	1	0.149164	0.00670638	0.0116239	1
HAPLN1	5q14.3	rs4466137	3e-06	1	1.02638	0.00692195	0.0119649	1
BRCA1	17q21.31	rs1799950	0.01	1	-0.260841	0.00895605	0.0151693	1
KLF4	9q31.2	rs817826	5e-14	1	0.344385	0.017726	0.0282867	1
PHF20L1	8q24.22	rs2472537	0.000212	1	-0.147781	0.0236478	0.036862	1
