# Supplementary material for: Mapping the Germline and Somatic Mutation Interaction Landscape in Indolent and Aggressive Prostate Cancers
Source: J Oncol. 2019 Nov 13;2019:4168784. doi: 10.1155/2019/4168784 (PMC6878815; doi:10.1155/2019/4168784)
Supplement: Supplementary Materials — Supplementary Table SA: a comprehensive list of single-nucleotide polymorphisms (herein called genetic variants) and genes associated with increased risk of developing prostate cancer and published GWAS reports denoted by the PubMed ID and actual reference from which the data were extracted. Supplementary Table S1A: a complete list of somatic mutated genes found to be significantly differentially expressed in indolent (sheet-1) and aggressive (sheet-2) tumors matched with controls. Supplementary Table S1B: a complete list of nonsomatic mutated genes found to be significantly differentially expressed in indolent (sheet-1) and aggressive (sheet-2) tumors matched with controls. Supplementary Table S2: a comprehensive list of somatic mutated genes in indolent (sheet-1) and aggressive (sheet-2) PCa obtained from TCGA. Supplementary Table S2A: a complete list of somatic mutated genes found to be significantly differentially expressed in only indolent PCa, only aggressive PCa, and both tumors. Supplementary Table S1: a complete list of significantly differentially expressed somatic mutated genes distinguishing patients with indolent PCa from patients with aggressive PCa. Supplementary Table S3A: a complete list of germline mutated genes significantly associated with indolent PCa. Supplementary Table S3B: a complete list of germline mutated genes significantly associated with aggressive PCa. Supplementary Table ISN4: molecular networks enriched with germline and somatic mutations in indolent PCa. Supplementary Table ISN5: molecular networks enriched with germline and somatic mutations in aggressive PCa. [file 4168784.f1.zip › 4168784.f1/Supp_Table_SA.xlsx]

## Sheet: PROSTATE_SNP_GENES
Supplementary Table SA. A comprehensive list of single nucleotide polymorphisms (herein called genetic variants) and associated genes associated with increased risk of developing prostate cancer, and published GWAS reports denoted by the PubMed ID and actual reference from which the data was extracted.
Gene symbol	SNP_ID	REGION	GWAS P-Value	Data source	PUBMEDID	FIRST AUTHOR	DATE	JOURNAL
2018-03-08	rs76934034	10q11.22	1e-08	GWASTABLE	25217961	Al Olama AA	2014-09-14	Nat Genet
5-HT3C2	rs5855014	3q27.1	3e-06	GWASTABLE	29356057	Du Z	2018-07-03	Prostate
ABLIM1	rs10885582	10q25.3	4e-06	GWASTABLE	22219177	Tao S	2012-01-04	Carcinogenesis
ABLIM1	rs1447295	8q24.21	4e-06	GWASTABLE	22219177	Tao S	2012-03-31	Carcinogenesis
ACOXL	rs3789080	2q13	4e-06	GWASTABLE	22219177	Tao S	2012-01-04	Carcinogenesis
ACOXL	rs7127900	11p15.5	4e-06	GWASTABLE	22219177	Tao S	2012-03-31	Carcinogenesis
ACTBL2	rs10940579	5q11.2	4e-06	GWASTABLE	22219177	Tao S	2012-01-04	Carcinogenesis
ACTBL2	rs4962416	10q26.13	4e-06	GWASTABLE	22219177	Tao S	2012-03-31	Carcinogenesis
ACTC1	rs6983267	8q24.21	4e-06	GWASTABLE	22219177	Tao S	2012-03-31	Carcinogenesis
ACTC1	rs543686	15q14	4e-06	GWASTABLE	22219177	Tao S	2012-01-04	Carcinogenesis
ADAM15	rs1218582	1q21.3	2e-08	GWASTABLE	23535732	Eeles RA	2013-09-16	Nat Genet
ADAMTS12	rs2548035	q35	5.11x10-5	literature	19117981	Sun J, Zheng SL, Wiklund F, Isaacs SD, Li G, Wiley KE. Et al. Sequence variants at 22q13 are associated with prostate cancer risk. Cancer Res. 2009 Jan 1;69(1):10-5.
ADCY5	rs11708067	3q21.1	0.03	literature	23193118	Machiela MJ, Lindstr≈m S, Allen NE, Haiman CA, Albanes D, Barricarte A, et al. Association of type 2 diabetes susceptibility variants with advanced prostate cancer risk in the Breast and Prostate Cancer Cohort Consortium. Am J Epidemiol. 2012 Dec 15;176(12):1121-9.
ADGRG1	rs11859370	16q21	2e-10	GWASTABLE	29892016	Schumacher FR	2018-08-14	Nat Genet
ADGRG1	rs11863709	16q21	2e-11	GWASTABLE	29892016	Schumacher FR	2018-08-14	Nat Genet
ADH5P2	rs1340678	1p31.1	4e-06	GWASTABLE	29356057	Du Z	2018-07-03	Prostate
ADIPOR1P2	rs8023057	14q32.13	2e-15	GWASTABLE	28139693	Hoffmann TJ	2017-05-25	Nat Commun
ADNP	rs12480328	20q13.13	5e-11	GWASTABLE	25217961	Al Olama AA	2014-09-14	Nat Genet
AFM	rs1894292	4q13.3	5e-15	GWASTABLE	29892016	Schumacher FR	2018-08-14	Nat Genet
AKAP8P1	rs2151715	9p23	3e-06	GWASTABLE	29356057	Du Z	2018-07-03	Prostate
AKR1C3	rs4881400	10p15-p14	0.03	literature	22542949	Kwon EM, Holt SK, Fu R, Kolb S, Williams G, Stanford JL, Ostrander EA. Androgen metabolism and JAK/STAT pathway genes and prostate cancer risk. Cancer Epidemiol. 2012 Aug;36(4):347-53.
AMIGO2	rs2711721	12q13.11	2e-06	GWASTABLE	22219177	Tao S	2012-01-04	Carcinogenesis
AMIGO2	rs5759167	22q13.2	2e-06	GWASTABLE	22219177	Tao S	2012-03-31	Carcinogenesis
ANK2	rs10086908	8q24.21	2e-06	GWASTABLE	22219177	Tao S	2012-03-31	Carcinogenesis
ANK2	rs7694725	4q25	2e-06	GWASTABLE	22219177	Tao S	2012-01-04	Carcinogenesis
ANKRD36	rs58488929	2q11.2	6e-06	GWASTABLE	29356057	Du Z	2018-07-03	Prostate
ANP32D	rs4430796	17q12	1e-06	GWASTABLE	22219177	Tao S	2012-03-31	Carcinogenesis
ANP32D	rs4489787	12q13.11	1e-06	GWASTABLE	22219177	Tao S	2012-01-04	Carcinogenesis
ANXA13	rs7127900	11p15.5	4e-06	GWASTABLE	22219177	Tao S	2012-03-31	Carcinogenesis
ANXA13	rs13258681	8q24.13	4e-06	GWASTABLE	22219177	Tao S	2012-01-04	Carcinogenesis
AR	rs5919432	Xq12	1e-08	GWASTABLE	21743467	Kote-Jarai Z	2011-07-10	Nat Genet
ARHGAP6	rs17321482	Xp22.2	2e-13	GWASTABLE	29892016	Schumacher FR	2018-08-14	Nat Genet
ARHGAP6	rs2788524	Xp22.2	9e-11	GWASTABLE	29892016	Schumacher FR	2018-08-14	Nat Genet
ARL15	rs792017	5p15.2	5.4x10-19	literature	18264097	Eeles RA, Kote-Jarai Z, Giles GG, Olama AA, Guy M, Jugurnauth SK, Mulholland S, Leongamornlert DA, et al. Multiple newly identified loci associated with prostate cancer susceptibility. Nat Genet. 2008 Mar;40(3):316-21.
ARMC2	rs2273669	6q21	3e-10	GWASTABLE	29892016	Schumacher FR	2018-08-14	Nat Genet
ARMC4	rs2492906	10p12.1	1e-08	GWASTABLE	28139693	Hoffmann TJ	2017-01-31	Nat Commun
AS1	rs12429206	13q14.3	7e-08	GWASTABLE	28139693	Hoffmann TJ	2017-05-25	Nat Commun
ATF7IP	rs3213764	12p13.1	2e-09	GWASTABLE	23359319	Jin G	2013-01-01	Neoplasia
ATM	rs1800057	11q22.3	8e-09	GWASTABLE	29892016	Schumacher FR	2018-08-14	Nat Genet
ATP5SL	rs11672691	19q13.2	2e-12	GWASTABLE	23065704	Amin Al Olama A	2013-01-10	Hum Mol Genet
B3GAT1	rs878987	11q25	5e-08	GWASTABLE	29892016	Schumacher FR	2018-08-14	Nat Genet
BAI3	rs9351730	6q12	5e-06	GWASTABLE	22219177	Tao S	2012-01-04	Carcinogenesis
BAI3	rs9364554	6q25.3	5e-06	GWASTABLE	22219177	Tao S	2012-03-31	Carcinogenesis
BAIAP2L1	rs9649213	7q21.3	1e-06	GWASTABLE	22219177	Tao S	2012-01-04	Carcinogenesis
BAIAP2L1	rs4962416	10q26.13	1e-06	GWASTABLE	22219177	Tao S	2012-03-31	Carcinogenesis
BARX2	rs147520802	11q24.3	3e-06	GWASTABLE	28139693	Hoffmann TJ	2017-05-25	Nat Commun
BCAS1	rs6091758	20q13.2	6e-18	GWASTABLE	29892016	Schumacher FR	2018-08-14	Nat Genet
BCL11A	rs2556375	2p16.1	6e-19	GWASTABLE	28139693	Hoffmann TJ	2017-01-31	Nat Commun
BCL2	rs533722308	18q21.33	1e-08	GWASTABLE	29892016	Schumacher FR	2018-08-14	Nat Genet
BCL2L11	rs11691517	2q13	4e-12	GWASTABLE	29892016	Schumacher FR	2018-08-14	Nat Genet
BCL2L11	rs11691517	2q13	7e-07	GWASTABLE	29892016	Schumacher FR	2018-08-14	Nat Genet
BCL2L11	rs56366063	2q13	1e-08	GWASTABLE	29892016	Schumacher FR	2018-08-14	Nat Genet
BIK	rs5759167	22q13.31	3.01x10-3	literature	19767753	Eeles RA, Kote-Jarai Z, Al Olama AA, Giles GG, Guy M, Severi G, Muir K. et al. Identification of seven new prostate cancer susceptibility loci through a genome-wide association study. Nat Genet. 2009 Oct;41(10):1116-21.
BIK	rs5759167	22q13.31	1.30x10-12	literature	21390317	Lindstrom S, Schumacher F, Siddiq A, Travis RC, Campa D, et al. Characterizing associations and SNP-environment interactions for GWAS-identified prostate cancer risk markers--results from BPC3. PLoS One. 2011 Feb 24;6(2):e17142.
BIK	rs5759167	22q13.31	9.39x10-7	literature	22459122	Tsilidis KK, Travis RC, Appleby PN, Allen NE, Lindstrom S, Schumacher FR, et al. Interactions between genome-wide significant genetic variants and circulating concentrations of insulin-like growth factor 1, sex hormones, and binding proteins in relation to prostate cancer risk in the National Cancer Institute Breast and Prostate Cancer Cohort Consortium. Am J Epidemiol. 2012 May 1;175(9):926-35.
BIK	rs5759167	22q13.2	1e-16	GWASTABLE	25939597	Berndt SI	2015-05-05	Nat Commun
BIK	rs5759167	22q13.2	1e-16	GWASTABLE	25939597	Berndt SI	2016-02-12	Nat Commun
BIK	rs5759167	22q13.2	5e-09	GWASTABLE	26034056	Hoffmann TJ	2016-07-15	Cancer Discov
BIK	rs742134	22q13.31	6e-06	nggri	22923026	Cheng I, Chen GK, Nakagawa H, Evaluating genetic risk for prostate cancer among Japanese and Latinos. 2012 Nov;21(11):2048-58
BIK	rs742134	22q13.31	5.6x10-9	literature	21743057	Schumacher FR, Berndt SI, Siddiq A, Jacobs KB. Et al. Genome-wide association study identifies new prostate cancer susceptibility loci. Hum Mol Genet. 2011 Oct 1;20(19):3867-75.
BIK	rs742134	22q13.2	6e-06	GWASTABLE	21743057	Schumacher FR	2011-07-30	Hum Mol Genet
BIN1	rs6431219	2q14.3	8e-06	GWASTABLE	29356057	Du Z	2018-07-03	Prostate
BMI1P1	rs5919432	Xq12	1e-08	GWASTABLE	21743467	Kote-Jarai Z	2011-08-22	Nat Genet
BMI1P1	rs5919432	Xq12	1e-09	GWASTABLE	29892016	Schumacher FR	2018-08-14	Nat Genet
BMP5	rs3734444	6p12.1	<0.04	literature	22844442	Huang SP, Bao BY, Hour TC, Huang CY, Yu CC, Liu CC, Lee YC, Huang CN, Pao JB, Huang CH. Genetic variants in CASP3, BMP5, and IRS2 genes may influence survival in prostate cancer patients receiving androgen-deprivation therapy. PLoS One. 2012;7(7):e41219.
BMPR1A	rs11597689	10q22.3	0.03	literature	22844442	Huang SP, Bao BY, Hour TC, Huang CY, Yu CC, Liu CC, Lee YC, Huang CN, Pao JB, Huang CH. Genetic variants in CASP3, BMP5, and IRS2 genes may influence survival in prostate cancer patients receiving androgen-deprivation therapy. PLoS One. 2012;7(7):e41219.
BOD1	rs6869841	5q35.2	5e-08	GWAS Database	23535732	Eeles RA1, Olama AA, Benlloch S, Saunders EJ et al. Identification of 23 new prostate cancer susceptibility loci using the iCOGS custom genotyping array. Nat Genet. 2013 Apr;45(4):385-91, 391e1-2. doi: 10.1038/ng.2560.
BOD1	rs6869841	5q35.2	5e-08	GWASTABLE	23535732	Eeles RA	2013-09-16	Nat Genet
BOK	rs3771570	2q37.3	5e-09	GWASTABLE	23535732	Eeles RA	2013-04-01	Nat Genet
BOK	rs3771570	2q37.3	5e-09	GWASTABLE	23535732	Eeles RA	2013-09-16	Nat Genet
BRCA1	rs1799950	17q21.31	0.01	literature	18073375	Duggan D, Zheng SL, Knowlton M, Benitez D, Dimitrov L, Wiklund F, Robbins C. et al. Two genome-wide association studies of aggressive prostate cancer implicate putative prostate tumor suppressor gene DAB2IP. J Natl Cancer Inst. 2007 Dec 19;99(24):1836-44.
BTNL2	rs3129859	6p21.32	1e-12	GWASTABLE	29892016	Schumacher FR	2018-08-14	Nat Genet
BZRAP1-AS1	rs2680708	17q22	2e-08	GWASTABLE	29892016	Schumacher FR	2018-08-14	Nat Genet
C11orf30	rs11290954	11q13.5	7e-13	GWASTABLE	29892016	Schumacher FR	2018-08-14	Nat Genet
C14ORF118	rs3813546	14q24.3	7.42x10-4	literature	21960693	Feng J, Sun J, Kim ST, Lu Y, Wang Z, Zhang Z, Gronberg H, Isaacs WB, Zheng SL, Xu J. A genome-wide survey over the ChIP-on-chip identified androgen receptor-binding genomic regions identifies a novel prostate cancer susceptibility locus at 12q13.13. Cancer Epidemiol Biomarkers Prev. 2011 Nov;20(11):2396-403.
C16orf78	rs8057939 x rs6465657	16q12.1 x 7q21.3	5e-06	GWASTABLE	22219177	Tao S	2012-03-31	Carcinogenesis
C16orf78	rs8057939	16q12.1	5e-06	GWASTABLE	22219177	Tao S	2012-01-04	Carcinogenesis
C18orf34	rs6507016	18q12.1	4e-06	GWASTABLE	22219177	Tao S	2012-01-04	Carcinogenesis
C18orf34	rs6507016 x rs5945619	18q12.1 x Xp11.22	4e-06	GWASTABLE	22219177	Tao S	2012-03-31	Carcinogenesis
C2ORF43	rs13385191	2p24.1	7.5x10-8	literature	22132073	Batra J, Lose F, O'Mara T, Marquart L, Stephens C, Alexander K, Srinivasan S, Eeles RA, Easton DF, Al Olama AA, Kote-Jarai Z, Guy M, Muir K, Lophatananon A, Rahman AA, Neal DE, Hamdy FC, Donovan JL, Chambers S, Gardiner RA, Aitken J, Yaxley J, Kedda MA, Clements JA, Spurdle AB. Association between Prostinogen (KLK15) genetic variants and prostate cancer risk and aggressiveness in Australia and a …
C2orf43	rs13385191	2p24.1	8e-08	nggri	22923026	Cheng I, Chen GK, Nakagawa H, Evaluating genetic risk for prostate cancer among Japanese and Latinos. 2012 Nov;21(11):2048-58
C2ORF43	rs13385191	2p24.1	0.01	literature	22056502	Lindstr≈m S, Schumacher FR, Campa D, Albanes D, Andriole G, Berndt SI, et al. Replication of five prostate cancer loci identified in an Asian population--results from the NCI Breast and Prostate Cancer Cohort Consortium (BPC3). Cancer Epidemiol Biomarkers Prev. 2012 Jan;21(1):212-6.
C2ORF43	rs13385191	2p24.1	0.01	literature	22056501	Lindstr≈m S, Schumacher FR, Campa D, Albanes D, Andriole G. Replication of five prostate cancer loci identified in an Asian population--results from the NCI Breast and Prostate Cancer Cohort Consortium (BPC3). Cancer Epidemiol Biomarkers Prev. 2012 Jan;21(1):212-6.
C2orf43	rs13385191	2p24.1	0.01	literature	21390317	Lindstrom S, Schumacher F, Siddiq A, Travis RC, Campa D, et al. Characterizing associations and SNP-environment interactions for GWAS-identified prostate cancer risk markers--results from BPC3. PLoS One. 2011 Feb 24;6(2):e17142.
C2ORF43	rs13385191	2p24.1	8.60x10-5	literature	22662242	Long QZ, Du YF, Ding XY, Li X, Song WB, Yang Y, Zhang P, Zhou JP, Liu XG. Replication and fine mapping for association of the C2orf43, FOXP4, GPRC6A and RFX6 genes with prostate cancer in the Chinese population. PLoS One. 2012;7(5):e37866.
C2orf43	rs13385191	2p24.1	7.5x10-8	literature	20676098	Takata R, Akamatsu S, Kubo M, Takahashi A et al. Genome-wide association study identifies five new susceptibility loci for prostate cancer in the Japanese population. Nat Genet. 2010 Sep;42(9):751-4.
C2orf43	rs13385191	2p24.1	5e-06	GWASTABLE	26443449	Wang M	2015-10-07	Nat Commun
C2orf43	rs13385191	2p24.1	8e-08	GWASTABLE	20676098	Takata R	2010-09-11	Nat Genet
C2orf43	rs13385191	2p24.1	5e-06	GWASTABLE	26443449	Wang M	2016-06-13	Nat Commun
C2ORF43	rs340623	2p24.1	3.8x10-3	literature	21637779	Haiman CA, Chen GK, Blot WJ, Strom SS, Berndt SI, Kittles RA. Et al. Characterizing genetic risk at known prostate cancer susceptibility loci in African Americans. PLoS Genet. 2011 May;7(5):e1001387.
C2orf48	rs11902236	2p25.1	3e-08	GWASTABLE	23535732	Eeles RA	2013-04-01	Nat Genet
C2orf48	rs11902236	2p25.1	3e-08	GWASTABLE	23535732	Eeles RA	2013-09-16	Nat Genet
C7orf66	rs10277209	7q31.1	4e-06	GWASTABLE	22219177	Tao S	2012-01-04	Carcinogenesis
C7orf66	rs10277209 x rs1859962	7q31.1 x 17q24.3	4e-06	GWASTABLE	22219177	Tao S	2012-03-31	Carcinogenesis
C9orf123	rs12682851	9p24.1	2e-06	GWASTABLE	22219177	Tao S	2012-01-04	Carcinogenesis
C9orf123	rs12682851 x rs1447295	9p24.1 x 8q24.21	2e-06	GWASTABLE	22219177	Tao S	2012-03-31	Carcinogenesis
C9orf3	rs3802458	9q22	4e-06	erdisfanct/nggri	20932654	Kerns SL, Ostrer H, Stock R, Genome-wide association study to identify single nucleotide polymorphisms (SNPs) associated with the development of erectile dysfunction in African-American men after radiotherapy for prostate cancer. 2010 Dec 1;78(5):1292-300.
C9ORF46	rs1535453	9p24.1	6.84x10-5	literature	19117981	Sun J, Zheng SL, Wiklund F, Isaacs SD, Li G, Wiley KE. Et al. Sequence variants at 22q13 are associated with prostate cancer risk. Cancer Res. 2009 Jan 1;69(1):10-5.
CASC17	rs17765344	17q24.3	4e-21	GWASTABLE	25939597	Berndt SI	2016-02-12	Nat Commun
CASC17	rs1859962	17q24.3	3e-10	GWASTABLE	17603485	Gudmundsson J	2008-06-16	Nat Genet
CASC17	rs1859962	17q24.3	1e-06	GWASTABLE	18264097	Eeles RA	2008-06-16	Nat Genet
CASC17	rs1859962	17q24.3	3e-11	GWASTABLE	21743057	Schumacher FR	2011-07-30	Hum Mol Genet
CASC17	rs1859962	17q24.3	8e-09	GWASTABLE	26034056	Hoffmann TJ	2016-07-15	Cancer Discov
CASC17	rs1859962	17q24.3	2e-09	GWASTABLE	26034056	Hoffmann TJ	2016-07-15	Cancer Discov
CASC17	rs1859962	17q24.3	2e-16	GWASTABLE	19767753	Eeles RA	2009-12-29	Nat Genet
CASC17	rs1859962	17q24.3	1e-91	GWASTABLE	29892016	Schumacher FR	2018-08-14	Nat Genet
CASC17	rs8071558	17q24.3	7e-11	GWASTABLE	26034056	Hoffmann TJ	2016-07-15	Cancer Discov
CASC19	rs138042437	8q24.21	2e-08	GWASTABLE	27262462	Teerlink CC	2016-06-04	Hum Genet
CASC19	rs138042437	8q24.21	2e-08	GWASTABLE	27262462	Teerlink CC	2017-02-03	Hum Genet
CASC21	rs16902094	8q24.21	6e-15	GWASTABLE	19767754	Gudmundsson J	2009-10-05	Nat Genet
CASC21	rs16902104	8q24.21	5e-10	GWASTABLE	26034056	Hoffmann TJ	2016-07-15	Cancer Discov
CASC21	rs16902104	8q24.21	1e-09	GWASTABLE	26034056	Hoffmann TJ	2016-07-15	Cancer Discov
CASC21	rs445114	8q24.21	5e-10	GWASTABLE	19767754	Gudmundsson J	2009-10-05	Nat Genet
CASC21	rs445114	8q24.21	5e-07	GWASTABLE	21743057	Schumacher FR	2011-07-30	Hum Mol Genet
CASC5	rs4924487	15q15.1	1e-08	GWASTABLE	29892016	Schumacher FR	2018-08-14	Nat Genet
CASC8	rs10505477	8q24.21	9e-09	GWASTABLE	24740154	Lange EM	2014-11-09	PLoS One
CASC8	rs1447295	8q24.21	2e-14	GWASTABLE	17401363	Yeager M	2008-06-16	Nat Genet
CASC8	rs1447295	8q24.21	6e-18	GWASTABLE	17401366	Gudmundsson J	2008-06-16	Nat Genet
CASC8	rs1447295	8q24.21	2e-19	GWASTABLE	19767754	Gudmundsson J	2009-10-05	Nat Genet
CASC8	rs1447295	8q24.21	6e-18	GWASTABLE	24753544	Knipe DW	2014-11-07	Cancer Epidemiol Biomarkers Prev
CASC8	rs1447295	8q24.21	1e-179	GWASTABLE	29892016	Schumacher FR	2018-08-14	Nat Genet
CASC8	rs17464492	8q24.21	2e-10	GWASTABLE	28139693	Hoffmann TJ	2017-05-25	Nat Commun
CASC8	rs4242382	8q24.21	3e-19	GWASTABLE	18264096	Thomas G	2008-06-16	Nat Genet
CASC8	rs4242382	8q24.21	1e-34	GWASTABLE	25939597	Berndt SI	2016-02-12	Nat Commun
CASC8	rs4242384	8q24.21	3e-16	GWASTABLE	18264097	Eeles RA	2008-06-16	Nat Genet
CASC8	rs4242384	8q24.21	3e-16	GWASTABLE	21743057	Schumacher FR	2011-07-30	Hum Mol Genet
CASC8	rs4506170	8q24.21	2e-09	GWASTABLE	27262462	Teerlink CC	2016-06-04	Hum Genet
CASC8	rs4506170	8q24.21	2e-09	GWASTABLE	27262462	Teerlink CC	2017-02-03	Hum Genet
CASC8	rs4871796	8q24.21	4e-06	GWASTABLE	28139693	Hoffmann TJ	2017-05-25	Nat Commun
CASC8	rs6983267	8q24.21	9e-13	GWASTABLE	17401363	Yeager M	2008-06-16	Nat Genet
CASC8	rs6983267	8q24.21	9e-13	GWASTABLE	18264097	Eeles RA	2008-06-16	Nat Genet
CASC8	rs6983267	8q24.21	7e-12	GWASTABLE	18264096	Thomas G	2008-06-16	Nat Genet
CASC8	rs6983267	8q24.21	9e-06	GWASTABLE	21743057	Schumacher FR	2011-07-30	Hum Mol Genet
CASC8	rs6983267	8q24.21	4e-10	GWASTABLE	25939597	Berndt SI	2016-02-12	Nat Commun
CASC8	rs6983267	8q24.21	1e-08	GWASTABLE	24740154	Lange EM	2014-11-09	PLoS One
CASC8	rs10090154	8q24.21	3e-06	GWASTABLE	22923026	Cheng I	2012-10-23	Cancer Epidemiol Biomarkers Prev
CASC8	rs11986220	8q24.21	9e-07	GWASTABLE	26034056	Hoffmann TJ	2016-07-15	Cancer Discov
CASC8	rs11986220	8q24.21	2e-40	GWASTABLE	26034056	Hoffmann TJ	2016-07-15	Cancer Discov
CASC8	rs11986220	8q24.21	4e-45	GWASTABLE	26034056	Hoffmann TJ	2016-07-15	Cancer Discov
CASC8	rs4242384	8q24.21	2e-24	GWASTABLE	19767753	Eeles RA	2009-12-29	Nat Genet
CASCA	rs7837688	8q24.21	1e-25	GWASTABLE	20676098	Takata R	2010-09-11	Nat Genet
CASP3	rs4862396	4q34	0.04	literature	22844442	Huang SP, Bao BY, Hour TC, Huang CY, Yu CC, Liu CC, Lee YC, Huang CN, Pao JB, Huang CH. Genetic variants in CASP3, BMP5, and IRS2 genes may influence survival in prostate cancer patients receiving androgen-deprivation therapy. PLoS One. 2012;7(7):e41219.
CASP8	rs59308963	2q33.1	2e-08	GWASTABLE	29892016	Schumacher FR	2018-08-14	Nat Genet
CCAT2	rs6983267	8q24.21	3e-24	GWASTABLE	26034056	Hoffmann TJ	2016-07-15	Cancer Discov
CCAT2	rs6983267	8q24.21	3e-27	GWASTABLE	26034056	Hoffmann TJ	2016-07-15	Cancer Discov
CCDC88C	rs17127296	14q32.12	9.00x10-5	literature	19117981	Sun J, Zheng SL, Wiklund F, Isaacs SD, Li G, Wiley KE. Et al. Sequence variants at 22q13 are associated with prostate cancer risk. Cancer Res. 2009 Jan 1;69(1):10-5.
CCHCR1	rs130067	6p21.3	3.2x10-8	literature	18708398	Kote-Jarai Z, Easton DF, Stanford JL, Ostrander EA, Schleutker J, Ingles SA, et al. Multiple novel prostate cancer predisposition loci confirmed by an international study: the PRACTICAL Consortium. Cancer Epidemiol Biomarkers Prev. 2008 Aug;17(8):2052-61.
CCHCR1	rs130067	6p21.33	3e-08	GWASTABLE	21743467	Kote-Jarai Z	2011-07-10	Nat Genet
CCHCR1	rs130067	6p21.33	3e-08	GWASTABLE	21743467	Kote-Jarai Z	2011-08-22	Nat Genet
CCHCR1	rs130067	6p21.33	2e-07	GWASTABLE	29892016	Schumacher FR	2018-08-14	Nat Genet
CD180	rs7717572	5q13.1 x 3p12.1	3e-06	GWASTABLE	22219177	Tao S	2012-01-04	Carcinogenesis
CD180	rs7717572 x rs2660753	5q13.1 x 3p12.1	3e-06	GWASTABLE	22219177	Tao S	2012-03-31	Carcinogenesis
CD200R1L	rs1002979 x rs12621278	3q13.2 x 2q31.1	3e-06	GWASTABLE	22219177	Tao S	2012-03-31	Carcinogenesis
CD200R1L	rs1002979	3q13.2 x 2q31.1	3e-06	GWASTABLE	22219177	Tao S	2012-01-04	Carcinogenesis
CDCA7	rs34925593	2q31.1	3e-08	GWASTABLE	29892016	Schumacher FR	2018-08-14	Nat Genet
CDH13	rs11861609	16q23.3	0.0007	literature	19767753	Eeles RA, Kote-Jarai Z, Al Olama AA, Giles GG, Guy M, Severi G, Muir K, Identification of seven new prostate cancer susceptibility loci through a genome-wide association study. Nat Genet. 2009 Oct;41(10):1116-21.
CDH13	rs4782780	16q23.3	1.1x10-6	literature	19767753	Eeles RA, Kote-Jarai Z, Al Olama AA, Giles GG, Guy M, Severi G, Muir K, Identification of seven new prostate cancer susceptibility loci through a genome-wide association study. Nat Genet. 2009 Oct;41(10):1116-21.
CDKAL1	rs12198220	6p22.3	2e-07	GWASTABLE	25939597	Berndt SI	2015-05-05	Nat Commun
CDKAL1	rs12198220	6p22.3	2e-07	GWASTABLE	25939597	Berndt SI	2016-02-12	Nat Commun
CDKN1B	rs2066827	12p13.1	2e-09	GWASTABLE	29892016	Schumacher FR	2018-08-14	Nat Genet
CDKN2A	rs10811661	9p21	0.04	literature	23193118	Machiela MJ, Lindstr≈m S, Allen NE, Haiman CA, Albanes D, Barricarte A, et al. Association of type 2 diabetes susceptibility variants with advanced prostate cancer risk in the Breast and Prostate Cancer Cohort Consortium. Am J Epidemiol. 2012 Dec 15;176(12):1121-9.
CDKN2B	rs17694493	9p21.3	1e-06	GWASTABLE	25217961	Al Olama AA	2014-09-14	Nat Genet
CDKN2B	rs17694493	9p21.3	1e-06	GWASTABLE	25217961	Al Olama AA	2015-05-07	Nat Genet
CDKN2B	rs17694493	9p21.3	4e-08	GWASTABLE	25217961	Al Olama AA	2015-05-07	Nat Genet
CDKN2B	rs17694493	9p21.3	2e-10	GWASTABLE	29892016	Schumacher FR	2018-08-14	Nat Genet
CDYL	rs79774606	6p25.1	9e-06	GWASTABLE	29356057	Du Z	2018-07-03	Prostate
CEP152	rs784411 x rs12418451	15q21.1 x 11q13.3	1e-07	GWASTABLE	22219177	Tao S	2012-03-31	Carcinogenesis
CEP152	rs784411	15q21.1 x 11q13.3	1e-07	GWASTABLE	22219177	Tao S	2012-01-04	Carcinogenesis
CHD3	rs28441558	17p13.1	1e-16	GWASTABLE	29892016	Schumacher FR	2018-08-14	Nat Genet
CHEK2	rs78554043	22q12.1	8e-10	GWASTABLE	29117387	Conti DV	2017-08-01	J Natl Cancer Inst
CHEK2	rs78554043	22q12.1	8e-10	GWASTABLE	29117387	Conti DV	2017-11-24	J Natl Cancer Inst
CHL1	rs12485321 x rs6465657	3p26.3 x 7q21.3	3e-06	GWASTABLE	22219177	Tao S	2012-03-31	Carcinogenesis
CHL1	rs12485321	3p26.3 x 7q21.3	3e-06	GWASTABLE	22219177	Tao S	2012-01-04	Carcinogenesis
CHMP2B	rs2660753	3p12.1	0.007	literature	22549899	Bensen JT, Xu Z, Smith GJ, Mohler JL, Fontham ET, Taylor JA. Genetic polymorphism and prostate cancer aggressiveness: a case-only study of 1,536 GWAS and candidate SNPs in African-Americans and European-Americans. Prostate. 2013 Jan;73(1):11-22.
CHST9	rs6983561	18q12.1	0.003	literature	21557267	Liu M, Suzuki M, Arai T, Sawabe M, Enomoto Y, Nishimatsu H, Kume H, Homma Y, Kitamura T. A replication study examining three common single-nucleotide polymorphisms and the risk of prostate cancer in a Japanese population. Prostate. 2011 Jul;71(10):1023-32.
CLDN11	rs10936632	3q26.2	7e-22	GWASTABLE	21743467	Kote-Jarai Z	2011-07-10	Nat Genet
CLDN11	rs10936632	3q26.2	7e-22	GWASTABLE	21743467	Kote-Jarai Z	2011-08-22	Nat Genet
CLVS2	rs13192613 x rs11649743	6q22.31 x 17q12	3e-06	GWASTABLE	22219177	Tao S	2012-03-31	Carcinogenesis
CNGB3	rs4961199	8q21.3	2.79x10-2	literature	18264096	Thomas G, Jacobs KB, Yeager M, Kraft P, Wacholder S, Orr N, Yu K, Chatterjee N, et al. Multiple loci identified in a genome-wide association study of prostate cancer. Nat Genet. 2008 Mar;40(3):310-5.
CNNM2	rs3850699	10q24.32	5e-10	GWASTABLE	23535732	Eeles RA	2013-04-01	Nat Genet
CNNM2	rs3850699	10q24.32	5e-10	GWASTABLE	23535732	Eeles RA	2013-09-16	Nat Genet
CNTN6	rs6763848	3p26.3 x 22q13.1	4e-06	GWASTABLE	22219177	Tao S	2012-01-04	Carcinogenesis
CNTN6	rs6763848 x rs9623117	3p26.3 x 22q13.1	4e-06	GWASTABLE	22219177	Tao S	2012-03-31	Carcinogenesis
COL23A1	rs4976790	5q35.3	7e-09	GWASTABLE	29892016	Schumacher FR	2018-08-14	Nat Genet
COL6A3	rs7584330	2q37.3	3e-09	GWASTABLE	21743467	Kote-Jarai Z	2011-08-22	Nat Genet
COMMD3	rs116940348	10p12.31	1e-14	GWAS Database	28139693	Hoffmann TJ1,2, Passarelli MN1, Graff RE1, Emami NC1, Sakoda LC3, Jorgenson E3, Habel LA3, Shan J3, Ranatunga DK3, Quesenberry CP3, Chao CR4, Ghai NR4, Aaronson D5, Presti J5, Nordström T6, Wang Z7, Berndt SI7, Chanock SJ7, Mosley JD8, Klein RJ9,10,11,12, Middha M9,10,11,12, Lilja H10,11,12, Melander O13, Kvale MN2, Kwok PY2, Schaefer C3, Risch N1,2,3, Van Den Eeden SK3,14, Witte JS1,2,14. Genome…
COMMD3	rs116940348	10p12.31	1e-14	GWASTABLE	28139693	Hoffmann TJ	2017-05-25	Nat Commun
COX18	rs10009409	4q13.3	2e-10	GWASTABLE	25217961	Al Olama AA	2014-09-14	Nat Genet
COX18	rs10009409	4q13.3	2e-10	GWASTABLE	25217961	Al Olama AA	2015-05-07	Nat Genet
COX18	rs1894292	4q13.3	5e-13	GWASTABLE	23535732	Eeles RA	2013-04-01	Nat Genet
COX18	rs1894292	4q13.3	5e-13	GWASTABLE	23535732	Eeles RA	2013-09-16	Nat Genet
CPNE3	rs4961199	8q21	0.01	literature	21390317	Lindstrom S, Schumacher F, Siddiq A, Travis RC, Campa D, et al. Characterizing associations and SNP-environment interactions for GWAS-identified prostate cancer risk markers--results from BPC3. PLoS One. 2011 Feb 24;6(2):e17142.
CPNE3	rs4961199	8q21	2.79x10-2	literature	18264096	Thomas G, Jacobs KB, Yeager M, Kraft P, Wacholder S, Orr N, Yu K, Chatterjee N, et al. Multiple loci identified in a genome-wide association study of prostate cancer. Nat Genet. 2008 Mar;40(3):310-5.
CPVL	rs6979813	7p14.3	6e-06	GWASTABLE	29356057	Du Z	2018-07-03	Prostate
CTBP2	rs4962416	10q26.13	1.05x10-7	literature	21372204	Ciampa J, Yeager M, Amundadottir L, Jacobs K, Kraft P, Chung C, et al. Large-scale exploration of gene-gene interactions in prostate cancer using a multistage genome-wide association study. Cancer Res. 2011 May 1;71(9):3287-95.
CTBP2	rs4962416	10q26.13	0.03	literature	20460480	Gallagher DJ, Vijai J, Cronin AM, Bhatia J, Vickers AJ. Et al. Susceptibility loci associated with prostate cancer progression and mortality. Clin Cancer Res. 2010 May 15;16(10):2819-32.
CTBP2	rs4962416	10q26.13	7.85x10-3	literature	20564319	Kim ST, Cheng Y, Hsu FC, Jin T, Kader AK, Zheng SL, Isaacs WB, Xu J, Sun J. Prostate cancer risk-associated variants reported from genome-wide association studies: meta-analysis and their contribution to genetic Variation. Prostate. 2010 Dec 1;70(16):1729-38.
CTBP2	rs4962416	10q26.13	2e-07	nggri	21743467	Kote-Jarai Z, Olama AA, Giles GG Seven prostate cancer susceptibility loci identified by a multi-stage genome-wide association study.2011 Jul 10;43(8):785-91
CTBP2	rs4962416	10q26.13	7.92x10-5	literature	21390317	Lindstrom S, Schumacher F, Siddiq A, Travis RC, Campa D, et al. Characterizing associations and SNP-environment interactions for GWAS-identified prostate cancer risk markers--results from BPC3. PLoS One. 2011 Feb 24;6(2):e17142.
CTBP2	rs4962416	10q26.13	0.004	literature	20690139	Liu H, Wang B, Han C. Meta-analysis of genome-wide and replication association studies on prostate cancer. Prostate. 2011 Feb 1;71(2):209-24.
CTBP2	rs4962416	10q26.13	0.05	literature	22459122	Tsilidis KK, Travis RC, Appleby PN, Allen NE, Lindstrom S, Schumacher FR, et al. Interactions between genome-wide significant genetic variants and circulating concentrations of insulin-like growth factor 1, sex hormones, and binding proteins in relation to prostate cancer risk in the National Cancer Institute Breast and Prostate Cancer Cohort Consortium. Am J Epidemiol. 2012 May 1;175(9):926-35.
CTBP2	rs4962416	10q26.13	6.0x10-3	literature	19116992	Wiklund F, Zheng SL, Sun J, Adami HO, Lilja H, Hsu FC, et al. Association of reported prostate cancer risk alleles with PSA levels among men without a diagnosis of prostate cancer. Prostate. 2009 Mar 1;69(4):419-27.
CTBP2	rs4962416	10q26.13	2e-07	GWASTABLE	18264096	Thomas G	2008-02-10	Nat Genet
CTBP2	rs4962416	10q26.13	2e-07	GWASTABLE	18264096	Thomas G	2008-06-16	Nat Genet
CTBP2	rs4962416	10q26.13	2e-11	GWASTABLE	29892016	Schumacher FR	2018-08-14	Nat Genet
CTD	rs12653946	5p15.33	4e-18	GWASTABLE	20676098	Takata R	2010-09-11	Nat Genet
CTD	rs12653946	5p15.33	3e-07	GWASTABLE	22923026	Cheng I	2012-10-23	Cancer Epidemiol Biomarkers Prev
CTDSPL	rs9311171	3p21.3	2e-06	nggri	21743467	Kote-Jarai Z, Olama AA, Giles GG Seven prostate cancer susceptibility loci identified by a multi-stage genome-wide association study.2011 Jul 10;43(8):785-91
CTDSPL	rs9311171	3p22.2	2e-06	GWASTABLE	17903305	Murabito JM	2007-09-19	BMC Med Genet
CTDSPL	rs9311171	3p22.2	2e-06	GWASTABLE	17903305	Murabito JM	2008-09-17	BMC Med Genet
CWC22	rs16867225 x rs1859962	2q31.3 x 17q24.3	3e-06	GWASTABLE	22219177	Tao S	2012-03-31	Carcinogenesis
CWC22	rs16867225 x rs1859962	2q31.3 x 17q24.3	3e-06	GWASTABLE	22219177	Tao S	2012-01-04	Carcinogenesis
CXorf67	rs1327301	Xp11.22	2e-10	GWASTABLE	19767753	Eeles RA	2009-12-29	Nat Genet
CYP17A1	rs10786712	10q24.3	0.03	literature	22542949	Kwon EM, Holt SK, Fu R, Kolb S, Williams G, Stanford JL, Ostrander EA. Androgen metabolism and JAK/STAT pathway genes and prostate cancer risk. Cancer Epidemiol. 2012 Aug;36(4):347-53.
CYP21A2	rs3096702	6p21.32	5e-09	GWASTABLE	23535732	Eeles RA	2013-04-01	Nat Genet
DAB21P	rs1571801	9p21	2.01x10-3	literature	21372204	Ciampa J, Yeager M, Amundadottir L, Jacobs K, Kraft P, Chung C, et al. Large-scale exploration of gene-gene interactions in prostate cancer using a multistage genome-wide association study. Cancer Res. 2011 May 1;71(9):3287-95.
DAB21P	rs1571801	9p21	1.46x10-3	literature	18073375	Duggan D, Zheng SL, Knowlton M, Benitez D, Dimitrov L, Wiklund F, Robbins C. et al. Two genome-wide association studies of aggressive prostate cancer implicate putative prostate tumor suppressor gene DAB2IP. J Natl Cancer Inst. 2007 Dec 19;99(24):1836-44.
DAB2IP	rs1571801		0.03	literature	22077888	McGuire BB, Helfand BT, Kundu S, Hu Q, Banks JA, Cooper P, Catalona WJ. Association of prostate cancer risk alleles with unfavourable pathological characteristics in potential candidates for active surveillance. BJU Int. 2012 Aug;110(3):338-43.
DBIL5P	rs684232	17p13.3	5e-15	GWASTABLE	23535732	Eeles RA	2013-04-01	Nat Genet
DDHD1	rs8008270	14q22.1	2e-14	GWASTABLE	23535732	Eeles RA	2013-04-01	Nat Genet
DDHD1	rs8008270	14q22.1	2e-14	GWASTABLE	23535732	Eeles RA	2013-09-16	Nat Genet
DENND4B	rs34579442	1q21.3	5e-14	GWASTABLE	29892016	Schumacher FR	2018-08-14	Nat Genet
DENND4B	rs34579442	1q21.3	8e-07	GWASTABLE	29892016	Schumacher FR	2018-08-14	Nat Genet
DERL1	rs13259131	8q24.13	5.25x10-5	literature	21960693	Feng J, Sun J, Kim ST, Lu Y, Wang Z, Zhang Z, Gronberg H, Isaacs WB, Zheng SL, Xu J. A genome-wide survey over the ChIP-on-chip identified androgen receptor-binding genomic regions identifies a novel prostate cancer susceptibility locus at 12q13.13. Cancer Epidemiol Biomarkers Prev. 2011 Nov;20(11):2396-403.
DGKK	rs140659849	Xp11.22	1e-07	GWASTABLE	26307654	Szulkin R	2016-08-22	Cancer Epidemiol Biomarkers Prev
DLEU1	rs202346	13q14.3	3e-22	GWASTABLE	28139693	Hoffmann TJ	2017-01-31	Nat Commun
DLEU1	rs202346	13q14.3	3e-22	GWASTABLE	28139693	Hoffmann TJ	2017-05-25	Nat Commun
DLEU1	rs9596300	13q14.3	1e-08	GWASTABLE	28139693	Hoffmann TJ	2017-05-25	Nat Commun
DNAH12	rs1916284 x rs12418451	3p14.3 x 11q13.3	1e-06	GWASTABLE	22219177	Tao S	2012-01-04	Carcinogenesis
DNAH12	rs1916284 x rs12418451	3p14.3 x 11q13.3	1e-06	GWASTABLE	22219177	Tao S	2012-03-31	Carcinogenesis
DNAH5	rs4463179 x rs887391	5p15.2 x 19q13.2	2e-06	GWASTABLE	22219177	Tao S	2012-01-04	Carcinogenesis
DNAH5	rs4463179 x rs887391	5p15.2 x 19q13.2	2e-06	GWASTABLE	22219177	Tao S	2012-03-31	Carcinogenesis
DNMT3B	rs11480453	20q11.21	3e-08	GWASTABLE	29892016	Schumacher FR	2018-08-14	Nat Genet
DOCK2	rs76551843	5q35.1	2e-08	GWASTABLE	29892016	Schumacher FR	2018-08-14	Nat Genet
DPF1	rs8102476	19q13.2	2e-11	GWASTABLE	19767754	Gudmundsson J	2009-10-05	Nat Genet
DPF1	rs8102476	19q13.2	9e-30	GWASTABLE	29892016	Schumacher FR	2018-08-14	Nat Genet
DUBR	rs1283104	3q13.12	9e-09	GWASTABLE	29892016	Schumacher FR	2018-08-14	Nat Genet
EBF2	rs11135910	8p21.2	8e-11	GWASTABLE	23535732	Eeles RA	2013-04-01	Nat Genet
EBF2	rs11135910	8p21.2	8e-11	GWASTABLE	23535732	Eeles RA	2013-09-16	Nat Genet
EBF2	rs11135910	8p21.2	9e-13	GWASTABLE	29892016	Schumacher FR	2018-08-14	Nat Genet
EEFSEC	rs10934853	3q21.3	0.001	literature	19767754	Gudmundsson J, Sulem P, Gudbjartsson DF, Blondal T, Gylfason A, Agnarsson BA. Et al. Genome-wide association and replication studies identify four variants associated with prostate cancer susceptibility. Nat Genet. 2009 Oct;41(10):1122-6.
EEFSEC	rs10934853	3q21.3	7.43x10-5	literature	20564319	Kim ST, Cheng Y, Hsu FC, Jin T, Kader AK, Zheng SL, Isaacs WB, Xu J, Sun J. Prostate cancer risk-associated variants reported from genome-wide association studies: meta-analysis and their contribution to genetic Variation. Prostate. 2010 Dec 1;70(16):1729-38.
EEFSEC	rs10934853	3q21.3	3e-10	nggri	21743057	Schumacher FR, Berndt SI, Siddiq A, Genome-wide association study identifies new prostate cancer susceptibility loci. 2011 Oct 1;20(19):3867-75.
EEFSEC	rs10934853	3q21.3	3e-10	GWASTABLE	19767754	Gudmundsson J	2009-10-05	Nat Genet
EEFSEC	rs10934853	3q21.3	1e-29	GWASTABLE	29892016	Schumacher FR	2018-08-14	Nat Genet
EEFSEC	rs4857841	3q21.3	6.79x10-6	literature	21372204	Ciampa J, Yeager M, Amundadottir L, Jacobs K, Kraft P, Chung C, et al. Large-scale exploration of gene-gene interactions in prostate cancer using a multistage genome-wide association study. Cancer Res. 2011 May 1;71(9):3287-95.
EEFSEC	rs4857841	3q21.3	3.30x10-3	literature	19767754	Gudmundsson J, Sulem P, Gudbjartsson DF, Blondal T, Gylfason A, Agnarsson BA. Et al. Genome-wide association and replication studies identify four variants associated with prostate cancer susceptibility. Nat Genet. 2009 Oct;41(10):1122-6.
EEFSEC	rs4857841	3q21.3	2.32x10-8	literature	21390317	Lindstrom S, Schumacher F, Siddiq A, Travis RC, Campa D, et al. Characterizing associations and SNP-environment interactions for GWAS-identified prostate cancer risk markers--results from BPC3. PLoS One. 2011 Feb 24;6(2):e17142.
EEFSEC	rs4857841	3q21.3	0.001	literature	22459122	Tsilidis KK, Travis RC, Appleby PN, Allen NE, Lindstrom S, Schumacher FR, et al. Interactions between genome-wide significant genetic variants and circulating concentrations of insulin-like growth factor 1, sex hormones, and binding proteins in relation to prostate cancer risk in the National Cancer Institute Breast and Prostate Cancer Cohort Consortium. Am J Epidemiol. 2012 May 1;175(9):926-35.
EHBP1	rs17432497	2p15	6.49x10-3	literature	21372204	Ciampa J, Yeager M, Amundadottir L, Jacobs K, Kraft P, Chung C, et al. Large-scale exploration of gene-gene interactions in prostate cancer using a multistage genome-wide association study. Cancer Res. 2011 May 1;71(9):3287-95.
EHBP1	rs2430386	2p15	9e-12	GWASTABLE	25939597	Berndt SI	2015-05-05	Nat Commun
EHBP1	rs2430386	2p15	9e-12	GWASTABLE	25939597	Berndt SI	2016-02-12	Nat Commun
EHBP1	rs2710646	2p15	2.5x10-3	literature	19767754	Gudmundsson J, Sulem P, Gudbjartsson DF, Blondal T, Gylfason A, Agnarsson BA. Et al. Genome-wide association and replication studies identify four variants associated with prostate cancer susceptibility. Nat Genet. 2009 Oct;41(10):1122-6.
EHBP1	rs2710646	2p15	0.002	literature	20690139	Liu H, Wang B, Han C. Meta-analysis of genome-wide and replication association studies on prostate cancer. Prostate. 2011 Feb 1;71(2):209-24.
EHBP1	rs2710647	2p15	3.56x10-2	literature	19767753	Eeles RA, Kote-Jarai Z, Al Olama AA, Giles GG, Guy M, Severi G, Muir K. et al. Identification of seven new prostate cancer susceptibility loci through a genome-wide association study. Nat Genet. 2009 Oct;41(10):1116-21.
EHBP1	rs2710647	2p15	2.8x10-5	literature	21637779	Haiman CA, Chen GK, Blot WJ, Strom SS, Berndt SI, Kittles RA. Et al. Characterizing genetic risk at known prostate cancer susceptibility loci in African Americans. PLoS Genet. 2011 May;7(5):e1001387.
EHBP1	rs6545977	2p15	5e-07	GWASTABLE	19767753	Eeles RA	2009-09-20	Nat Genet
EHBP1	rs6545977	2p15	5e-07	GWASTABLE	19767753	Eeles RA	2009-12-29	Nat Genet
EHBP1	rs721048	2p15	4.7x10-5	literature	19567509	Breyer JP, McReynolds KM, Yaspan BL, Bradley KM, Dupont WD, Smith JR. Genetic variants and prostate cancer risk: candidate replication and exploration of viral restriction genes. Cancer Epidemiol Biomarkers Prev. 2009 Jul;18(7):2137-44.
EHBP1	rs721048	2p15	0.02	literature	21637779	Haiman CA, Chen GK, Blot WJ, Strom SS, Berndt SI, Kittles RA. Et al. Characterizing genetic risk at known prostate cancer susceptibility loci in African Americans. PLoS Genet. 2011 May;7(5):e1001387.
EHBP1	rs721048	2p15	1.22x10-5	literature	20564319	Kim ST, Cheng Y, Hsu FC, Jin T, Kader AK, Zheng SL, Isaacs WB, Xu J, Sun J. Prostate cancer risk-associated variants reported from genome-wide association studies: meta-analysis and their contribution to genetic Variation. Prostate. 2010 Dec 1;70(16):1729-38.
EHBP1	rs721048	2p15	2.47x10-5	literature	21390317	Lindstrom S, Schumacher F, Siddiq A, Travis RC, Campa D, et al. Characterizing associations and SNP-environment interactions for GWAS-identified prostate cancer risk markers--results from BPC3. PLoS One. 2011 Feb 24;6(2):e17142.
EHBP1	rs721048	2p15	0.04	literature	21756274	Liu F, Hsing AW, Wang X, Shao Q, Qi J, Ye Y, Wang Z, Chen H, Gao X, et al. Systematic confirmation study of reported prostate cancer risk-associated single nucleotide polymorphisms in Chinese men. Cancer Sci. 2011 Oct;102(10):1916-20.
EHBP1	rs721048	2p15	8e-09	nggri	21743057	Schumacher FR, Berndt SI, Siddiq A, Genome-wide association study identifies new prostate cancer susceptibility loci. 2011 Oct 1;20(19):3867-75.
EHBP1	rs721048	2p15	0.02	literature	22459122	Tsilidis KK, Travis RC, Appleby PN, Allen NE, Lindstrom S, Schumacher FR, et al. Interactions between genome-wide significant genetic variants and circulating concentrations of insulin-like growth factor 1, sex hormones, and binding proteins in relation to prostate cancer risk in the National Cancer Institute Breast and Prostate Cancer Cohort Consortium. Am J Epidemiol. 2012 May 1;175(9):926-35.
EHBP1	rs721048	2p15	8e-09	GWASTABLE	18264098	Gudmundsson J	2008-02-10	Nat Genet
EHBP1	rs721048	2p15	8e-09	GWASTABLE	18264098	Gudmundsson J	2008-06-16	Nat Genet
EHBP1	rs721048	2p15	5e-22	GWASTABLE	29892016	Schumacher FR	2018-08-14	Nat Genet
EHF	rs4378355	11p13	2e-10	GWASTABLE	28139693	Hoffmann TJ	2017-01-31	Nat Commun
EHF	rs4378355	11p13	2e-10	GWASTABLE	28139693	Hoffmann TJ	2017-05-25	Nat Commun
EIF2S3	rs6627995	Xp22.11	1e-13	GWASTABLE	28139693	Hoffmann TJ	2017-01-31	Nat Commun
ELA2A	rs2901964	1p36.21	5e-06	erdisfanct/nggri	20932654	Kerns SL, Ostrer H, Stock R, Genome-wide association study to identify single nucleotide polymorphisms (SNPs) associated with the development of erectile dysfunction in African-American men after radiotherapy for prostate cancer. 2010 Dec 1;78(5):1292-300.
ELAC2	rs11545302	17p11.2	1.0x10-5	literature	20086112	Beuten J, Gelfond JA, Franke JL, Shook S, Johnson-Pais TL, Thompson IM, Leach RJ. Single and multivariate associations of MSR1, ELAC2, and RNASEL with prostate cancer in an ethnic diverse cohort of men. Cancer Epidemiol Biomarkers Prev. 2010 Feb;19(2):588-99.
ELAC2	rs17552022	17p11.2	0.03	literature	20086112	Beuten J, Gelfond JA, Franke JL, Shook S, Johnson-Pais TL, Thompson IM, Leach RJ. Single and multivariate associations of MSR1, ELAC2, and RNASEL with prostate cancer in an ethnic diverse cohort of men. Cancer Epidemiol Biomarkers Prev. 2010 Feb;19(2):588-99.
EPHA10	rs731174 x rs4430796	1p34.3 x 17q12	5e-06	GWASTABLE	22219177	Tao S	2012-01-04	Carcinogenesis
EPHA10	rs731174 x rs4430796	1p34.3 x 17q12	5e-06	GWASTABLE	22219177	Tao S	2012-03-31	Carcinogenesis
ERG	rs2836370	21q22.3	0.01	literature	22844442	Huang SP, Bao BY, Hour TC, Huang CY, Yu CC, Liu CC, Lee YC, Huang CN, Pao JB, Huang CH. Genetic variants in CASP3, BMP5, and IRS2 genes may influence survival in prostate cancer patients receiving androgen-deprivation therapy. PLoS One. 2012;7(7):e41219.
ESR2	rs58262369	14q23.2	6e-10	GWAS Database	26443449	Wang M1,2,3, Takahashi A4, Liu F et al. Large-scale association analysis in Asians identifies new susceptibility loci for prostate cancer. Nat Commun. 2015 Oct 7;6:8469. doi: 10.1038/ncomms9469.
ESR2	rs58262369	14q23.2	6e-10	GWASTABLE	26443449	Wang M	2016-06-13	Nat Commun
EVC	rs735172 x rs887391	4p16.2 x 19q13.2	2e-06	GWASTABLE	22219177	Tao S	2012-03-31	Carcinogenesis
EVC x PPP1R14A	rs735172 x rs887391	4p16.2 x 19q13.2	2e-06	GWASTABLE	22219177	Tao S	2012-01-04	Carcinogenesis
FAM111A-FAM111B	rs1938781	11q12.1	1.10x10-10	literature	22366784	Akamatsu S, Takata R, Haiman CA, Takahashi A, Inoue T, et al. Common variants at 11q12, 10q26 and 3p11.2 are associated with prostate cancer susceptibility in Japanese. Nat Genet. 2012 Feb 26;44(4):426-9.
FAM124A	rs10492519	13q14.3	5.6x10-6	literature	18073375	Duggan D, Zheng SL, Knowlton M, Benitez D, Dimitrov L, Wiklund F, Robbins C. et al. Two genome-wide association studies of aggressive prostate cancer implicate putative prostate tumor suppressor gene DAB2IP. J Natl Cancer Inst. 2007 Dec 19;99(24):1836-44.
FAM60DP	rs142463603	8p21.2	4e-16	GWASTABLE	26034056	Hoffmann TJ	2016-07-15	Cancer Discov
FAM82A1	rs6741148	2p22.2	4e-06	erdisfanct/nggri	20932654	Kerns SL, Ostrer H, Stock R, Genome-wide association study to identify single nucleotide polymorphisms (SNPs) associated with the development of erectile dysfunction in African-American men after radiotherapy for prostate cancer. 2010 Dec 1;78(5):1292-300.
FAM84B	rs10505476	8q24.13	0.04	literature	22549899	Bensen JT, Xu Z, Smith GJ, Mohler JL, Fontham ET, Taylor JA. Genetic polymorphism and prostate cancer aggressiveness: a case-only study of 1,536 GWAS and candidate SNPs in African-Americans and European-Americans. Prostate. 2013 Jan;73(1):11-22.
FAM84B	rs13254738	8q24.13	0.03	literature	22549899	Bensen JT, Xu Z, Smith GJ, Mohler JL, Fontham ET, Taylor JA. Genetic polymorphism and prostate cancer aggressiveness: a case-only study of 1,536 GWAS and candidate SNPs in African-Americans and European-Americans. Prostate. 2013 Jan;73(1):11-22.
FAM84B	rs1456305	8q24.13	0.04	literature	22549899	Bensen JT, Xu Z, Smith GJ, Mohler JL, Fontham ET, Taylor JA. Genetic polymorphism and prostate cancer aggressiveness: a case-only study of 1,536 GWAS and candidate SNPs in African-Americans and European-Americans. Prostate. 2013 Jan;73(1):11-22.
FAM84B	rs2293850	8q24.13	0.01	literature	22549899	Bensen JT, Xu Z, Smith GJ, Mohler JL, Fontham ET, Taylor JA. Genetic polymorphism and prostate cancer aggressiveness: a case-only study of 1,536 GWAS and candidate SNPs in African-Americans and European-Americans. Prostate. 2013 Jan;73(1):11-22.
FAM84B	rs6993569	8q24.13	0.03	literature	22549899	Bensen JT, Xu Z, Smith GJ, Mohler JL, Fontham ET, Taylor JA. Genetic polymorphism and prostate cancer aggressiveness: a case-only study of 1,536 GWAS and candidate SNPs in African-Americans and European-Americans. Prostate. 2013 Jan;73(1):11-22.
FARP2	rs3771570	2q37.3	5.22x10-9	literature	23535732	Eeles RA, Olama AA, Benlloch S, Saunders EJ, Leongamornlert DA, Tymrakiewicz M, et al. Identification of 23 new prostate cancer susceptibility loci using the iCOGS custom genotyping array. Nat Genet. 2013 Apr;45(4):385-91.
FARP2	rs3771570	2q37.3	1e-14	GWASTABLE	29892016	Schumacher FR	2018-08-14	Nat Genet
FBRSL1	rs111599055	12q24.33	8e-08	GWASTABLE	29892016	Schumacher FR	2018-08-14	Nat Genet
FBRSL1	rs111599055	12q24.33	1e-08	GWASTABLE	29892016	Schumacher FR	2018-08-14	Nat Genet
FBRSL1	rs7295014	12q24.33	1e-09	GWASTABLE	29892016	Schumacher FR	2018-08-14	Nat Genet
FBRSL1	rs7295014	12q24.33	6e-08	GWASTABLE	29892016	Schumacher FR	2018-08-14	Nat Genet
FBXO34	rs8015211	14q22.1	1.64x10-5	literature	21467234	FitzGerald LM, Kwon EM, Conomos MP, Kolb S, Holt SK, Levine D, Feng Z, Ostrander EA, Stanford JL. Genome-wide association study identifies a genetic variant associated with risk for more aggressive prostate cancer. Cancer Epidemiol Biomarkers Prev. 2011 Jun;20(6):1196-203.
FCHSD1	rs251177	5q31.3	0.0002	literature	18073375	Duggan D, Zheng SL, Knowlton M, Benitez D, Dimitrov L, Wiklund F, Robbins C. et al. Two genome-wide association studies of aggressive prostate cancer implicate putative prostate tumor suppressor gene DAB2IP. J Natl Cancer Inst. 2007 Dec 19;99(24):1836-44.
FERMT2	rs8008270	14q22.1	1.78x10-14	literature	23535732	Eeles RA, Olama AA, Benlloch S, Saunders EJ, Leongamornlert DA, Tymrakiewicz M, et al. Identification of 23 new prostate cancer susceptibility loci using the iCOGS custom genotyping array. Nat Genet. 2013 Apr;45(4):385-91.
FERMT2	rs8008270	14q22.1	6e-16	GWASTABLE	29892016	Schumacher FR	2018-08-14	Nat Genet
FGF10	rs2121875	5p13-p12	4.0x10-8	literature	18708398	Kote-Jarai Z, Easton DF, Stanford JL, Ostrander EA, Schleutker J, Ingles SA, et al. Multiple novel prostate cancer predisposition loci confirmed by an international study: the PRACTICAL Consortium. Cancer Epidemiol Biomarkers Prev. 2008 Aug;17(8):2052-61.
FGF10	rs2121875	5p13-p12	4e-08	nggri	21743057	Schumacher FR, Berndt SI, Siddiq A, Genome-wide association study identifies new prostate cancer susceptibility loci. 2011 Oct 1;20(19):3867-75.
FGF10	rs2121875	5p12	4e-08	GWASTABLE	21743467	Kote-Jarai Z	2011-07-10	Nat Genet
FGF10	rs2121875	5p12	4e-08	GWASTABLE	21743467	Kote-Jarai Z	2011-08-22	Nat Genet
FGF10	rs2121875	5p12	1e-08	GWASTABLE	29892016	Schumacher FR	2018-08-14	Nat Genet
FGFR2	rs10749415	10q26.13, 10q26.12	4e-43	GWASTABLE	28139693	Hoffmann TJ	2017-01-31	Nat Commun
FGFR2	rs10749415; rs200367988; rs10886902	10q26.13, 10q26.12	3e-11	GWASTABLE	28139693	Hoffmann TJ	2017-05-25	Nat Commun
FGFR2	rs10749415; rs200367988; rs10886902	10q26.13, 10q26.12	4e-18	GWASTABLE	28139693	Hoffmann TJ	2017-05-25	Nat Commun
FGFR2	rs10749415; rs200367988; rs10886902	10q26.13, 10q26.12	1e-35	GWASTABLE	28139693	Hoffmann TJ	2017-05-25	Nat Commun
FGFR2	rs10749415; rs200367988; rs10886902	10q26.13, 10q26.12	4e-43	GWASTABLE	28139693	Hoffmann TJ	2017-05-25	Nat Commun
FGFR2	rs10886902	10q26.12	2e-53	GWASTABLE	28139693	Hoffmann TJ	2017-01-31	Nat Commun
FGFR2	rs10886902	10q26.12	2e-53	GWASTABLE	28139693	Hoffmann TJ	2017-05-25	Nat Commun
FGFR2	rs4752569	10q26.13	1e-11	GWASTABLE	28139693	Hoffmann TJ	2017-05-25	Nat Commun
FLJ40194	rs11650494	17q21.32	9e-12	GWASTABLE	29892016	Schumacher FR	2018-08-14	Nat Genet
FOXP4	rs1983891	6p21.1	7.6x10-8	literature	22132073	Batra J, Lose F, O'Mara T, Marquart L, Stephens C, Alexander K, Srinivasan S, Eeles RA, Easton DF, Al Olama AA, Kote-Jarai Z, Guy M, Muir K, Lophatananon A, Rahman AA, Neal DE, Hamdy FC, Donovan JL, Chambers S, Gardiner RA, Aitken J, Yaxley J, Kedda MA, Clements JA, Spurdle AB. Association between Prostinogen (KLK15) genetic variants and prostate cancer risk and aggressiveness in Australia and a …
FOXP4	rs1983891	6p21.1	0.02	literature	21637779	Haiman CA, Chen GK, Blot WJ, Strom SS, Berndt SI, Kittles RA. Et al. Characterizing genetic risk at known prostate cancer susceptibility loci in African Americans. PLoS Genet. 2011 May;7(5):e1001387.
FOXP4	rs1983891	6p21.1	2.48x10-4	literature	22056501	Lindstr≈m S, Schumacher FR, Campa D, Albanes D, Andriole G. Replication of five prostate cancer loci identified in an Asian population--results from the NCI Breast and Prostate Cancer Cohort Consortium (BPC3). Cancer Epidemiol Biomarkers Prev. 2012 Jan;21(1):212-6.
FOXP4	rs1983891	6p21.1	2.48x10-4	literature	21390317	Lindstrom S, Schumacher F, Siddiq A, Travis RC, Campa D, et al. Characterizing associations and SNP-environment interactions for GWAS-identified prostate cancer risk markers--results from BPC3. PLoS One. 2011 Feb 24;6(2):e17142.
FOXP4	rs1983891	6p21.1	6.22x10-5	literature	22662242	Long QZ, Du YF, Ding XY, Li X, Song WB, Yang Y, Zhang P, Zhou JP, Liu XG. Replication and fine mapping for association of the C2orf43, FOXP4, GPRC6A and RFX6 genes with prostate cancer in the Chinese population. PLoS One. 2012;7(5):e37866.
FOXP4	rs1983891	6p21.1	8e-08	nggri	21743057	Schumacher FR, Berndt SI, Siddiq A, Genome-wide association study identifies new prostate cancer susceptibility loci. 2011 Oct 1;20(19):3867-75.
FOXP4	rs1983891	6p21.1	8e-08	GWASTABLE	20676098	Takata R	2010-08-01	Nat Genet
FOXP4	rs1983891	6p21.1	8e-08	GWASTABLE	20676098	Takata R	2010-09-11	Nat Genet
FREM1	rs1552895	9p22.3	0.002	literature	17876339	Nam RK, Zhang WW, Loblaw DA, Klotz LH, Trachtenberg J, Jewett MA, et al. A genome-wide association screen identifies regions on chromosomes 1q25 and 7p21 as risk loci for sporadic prostate cancer. Prostate Cancer Prostatic Dis. 2008;11(3):241-6.
FSHR	rs2268363	2p21-p16	5e-08	erdisfanct/nggri	20932654	Kerns SL, Ostrer H, Stock R, Genome-wide association study to identify single nucleotide polymorphisms (SNPs) associated with the development of erectile dysfunction in African-American men after radiotherapy for prostate cancer. 2010 Dec 1;78(5):1292-300.
FTO	rs9939609	16q12.2	0.04	literature	23193118	Machiela MJ, Lindstr≈m S, Allen NE, Haiman CA, Albanes D, Barricarte A, et al. Association of type 2 diabetes susceptibility variants with advanced prostate cancer risk in the Breast and Prostate Cancer Cohort Consortium. Am J Epidemiol. 2012 Dec 15;176(12):1121-9.
FYCO1	rs1545985	3p21.3	6.61x10-6	literature	18073375	Duggan D, Zheng SL, Knowlton M, Benitez D, Dimitrov L, Wiklund F, Robbins C. et al. Two genome-wide association studies of aggressive prostate cancer implicate putative prostate tumor suppressor gene DAB2IP. J Natl Cancer Inst. 2007 Dec 19;99(24):1836-44.
FYCO1	rs7652331	3p21.3	4.47x10-4	literature	18073375	Duggan D, Zheng SL, Knowlton M, Benitez D, Dimitrov L, Wiklund F, Robbins C. et al. Two genome-wide association studies of aggressive prostate cancer implicate putative prostate tumor suppressor gene DAB2IP. J Natl Cancer Inst. 2007 Dec 19;99(24):1836-44.
GADD45A	rs3783501	1p31.2	0.03	literature	21373201	Campa D, H?sing A, Stein A, Dostal L, Boeing H, Pischon T, et al. Genetic variability of the mTOR pathway and prostate cancer risk in the European Prospective Investigation on Cancer (EPIC). PLoS One. 2011 Feb 23;6(2):e16914.
GADD45A	rs520820	1p31.2	0.02	literature	21373201	Campa D, H?sing A, Stein A, Dostal L, Boeing H, Pischon T, et al. Genetic variability of the mTOR pathway and prostate cancer risk in the European Prospective Investigation on Cancer (EPIC). PLoS One. 2011 Feb 23;6(2):e16914.
GALNTL6	rs494770	4q34.1	0.01	literature	17876339	Nam RK, Zhang WW, Loblaw DA, Klotz LH, Trachtenberg J, Jewett MA, et al. A genome-wide association screen identifies regions on chromosomes 1q25 and 7p21 as risk loci for sporadic prostate cancer. Prostate Cancer Prostatic Dis. 2008;11(3):241-6.
GBP1P1	rs12095604	1p22.2	5e-06	GWASTABLE	29356057	Du Z	2018-07-03	Prostate
GDF7	rs9306895	2p24.1	3e-21	GWASTABLE	29892016	Schumacher FR	2018-08-14	Nat Genet
GGC	RS10187424	7p15-p14	3.1x10-15	literature	21743467	Kote-Jarai Z, Olama AA, Giles GG, Severi G, Schleutker J, Weischer M, Campa D, et al. Seven prostate cancer susceptibility loci identified by a multi-stage genome-wide association study. Nat Genet. 2011 Jul 10;43(8):785-91.
GGCX	rs10187424	2p11.2	3e-15	GWASTABLE	21743467	Kote-Jarai Z	2011-07-10	Nat Genet
GGCX	rs10187424	2p11.2	3e-15	GWASTABLE	21743467	Kote-Jarai Z	2011-08-22	Nat Genet
GGCX	rs10187424	2p11.2	5e-06	GWASTABLE	26034056	Hoffmann TJ	2016-07-15	Cancer Discov
GGCX	rs10187424	2p11.2	1e-20	GWASTABLE	29892016	Schumacher FR	2018-08-14	Nat Genet
GGCX	rs2028898	2p12	1.08x10-7	literature	22366784	Akamatsu S, Takata R, Haiman CA, Takahashi A, Inoue T, et al. Common variants at 11q12, 10q26 and 3p11.2 are associated with prostate cancer susceptibility in Japanese. Nat Genet. 2012 Feb 26;44(4):426-9.
GGCX	rs10187424	2p11.2	3e-09	GWASTABLE	26034056	Hoffmann TJ	2016-07-15	Cancer Discov
GHR	rs2940919	5p14-p12	3.77x10-4	literature	21960693	Feng J, Sun J, Kim ST, Lu Y, Wang Z, Zhang Z, Gronberg H, Isaacs WB, Zheng SL, Xu J. A genome-wide survey over the ChIP-on-chip identified androgen receptor-binding genomic regions identifies a novel prostate cancer susceptibility locus at 12q13.13. Cancer Epidemiol Biomarkers Prev. 2011 Nov;20(11):2396-403.
GHR	rs2940920	5p14-p12	3.76x10-4	literature	21960693	Feng J, Sun J, Kim ST, Lu Y, Wang Z, Zhang Z, Gronberg H, Isaacs WB, Zheng SL, Xu J. A genome-wide survey over the ChIP-on-chip identified androgen receptor-binding genomic regions identifies a novel prostate cancer susceptibility locus at 12q13.13. Cancer Epidemiol Biomarkers Prev. 2011 Nov;20(11):2396-403.
GLI2	rs11122834	2q14	5e-06	erdisfanct/nggri	20932654	Kerns SL, Ostrer H, Stock R, Genome-wide association study to identify single nucleotide polymorphisms (SNPs) associated with the development of erectile dysfunction in African-American men after radiotherapy for prostate cancer. 2010 Dec 1;78(5):1292-300.
GLIS2	rs9921192	16p13.3	1e-09	GWASTABLE	28139693	Hoffmann TJ	2017-01-31	Nat Commun
GLIS2	rs9921192	16p13.3	1e-09	GWASTABLE	28139693	Hoffmann TJ	2017-05-25	Nat Commun
GOLPH3L	rs17599629	1q21.3	6e-11	GWASTABLE	25217961	Al Olama AA	2014-09-14	Nat Genet
GOLPH3L	rs17599629	1q21.3	1e-06	GWASTABLE	26034056	Hoffmann TJ	2016-07-15	Cancer Discov
GOLPH3L	rs17599629	1q21.3	9e-06	GWASTABLE	26034056	Hoffmann TJ	2016-07-15	Cancer Discov
GOLPH3L	rs17599629	1q21.3	3e-09	GWASTABLE	25217961	Al Olama AA	2015-05-07	Nat Genet
GOLPH3L	rs17599629	1q21.3	6e-11	GWASTABLE	25217961	Al Olama AA	2015-05-07	Nat Genet
GOLPH3L	rs17599629	1q21.3	1e-11	GWASTABLE	29892016	Schumacher FR	2018-08-14	Nat Genet
GPR143	rs2405942	Xp22.2	2e-10	GWASTABLE	23535732	Eeles RA	2013-04-01	Nat Genet
GPR143	rs2405942	Xp22.2	2e-10	GWASTABLE	23535732	Eeles RA	2013-09-16	Nat Genet
GPRC6A	rs339331	6q22.31	1.6x10-12	literature	22114074	Wang M, Liu F, Hsing AW, Wang X, Shao Q, Qi J, Ye Y, Wang Z, Chen H, et al. Replication and cumulative effects of GWAS-identified genetic variations for prostate cancer in Asians: a case-control study in the ChinaPCa consortium. Carcinogenesis. 2012 Feb;33(2):356-60.
GPRC6A	rs339331	6q22.1	2e-12	GWASTABLE	20676098	Takata R	2010-08-01	Nat Genet
GPRC6A	rs339331	6q22.31	2.8x10-9	literature	22132073	Batra J, Lose F, O'Mara T, Marquart L, Stephens C, Alexander K, Srinivasan S, Eeles RA, Easton DF, Al Olama AA, Kote-Jarai Z, Guy M, Muir K, Lophatananon A, Rahman AA, Neal DE, Hamdy FC, Donovan JL, Chambers S, Gardiner RA, Aitken J, Yaxley J, Kedda MA, Clements JA, Spurdle AB. Association between Prostinogen (KLK15) genetic variants and prostate cancer risk and aggressiveness in Australia and a …
GPRC6A	rs339331	6q22.31	0.001	literature	22056502	Lindstr≈m S, Schumacher FR, Campa D, Albanes D, Andriole G, Berndt SI, et al. Replication of five prostate cancer loci identified in an Asian population--results from the NCI Breast and Prostate Cancer Cohort Consortium (BPC3). Cancer Epidemiol Biomarkers Prev. 2012 Jan;21(1):212-6.
GPRC6A	rs339331	6q22.31	0.002	literature	22056501	Lindstr≈m S, Schumacher FR, Campa D, Albanes D, Andriole G. Replication of five prostate cancer loci identified in an Asian population--results from the NCI Breast and Prostate Cancer Cohort Consortium (BPC3). Cancer Epidemiol Biomarkers Prev. 2012 Jan;21(1):212-6.
GPRC6A	rs339331	6q22.31	0.002	literature	21390317	Lindstrom S, Schumacher F, Siddiq A, Travis RC, Campa D, et al. Characterizing associations and SNP-environment interactions for GWAS-identified prostate cancer risk markers--results from BPC3. PLoS One. 2011 Feb 24;6(2):e17142.
GPRC6A	rs339331	6q22.31	1.42x10-5	literature	22662242	Long QZ, Du YF, Ding XY, Li X, Song WB, Yang Y, Zhang P, Zhou JP, Liu XG. Replication and fine mapping for association of the C2orf43, FOXP4, GPRC6A and RFX6 genes with prostate cancer in the Chinese population. PLoS One. 2012;7(5):e37866.
GPRC6A	rs339331	6q22.1	2e-12	GWASTABLE	20676098	Takata R	2010-09-11	Nat Genet
GRHL1	rs11902236	2p25.1	5e-07	GWASTABLE	29892016	Schumacher FR	2018-08-14	Nat Genet
GTPBP5	rs2427345	20q13.33	4e-08	GWASTABLE	23535732	Eeles RA	2013-04-01	Nat Genet
GTPBP5	rs2427345	20q13.33	4e-08	GWASTABLE	23535732	Eeles RA	2013-09-16	Nat Genet
HAPLN1	rs4466137	5q14.3	3e-06	nggri	21743057	Schumacher FR, Berndt SI, Siddiq A, Genome-wide association study identifies new prostate cancer susceptibility loci. 2011 Oct 1;20(19):3867-75.
HAPLN1	rs4466137	5q14.3	3e-06	GWASTABLE	17903305	Murabito JM	2007-09-19	BMC Med Genet
HAPLN1	rs4466137	5q14.3	3e-06	GWASTABLE	17903305	Murabito JM	2008-09-17	BMC Med Genet
HAUS6	rs1048169	9p22.1	7e-14	GWASTABLE	29892016	Schumacher FR	2018-08-14	Nat Genet
HAUS6	rs1048169	9p22.1	8e-07	GWASTABLE	29892016	Schumacher FR	2018-08-14	Nat Genet
HERC2	rs6497287	15q13	0.004	literature	21467234	FitzGerald LM, Kwon EM, Conomos MP, Kolb S, Holt SK, Levine D, Feng Z, Ostrander EA, Stanford JL. Genome-wide association study identifies a genetic variant associated with risk for more aggressive prostate cancer. Cancer Epidemiol Biomarkers Prev. 2011 Jun;20(6):1196-203.
HLA	rs115306967	6p21.32	9e-07	GWASTABLE	25217961	Al Olama AA	2015-05-07	Nat Genet
HLA	rs115306967	6p21.32	3e-09	GWASTABLE	25217961	Al Olama AA	2015-05-07	Nat Genet
HLA	rs9296068	6p21.32	1e-08	GWASTABLE	29892016	Schumacher FR	2018-08-14	Nat Genet
HLA-DRB6	rs115306967	6p21.32	3e-09	GWASTABLE	25217961	Al Olama AA	2014-09-14	Nat Genet
HNF1B	rs11263761	17q12	6e-20	GWASTABLE	28139693	Hoffmann TJ	2017-01-31	Nat Commun
HNF1B	rs11263761	17q12	6e-20	GWASTABLE	28139693	Hoffmann TJ	2017-05-25	Nat Commun
HNF1B	rs11263763	17q12	5e-24	GWASTABLE	26034056	Hoffmann TJ	2016-07-15	Cancer Discov
HNF1B	rs11649743	17q12	3.54x10-08	literature	21576123	Berndt SI, Sampson J, Yeager M, Jacobs KB, Wang Z, et al. Large-scale fine mapping of the HNF1B locus and prostate cancer risk. Hum Mol Genet. 2011 Aug 15;20(16):3322-9.
HNF1B	rs11649743	17q12	2.70x10-4	literature	21372204	Ciampa J, Yeager M, Amundadottir L, Jacobs K, Kraft P, Chung C, et al. Large-scale exploration of gene-gene interactions in prostate cancer using a multistage genome-wide association study. Cancer Res. 2011 May 1;71(9):3287-95.
HNF1B	rs11649743	17q12	0.04	literature	21637779	Haiman CA, Chen GK, Blot WJ, Strom SS, Berndt SI, Kittles RA. Et al. Characterizing genetic risk at known prostate cancer susceptibility loci in African Americans. PLoS Genet. 2011 May;7(5):e1001387.
HNF1B	rs11649743	17q12	1.19x10-9	literature	20564319	Kim ST, Cheng Y, Hsu FC, Jin T, Kader AK, Zheng SL, Isaacs WB, Xu J, Sun J. Prostate cancer risk-associated variants reported from genome-wide association studies: meta-analysis and their contribution to genetic Variation. Prostate. 2010 Dec 1;70(16):1729-38.
HNF1B	rs11649743	17q12	8.5x10-3	literature	21756274	Liu F, Hsing AW, Wang X, Shao Q, Qi J, Ye Y, Wang Z, Chen H, Gao X, et al. Systematic confirmation study of reported prostate cancer risk-associated single nucleotide polymorphisms in Chinese men. Cancer Sci. 2011 Oct;102(10):1916-20.
HNF1B	rs11649743	17q12	2.58x10-2	literature	18361410	Sun J, Purcell L, Gao Z, Isaacs SD, Wiley KE, Hsu FC, et al. Association between sequence variants at 17q12 and 17q24.3 and prostate cancer risk in European and African Americans. Prostate. 2008 May 15;68(7):691-7.
HNF1B	rs11649743	17q12	1e-06	GWASTABLE	26034056	Hoffmann TJ	2016-07-15	Cancer Discov
HNF1B	rs11649743	17q12	6e-07	GWASTABLE	26034056	Hoffmann TJ	2016-07-15	Cancer Discov
HNF1B	rs11651052	17q12	3e-10	GWASTABLE	27262462	Teerlink CC	2016-06-04	Hum Genet
HNF1B	rs11651052	17q12	3e-10	GWASTABLE	27262462	Teerlink CC	2017-02-03	Hum Genet
HNF1B	rs13192613	6q22.31 x 17q12	3e-06	GWASTABLE	22219177	Tao S	2012-01-04	Carcinogenesis
HNF1B	rs2005705	17q12	2.54x10-23	literature	21576123	Berndt SI, Sampson J, Yeager M, Jacobs KB, Wang Z, et al. Large-scale fine mapping of the HNF1B locus and prostate cancer risk. Hum Mol Genet. 2011 Aug 15;20(16):3322-9.
HNF1B	rs2005705	17q12	1e-06	GWASTABLE	24740154	Lange EM	2014-11-09	PLoS One
HNF1B	rs3744763	17q12	1.21x10-08	literature	21576123	Berndt SI, Sampson J, Yeager M, Jacobs KB, Wang Z, et al. Large-scale fine mapping of the HNF1B locus and prostate cancer risk. Hum Mol Genet. 2011 Aug 15;20(16):3322-9.
HNF1B	rs3760511	17q12	4.45x10-15	literature	21576123	Berndt SI, Sampson J, Yeager M, Jacobs KB, Wang Z, et al. Large-scale fine mapping of the HNF1B locus and prostate cancer risk. Hum Mol Genet. 2011 Aug 15;20(16):3322-9.
HNF1B	rs3760511	17q12	8.8x10-4	literature	18361410	Sun J, Purcell L, Gao Z, Isaacs SD, Wiley KE, Hsu FC, et al. Association between sequence variants at 17q12 and 17q24.3 and prostate cancer risk in European and African Americans. Prostate. 2008 May 15;68(7):691-7.
HNF1B	rs4239217	17q12	1.57x10-16	literature	21576123	Berndt SI, Sampson J, Yeager M, Jacobs KB, Wang Z, et al. Large-scale fine mapping of the HNF1B locus and prostate cancer risk. Hum Mol Genet. 2011 Aug 15;20(16):3322-9.
HNF1B	rs4430796	17q12	0.004	literature	20450899	Bao BY, Pao JB, Lin VC, Huang CN, Chang TY. Et al. Individual and cumulative association of prostate cancer susceptibility variants with clinicopathologic characteristics of the disease. Clin Chim Acta. 2010 Sep 6;411(17-18):1232-7.
HNF1B	rs4430796	17q12	1.62x10-24	literature	21576123	Berndt SI, Sampson J, Yeager M, Jacobs KB, Wang Z, et al. Large-scale fine mapping of the HNF1B locus and prostate cancer risk. Hum Mol Genet. 2011 Aug 15;20(16):3322-9.
HNF1B	rs4430796	17q12	0.05	literature	21071540	Chang BL, Spangler E, Gallagher S, Haiman CA, Henderson B, Isaacs W. et al. Validation of genome-wide prostate cancer associations in men of African descent. Cancer Epidemiol Biomarkers Prev. 2011 Jan;20(1):23-32.
HNF1B	rs4430796	17q12	1.85x10-11	literature	21372204	Ciampa J, Yeager M, Amundadottir L, Jacobs K, Kraft P, Chung C, et al. Large-scale exploration of gene-gene interactions in prostate cancer using a multistage genome-wide association study. Cancer Res. 2011 May 1;71(9):3287-95.
HNF1B	rs4430796	17q12	3.2x10-6	literature	19366831	Fitzgerald LM, Kwon EM, Koopmeiners JS, Salinas CA, Stanford JL, Ostrander EA. Analysis of recently identified prostate cancer susceptibility loci in a population-based study: associations with family history and clinical features. Clin Cancer Res. 2009 May 1;15(9):3231-7.
HNF1B	rs4430796	17q12	1e-09	nggri	21467234	FitzGerald LM, Kwon EM, Conomos MP, Genome-wide association study identifies a genetic variant associated with risk for more aggressive prostate cancer. 2011 Jun;20(6):1196-203
HNF1B	rs4430796	17q12	2.00x10-4	literature	22730461	Grisanzio C, Werner L, Takeda D, Awoyemi BC, Pomerantz MM. et al. Genetic and functional analyses implicate the NUDT11, HNF1B, and SLC22A3 genes in prostate cancer pathogenesis. Proc Natl Acad Sci U S A. 2012 Jul 10;109(28):11252-7.
HNF1B	rs4430796	17q12	3x10-10	literature	21160077	Gudmundsson J, Besenbacher S, Sulem P, Gudbjartsson DF, Olafsson I, et al. Genetic correction of PSA values using sequence variants associated with PSA levels. Sci Transl Med. 2010 Dec 15;2(62):62ra92.
HNF1B	rs4430796	17q12	8.3x10-6	literature	19767754	Gudmundsson J, Sulem P, Gudbjartsson DF, Blondal T, Gylfason A, Agnarsson BA. Et al. Genome-wide association and replication studies identify four variants associated with prostate cancer susceptibility. Nat Genet. 2009 Oct;41(10):1122-6.
HNF1B	rs4430796	17q12	0.04	literature	17603485	Gudmundsson J, Sulem P, Steinthorsdottir V, Bergthorsson JT, Thorleifsson G, Manolescu A, Rafnar T, et al. Two variants on chromosome 17 confer prostate cancer risk, and the one in TCF2 protects against type 2 diabetes. Nat Genet. 2007 Aug;39(8):977-83. Epub 2007 Jul 1.
HNF1B	rs4430796	17q12	0.01	literature	22198737	Jin G, Lu L, Cooney KA, Ray AM, Zuhlke KA, Lange EM, Cannon-Albright LA, Camp NJ, et al. 2012. Validation of prostate cancer risk-related loci identified from genome-wide association studies using family-based association analysis: evidence from the International Consortium for Prostate Cancer Genetics (ICPCG). Hum Genet. 2012 Jul;131(7):1095-103.
HNF1B	rs4430796	17q12	1.13x10-25	literature	20564319	Kim ST, Cheng Y, Hsu FC, Jin T, Kader AK, Zheng SL, Isaacs WB, Xu J, Sun J. Prostate cancer risk-associated variants reported from genome-wide association studies: meta-analysis and their contribution to genetic Variation. Prostate. 2010 Dec 1;70(16):1729-38.
HNF1B	rs4430796	17q12	0.001	literature	20690139	Liu H, Wang B, Han C. Meta-analysis of genome-wide and replication association studies on prostate cancer. Prostate. 2011 Feb 1;71(2):209-24.
HNF1B	rs4430796	17q12	0.007	literature	21557267	Liu M, Suzuki M, Arai T, Sawabe M, Enomoto Y, Nishimatsu H, Kume H, Homma Y, Kitamura T. A replication study examining three common single-nucleotide polymorphisms and the risk of prostate cancer in a Japanese population. Prostate. 2011 Jul;71(10):1023-32.
HNF1B	rs4430796	17q12	8e-06	nggri	21743057	Schumacher FR, Berndt SI, Siddiq A, Genome-wide association study identifies new prostate cancer susceptibility loci. 2011 Oct 1;20(19):3867-75.
HNF1B	rs4430796	17q12	5.1x10-4	literature	18361410	Sun J, Purcell L, Gao Z, Isaacs SD, Wiley KE, Hsu FC, et al. Association between sequence variants at 17q12 and 17q24.3 and prostate cancer risk in European and African Americans. Prostate. 2008 May 15;68(7):691-7.
HNF1B	rs4430796	17q12	1e-11	nggri	20676098	Takata R, Akamatsu S, Kubo M, Genome-wide association study identifies five new susceptibility loci for prostate cancer in the Japanese population. 2010 Sep;42(9):751-4.
HNF1B	rs4430796	17q12	9.58x10-10	literature	18264096	Thomas G, Jacobs KB, Yeager M, Kraft P, Wacholder S, Orr N, Yu K, Chatterjee N, et al. Multiple loci identified in a genome-wide association study of prostate cancer. Nat Genet. 2008 Mar;40(3):310-5.
HNF1B	rs4430796	17q12	0.009	literature	21829199	Vijai J, Kirchhoff T, Gallagher D, Hamel N, Guha S, Darvasi A, et al. Genetic architecture of prostate cancer in the Ashkenazi Jewish population. Br J Cancer. 2011 Sep 6;105(6):864-9.
HNF1B	rs4430796	17q12	9.1x10-4	literature	19318432	Waters KM, Le Marchand L, Kolonel LN, Monroe KR, Stram DO, Henderson BE, Haiman CA. Generalizability of associations from prostate cancer genome-wide association studies in multiple populations. Cancer Epidemiol Biomarkers Prev. 2009 Apr;18(4):1285-9.
HNF1B	rs4430796	17q12	7.9x10-5	literature	19116992	Wiklund F, Zheng SL, Sun J, Adami HO, Lilja H, Hsu FC, et al. Association of reported prostate cancer risk alleles with PSA levels among men without a diagnosis of prostate cancer. Prostate. 2009 Mar 1;69(4):419-27.
HNF1B	rs4430796	17q12	4.9x10-5	literature	19726753	Yamada H, Penney KL, Takahashi H, Katoh T, Yamano Y, et al. Replication of prostate cancer risk loci in a Japanese case-control association study. J Natl Cancer Inst. 2009 Oct 7;101(19):1330-6.
HNF1B	rs4430796	17q12	6e-08	GWASTABLE	26443449	Wang M	2015-10-07	Nat Commun
HNF1B	rs4430796	17q12	1e-11	GWASTABLE	17603485	Gudmundsson J	2008-06-16	Nat Genet
HNF1B	rs4430796	17q12	1e-09	GWASTABLE	18264096	Thomas G	2008-06-16	Nat Genet
HNF1B	rs4430796	17q12	8e-06	GWASTABLE	19767754	Gudmundsson J	2009-10-05	Nat Genet
HNF1B	rs4430796	17q12	6e-08	GWASTABLE	26443449	Wang M	2016-06-13	Nat Commun
HNF1B	rs4430796	17q12	1e-132	GWASTABLE	29892016	Schumacher FR	2018-08-14	Nat Genet
HNF1B	rs4794758	17q12	4.95x10-10	literature	21576123	Berndt SI, Sampson J, Yeager M, Jacobs KB, Wang Z, et al. Large-scale fine mapping of the HNF1B locus and prostate cancer risk. Hum Mol Genet. 2011 Aug 15;20(16):3322-9.
HNF1B	rs7405696	17q12	9.35x10-23	literature	21576123	Berndt SI, Sampson J, Yeager M, Jacobs KB, Wang Z, et al. Large-scale fine mapping of the HNF1B locus and prostate cancer risk. Hum Mol Genet. 2011 Aug 15;20(16):3322-9.
HNF1B	rs7501939	17q12	1.22x10-16	literature	21576123	Berndt SI, Sampson J, Yeager M, Jacobs KB, Wang Z, et al. Large-scale fine mapping of the HNF1B locus and prostate cancer risk. Hum Mol Genet. 2011 Aug 15;20(16):3322-9.
HNF1B	rs7501939	17q12	9e-12	nggri	21602798	Haiman CA, Chen GK, Blot WJ, Genome-wide association study of prostate cancer in men of African ancestry identifies a susceptibility locus at 17q21. 2011 Jun;43(6):570-3.
HNF1B	rs7501939	17q12	0.001	literature	21756274	Liu F, Hsing AW, Wang X, Shao Q, Qi J, Ye Y, Wang Z, Chen H, Gao X, et al. Systematic confirmation study of reported prostate cancer risk-associated single nucleotide polymorphisms in Chinese men. Cancer Sci. 2011 Oct;102(10):1916-20.
HNF1B	rs7501939	17q12	0.001	literature	20690139	Liu H, Wang B, Han C. Meta-analysis of genome-wide and replication association studies on prostate cancer. Prostate. 2011 Feb 1;71(2):209-24.
HNF1B	rs7501939	17q12	2e-06	nggri	21743057	Schumacher FR, Berndt SI, Siddiq A, Genome-wide association study identifies new prostate cancer susceptibility loci. 2011 Oct 1;20(19):3867-75.
HNF1B	rs7501939	17q12	1.8x10-4	literature	18361410	Sun J, Purcell L, Gao Z, Isaacs SD, Wiley KE, Hsu FC, et al. Association between sequence variants at 17q12 and 17q24.3 and prostate cancer risk in European and African Americans. Prostate. 2008 May 15;68(7):691-7.
HNF1B	rs7501939	17q12	1e-12	GWASTABLE	20676098	Takata R	2010-08-01	Nat Genet
HNF1B	rs7501939	17q12	9e-12	GWASTABLE	18264097	Eeles RA	2008-02-10	Nat Genet
HNF1B	rs7501939	17q12	1e-12	GWASTABLE	20676098	Takata R	2010-09-11	Nat Genet
HNF1B	rs7501939	17q12	9e-12	GWASTABLE	18264097	Eeles RA	2008-06-16	Nat Genet
HNF1B	rs7501939	17q12	2e-06	GWASTABLE	21743057	Schumacher FR	2011-07-30	Hum Mol Genet
HNF1B	rs7501939	17q12	1e-14	GWASTABLE	26034056	Hoffmann TJ	2016-07-15	Cancer Discov
HNF1B	rs7501939	17q12	4e-15	GWASTABLE	26034056	Hoffmann TJ	2016-07-15	Cancer Discov
HNF1B	rs7501939	17q12	3e-18	GWASTABLE	19767753	Eeles RA	2009-12-29	Nat Genet
HNF1B	rs757210	17q12	1.39x10-15	literature	21576123	Berndt SI, Sampson J, Yeager M, Jacobs KB, Wang Z, et al. Large-scale fine mapping of the HNF1B locus and prostate cancer risk. Hum Mol Genet. 2011 Aug 15;20(16):3322-9.
HNF1B	rs8064454	17q12	8e-29	GWASTABLE	25939597	Berndt SI	2015-05-05	Nat Commun
HNF1B	rs8064454	17q12	8e-29	GWASTABLE	25939597	Berndt SI	2016-02-12	Nat Commun
HNRNPA1P57	rs148184576	2p22.1	3e-06	GWASTABLE	29356057	Du Z	2018-07-03	Prostate
HOXB13	(rs138213197	8q24.21	0.006	literature	22714738	Breyer JP, Avritt TG, McReynolds KM, Dupont WD, Smith JR. Confirmation of the HOXB13 G84E germline mutation in familial prostate cancer. Cancer Epidemiol Biomarkers Prev. 2012 Aug;21(8):1348-53.
HOXB13	rs138213197	17q21.32	9e-63	GWASTABLE	29892016	Schumacher FR	2018-08-14	Nat Genet
HOXB13	rs188140481	8q24.21	6e-34	GWASTABLE	23104005	Gudmundsson J	2012-10-28	Nat Genet
HOXB13	rs188140481	8q24.21	6e-34	GWASTABLE	23104005	Gudmundsson J	2015-05-15	Nat Genet
HSD17B3	rs2066485	9q22	0.02	literature	22542949	Kwon EM, Holt SK, Fu R, Kolb S, Williams G, Stanford JL, Ostrander EA. Androgen metabolism and JAK/STAT pathway genes and prostate cancer risk. Cancer Epidemiol. 2012 Aug;36(4):347-53.
HSD17B3	rs2253502	9q22	0.004	literature	22542949	Kwon EM, Holt SK, Fu R, Kolb S, Williams G, Stanford JL, Ostrander EA. Androgen metabolism and JAK/STAT pathway genes and prostate cancer risk. Cancer Epidemiol. 2012 Aug;36(4):347-53.
HSD17B3	rs2257157	9q22	0.03	literature	22542949	Kwon EM, Holt SK, Fu R, Kolb S, Williams G, Stanford JL, Ostrander EA. Androgen metabolism and JAK/STAT pathway genes and prostate cancer risk. Cancer Epidemiol. 2012 Aug;36(4):347-53.
HTR3B	rs11214775	11q23.2	5e-08	GWASTABLE	25217961	Al Olama AA	2014-09-14	Nat Genet
HTR3B	rs11214775	11q23.2	5e-08	GWASTABLE	25217961	Al Olama AA	2015-05-07	Nat Genet
HTR3B	rs11214775	11q23.2	3e-08	GWASTABLE	25217961	Al Olama AA	2015-05-07	Nat Genet
HTR3B	rs11214775	11q23.2	4e-15	GWASTABLE	29892016	Schumacher FR	2018-08-14	Nat Genet
IGF2	rs7127900	11p15.5	3.06x10-1	literature	19767753	Eeles RA, Kote-Jarai Z, Al Olama AA, Giles GG, Guy M, Severi G, Muir K. et al. Identification of seven new prostate cancer susceptibility loci through a genome-wide association study. Nat Genet. 2009 Oct;41(10):1116-21.
IGF2	rs7127900	11p15.5	3e-33	GWASTABLE	19767753	Eeles RA	2009-12-29	Nat Genet
IGF2AS	rs7127900	11p15.5	3.06x10-1	literature	19767753	Eeles RA, Kote-Jarai Z, Al Olama AA, Giles GG, Guy M, Severi G, Muir K. et al. Identification of seven new prostate cancer susceptibility loci through a genome-wide association study. Nat Genet. 2009 Oct;41(10):1116-21.
IKZF2	rs7569918	2q13.1	8.85x10-4	literature	21960693	Feng J, Sun J, Kim ST, Lu Y, Wang Z, Zhang Z, Gronberg H, Isaacs WB, Zheng SL, Xu J. A genome-wide survey over the ChIP-on-chip identified androgen receptor-binding genomic regions identifies a novel prostate cancer susceptibility locus at 12q13.13. Cancer Epidemiol Biomarkers Prev. 2011 Nov;20(11):2396-403.
IL16	rs7175701	15q26.3	9.8x10-8	literature	22923025	Batai K, Shah E, Murphy AB, Newsome J, Ruden M, Ahaghotu C, Kittles RA. Fine-mapping of IL16 gene and prostate cancer risk in African Americans. Cancer Epidemiol Biomarkers Prev. 2012 Nov;21(11):2059-68.
IL1RAPL1	rs225061	Xp22.1-p21.3	9.71x10-4	literature	21467234	FitzGerald LM, Kwon EM, Conomos MP, Kolb S, Holt SK, Levine D, Feng Z, Ostrander EA, Stanford JL. Genome-wide association study identifies a genetic variant associated with risk for more aggressive prostate cancer. Cancer Epidemiol Biomarkers Prev. 2011 Jun;20(6):1196-203.
INCENP	rs2277283	11q12.3	3e-10	GWASTABLE	29892016	Schumacher FR	2018-08-14	Nat Genet
INHBA	rs7789197 x rs1447295	7p14.1 x 8q24.21	3e-06	GWASTABLE	22219177	Tao S	2012-03-31	Carcinogenesis
INHBA x NR	rs7789197 x rs1447295	7p14.1 x 8q24.21	3e-06	GWASTABLE	22219177	Tao S	2012-01-04	Carcinogenesis
INS	rs7127900	11p15.5	3.06x10-1	literature	19767753	Eeles RA, Kote-Jarai Z, Al Olama AA, Giles GG, Guy M, Severi G, Muir K. et al. Identification of seven new prostate cancer susceptibility loci through a genome-wide association study. Nat Genet. 2009 Oct;41(10):1116-21.
INSC	rs11605083 x rs7679673	11p15.2 x 4q24	4e-06	GWASTABLE	22219177	Tao S	2012-01-04	Carcinogenesis
INSC	rs11605083 x rs7679673	11p15.2 x 4q24	4e-06	GWASTABLE	22219177	Tao S	2012-03-31	Carcinogenesis
IRS2	rs75823044	13q34	6e-12	GWASTABLE	29117387	Conti DV	2017-08-01	J Natl Cancer Inst
IRS2	rs75823044	13q34	6e-12	GWASTABLE	29117387	Conti DV	2017-11-24	J Natl Cancer Inst
IRS2	rs7986346	13q34	<0.04	literature	22844442	Huang SP, Bao BY, Hour TC, Huang CY, Yu CC, Liu CC, Lee YC, Huang CN, Pao JB, Huang CH. Genetic variants in CASP3, BMP5, and IRS2 genes may influence survival in prostate cancer patients receiving androgen-deprivation therapy. PLoS One. 2012;7(7):e41219.
IRX4	rs12653946	5p15.33	3.9x10-18	literature	20676098	Takata R, Akamatsu S, Kubo M, Takahashi A et al. Genome-wide association study identifies five new susceptibility loci for prostate cancer in the Japanese population. Nat Genet. 2010 Sep;42(9):751-4.
IRX4	rs12653946	5p15.33	2e-12	GWASTABLE	26443449	Wang M	2015-10-07	Nat Commun
IRX4	rs12653946	5p15.33	2e-12	GWASTABLE	26443449	Wang M	2016-06-13	Nat Commun
ITGA6	rs126212278	2q31.1	0.001	literature	21390317	Lindstrom S, Schumacher F, Siddiq A, Travis RC, Campa D, et al. Characterizing associations and SNP-environment interactions for GWAS-identified prostate cancer risk markers--results from BPC3. PLoS One. 2011 Feb 24;6(2):e17142.
ITGA6	rs126212278	2q31.1	0.02	literature	21756274	Liu F, Hsing AW, Wang X, Shao Q, Qi J, Ye Y, Wang Z, Chen H, Gao X, et al. Systematic confirmation study of reported prostate cancer risk-associated single nucleotide polymorphisms in Chinese men. Cancer Sci. 2011 Oct;102(10):1916-20.
ITGA6	rs12621278	2q31.1	6.18x10-1	literature	19767753	Eeles RA, Kote-Jarai Z, Al Olama AA, Giles GG, Guy M, Severi G, Muir K. et al. Identification of seven new prostate cancer susceptibility loci through a genome-wide association study. Nat Genet. 2009 Oct;41(10):1116-21.
ITGA6	rs12621278	2q31.1	0.03	literature	21637779	Haiman CA, Chen GK, Blot WJ, Strom SS, Berndt SI, Kittles RA. Et al. Characterizing genetic risk at known prostate cancer susceptibility loci in African Americans. PLoS Genet. 2011 May;7(5):e1001387.
ITGA6	rs12621278	2q31.1	3.36x10-19	literature	20564319	Kim ST, Cheng Y, Hsu FC, Jin T, Kader AK, Zheng SL, Isaacs WB, Xu J, Sun J. Prostate cancer risk-associated variants reported from genome-wide association studies: meta-analysis and their contribution to genetic Variation. Prostate. 2010 Dec 1;70(16):1729-38.
ITGA6	rs12621278	2q31.1	9e-23	nggri	20676098	Takata R, Akamatsu S, Kubo M, Genome-wide association study identifies five new susceptibility loci for prostate cancer in the Japanese population. 2010 Sep;42(9):751-4.
ITGA6	rs12621278	2q31.1	9e-23	GWASTABLE	19767753	Eeles RA	2009-12-29	Nat Genet
ITGA6	rs12621278	2q31.1	2e-42	GWASTABLE	29892016	Schumacher FR	2018-08-14	Nat Genet
ITGB8	rs11452686	7p21.1	8e-09	GWASTABLE	29892016	Schumacher FR	2018-08-14	Nat Genet
JAK2	rs10429491	9p24	0.002	literature	22542949	Kwon EM, Holt SK, Fu R, Kolb S, Williams G, Stanford JL, Ostrander EA. Androgen metabolism and JAK/STAT pathway genes and prostate cancer risk. Cancer Epidemiol. 2012 Aug;36(4):347-53.
JAZF1	rs104865567	7p15.2-p15.1	7.87x10-2	literature	18264096	Thomas G, Jacobs KB, Yeager M, Kraft P, Wacholder S, Orr N, Yu K, Chatterjee N, et al. Multiple loci identified in a genome-wide association study of prostate cancer. Nat Genet. 2008 Mar;40(3):310-5.
JAZF1	rs10486567	7p15.2-p15.1	0.04	literature	20450899	Bao BY, Pao JB, Lin VC, Huang CN, Chang TY. Et al. Individual and cumulative association of prostate cancer susceptibility variants with clinicopathologic characteristics of the disease. Clin Chim Acta. 2010 Sep 6;411(17-18):1232-7.
JAZF1	rs10486567	7p15.2-p15.1	0.0002	literature	21071540	Chang BL, Spangler E, Gallagher S, Haiman CA, Henderson B, Isaacs W. et al. Validation of genome-wide prostate cancer associations in men of African descent. Cancer Epidemiol Biomarkers Prev. 2011 Jan;20(1):23-32.
JAZF1	rs10486567	7p15.2-p15.1	2.21x10-7	literature	21372204	Ciampa J, Yeager M, Amundadottir L, Jacobs K, Kraft P, Chung C, et al. Large-scale exploration of gene-gene interactions in prostate cancer using a multistage genome-wide association study. Cancer Res. 2011 May 1;71(9):3287-95.
JAZF1	rs10486567	7p15.2-p15.1	2.83x10-4	literature	21960693	Feng J, Sun J, Kim ST, Lu Y, Wang Z, Zhang Z, Gronberg H, Isaacs WB, Zheng SL, Xu J. A genome-wide survey over the ChIP-on-chip identified androgen receptor-binding genomic regions identifies a novel prostate cancer susceptibility locus at 12q13.13. Cancer Epidemiol Biomarkers Prev. 2011 Nov;20(11):2396-403.
JAZF1	rs10486567	7p15.2-p15.1	8.9x10-4	literature	19366831	Fitzgerald LM, Kwon EM, Koopmeiners JS, Salinas CA, Stanford JL, Ostrander EA. Analysis of recently identified prostate cancer susceptibility loci in a population-based study: associations with family history and clinical features. Clin Cancer Res. 2009 May 1;15(9):3231-7.
JAZF1	rs10486567	7p15.2-p15.1	0.0007	literature	20460480	Gallagher DJ, Vijai J, Cronin AM, Bhatia J, Vickers AJ. Et al. Susceptibility loci associated with prostate cancer progression and mortality. Clin Cancer Res. 2010 May 15;16(10):2819-32.
JAZF1	rs10486567	7p15.2-p15.1	4.4x10-3	literature	19767754	Gudmundsson J, Sulem P, Gudbjartsson DF, Blondal T, Gylfason A, Agnarsson BA. Et al. Genome-wide association and replication studies identify four variants associated with prostate cancer susceptibility. Nat Genet. 2009 Oct;41(10):1122-6.
JAZF1	rs10486567	7p15.2-p15.1	2.9x10-4	literature	21637779	Haiman CA, Chen GK, Blot WJ, Strom SS, Berndt SI, Kittles RA. Et al. Characterizing genetic risk at known prostate cancer susceptibility loci in African Americans. PLoS Genet. 2011 May;7(5):e1001387.
JAZF1	rs10486567	7p15.2-p15.1	7.05x10-14	literature	21390317	Lindstrom S, Schumacher F, Siddiq A, Travis RC, Campa D, et al. Characterizing associations and SNP-environment interactions for GWAS-identified prostate cancer risk markers--results from BPC3. PLoS One. 2011 Feb 24;6(2):e17142.
JAZF1	rs10486567	7p15.2-p15.1	0.001	literature	20690139	Liu H, Wang B, Han C. Meta-analysis of genome-wide and replication association studies on prostate cancer. Prostate. 2011 Feb 1;71(2):209-24.
JAZF1	rs10486567	7p15.2-p15.1	7.79x10-11	literature	20406958	Prokunina-Olsson L, Fu YP, Tang W, Jacobs KB, Hayes RB. et al. Refining the prostate cancer genetic association within the JAZF1 gene on chromosome 7p15.2. Cancer Epidemiol Biomarkers Prev. 2010 May;19(5):1349-55.
JAZF1	rs10486567	7p15.2-p15.1	2e-06	nggri	20676098	Takata R, Akamatsu S, Kubo M, Genome-wide association study identifies five new susceptibility loci for prostate cancer in the Japanese population. 2010 Sep;42(9):751-4.
JAZF1	rs10486567	7p15.2-p15.1	2.14x10-06	literature	18264096	Thomas G, Jacobs KB, Yeager M, Kraft P, Wacholder S, Orr N, Yu K, Chatterjee N, et al. Multiple loci identified in a genome-wide association study of prostate cancer. Nat Genet. 2008 Mar;40(3):310-5.
JAZF1	rs10486567	7p15.2-p15.1	2.15x10-4	literature	22459122	Tsilidis KK, Travis RC, Appleby PN, Allen NE, Lindstrom S, Schumacher FR, et al. Interactions between genome-wide significant genetic variants and circulating concentrations of insulin-like growth factor 1, sex hormones, and binding proteins in relation to prostate cancer risk in the National Cancer Institute Breast and Prostate Cancer Cohort Consortium. Am J Epidemiol. 2012 May 1;175(9):926-35.
JAZF1	rs10486567	7p15.2-p15.1	2.1x10-5	literature	19318432	Waters KM, Le Marchand L, Kolonel LN, Monroe KR, Stram DO, Henderson BE, Haiman CA. Generalizability of associations from prostate cancer genome-wide association studies in multiple populations. Cancer Epidemiol Biomarkers Prev. 2009 Apr;18(4):1285-9.
JAZF1	rs10486567	7p15.2-p15.1	3.0x10-4	literature	19116992	Wiklund F, Zheng SL, Sun J, Adami HO, Lilja H, Hsu FC, et al. Association of reported prostate cancer risk alleles with PSA levels among men without a diagnosis of prostate cancer. Prostate. 2009 Mar 1;69(4):419-27.
JAZF1	rs10486567	7p15.1	4e-19	GWASTABLE	28139693	Hoffmann TJ	2017-01-31	Nat Commun
JAZF1	rs10486567	7p15.1	2e-06	GWASTABLE	18264096	Thomas G	2008-06-16	Nat Genet
JAZF1	rs10486567	7p15.1	3e-09	GWASTABLE	26034056	Hoffmann TJ	2016-07-15	Cancer Discov
JAZF1	rs10486567	7p15.1	3e-11	GWASTABLE	26034056	Hoffmann TJ	2016-07-15	Cancer Discov
JAZF1	rs10486567	7p15.1	2e-45	GWASTABLE	29892016	Schumacher FR	2018-08-14	Nat Genet
JAZF1	rs10486567	7p15.1	4e-19	GWASTABLE	28139693	Hoffmann TJ	2017-05-25	Nat Commun
JAZF1	rs1080784	7p15.2-p15.1	2.96x10-10	literature	20406958	Prokunina-Olsson L, Fu YP, Tang W, Jacobs KB, Hayes RB. et al. Refining the prostate cancer genetic association within the JAZF1 gene on chromosome 7p15.2. Cancer Epidemiol Biomarkers Prev. 2010 May;19(5):1349-55.
JAZF1	rs17156041	7p15.2-p15.1	3.19x10-4	literature	21960693	Feng J, Sun J, Kim ST, Lu Y, Wang Z, Zhang Z, Gronberg H, Isaacs WB, Zheng SL, Xu J. A genome-wide survey over the ChIP-on-chip identified androgen receptor-binding genomic regions identifies a novel prostate cancer susceptibility locus at 12q13.13. Cancer Epidemiol Biomarkers Prev. 2011 Nov;20(11):2396-403.
JAZF1	rs38504	7p15.2-p15.1	1.73x10-6	literature	20406958	Prokunina-Olsson L, Fu YP, Tang W, Jacobs KB, Hayes RB. et al. Refining the prostate cancer genetic association within the JAZF1 gene on chromosome 7p15.2. Cancer Epidemiol Biomarkers Prev. 2010 May;19(5):1349-55.
JAZF1	rs7808935	7p15.2-p15.1	2.6x10-4	literature	21637779	Haiman CA, Chen GK, Blot WJ, Strom SS, Berndt SI, Kittles RA. Et al. Characterizing genetic risk at known prostate cancer susceptibility loci in African Americans. PLoS Genet. 2011 May;7(5):e1001387.
JAZF1	rs7808935	7p15.1	3e-11	GWASTABLE	26034056	Hoffmann TJ	2016-07-15	Cancer Discov
JAZF1	rs864745	7p15.2-p15.1	0.03	literature	23193118	Machiela MJ, Lindstr≈m S, Allen NE, Haiman CA, Albanes D, Barricarte A, et al. Association of type 2 diabetes susceptibility variants with advanced prostate cancer risk in the Breast and Prostate Cancer Cohort Consortium. Am J Epidemiol. 2012 Dec 15;176(12):1121-9.
JKAMPP1	rs73408421	9p23	1e-06	GWASTABLE	29356057	Du Z	2018-07-03	Prostate
KCNN3	rs1218582	1q21.3	1.95x10-8	literature	23535732	Eeles RA, Olama AA, Benlloch S, Saunders EJ, Leongamornlert DA, Tymrakiewicz M, et al. Identification of 23 new prostate cancer susceptibility loci using the iCOGS custom genotyping array. Nat Genet. 2013 Apr;45(4):385-91.
KCNN3	rs1218582	1q21.3	1e-08	GWASTABLE	29892016	Schumacher FR	2018-08-14	Nat Genet
KCNQ1	rs231362	11p15.5	0.01	literature	23193118	Machiela MJ, Lindstr≈m S, Allen NE, Haiman CA, Albanes D, Barricarte A, et al. Association of type 2 diabetes susceptibility variants with advanced prostate cancer risk in the Breast and Prostate Cancer Cohort Consortium. Am J Epidemiol. 2012 Dec 15;176(12):1121-9.
KCTD16	rs6580317	5q32	4.66x10-5	literature	19117981	Sun J, Zheng SL, Wiklund F, Isaacs SD, Li G, Wiley KE. Et al. Sequence variants at 22q13 are associated with prostate cancer risk. Cancer Res. 2009 Jan 1;69(1):10-5.
KDM2A	rs12785905	11q13.2	8e-09	GWASTABLE	29892016	Schumacher FR	2018-08-14	Nat Genet
KIAA1211	rs629242	4q12	7.25x10-7	literature	18073375	Duggan D, Zheng SL, Knowlton M, Benitez D, Dimitrov L, Wiklund F, Robbins C. et al. Two genome-wide association studies of aggressive prostate cancer implicate putative prostate tumor suppressor gene DAB2IP. J Natl Cancer Inst. 2007 Dec 19;99(24):1836-44.
KIF13A	rs10456809 x rs10086908	6p22.3 x 8q24.21	5e-06	GWASTABLE	22219177	Tao S	2012-03-31	Carcinogenesis
KIF13A	rs10456809	6p22.3 x 8q24.21	5e-06	GWASTABLE	22219177	Tao S	2012-01-04	Carcinogenesis
KL3	rs11665748	19q13.33	3e-54	GWASTABLE	28139693	Hoffmann TJ	2017-05-25	Nat Commun
KL3	rs266849	19q13.33	4e-17	GWASTABLE	28139693	Hoffmann TJ	2017-05-25	Nat Commun
KL3	rs266868	19q13.33	1e-14	GWASTABLE	28139693	Hoffmann TJ	2017-05-25	Nat Commun
KL3	rs6089829 x rs2735839	20q13.33 x 19q13.33	3e-06	GWASTABLE	22219177	Tao S	2012-03-31	Carcinogenesis
KLF4	rs817826	9q31.2	5e-14	GWASTABLE	23023329	Xu J	2012-09-30	Nat Genet
KLF4	rs817826	9q31.2	5e-14	GWASTABLE	23023329	Xu J	2012-12-11	Nat Genet
KLF5	rs9600079	13q22.1	1e-06	GWASTABLE	26443449	Wang M	2015-10-07	Nat Commun
KLF5	rs9600079	13q22.1	1e-06	GWASTABLE	26443449	Wang M	2016-06-13	Nat Commun
KLF8	rs10855058	Xp11.21	1e-08	GWASTABLE	28139693	Hoffmann TJ	2017-05-25	Nat Commun
KLHL15	rs6627995	Xp22.11	1e-13	GWASTABLE	28139693	Hoffmann TJ	2017-05-25	Nat Commun
KLK13	rs2736433	19q13.33	0.05	literature	21741862	Lose F, Batra J, O'Mara T, Fahey P, Marquart L, Eeles RA, Easton DF, et al. Common variation in Kallikrein genes KLK5, KLK6, KLK12, and KLK13 and risk of prostate cancer and tumor aggressiveness. Urol Oncol. 2011 Jul 7.
KLK15	rs2659056	19q13.4	2.7x10-4	literature	22132073	Batra J, Lose F, O'Mara T, Marquart L, Stephens C, Alexander K, Srinivasan S, Eeles RA, Easton DF, Al Olama AA, Kote-Jarai Z, Guy M, Muir K, Lophatananon A, Rahman AA, Neal DE, Hamdy FC, Donovan JL, Chambers S, Gardiner RA, Aitken J, Yaxley J, Kedda MA, Clements JA, Spurdle AB. Association between Prostinogen (KLK15) genetic variants and prostate cancer risk and aggressiveness in Australia and a …
KLK15	rs2659056	19q13.4	2.7x10-4	literature	22132074	Batra J, Lose F, O'Mara T, Marquart L, Stephens C, Alexander K, Srinivasan S, Eeles RA, Easton DF, Al Olama AA, Kote-Jarai Z, Guy M, Muir K, Lophatananon A, Rahman AA, Neal DE, Hamdy FC, Donovan JL, Chambers S, Gardiner RA, Aitken J, Yaxley J, Kedda MA, Clements JA, Spurdle AB. Association between Prostinogen (KLK15) genetic variants and prostate cancer risk and aggressiveness in Australia and a …
KLK15	rs2659056	19q13.4	0.01	literature	18264097	Eeles RA, Kote-Jarai Z, Giles GG, Olama AA, Guy M, Jugurnauth SK, Mulholland S, Leongamornlert DA, et al. Multiple newly identified loci associated with prostate cancer susceptibility. Nat Genet. 2008 Mar;40(3):316-21.
KLK15	rs2659056	19q13.4	0.001	literature	20690139	Liu H, Wang B, Han C. Meta-analysis of genome-wide and replication association studies on prostate cancer. Prostate. 2011 Feb 1;71(2):209-24.
KLK15	rs2659056	19q13.4	1.2x10-7	literature	19639606	Zhong H, Prentice RL. Correcting "winner's curse" in odds ratios from genomewide association findings for major complex human diseases. Genet Epidemiol. 2010 Jan;34(1):78-91.
KLK15	rs266849	19q13.4	8.04x10-1	literature	18264097	Eeles RA, Kote-Jarai Z, Giles GG, Olama AA, Guy M, Jugurnauth SK, Mulholland S, Leongamornlert DA, et al. Multiple newly identified loci associated with prostate cancer susceptibility. Nat Genet. 2008 Mar;40(3):316-21.
KLK15	rs266870	19q13.4	0.05	literature	22549899	Bensen JT, Xu Z, Smith GJ, Mohler JL, Fontham ET, Taylor JA. Genetic polymorphism and prostate cancer aggressiveness: a case-only study of 1,536 GWAS and candidate SNPs in African-Americans and European-Americans. Prostate. 2013 Jan;73(1):11-22.
KLK2	rs1354774	19q13.33	6e-20	GWASTABLE	23359319	Jin G	2013-01-01	Neoplasia
KLK2	rs1354774	19q13.33	6e-20	GWASTABLE	23359319	Jin G	2013-03-27	Neoplasia
KLK2	rs2735839	19q13.33	0.005	literature	22549899	Bensen JT, Xu Z, Smith GJ, Mohler JL, Fontham ET, Taylor JA. Genetic polymorphism and prostate cancer aggressiveness: a case-only study of 1,536 GWAS and candidate SNPs in African-Americans and European-Americans. Prostate. 2013 Jan;73(1):11-22.
KLK2	rs2735839	19q13.33	5.38x10-2	literature	21372204	Ciampa J, Yeager M, Amundadottir L, Jacobs K, Kraft P, Chung C, et al. Large-scale exploration of gene-gene interactions in prostate cancer using a multistage genome-wide association study. Cancer Res. 2011 May 1;71(9):3287-95.
KLK2	rs2735839	19q13.33	0.04	literature	18264097	Eeles RA, Kote-Jarai Z, Giles GG, Olama AA, Guy M, Jugurnauth SK, Mulholland S, Leongamornlert DA, et al. Multiple newly identified loci associated with prostate cancer susceptibility. Nat Genet. 2008 Mar;40(3):316-21.
KLK2	rs2735839	19q13.33	0.009	literature	20690139	Liu H, Wang B, Han C. Meta-analysis of genome-wide and replication association studies on prostate cancer. Prostate. 2011 Feb 1;71(2):209-24.
KLK2	rs2735839	19q13.33	6e-37	GWASTABLE	23269536	Sun J	2013-03-22	Hum Genet
KLK2	RS2735839?	19q13.33	0.04	literature	19902474	Hooker S, Hernandez W, Chen H, Robbins C, Torres JB, Ahaghotu C, Carpten J, Kittles RA. Replication of prostate cancer risk loci on 8q24, 11q13, 17q12, 19q33, and Xp11 in African Americans. Prostate. 2010 Feb 15;70(3):270-5.
KLK2	rs2739472	19q13.33	8e-10	GWASTABLE	28139693	Hoffmann TJ	2017-01-31	Nat Commun
KLK2	rs2739472	19q13.33	8e-10	GWASTABLE	28139693	Hoffmann TJ	2017-05-25	Nat Commun
KLK2	rs6070	19q13.33	4e-16	GWASTABLE	28139693	Hoffmann TJ	2017-01-31	Nat Commun
KLK2	rs6070	19q13.33	4e-16	GWASTABLE	28139693	Hoffmann TJ	2017-05-25	Nat Commun
KLK3	rs1058205	19q13.41	0.004	literature	22549899	Bensen JT, Xu Z, Smith GJ, Mohler JL, Fontham ET, Taylor JA. Genetic polymorphism and prostate cancer aggressiveness: a case-only study of 1,536 GWAS and candidate SNPs in African-Americans and European-Americans. Prostate. 2013 Jan;73(1):11-22.
KLK3	rs1058205	19q13.41	2.8x10-23	literature	21465221	Kote-Jarai Z, Amin Al Olama A, Leongamornlert D, Tymrakiewicz M, et al. Identification of a novel prostate cancer susceptibility variant in the KLK3 gene transcript. Hum Genet. 2011 Jun;129(6):687-94.
KLK3	rs1058205	19q13.41	0.04	literature	22542949	Kwon EM, Holt SK, Fu R, Kolb S, Williams G, Stanford JL, Ostrander EA. Androgen metabolism and JAK/STAT pathway genes and prostate cancer risk. Cancer Epidemiol. 2012 Aug;36(4):347-53.
KLK3	rs1058205	19q13.33	8e-21	GWASTABLE	24919509	Terao C	2014-06-11	J Med Genet
KLK3	rs1058205	19q13.33	8e-21	GWASTABLE	24919509	Terao C	2014-12-11	J Med Genet
KLK3	rs11665748	19q13.41	3e-54	GWAS Database	28139693	Hoffmann TJ et al 2016
KLK3	rs174776	19q13.41	0.01	literature	22542949	Kwon EM, Holt SK, Fu R, Kolb S, Williams G, Stanford JL, Ostrander EA. Androgen metabolism and JAK/STAT pathway genes and prostate cancer risk. Cancer Epidemiol. 2012 Aug;36(4):347-53.
KLK3	rs17632542	19q13.41	3x10-10	literature	21160077	Gudmundsson J, Besenbacher S, Sulem P, Gudbjartsson DF, Olafsson I, et al. Genetic correction of PSA values using sequence variants associated with PSA levels. Sci Transl Med. 2010 Dec 15;2(62):62ra92.
KLK3	rs17632542	19q13.41	2E-340	GWAS Database	28139693	Hoffmann TJ et al 2016
KLK3	rs17632542	19q13.41	1.6x10-24	literature	21465221	Kote-Jarai Z, Amin Al Olama A, Leongamornlert D, Tymrakiewicz M, et al. Identification of a novel prostate cancer susceptibility variant in the KLK3 gene transcript. Hum Genet. 2011 Jun;129(6):687-94.
KLK3	rs17632542	19q13.33	2e-28	GWASTABLE	24753544	Knipe DW	2014-04-21	Cancer Epidemiol Biomarkers Prev
KLK3	rs17632542	19q13.33	1e-07	GWASTABLE	24740154	Lange EM	2014-04-16	PLoS One
KLK3	rs17632542	19q13.33	2e-28	GWASTABLE	24753544	Knipe DW	2014-11-07	Cancer Epidemiol Biomarkers Prev
KLK3	rs17632542	19q13.33	1e-07	GWASTABLE	24740154	Lange EM	2014-11-09	PLoS One
KLK3	rs17632542	19q13.33	2E-340	GWASTABLE	28139693	Hoffmann TJ	2017-05-25	Nat Commun
KLK3	rs2659051	19q13.41	9e-21	GWAS Database	25434496	Kim S et al. 2014
KLK3	rs2659051	19q13.33	9e-21	GWASTABLE	25434496	Kim S	2015-07-10	Gene
KLK3	RS2659056	19q13.41	0.001	literature	21756274	Liu F, Hsing AW, Wang X, Shao Q, Qi J, Ye Y, Wang Z, Chen H, Gao X, et al. Systematic confirmation study of reported prostate cancer risk-associated single nucleotide polymorphisms in Chinese men. Cancer Sci. 2011 Oct;102(10):1916-20.
KLK3	rs2659124	19q13.33	1e-13	GWASTABLE	26034056	Hoffmann TJ	2015-06-01	Cancer Discov
KLK3	rs2659124	19q13.33	1e-13	GWASTABLE	26034056	Hoffmann TJ	2016-07-15	Cancer Discov
KLK3	rs266849	19q13.41	8.04x10-1	literature	18264097	Eeles RA, Kote-Jarai Z, Giles GG, Olama AA, Guy M, Jugurnauth SK, Mulholland S, Leongamornlert DA, et al. Multiple newly identified loci associated with prostate cancer susceptibility. Nat Genet. 2008 Mar;40(3):316-21.
KLK3	rs266849	19q13.41	4e-17	GWAS Database	28139693	Hoffmann TJ et al 2016
KLK3	rs266849	19q13.41	1.4x10-14	literature	21465221	Kote-Jarai Z, Amin Al Olama A, Leongamornlert D, Tymrakiewicz M, et al. Identification of a novel prostate cancer susceptibility variant in the KLK3 gene transcript. Hum Genet. 2011 Jun;129(6):687-94.
KLK3	rs266849	19q13.41	0.008	literature	21390317	Lindstrom S, Schumacher F, Siddiq A, Travis RC, Campa D, et al. Characterizing associations and SNP-environment interactions for GWAS-identified prostate cancer risk markers--results from BPC3. PLoS One. 2011 Feb 24;6(2):e17142.
KLK3	rs266868	19q13.41	1e-14	GWAS Database	28139693	Hoffmann TJ et al 2016
KLK3	rs266877	19q13.41	0.02	literature	21421545	Penney KL, Schumacher FR, Kraft P, Mucci LA, Sesso HD, Ma J, Niu Y, Cheong JK, Hunter DJ, Stampfer MJ, Hsu SI. Association of KLK3 (PSA) genetic variants with prostate cancer risk and PSA levels. Carcinogenesis. 2011 Jun;32(6):853-9.
KLK3	rs2735839	19q13.41	1.5x10-18	literature	18264097	Eeles RA, Kote-Jarai Z, Giles GG, Olama AA, Guy M, Jugurnauth SK, Mulholland S, Leongamornlert DA, et al. Multiple newly identified loci associated with prostate cancer susceptibility. Nat Genet. 2008 Mar;40(3):316-21.
KLK3	rs2735839	19q13.41	0.04	literature	19366831	Fitzgerald LM, Kwon EM, Koopmeiners JS, Salinas CA, Stanford JL, Ostrander EA. Analysis of recently identified prostate cancer susceptibility loci in a population-based study: associations with family history and clinical features. Clin Cancer Res. 2009 May 1;15(9):3231-7.
KLK3	rs2735839	19q13.41	0.007	literature	20460480	Gallagher DJ, Vijai J, Cronin AM, Bhatia J, Vickers AJ. Et al. Susceptibility loci associated with prostate cancer progression and mortality. Clin Cancer Res. 2010 May 15;16(10):2819-32.
KLK3	rs2735839	19q13.41	0.02	literature	19767754	Gudmundsson J, Sulem P, Gudbjartsson DF, Blondal T, Gylfason A, Agnarsson BA. Et al. Genome-wide association and replication studies identify four variants associated with prostate cancer susceptibility. Nat Genet. 2009 Oct;41(10):1122-6.
KLK3	rs2735839	19q13.41	0.04	literature	19902474	Hooker S, Hernandez W, Chen H, Robbins C, Torres JB, Ahaghotu C, Carpten J, Kittles RA. Replication of prostate cancer risk loci on 8q24, 11q13, 17q12, 19q33, and Xp11 in African Americans. Prostate. 2010 Feb 15;70(3):270-5.
KLK3	rs2735839	19q13.41	8.4x10-7	literature	19434657	Kader AK, Sun J, Isaacs SD, Wiley KE, Yan G, Kim ST, Fedor H, DeMarzo AM, et al. Individual and cumulative effect of prostate cancer risk-associated variants on clinicopathologic variables in 5,895 prostate cancer patients. Prostate. 2009 Aug 1;69(11):1195-205.
KLK3	rs2735839	19q13.41	7.47x10-4	literature	20564319	Kim ST, Cheng Y, Hsu FC, Jin T, Kader AK, Zheng SL, Isaacs WB, Xu J, Sun J. Prostate cancer risk-associated variants reported from genome-wide association studies: meta-analysis and their contribution to genetic Variation. Prostate. 2010 Dec 1;70(16):1729-38.
KLK3	rs2735839	19q13.41	1.1x10-22	literature	21465221	Kote-Jarai Z, Amin Al Olama A, Leongamornlert D, Tymrakiewicz M, et al. Identification of a novel prostate cancer susceptibility variant in the KLK3 gene transcript. Hum Genet. 2011 Jun;129(6):687-94.
KLK3	rs2735839	19q13.41	0.0007	literature	18708398	Kote-Jarai Z, Easton DF, Stanford JL, Ostrander EA, Schleutker J, Ingles SA, et al. Multiple novel prostate cancer predisposition loci confirmed by an international study: the PRACTICAL Consortium. Cancer Epidemiol Biomarkers Prev. 2008 Aug;17(8):2052-61.
KLK3	rs2735839	19q13.41	3.05x10-6	literature	21390317	Lindstrom S, Schumacher F, Siddiq A, Travis RC, Campa D, et al. Characterizing associations and SNP-environment interactions for GWAS-identified prostate cancer risk markers--results from BPC3. PLoS One. 2011 Feb 24;6(2):e17142.
KLK3	rs2735839	19q13.41	6.45x10-37	literature	23269536	Sun J, Tao S, Gao Y, Peng T, Tan A, Zhang H, Yang X, Qin X, Hu Y, et al. Genome-wide association study identified novel genetic variant on SLC45A3 gene associated with serum levels prostate-specific antigen (PSA) in a Chinese population. Hum Genet. 2013 Apr;132(4):423-9.
KLK3	rs2735839	19q13.41	0.05	literature	22459122	Tsilidis KK, Travis RC, Appleby PN, Allen NE, Lindstrom S, Schumacher FR, et al. Interactions between genome-wide significant genetic variants and circulating concentrations of insulin-like growth factor 1, sex hormones, and binding proteins in relation to prostate cancer risk in the National Cancer Institute Breast and Prostate Cancer Cohort Consortium. Am J Epidemiol. 2012 May 1;175(9):926-35.
KLK3	rs2735839	19q13.41	0.05	literature	19116992	Wiklund F, Zheng SL, Sun J, Adami HO, Lilja H, Hsu FC, et al. Association of reported prostate cancer risk alleles with PSA levels among men without a diagnosis of prostate cancer. Prostate. 2009 Mar 1;69(4):419-27.
KLK3	rs2735839	19q13.41	0.01	literature	21456070	Xu Z, Bensen JT, Smith GJ, Mohler JL, Taylor JA. GWAS SNP Replication among African American and European American men in the North Carolina-Louisiana prostate cancer project (PCaP). Prostate. 2011 Jun 1;71(8):881-91.
KLK3	rs2735839	19q13.41	2.4x10-20	literature	19639606	Zhong H, Prentice RL. Correcting "winner's curse" in odds ratios from genomewide association findings for major complex human diseases. Genet Epidemiol. 2010 Jan;34(1):78-91.
KLK3	rs2735839	19q13.33	2e-18	GWASTABLE	18264097	Eeles RA	2008-06-16	Nat Genet
KLK3	rs2735839	19q13.33	6e-09	GWASTABLE	26034056	Hoffmann TJ	2016-07-15	Cancer Discov
KLK3	rs2735839	19q13.33	3e-47	GWASTABLE	29892016	Schumacher FR	2018-08-14	Nat Genet
KLK3	rs2739472; rs6070; rs11665748; rs17632542; rs266849; rs266868; rs61752561	19q13.41	9e-186	GWAS Database	28139693	Hoffmann TJ et al 2016
KLK3	rs2739472; rs6070; rs11665748; rs17632542; rs266849; rs266868; rs61752561	19q13.33	9e-186	GWASTABLE	28139693	Hoffmann TJ	2017-05-25	Nat Commun
KLK3	rs2739472; rs6070; rs11665748; rs17632542; rs266849; rs266868; rs61752561	19q13.33	2e-111	GWASTABLE	28139693	Hoffmann TJ	2017-05-25	Nat Commun
KLK3	rs2739472; rs6070; rs11665748; rs17632542; rs266849; rs266868; rs61752561	19q13.33	8e-17	GWASTABLE	28139693	Hoffmann TJ	2017-05-25	Nat Commun
KLK3	rs2739472; rs6070; rs11665748; rs17632542; rs266849; rs266868; rs61752561	19q13.33	1e-85	GWASTABLE	28139693	Hoffmann TJ	2017-05-25	Nat Commun
KLK3	rs2739472; rs6070; rs11665748; rs17632542; rs266849; rs266868; rs61752561	19q13.33	4e-09	GWASTABLE	28139693	Hoffmann TJ	2017-05-25	Nat Commun
KLK3	rs2739472; rs6070; rs11665748; rs17632542; rs266849; rs266868; rs61752561	19q13.33	1e-07	GWASTABLE	28139693	Hoffmann TJ	2017-05-25	Nat Commun
KLK3	rs2739472; rs6070; rs11665748; rs17632542; rs266849; rs266868; rs61752561	19q13.33	8e-10	GWASTABLE	28139693	Hoffmann TJ	2017-05-25	Nat Commun
KLK3	rs2739472; rs6070; rs11665748; rs17632542; rs266849; rs266868; rs61752561	19q13.33	3e-11	GWASTABLE	28139693	Hoffmann TJ	2017-05-25	Nat Commun
KLK3	rs2739472; rs6070; rs11665748; rs17632542; rs266849; rs266868; rs61752561	19q13.33	2e-45	GWASTABLE	28139693	Hoffmann TJ	2017-05-25	Nat Commun
KLK3	rs3760722	19q13.41	1.5x10-3	literature	21637779	Haiman CA, Chen GK, Blot WJ, Strom SS, Berndt SI, Kittles RA. Et al. Characterizing genetic risk at known prostate cancer susceptibility loci in African Americans. PLoS Genet. 2011 May;7(5):e1001387.
KLK3	rs61752561	19q13.41	0.0005	literature	20460480	Gallagher DJ, Vijai J, Cronin AM, Bhatia J, Vickers AJ. Et al. Susceptibility loci associated with prostate cancer progression and mortality. Clin Cancer Res. 2010 May 15;16(10):2819-32.
KLK3	rs61752561	19q13.41	2e-25	GWAS Database	28139693	Hoffmann TJ et al 2016
KLK3	rs61752561	19q13.33	2e-25	GWASTABLE	28139693	Hoffmann TJ	2017-05-25	Nat Commun
KLK3	rs62113212	19q13.33	6e-09	GWASTABLE	25939597	Berndt SI	2015-05-05	Nat Commun
KLK3	rs62113212	19q13.33	6e-09	GWASTABLE	25939597	Berndt SI	2016-02-13	Nat Commun
KLK3	rs2735839	19q13.33	2e-08	GWASTABLE	26034056	Hoffmann TJ	2016-07-15	Cancer Discov
KLK5	rs268908	19q13.33	0.001	literature	21741862	Lose F, Batra J, O'Mara T, Fahey P, Marquart L, Eeles RA, Easton DF, et al. Common variation in Kallikrein genes KLK5, KLK6, KLK12, and KLK13 and risk of prostate cancer and tumor aggressiveness. Urol Oncol. 2011 Jul 7.
KRT18P38	rs77777548	6p22.3	3e-08	GWASTABLE	29892016	Schumacher FR	2018-08-14	Nat Genet
KRT78	rs902774	12q13.13	2e-31	GWASTABLE	29892016	Schumacher FR	2018-08-14	Nat Genet
KRT78	rs902774	12q13.13	1e-07	GWASTABLE	26034056	Hoffmann TJ	2016-07-15	Cancer Discov
KRT78	rs902774	12q13.13	9e-08	GWASTABLE	26034056	Hoffmann TJ	2016-07-15	Cancer Discov
KRT8	rs4919743	12q13.13	3.64x10-4	literature	21960693	Feng J, Sun J, Kim ST, Lu Y, Wang Z, Zhang Z, Gronberg H, Isaacs WB, Zheng SL, Xu J. A genome-wide survey over the ChIP-on-chip identified androgen receptor-binding genomic regions identifies a novel prostate cancer susceptibility locus at 12q13.13. Cancer Epidemiol Biomarkers Prev. 2011 Nov;20(11):2396-403.
KRT8	rs902774	12q13.13	0.003	literature	21743057	Schumacher FR, Berndt SI, Siddiq A, Jacobs KB. Et al. Genome-wide association study identifies new prostate cancer susceptibility loci. Hum Mol Genet. 2011 Oct 1;20(19):3867-75.
KRT8	rs902774	12q13.13	5e-09	GWASTABLE	21743057	Schumacher FR	2011-07-30	Hum Mol Genet
LACE1	rs2273669	6q21	8e-09	GWASTABLE	23535732	Eeles RA	2013-04-01	Nat Genet
LACE1	rs2273669	6q21	8e-09	GWASTABLE	23535732	Eeles RA	2013-09-16	Nat Genet
LARP4B	rs141536087	10p15.3	9e-13	GWASTABLE	29892016	Schumacher FR	2018-08-14	Nat Genet
LARP4B	rs141536087	10p15.3	5e-06	GWASTABLE	29892016	Schumacher FR	2018-08-14	Nat Genet
LARP4B	rs141536087	10p15.3	4e-06	GWASTABLE	29892016	Schumacher FR	2018-08-14	Nat Genet
LARP7P4	rs345013	3q24	5e-06	GWASTABLE	17903305	Murabito JM	2008-09-17	BMC Med Genet
LCLAT1	rs114997855	2p23.1	1e-07	GWASTABLE	26307654	Szulkin R	2016-08-22	Cancer Epidemiol Biomarkers Prev
LILRA3	rs103294	19q13.4	5.34x10-16	literature	23023329	Xu J, Mo Z, Ye D, Wang M, Liu F, Jin G, Xu C, Wang X, et al. Genome-wide association study in Chinese men identifies two new prostate cancer risk loci at 9q31.2 and 19q13.4. Nat Genet. 2012 Nov;44(11):1231-5.
LILRA3	rs103294	19q13.42	5e-16	GWASTABLE	23023329	Xu J	2012-12-11	Nat Genet
LINC00506	rs17023900	3p12.1	1e-11	GWASTABLE	25939597	Berndt SI	2015-05-05	Nat Commun
LINC00506	rs17181170	3p11.2	3e-08	GWASTABLE	19767753	Eeles RA	2009-12-29	Nat Genet
LINC00506	rs9284813	3p11.2	5e-09	GWASTABLE	20676098	Takata R	2010-09-11	Nat Genet
LINC01162	rs12155172	7p15.3	9e-06	GWASTABLE	19767753	Eeles RA	2009-12-29	Nat Genet
LINC01162	rs12155172	7p15.3	9e-23	GWASTABLE	29892016	Schumacher FR	2018-08-14	Nat Genet
LMO4	rs6662386	1p22.3	7e-20	GWASTABLE	28139693	Hoffmann TJ	2017-01-31	Nat Commun
LMO4	rs6662386	1p22.3	7e-20	GWASTABLE	28139693	Hoffmann TJ	2017-05-25	Nat Commun
LMTK2	rs6465657	7q22.1	0.007	literature	20450899	Bao BY, Pao JB, Lin VC, Huang CN, Chang TY. Et al. Individual and cumulative association of prostate cancer susceptibility variants with clinicopathologic characteristics of the disease. Clin Chim Acta. 2010 Sep 6;411(17-18):1232-7.
LMTK2	rs6465657	7q22.1	1.1x10-9	literature	18264097	Eeles RA, Kote-Jarai Z, Giles GG, Olama AA, Guy M, Jugurnauth SK, Mulholland S, Leongamornlert DA, et al. Multiple newly identified loci associated with prostate cancer susceptibility. Nat Genet. 2008 Mar;40(3):316-21.
LMTK2	rs6465657	7q22.1	7.9x10-3	literature	19366831	Fitzgerald LM, Kwon EM, Koopmeiners JS, Salinas CA, Stanford JL, Ostrander EA. Analysis of recently identified prostate cancer susceptibility loci in a population-based study: associations with family history and clinical features. Clin Cancer Res. 2009 May 1;15(9):3231-7.
LMTK2	rs6465657	7q22.1	1.42x10-3	literature	20564319	Kim ST, Cheng Y, Hsu FC, Jin T, Kader AK, Zheng SL, Isaacs WB, Xu J, Sun J. Prostate cancer risk-associated variants reported from genome-wide association studies: meta-analysis and their contribution to genetic Variation. Prostate. 2010 Dec 1;70(16):1729-38.
LMTK2	rs6465657	7q22.1	7x10-6	literature	18708398	Kote-Jarai Z, Easton DF, Stanford JL, Ostrander EA, Schleutker J, Ingles SA, et al. Multiple novel prostate cancer predisposition loci confirmed by an international study: the PRACTICAL Consortium. Cancer Epidemiol Biomarkers Prev. 2008 Aug;17(8):2052-61.
LMTK2	rs6465657	7q22.1	1.52x10-7	literature	21390317	Lindstrom S, Schumacher F, Siddiq A, Travis RC, Campa D, et al. Characterizing associations and SNP-environment interactions for GWAS-identified prostate cancer risk markers--results from BPC3. PLoS One. 2011 Feb 24;6(2):e17142.
LMTK2	rs6465657	7q22.1	2e-08	nggri	20676098	Takata R, Akamatsu S, Kubo M, Genome-wide association study identifies five new susceptibility loci for prostate cancer in the Japanese population. 2010 Sep;42(9):751-4.
LMTK2	rs6465657	7q22.1	0.02	literature	22459122	Tsilidis KK, Travis RC, Appleby PN, Allen NE, Lindstrom S, Schumacher FR, et al. Interactions between genome-wide significant genetic variants and circulating concentrations of insulin-like growth factor 1, sex hormones, and binding proteins in relation to prostate cancer risk in the National Cancer Institute Breast and Prostate Cancer Cohort Consortium. Am J Epidemiol. 2012 May 1;175(9):926-35.
LMTK2	rs6465657	7q22.1	0.02	literature	21829199	Vijai J, Kirchhoff T, Gallagher D, Hamel N, Guha S, Darvasi A, et al. Genetic architecture of prostate cancer in the Ashkenazi Jewish population. Br J Cancer. 2011 Sep 6;105(6):864-9.
LMTK2	rs6465657	7q22.1	1.2x10-8	literature	19639606	Zhong H, Prentice RL. Correcting "winner's curse" in odds ratios from genomewide association findings for major complex human diseases. Genet Epidemiol. 2010 Jan;34(1):78-91.
LMTK2	rs6465657	7q21.3	1e-09	GWASTABLE	18264097	Eeles RA	2008-06-16	Nat Genet
LMTK2	rs6465657	7q21.3	2e-08	GWASTABLE	19767753	Eeles RA	2009-12-29	Nat Genet
LMTK2	rs6465657	7q21.3	7e-37	GWASTABLE	29892016	Schumacher FR	2018-08-14	Nat Genet
LOC100505495	rs887391	19	3.2x10-7	literature	19318370	Hsu FC, Sun J, Wiklund F, Isaacs SD, Wiley KE, et al. A novel prostate cancer susceptibility locus at 19q13. Cancer Res. 2009 Apr 1;69(7):2720-3.
LOC100505495	rs887391	19	6.86x10-7	literature	20564319	Kim ST, Cheng Y, Hsu FC, Jin T, Kader AK, Zheng SL, Isaacs WB, Xu J, Sun J. Prostate cancer risk-associated variants reported from genome-wide association studies: meta-analysis and their contribution to genetic Variation. Prostate. 2010 Dec 1;70(16):1729-38.
LOC285232	rs2660753	3p12.1	4.88x10-1	literature	18264097	Eeles RA, Kote-Jarai Z, Giles GG, Olama AA, Guy M, Jugurnauth SK, Mulholland S, Leongamornlert DA, et al. Multiple newly identified loci associated with prostate cancer susceptibility. Nat Genet. 2008 Mar;40(3):316-21.
LOC285830	rs2523395	6p22.1 x 8p21.2	2e-06	GWASTABLE	22219177	Tao S	2012-01-04	Carcinogenesis
LOC338694	rs7929962	11q13.3	2e-13	GWASTABLE	25939597	Berndt SI	2015-05-05	Nat Commun
LOC340602	rs5945572	Xp11.22	4e-13	GWASTABLE	18264098	Gudmundsson J	2008-02-10	Nat Genet
LOC63930	rs6089829	20q13.33 x 19q13.33	3e-06	GWASTABLE	22219177	Tao S	2012-01-04	Carcinogenesis
LOC727677	rs13282506	8q24.21	3.8x10-4	literature	21637779	Haiman CA, Chen GK, Blot WJ, Strom SS, Berndt SI, Kittles RA. Et al. Characterizing genetic risk at known prostate cancer susceptibility loci in African Americans. PLoS Genet. 2011 May;7(5):e1001387.
LOC727677	rs1447295	8q24.21	0.01	literature	16682969	Amundadottir LT, Sulem P, Gudmundsson J, Helgason A, Baker A. et al. A common variant associated with prostate cancer in European and African populations. Nat Genet. 2006 Jun;38(6):652-8.
LOC727677	rs1447295	8q24.21	0.01	literature	20450899	Bao BY, Pao JB, Lin VC, Huang CN, Chang TY. Et al. Individual and cumulative association of prostate cancer susceptibility variants with clinicopathologic characteristics of the disease. Clin Chim Acta. 2010 Sep 6;411(17-18):1232-7.
LOC727677	rs1447295	8q24.21	2.9x10-4	literature	19567509	Breyer JP, McReynolds KM, Yaspan BL, Bradley KM, Dupont WD, Smith JR. Genetic variants and prostate cancer risk: candidate replication and exploration of viral restriction genes. Cancer Epidemiol Biomarkers Prev. 2009 Jul;18(7):2137-44.
LOC727677	rs1447295	8q24.21	2.2x10-19	literature	19767754	Gudmundsson J, Sulem P, Gudbjartsson DF, Blondal T, Gylfason A, Agnarsson BA. Et al. Genome-wide association and replication studies identify four variants associated with prostate cancer susceptibility. Nat Genet. 2009 Oct;41(10):1122-6.
LOC727677	rs1447295	8q24.21	6.4x10-18	literature	17603485	Gudmundsson J, Sulem P, Steinthorsdottir V, Bergthorsson JT, Thorleifsson G, Manolescu A, Rafnar T, et al. Two variants on chromosome 17 confer prostate cancer risk, and the one in TCF2 protects against type 2 diabetes. Nat Genet. 2007 Aug;39(8):977-83. Epub 2007 Jul 1.
LOC727677	rs1447295	8q24.21	0.03	literature	19900942	Huang SP, Huang LC, Ting WC, Chen LM, Chang TY, Lu TL, Lan YH, Liu CC, Yang WH, Lee HZ, Hsieh CJ, Bao BY. Prognostic significance of prostate cancer susceptibility variants on prostate-specific antigen recurrence after radical prostatectomy. Cancer Epidemiol Biomarkers Prev. 2009 Nov;18(11):3068-74.
LOC727677	rs1447295	8q24.21	3.82x10-14	literature	20564319	Kim ST, Cheng Y, Hsu FC, Jin T, Kader AK, Zheng SL, Isaacs WB, Xu J, Sun J. Prostate cancer risk-associated variants reported from genome-wide association studies: meta-analysis and their contribution to genetic Variation. Prostate. 2010 Dec 1;70(16):1729-38.
LOC727677	rs1447295	8q24.21	0.04	literature	20978189	Koutros S, Beane Freeman LE, Berndt SI, Andreotti G, Lubin JH, Sandler DP. Et al. Pesticide use modifies the association between genetic variants on chromosome 8q24 and prostate cancer. Cancer Res. 2010 Nov 15;70(22):9224-33.
LOC727677	rs1447295	8q24.21	0.008	literature	22099997	Liu M, Wang J, Xu Y, Wei D, Shi X, Yang Z. Risk loci on chromosome 8q24 are associated with prostate cancer in northern Chinese men. J Urol. 2012 Jan;187(1):315-21.
LOC727677	rs1447295	8q24.21	0.004	literature	22077888	McGuire BB, Helfand BT, Kundu S, Hu Q, Banks JA, Cooper P, Catalona WJ. Association of prostate cancer risk alleles with unfavourable pathological characteristics in potential candidates for active surveillance. BJU Int. 2012 Aug;110(3):338-43.
LOC727677	rs1447295	8q24.21	0.01	literature	18625567	Meyer A, Sch?rmann P, Ghahremani M, Kocak E, Brinkhaus MJ, Bremer M, Karstens JH, Hagemann J, Machtens S, D≈rk T. Association of chromosomal locus 8q24 and risk of prostate cancer: a hospital-based study of German patients treated with brachytherapy. Urol Oncol. 2009 Jul-Aug;27(4):373-6.
LOC727677	rs1447295	8q24.21	2.5x10-5	literature	21557270	Okobia MN, Zmuda JM, Ferrell RE, Patrick AL, Bunker CH. Chromosome 8q24 variants are associated with prostate cancer risk in a high risk population of African ancestry. Prostate. 2011 Jul;71(10):1054-63.
LOC727677	rs1447295	8q24.21	0.001	literature	18483343	Salinas CA, Kwon E, Carlson CS, Koopmeiners JS, et al. Multiple independent genetic variants in the 8q24 region are associated with prostate cancer risk. Cancer Epidemiol Biomarkers Prev. 2008 May;17(5):1203-13.
LOC727677	rs1447295	8q24.21	0.008	literature	19726753	Yamada H, Penney KL, Takahashi H, Katoh T, Yamano Y, et al. Replication of prostate cancer risk loci in a Japanese case-control association study. J Natl Cancer Inst. 2009 Oct 7;101(19):1330-6.
LOC727677	rs1447295	8q24.21	1.53x10-14	literature	17401363	Yeager M, Orr N, Hayes RB, Jacobs KB, Kraft P, Wacholder S, et al. Genome-wide association study of prostate cancer identifies a second risk locus at 8q24. Nat Genet. 2007 May;39(5):645-9.
LOC727677	rs1447295	8q24.21	4e-23	GWASTABLE	26443449	Wang M	2015-10-07	Nat Commun
LOC727677	rs4242382	8q24.21	1e-34	GWASTABLE	25939597	Berndt SI	2015-05-05	Nat Commun
LOC727677	rs6470517	8q24.21	7.6x10-4	literature	19562729	Pal P, Xi H, Guha S, Sun G, Helfand BT, Meeks JJ, Suarez BK, Catalona WJ, Deka R. Common variants in 8q24 are associated with risk for prostate cancer and tumor aggressiveness in men of European ancestry. Prostate. 2009 Oct 1;69(14):1548-56.
LOC729852	rs13225697	7p21.3	0.008	literature	17876339	Nam RK, Zhang WW, Loblaw DA, Klotz LH, Trachtenberg J, Jewett MA, et al. A genome-wide association screen identifies regions on chromosomes 1q25 and 7p21 as risk loci for sporadic prostate cancer. Prostate Cancer Prostatic Dis. 2008;11(3):241-6.
LOC729852	rs2348763	7p21.3	0.01	literature	17876339	Nam RK, Zhang WW, Loblaw DA, Klotz LH, Trachtenberg J, Jewett MA, et al. A genome-wide association screen identifies regions on chromosomes 1q25 and 7p21 as risk loci for sporadic prostate cancer. Prostate Cancer Prostatic Dis. 2008;11(3):241-6.
LRP1B	rs10210358	2q21.2	2e-06	erdisfanct/nggri	20932654	Kerns SL, Ostrer H, Stock R, Genome-wide association study to identify single nucleotide polymorphisms (SNPs) associated with the development of erectile dysfunction in African-American men after radiotherapy for prostate cancer. 2010 Dec 1;78(5):1292-300.
LRRN2	rs4245739	1q32.1	2e-11	GWASTABLE	23535732	Eeles RA	2013-04-01	Nat Genet
LRRN2	rs4245739	1q32.1	2e-11	GWASTABLE	23535732	Eeles RA	2013-09-16	Nat Genet
MAD1L1	rs527510716	7p22.3	5e-08	GWASTABLE	29892016	Schumacher FR	2018-08-14	Nat Genet
MAD1L1	rs527510716	7p22.3	3e-07	GWASTABLE	29892016	Schumacher FR	2018-08-14	Nat Genet
MAML3	rs736349	4q28	0.002	literature	18073375	Duggan D, Zheng SL, Knowlton M, Benitez D, Dimitrov L, Wiklund F, Robbins C. et al. Two genome-wide association studies of aggressive prostate cancer implicate putative prostate tumor suppressor gene DAB2IP. J Natl Cancer Inst. 2007 Dec 19;99(24):1836-44.
MAP2K1	rs112293876	15q22.31	4e-10	GWASTABLE	29892016	Schumacher FR	2018-08-14	Nat Genet
MBD2	rs8093601	18q21.2	2e-08	GWASTABLE	29892016	Schumacher FR	2018-08-14	Nat Genet
MBNL1	rs182314334	3q25.1	4e-11	GWASTABLE	29892016	Schumacher FR	2018-08-14	Nat Genet
MDM4	rs4245739	1q32	2.01x10-11	literature	23535732	Eeles RA, Olama AA, Benlloch S, Saunders EJ, Leongamornlert DA, Tymrakiewicz M, et al. Identification of 23 new prostate cancer susceptibility loci using the iCOGS custom genotyping array. Nat Genet. 2013 Apr;45(4):385-91.
MDM4	rs4245739	1q32.1	3e-24	GWASTABLE	29892016	Schumacher FR	2018-08-14	Nat Genet
MECOM	rs142436749	3q26.2	5e-09	GWASTABLE	29892016	Schumacher FR	2018-08-14	Nat Genet
MEIS1	rs74702681	2p14	2e-09	GWASTABLE	29892016	Schumacher FR	2018-08-14	Nat Genet
MIR4319	rs998124 x rs10934853	18q12.3 x 3q21.3	5e-06	GWASTABLE	22219177	Tao S	2012-03-31	Carcinogenesis
MIR4319 x EEFSEC	rs998124 x rs10934853	18q12.3 x 3q21.3	5e-06	GWASTABLE	22219177	Tao S	2012-01-04	Carcinogenesis
MIR4795	rs7629490	3p11.2	1e-07	GWASTABLE	21743057	Schumacher FR	2011-07-30	Hum Mol Genet
MIR622	rs16944141 x rs1512268	13q31.3 x 8p21.2	3e-06	GWASTABLE	22219177	Tao S	2012-03-31	Carcinogenesis
MIR622 x NKX3.1	rs16944141 x rs1512268	13q31.3 x 8p21.2	3e-06	GWASTABLE	22219177	Tao S	2012-01-04	Carcinogenesis
MIR656	rs2400997 x rs10934853	14q32.31 x 3q21.3	3e-06	GWASTABLE	22219177	Tao S	2012-03-31	Carcinogenesis
MIR656 x EEFSEC	rs2400997 x rs10934853	14q32.31 x 3q21.3	3e-06	GWASTABLE	22219177	Tao S	2012-01-04	Carcinogenesis
MLPH	rs2292884	2q37.2	4e-08	nggri	19767753	Eeles RA, Kote-Jarai Z, Al Olama AA, Identification of seven new prostate cancer susceptibility loci through a genome-wide association study. 2009 Oct;41(10):1116-21
MLPH	rs2292884	2q37.2	0.001	literature	21743467	Kote-Jarai Z, Olama AA, Giles GG, Severi G, Schleutker J, Weischer M, Campa D, et al. Seven prostate cancer susceptibility loci identified by a multi-stage genome-wide association study. Nat Genet. 2011 Jul 10;43(8):785-91.
MLPH	rs2292884	2q37.2	4.3x10-8	literature	21743057	Schumacher FR, Berndt SI, Siddiq A, Jacobs KB. Et al. Genome-wide association study identifies new prostate cancer susceptibility loci. Hum Mol Genet. 2011 Oct 1;20(19):3867-75.
MLPH	rs2292884	2q37.3	4e-08	GWASTABLE	21743057	Schumacher FR	2011-07-30	Hum Mol Genet
MLPH	rs2292884	2q37.3	4e-11	GWASTABLE	29892016	Schumacher FR	2018-08-14	Nat Genet
MMP14	rs1004030	14q11.2	2e-08	GWASTABLE	29892016	Schumacher FR	2018-08-14	Nat Genet
MMP7	rs11568818	11q21-q22	1.56x10-11	literature	23535732	Eeles RA, Olama AA, Benlloch S, Saunders EJ, Leongamornlert DA, Tymrakiewicz M, et al. Identification of 23 new prostate cancer susceptibility loci using the iCOGS custom genotyping array. Nat Genet. 2013 Apr;45(4):385-91.
MMP7	rs11568818	11q22.2	2e-19	GWASTABLE	29892016	Schumacher FR	2018-08-14	Nat Genet
MMP7	rs12285347	11q22.2	8e-12	GWASTABLE	28139693	Hoffmann TJ	2017-01-31	Nat Commun
MMP7	rs12285347	11q22.2	8e-12	GWASTABLE	28139693	Hoffmann TJ	2017-05-25	Nat Commun
MMP8	rs11568818	11q22.2	2e-11	GWASTABLE	23535732	Eeles RA	2013-04-01	Nat Genet
MMP8	rs11568818	11q22.2	2e-11	GWASTABLE	23535732	Eeles RA	2013-09-16	Nat Genet
MN1	rs6005451	22q12.1 x 8q24.21	4e-06	GWASTABLE	22219177	Tao S	2012-01-04	Carcinogenesis
MN1	rs6005451 x rs445114	22q12.1 x 8q24.21	4e-06	GWASTABLE	22219177	Tao S	2012-03-31	Carcinogenesis
MOB2	rs1881502	11p15.5	7e-09	GWASTABLE	29892016	Schumacher FR	2018-08-14	Nat Genet
MSMB	RS0993994	10q11.2	0.005-0.001, 8.7x10-29	literature	21071540	Chang BL, Spangler E, Gallagher S, Haiman CA, Henderson B, Isaacs W. et al. Validation of genome-wide prostate cancer associations in men of African descent. Cancer Epidemiol Biomarkers Prev. 2011 Jan;20(1):23-32.
MSMB	rs10993994	10q11.2	0.01	literature	21343373	Ahn J, Kibel AS, Park JY, Rebbeck TR, Rennert H, et al. Prostate cancer predisposition loci and risk of metastatic disease and prostate cancer recurrence. Clin Cancer Res. 2011 Mar 1;17(5):1075-81.
MSMB	rs10993994	10q11.2	0.01	literature	20450899	Bao BY, Pao JB, Lin VC, Huang CN, Chang TY. Et al. Individual and cumulative association of prostate cancer susceptibility variants with clinicopathologic characteristics of the disease. Clin Chim Acta. 2010 Sep 6;411(17-18):1232-7.
MSMB	rs10993994	10q11.2	0.02	literature	19336566	Camp NJ, Farnham JM, Wong J, Christensen GB, Thomas A, Cannon-Albright LA. Replication of the 10q11 and Xp11 prostate cancer risk variants: results from a Utah pedigree-based study. Cancer Epidemiol Biomarkers Prev. 2009 Apr;18(4):1290-4.
MSMB	rs10993994	10q11.2	7.7x10-15	literature	19153072	Chang BL, Cramer SD, Wiklund F, Isaacs SD, Stevens VL, et al. Fine mapping association study and functional analysis implicate a SNP in MSMB at 10q11 as a causal variant for prostate cancer risk. Hum Mol Genet. 2009 Apr 1;18(7):1368-75.
MSMB	rs10993994	10q11.2	0.005	literature	21071540	Chang BL, Spangler E, Gallagher S, Haiman CA, Henderson B, Isaacs W. et al. Validation of genome-wide prostate cancer associations in men of African descent. Cancer Epidemiol Biomarkers Prev. 2011 Jan;20(1):23-32.
MSMB	rs10993994	10q11.2	7.47x10-13	literature	21372204	Ciampa J, Yeager M, Amundadottir L, Jacobs K, Kraft P, Chung C, et al. Large-scale exploration of gene-gene interactions in prostate cancer using a multistage genome-wide association study. Cancer Res. 2011 May 1;71(9):3287-95.
MSMB	rs10993994	10q11.2	8.7x10-29	literature	18264097	Eeles RA, Kote-Jarai Z, Giles GG, Olama AA, Guy M, Jugurnauth SK, Mulholland S, Leongamornlert DA, et al. Multiple newly identified loci associated with prostate cancer susceptibility. Nat Genet. 2008 Mar;40(3):316-21.
MSMB	rs10993994	10q11.2	3.7x10-6	literature	19366831	Fitzgerald LM, Kwon EM, Koopmeiners JS, Salinas CA, Stanford JL, Ostrander EA. Analysis of recently identified prostate cancer susceptibility loci in a population-based study: associations with family history and clinical features. Clin Cancer Res. 2009 May 1;15(9):3231-7.
MSMB	rs10993994	10q11.2	3.5x10-6	literature	22887727	FitzGerald LM, Zhang X, Kolb S, Kwon EM, Liew YC, Hurtado-Coll A, Knudsen BS, Ostrander EA, Stanford JL. Investigation of the relationship between prostate cancer and MSMB and NCOA4 genetic variants and protein expression. Hum Mutat. 2013 Jan;34(1):149-56.
MSMB	rs10993994	10q11.2	3x10-10	literature	21160077	Gudmundsson J, Besenbacher S, Sulem P, Gudbjartsson DF, Olafsson I, et al. Genetic correction of PSA values using sequence variants associated with PSA levels. Sci Transl Med. 2010 Dec 15;2(62):62ra92.
MSMB	rs10993994	10q11.2	3.7x10-3	literature	19767754	Gudmundsson J, Sulem P, Gudbjartsson DF, Blondal T, Gylfason A, Agnarsson BA. Et al. Genome-wide association and replication studies identify four variants associated with prostate cancer susceptibility. Nat Genet. 2009 Oct;41(10):1122-6.
MSMB	rs10993994	10q11.2	0.01	literature	21637779	Haiman CA, Chen GK, Blot WJ, Strom SS, Berndt SI, Kittles RA. Et al. Characterizing genetic risk at known prostate cancer susceptibility loci in African Americans. PLoS Genet. 2011 May;7(5):e1001387.
MSMB	rs10993994	10q11.2	0.004	literature	19900942	Huang SP, Huang LC, Ting WC, Chen LM, Chang TY, Lu TL, Lan YH, Liu CC, Yang WH, Lee HZ, Hsieh CJ, Bao BY. Prognostic significance of prostate cancer susceptibility variants on prostate-specific antigen recurrence after radical prostatectomy. Cancer Epidemiol Biomarkers Prev. 2009 Nov;18(11):3068-74.
MSMB	rs10993994	10q11.2	6.70x10-5	literature	22198737	Jin G, Lu L, Cooney KA, Ray AM, Zuhlke KA, Lange EM, Cannon-Albright LA, Camp NJ, et al. 2012. Validation of prostate cancer risk-related loci identified from genome-wide association studies using family-based association analysis: evidence from the International Consortium for Prostate Cancer Genetics (ICPCG). Hum Genet. 2012 Jul;131(7):1095-103.
MSMB	rs10993994	10q11.2	6.80x10-5	literature	20564319	Kim ST, Cheng Y, Hsu FC, Jin T, Kader AK, Zheng SL, Isaacs WB, Xu J, Sun J. Prostate cancer risk-associated variants reported from genome-wide association studies: meta-analysis and their contribution to genetic Variation. Prostate. 2010 Dec 1;70(16):1729-38.
MSMB	rs10993994	10q11.2	1.0x10-17	literature	18708398	Kote-Jarai Z, Easton DF, Stanford JL, Ostrander EA, Schleutker J, Ingles SA, et al. Multiple novel prostate cancer predisposition loci confirmed by an international study: the PRACTICAL Consortium. Cancer Epidemiol Biomarkers Prev. 2008 Aug;17(8):2052-61.
MSMB	rs10993994	10q11.2	5.95x10-25	literature	21390317	Lindstrom S, Schumacher F, Siddiq A, Travis RC, Campa D, et al. Characterizing associations and SNP-environment interactions for GWAS-identified prostate cancer risk markers--results from BPC3. PLoS One. 2011 Feb 24;6(2):e17142.
MSMB	rs10993994	10q11.2	0.04	literature	21756274	Liu F, Hsing AW, Wang X, Shao Q, Qi J, Ye Y, Wang Z, Chen H, Gao X, et al. Systematic confirmation study of reported prostate cancer risk-associated single nucleotide polymorphisms in Chinese men. Cancer Sci. 2011 Oct;102(10):1916-20.
MSMB	rs10993994	10q11.2	0.001	literature	20690139	Liu H, Wang B, Han C. Meta-analysis of genome-wide and replication association studies on prostate cancer. Prostate. 2011 Feb 1;71(2):209-24.
MSMB	rs10993994	10q11.2	9.7x10-19	literature	19383797	Lou H, Yeager M, Li H, Bosquet JG, Hayes RB, Orr N, Yu K, et al. Fine mapping and functional analysis of a common variant in MSMB on chromosome 10q11.2 associated with prostate cancer susceptibility. Proc Natl Acad Sci U S A. 2009 May 12;106(19):7933-8.
MSMB	rs10993994	10q11.2	0.001	literature	22733159	Prostate Cancer Prostatic Dis. 2012 Dec;15(4):365-8. Analysis of prostate cancer association with four single-nucleotide polymorphisms from genome-wide studies and serum phyto-estrogen concentrations. Prostate Cancer Prostatic Dis. 2012 Dec;15(4):365-8.
MSMB	rs10993994	10q11.2	0.0003	literature	22677538	Rinckleb AE, Surowy HM, Luedeke M, Varga D, et al. The prostate cancer risk locus at 10q11 is associated with DNA repair capacity. DNA Repair (Amst). 2012 Aug 1;11(8):693-701.
MSMB	rs10993994	10q11.2	4.62-10-17	literature	23269536	Sun J, Tao S, Gao Y, Peng T, Tan A, Zhang H, Yang X, Qin X, Hu Y, et al. Genome-wide association study identified novel genetic variant on SLC45A3 gene associated with serum levels prostate-specific antigen (PSA) in a Chinese population. Hum Genet. 2013 Apr;132(4):423-9.
MSMB	rs10993994	10q11.2	7.31x10-13	literature	18264096	Thomas G, Jacobs KB, Yeager M, Kraft P, Wacholder S, Orr N, Yu K, Chatterjee N, et al. Multiple loci identified in a genome-wide association study of prostate cancer. Nat Genet. 2008 Mar;40(3):310-5.
MSMB	rs10993994	10q11.2	1e-50	GWAS Database	28139693	Thomas J Hoffman et al. 2016
MSMB	rs10993994	10q11.2	1.27x10-6	literature	22459122	Tsilidis KK, Travis RC, Appleby PN, Allen NE, Lindstrom S, Schumacher FR, et al. Interactions between genome-wide significant genetic variants and circulating concentrations of insulin-like growth factor 1, sex hormones, and binding proteins in relation to prostate cancer risk in the National Cancer Institute Breast and Prostate Cancer Cohort Consortium. Am J Epidemiol. 2012 May 1;175(9):926-35.
MSMB	rs10993994	10q11.2	0.02	literature	21829199	Vijai J, Kirchhoff T, Gallagher D, Hamel N, Guha S, Darvasi A, et al. Genetic architecture of prostate cancer in the Ashkenazi Jewish population. Br J Cancer. 2011 Sep 6;105(6):864-9.
MSMB	rs10993994	10q11.2	3.1x10-3	literature	19318432	Waters KM, Le Marchand L, Kolonel LN, Monroe KR, Stram DO, Henderson BE, Haiman CA. Generalizability of associations from prostate cancer genome-wide association studies in multiple populations. Cancer Epidemiol Biomarkers Prev. 2009 Apr;18(4):1285-9.
MSMB	rs10993994	10q11.2	1.0x10-3	literature	19116992	Wiklund F, Zheng SL, Sun J, Adami HO, Lilja H, Hsu FC, et al. Association of reported prostate cancer risk alleles with PSA levels among men without a diagnosis of prostate cancer. Prostate. 2009 Mar 1;69(4):419-27.
MSMB	rs10993994	10q11.2	0.002	literature	21456070	Xu Z, Bensen JT, Smith GJ, Mohler JL, Taylor JA. GWAS SNP Replication among African American and European American men in the North Carolina-Louisiana prostate cancer project (PCaP). Prostate. 2011 Jun 1;71(8):881-91.
MSMB	rs10993994	10q11.2	8.0x10-24	literature	19639606	Zhong H, Prentice RL. Correcting "winner's curse" in odds ratios from genomewide association findings for major complex human diseases. Genet Epidemiol. 2010 Jan;34(1):78-91.
MSMB	rs10993994	10q11.22	3e-08	GWASTABLE	20676098	Takata R	2010-08-01	Nat Genet
MSMB	rs10993994	10q11.22	3e-26	GWASTABLE	24753544	Knipe DW	2014-04-21	Cancer Epidemiol Biomarkers Prev
MSMB	rs10993994	10q11.22	2e-07	GWASTABLE	24740154	Lange EM	2014-04-16	PLoS One
MSMB	rs10993994	10q11.22	5e-06	GWASTABLE	21743057	Schumacher FR	2011-07-08	Hum Mol Genet
MSMB	rs10993994	10q11.22	4e-08	GWASTABLE	26443449	Wang M	2015-10-07	Nat Commun
MSMB	rs10993994	10q11.22	3e-08	GWASTABLE	20676098	Takata R	2010-09-11	Nat Genet
MSMB	rs10993994	10q11.22	9e-29	GWASTABLE	18264097	Eeles RA	2008-06-16	Nat Genet
MSMB	rs10993994	10q11.22	7e-13	GWASTABLE	18264096	Thomas G	2008-06-16	Nat Genet
MSMB	rs10993994	10q11.22	5e-06	GWASTABLE	21743057	Schumacher FR	2011-07-30	Hum Mol Genet
MSMB	rs10993994	10q11.22	3e-18	GWASTABLE	26034056	Hoffmann TJ	2016-07-15	Cancer Discov
MSMB	rs10993994	10q11.22	7e-21	GWASTABLE	26034056	Hoffmann TJ	2016-07-15	Cancer Discov
MSMB	rs10993994	10q11.22	3e-26	GWASTABLE	24753544	Knipe DW	2014-11-07	Cancer Epidemiol Biomarkers Prev
MSMB	rs10993994	10q11.22	4e-08	GWASTABLE	26443449	Wang M	2016-06-13	Nat Commun
MSMB	rs10993994	10q11.22	2e-147	GWASTABLE	29892016	Schumacher FR	2018-08-14	Nat Genet
MSMB	rs10993994	10q11.22	2e-07	GWASTABLE	24740154	Lange EM	2014-11-09	PLoS One
MSMB	rs4631830	10q11.2	7e-11	GWAS Database	25434496	Sorium Kim, Chol Shin and Sun Ha Jee et al. 2014
MSMB	rs4631830	10q11.22	7e-11	GWASTABLE	25434496	Kim S	2015-07-10	Gene
MSMB	rs7075697	10q11.2	1.46x10-9	literature	21960693	Feng J, Sun J, Kim ST, Lu Y, Wang Z, Zhang Z, Gronberg H, Isaacs WB, Zheng SL, Xu J. A genome-wide survey over the ChIP-on-chip identified androgen receptor-binding genomic regions identifies a novel prostate cancer susceptibility locus at 12q13.13. Cancer Epidemiol Biomarkers Prev. 2011 Nov;20(11):2396-403.
MSMB	rs7076948	10q11.2	0.01	literature	19383797	Lou H, Yeager M, Li H, Bosquet JG, Hayes RB, Orr N, Yu K, et al. Fine mapping and functional analysis of a common variant in MSMB on chromosome 10q11.2 associated with prostate cancer susceptibility. Proc Natl Acad Sci U S A. 2009 May 12;106(19):7933-8.
MSMB	rs7904463	10q11.2	0.02	literature	20717903	Wang Y, Ray AM, Johnson EK, Zuhlke KA, Cooney KA, Lange EM. Evidence for an association between prostate cancer and chromosome 8q24 and 10q11 genetic variants in African American men: the Flint Men's Health Study. Prostate. 2011 Feb 15;71(3):225-31.
MSMB	rs7920517	10q11.2	0.01	literature	22303333	Barnholtz-Sloan JS, Raska P, Rebbeck TR, Millikan RC. Replication of GWAS "Hits" by Race for Breast and Prostate Cancers in European Americans and African Americans. Front Genet. 2011;2:37.
MSMB	rs7920517	10q11.2	0.001	literature	21756274	Liu F, Hsing AW, Wang X, Shao Q, Qi J, Ye Y, Wang Z, Chen H, Gao X, et al. Systematic confirmation study of reported prostate cancer risk-associated single nucleotide polymorphisms in Chinese men. Cancer Sci. 2011 Oct;102(10):1916-20.
MSMB	rs7920517	10q11.2	0.001	literature	20690139	Liu H, Wang B, Han C. Meta-analysis of genome-wide and replication association studies on prostate cancer. Prostate. 2011 Feb 1;71(2):209-24.
MSMB	rs7920517	10q11.2	0.02	literature	21829199	Vijai J, Kirchhoff T, Gallagher D, Hamel N, Guha S, Darvasi A, et al. Genetic architecture of prostate cancer in the Ashkenazi Jewish population. Br J Cancer. 2011 Sep 6;105(6):864-9.
MSMB	rs792057	10q11.2	7.2x10-13	literature	19639606	Zhong H, Prentice RL. Correcting "winner's curse" in odds ratios from genomewide association findings for major complex human diseases. Genet Epidemiol. 2010 Jan;34(1):78-91.
MSR1	rs12114368	8p22	0.3	literature	20086112	Beuten J, Gelfond JA, Franke JL, Shook S, Johnson-Pais TL, Thompson IM, Leach RJ. Single and multivariate associations of MSR1, ELAC2, and RNASEL with prostate cancer in an ethnic diverse cohort of men. Cancer Epidemiol Biomarkers Prev. 2010 Feb;19(2):588-99.
MSR1	rs12718376	8p22	0.004	literature	20086112	Beuten J, Gelfond JA, Franke JL, Shook S, Johnson-Pais TL, Thompson IM, Leach RJ. Single and multivariate associations of MSR1, ELAC2, and RNASEL with prostate cancer in an ethnic diverse cohort of men. Cancer Epidemiol Biomarkers Prev. 2010 Feb;19(2):588-99.
MSR1	rs17484273	8p22	0.02	literature	20086112	Beuten J, Gelfond JA, Franke JL, Shook S, Johnson-Pais TL, Thompson IM, Leach RJ. Single and multivariate associations of MSR1, ELAC2, and RNASEL with prostate cancer in an ethnic diverse cohort of men. Cancer Epidemiol Biomarkers Prev. 2010 Feb;19(2):588-99.
MSR1	rs351572	8p22	0.009	literature	20086112	Beuten J, Gelfond JA, Franke JL, Shook S, Johnson-Pais TL, Thompson IM, Leach RJ. Single and multivariate associations of MSR1, ELAC2, and RNASEL with prostate cancer in an ethnic diverse cohort of men. Cancer Epidemiol Biomarkers Prev. 2010 Feb;19(2):588-99.
MSR1	rs4333601	8p22	0.02	literature	20086112	Beuten J, Gelfond JA, Franke JL, Shook S, Johnson-Pais TL, Thompson IM, Leach RJ. Single and multivariate associations of MSR1, ELAC2, and RNASEL with prostate cancer in an ethnic diverse cohort of men. Cancer Epidemiol Biomarkers Prev. 2010 Feb;19(2):588-99.
MSRI	rs2410373	8p22	0.02	literature	17903305	Murabito JM, Rosenberg CL, Finger D, Kreger BE, Levy D, Splansky GL, Antman K, Hwang SJ. A genome-wide association study of breast and prostate cancer in the NHLBI's Framingham Heart Study. BMC Med Genet. 2007 Sep 19;8 Suppl 1:S6.
MSRI	rs9325782	8p22	0.008	literature	17903305	Murabito JM, Rosenberg CL, Finger D, Kreger BE, Levy D, Splansky GL, Antman K, Hwang SJ. A genome-wide association study of breast and prostate cancer in the NHLBI's Framingham Heart Study. BMC Med Genet. 2007 Sep 19;8 Suppl 1:S6.
MTNR1B	rs10830963	11q21-q22	0.03	literature	23193118	Machiela MJ, Lindstr≈m S, Allen NE, Haiman CA, Albanes D, Barricarte A, et al. Association of type 2 diabetes susceptibility variants with advanced prostate cancer risk in the Breast and Prostate Cancer Cohort Consortium. Am J Epidemiol. 2012 Dec 15;176(12):1121-9.
MYC	rs10090154	8q24	0.04	literature	22549899	Bensen JT, Xu Z, Smith GJ, Mohler JL, Fontham ET, Taylor JA. Genetic polymorphism and prostate cancer aggressiveness: a case-only study of 1,536 GWAS and candidate SNPs in African-Americans and European-Americans. Prostate. 2013 Jan;73(1):11-22.
MYC	rs10505477	8q24.21	7e-21	GWASTABLE	28139693	Hoffmann TJ	2017-01-31	Nat Commun
MYC	rs10505477	8q24.21	9e-09	GWASTABLE	24740154	Lange EM	2014-04-16	PLoS One
MYC	rs10505477	8q24.21	7e-21	GWASTABLE	28139693	Hoffmann TJ	2017-05-25	Nat Commun
MYC	rs12547643	8q24	5.62x10-3	literature	20978189	Koutros S, Beane Freeman LE, Berndt SI, Andreotti G, Lubin JH, Sandler DP. Et al. Pesticide use modifies the association between genetic variants on chromosome 8q24 and prostate cancer. Cancer Res. 2010 Nov 15;70(22):9224-33.
MYC	rs1447295	8q24.21	6e-18	GWASTABLE	24753544	Knipe DW	2014-04-21	Cancer Epidemiol Biomarkers Prev
MYC	rs17186926	8q24	6.0x10-3	literature	19562729	Pal P, Xi H, Guha S, Sun G, Helfand BT, Meeks JJ, Suarez BK, Catalona WJ, Deka R. Common variants in 8q24 are associated with risk for prostate cancer and tumor aggressiveness in men of European ancestry. Prostate. 2009 Oct 1;69(14):1548-56.
MYC	rs17464492	8q24	2e-10	GWAS Database	28139693	Thomas J Hoffman et al. 2016
MYC	rs3891248	8q24	0.04	literature	18483343	Salinas CA, Kwon E, Carlson CS, Koopmeiners JS, et al. Multiple independent genetic variants in the 8q24 region are associated with prostate cancer risk. Cancer Epidemiol Biomarkers Prev. 2008 May;17(5):1203-13.
MYC	rs6999921	8q24	0.005	literature	22549899	Bensen JT, Xu Z, Smith GJ, Mohler JL, Fontham ET, Taylor JA. Genetic polymorphism and prostate cancer aggressiveness: a case-only study of 1,536 GWAS and candidate SNPs in African-Americans and European-Americans. Prostate. 2013 Jan;73(1):11-22.
MYEOV	rs10896449	11q13.2	8.30x10-10	literature	21372204	Ciampa J, Yeager M, Amundadottir L, Jacobs K, Kraft P, Chung C, et al. Large-scale exploration of gene-gene interactions in prostate cancer using a multistage genome-wide association study. Cancer Res. 2011 May 1;71(9):3287-95.
MYEOV	rs11228583	11q13.3	2e-07	GWASTABLE	24740154	Lange EM	2014-04-16	PLoS One
MYEOV	rs11228583	11q13.3	2e-07	GWASTABLE	24740154	Lange EM	2014-11-09	PLoS One
MYEOV	rs12270641	11q13.3	1e-11	GWASTABLE	27262462	Teerlink CC	2016-06-04	Hum Genet
MYEOV	rs12270641	11q13.3	1e-11	GWASTABLE	27262462	Teerlink CC	2017-02-03	Hum Genet
MYEOV	rs7929962	11q13.3	2e-13	GWASTABLE	25939597	Berndt SI	2016-02-12	Nat Commun
MYO6	rs9443189	6q14.1	4e-08	GWASTABLE	25217961	Al Olama AA	2014-09-14	Nat Genet
MYO6	rs9443189	6q14.1	4e-08	GWASTABLE	25217961	Al Olama AA	2015-05-07	Nat Genet
MYO9B	rs11666569	19p13.11	8e-09	GWASTABLE	29892016	Schumacher FR	2018-08-14	Nat Genet
MYO9B	rs11666569	19p13.11	3e-06	GWASTABLE	29892016	Schumacher FR	2018-08-14	Nat Genet
NAA16	rs74922337	13q14.11	2e-07	GWASTABLE	28139693	Hoffmann TJ	2017-05-25	Nat Commun
NAALADL2	rs78943174	3q26.31	4e-08	GWASTABLE	25939597	Berndt SI	2015-05-05	Nat Commun
NAALADL2	rs78943174	3q26.31	4e-08	GWASTABLE	25939597	Berndt SI	2016-02-13	Nat Commun
NCOA4	rs10740051	10q11.2	0.009	literature	20717903	Wang Y, Ray AM, Johnson EK, Zuhlke KA, Cooney KA, Lange EM. Evidence for an association between prostate cancer and chromosome 8q24 and 10q11 genetic variants in African American men: the Flint Men's Health Study. Prostate. 2011 Feb 15;71(3):225-31.
NCOA4	rs10761581	10q11.2	2.0x10-3	literature	19153072	Chang BL, Cramer SD, Wiklund F, Isaacs SD, Stevens VL, et al. Fine mapping association study and functional analysis implicate a SNP in MSMB at 10q11 as a causal variant for prostate cancer risk. Hum Mol Genet. 2009 Apr 1;18(7):1368-75.
NCOA4	rs10994675	10q11.2	0.01	literature	19383797	Lou H, Yeager M, Li H, Bosquet JG, Hayes RB, Orr N, Yu K, et al. Fine mapping and functional analysis of a common variant in MSMB on chromosome 10q11.2 associated with prostate cancer susceptibility. Proc Natl Acad Sci U S A. 2009 May 12;106(19):7933-8.
NCOA4	rs17178655	10q11.2	0.03	literature	22542949	Kwon EM, Holt SK, Fu R, Kolb S, Williams G, Stanford JL, Ostrander EA. Androgen metabolism and JAK/STAT pathway genes and prostate cancer risk. Cancer Epidemiol. 2012 Aug;36(4):347-53.
NCOA4	rs7350420	10q11.2	5.6x10-3	literature	22887727	FitzGerald LM, Zhang X, Kolb S, Kwon EM, Liew YC, Hurtado-Coll A, Knudsen BS, Ostrander EA, Stanford JL. Investigation of the relationship between prostate cancer and MSMB and NCOA4 genetic variants and protein expression. Hum Mutat. 2013 Jan;34(1):149-56.
NCOA4	rs7350420	10q11.2	0.007	literature	22542949	Kwon EM, Holt SK, Fu R, Kolb S, Williams G, Stanford JL, Ostrander EA. Androgen metabolism and JAK/STAT pathway genes and prostate cancer risk. Cancer Epidemiol. 2012 Aug;36(4):347-53.
NCRNA00284	rs9567349	13q14.11 x 2p21	4e-06	GWASTABLE	22219177	Tao S	2012-01-04	Carcinogenesis
NEDD9	rs4713266	6p24.2	3e-09	GWASTABLE	25217961	Al Olama AA	2014-09-14	Nat Genet
NEDD9	rs4713266	6p24.2	3e-09	GWASTABLE	25217961	Al Olama AA	2015-05-07	Nat Genet
NEDD9	rs4713266	6p24.2	4e-08	GWASTABLE	25217961	Al Olama AA	2015-05-07	Nat Genet
NEDD9	rs4713266	6p24.2	1e-10	GWASTABLE	29892016	Schumacher FR	2018-08-14	Nat Genet
NGFR	rs11650494	17q21.32	2e-09	GWASTABLE	23535732	Eeles RA	2013-04-01	Nat Genet
NGFR	rs11650494	17q21.32	2e-09	GWASTABLE	23535732	Eeles RA	2013-09-16	Nat Genet
NKX3.1	rs1512268	8p21.2	3e-30	GWASTABLE	19767753	Eeles RA	2009-12-29	Nat Genet
NKX3-1	rs13272392	8p21.2	4e-34	GWASTABLE	28139693	Hoffmann TJ	2017-01-31	Nat Commun
NKX3-1	rs13272392	8p21.2	4e-34	GWASTABLE	28139693	Hoffmann TJ	2017-05-25	Nat Commun
NKX3-1	rs1512268	8p21.2	9.39x10-4	literature	21756274	Liu F, Hsing AW, Wang X, Shao Q, Qi J, Ye Y, Wang Z, Chen H, Gao X, et al. Systematic confirmation study of reported prostate cancer risk-associated single nucleotide polymorphisms in Chinese men. Cancer Sci. 2011 Oct;102(10):1916-20.
NKX3-1	rs1512268	8p21.2	0.007	literature	22459122	Tsilidis KK, Travis RC, Appleby PN, Allen NE, Lindstrom S, Schumacher FR, et al. Interactions between genome-wide significant genetic variants and circulating concentrations of insulin-like growth factor 1, sex hormones, and binding proteins in relation to prostate cancer risk in the National Cancer Institute Breast and Prostate Cancer Cohort Consortium. Am J Epidemiol. 2012 May 1;175(9):926-35.
NKX3-1	rs1512268	8p21.2	3e-30	GWASTABLE	19767753	Eeles RA	2009-09-20	Nat Genet
NKX3-1	rs1512268	8p21.2	4e-11	GWASTABLE	20676098	Takata R	2010-08-01	Nat Genet
NKX3-1	rs1512268	8p21.2	2.92x10-1	literature	19767753	Eeles RA, Kote-Jarai Z, Al Olama AA, Giles GG, Guy M, Severi G, Muir K. et al. Identification of seven new prostate cancer susceptibility loci through a genome-wide association study. Nat Genet. 2009 Oct;41(10):1116-21.
NKX3-1	rs1512268	8p21.2	5.52x10-7	literature	21390317	Lindstrom S, Schumacher F, Siddiq A, Travis RC, Campa D, et al. Characterizing associations and SNP-environment interactions for GWAS-identified prostate cancer risk markers--results from BPC3. PLoS One. 2011 Feb 24;6(2):e17142.
NKX3-1	rs1512268	8p21.2	1e-13	GWASTABLE	26443449	Wang M	2015-10-07	Nat Commun
NKX3-1	rs1512268	8p21.2	1e-13	GWASTABLE	26443449	Wang M	2016-06-13	Nat Commun
NKX3-1	rs2523395 x rs1512268	6p22.1 x 8p21.2	2e-06	GWASTABLE	22219177	Tao S	2012-03-31	Carcinogenesis
NKX3-1	rs4872175	8p21.2	0.02	literature	22542949	Kwon EM, Holt SK, Fu R, Kolb S, Williams G, Stanford JL, Ostrander EA. Androgen metabolism and JAK/STAT pathway genes and prostate cancer risk. Cancer Epidemiol. 2012 Aug;36(4):347-53.
NLGN3	rs4844289	Xq13.1	1e-09	GWASTABLE	25217961	Al Olama AA	2014-09-14	Nat Genet
NLGN3	rs4844289	Xq13.1	9e-08	GWASTABLE	25217961	Al Olama AA	2015-05-07	Nat Genet
NLGN3	rs4844289	Xq13.1	1e-09	GWASTABLE	25217961	Al Olama AA	2015-05-07	Nat Genet
NOL10	rs9287719	2p25.1	3e-08	GWASTABLE	25217961	Al Olama AA	2014-09-14	Nat Genet
NOL10	rs9287719	2p25.1	3e-08	GWASTABLE	25217961	Al Olama AA	2015-05-07	Nat Genet
NOL10	rs9287719	2p25.1	2e-08	GWASTABLE	25217961	Al Olama AA	2015-05-07	Nat Genet
NOL10	rs9287719	2p25.1	6e-17	GWASTABLE	29892016	Schumacher FR	2018-08-14	Nat Genet
NOTCH2	rs10923931	1p13-p11	0.008	literature	23193118	Machiela MJ, Lindstr≈m S, Allen NE, Haiman CA, Albanes D, Barricarte A, et al. Association of type 2 diabetes susceptibility variants with advanced prostate cancer risk in the Breast and Prostate Cancer Cohort Consortium. Am J Epidemiol. 2012 Dec 15;176(12):1121-9.
NOTCH4	rs3096702	6p21.3	4.78x10-9	literature	23535732	Eeles RA, Olama AA, Benlloch S, Saunders EJ, Leongamornlert DA, Tymrakiewicz M, et al. Identification of 23 new prostate cancer susceptibility loci using the iCOGS custom genotyping array. Nat Genet. 2013 Apr;45(4):385-91.
NOTCH4	rs3096702	6p21.32	5e-09	GWASTABLE	23535732	Eeles RA	2013-09-16	Nat Genet
NOTCH4	rs3096702	6p21.32	1e-11	GWASTABLE	29892016	Schumacher FR	2018-08-14	Nat Genet
NR2F2	rs11637980 x rs1447295	15q26.2 x 8q24.21	2e-06	GWASTABLE	22219177	Tao S	2012-03-31	Carcinogenesis
NR2F2 x NR	rs11637980 x rs1447295	15q26.2 x 8q24.21	2e-06	GWASTABLE	22219177	Tao S	2012-01-04	Carcinogenesis
NSMCE2	rs7008482	NSMCE2	0.04	literature	20460480	Gallagher DJ, Vijai J, Cronin AM, Bhatia J, Vickers AJ. Et al. Susceptibility loci associated with prostate cancer progression and mortality. Clin Cancer Res. 2010 May 15;16(10):2819-32.
NSMCE2	rs7008482	NSMCE2	5.0x10-4	literature	17978284	Robbins C, Torres JB, Hooker S, Bonilla C, Hernandez W, Candreva A, Ahaghotu C, Kittles R, Carpten J. Confirmation study of prostate cancer risk variants at 8q24 in African Americans identifies a novel risk locus. Genome Res. 2007 Dec;17(12):1717-22.
NSMCE2	rs7008482	NSMCE2	0.003	literature	21829199	Vijai J, Kirchhoff T, Gallagher D, Hamel N, Guha S, Darvasi A, et al. Genetic architecture of prostate cancer in the Ashkenazi Jewish population. Br J Cancer. 2011 Sep 6;105(6):864-9.
NSMCE2	rs7008482	NSMCE2	0.03	literature	19549807	Xu J, Kibel AS, Hu JJ, Turner AR, Pruett K, Zheng SL. Et al. Prostate cancer risk associated loci in African Americans. Cancer Epidemiol Biomarkers Prev. 2009 Jul;18(7):2145-9.
NUCKS1	rs823123	1q32.1	5e-13	GWAS Database	25434496	Sorium Kim, Chol Shin and Sun Ha Jee et al. 2014
NUCKS1	rs823123	1q32.1	5e-13	GWASTABLE	25434496	Kim S	2015-07-10	Gene
NUDT10	RS5945572	Xp11.22-p11.1		literature	21756274	Liu F, Hsing AW, Wang X, Shao Q, Qi J, Ye Y, Wang Z, Chen H, Gao X, et al. Systematic confirmation study of reported prostate cancer risk-associated single nucleotide polymorphisms in Chinese men. Cancer Sci. 2011 Oct;102(10):1916-20.
NUDT10	rs5945572	Xp11.22-p11.1	0.001	literature	20690139	Liu H, Wang B, Han C. Meta-analysis of genome-wide and replication association studies on prostate cancer. Prostate. 2011 Feb 1;71(2):209-24.
NUDT10	rs5945572	Xp11.22-p11.1	0.02	literature	21071540	Chang BL, Spangler E, Gallagher S, Haiman CA, Henderson B, Isaacs W. et al. Validation of genome-wide prostate cancer associations in men of African descent. Cancer Epidemiol Biomarkers Prev. 2011 Jan;20(1):23-32.
NUDT10	rs5945572	Xp11.22-p11.1	0.05	literature	18264098	Gudmundsson J, Sulem P, Rafnar T, Bergthorsson JT, Manolescu A, et al. Common sequence variants on 2p15 and Xp11.22 confer susceptibility to prostate cancer. Nat Genet. 2008 Mar;40(3):281-3.
NUDT10	rs5945572	Xp11.22-p11.1	0.0049	literature	21829199	Vijai J, Kirchhoff T, Gallagher D, Hamel N, Guha S, Darvasi A, et al. Genetic architecture of prostate cancer in the Ashkenazi Jewish population. Br J Cancer. 2011 Sep 6;105(6):864-9.
NUDT10	rs5945572	Xp11.22-p11.1	2.6x10-4	literature	19318432	Waters KM, Le Marchand L, Kolonel LN, Monroe KR, Stram DO, Henderson BE, Haiman CA. Generalizability of associations from prostate cancer genome-wide association studies in multiple populations. Cancer Epidemiol Biomarkers Prev. 2009 Apr;18(4):1285-9.
NUDT10	rs5945572	Xp11.22	4e-13	GWASTABLE	18264098	Gudmundsson J	2008-06-16	Nat Genet
nudt10	rs5945619	Xp11.22-p11.1	1.89x10-4	literature	18264097	Eeles RA, Kote-Jarai Z, Giles GG, Olama AA, Guy M, Jugurnauth SK, Mulholland S, Leongamornlert DA, et al. Multiple newly identified loci associated with prostate cancer susceptibility. Nat Genet. 2008 Mar;40(3):316-21.
NUDT10	rs5945619	Xp11.22-p11.1	0.04	literature	21071540	Chang BL, Spangler E, Gallagher S, Haiman CA, Henderson B, Isaacs W. et al. Validation of genome-wide prostate cancer associations in men of African descent. Cancer Epidemiol Biomarkers Prev. 2011 Jan;20(1):23-32.
NUDT10	rs5945619	Xp11.22-p11.1	6.92x10-4	literature	22198737	Jin G, Lu L, Cooney KA, Ray AM, Zuhlke KA, Lange EM, Cannon-Albright LA, Camp NJ, et al. 2012. Validation of prostate cancer risk-related loci identified from genome-wide association studies using family-based association analysis: evidence from the International Consortium for Prostate Cancer Genetics (ICPCG). Hum Genet. 2012 Jul;131(7):1095-103.
NUDT10	rs5945619	Xp11.22-p11.1	2.2x10-8	literature	19639606	Zhong H, Prentice RL. Correcting "winner's curse" in odds ratios from genomewide association findings for major complex human diseases. Genet Epidemiol. 2010 Jan;34(1):78-91.
NUDT10	rs5945619	Xp11.22	2e-09	GWASTABLE	18264097	Eeles RA	2008-06-16	Nat Genet
NUDT10	rs59456619	Xp11.22-p11.1	6.92x10-4	literature	22198737	Jin G, Lu L, Cooney KA, Ray AM, Zuhlke KA, Lange EM, et al. Validation of prostate cancer risk-related loci identified from genome-wide association studies using family-based association analysis: evidence from the International Consortium for Prostate Cancer Genetics (ICPCG). Hum Genet. 2012 Jul;131(7):1095-103.
NUDT11	rs5945572	Xp11.22-p11.1	0.05	literature	19902474	Hooker S, Hernandez W, Chen H, Robbins C, Torres JB, Ahaghotu C, Carpten J, Kittles RA. Replication of prostate cancer risk loci on 8q24, 11q13, 17q12, 19q33, and Xp11 in African Americans. Prostate. 2010 Feb 15;70(3):270-5.
NUDT11	rs5945572	Xp11.22-p11.1	6.17x10-11	literature	21390317	Lindstrom S, Schumacher F, Siddiq A, Travis RC, Campa D, et al. Characterizing associations and SNP-environment interactions for GWAS-identified prostate cancer risk markers--results from BPC3. PLoS One. 2011 Feb 24;6(2):e17142.
NUDT11	rs5945572	Xp11.22-p11.1	3.96x10-4	literature	22459122	Tsilidis KK, Travis RC, Appleby PN, Allen NE, Lindstrom S, Schumacher FR, et al. Interactions between genome-wide significant genetic variants and circulating concentrations of insulin-like growth factor 1, sex hormones, and binding proteins in relation to prostate cancer risk in the National Cancer Institute Breast and Prostate Cancer Cohort Consortium. Am J Epidemiol. 2012 May 1;175(9):926-35.
NUDT11	rs5945619	Xp11.22-p11.1	1.89x10-4, 1.5x10-9	literature	18264097	Eeles RA, Kote-Jarai Z, Giles GG, Olama AA, Guy M, Jugurnauth SK, Mulholland S, Leongamornlert DA, et al. Multiple newly identified loci associated with prostate cancer susceptibility. Nat Genet. 2008 Mar;40(3):316-21.
NUDT11	rs5945619	Xp11.22-p11.1	1.00x10-47	literature	22730461	Grisanzio C, Werner L, Takeda D, Awoyemi BC, Pomerantz MM. et al. Genetic and functional analyses implicate the NUDT11, HNF1B, and SLC22A3 genes in prostate cancer pathogenesis. Proc Natl Acad Sci U S A. 2012 Jul 10;109(28):11252-7.
NUDT11	rs5945619	Xp11.22-p11.1	8.27x10-13	literature	21390317	Lindstrom S, Schumacher F, Siddiq A, Travis RC, Campa D, et al. Characterizing associations and SNP-environment interactions for GWAS-identified prostate cancer risk markers--results from BPC3. PLoS One. 2011 Feb 24;6(2):e17142.
NUDT11	rs5945619	Xp11.22-p11.1	0.001	literature	20690139	Liu H, Wang B, Han C. Meta-analysis of genome-wide and replication association studies on prostate cancer. Prostate. 2011 Feb 1;71(2):209-24.
NUDT11	rs5945619	Xp11.22-p11.1	2.95x10-4	literature	22459122	Tsilidis KK, Travis RC, Appleby PN, Allen NE, Lindstrom S, Schumacher FR, et al. Interactions between genome-wide significant genetic variants and circulating concentrations of insulin-like growth factor 1, sex hormones, and binding proteins in relation to prostate cancer risk in the National Cancer Institute Breast and Prostate Cancer Cohort Consortium. Am J Epidemiol. 2012 May 1;175(9):926-35.
NUDT11	rs5945619	Xp11.22	1e-73	GWASTABLE	29892016	Schumacher FR	2018-08-14	Nat Genet
OACYLP	rs12956892	18q21.32	8e-09	GWASTABLE	29892016	Schumacher FR	2018-08-14	Nat Genet
OTUD7A	rs16956801	15q13.1	7.65x10-5	literature	21960693	Feng J, Sun J, Kim ST, Lu Y, Wang Z, Zhang Z, Gronberg H, Isaacs WB, Zheng SL, Xu J. A genome-wide survey over the ChIP-on-chip identified androgen receptor-binding genomic regions identifies a novel prostate cancer susceptibility locus at 12q13.13. Cancer Epidemiol Biomarkers Prev. 2011 Nov;20(11):2396-403.
OTX1	rs58235267	2p15	6e-07	GWASTABLE	28139693	Hoffmann TJ	2017-05-25	Nat Commun
PARG	rs10993994	10q11.22	1e-15	GWASTABLE	25939597	Berndt SI	2015-05-05	Nat Commun
PARG	rs10993994	10q11.22	1e-15	GWASTABLE	25939597	Berndt SI	2016-02-12	Nat Commun
PARK7	rs6703670	1p36.23	9.09x10-4	literature	21960693	Feng J, Sun J, Kim ST, Lu Y, Wang Z, Zhang Z, Gronberg H, Isaacs WB, Zheng SL, Xu J. A genome-wide survey over the ChIP-on-chip identified androgen receptor-binding genomic regions identifies a novel prostate cancer susceptibility locus at 12q13.13. Cancer Epidemiol Biomarkers Prev. 2011 Nov;20(11):2396-403.
PAX9	rs11629412	14q13.3	2e-12	GWASTABLE	29892016	Schumacher FR	2018-08-14	Nat Genet
PCAT19	rs11672691	19q13.2	2e-23	GWASTABLE	29892016	Schumacher FR	2018-08-14	Nat Genet
PCAT2	rs1016343	8q24.21	1e-07	GWASTABLE	18264097	Eeles RA	2008-06-16	Nat Genet
PCAT2	rs1016343	8q24.21	4e-10	GWASTABLE	21743057	Schumacher FR	2011-07-30	Hum Mol Genet
PCAT2	rs1016343	8q24.21	5e-21	GWASTABLE	26034056	Hoffmann TJ	2016-07-15	Cancer Discov
PCAT2	rs1031588; rs1456305; rs6994316; rs1456314; rs7825414; rs17831626; rs7816535; rs1016343; rs1551510; rs6470494; rs1378897; rs6993569; rs1016342; rs1456306	8q24.21	3e-15	GWASTABLE	17401366	Gudmundsson J	2008-06-16	Nat Genet
PCAT2	rs72725854	8q24.21	2e-11	GWASTABLE	29356057	Du Z	2018-07-03	Prostate
PCAT2	rs77541621	8q24.21	2e-26	GWASTABLE	26034056	Hoffmann TJ	2016-07-15	Cancer Discov
PCDH15	rs11003686	10q21.1	9e-06	GWASTABLE	29356057	Du Z	2018-07-03	Prostate
PDGFC	rs10023685	4q32.1	2e-09	GWASTABLE	28139693	Hoffmann TJ	2017-01-31	Nat Commun
PDGFC	rs10023685	4q32.1	2e-09	GWASTABLE	28139693	Hoffmann TJ	2017-05-25	Nat Commun
PDLIM5	rs12500426	4q22	1.3x10-11	literature	19767753	Eeles RA, Kote-Jarai Z, Al Olama AA, Giles GG, Guy M, Severi G, Muir K, Identification of seven new prostate cancer susceptibility loci through a genome-wide association study. Nat Genet. 2009 Oct;41(10):1116-21.
PDLIM5	rs12500426	4q22.3	1e-11	GWASTABLE	19767753	Eeles RA	2009-12-29	Nat Genet
PDLIM5	rs17021918	4q22	4.2x10-15	literature	19767753	Eeles RA, Kote-Jarai Z, Al Olama AA, Giles GG, Guy M, Severi G, Muir K, Identification of seven new prostate cancer susceptibility loci through a genome-wide association study. Nat Genet. 2009 Oct;41(10):1116-21.
PDLIM5	rs17021918	4q22	1.54x10-15	literature	20564319	Kim ST, Cheng Y, Hsu FC, Jin T, Kader AK, Zheng SL, Isaacs WB, Xu J, Sun J. Prostate cancer risk-associated variants reported from genome-wide association studies: meta-analysis and their contribution to genetic Variation. Prostate. 2010 Dec 1;70(16):1729-38.
PDLIM5	rs17021918	4q22	5.67x10-4	literature	22459122	Tsilidis KK, Travis RC, Appleby PN, Allen NE, Lindstrom S, Schumacher FR, et al. Interactions between genome-wide significant genetic variants and circulating concentrations of insulin-like growth factor 1, sex hormones, and binding proteins in relation to prostate cancer risk in the National Cancer Institute Breast and Prostate Cancer Cohort Consortium. Am J Epidemiol. 2012 May 1;175(9):926-35.
PDLIM5	rs17021918	4q22.3	4e-15	GWASTABLE	19767753	Eeles RA	2009-12-29	Nat Genet
PDLIM5	rs17021918	4q22.3	1e-24	GWASTABLE	29892016	Schumacher FR	2018-08-14	Nat Genet
PDLIMS	rs12500426	4q22	0.002	literature	21390317	Lindstrom S, Schumacher F, Siddiq A, Travis RC, Campa D, et al. Characterizing associations and SNP-environment interactions for GWAS-identified prostate cancer risk markers--results from BPC3. PLoS One. 2011 Feb 24;6(2):e17142.
PDLIMS	rs17021918	4q22	5.35x10-5	literature	21390317	Lindstrom S, Schumacher F, Siddiq A, Travis RC, Campa D, et al. Characterizing associations and SNP-environment interactions for GWAS-identified prostate cancer risk markers--results from BPC3. PLoS One. 2011 Feb 24;6(2):e17142.
PEX14	rs636291	1p36.22	2e-08	GWASTABLE	25217961	Al Olama AA	2014-09-14	Nat Genet
PEX14	rs636291	1p36.22	2e-08	GWASTABLE	25217961	Al Olama AA	2015-05-07	Nat Genet
PEX14	rs636291	1p36.22	6e-07	GWASTABLE	29892016	Schumacher FR	2018-08-14	Nat Genet
PHF19	rs59482735	9q33.2	4e-09	GWASTABLE	28139693	Hoffmann TJ	2017-01-31	Nat Commun
PHF19	rs59482735	9q33.2	4e-09	GWASTABLE	28139693	Hoffmann TJ	2017-05-25	Nat Commun
PHF20L1	rs2472537	8q24.22	2.12x10-4	literature	21960693	Feng J, Sun J, Kim ST, Lu Y, Wang Z, Zhang Z, Gronberg H, Isaacs WB, Zheng SL, Xu J. A genome-wide survey over the ChIP-on-chip identified androgen receptor-binding genomic regions identifies a novel prostate cancer susceptibility locus at 12q13.13. Cancer Epidemiol Biomarkers Prev. 2011 Nov;20(11):2396-403.
PHLPP2	rs12051443	16q22.2	3e-08	GWASTABLE	25217961	Al Olama AA	2014-09-14	Nat Genet
PHLPP2	rs12051443	16q22.2	3e-08	GWASTABLE	25217961	Al Olama AA	2015-05-07	Nat Genet
PIK3R1	rs13156223	5q13.1	0.04	literature	21373201	Campa D, H?sing A, Stein A, Dostal L, Boeing H, Pischon T, et al. Genetic variability of the mTOR pathway and prostate cancer risk in the European Prospective Investigation on Cancer (EPIC). PLoS One. 2011 Feb 23;6(2):e16914.
PIK3R1	rs706711	5q13.1	0.01	literature	21373201	Campa D, H?sing A, Stein A, Dostal L, Boeing H, Pischon T, et al. Genetic variability of the mTOR pathway and prostate cancer risk in the European Prospective Investigation on Cancer (EPIC). PLoS One. 2011 Feb 23;6(2):e16914.
PKD1L3	rs12597458	16q22.2	1e-07	GWASTABLE	25939597	Berndt SI	2015-05-05	Nat Commun
PKD1L3	rs12597458	16q22.2	1e-07	GWASTABLE	25939597	Berndt SI	2016-02-12	Nat Commun
PKHD1	rs10498792	6p21.2-p12	3e-06	nggri	19767753	Eeles RA, Kote-Jarai Z, Al Olama AA, Identification of seven new prostate cancer susceptibility loci through a genome-wide association study. 2009 Oct;41(10):1116-21
PKHD1	rs10498792	6p12.2	3e-06	GWASTABLE	17903305	Murabito JM	2007-09-19	BMC Med Genet
PKHD1	rs10498792	6p12.2	3e-06	GWASTABLE	17903305	Murabito JM	2008-09-17	BMC Med Genet
PKIA	rs2219968 x rs1571801	8q21.13 x 9q33.2	6e-07	GWASTABLE	22219177	Tao S	2012-03-31	Carcinogenesis
PKIA	rs2219968 x rs1571801	8q21.13 x 9q33.2	6e-07	GWASTABLE	22219177	Tao S	2012-01-04	Carcinogenesis
PKNOX2	rs138466039	11q24.2	2e-11	GWASTABLE	29892016	Schumacher FR	2018-08-14	Nat Genet
PLCL1	rs13398206 x rs10896449	2q33.1 x 11q13.3	4e-06	GWASTABLE	22219177	Tao S	2012-03-31	Carcinogenesis
PLCL1	rs13398206 x rs10896449	2q33.1 x 11q13.3	4e-06	GWASTABLE	22219177	Tao S	2012-01-04	Carcinogenesis
PLEKHM3	rs6712527	2q33.3	3.76x10-4	literature	21960693	Feng J, Sun J, Kim ST, Lu Y, Wang Z, Zhang Z, Gronberg H, Isaacs WB, Zheng SL, Xu J. A genome-wide survey over the ChIP-on-chip identified androgen receptor-binding genomic regions identifies a novel prostate cancer susceptibility locus at 12q13.13. Cancer Epidemiol Biomarkers Prev. 2011 Nov;20(11):2396-403.
POLR2E	rs3787016	19p13.3	7.22x10-7	literature	21856995	Jin G, Sun J, Isaacs SD, Wiley KE, Kim ST, Chu LW, Zhang Z, Zhao H, Zheng SL, Isaacs WB, Xu J. Human polymorphisms at long non-coding RNAs (lncRNAs) and association with prostate cancer risk. Carcinogenesis. 2011 Nov;32(11):1655-9.
POU2F2	rs61088131	19q13.2	9e-09	GWASTABLE	29892016	Schumacher FR	2018-08-14	Nat Genet
POU2F2	rs61088131	19q13.2	4e-06	GWASTABLE	29892016	Schumacher FR	2018-08-14	Nat Genet
POU5F1B	rs1447295	8q24.21	4e-23	GWASTABLE	26443449	Wang M	2016-06-13	Nat Commun
POU5F1B	rs16901979	8q24.21	1e-16	GWASTABLE	26443449	Wang M	2015-10-07	Nat Commun
POU5F1B	rs16901979	8q24.21	1e-16	GWASTABLE	26443449	Wang M	2016-06-13	Nat Commun
POU5F1B	rs6983267	8q24.21	7.50x10-6	literature	18264096	Thomas G, Jacobs KB, Yeager M, Kraft P, Wacholder S, Orr N, Yu K, Chatterjee N, et al. Multiple loci identified in a genome-wide association study of prostate cancer. Nat Genet. 2008 Mar;40(3):310-5.
POU5F1P1	rs6998061	8q24.21	0.001	literature	19567509	Breyer JP, McReynolds KM, Yaspan BL, Bradley KM, Dupont WD, Smith JR. Genetic variants and prostate cancer risk: candidate replication and exploration of viral restriction genes. Cancer Epidemiol Biomarkers Prev. 2009 Jul;18(7):2137-44.
PPF1BP2	rs12791447	11p15.4	4e-08	GWAS Database	26443449	Meilin Wang et al. 2015
PPFIA2	rs10778826	12q21.31	0.006	literature	19767753	Eeles RA, Kote-Jarai Z, Al Olama AA, Giles GG, Guy M, Severi G, Muir K, Identification of seven new prostate cancer susceptibility loci through a genome-wide association study. Nat Genet. 2009 Oct;41(10):1116-21.
PPFIBP2	rs12791447	11p15.4	4e-08	GWASTABLE	26443449	Wang M	2015-10-07	Nat Commun
PPFIBP2	rs12791447	11p15.4	4e-08	GWASTABLE	26443449	Wang M	2016-06-13	Nat Commun
PPFIBP2	rs61890184	11p15.4	1e-07	GWASTABLE	29892016	Schumacher FR	2018-08-14	Nat Genet
PRCR1	rs16901979	8q24.21	5e-09	GWASTABLE	25939597	Berndt SI	2016-02-12	Nat Commun
PRDM15	rs6586243	21q22.3	7.79x10-6	literature	19117981	Sun J, Zheng SL, Wiklund F, Isaacs SD, Li G, Wiley KE. Et al. Sequence variants at 22q13 are associated with prostate cancer risk. Cancer Res. 2009 Jan 1;69(1):10-5.
PRKAG2	rs11763144	7q35-q36	0.008	literature	21373201	Campa D, H?sing A, Stein A, Dostal L, Boeing H, Pischon T, et al. Genetic variability of the mTOR pathway and prostate cancer risk in the European Prospective Investigation on Cancer (EPIC). PLoS One. 2011 Feb 23;6(2):e16914.
PRKCI	rs4955720	3q26.3	0.007	literature	21373201	Campa D, H?sing A, Stein A, Dostal L, Boeing H, Pischon T, et al. Genetic variability of the mTOR pathway and prostate cancer risk in the European Prospective Investigation on Cancer (EPIC). PLoS One. 2011 Feb 23;6(2):e16914.
PRKCI	rs546950	3q26.3	0.002	literature	21373201	Campa D, H?sing A, Stein A, Dostal L, Boeing H, Pischon T, et al. Genetic variability of the mTOR pathway and prostate cancer risk in the European Prospective Investigation on Cancer (EPIC). PLoS One. 2011 Feb 23;6(2):e16914.
PRKCI	rs71277158	3q26.2	8e-14	GWASTABLE	25939597	Berndt SI	2015-05-05	Nat Commun
PRKCI	rs71277158	3q26.2	8e-14	GWASTABLE	25939597	Berndt SI	2016-02-12	Nat Commun
PRNCR1	rs1016343	8q24.21	6e-21	GWASTABLE	26034056	Hoffmann TJ	2016-07-15	Cancer Discov
PRNCR1	rs116041037	8q24.21	6e-10	GWASTABLE	26034056	Hoffmann TJ	2016-07-15	Cancer Discov
PRNCR1	rs13252298	8q24.21	4e-06	GWASTABLE	21743057	Schumacher FR	2011-07-30	Hum Mol Genet
PRNCR1	rs13252298	8q24.21	2e-06	GWASTABLE	26034056	Hoffmann TJ	2016-07-15	Cancer Discov
PRNCR1	rs13254738	8q24.21	4e-10	GWASTABLE	22923026	Cheng I	2012-10-23	Cancer Epidemiol Biomarkers Prev
PRNCR1	rs1456315	8q24.21	2e-29	GWASTABLE	20676098	Takata R	2010-09-11	Nat Genet
PRNCR1	rs1456315	8q24.21	1e-12	GWASTABLE	23023329	Xu J	2012-12-11	Nat Genet
PRNCR1	rs16901979	8q24.21	1e-12	GWASTABLE	17401366	Gudmundsson J	2008-06-16	Nat Genet
PRNCR1	rs16901979	8q24.21	3e-14	GWASTABLE	19767754	Gudmundsson J	2009-10-05	Nat Genet
PRNCR1	rs183373024	8q24.21	4e-160	GWASTABLE	29892016	Schumacher FR	2018-08-14	Nat Genet
PRNCR1	rs56005245	8q24.21	1e-08	GWASTABLE	27262462	Teerlink CC	2016-06-04	Hum Genet
PRNCR1	rs56005245	8q24.21	1e-08	GWASTABLE	27262462	Teerlink CC	2017-02-03	Hum Genet
PRNCR1	rs6983561	8q24.21	5e-19	GWASTABLE	26034056	Hoffmann TJ	2016-07-15	Cancer Discov
PRNCR1	rs6983561	8q24.21	4e-13	GWASTABLE	22923026	Cheng I	2012-10-23	Cancer Epidemiol Biomarkers Prev
PRNCR1	rs72725879	8q24.21	3e-08	GWASTABLE	26034056	Hoffmann TJ	2016-07-15	Cancer Discov
PRNCR1	rs10505483	8q24.21	7e-15	GWASTABLE	22923026	Cheng I	2012-10-23	Cancer Epidemiol Biomarkers Prev
PRNCR1	rs6983561	8q24.21	6e-22	GWASTABLE	26034056	Hoffmann TJ	2016-07-15	Cancer Discov
PRPH	rs10875943	12q12-q13	6.9x10-12	literature	21743467	Kote-Jarai Z, Olama AA, Giles GG, Severi G, Schleutker J, Weischer M, Campa D, et al. Seven prostate cancer susceptibility loci identified by a multi-stage genome-wide association study. Nat Genet. 2011 Jul 10;43(8):785-91.
PTGFRN	rs2806864	1p13.1	6e-07	erdisfanct/nggri	20932654	Kerns SL, Ostrer H, Stock R, Genome-wide association study to identify single nucleotide polymorphisms (SNPs) associated with the development of erectile dysfunction in African-American men after radiotherapy for prostate cancer. 2010 Dec 1;78(5):1292-300.
PTMAP1	rs12665339	6p21.33	6e-09	GWASTABLE	29892016	Schumacher FR	2018-08-14	Nat Genet
PTPRU	rs1866967 x rs8102476	1p35.3 x 19q13.2	5e-06	GWASTABLE	22219177	Tao S	2012-03-31	Carcinogenesis
PTPRU	rs1866967 x rs8102476	1p35.3 x 19q13.2	5e-06	GWASTABLE	22219177	Tao S	2012-01-04	Carcinogenesis
RAB14	rs942152	9q32-q34.11	0.002	literature	18073375	Duggan D, Zheng SL, Knowlton M, Benitez D, Dimitrov L, Wiklund F, Robbins C. et al. Two genome-wide association studies of aggressive prostate cancer implicate putative prostate tumor suppressor gene DAB2IP. J Natl Cancer Inst. 2007 Dec 19;99(24):1836-44.
RACGAP1	rs615382	12q13	0.009	literature	22801071	Ricks-Santi LJ, Apprey V, Mason T, Wilson B, Abbas M, et al. Identification of genetic risk associated with prostate cancer using ancestry informative markers. Prostate Cancer Prostatic Dis. 2012 Dec;15(4):359-64
RAD23B	rs817826	9q31.2	5.45x10-14	literature	23023329	Xu J, Mo Z, Ye D, Wang M, Liu F, Jin G, Xu C, Wang X, et al. Genome-wide association study in Chinese men identifies two new prostate cancer risk loci at 9q31.2 and 19q13.4. Nat Genet. 2012 Nov;44(11):1231-5.
RAD51B	rs7141529	14q23-q24.2	2.77x10-10	literature	23535732	Eeles RA, Olama AA, Benlloch S, Saunders EJ, Leongamornlert DA, Tymrakiewicz M, et al. Identification of 23 new prostate cancer susceptibility loci using the iCOGS custom genotyping array. Nat Genet. 2013 Apr;45(4):385-91.
RAD51B	rs7141529	14q24.1	3e-10	GWASTABLE	23535732	Eeles RA	2013-09-16	Nat Genet
RAD51B	rs7141529	14q24.1	2e-10	GWASTABLE	29892016	Schumacher FR	2018-08-14	Nat Genet
RAI2	rs16980679	Xp22.13	3e-15	GWASTABLE	28139693	Hoffmann TJ	2017-01-31	Nat Commun
RAI2	rs16980679	Xp22.13	3e-15	GWASTABLE	28139693	Hoffmann TJ	2017-05-25	Nat Commun
RAL2	rs16980679	Xp22.13	3e-15	GWAS Database	28139693	Thomas J Hoffman et al. 2016
RASA1	rs35148638	5q14.3	6.49x10-9	literature	25939597	Sonja I. Berndt
RASA1	rs35148638	5q14.3	6e-09	GWASTABLE	25939597	Berndt SI	2016-02-13	Nat Commun
RASSF3	rs7968403	12q14.2	3e-12	GWASTABLE	29892016	Schumacher FR	2018-08-14	Nat Genet
RBFOX1	rs112896149	16p13.3	5e-06	GWASTABLE	29356057	Du Z	2018-07-03	Prostate
RFX6	rs12202378	6q22.31	8.8x10-8	literature	21637779	Haiman CA, Chen GK, Blot WJ, Strom SS, Berndt SI, Kittles RA. Et al. Characterizing genetic risk at known prostate cancer susceptibility loci in African Americans. PLoS Genet. 2011 May;7(5):e1001387.
RFX6	rs339331	6q22.31	2e-12	nggri	19767754	Gudmundsson J, Sulem P, Gudbjartsson DF, Genome-wide association and replication studies identify four variants associated with prostate cancer susceptibility. 2009 Oct;41(10):1122-6.
RFX6	rs339331	6q22.31	3.1x10-6	literature	21637779	Haiman CA, Chen GK, Blot WJ, Strom SS, Berndt SI, Kittles RA. Et al. Characterizing genetic risk at known prostate cancer susceptibility loci in African Americans. PLoS Genet. 2011 May;7(5):e1001387.
RFX6	rs339331	6q22.31	4.43x10-5	literature	22099997	Liu M, Wang J, Xu Y, Wei D, Shi X, Yang Z. Risk loci on chromosome 8q24 are associated with prostate cancer in northern Chinese men. J Urol. 2012 Jan;187(1):315-21.
RFX6	rs339331	6q22.31	4.43x10-5	literature	22114074	Wang M, Liu F, Hsing AW, Wang X, Shao Q. et al. Replication and cumulative effects of GWAS-identified genetic variations for prostate cancer in Asians: a case-control study in the ChinaPCa consortium. Carcinogenesis. 2012 Feb;33(2):356-60.
RFX6	rs339331	6q22.1	4e-11	GWASTABLE	26443449	Wang M	2015-10-07	Nat Commun
RFX6	rs339331	6q22.1	1e-06	GWASTABLE	26034056	Hoffmann TJ	2016-07-15	Cancer Discov
RFX6	rs339331	6q22.1	6e-07	GWASTABLE	26034056	Hoffmann TJ	2016-07-15	Cancer Discov
RFX6	rs339331	6q22.1	4e-11	GWASTABLE	26443449	Wang M	2016-06-13	Nat Commun
RFX7	rs33984059	15q21.3	1e-08	GWASTABLE	29892016	Schumacher FR	2018-08-14	Nat Genet
RGS17	rs1933488	6q25.2	4e-18	GWAS Database	23535732	Al Olama et al. multiple novel 2015
RGS17	rs1933488	6q25.2	4e-18	GWASTABLE	23535732	Eeles RA	2013-09-16	Nat Genet
RGS17	rs1933488	6q25.2	4e-21	GWASTABLE	29892016	Schumacher FR	2018-08-14	Nat Genet
RMST	rs75718479	12q23.1	1e-06	GWAS Database	26443449	Meilin Wang et al. 2015
RMST	rs75718479	12q23.1	1e-06	GWASTABLE	26443449	Wang M	2016-06-13	Nat Commun
RN7SKP114	rs10122495	9p13.3	1e-08	GWASTABLE	29892016	Schumacher FR	2018-08-14	Nat Genet
RNA5SP471	rs118005503	19q12	7e-09	GWASTABLE	29892016	Schumacher FR	2018-08-14	Nat Genet
RNASE9	rs1243647 x rs12418451	14q11.2 x 11q13.3	1e-06	GWASTABLE	22219177	Tao S	2012-01-04	Carcinogenesis
RNASE9	rs1243647 x rs12418451	14q11.2 x 11q13.3	1e-06	GWASTABLE	22219177	Tao S	2012-03-31	Carcinogenesis
RNASEL	rs486907	1q25	0.004	literature	20086112	Beuten J, Gelfond JA, Franke JL, Shook S, Johnson-Pais TL, Thompson IM, Leach RJ. Single and multivariate associations of MSR1, ELAC2, and RNASEL with prostate cancer in an ethnic diverse cohort of men. Cancer Epidemiol Biomarkers Prev. 2010 Feb;19(2):588-99.
RNASEL	rs627928	1q25	0.03	literature	20086112	Beuten J, Gelfond JA, Franke JL, Shook S, Johnson-Pais TL, Thompson IM, Leach RJ. Single and multivariate associations of MSR1, ELAC2, and RNASEL with prostate cancer in an ethnic diverse cohort of men. Cancer Epidemiol Biomarkers Prev. 2010 Feb;19(2):588-99.
RNASEL	rs682585	1q25	0.007	literature	20086112	Beuten J, Gelfond JA, Franke JL, Shook S, Johnson-Pais TL, Thompson IM, Leach RJ. Single and multivariate associations of MSR1, ELAC2, and RNASEL with prostate cancer in an ethnic diverse cohort of men. Cancer Epidemiol Biomarkers Prev. 2010 Feb;19(2):588-99.
RNLS	rs1935581	10q23.31	7e-09	GWASTABLE	29892016	Schumacher FR	2018-08-14	Nat Genet
RNU6	rs10793821	5q31.1	5e-11	GWASTABLE	29892016	Schumacher FR	2018-08-14	Nat Genet
RNU6	rs10793821	5q31.1	9e-07	GWASTABLE	29892016	Schumacher FR	2018-08-14	Nat Genet
RNU6	rs10845938	12p13.1	1e-12	GWASTABLE	29892016	Schumacher FR	2018-08-14	Nat Genet
RNU6	rs10845938	12p13.1	9e-07	GWASTABLE	29892016	Schumacher FR	2018-08-14	Nat Genet
RNU6	rs10845938	12p13.1	7e-08	GWASTABLE	29892016	Schumacher FR	2018-08-14	Nat Genet
RNU6	rs5799921	12q21.33	7e-12	GWASTABLE	29892016	Schumacher FR	2018-08-14	Nat Genet
RNU6	rs5799921	12q21.33	1e-06	GWASTABLE	29892016	Schumacher FR	2018-08-14	Nat Genet
RNU6-66P	rs9600079	13q22.1	3e-09	GWASTABLE	20676098	Takata R	2010-09-11	Nat Genet
RP1	rs4711748	6p21.1	3e-08	GWASTABLE	29892016	Schumacher FR	2018-08-14	Nat Genet
RP1	rs80130819	12q13.11	2e-09	GWASTABLE	25217961	Al Olama AA	2014-09-14	Nat Genet
RP1	rs80130819	12q13.11	2e-09	GWASTABLE	25217961	Al Olama AA	2015-05-07	Nat Genet
RP1	rs80130819	12q13.11	4e-08	GWASTABLE	25217961	Al Olama AA	2015-05-07	Nat Genet
RP11	rs142444269	17q11.2	3e-10	GWASTABLE	29892016	Schumacher FR	2018-08-14	Nat Genet
RP11	rs201158093	16q23.3	9e-09	GWASTABLE	29892016	Schumacher FR	2018-08-14	Nat Genet
RP11	rs201158093	16q23.3	6e-07	GWASTABLE	29892016	Schumacher FR	2018-08-14	Nat Genet
RP11	rs547171081	11p11.2	3e-08	GWASTABLE	29892016	Schumacher FR	2018-08-14	Nat Genet
RP11	rs56391074	1p22.3	2e-08	GWASTABLE	29892016	Schumacher FR	2018-08-14	Nat Genet
RPL23AP61	rs10993994	10q11.22	5e-17	GWASTABLE	23269536	Sun J	2013-03-22	Hum Genet
RPL23AP61	rs10993994	10q11.22	1e-50	GWASTABLE	28139693	Hoffmann TJ	2017-05-25	Nat Commun
RPL23AP61	rs3123078	10q11.22	1e-19	GWASTABLE	19767753	Eeles RA	2009-12-29	Nat Genet
RPS25P10	rs5759167	22q13.2	2e-09	GWASTABLE	26034056	Hoffmann TJ	2016-07-15	Cancer Discov
RPS25P10	rs5759167	22q13.2	6e-29	GWASTABLE	19767753	Eeles RA	2009-12-29	Nat Genet
RPS25P10	rs5759167	22q13.2	6e-71	GWASTABLE	29892016	Schumacher FR	2018-08-14	Nat Genet
RRAGB	rs10855058	Xp11.21	1e-08	GWASTABLE	28139693	Hoffmann TJ	2017-01-31	Nat Commun
RSG17	rs1933488		4.34x10-18	literature	23535732	Eeles RA, Olama AA, Benlloch S, Saunders EJ, Leongamornlert DA, Tymrakiewicz M, et al. Identification of 23 new prostate cancer susceptibility loci using the iCOGS custom genotyping array. Nat Genet. 2013 Apr;45(4):385-91.
RUVBL1	rs7641133	3q21	1.0x10-4	literature	21637779	Haiman CA, Chen GK, Blot WJ, Strom SS, Berndt SI, Kittles RA. Et al. Characterizing genetic risk at known prostate cancer susceptibility loci in African Americans. PLoS Genet. 2011 May;7(5):e1001387.
RXRA	rs3118536	9q34	0.02	literature	22844442	Huang SP, Bao BY, Hour TC, Huang CY, Yu CC, Liu CC, Lee YC, Huang CN, Pao JB, Huang CH. Genetic variants in CASP3, BMP5, and IRS2 genes may influence survival in prostate cancer patients receiving androgen-deprivation therapy. PLoS One. 2012;7(7):e41219.
SALL	rs7241993	16q12.1	2.19x10-9	literature	23535732	Eeles RA, Olama AA, Benlloch S, Saunders EJ, Leongamornlert DA, Tymrakiewicz M, et al. Identification of 23 new prostate cancer susceptibility loci using the iCOGS custom genotyping array. Nat Genet. 2013 Apr;45(4):385-91.
SALL3	rs7241993	18q23	2e-09	GWAS Database	23535732	Eeles RA, Olama AA, Benlloch S et al. Identification of 23 new prostate cancer susceptibility loci using the iCOGS custom genotyping array. Nat Genet. 2013 Apr;45(4):385-91, 391e1-2. doi: 10.1038/ng.2560.
SALL3	rs7241993	18q23	2e-09	GWASTABLE	23535732	Eeles RA	2013-09-16	Nat Genet
SALL3, ATP9B	rs7241993	18q23	2e-09	GWASTABLE	23535732	Eeles RA	2013-04-01	Nat Genet
SERPINA3	rs8023057	14q32.13	2e-15	GWASTABLE	28139693	Hoffmann TJ	2017-01-31	Nat Commun
SHROOM2	rs2405942	Xp22.2	2.37x10-10	literature	23535732	Eeles RA, Olama AA, Benlloch S, Saunders EJ, Leongamornlert DA, Tymrakiewicz M, et al. Identification of 23 new prostate cancer susceptibility loci using the iCOGS custom genotyping array. Nat Genet. 2013 Apr;45(4):385-91.
SHROOM2	rs2405942	Xp22.2	2e-12	GWASTABLE	29892016	Schumacher FR	2018-08-14	Nat Genet
SIDT1	rs7611694	3q13.31	3.80x10-13	literature	23535732	Eeles RA, Olama AA, Benlloch S, Saunders EJ, Leongamornlert DA, Tymrakiewicz M, et al. Identification of 23 new prostate cancer susceptibility loci using the iCOGS custom genotyping array. Nat Genet. 2013 Apr;45(4):385-91.
SIX1	rs7153648	14q23.1	2e-09	GWASTABLE	25217961	Al Olama AA	2014-09-14	Nat Genet
SIX1	rs7153648	14q23.1	2e-09	GWASTABLE	25217961	Al Olama AA	2015-05-07	Nat Genet
SKIL	rs10936632	3q26.2	3e-34	GWASTABLE	29892016	Schumacher FR	2018-08-14	Nat Genet
SLC10A2	rs1529276	13q33.1	2e-06	GWASTABLE	17903305	Murabito JM	2008-09-17	BMC Med Genet
SLC19A2	rs3737683	1q23.3	1.27x10-4	literature	21960693	Feng J, Sun J, Kim ST, Lu Y, Wang Z, Zhang Z, Gronberg H, Isaacs WB, Zheng SL, Xu J. A genome-wide survey over the ChIP-on-chip identified androgen receptor-binding genomic regions identifies a novel prostate cancer susceptibility locus at 12q13.13. Cancer Epidemiol Biomarkers Prev. 2011 Nov;20(11):2396-403.
SLC19A2	rs3765227	1q23.3	1.26x10-4	literature	21960693	Feng J, Sun J, Kim ST, Lu Y, Wang Z, Zhang Z, Gronberg H, Isaacs WB, Zheng SL, Xu J. A genome-wide survey over the ChIP-on-chip identified androgen receptor-binding genomic regions identifies a novel prostate cancer susceptibility locus at 12q13.13. Cancer Epidemiol Biomarkers Prev. 2011 Nov;20(11):2396-403.
SLC22A1	rs4646284		1.3x10-23	GWAS Database	28139693	Thomas J. Hoffman et al. 2016
SLC22A1	rs651164	6q25.3	1.4x10-13	literature	21743057	Schumacher FR, Berndt SI, Siddiq A, Jacobs KB. Et al. Genome-wide association study identifies new prostate cancer susceptibility loci. Hum Mol Genet. 2011 Oct 1;20(19):3867-75.
SLC22A1	rs651164	6q25.3	2e-10	GWASTABLE	21743057	Schumacher FR	2011-07-30	Hum Mol Genet
SLC22A1	rs651164	6q25.3	2e-09	GWASTABLE	19767753	Eeles RA	2009-12-29	Nat Genet
SLC22A2	rs4646284	6q25.3	1e-19	GWASTABLE	26034056	Hoffmann TJ	2016-07-15	Cancer Discov
SLC22A2	rs4646284G	6q25.3	1e-19	GWASTABLE	26034056	Hoffmann TJ	2015-06-01	Cancer Discov
SLC22A3	rs3123636	6q25.3	3e-09	GWASTABLE	27262462	Teerlink CC	2016-06-04	Hum Genet
SLC22A3	rs3123636	6q25.3	3e-09	GWASTABLE	27262462	Teerlink CC	2017-02-03	Hum Genet
SLC22A3	rs4646284	6q25.3	3.2x10-52	GWAS Database	28139693	Thomas J. Hoffman et al. 2016
SLC22A3	rs7758229	6q25.3	4e-12	GWASTABLE	25939597	Berndt SI	2015-05-05	Nat Commun
SLC22A3	rs7758229	6q25.3	4e-12	GWASTABLE	25939597	Berndt SI	2016-02-12	Nat Commun
SLC22A3	rs9364554	6q25.3	5.5x10-10	literature	18264097	Eeles RA, Kote-Jarai Z, Giles GG, Olama AA, Guy M, Jugurnauth SK, Mulholland S, Leongamornlert DA, et al. Multiple newly identified loci associated with prostate cancer susceptibility. Nat Genet. 2008 Mar;40(3):316-21.
SLC22A3	rs9364554	6q25.3	4.4x10-5	literature	19366831	Fitzgerald LM, Kwon EM, Koopmeiners JS, Salinas CA, Stanford JL, Ostrander EA. Analysis of recently identified prostate cancer susceptibility loci in a population-based study: associations with family history and clinical features. Clin Cancer Res. 2009 May 1;15(9):3231-7.
SLC22A3	rs9364554	6q25.3	5.00x10-4	literature	22730461	Grisanzio C, Werner L, Takeda D, Awoyemi BC, Pomerantz MM. et al. Genetic and functional analyses implicate the NUDT11, HNF1B, and SLC22A3 genes in prostate cancer pathogenesis. Proc Natl Acad Sci U S A. 2012 Jul 10;109(28):11252-7.
SLC22A3	rs9364554	6q25.3	6e-10	nggri	19767754	Gudmundsson J, Sulem P, Gudbjartsson DF, Genome-wide association and replication studies identify four variants associated with prostate cancer susceptibility. 2009 Oct;41(10):1122-6.
SLC22A3	rs9364554	6q25.3	8.2x10-4	literature	21637779	Haiman CA, Chen GK, Blot WJ, Strom SS, Berndt SI, Kittles RA. Et al. Characterizing genetic risk at known prostate cancer susceptibility loci in African Americans. PLoS Genet. 2011 May;7(5):e1001387.
SLC22A3	rs9364554	6q25.3	1.91x10-3	literature	20564319	Kim ST, Cheng Y, Hsu FC, Jin T, Kader AK, Zheng SL, Isaacs WB, Xu J, Sun J. Prostate cancer risk-associated variants reported from genome-wide association studies: meta-analysis and their contribution to genetic Variation. Prostate. 2010 Dec 1;70(16):1729-38.
SLC22A3	rs9364554	6q25.3	3x10-6	literature	18708398	Kote-Jarai Z, Easton DF, Stanford JL, Ostrander EA, Schleutker J, Ingles SA, et al. Multiple novel prostate cancer predisposition loci confirmed by an international study: the PRACTICAL Consortium. Cancer Epidemiol Biomarkers Prev. 2008 Aug;17(8):2052-61.
SLC22A3	rs9364554	6q25.3	0.0008	literature	21390317	Lindstrom S, Schumacher F, Siddiq A, Travis RC, Campa D, et al. Characterizing associations and SNP-environment interactions for GWAS-identified prostate cancer risk markers--results from BPC3. PLoS One. 2011 Feb 24;6(2):e17142.
SLC22A3	rs9364554	6q25.3	0.001	literature	20690139	Liu H, Wang B, Han C. Meta-analysis of genome-wide and replication association studies on prostate cancer. Prostate. 2011 Feb 1;71(2):209-24.
SLC22A3	rs9364554	6q25.3	0.02	literature	22459122	Tsilidis KK, Travis RC, Appleby PN, Allen NE, Lindstrom S, Schumacher FR, et al. Interactions between genome-wide significant genetic variants and circulating concentrations of insulin-like growth factor 1, sex hormones, and binding proteins in relation to prostate cancer risk in the National Cancer Institute Breast and Prostate Cancer Cohort Consortium. Am J Epidemiol. 2012 May 1;175(9):926-35.
SLC22A3	rs9364554	6q25.3	0.002	literature	21456070	Xu Z, Bensen JT, Smith GJ, Mohler JL, Taylor JA. GWAS SNP Replication among African American and European American men in the North Carolina-Louisiana prostate cancer project (PCaP). Prostate. 2011 Jun 1;71(8):881-91.
SLC22A3	rs9364554	6q25.3	9.3x10-7	literature	19639606	Zhong H, Prentice RL. Correcting "winner's curse" in odds ratios from genomewide association findings for major complex human diseases. Genet Epidemiol. 2010 Jan;34(1):78-91.
SLC22A3	rs9364554	6q25.3	6e-12	GWASTABLE	26034056	Hoffmann TJ	2015-06-01	Cancer Discov
SLC22A3	rs9364554	6q25.3	6e-10	GWASTABLE	18264097	Eeles RA	2008-06-16	Nat Genet
SLC22A3	rs9364554	6q25.3	6e-12	GWASTABLE	26034056	Hoffmann TJ	2016-07-15	Cancer Discov
SLC22A3	rs9364554	6q25.3	5e-33	GWASTABLE	29892016	Schumacher FR	2018-08-14	Nat Genet
SLC25A37	rs2928679	8p21.2	2.64x10-1	literature	19767753	Eeles RA, Kote-Jarai Z, Al Olama AA, Giles GG, Guy M, Severi G, Muir K. et al. Identification of seven new prostate cancer susceptibility loci through a genome-wide association study. Nat Genet. 2009 Oct;41(10):1116-21.
SLC25A37	rs2928679	8p21.2	0.003	literature	21390317	Lindstrom S, Schumacher F, Siddiq A, Travis RC, Campa D, et al. Characterizing associations and SNP-environment interactions for GWAS-identified prostate cancer risk markers--results from BPC3. PLoS One. 2011 Feb 24;6(2):e17142.
SLC25A37	rs2928679	8p21.2	2e-11	GWASTABLE	29892016	Schumacher FR	2018-08-14	Nat Genet
SLC25A37	rs4614003	8p21.2	1e-15	GWASTABLE	28139693	Hoffmann TJ	2017-01-31	Nat Commun
SLC25A37	rs4614003	8p21.2	1e-15	GWASTABLE	28139693	Hoffmann TJ	2017-05-25	Nat Commun
SLC41A1	rs1775148	1q32.1	4e-08	GWASTABLE	25217961	Al Olama AA	2014-09-14	Nat Genet
SLC41A1	rs1775148	1q32.1	4e-08	GWASTABLE	25217961	Al Olama AA	2015-05-07	Nat Genet
SLC41A1	rs6679073	1q32.1	4e-15	GWASTABLE	25434496	Kim S	2014-11-27	Gene
SLC41A1	rs6679073	1q32.1	4e-15	GWASTABLE	25434496	Kim S	2015-07-10	Gene
SLC45A3	rs12409639	1q32.1	2.36x10-19	literature	23269536	Sun J, Tao S, Gao Y, Peng T, Tan A, Zhang H, Yang X, Qin X, Hu Y, et al. Genome-wide association study identified novel genetic variant on SLC45A3 gene associated with serum levels prostate-specific antigen (PSA) in a Chinese population. Hum Genet. 2013 Apr;132(4):423-9.
SLC45A3	rs12409639	1q32.1	2e-19	GWASTABLE	23269536	Sun J	2013-03-22	Hum Genet
SLC45A3	rs16856139	1q32.1	2e-11	GWAS Database	24919509	Terao C
SLC45A3	rs16856139	1q32.1	2e-11	GWASTABLE	24919509	Terao C	2014-12-11	J Med Genet
SLC45A3	rs2153904	1q32.1	1e-13	GWAS Database	25434496	Kim S
SLC45A3	rs2153904	1q32.1	1e-13	GWASTABLE	25434496	Kim S	2015-07-10	Gene
SLC45A3	rs4951018	1q32.1	1e-08	GWASTABLE	28139693	Hoffmann TJ	2017-01-31	Nat Commun
SLC45A3	rs4951018	1q32.1	1e-08	GWASTABLE	28139693	Hoffmann TJ	2017-05-25	Nat Commun
SLC7A	rs6625711	Xq13.1	6e-07	GWASTABLE	25217961	Al Olama AA	2014-09-14	Nat Genet
SMAD9	rs140971918	13q13.3	4e-06	GWASTABLE	29356057	Du Z	2018-07-03	Prostate
SNX16	rs13264970 x rs1571801	8q21.13 x 9q33.2	4e-06	GWASTABLE	22219177	Tao S	2012-03-31	Carcinogenesis
SNX16	rs13264970 x rs1571801	8q21.13 x 9q33.2	4e-06	GWASTABLE	22219177	Tao S	2012-01-04	Carcinogenesis
SOX9	rs4793529	17q24.3	2e-13	GWASTABLE	24753544	Knipe DW	2014-04-21	Cancer Epidemiol Biomarkers Prev
SOX9	rs4793529	17q24.3	2e-13	GWASTABLE	24753544	Knipe DW	2014-11-07	Cancer Epidemiol Biomarkers Prev
SP8	rs12155172	7p21.2	4.95x10-13	literature	23535732	Eeles RA, Olama AA, Benlloch S, Saunders EJ, Leongamornlert DA, Tymrakiewicz M, et al. Identification of 23 new prostate cancer susceptibility loci using the iCOGS custom genotyping array. Nat Genet. 2013 Apr;45(4):385-91.
SP8	rs12155172	7p15.3	5e-13	GWASTABLE	23535732	Eeles RA	2013-09-16	Nat Genet
SPATA16	rs11720607 x rs10486567	3q26.31 x 7p15.1	5e-06	GWASTABLE	22219177	Tao S	2012-03-31	Carcinogenesis
SPATA16	rs11720607 x rs10486567	3q26.31 x 7p15.1	5e-06	GWASTABLE	22219177	Tao S	2012-01-04	Carcinogenesis
SRRM1P1	rs12682344	8q24.21	5e-12	GWASTABLE	24753544	Knipe DW	2014-04-21	Cancer Epidemiol Biomarkers Prev
SRRM1P1	rs12682344	8q24.21	5e-12	GWASTABLE	24753544	Knipe DW	2014-11-07	Cancer Epidemiol Biomarkers Prev
SRRM1P1	rs6983267	8q24.21	4e-15	GWASTABLE	24753544	Knipe DW	2014-04-21	Cancer Epidemiol Biomarkers Prev
SRRM1P1	rs6983267	8q24.21	4e-15	GWASTABLE	24753544	Knipe DW	2014-11-07	Cancer Epidemiol Biomarkers Prev
STAT3	rs744166	17q21	0.03	literature	22542949	Kwon EM, Holt SK, Fu R, Kolb S, Williams G, Stanford JL, Ostrander EA. Androgen metabolism and JAK/STAT pathway genes and prostate cancer risk. Cancer Epidemiol. 2012 Aug;36(4):347-53.
STMN3	rs6062509	20q13.33	4e-16	GWASTABLE	23535732	Eeles RA	2013-04-01	Nat Genet
SUCLG2	rs76010824	3p14.1	1e-07	GWASTABLE	26307654	Szulkin R	2016-08-22	Cancer Epidemiol Biomarkers Prev
SUGCT	rs17621345	7p14.1	7e-14	GWASTABLE	29892016	Schumacher FR	2018-08-14	Nat Genet
SULT2A1	rs182420	19q13.3	0.04	literature	22542949	Kwon EM, Holt SK, Fu R, Kolb S, Williams G, Stanford JL, Ostrander EA. Androgen metabolism and JAK/STAT pathway genes and prostate cancer risk. Cancer Epidemiol. 2012 Aug;36(4):347-53.
SUMO1P1	rs6091758	20q13.2	2e-07	GWASTABLE	29892016	Schumacher FR	2018-08-14	Nat Genet
SYK	rs290258 x rs7679673	9q22.2 x 4q24	1e-06	GWASTABLE	22219177	Tao S	2012-03-31	Carcinogenesis
SYK	rs290258 x rs7679673	9q22.2 x 4q24	1e-06	GWASTABLE	22219177	Tao S	2012-01-04	Carcinogenesis
TBX1	rs2238776	22q11.21	2e-08	GWASTABLE	25217961	Al Olama AA	2014-09-14	Nat Genet
TBX1	rs2238776	22q11.21	2e-08	GWASTABLE	25217961	Al Olama AA	2015-05-07	Nat Genet
TBX1	rs2238776	22q11.21	2e-07	GWASTABLE	25217961	Al Olama AA	2015-05-07	Nat Genet
TBX3	rs11067228	12q24.21	1e-14	GWASTABLE	28139693	Hoffmann TJ	2017-01-31	Nat Commun
TBX3	rs11067228	12q24.21	1e-14	GWASTABLE	28139693	Hoffmann TJ	2017-05-25	Nat Commun
TBX5	rs10774740	12q24.21	3e-10	GWASTABLE	25939597	Berndt SI	2015-05-05	Nat Commun
TBX5	rs10774740	12q24.21	3e-10	GWASTABLE	25939597	Berndt SI	2016-02-12	Nat Commun
TBX5	rs1270884	12q24.1	6.75x10-11	literature	23535732	Eeles RA, Olama AA, Benlloch S, Saunders EJ, Leongamornlert DA, Tymrakiewicz M, et al. Identification of 23 new prostate cancer susceptibility loci using the iCOGS custom genotyping array. Nat Genet. 2013 Apr;45(4):385-91.
TBX5	rs1270884	12q24.21	7e-11	GWASTABLE	23535732	Eeles RA	2013-09-16	Nat Genet
TBX5	rs1270884	12q24.21	1e-18	GWASTABLE	29892016	Schumacher FR	2018-08-14	Nat Genet
TCF2	rs11649743	17q12	7.55x10-8	literature	21390317	Lindstrom S, Schumacher F, Siddiq A, Travis RC, Campa D, et al. Characterizing associations and SNP-environment interactions for GWAS-identified prostate cancer risk markers--results from BPC3. PLoS One. 2011 Feb 24;6(2):e17142.
TCF2	rs11649743	17q12	7.5x10-8	literature	19117981	Sun J, Zheng SL, Wiklund F, Isaacs SD, Li G, Wiley KE. Et al. Sequence variants at 22q13 are associated with prostate cancer risk. Cancer Res. 2009 Jan 1;69(1):10-5.
TCF2	rs11649743	17q12	0.04	literature	22459122	Tsilidis KK, Travis RC, Appleby PN, Allen NE, Lindstrom S, Schumacher FR, et al. Interactions between genome-wide significant genetic variants and circulating concentrations of insulin-like growth factor 1, sex hormones, and binding proteins in relation to prostate cancer risk in the National Cancer Institute Breast and Prostate Cancer Cohort Consortium. Am J Epidemiol. 2012 May 1;175(9):926-35.
TCF2	rs2005705	17q12	1e-06	GWASTABLE	24740154	Lange EM	2014-04-16	PLoS One
TCF2	rs4430796	17q12	0.001	literature	17603485	Gudmundsson J, Sulem P, Steinthorsdottir V, Bergthorsson JT, Thorleifsson G, Manolescu A, Rafnar T, et al. Two variants on chromosome 17 confer prostate cancer risk, and the one in TCF2 protects against type 2 diabetes. Nat Genet. 2007 Aug;39(8):977-83. Epub 2007 Jul 1.
TCF2	rs4430796	17q12	0.008	literature	19902474	Hooker S, Hernandez W, Chen H, Robbins C, Torres JB, Ahaghotu C, Carpten J, Kittles RA. Replication of prostate cancer risk loci on 8q24, 11q13, 17q12, 19q33, and Xp11 in African Americans. Prostate. 2010 Feb 15;70(3):270-5.
TCF2	rs4430796	17q12	0.009	literature	18701471	Levin AM, Machiela MJ, Zuhlke KA, Ray AM, Cooney KA, Douglas JA. Chromosome 17q12 variants contribute to risk of early-onset prostate cancer. Cancer Res. 2008 Aug 15;68(16):6492-5.
TCF2	rs4430796	17q12	2.09x10-28	literature	21390317	Lindstrom S, Schumacher F, Siddiq A, Travis RC, Campa D, et al. Characterizing associations and SNP-environment interactions for GWAS-identified prostate cancer risk markers--results from BPC3. PLoS One. 2011 Feb 24;6(2):e17142.
TCF2	rs4430796	17q12	3.53x10-9	literature	22459122	Tsilidis KK, Travis RC, Appleby PN, Allen NE, Lindstrom S, Schumacher FR, et al. Interactions between genome-wide significant genetic variants and circulating concentrations of insulin-like growth factor 1, sex hormones, and binding proteins in relation to prostate cancer risk in the National Cancer Institute Breast and Prostate Cancer Cohort Consortium. Am J Epidemiol. 2012 May 1;175(9):926-35.
TCF2	rs7501939	17q12	2.78x10-20	literature	18264097	Eeles RA, Kote-Jarai Z, Giles GG, Olama AA, Guy M, Jugurnauth SK, Mulholland S, Leongamornlert DA, et al. Multiple newly identified loci associated with prostate cancer susceptibility. Nat Genet. 2008 Mar;40(3):316-21.
TCF2	rs7501939	17q12	0.001	literature	17603485	Gudmundsson J, Sulem P, Steinthorsdottir V, Bergthorsson JT, Thorleifsson G, Manolescu A, Rafnar T, et al. Two variants on chromosome 17 confer prostate cancer risk, and the one in TCF2 protects against type 2 diabetes. Nat Genet. 2007 Aug;39(8):977-83. Epub 2007 Jul 1.
TCF2	rs7501939	17q12	0.008	literature	18701471	Levin AM, Machiela MJ, Zuhlke KA, Ray AM, Cooney KA, Douglas JA. Chromosome 17q12 variants contribute to risk of early-onset prostate cancer. Cancer Res. 2008 Aug 15;68(16):6492-5.
TCF2	rs7501939	17q12	2.78x10-20	literature	21390317	Lindstrom S, Schumacher F, Siddiq A, Travis RC, Campa D, et al. Characterizing associations and SNP-environment interactions for GWAS-identified prostate cancer risk markers--results from BPC3. PLoS One. 2011 Feb 24;6(2):e17142.
TCF2	rs7501939	17q12	1.01x10-6	literature	22459122	Tsilidis KK, Travis RC, Appleby PN, Allen NE, Lindstrom S, Schumacher FR, et al. Interactions between genome-wide significant genetic variants and circulating concentrations of insulin-like growth factor 1, sex hormones, and binding proteins in relation to prostate cancer risk in the National Cancer Institute Breast and Prostate Cancer Cohort Consortium. Am J Epidemiol. 2012 May 1;175(9):926-35.
TCF2	rs7501939	17q12	2e-06	GWASTABLE	21743057	Schumacher FR	2011-07-08	Hum Mol Genet
TCF4	rs28607662	18q21.2	3e-08	GWASTABLE	29892016	Schumacher FR	2018-08-14	Nat Genet
TCF4	rs28607662	18q21.2	5e-06	GWASTABLE	29892016	Schumacher FR	2018-08-14	Nat Genet
TCF7L2	rs7094871	10q25.2	5e-08	GWASTABLE	29892016	Schumacher FR	2018-08-14	Nat Genet
TCF7L2	rs7903146	10q25.3	0.009	literature	23193118	Machiela MJ, Lindstr≈m S, Allen NE, Haiman CA, Albanes D, Barricarte A, et al. Association of type 2 diabetes susceptibility variants with advanced prostate cancer risk in the Breast and Prostate Cancer Cohort Consortium. Am J Epidemiol. 2012 Dec 15;176(12):1121-9.
TERT	rs2242652	5p15.33	2.7x10-24	literature	18708398	Kote-Jarai Z, Easton DF, Stanford JL, Ostrander EA, Schleutker J, Ingles SA, et al. Multiple novel prostate cancer predisposition loci confirmed by an international study: the PRACTICAL Consortium. Cancer Epidemiol Biomarkers Prev. 2008 Aug;17(8):2052-61.
TERT	rs2242652	5p15.33	2.7x10-24	literature	21743467	Kote-Jarai Z, Olama AA, Giles GG, Severi G, Schleutker J, Weischer M, Campa D, et al. Seven prostate cancer susceptibility loci identified by a multi-stage genome-wide association study. Nat Genet. 2011 Jul 10;43(8):785-91.
TERT	rs2242652	5p15.33	3e-24	nggri	18264096	Thomas G, Jacobs KB, Yeager M, Multiple loci identified in a genome-wide association study of prostate cancer. 2008 Mar;40(3):310-5
TERT	rs2242652	5p15.33	3e-24	GWASTABLE	21743467	Kote-Jarai Z	2011-08-22	Nat Genet
TERT	rs2242652	5p15.33	4e-52	GWASTABLE	29892016	Schumacher FR	2018-08-14	Nat Genet
TERT	rs2736098	5p15.33	3x10-10	literature	21160077	Gudmundsson J, Besenbacher S, Sulem P, Gudbjartsson DF, Olafsson I, et al. Genetic correction of PSA values using sequence variants associated with PSA levels. Sci Transl Med. 2010 Dec 15;2(62):62ra92.
TERT	rs37004	5p15.33	9e-13	GWASTABLE	28139693	Hoffmann TJ	2017-01-31	Nat Commun
TERT	rs37004	5p15.33	9e-13	GWASTABLE	28139693	Hoffmann TJ	2017-05-25	Nat Commun
TERT	rs7725218	5p15.33	3e-11	GWASTABLE	25939597	Berndt SI	2015-05-05	Nat Commun
TERT	rs7725218	5p15.33	3e-11	GWASTABLE	25939597	Berndt SI	2016-02-12	Nat Commun
TET2	rs7679673	4q24	1.19x10-2	literature	19767753	Eeles RA, Kote-Jarai Z, Al Olama AA, Giles GG, Guy M, Severi G, Muir K. et al. Identification of seven new prostate cancer susceptibility loci through a genome-wide association study. Nat Genet. 2009 Oct;41(10):1116-21.
TET2	rs7679673	4q24	6.74x10-10	literature	21390317	Lindstrom S, Schumacher F, Siddiq A, Travis RC, Campa D, et al. Characterizing associations and SNP-environment interactions for GWAS-identified prostate cancer risk markers--results from BPC3. PLoS One. 2011 Feb 24;6(2):e17142.
TET2	rs7679673	4q24	9.39x10-3	literature	21756274	Liu F, Hsing AW, Wang X, Shao Q, Qi J, Ye Y, Wang Z, Chen H, Gao X, et al. Systematic confirmation study of reported prostate cancer risk-associated single nucleotide polymorphisms in Chinese men. Cancer Sci. 2011 Oct;102(10):1916-20.
TET2	rs7679673	4q24	2.02x10-4	literature	22459122	Tsilidis KK, Travis RC, Appleby PN, Allen NE, Lindstrom S, Schumacher FR, et al. Interactions between genome-wide significant genetic variants and circulating concentrations of insulin-like growth factor 1, sex hormones, and binding proteins in relation to prostate cancer risk in the National Cancer Institute Breast and Prostate Cancer Cohort Consortium. Am J Epidemiol. 2012 May 1;175(9):926-35.
TET2	rs7679673	4q24	4e-09	GWASTABLE	25939597	Berndt SI	2015-05-05	Nat Commun
TET2	rs7679673	4q24	4e-09	GWASTABLE	25939597	Berndt SI	2016-02-12	Nat Commun
TET2	rs7679673	4q24	5e-08	GWASTABLE	26034056	Hoffmann TJ	2016-07-15	Cancer Discov
TET2	rs7679673	4q24	3e-14	GWASTABLE	19767753	Eeles RA	2009-12-29	Nat Genet
TET2	rs7679673	4q24	1e-49	GWASTABLE	29892016	Schumacher FR	2018-08-14	Nat Genet
TEX11	rs6625711	Xq13.1	6e-07	GWASTABLE	25217961	Al Olama AA	2015-05-07	Nat Genet
TEX11	rs6625711	Xq13.1	6e-12	GWASTABLE	25217961	Al Olama AA	2015-05-07	Nat Genet
TH	rs7126629	11p15.5	2e-08	GWASTABLE	24740154	Lange EM	2014-04-16	PLoS One
TH	rs7126629	11p15.5	2e-08	GWASTABLE	24740154	Lange EM	2014-11-09	PLoS One
TH	rs7127900	11p15.5	3.06x10-1	literature	19767753	Eeles RA, Kote-Jarai Z, Al Olama AA, Giles GG, Guy M, Severi G, Muir K. et al. Identification of seven new prostate cancer susceptibility loci through a genome-wide association study. Nat Genet. 2009 Oct;41(10):1116-21.
TH	rs7127900	11p15.5	5e-68	GWASTABLE	29892016	Schumacher FR	2018-08-14	Nat Genet
TH	rs7127900	11p15.5	1e-07	GWASTABLE	24740154	Lange EM	2014-11-09	PLoS One
THADA	rs1465618	2p21	1.6x10-8	literature	19767753	Eeles RA, Kote-Jarai Z, Al Olama AA, Giles GG, Guy M, Severi G, Muir K, Identification of seven new prostate cancer susceptibility loci through a genome-wide association study. Nat Genet. 2009 Oct;41(10):1116-21.
THADA	rs1465618	2p21	4.92x10-3	literature	20564319	Kim ST, Cheng Y, Hsu FC, Jin T, Kader AK, Zheng SL, Isaacs WB, Xu J, Sun J. Prostate cancer risk-associated variants reported from genome-wide association studies: meta-analysis and their contribution to genetic Variation. Prostate. 2010 Dec 1;70(16):1729-38.
THADA	rs1465618	2p21	1.02x10-5	literature	21390317	Lindstrom S, Schumacher F, Siddiq A, Travis RC, Campa D, et al. Characterizing associations and SNP-environment interactions for GWAS-identified prostate cancer risk markers--results from BPC3. PLoS One. 2011 Feb 24;6(2):e17142.
THADA	rs1465618	2p21	0.02	literature	21756274	Liu F, Hsing AW, Wang X, Shao Q, Qi J, Ye Y, Wang Z, Chen H, Gao X, et al. Systematic confirmation study of reported prostate cancer risk-associated single nucleotide polymorphisms in Chinese men. Cancer Sci. 2011 Oct;102(10):1916-20.
THADA	rs1465618	2p21	2e-08	nggri	18264096	Thomas G, Jacobs KB, Yeager M, Multiple loci identified in a genome-wide association study of prostate cancer. 2008 Mar;40(3):310-5
THADA	rs1465618	2p21	2e-08	GWASTABLE	19767753	Eeles RA	2009-12-29	Nat Genet
THADA	rs1465618	2p21	2e-18	GWASTABLE	29892016	Schumacher FR	2018-08-14	Nat Genet
THADA	rs9567349 x rs1465618	13q14.11 x 2p21	4e-06	GWASTABLE	22219177	Tao S	2012-03-31	Carcinogenesis
THEG5	rs11084596	19q12	1e-15	GWASTABLE	28139693	Hoffmann TJ	2017-01-31	Nat Commun
THEG5	rs11084596	19q12	1e-15	GWASTABLE	28139693	Hoffmann TJ	2017-05-25	Nat Commun
TIMM23	rs10763567	10q11.22	6e-10	GWASTABLE	27262462	Teerlink CC	2016-06-04	Hum Genet
TIMM23	rs10763567	10q11.22	6e-10	GWASTABLE	27262462	Teerlink CC	2017-02-03	Hum Genet
TLR4	rs6478343	9q33.1	2e-08	GWASTABLE	28139693	Hoffmann TJ	2017-01-31	Nat Commun
TLR4	rs6478343	9q33.1	2e-08	GWASTABLE	28139693	Hoffmann TJ	2017-05-25	Nat Commun
TMPRSS2	rs1041449	21q22.3	3e-08	GWASTABLE	25217961	Al Olama AA	2014-09-14	Nat Genet
TMPRSS2	rs1041449	21q22.3	3e-08	GWASTABLE	25217961	Al Olama AA	2015-05-07	Nat Genet
TMPRSS2	rs1041449	21q22.3	3e-07	GWASTABLE	25217961	Al Olama AA	2015-05-07	Nat Genet
TMTC2	rs12317459	12q21.31 x 8q24.21	4e-06	GWASTABLE	22219177	Tao S	2012-01-04	Carcinogenesis
TMTC2	rs12317459 x rs16901979	12q21.31 x 8q24.21	4e-06	GWASTABLE	22219177	Tao S	2012-03-31	Carcinogenesis
TNC	rs7847271	9q33.1 x 3q21.3	4e-06	GWASTABLE	22219177	Tao S	2012-01-04	Carcinogenesis
TNC	rs7847271 x rs10934853	9q33.1 x 3q21.3	4e-06	GWASTABLE	22219177	Tao S	2012-03-31	Carcinogenesis
TNFSF10	rs3774315	3q26	0.002	literature	21467234	FitzGerald LM, Kwon EM, Conomos MP, Kolb S, Holt SK, Levine D, Feng Z, Ostrander EA, Stanford JL. Genome-wide association study identifies a genetic variant associated with risk for more aggressive prostate cancer. Cancer Epidemiol Biomarkers Prev. 2011 Jun;20(6):1196-203.
TNRC6B	rs11704416	22q13.1	4e-06	GWASTABLE	23065704	Amin Al Olama A	2012-10-12	Hum Mol Genet
TNRC6B	rs11704416	22q13.1	4e-06	GWASTABLE	23065704	Amin Al Olama A	2013-01-10	Hum Mol Genet
TNRC6B	rs11704416	22q13.1	4e-07	GWASTABLE	23065704	Amin Al Olama A	2013-01-10	Hum Mol Genet
TNRC6B	rs12628051 x rs7127900	22q13.1 x 11p15.5	3e-06	GWASTABLE	22219177	Tao S	2012-03-31	Carcinogenesis
TNRC6B	rs4821941 x rs7127900	22q13.1 x 11p15.5	4e-06	GWASTABLE	22219177	Tao S	2012-03-31	Carcinogenesis
TNRC6B	rs58133635	22q13.1	5e-12	GWASTABLE	29892016	Schumacher FR	2018-08-14	Nat Genet
TNRC6B	rs7291691	22q13	5.61x10-5	literature	19117981	Sun J, Zheng SL, Wiklund F, Isaacs SD, Li G, Wiley KE. Et al. Sequence variants at 22q13 are associated with prostate cancer risk. Cancer Res. 2009 Jan 1;69(1):10-5.
TNRC6B	rs9623117	22q13	1.22x10-3	literature	20564319	Kim ST, Cheng Y, Hsu FC, Jin T, Kader AK, Zheng SL, Isaacs WB, Xu J, Sun J. Prostate cancer risk-associated variants reported from genome-wide association studies: meta-analysis and their contribution to genetic Variation. Prostate. 2010 Dec 1;70(16):1729-38.
TNRC6B	rs9623117	22q13	5e-07	nggri	18264096	Thomas G, Jacobs KB, Yeager M, Multiple loci identified in a genome-wide association study of prostate cancer. 2008 Mar;40(3):310-5
TNRC6B	rs9623117	22q13.1	5e-07	GWASTABLE	19117981	Sun J	2009-01-01	Cancer Res
TNRC6B	rs9623117	22q13.1	5e-07	GWASTABLE	19117981	Sun J	2009-02-26	Cancer Res
TNRC6B	rs12628051	22q13.1 x 11p15.5	3e-06	GWASTABLE	22219177	Tao S	2012-01-04	Carcinogenesis
TNRC6B	rs4821941	22q13.1 x 11p15.5	4e-06	GWASTABLE	22219177	Tao S	2012-01-04	Carcinogenesis
TNS3	rs56232506	7p12.3	9e-09	GWASTABLE	25217961	Al Olama AA	2014-09-14	Nat Genet
TNS3	rs56232506	7p12.3	9e-09	GWASTABLE	25217961	Al Olama AA	2015-05-07	Nat Genet
TNS3	rs56232506	7p12.3	2e-09	GWASTABLE	25217961	Al Olama AA	2015-05-07	Nat Genet
TNS3	rs56232506	7p12.3	1e-11	GWASTABLE	29892016	Schumacher FR	2018-08-14	Nat Genet
TOR1A	rs1182	9q34.11	1e-09	GWASTABLE	29892016	Schumacher FR	2018-08-14	Nat Genet
TOR1A	rs1182	9q34.11	1e-07	GWASTABLE	29892016	Schumacher FR	2018-08-14	Nat Genet
TRIM31	rs115457135	6p22.1	1e-07	GWASTABLE	25217961	Al Olama AA	2014-09-14	Nat Genet
TRIM31	rs115457135	6p22.1	1e-07	GWASTABLE	25217961	Al Olama AA	2015-05-07	Nat Genet
TRIM31	rs115457135	6p22.1	2e-08	GWASTABLE	25217961	Al Olama AA	2015-05-07	Nat Genet
TRIM31	rs7767188	6p22.1	2e-08	GWASTABLE	29892016	Schumacher FR	2018-08-14	Nat Genet
TRIM8	rs3850699	10q24.3	4.87x10-10	literature	23535732	Eeles RA, Olama AA, Benlloch S, Saunders EJ, Leongamornlert DA, Tymrakiewicz M, et al. Identification of 23 new prostate cancer susceptibility loci using the iCOGS custom genotyping array. Nat Genet. 2013 Apr;45(4):385-91.
TRIM8	rs3850699	10q24.32	6e-16	GWASTABLE	29892016	Schumacher FR	2018-08-14	Nat Genet
TSEN2	rs6766510	3p25.2 x 10q11.22	2e-06	GWASTABLE	22219177	Tao S	2012-01-04	Carcinogenesis
TSEN2	rs6766510 x rs10993994	3p25.2 x 10q11.22	2e-06	GWASTABLE	22219177	Tao S	2012-03-31	Carcinogenesis
TSHZ1	rs10460109	18q22.3	4e-08	GWASTABLE	29892016	Schumacher FR	2018-08-14	Nat Genet
TTC28	rs9625483	22q12.1	2e-08	GWASTABLE	29892016	Schumacher FR	2018-08-14	Nat Genet
TTC7A	rs10194115	2p16.3	5e-07	erdisfanct/nggri	20932654	Kerns SL, Ostrer H, Stock R, Genome-wide association study to identify single nucleotide polymorphisms (SNPs) associated with the development of erectile dysfunction in African-American men after radiotherapy for prostate cancer. 2010 Dec 1;78(5):1292-300.
TTC9	rs8014671	14q24.2	3e-07	GWASTABLE	25217961	Al Olama AA	2014-09-14	Nat Genet
TTC9	rs8014671	14q24.2	3e-07	GWASTABLE	25217961	Al Olama AA	2015-05-07	Nat Genet
TTC9	rs8014671	14q24.2	1e-08	GWASTABLE	25217961	Al Olama AA	2015-05-07	Nat Genet
TTLL1	rs5759167	22q13.1	3.01x10-3	literature	19767753	Eeles RA, Kote-Jarai Z, Al Olama AA, Giles GG, Guy M, Severi G, Muir K. et al. Identification of seven new prostate cancer susceptibility loci through a genome-wide association study. Nat Genet. 2009 Oct;41(10):1116-21.
TUBA1	rs10875943	2q36.1	0.002	literature	21743467	Kote-Jarai Z, Olama AA, Giles GG, Severi G, Schleutker J, Weischer M, Campa D, et al. Seven prostate cancer susceptibility loci identified by a multi-stage genome-wide association study. Nat Genet. 2011 Jul 10;43(8):785-91.
TUBA1C	rs10875943	12q13.12	7e-12	GWASTABLE	21743467	Kote-Jarai Z	2011-08-22	Nat Genet
TUBA1C	rs10875943	12q13.12	2e-15	GWASTABLE	29892016	Schumacher FR	2018-08-14	Nat Genet
TUBA1C	rs10875943	12q13.12	2e-06	GWASTABLE	26034056	Hoffmann TJ	2016-07-15	Cancer Discov
TUBA1C	rs10875943	12q13.12	7e-08	GWASTABLE	26034056	Hoffmann TJ	2016-07-15	Cancer Discov
TUBGCP3	rs7325069	13q34	3e-06	GWASTABLE	29356057	Du Z	2018-07-03	Prostate
TXLNG	rs5969745	Xp22.2	3e-13	GWASTABLE	28139693	Hoffmann TJ	2017-01-31	Nat Commun
TXLNG	rs5969745	Xp22.2	3e-13	GWASTABLE	28139693	Hoffmann TJ	2017-05-25	Nat Commun
UHRF1BP1	rs9469899	6p21.31	5e-09	GWASTABLE	29892016	Schumacher FR	2018-08-14	Nat Genet
UHRF1BP1	rs9469899	6p21.31	2e-06	GWASTABLE	29892016	Schumacher FR	2018-08-14	Nat Genet
UPF2	rs10795917 x rs8102476	10p14 x 19q13.2	7e-07	GWASTABLE	22219177	Tao S	2012-03-31	Carcinogenesis
UPF2 x NR	rs10795917 x rs8102476	10p14 x 19q13.2	7e-07	GWASTABLE	22219177	Tao S	2012-01-04	Carcinogenesis
VAMP8	RS10187424	2p12-p11.2	0.003	literature	21743467	Kote-Jarai Z, Olama AA, Giles GG, Severi G, Schleutker J, Weischer M, Campa D, et al. Seven prostate cancer susceptibility loci identified by a multi-stage genome-wide association study. Nat Genet. 2011 Jul 10;43(8):785-91.
VAMP8	rs3731827	2p11.2	1e-09	GWASTABLE	26034056	Hoffmann TJ	2016-07-15	Cancer Discov
VDR	rs731236	12q12-q14	0.04	literature	21358824	Bonilla C, Hooker S, Mason T, Bock CH, Kittles RA. Prostate cancer susceptibility Loci identified on chromosome 12 in African Americans. PLoS One. 2011 Feb 16;6(2):e16044.
VDR	rs7975128	12q12-q14	0.02	literature	21358824	Bonilla C, Hooker S, Mason T, Bock CH, Kittles RA. Prostate cancer susceptibility Loci identified on chromosome 12 in African Americans. PLoS One. 2011 Feb 16;6(2):e16044.
VEGFA	rs6920449	6p21.1	6e-12	GWASTABLE	28139693	Hoffmann TJ	2017-01-31	Nat Commun
VEGFA	rs6920449	6p21.1	6e-12	GWASTABLE	28139693	Hoffmann TJ	2017-05-25	Nat Commun
VGLL3	rs2660753	3p12.1	6e-06	GWASTABLE	26443449	Wang M	2015-10-07	Nat Commun
VGLL3	rs2660753	3p12.1	6e-06	GWASTABLE	26443449	Wang M	2016-06-13	Nat Commun
VGLL3	rs9757252 x rs17021918	3p12.1 x 4q22.3	5e-06	GWASTABLE	22219177	Tao S	2012-03-31	Carcinogenesis
VGLL3	rs9757252 x rs17021918	3p12.1 x 4q22.3	5e-06	GWASTABLE	22219177	Tao S	2012-01-04	Carcinogenesis
VPS53	rs684232	17p13.3	5e-15	GWASTABLE	23535732	Eeles RA	2013-09-16	Nat Genet
VPS53	rs684232	17p13.3	4e-24	GWASTABLE	29892016	Schumacher FR	2018-08-14	Nat Genet
WDR11	rs10749415	10q26.13	9e-25	GWASTABLE	28139693	Hoffmann TJ	2017-01-31	Nat Commun
WDR11	rs10749415	10q26.13	9e-25	GWASTABLE	28139693	Hoffmann TJ	2017-05-25	Nat Commun
WDR11	rs200367988	10q26.12	5e-18	GWASTABLE	28139693	Hoffmann TJ	2017-01-31	Nat Commun
WDR11	rs200367988	10q26.12	5e-18	GWASTABLE	28139693	Hoffmann TJ	2017-05-25	Nat Commun
WDR52	rs7611694		4e-13	GWASTABLE	23535732	Eeles RA	2013-04-01	Nat Genet
WDR52	rs7611694		4e-13	GWASTABLE	23535732	Eeles RA	2013-09-16	Nat Genet
WWOX	rs11150069	16q23.3-q24.1	9.43x10-6	literature	21467234	FitzGerald LM, Kwon EM, Conomos MP, Kolb S, Holt SK, Levine D, Feng Z, Ostrander EA, Stanford JL. Genome-wide association study identifies a genetic variant associated with risk for more aggressive prostate cancer. Cancer Epidemiol Biomarkers Prev. 2011 Jun;20(6):1196-203.
XAGE3	rs2807031	Xp11.22	3e-11	GWASTABLE	25217961	Al Olama AA	2014-09-14	Nat Genet
XAGE3	rs2807031	Xp11.22	4e-06	GWASTABLE	25939597	Berndt SI	2016-02-12	Nat Commun
XAGE3	rs2807031	Xp11.22	3e-11	GWASTABLE	25217961	Al Olama AA	2015-05-07	Nat Genet
XAGE3	rs2807031	Xp11.22	9e-10	GWASTABLE	25217961	Al Olama AA	2015-05-07	Nat Genet
XAGE3	rs2807031	Xp11.22	8e-16	GWASTABLE	29892016	Schumacher FR	2018-08-14	Nat Genet
XYLT1	rs12918539	16p12	7.38x104	literature	21960693	Feng J, Sun J, Kim ST, Lu Y, Wang Z, Zhang Z, Gronberg H, Isaacs WB, Zheng SL, Xu J. A genome-wide survey over the ChIP-on-chip identified androgen receptor-binding genomic regions identifies a novel prostate cancer susceptibility locus at 12q13.13. Cancer Epidemiol Biomarkers Prev. 2011 Nov;20(11):2396-403.
ZBTB38	rs1991431	3q23	3e-11	GWASTABLE	28139693	Hoffmann TJ	2017-01-31	Nat Commun
ZBTB38	rs1991431	3q23	3e-11	GWASTABLE	28139693	Hoffmann TJ	2017-05-25	Nat Commun
ZBTB38	rs6763931	3q23	2.0x10-8	literature	18708398	Kote-Jarai Z, Easton DF, Stanford JL, Ostrander EA, Schleutker J, Ingles SA, et al. Multiple novel prostate cancer predisposition loci confirmed by an international study: the PRACTICAL Consortium. Cancer Epidemiol Biomarkers Prev. 2008 Aug;17(8):2052-61.
ZBTB38	rs6763931	3q23	2e-08	nggri	17401363	Yeager M, Orr N, Hayes RB, Genome-wide association study of prostate cancer identifies a second risk locus at 8q24. 2007 May;39(5):645-9
ZBTB38	rs6763931	3q23	2e-08	GWASTABLE	21743467	Kote-Jarai Z	2011-07-10	Nat Genet
ZBTB38	rs6763931	3q23	2e-08	GWASTABLE	21743467	Kote-Jarai Z	2011-08-22	Nat Genet
ZBTB38	rs6763931	3q23	7e-08	GWASTABLE	29892016	Schumacher FR	2018-08-14	Nat Genet
ZGPAT	rs6062509	20q13.3	3.57x10-16	literature	23535732	Eeles RA, Olama AA, Benlloch S, Saunders EJ, Leongamornlert DA, Tymrakiewicz M, et al. Identification of 23 new prostate cancer susceptibility loci using the iCOGS custom genotyping array. Nat Genet. 2013 Apr;45(4):385-91.
ZGPAT	rs6062509	20q13.33	4e-16	GWASTABLE	23535732	Eeles RA	2013-09-16	Nat Genet
ZGPAT	rs6062509	20q13.33	3e-18	GWASTABLE	29892016	Schumacher FR	2018-08-14	Nat Genet
ZNF280B	rs5751168 x rs7679673	22q11.22 x 4q24	4e-06	GWASTABLE	22219177	Tao S	2012-03-31	Carcinogenesis
ZNF280B x TET2	rs5751168 x rs7679673	22q11.22 x 4q24	4e-06	GWASTABLE	22219177	Tao S	2012-01-04	Carcinogenesis
ZNF285	rs2571082	19q13.31	7e-06	GWASTABLE	29356057	Du Z	2018-07-03	Prostate
ZNF652	rs7210100	17q21.32	3.4x10-13	literature	21637779	Haiman CA, Chen GK, Blot WJ, Strom SS, Berndt SI, Kittles RA. Et al. Characterizing genetic risk at known prostate cancer susceptibility loci in African Americans. PLoS Genet. 2011 May;7(5):e1001387.
ZNF652	rs7210100	17q21.32	3e-13	nggri	17401363	Yeager M, Orr N, Hayes RB, Genome-wide association study of prostate cancer identifies a second risk locus at 8q24. 2007 May;39(5):645-9
ZNF652	rs7210100	17q21.33	3e-13	GWASTABLE	21602798	Haiman CA	2011-05-22	Nat Genet
ZNF652	rs7210100	17q21.33	3e-13	GWASTABLE	21602798	Haiman CA	2011-06-03	Nat Genet
ZNF827	rs13149290	4q31.22	2.56x10-5	literature	18073375	Duggan D, Zheng SL, Knowlton M, Benitez D, Dimitrov L, Wiklund F, Robbins C. et al. Two genome-wide association studies of aggressive prostate cancer implicate putative prostate tumor suppressor gene DAB2IP. J Natl Cancer Inst. 2007 Dec 19;99(24):1836-44.
ZNF827	rs56935123	4q31.22	4e-09	GWASTABLE	28139693	Hoffmann TJ	2017-01-31	Nat Commun
ZNF827	rs56935123	4q31.22	4e-09	GWASTABLE	28139693	Hoffmann TJ	2017-05-25	Nat Commun
