# Supplementary material for: Mapping the Germline and Somatic Mutation Interaction Landscape in Indolent and Aggressive Prostate Cancers
Source: J Oncol. 2019 Nov 13;2019:4168784. doi: 10.1155/2019/4168784 (PMC6878815; doi:10.1155/2019/4168784)
Supplement: Supplementary Materials — Supplementary Table SA: a comprehensive list of single-nucleotide polymorphisms (herein called genetic variants) and genes associated with increased risk of developing prostate cancer and published GWAS reports denoted by the PubMed ID and actual reference from which the data were extracted. Supplementary Table S1A: a complete list of somatic mutated genes found to be significantly differentially expressed in indolent (sheet-1) and aggressive (sheet-2) tumors matched with controls. Supplementary Table S1B: a complete list of nonsomatic mutated genes found to be significantly differentially expressed in indolent (sheet-1) and aggressive (sheet-2) tumors matched with controls. Supplementary Table S2: a comprehensive list of somatic mutated genes in indolent (sheet-1) and aggressive (sheet-2) PCa obtained from TCGA. Supplementary Table S2A: a complete list of somatic mutated genes found to be significantly differentially expressed in only indolent PCa, only aggressive PCa, and both tumors. Supplementary Table S1: a complete list of significantly differentially expressed somatic mutated genes distinguishing patients with indolent PCa from patients with aggressive PCa. Supplementary Table S3A: a complete list of germline mutated genes significantly associated with indolent PCa. Supplementary Table S3B: a complete list of germline mutated genes significantly associated with aggressive PCa. Supplementary Table ISN4: molecular networks enriched with germline and somatic mutations in indolent PCa. Supplementary Table ISN5: molecular networks enriched with germline and somatic mutations in aggressive PCa. [file 4168784.f1.zip › 4168784.f1/TABLE-1SN5-AGGRESSIVE-NETWORKS-IPA (1).txt]

Table ISN5. Molecular networks enriched for germline and somatic mutations in aggressive PCa.                                
Rank        Molecules in Network        Z-Score        Number of genes mapped to the network        Top Diseases and Functions
1        "ACTC1,ATF7IP,ATPase,BYSL,DACT1,DNMT3A,DNMT3B,EFCAB7,GSTM2,HP1,HP1BP3,IPO8,IRS,Jnk,KIF13A,KIF5A,KLHL2,LONRF1,PAK6,PEG3,PEX6,PLCB4,PLEKHA6,Rab11,RHOBTB3,ROBO4,SLIT3,TOR1A,TRIM28,TRIM9,tyrosine kinase,VPS35,ZNF516,ZNF518A,ZNF750"        49        29        "[Infectious Diseases, DNA Replication, Recombination, and Repair, Gene Expression]"
2        "14-3-3,ABCC9,CEP85L,CLASRP,CLK2,Collagen Alpha1,FAM208B,GTF2E2,Holo RNA polymerase II,HOOK2,Importin alpha,KCNQ1,LARP1,mediator,MTG2,MTREX,P-TEFb,PDLIM5,PDS5B,Pka,RNA polymerase II,Rnr,RPRD2,SDHC,SNX4,Srp30,SRSF1,SRSF2,SSRP1,SUPT5H,TAF15,TARBP1,TRIP12,ZFC3H1,ZNF638"        39        25        "[Cardiac Arrythmia, Cardiovascular Disease, Hereditary Disorder]"
3        "ADNP,Cdc2,CDC20,Cdk,CDK13,CDKN1B,CDYL,Cyclin A,Cyclin E,DDIT4,E2f,EPB41L5,FAM111B,Histone H1,IL-2R,Inflammasome (Nalp3, Asc, Casp1),KIF26B,KLHL20,MAML3,MDM4,MIIP,NEDD9,NPAT,OSBPL3,PI3K (complex),PP1 protein complex group,Rb,RBL2,RFX6,SAMD9,thymidine kinase,TRIM33,TXNIP,UHRF1BP1,ZBTB44"        35        23        "[Cell Cycle, Embryonic Development, Cancer]"
4        "Ap1,ATP6V1A,BMPR1A,CA2,CASC1,Cbp/p300,ELF4,EZH1,FAM83F,Hdac,Hif1,HNF1B,JPH2,JUP,LARP4B,MIR17-92,MME,MYO9A,MYSM1,NR2F2,OTUD4,PI3K p85,PKD1,PKNOX2,Secretase gamma,SLC19A2,Smad,Smad1/5/8,Smad2/3,SMAD4,SMAD9,SMOC1,TCF,TCF4,Vegf"        35        23        "[Embryonic Development, Organismal Development, Skeletal and Muscular System Development and Function]"
5        "ACACA,AMPK,ATP5F1A,BETA TUBULIN,caspase,CILP,Ck2,CYC1,Cytochrome bc1,cytochrome C,ENO1,GOLGB1,Gsk3,GUCY2C,INHBA,Insulin,KLHL4,Lh,MAOA,MTMR7,NAV3,Nos,NPHP4,NUDT12,NUP205,Oxphos,PARP,phosphatase,PPFIA2,PPFIA3,PPFIBP1,PRKAA,SNCAIP,TELO2,THTPA"        30        21        "[Cancer, Gastrointestinal Disease, Hepatic System Disease]"
6        "2-oxoglutarate:oxygen oxidoreductase,ACAC,ACACB,AKAP8L,Akt,ALKBH1,ANKRD28,ANKRD52,BRWD3,C19orf57,CDK4/6,Coup-Tf,Ctbp,DCLRE1C,DNA-methyltransferase,Fascin,FTO,HCFC2,HDAC3,histone deacetylase,histone-lysine N-methyltransferase,KDM4C,KMT2A,MECOM,N-Cadherin,N-cor,PHIP,Pias,PRDM16,RUNX1T1,SHKBP1,Srebp,SUMO-Ubc9 E2,TBC1D2,TBX1"        28        20        "[RNA Damage and Repair, RNA Post-Transcriptional Modification, Cellular Development]"
7        "ANKH,Ap2,B-cell receptor,BNC1,elastase,Fc gamma receptor,GLI2,GLI3,growth factor,HLA-DR,I kappa b kinase,IFN alpha/beta,Ikb,IL-1R,IL1RAPL1,IRX4,MAP3K,MAST2,MFHAS1,MTORC2,NFkB (complex),NFkB (family),PASK,Pka catalytic subunit,PRKD2,RHBDD1,ST3GAL1,STK36,SYK/ZAP,TBX5,TGFBR3,THSD4,TRIM62,TRPC4,ZBTB32"        26        19        "[Developmental Disorder, Respiratory Disease, Digestive System Development and Function]"
8        "ACTG1,Actin,Alpha actin,Alpha catenin,Androgen-ARA55-AR-ARA70-HSP40-HSP70-HSP90,CDH24,Erm,F Actin,Fgf,FGF10,HDAC6,Hedgehog,KCTD10,KLF4,KLK2,LDL-cholesterol,MKS1,MYL6,NCOA4,P38 MAPK,PFKP,Rock,SIX1,SV2A,SWI-SNF,T3-TR-RXR,TBX3,TGFB1I1,TJP2,Tropomyosin,TTC7A,tubulin (family),VitaminD3-VDR-RXR,WIF1,Wnt"        24        18        "[Nervous System Development and Function, Neurological Disease, Embryonic Development]"
9        "ADAMTS10,Adaptor protein 2,ADCY,ADCY2,ADGRG1,ADRA1A,ADRA1D,Alpha tubulin,AR,BBS9,Calmodulin,CCT4,CG,CUL2,DEPDC1,E3 RING,ECE2,EGLN,Focal adhesion kinase,FZD4,G protein alphai,Gpcr,GPR143,KCNN3,Metalloprotease,MTORC1,Pik3r,Proinsulin,SACS,Sfk,STAT,TMPRSS2,TTLL3,tubulin,VHL"        24        18        "[Cancer, Neurological Disease, Organismal Injury and Abnormalities]"
10        "ACE,ALOX15,Alpha Actinin,Caspase 3/7,Collagen type I,Collagen type II,Collagen type III,Collagen type IV,Collagen(s),Cpla2,ESYT2,Fibrinogen,G-Actin,GPIIB-IIIA,GRHL3,Growth hormone,HDL,HDL-cholesterol,Laminin (complex),LDL,MAD1L1,MIA3,MLPH,MSR1,NBEAL2,Nr1h,PEX2,Pkc(s),PLD1,SELP,SI,SMPD2,SOX6,SUCO,TLN1"        22        17        "[Cell-To-Cell Signaling and Interaction, Organismal Development, Organismal Functions]"
11        "BCOR,CD83,CMIP,CS,DOCK11,DUB,ERBB4,GMIP,GTPase,HSP,Ifn,Ifn gamma,Iga,IL12 (complex),LCN2,LDLR,LTBR,MHC Class II (complex),MYO9B,Nfat (family),P110,Pro-inflammatory Cytokine,PTK,Ras homolog,Sod,TCR,Tlr,TLR4,Tnf (family),Tnf receptor,USP12,USP31,USP34,USP45,ZAP70"        22        17        "[Cardiovascular Disease, Organismal Injury and Abnormalities, Renal Damage]"
12        "ACTA1,ADRB,APC/APC2,cacn,Cacna1,CACNA1C,CACNA1D,CACNB4,calpain,CaMKII,CNTN2,Creb,EPB41L3,estrogen receptor,FAM214A,FSH,GRIN3A,KANK1,L-type Calcium Channel,Ldh (complex),Mapk,MN1,MSMB,MUC15,Mucin,NMDA Receptor,NOS1,PCDH10,PP2A,Ppp2c,PTPase,Rsk,SETBP1,UPF2,voltage-gated calcium channel"        21        16        "[Cardiac Arteriopathy, Cardiovascular Disease, Organismal Injury and Abnormalities]"
13        "Alp,ARSB,ATF2,C1S,COMP,cytokine,FAS,FCGBP,GOT,hemoglobin,Hsp70,Hsp90,Ige,IgG,IgG1,Igm,IKK (complex),IL1,IL12 (family),Immunoglobulin,Interferon alpha,LRRN2,Mmp,MMP26,MMP9,PGBD1,POLQ,SRC (family),Tgf beta,TMEM71,TRAF2,TRIM31,trypsin,VEGFA,ZNF146"        21        16        "[Cell Death and Survival, Organismal Injury and Abnormalities, Connective Tissue Development and Function]"
14        "ADRA1,Androgen-AR,B3GAT1,CD63,collagen,cytokine receptor,Eph Receptor,EPHA10,EPHB1,ERK1/2,FERMT2,Fibrin,Filamin,growth factor receptor,Integrin,Integrin alpha 3 beta 1,Integrin alpha 4 beta 1,Integrinα,ITGA10,ITGA6,LAMA3,Laminin (family),Laminin1,NCK,phosphatidylinositol-4,5-bisphosphate 3-kinase,PI4KA,PIK3CB,PIK3CD,Pki,Rab5,SCN5A,Talin,TFAP2E,TNS1,TSPAN7"        19        15        "[Carbohydrate Metabolism, Lipid Metabolism, Small Molecule Biochemistry]"
15        "AKAP6,ATP2B4,BCR (complex),Calcineurin A,Calcineurin protein(s),CK1,COL6A1,EIF2S3,ERCC2,ERK,Fcer1,GAB2,GAPVD1,GLDC,IgG2a,IgG2b,Igg3,INPP5D,JAK,JAK1/2,JINK1/2,MAP2K1/2,NFAT (complex),Oas,Pak,Pde,PLC gamma,PSD,RAG1,RNASEL,RXYLT1,TEC/BTK/ITK/TXK/BMX,TFIIH,VAV,VAV1"        17        14        "[Hematological System Development and Function, Immunological Disease, Lymphoid Tissue Structure and Development]"
16        "AGPS,ATP11B,CD3,DSCC1,EXOC4,FARP2,G-protein beta,Hsp27,IFIT2,IFN Beta,IFN type 1,Ifnar,IL4R,IL6ST,IRS1,JAK1,Mek,NADPH oxidase,p70 S6k,p85 (pik3r),Pdgf (complex),PDGF BB,PI3K (family),PTGS1,Rac,Rap1,RAS,Sapk,SEMA3E,Shc,Sos,STAT5a/b,TRIOBP,TSH,ZNF281"        17        14        "[Lipid Metabolism, Small Molecule Biochemistry, Connective Tissue Disorders]"
17        "ALLC,BAZ2B,CENPS/CENPS-CORT,CHMP4B,CTCF,ESR1,FAM111A,FANCB,G3BP2,INSYN2,KIAA1211,LINC-ROR,mir-140,miR-515-5p (and other miRNAs w/seed UCUCCAA),Mta,NR1D2,NYNRIN,PCDHA1,PCDHA11,PCDHA4,PCDHGA9,PCDHGB2,PEBP4,PRDM2,PTCH2,PTCHD4,PTTG1IP,RNF38,TMSB15A,TOP3A,TP53,TP53I11,TSKU,TTLL11,UBL3"        15        13        "[Cell Death and Survival, Cell Morphology, Hematological Disease]"
18        "ADGRA3,ADGRF3,AHR,ANKS3,ARHGEF39,CAMTA1,CASC4,CLN6,complement receptor,CPNE3,DERL1,DVL2,EVC,FRAS1,LYN,miR-124-3p (and other miRNAs w/seed AAGGCAC),P2RY11,PAQR4,PIK3CA,PLA2G12A,PTTG1IP,RBM47,RNPEPL1,SHLD2,SLC30A9,SLC52A2,SLITRK4,SMO,SYPL1,TRIM25,TSEN2,TTC7A,VARS2,YIF1B,ZCCHC24"        15        13        "[Neurological Disease, Organismal Injury and Abnormalities, Skeletal and Muscular Disorders]"
19        "26s Proteasome,AADAT,AHSP,ATF7IP2,BRCA1,BRDT,DDX59,DNAJC17,E1,GCC1,HIST1H2BG,HISTONE,Histone h3,Histone h4,HSP90AA1,KLHL15,KLHL25,LRGUK,miR-9-3p (and other miRNAs w/seed UAAAGCU),Msx3,NKAPL,Nlrp4a,polyubiquitin,PRRT4,PSG5,RNU7-1,SHANK2,SP1,SUGT1,TARS2,TBX15,Ubiquitin,WFS1,WWOX,ZRANB1"        14        12        "[Cell Cycle, Cellular Assembly and Organization, Cellular Function and Maintenance]"
20        "Adducin,APP,ARHGAP15,ARHGAP24,ARHGAP9,CCDC28B,CCZ1/CCZ1B,CD40LG,COMMD7,dehydroascorbic acid,DZIP1L,FYCO1,GMPPB,GSDMB,IFT81,IKBKB,LAD1,LMCD1,MCTP2,PHF20L1,PLEKHG2,PRPF40B,RAC1,Rho-GTP,RNPC3,ROCK1,SHROOM2,SNRNP35,SNX31,TENM1,TNFAIP8L1,TRIM40,UBR3,Wave,ZNF230"        14        12        "[Inflammatory Disease, Organismal Injury and Abnormalities, Respiratory Disease]"
21        "ADCYAP1,APP,ARSE,B4GALNT4,Col17a1,COL19A1,COL21A1,COL22A1,COL23A1,COL25A1,COL26A1,COL28A1,Col6a4,COL6A5,COL6A6,collagen,CPAMD8,Csl,E130116L18Rik,FAM71F2,FGFR2,FMN2,FRMPD2,glutathione,HECW1,IL10,MAPT,MYL10,RAB2B,SUN5,TNK2,TRAM2,TTBK2,ZBTB34,ZNF366"        14        12        "[Cancer, Connective Tissue Disorders, Organismal Injury and Abnormalities]"
22        "AADAC,ADAMTS15,AIFM2,CBLN1,CDS2,CENPP,CHST1,CPD,Ear2 (includes others),EBF2,FANCD2,Hmgn2 (includes others),LMNA,LRMP,LRP4,MYC,MYCT1,NDST2,NRXN3,NSMCE2,NUP188,PPARA,RAB5C,Ranbp2,RFX4,Rpl32,SARDH,SPEG,SUMO1,TMEM201,TMEM64,TTC17,UHRF1BP1L,URB2,ZBTB38"        14        12        "[Cell Cycle, Cellular Development, Connective Tissue Development and Function]"
23        "ADGRG2,ATP13A3,beta-estradiol,BICD1,BRS3,CKAP2L,DHX38,DIRC2,DOP1B,EGFR,GPER1,GPR137B,GPR139,GPR149,GPR173,GPR88,GPR89A/GPR89B,HCRTR1,HCRTR2,HRH4,HTR5A,Htr5b,LPAR3,MAS1,MGARP,PAQR8,PDP1,PTGER2,SLC44A5,SLC52A1,SLC52A2,SSTR4,SUGP2,TACR3,UPK1A"        11        10        "[Cell-To-Cell Signaling and Interaction, Behavior, Neurological Disease]"
24        "ARFGEF3,CGNL1,CLVS2,DDIT3,ESRRB,FKBP11,fluoride,FOS,HIST3H2A,ITM2A,KIAA1551,KRAS,MDM2,miR-542-3p (miRNAs w/seed GUGACAG),NEFM,OCIAD2,OTUB1,PGAM2,PKDREJ,PTH,QPCTL,RFX7,RNF2,SLC4A10,SNAPC5,SNX16,SUMO-Ubc9 E2,TBCA,TDRKH,TEDC1,THEM6,UTS2,YY2,ZC3HAV1L,ZNF827"        11        10        "[Connective Tissue Development and Function, Organ Morphology, Organismal Development]"
25        "A4GALT,ADM,ANGPTL2,ANXA9,C16orf89,COL12A1,COL16A1,COMP,enterolactone,ESR2,EVX1,FFAR2,GPR119,IL17B,IL1B,IL26,KCNH8,LIF,LILRA2,Mcpt1,MMP26,PCYOX1,PI3,PPARD,PTGIS,SCUBE1,SLC10A2,SLC22A3,SORD,spermidine,TIGD3,Tlr12,TMEM176A,TMEM176B,VGLL3"        8        8        "[Embryonic Development, Organismal Development, Reproductive System Development and Function]"
