# Supplementary material for: Mapping the Germline and Somatic Mutation Interaction Landscape in Indolent and Aggressive Prostate Cancers
Source: J Oncol. 2019 Nov 13;2019:4168784. doi: 10.1155/2019/4168784 (PMC6878815; doi:10.1155/2019/4168784)
Supplement: Supplementary Materials — Supplementary Table SA: a comprehensive list of single-nucleotide polymorphisms (herein called genetic variants) and genes associated with increased risk of developing prostate cancer and published GWAS reports denoted by the PubMed ID and actual reference from which the data were extracted. Supplementary Table S1A: a complete list of somatic mutated genes found to be significantly differentially expressed in indolent (sheet-1) and aggressive (sheet-2) tumors matched with controls. Supplementary Table S1B: a complete list of nonsomatic mutated genes found to be significantly differentially expressed in indolent (sheet-1) and aggressive (sheet-2) tumors matched with controls. Supplementary Table S2: a comprehensive list of somatic mutated genes in indolent (sheet-1) and aggressive (sheet-2) PCa obtained from TCGA. Supplementary Table S2A: a complete list of somatic mutated genes found to be significantly differentially expressed in only indolent PCa, only aggressive PCa, and both tumors. Supplementary Table S1: a complete list of significantly differentially expressed somatic mutated genes distinguishing patients with indolent PCa from patients with aggressive PCa. Supplementary Table S3A: a complete list of germline mutated genes significantly associated with indolent PCa. Supplementary Table S3B: a complete list of germline mutated genes significantly associated with aggressive PCa. Supplementary Table ISN4: molecular networks enriched with germline and somatic mutations in indolent PCa. Supplementary Table ISN5: molecular networks enriched with germline and somatic mutations in aggressive PCa. [file 4168784.f1.zip › 4168784.f1/TABLE-ISN4-INDOLENT-NETWORKS-IPA.txt]

Table ISN4 Predicted molecular networks enriched for germline and somatic mutations in indolent PCa
Rank	Molecules in Network	Z-Score	Number of Genes Mapped to the network	Top Diseases and Functions
1	AHCYL1,AMPK,ARID1A,ARNT2,ASPA,ASXL1,CDH3,E2f,FAM13C,Fibrinogen,GATA6,GPCPD1,HISTONE,KCNQ1,MAD1L1,MBOAT7,MED1,MEIS2,MTUS2,NOVA1,Nr1h,PARP,PARP6,PDLIM5,PGR,Pkc(s),POM121/POM121C,RPE65,SELENBP1,SIK3,SLC5A3,ST8SIA5,TGM1,USP22,ZBTB38	51	28	[Organismal Survival, Visual System Development and Function, Nervous System Development and Function]
2	ADAM2,ADAM9,ADAMTS12,ADCY1,ADNP,AKR1C3,ALDH1A2,ALDH1A3,B3GAT1,CDYL,Collagen type IV,creatine kinase,DYSF,ERK1/2,FERMT2,FLRT2,FTO,ITGA6,ITGB6,Laminin (complex),Laminin1,MYOM1,NFATC4,PAPPA,PROS1,Rab11,Rab5,retinal dehydrogenase,SLC12A4,Smad1/5/8,Sos,TPCN1,TRPC6,UHRF1BP1,ZHX1	43	25	[Visual System Development and Function, Embryonic Development, Organismal Development]
3	Akt,Alpha catenin,APBA1,ATP7B,BACE2,CACHD1,CNTNAP1,Ctbp,CTDSPL,DAG1,DSG2,DTNA,F Actin,Fcer1,FYCO1,MAP4,METTL3,MLPH,MUC4,NCAPD3,NES,Neurexin,NRP2,PI3K p85,RNASEL,ROBO2,Secretase gamma,SHCBP1,SLC6A11,Slit,SLIT1,SLIT2,SPTB,ST8SIA4,TEC/BTK/ITK/TXK/BMX	43	25	[Cellular Movement, Nervous System Development and Function, Cell Morphology]
4	CGREF1,CYP24A1,DHX30,DMBT1,ECM2,elastase,FGF10,GLI2,Hdac,Hedgehog,histone deacetylase,HIVEP3,IKBIP,IL1RL2,IRX4,KLK2,LTF,MECOM,MN1,N-cor,NCKAP1,NFkB (complex),NR2F2,PAX9,PKHD1,RC3H2,Rxr,SFRP2,SIX1,SOX9,TBX1,TBX5,TCF,TIP60,Wnt	43	25	[Skeletal and Muscular System Development and Function, Embryonic Development, Organismal Development]
5	26s Proteasome,ACTC1,Actin,Alpha tubulin,AMFR,APBB1,ATL2,Ck2,COPA,DPYSL3,FEN1,Gsk3,HERC2,Histone h4,Insulin,KDM1A,KIF11,LMO7,LRRK2,MAPKBP1,P-TEFb,Proinsulin,RAI14,RNA polymerase II,Rnr,TAGLN2,TCF4,TEDC2,TMEM92,TUBG1,Ubiquitin,UIMC1,UNK,VPS53,WWOX	38	23	[DNA Replication, Recombination, and Repair, Cancer, Hematological Disease]
6	ADCY10,CARD11,CEP152,COL10A1,COL23A1,COL7A1,COL9A1,collagen,Collagen type I,Collagen type X,ERK,Growth hormone,Hsp27,JINK1/2,KIAA1211,KLHL15,LOXL1,Pkg,PP2A,Ppp2c,PPP2R2B,Raf,Rap1,RPGRIP1,SEMA4C,SMG7,SPAG9,STAT5a/b,STIL,STK26,TNRC6B,TUT7,UPF1,URI1,ZBTB7B	36	22	[Cancer, Connective Tissue Disorders, Organismal Injury and Abnormalities]
7	ADGRG1,ATXN2,BCAS1,Calmodulin,CAMSAP3,CG,Clathrin,Creb,CRTC3,DIP2B,DLG4,FSH,FZD2,G protein alphai,Gpcr,GPR17,HAS2,Ikb,IL1RAPL1,ITPR,KCNN3,KHDC4,KIFC2,LGR5,Lh,Mapk,Metalloprotease,Mmp,Pka,Pka catalytic subunit,PLC,PLCE1,RAB14,SPRED3,ZDHHC17	29	19	[Cancer, Connective Tissue Disorders, Developmental Disorder]
8	ARHGEF,ARHGEF1,ARHGEF17,ARHGEF5,BCR (complex),DAAM2,GTPase,Ifn,Iga,Ige,IgG,IgG1,IgG2a,IgG2b,Igg3,Igm,IL16,Jnk,Laminin (family),MAP3K12,MHC Class II (complex),Nfat (family),PI3K (family),PLC gamma,PLCG2,PLEKHG1,PRDM10,PRKCSH,PTK,REL,SYK,TNN,TRIP10,VAV,VAV2	21	15	[Cellular Assembly and Organization, Cellular Function and Maintenance, Tissue Development]
9	Alp,BMPR1A,CBX4,Collagen(s),CSF1R,CTBP2,Cyclin A,Cyclin E,estrogen receptor,Fgf,Focal adhesion kinase,FOXP1,Gata,GHR,growth factor receptor,IL23,Integrin,KDR,LRIG1,MGAT5,p85 (pik3r),Pdgf (complex),PDGF BB,Pdgfr,PI3K (complex),PIK3R3,PTK7,QARS,Sfk,Smad,SMAD9,STAT,Tgf beta,UNC5B,ZNF592	21	15	[Cardiovascular Disease, Organismal Injury and Abnormalities, Pulmonary Hypertension]
10	ADAT1,AGAP1,CBR4,CCNA1,CCND1,CFAP45,DENND5A,DIP2C,EGLN,ELAVL1,FAM120AOS,FAM131A,FAM57A,HSD17B11,LARP4B,LTO1,MAML3,MFSD14B,NAA25,OTULINL,OVOL2,PANK3,PHTF2,PROCA1,SELENOI,SIRT1,SLC25A43,TM7SF3,TMEM101,TMEM241,TMEM38B,TRIM25,TRIM31,TTC7A,VEZF1	17	13	[Cancer, Organismal Injury and Abnormalities, Reproductive System Disease]
11	ABCC10,ACBD5,ATAD1,ATP5,ATP5F1B,Atp5k,CBLN1,CEND1,DNAJC4,EGFR,Egfr dimer,FANCD2,GGT7,Hd-perinuclear inclusions,HEXDC,HTT,KLHL42,lathosterol,LMTK3,MANEAL,N-acetyl-L-aspartic acid,NCDN,NLRP10,NUBP2,PCDHGA12,phosphorylethanolamine,PIP4P1,RAB5C,RCN3,SERAC1,SLC35F1,SLFN11,TEKT2,TMEM177,TMEM201	17	13	[Amino Acid Metabolism, Molecular Transport, Small Molecule Biochemistry]
12	ACOXL,beta-estradiol,Bex3,BRCA1,CAMK2D,CPPED1,EBF2,EP300,EPHA10,FAM111A,FAM111B,FBXO10,Gm13194,HIST1H2AH,HIST1H2AI,HIST1H2BN,HIST1H3F,HIST1H3J,HIST2H3D,HTRA3,LHFPL2,MCM2,mir-383,MYC,NUPR1,PNCK,PRSS16,REN,SEC31B,Sprr2g,STAC2,TATDN2,TMPRSS2,ZFP69B,ZSWIM6	17	13	[Cell Cycle, Cellular Assembly and Organization, Cellular Function and Maintenance]
13	Ap1,Calcineurin protein(s),caspase,CCDC15,CD3,Collagen type II,cytokine,DNAJB5,EIF2S3,Histone h3,HNRNPR,Hsp70,Hsp90,IL1,IL12 (complex),Immunoglobulin,Interferon alpha,LDL,LY75,Mek,MMP2,NF2,NFE2L3,P38 MAPK,Rac,RAS,Ras homolog,Rock,SERPINA3,SLC19A2,SLC25A12,SRRM2,TCR,Tnf (family),Vegf	16	12	[Cancer, Gastrointestinal Disease, Organismal Injury and Abnormalities]
14	16,16-dimethylprostaglandin E2,ACBD7,APOL5,azelaic acid,BCL2,BNIPL,C17orf80,C1GALT1,CD44,CMIP,CYP4F12,Fcer1g dimer,FYN,GAB3,glycosylphosphatidylinositol,GP6 dimer,LILRA5,LINC00963,LYN,MIEF1,MOAP1,PLEKHH2,PRUNE2,RAPGEFL1,RCN3,SCG3,SCIMP,Sh2d1b2,SHROOM2,SPNS1,SRC,ST5,stearic acid,TNF,TULP4	12	10	[Cell Death and Survival, Lymphoid Tissue Structure and Development, Organ Morphology]
15	1,2-diacylglycerol,2'-fucosyllactose,24R,25-dihydroxyvitamin D3,ADGRA3,Androgen-AR,AR,ARMCX2,C7orf31,CLK3,CLVS2,Flt1,GPR182,GPR87,GRK6,HSPA1A/HSPA1B,JCAD,MAPK3,MTNR1A,N-docosahexaenoylethanolamine,OVGP1,PCDHB10,PGP,PIM,Plc delta,PRKCD,PSCA,PTPDC1,RALGAPA1,RNF2,RXFP2,SRC (family),STYK1,TMEM102,TTC9,UBE2O	12	10	[Behavior, Reproductive System Development and Function, Cellular Development]
16	ACCS,B3GNT4,CEP68,COPS9,CPN2,CTAG1A/CTAG1B,CTCF,CUL1,CUL4B,DCUN1D2,DCUN1D4,DNAJC10,DNAJC17,DNAJC28,EFCAB1,FBF1,HIST1H2AI,HIST1H2AJ,HIST1H2AK,HIST1H2AL,HIST1H2AM,HNF4A,HSPB9,IGHV3OR15-7,KRT24,MSRB1,MSRB2,NUDT11,OTUD7A,PCDHGA4,PHPT1,REXO2,TMCC2,TRAF6,ZKSCAN5	9	8	[Post-Translational Modification, Cell Death and Survival, Embryonic Development]
17	SRPK1,ZNF514	2	1	[Cancer, Gastrointestinal Disease, Organismal Injury and Abnormalities]
18	NALP,NLRP8	2	1	[Cancer, Dermatological Diseases and Conditions, Organismal Injury and Abnormalities]
19	GALNTL6,polypeptide N-acetylgalactosaminyltransferase	2	1	[Cancer, Organismal Injury and Abnormalities, Renal and Urological Disease]
20	IL7R,PCDHB11,PCDHB13	2	1	[Cell Cycle, Cell Death and Survival, Cellular Function and Maintenance]
